# Supplementary material
Source: publisher figshare collection journal article supplement (https://acs.figshare.com/ndownloader/files/12777812)
Supplement: Supplementary file 1 [file 12777812]

## Supporting Information

### **A domino N<sub>2</sub>-extrusion-cyclization of alkynylarylketone derivatives for the synthesis of indoloquinolines and carbocycle-fused quinolines**

Bhornrawin Akkachairin,<sup>†</sup> Jumreang Tummatorn,<sup>\*</sup> <sup>†‡</sup> Narumol Khamсуwan<sup>‡</sup>  
Charnsak Thongsornkleeb<sup>†‡</sup> and Somsak Ruchirawat<sup>†‡</sup>

<sup>†</sup>Program on Chemical Biology, Chulabhorn Graduate Institute, Center of Excellence on Environmental Health and Toxicology (EHT), Ministry of Education, 54 Kamphaeng Phet 6, Laksi, Bangkok 10210, Thailand

<sup>‡</sup>Laboratory of Medicinal Chemistry, Chulabhorn Research Institute, 54 Kamphaeng Phet 6, Laksi, Bangkok 10210, Thailand

| <b>Contents:</b>                                                                                        | <b>Pages</b> |
|---------------------------------------------------------------------------------------------------------|--------------|
| 1. Copies of <sup>1</sup> H and <sup>13</sup> C- NMR spectra for compound <b>1a-1x</b>                  | S2-S49       |
| 2. Copies of <sup>1</sup> H and <sup>13</sup> C- NMR spectra for compound <b>2a-2x'</b> and <b>3a</b>   | S50-S111     |
| 3. Copies of <sup>1</sup> H and <sup>13</sup> C- NMR spectra for compound <b>8a-8q</b> and <b>9a-9b</b> | S112-S151    |
| 4. Copies of <sup>1</sup> H and <sup>13</sup> C- NMR spectra for compound <b>4a-4r</b> and <b>6a-6b</b> | S152-S191    |
| 5. Copies of <sup>1</sup> H and <sup>13</sup> C- NMR spectra for compound <b>5a-5r</b> and <b>7a-7b</b> | S192-S239    |
| 6. Optimazation of Method for the synthesis of indoloquinolines (Table S1)                              | S240         |
| 7. Optimazation of Method for the synthesis of carbocycle-fused quinolines (Table S2)                   | S241         |

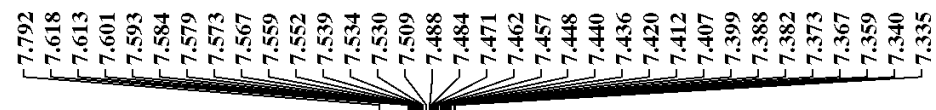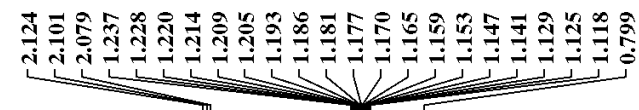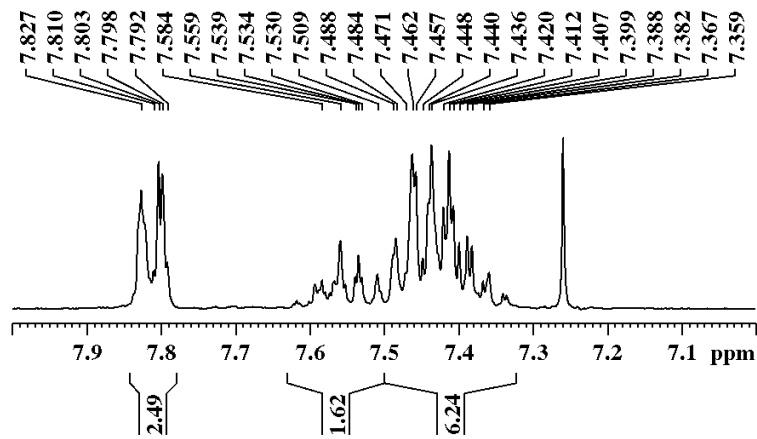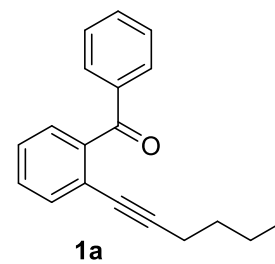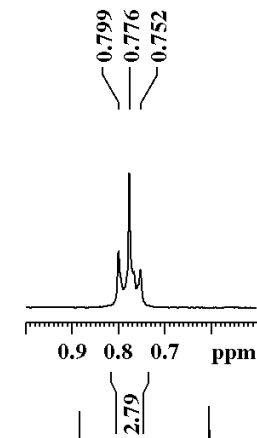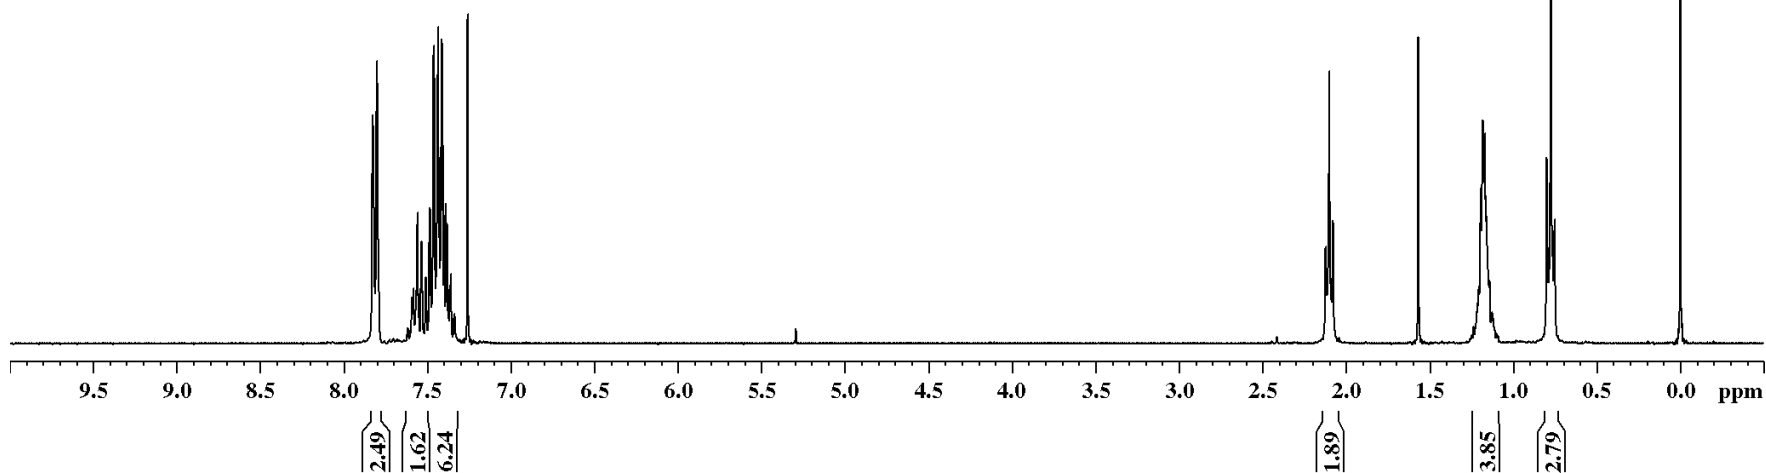

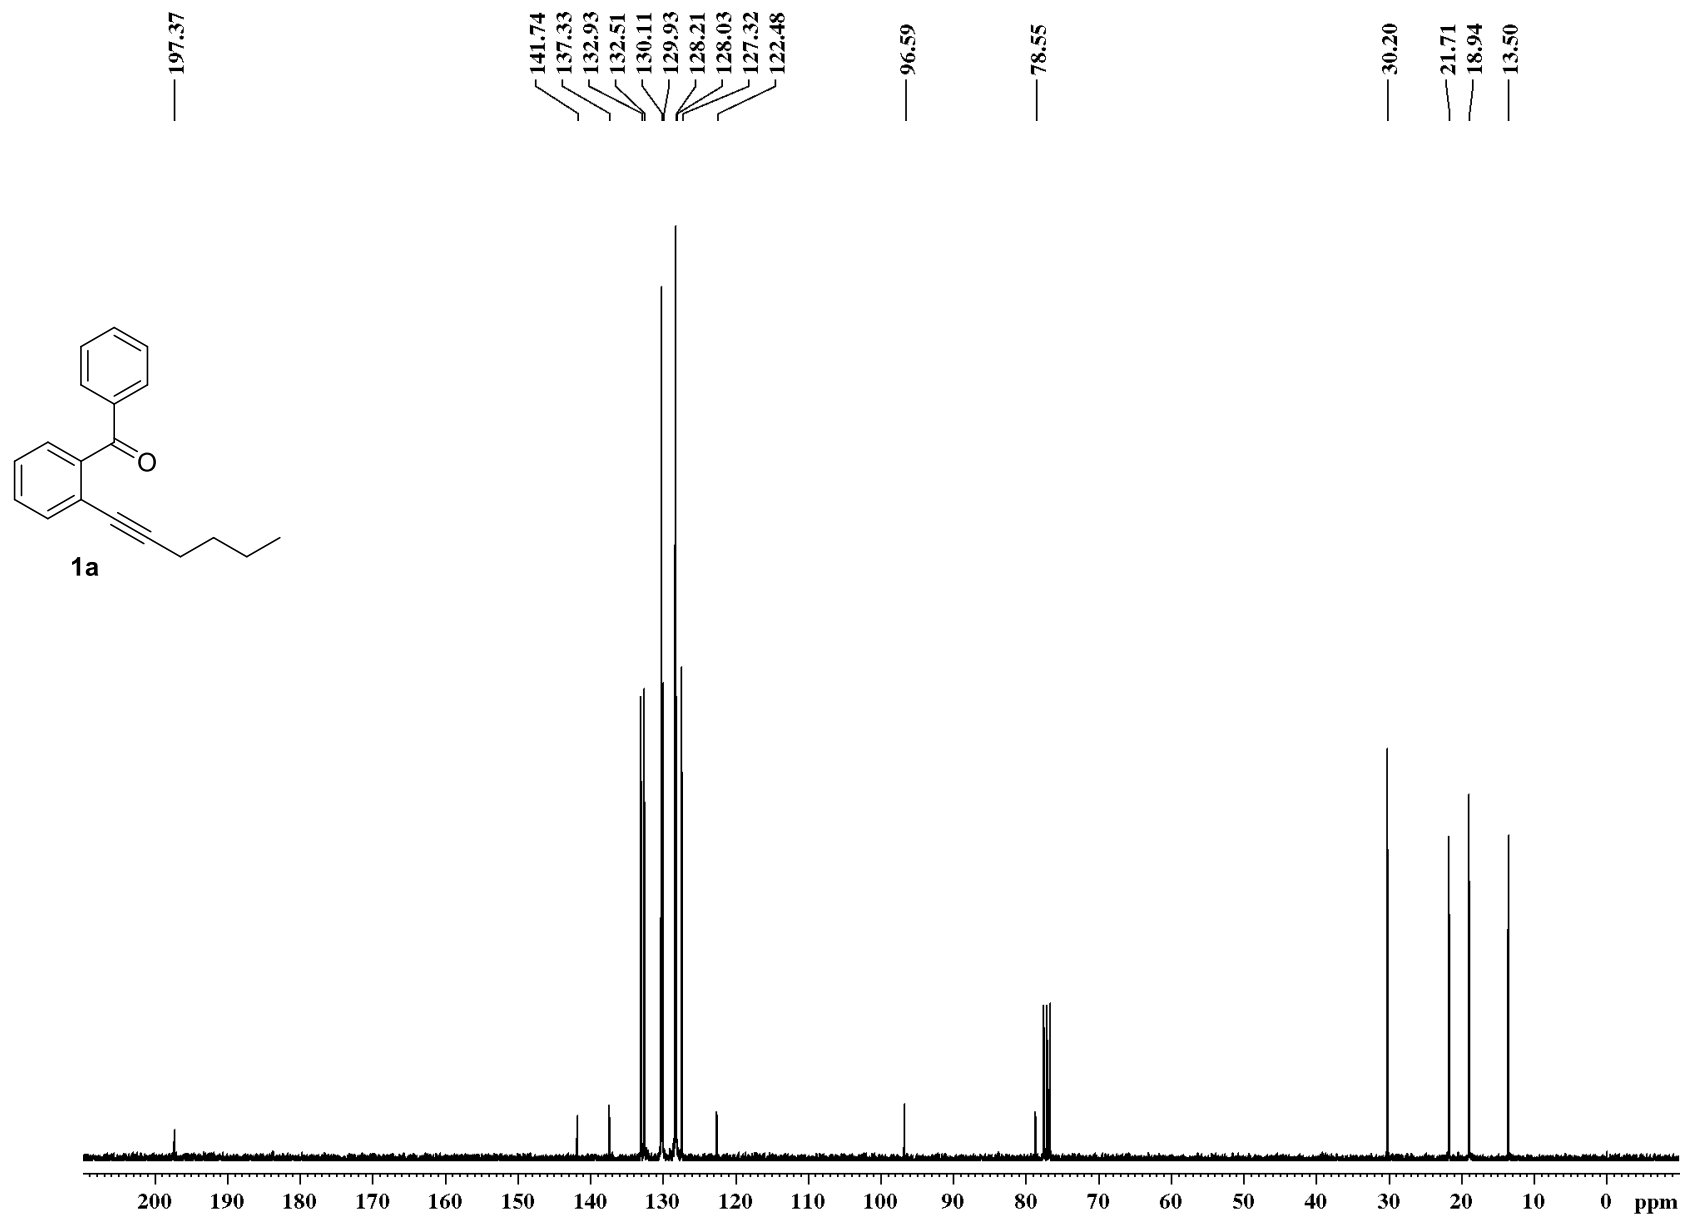

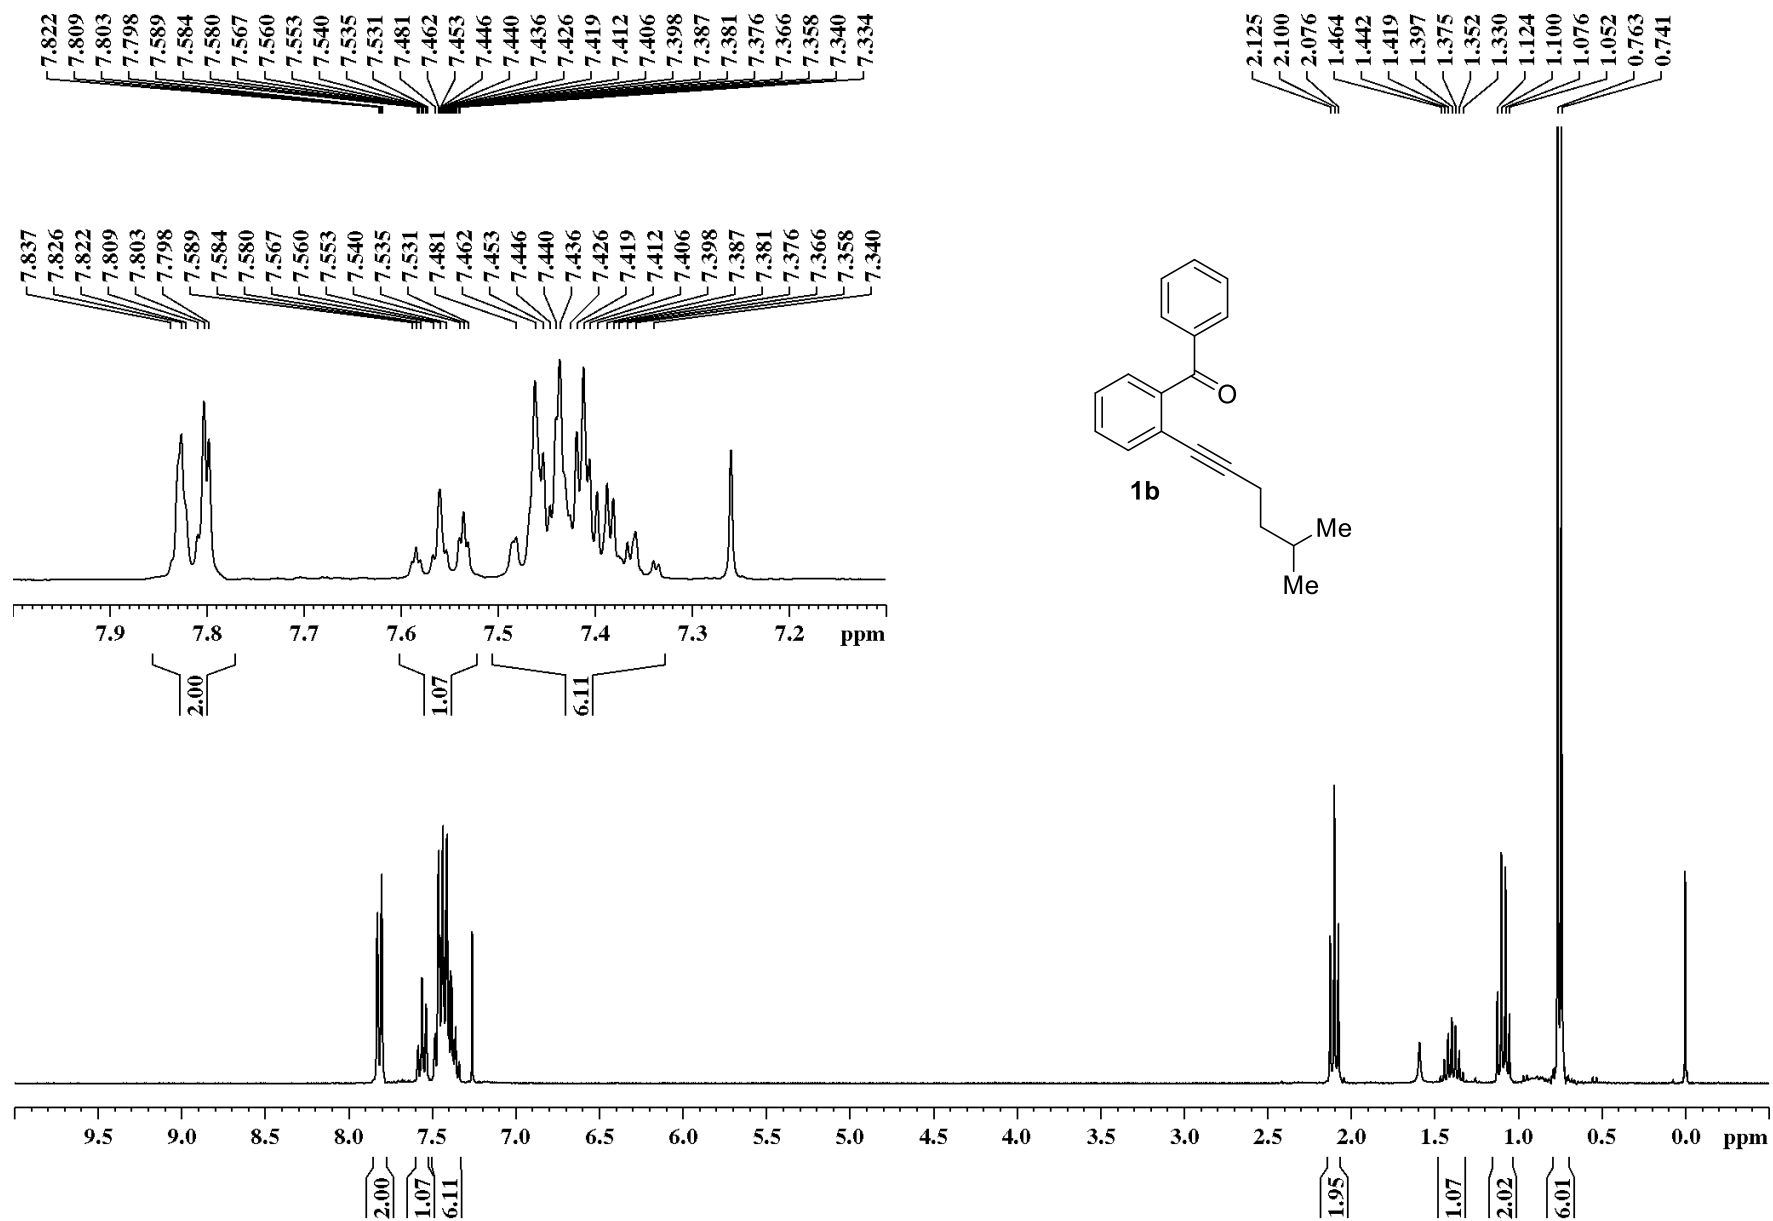

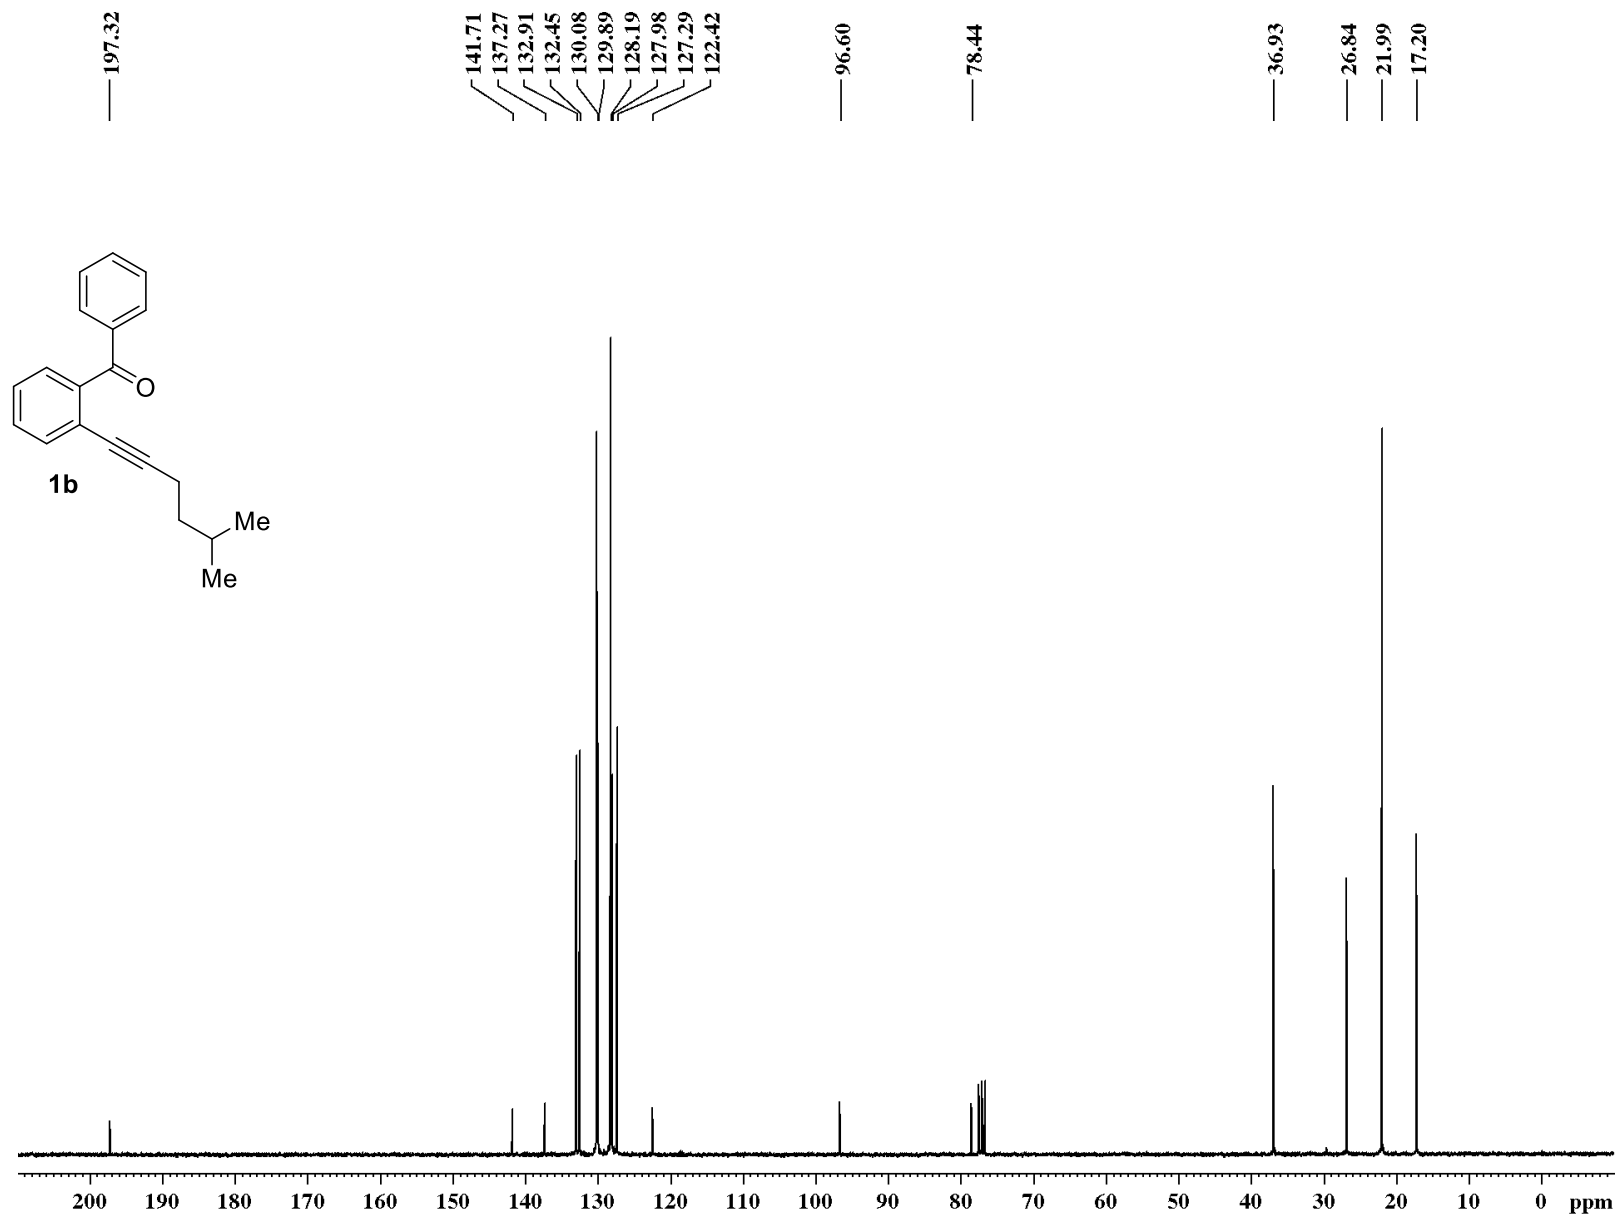

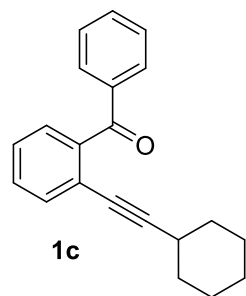

7.829  
7.811  
7.808  
7.571  
7.552  
7.534  
7.475  
7.457  
7.451  
7.432  
7.416  
7.399  
7.395  
7.383  
7.379  
7.361  
7.346  
7.343

2.308  
2.286  
2.275  
2.265  
1.494  
1.470  
1.404  
1.380  
1.169  
1.148  
1.127  
1.105  
1.081

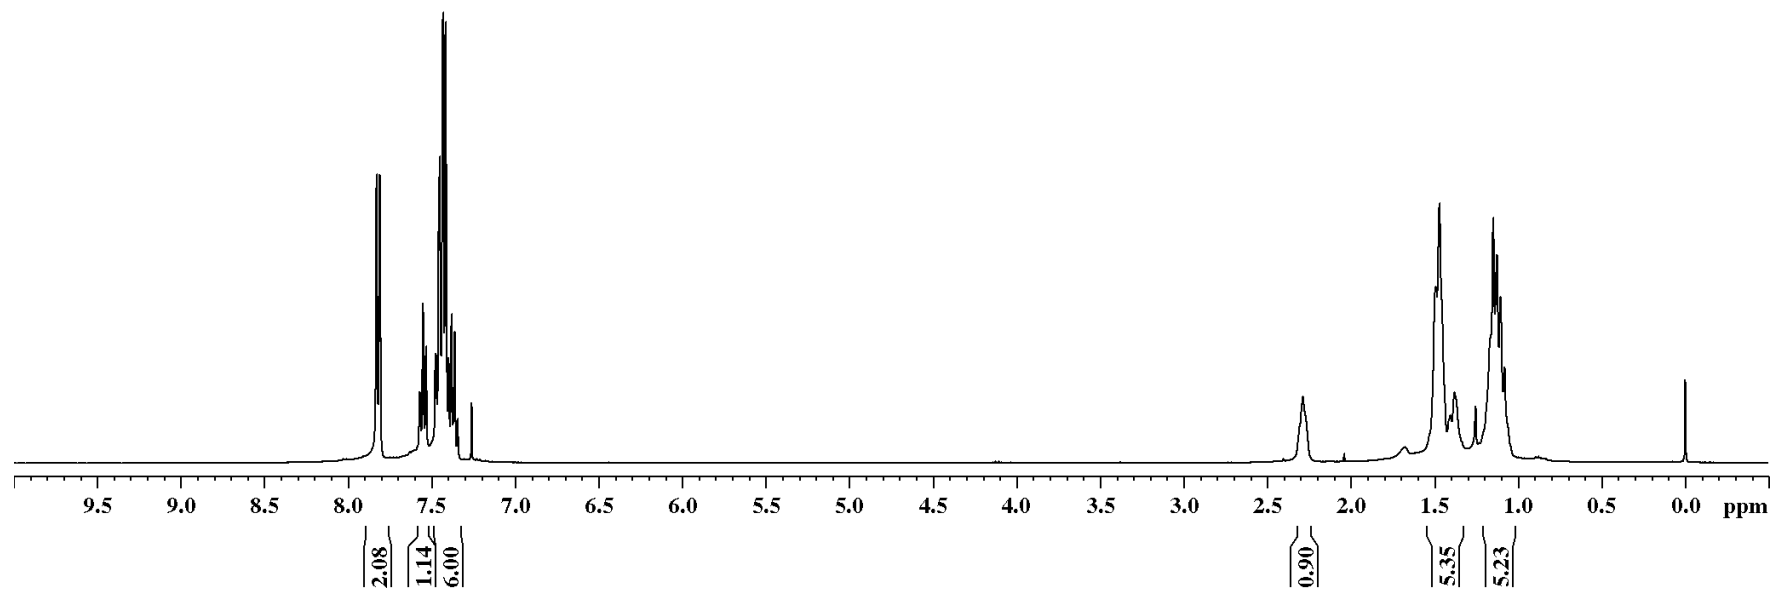

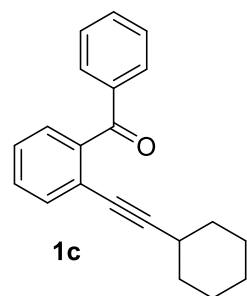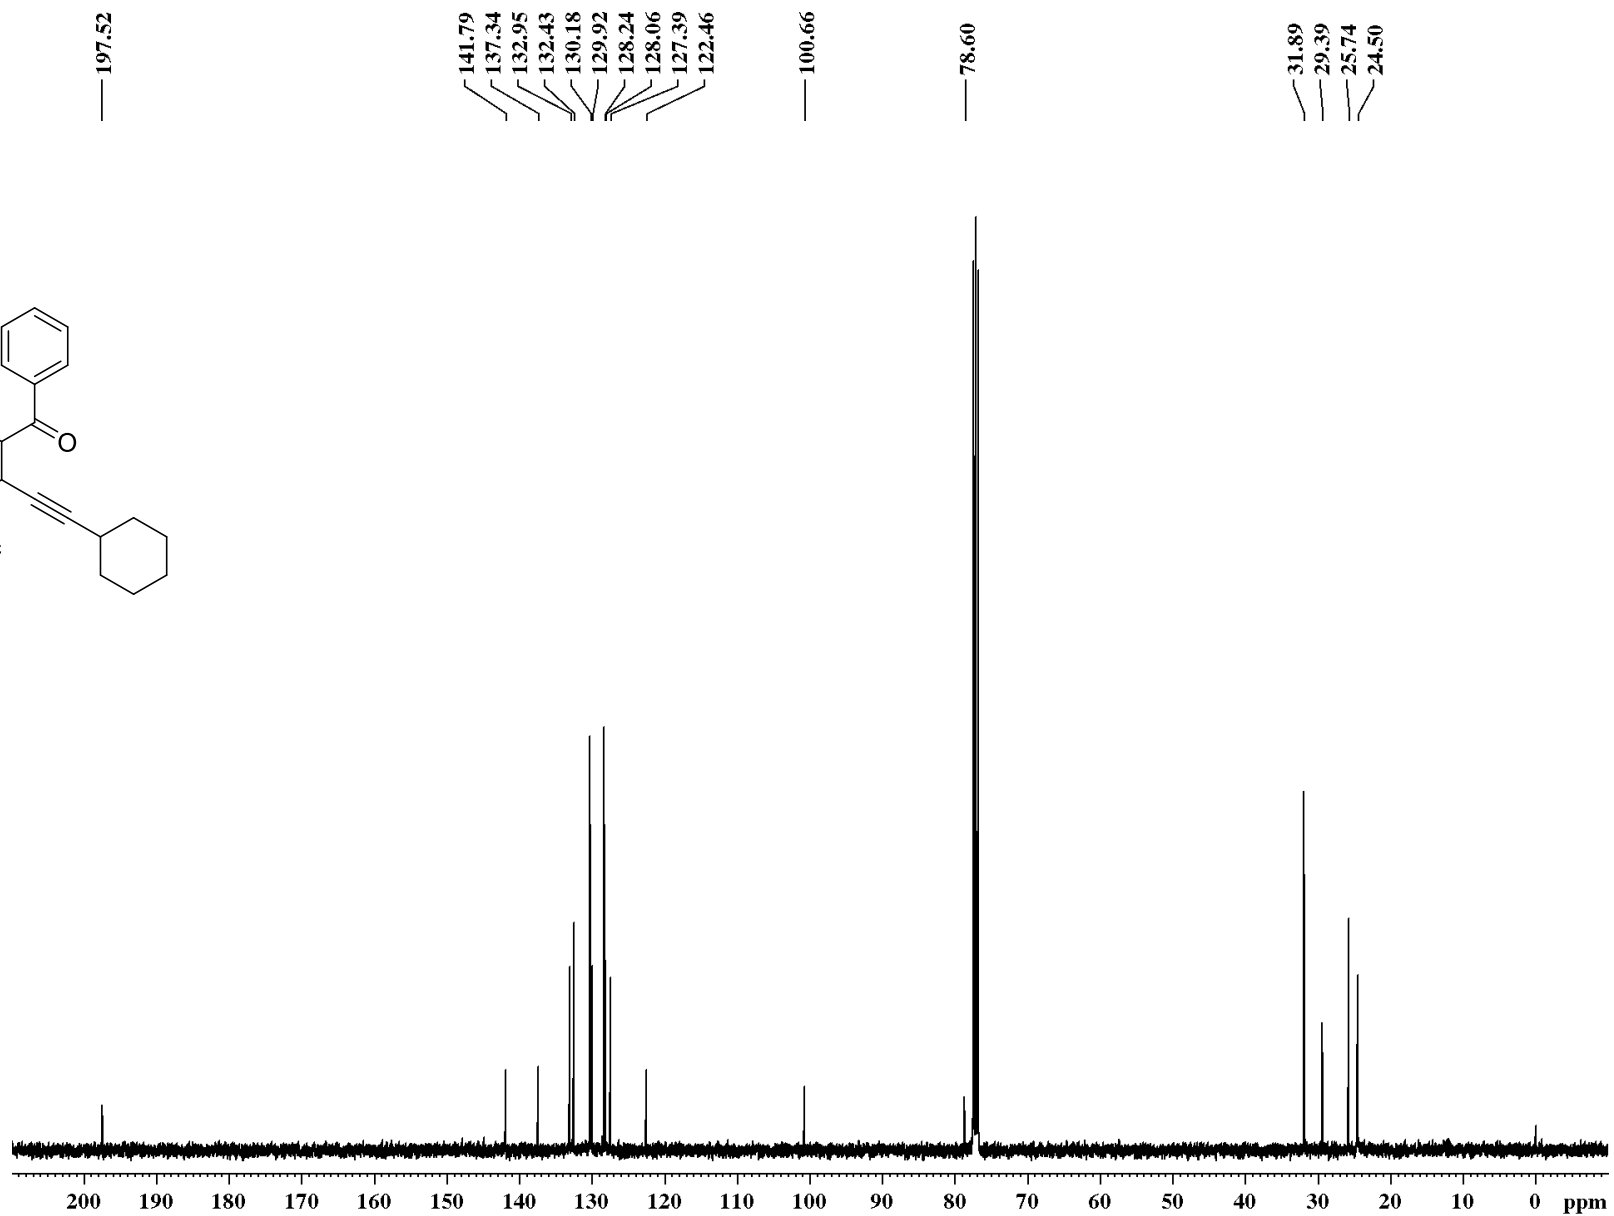

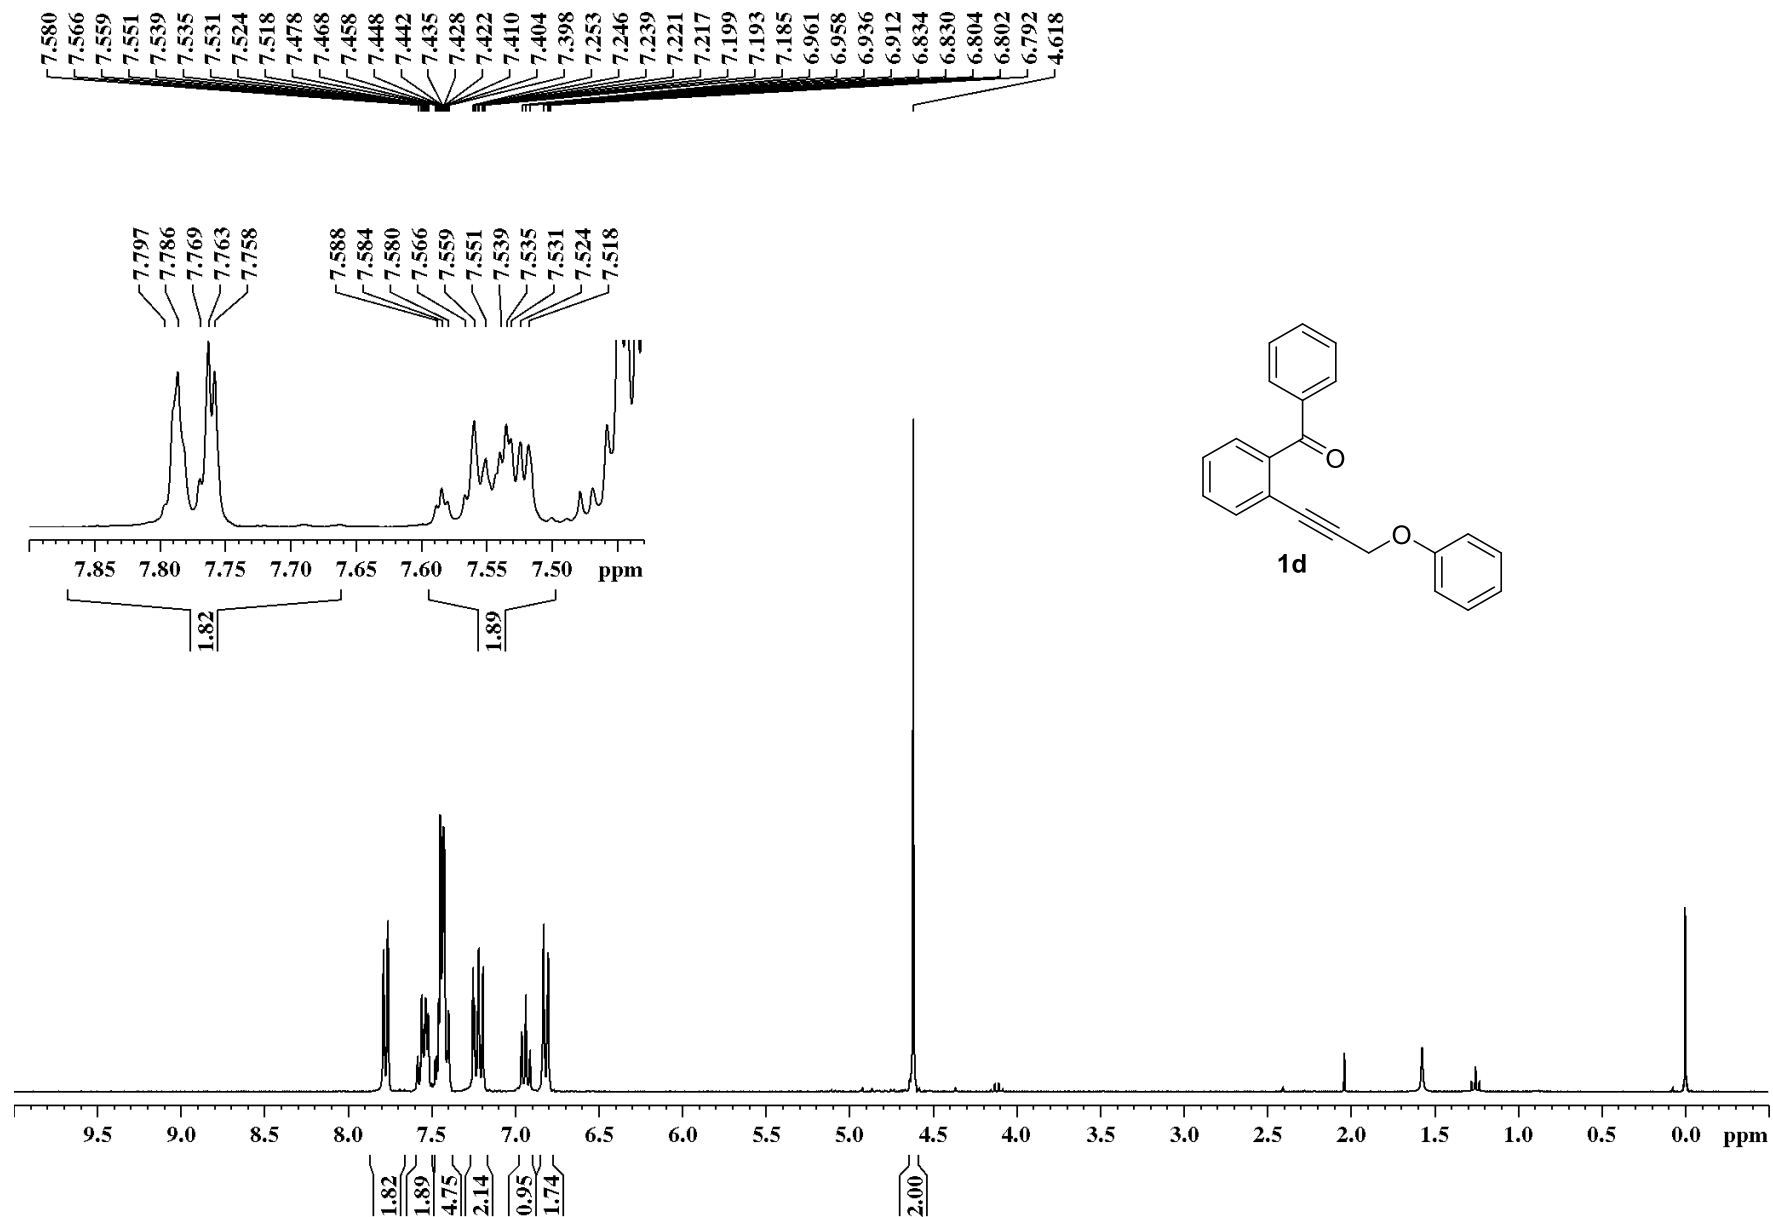



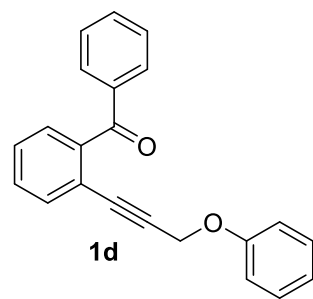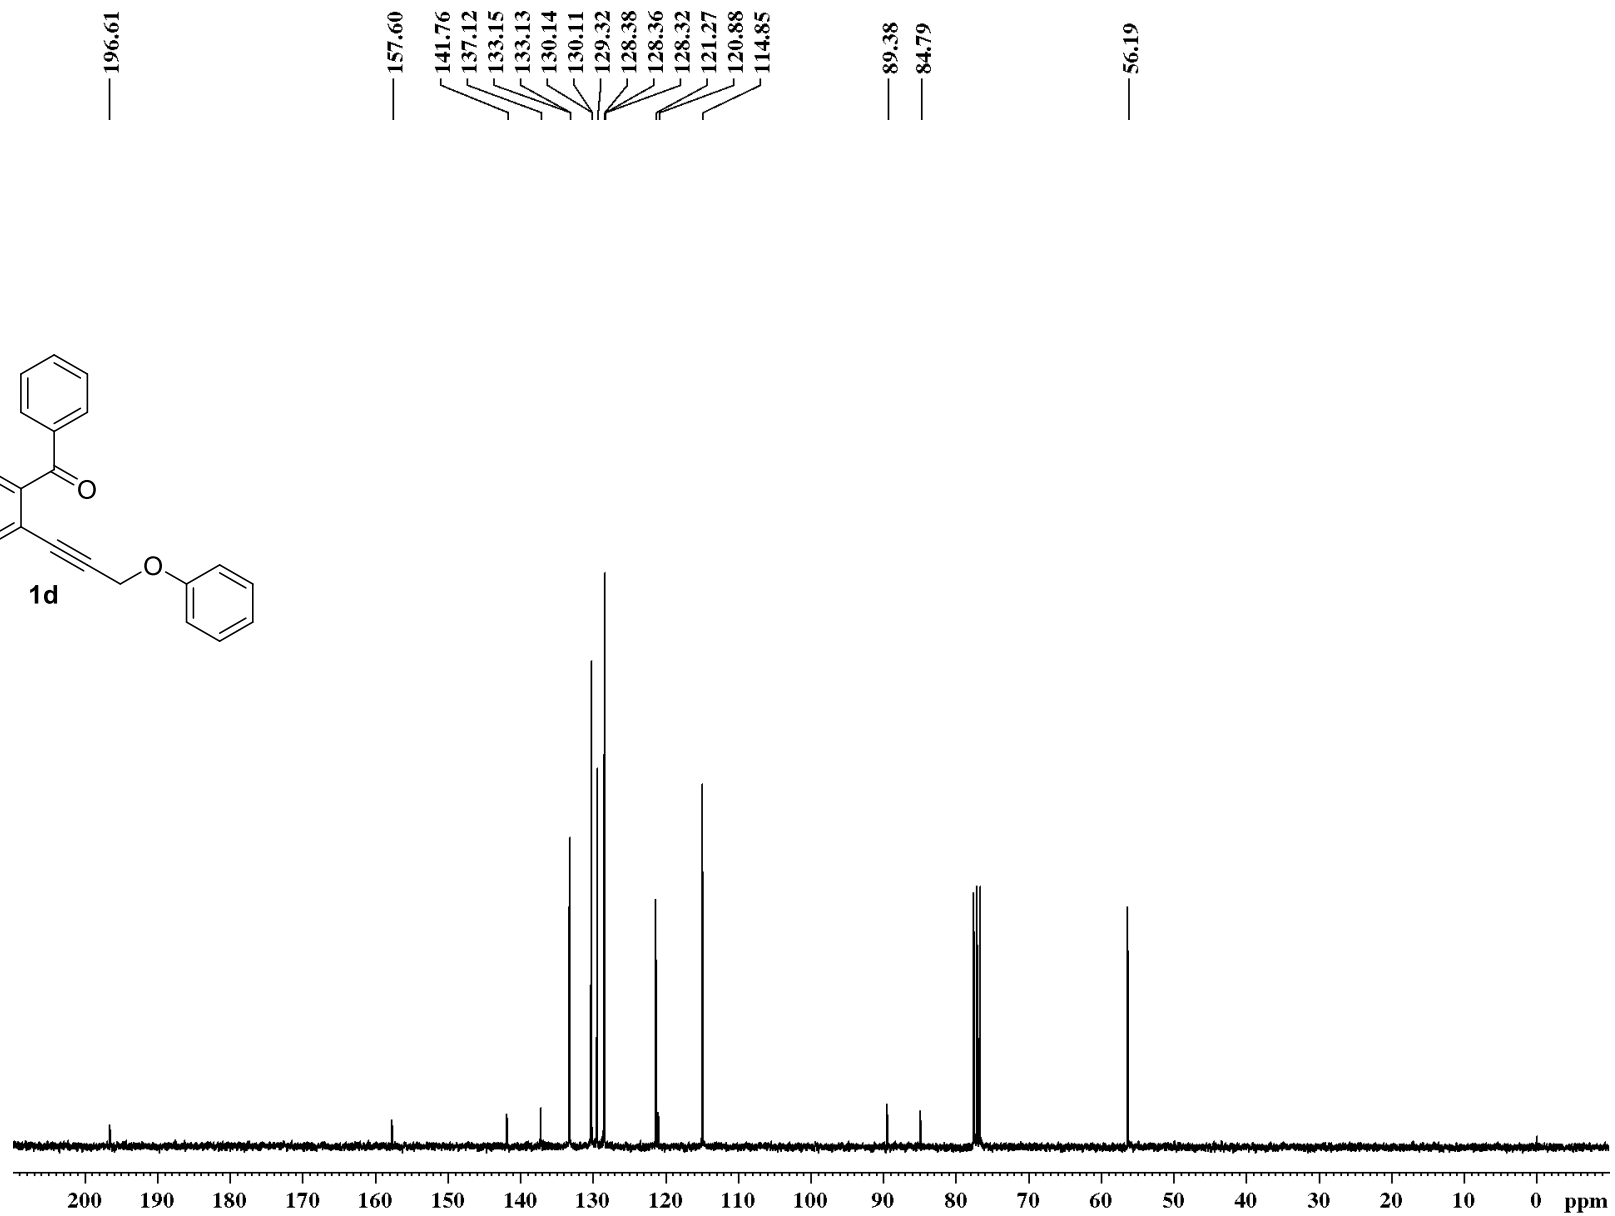

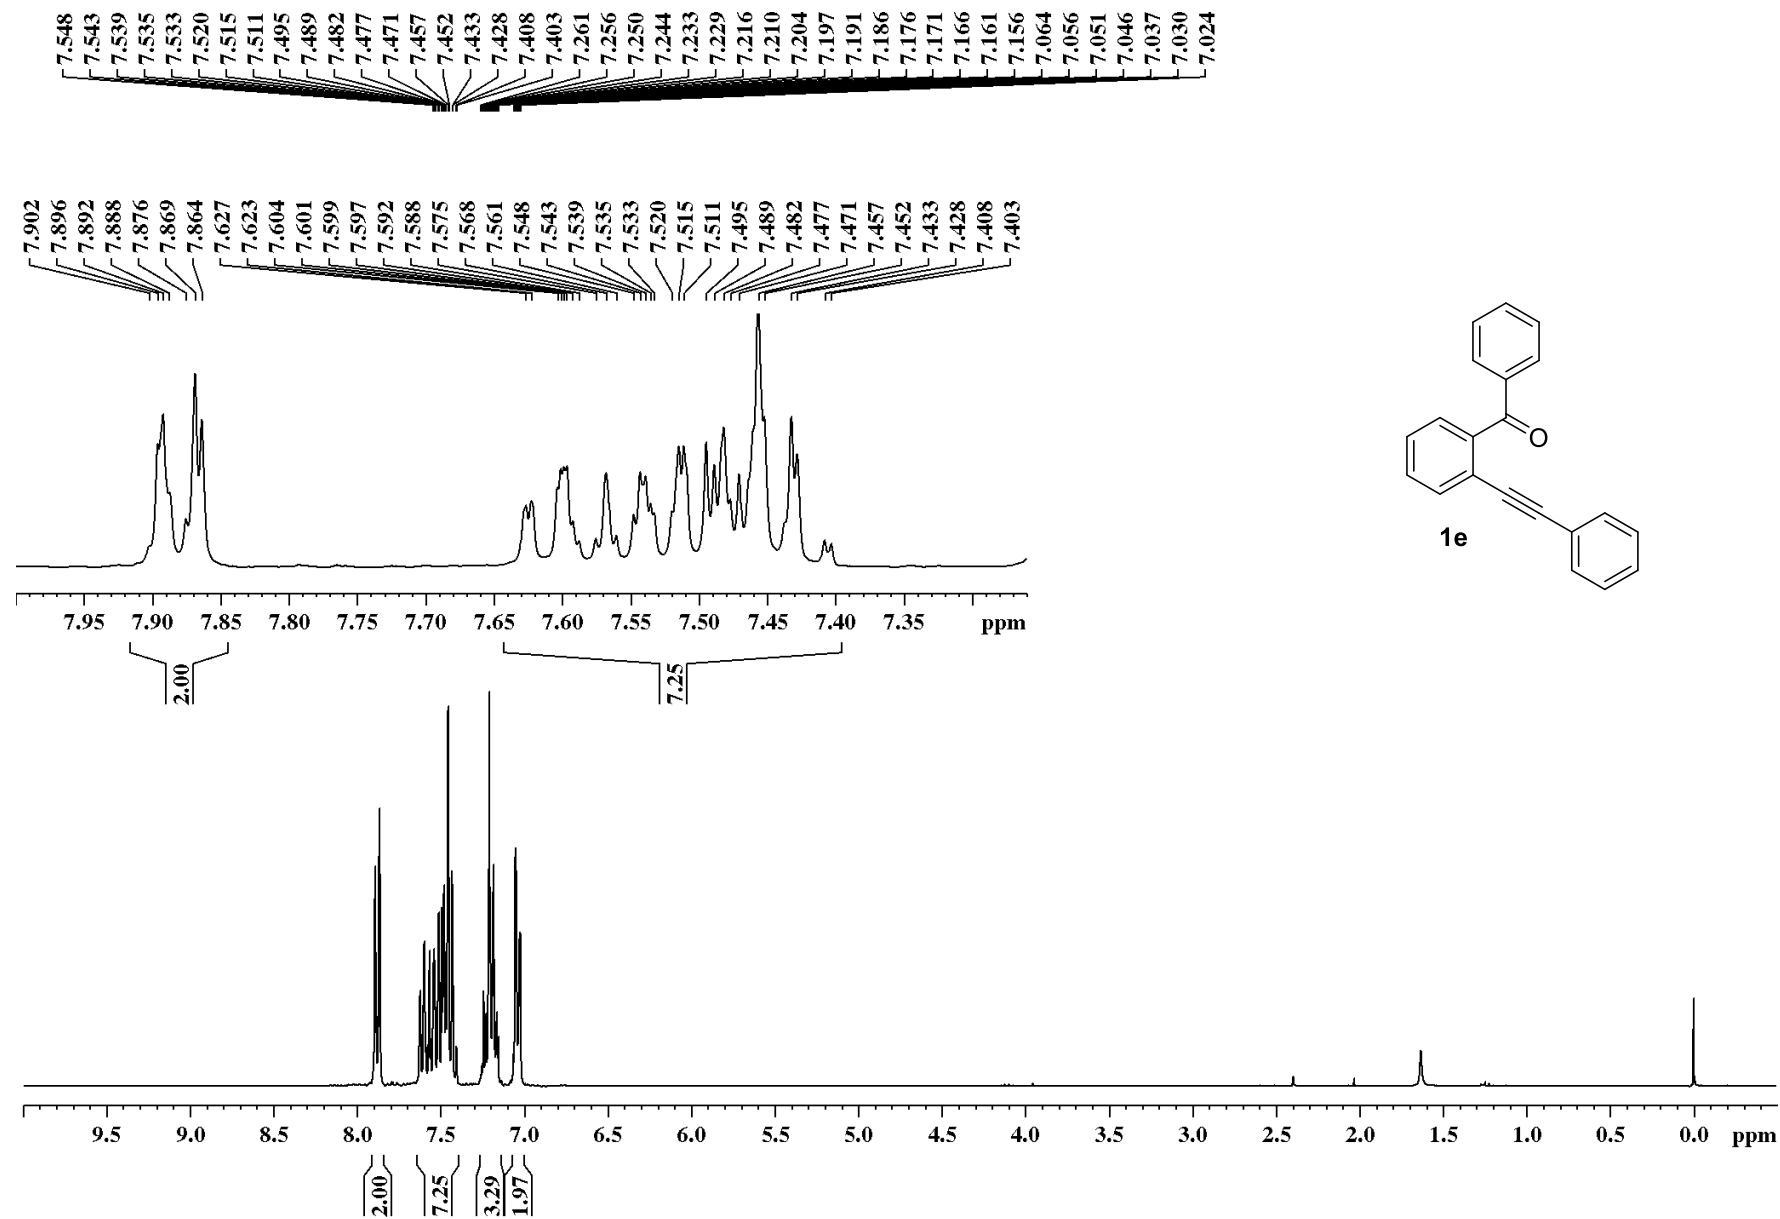

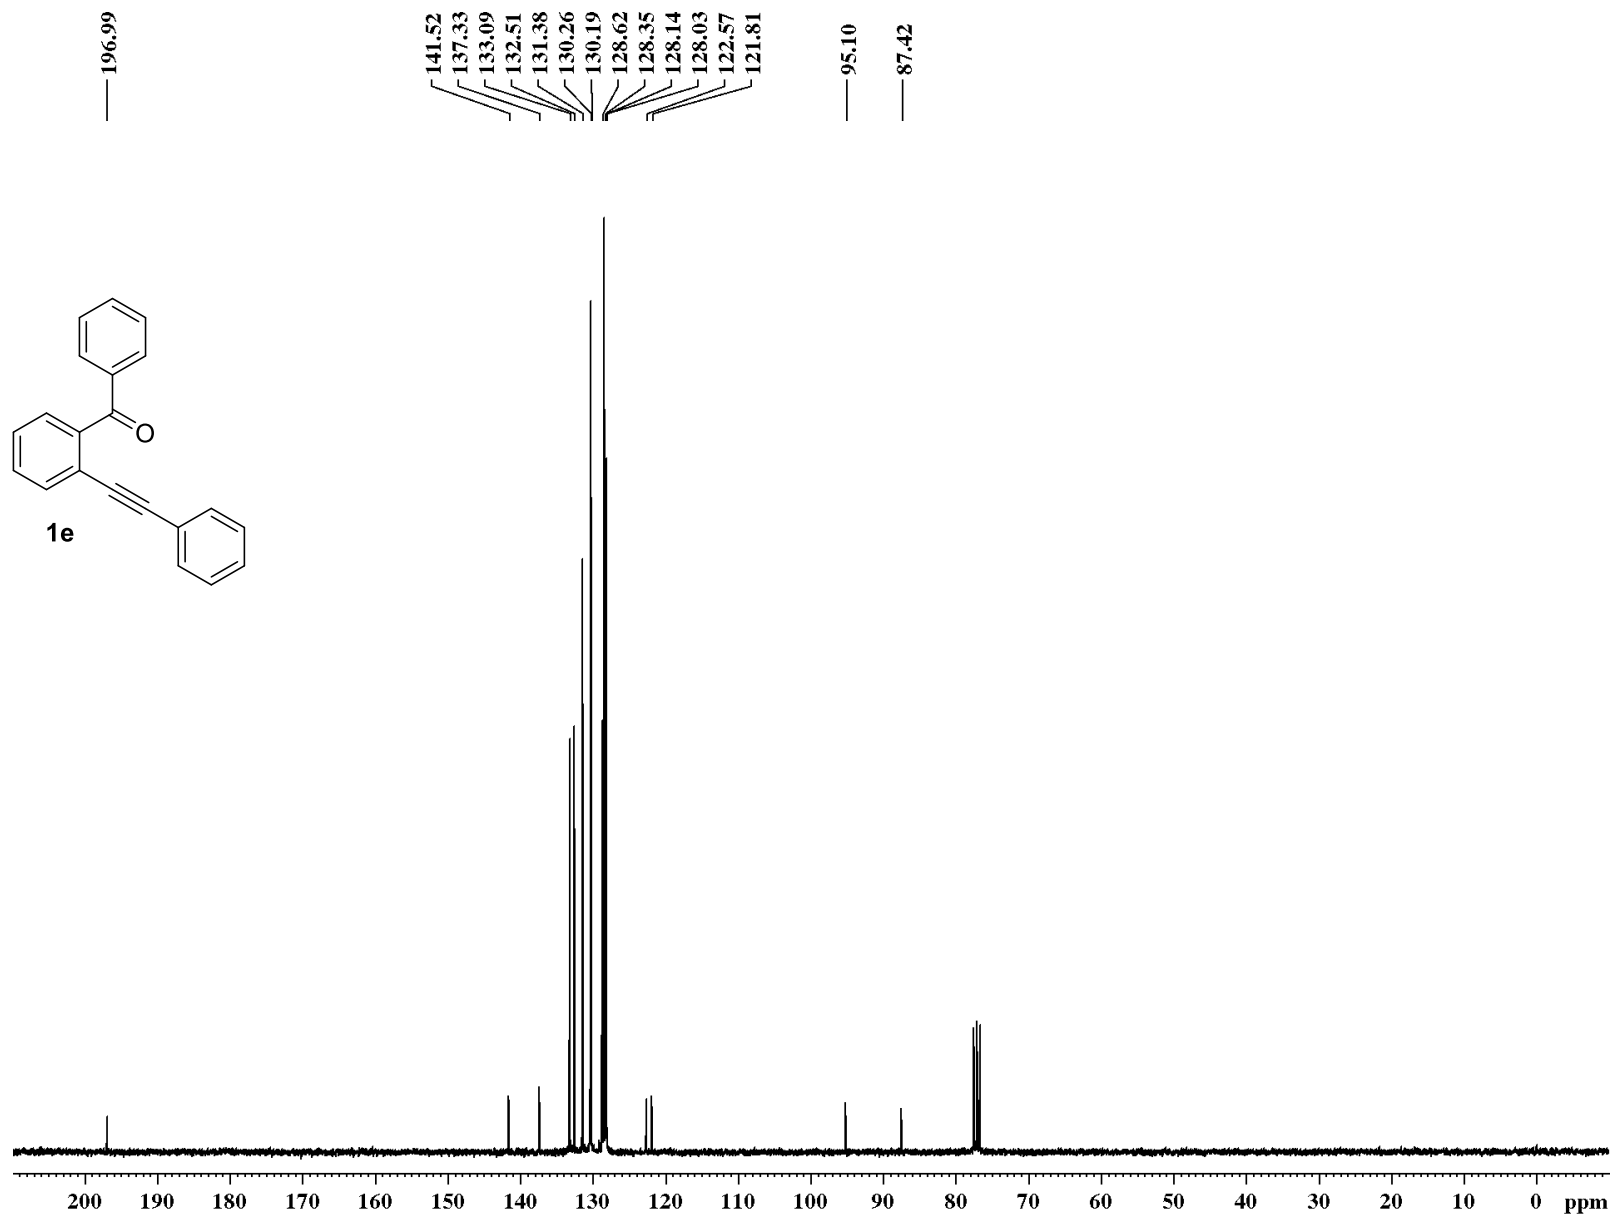

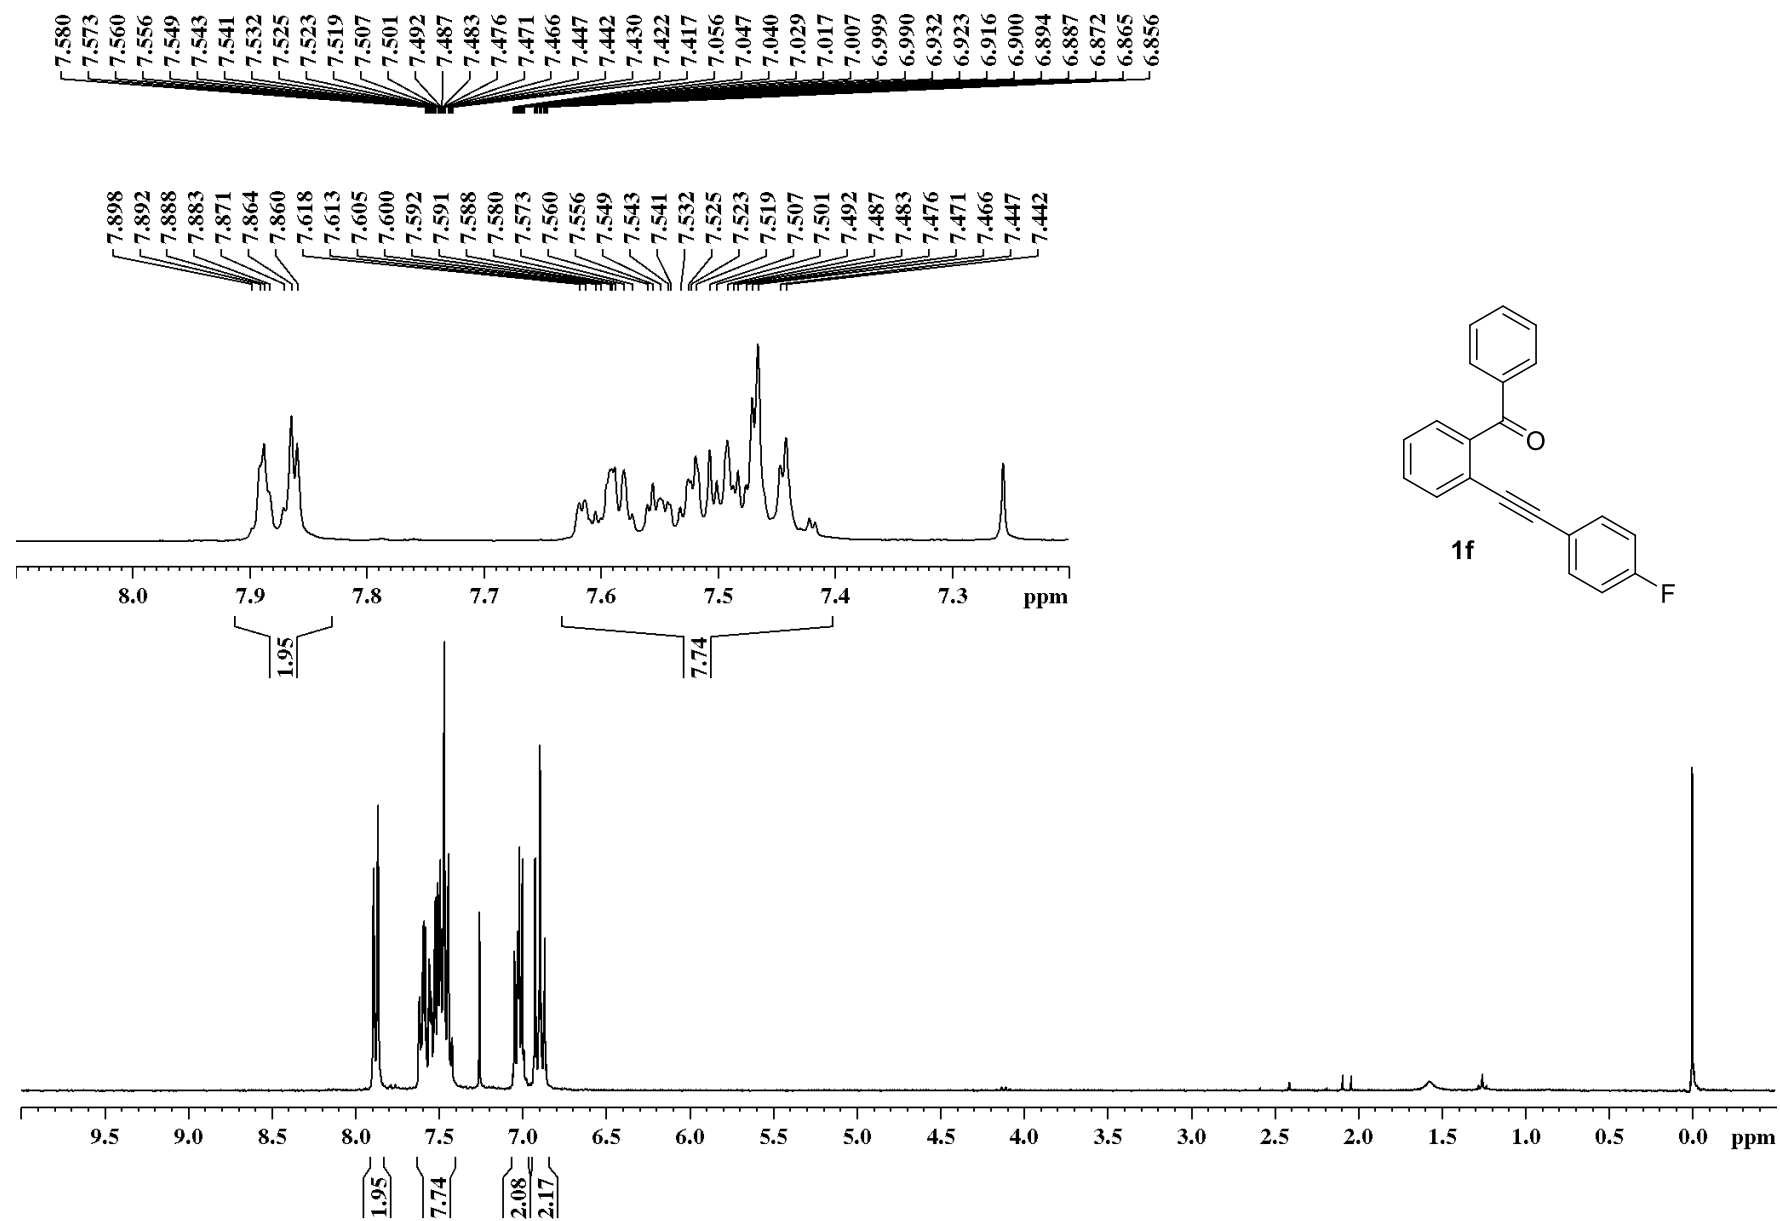

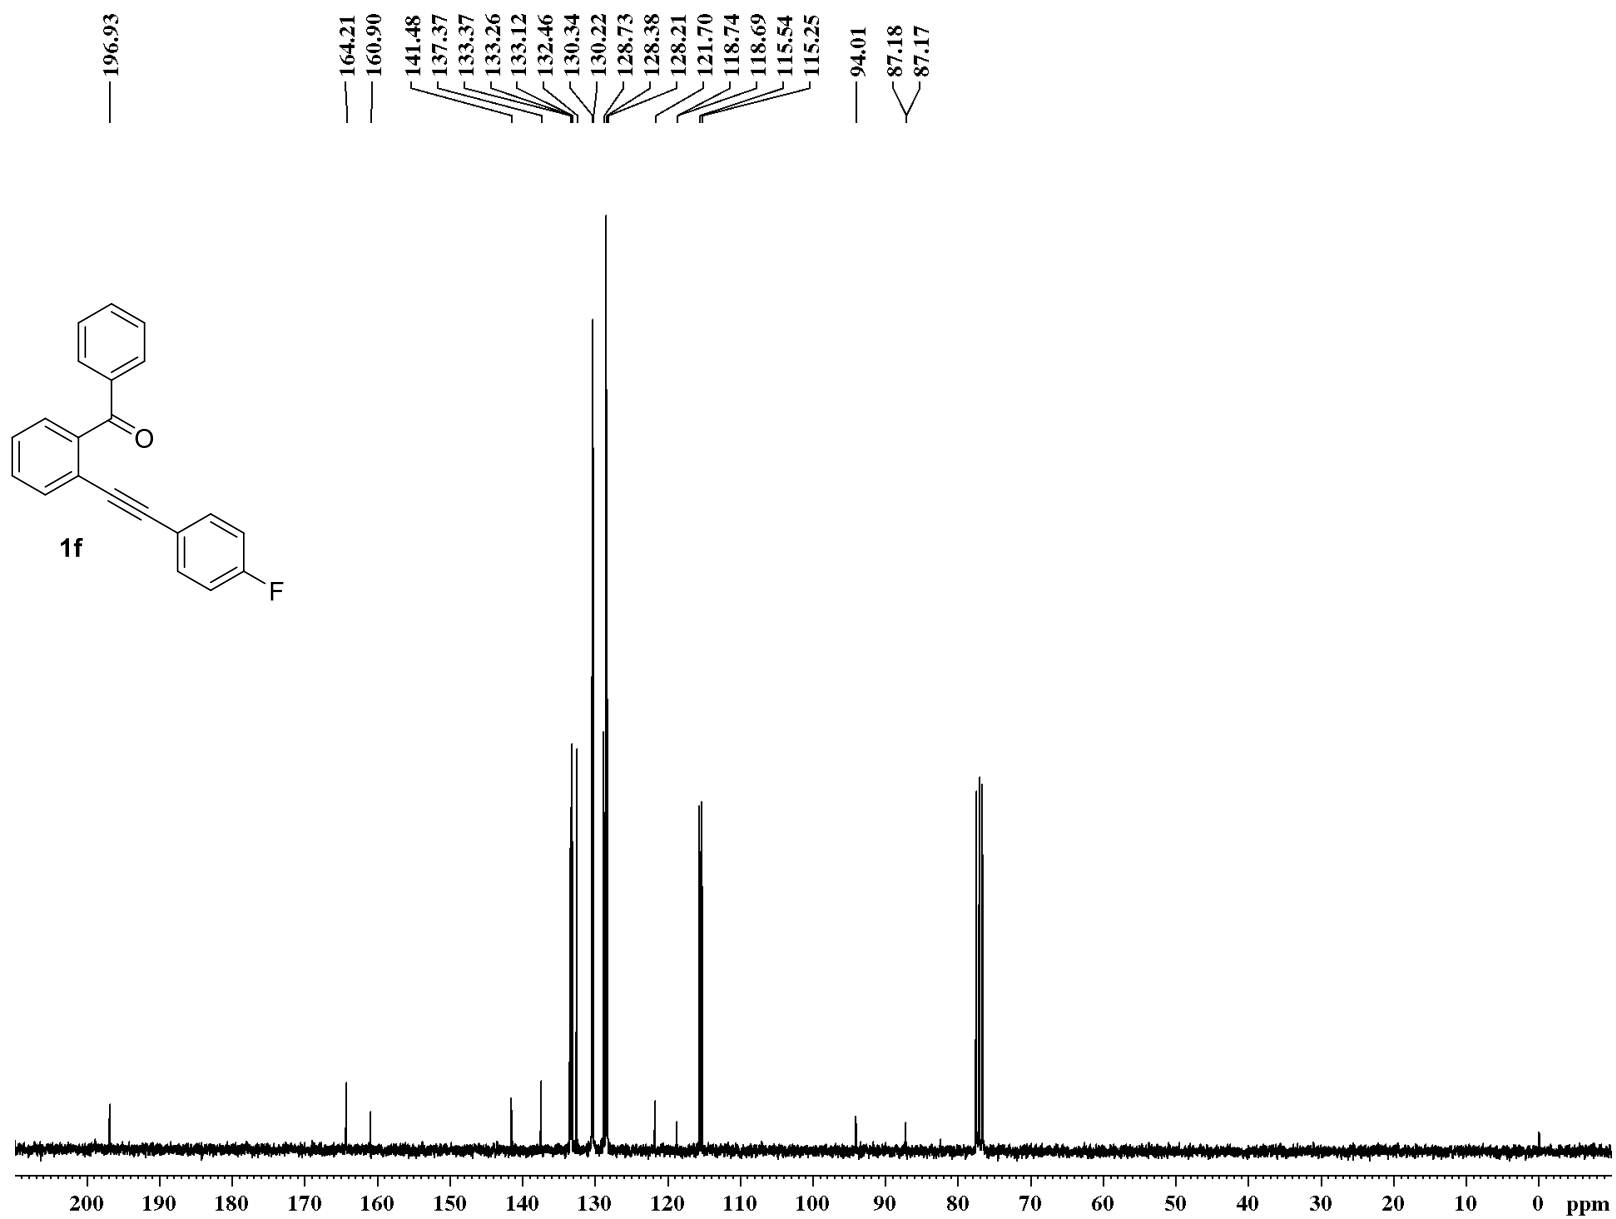

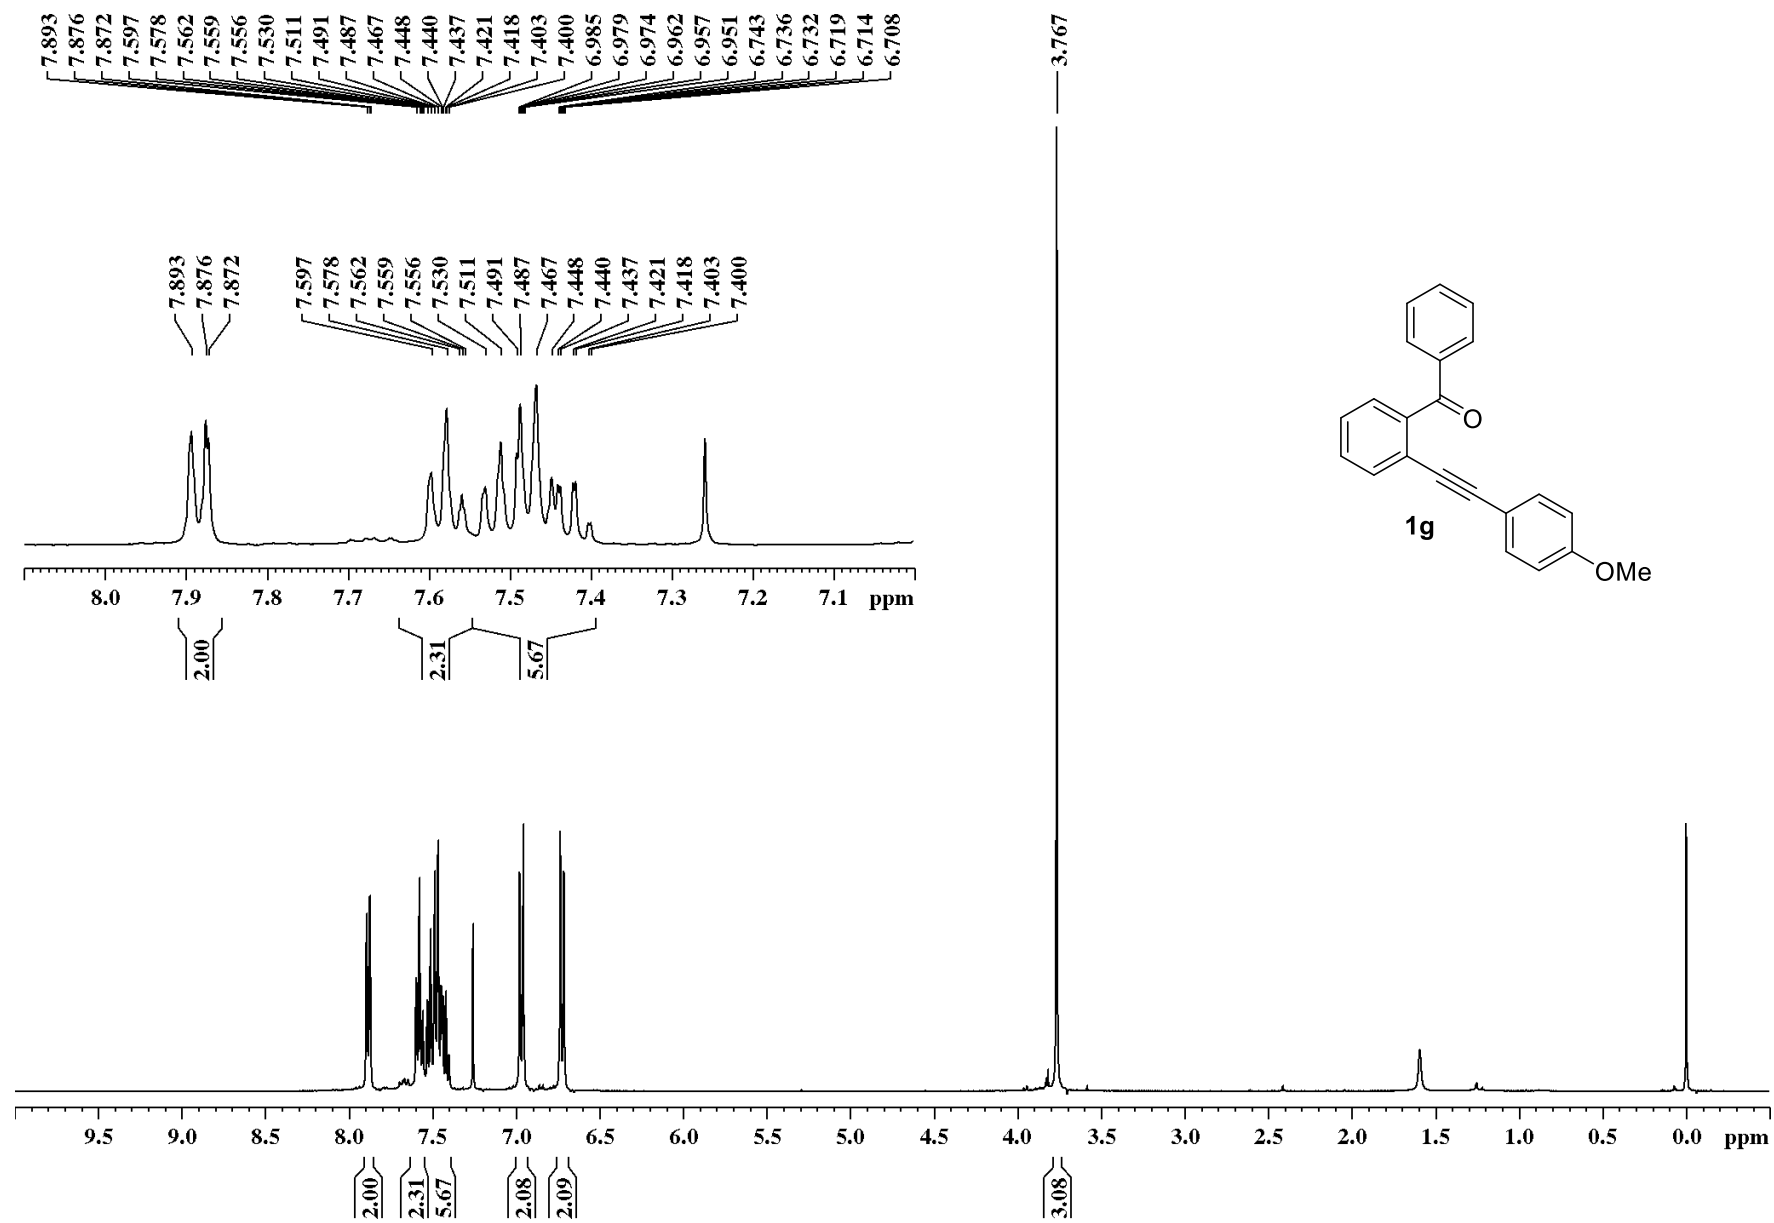

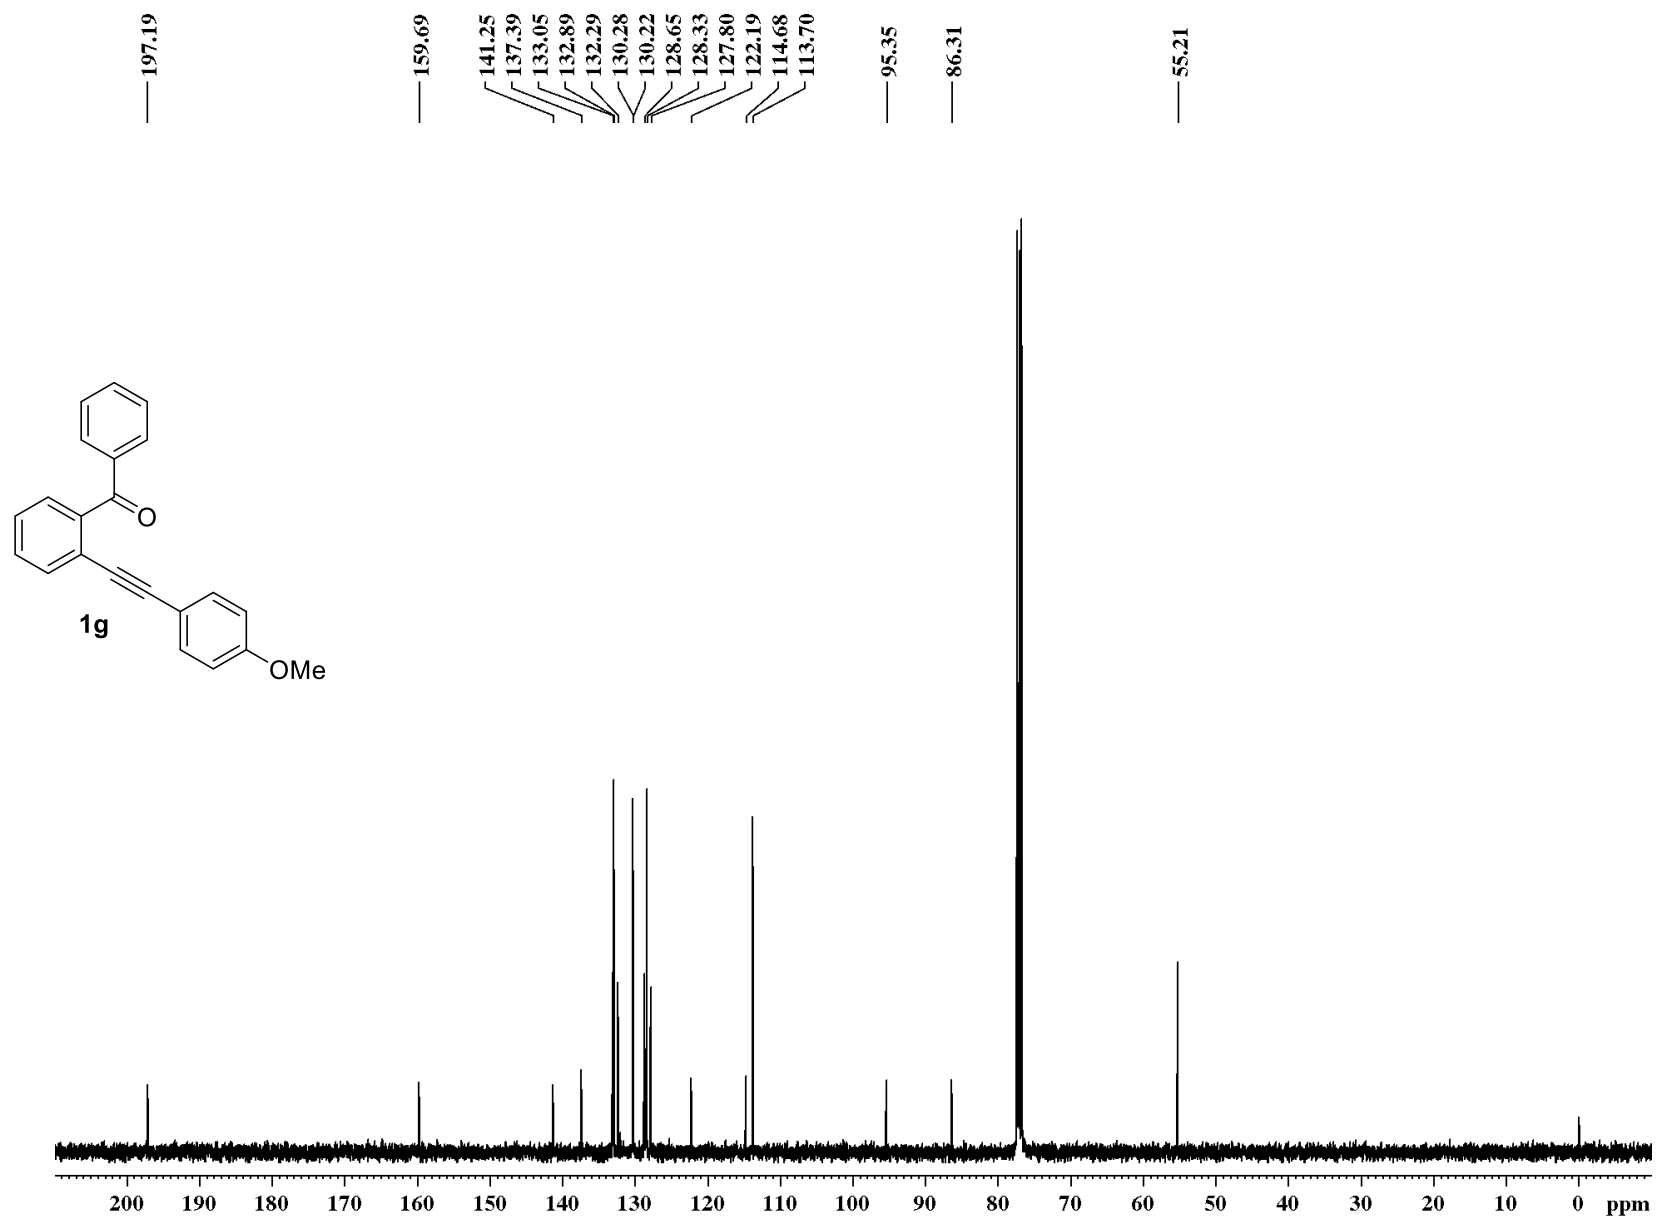

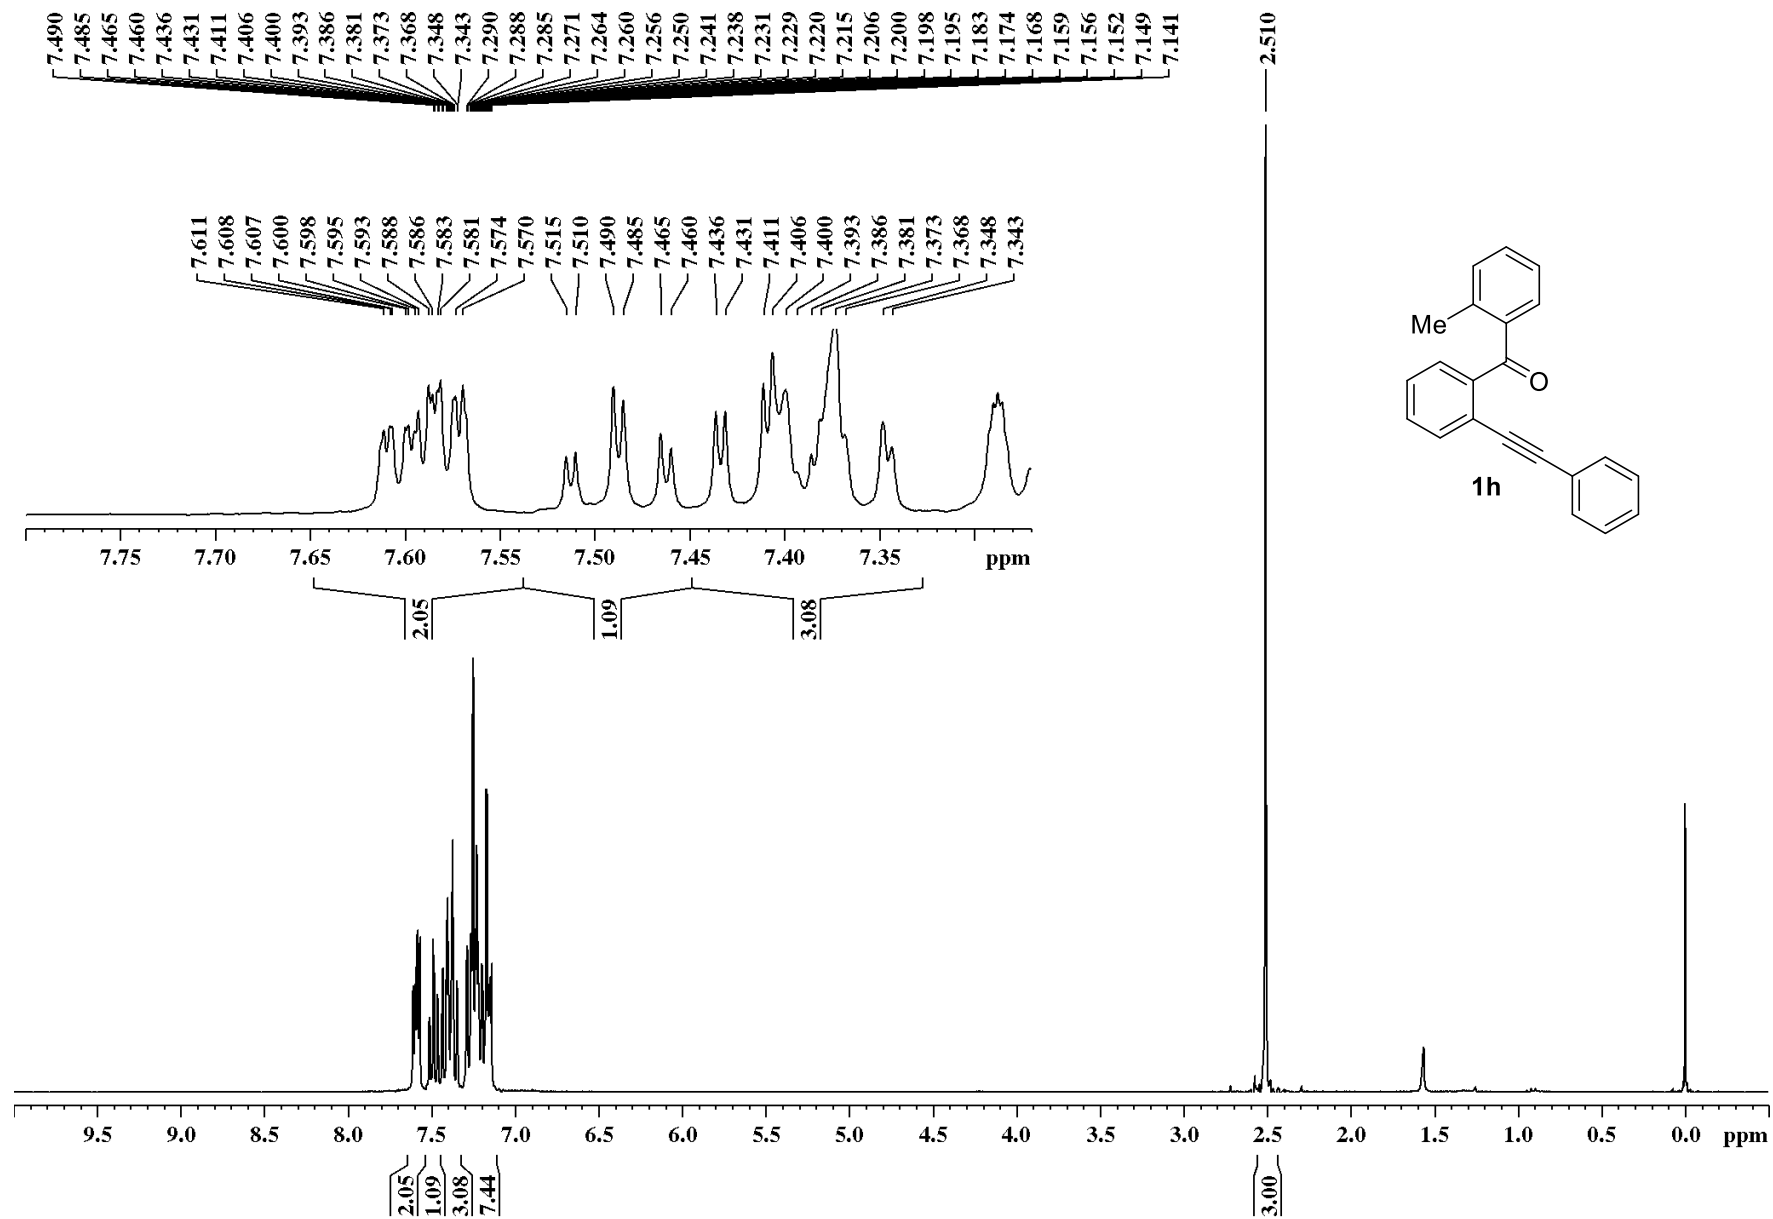



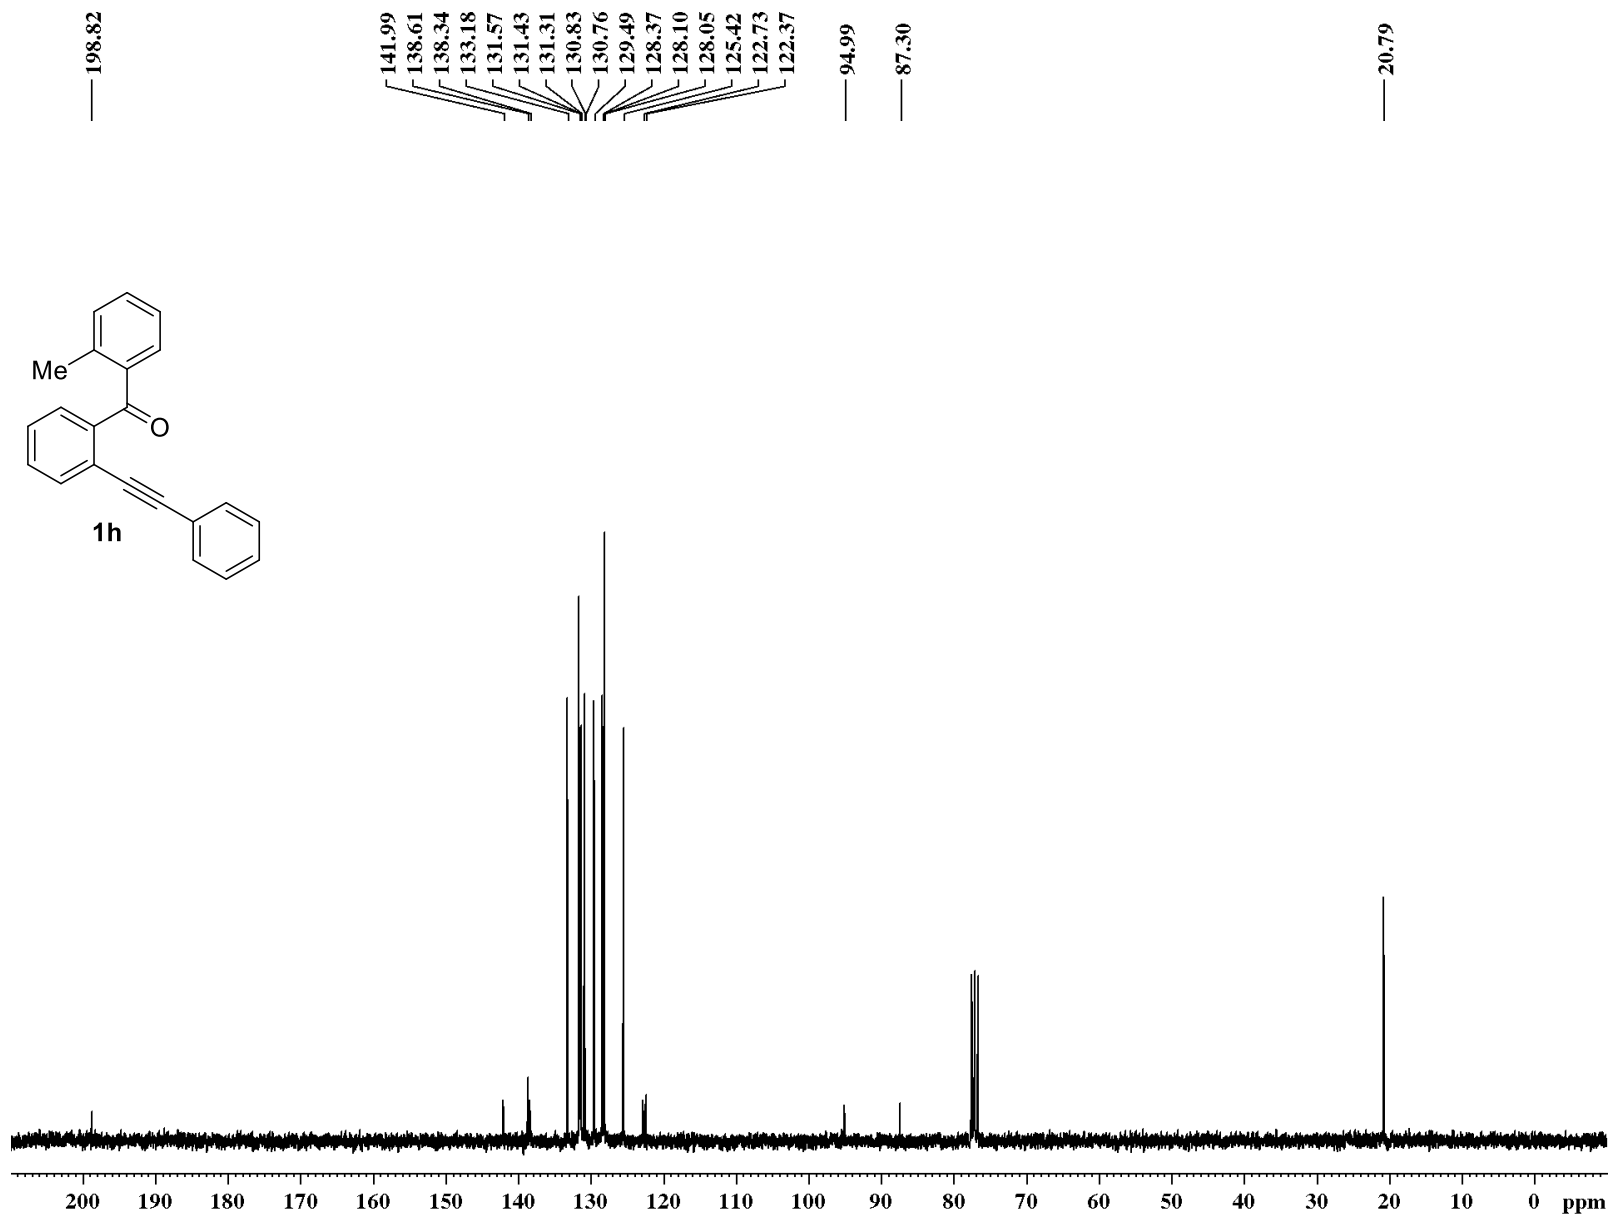

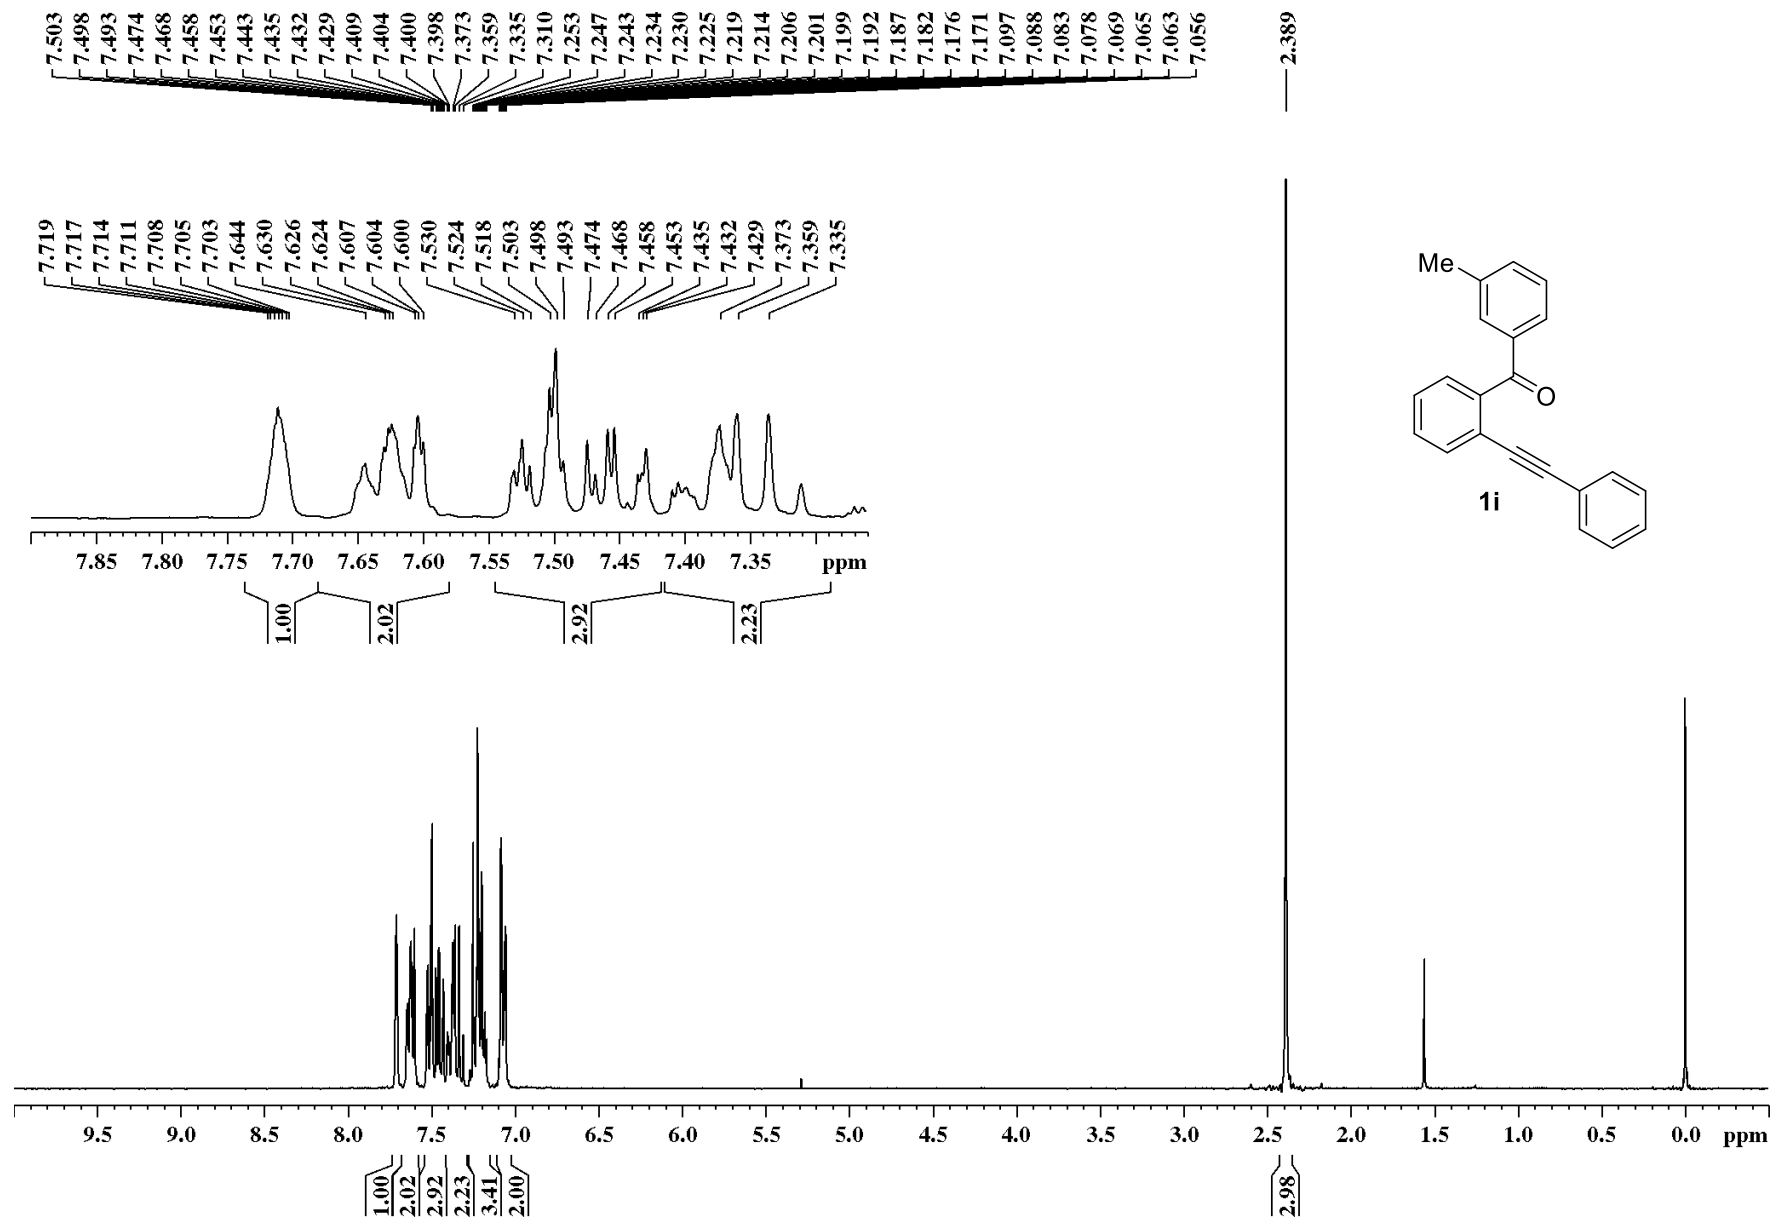

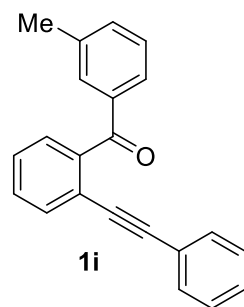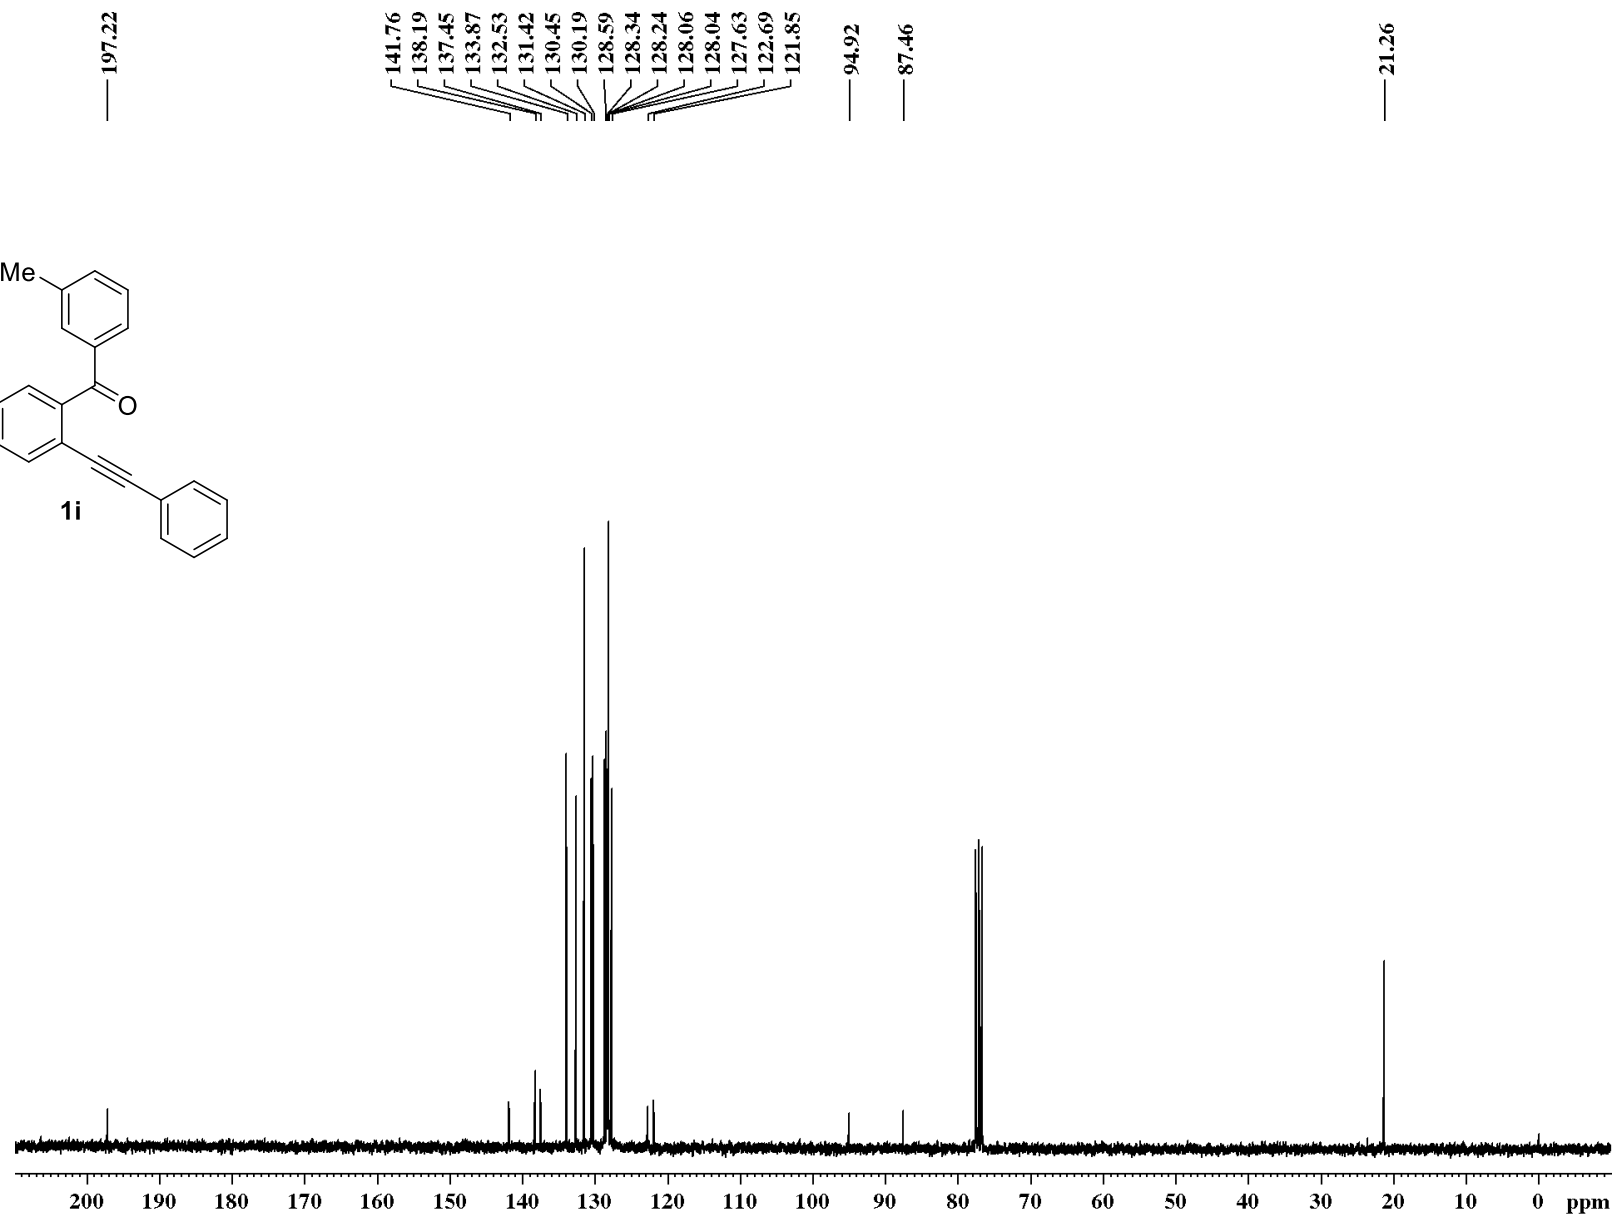

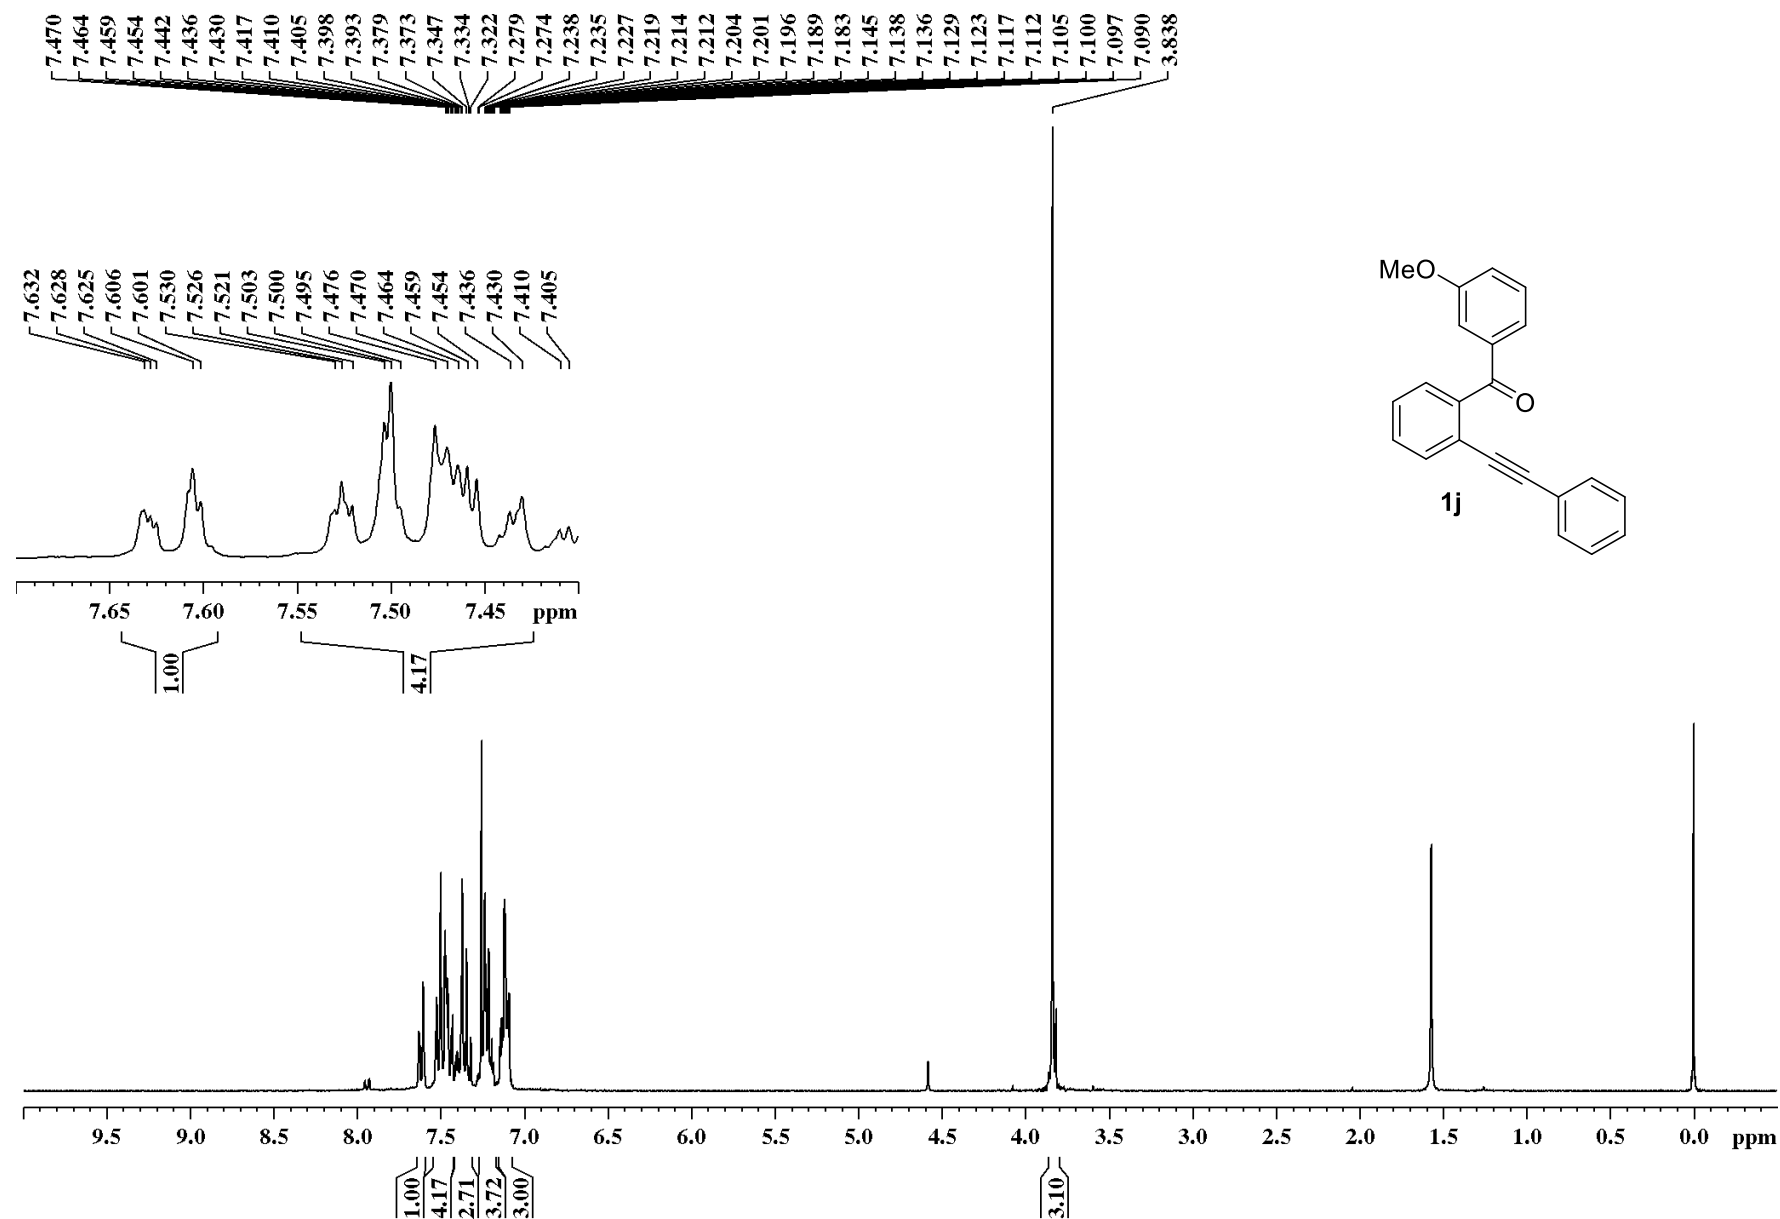

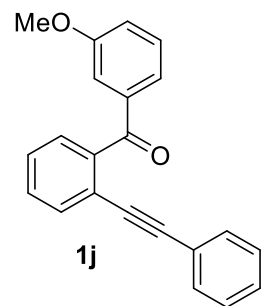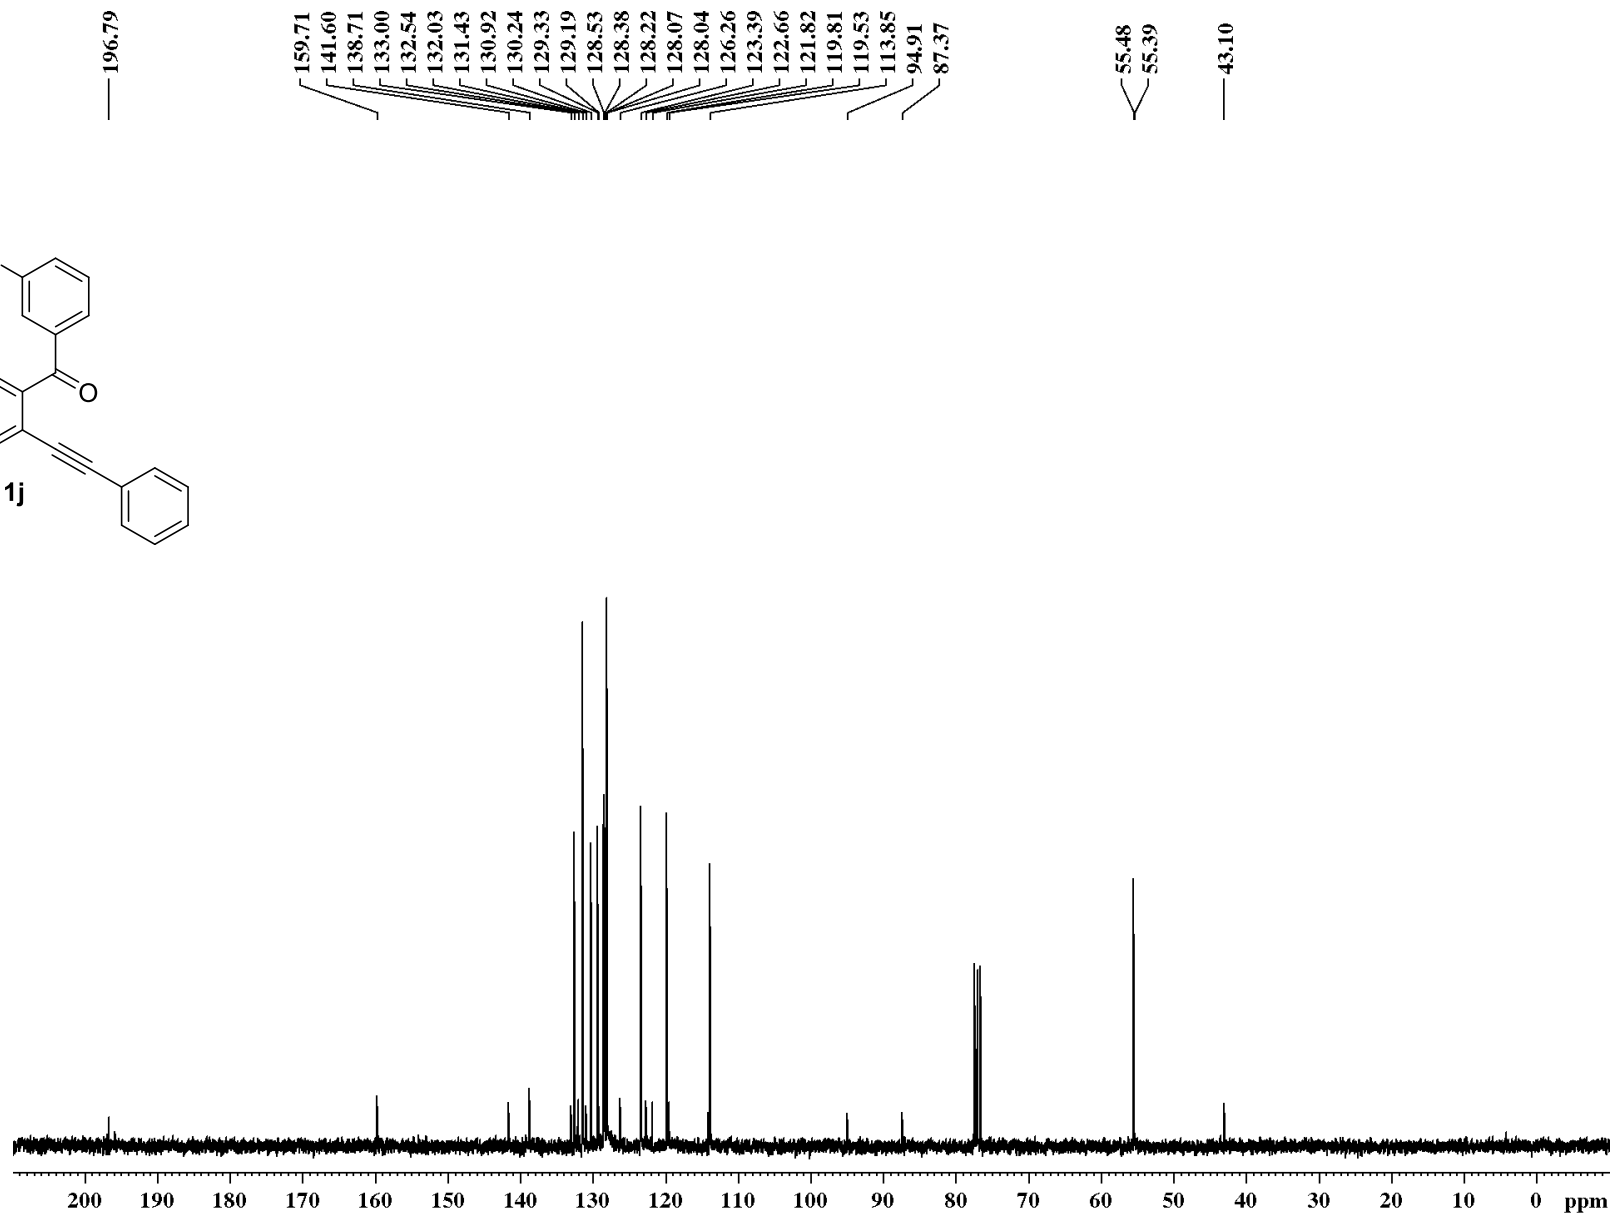

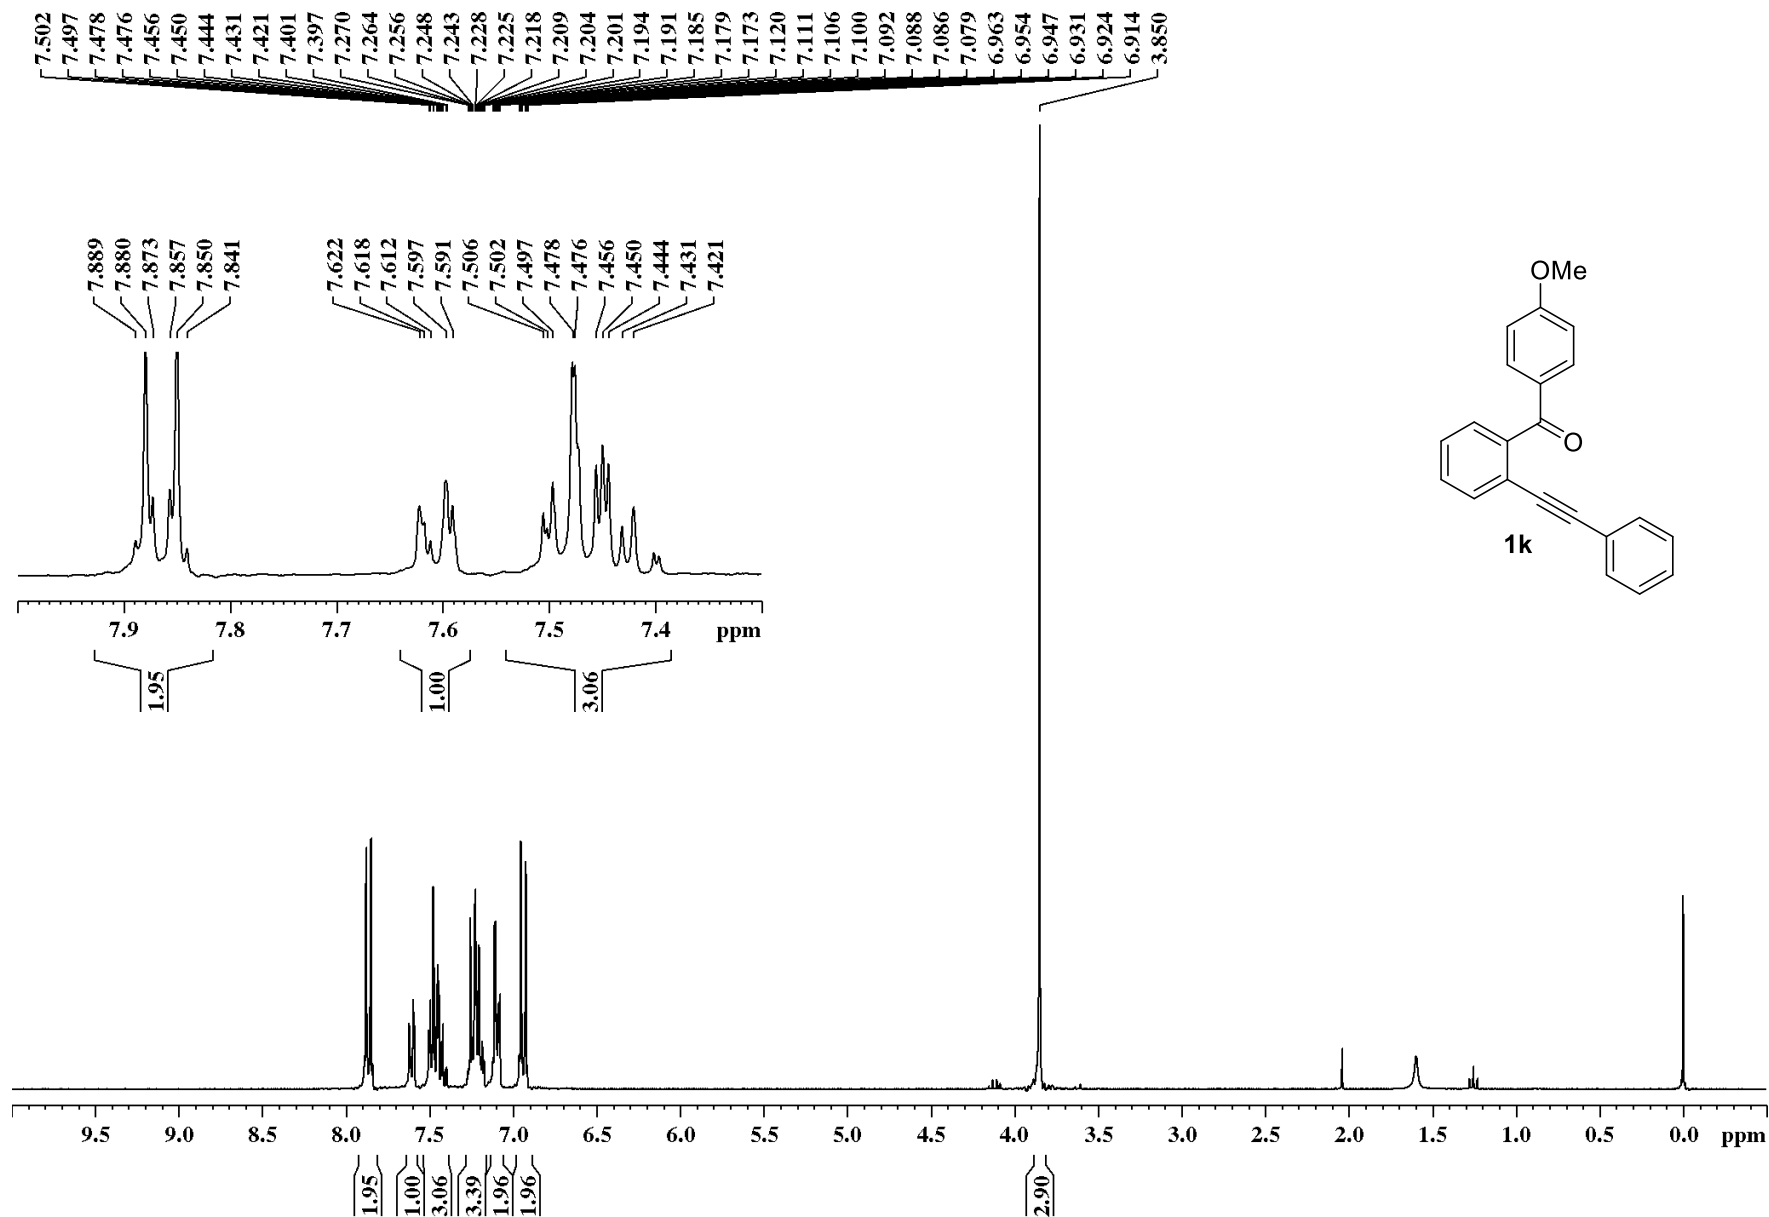

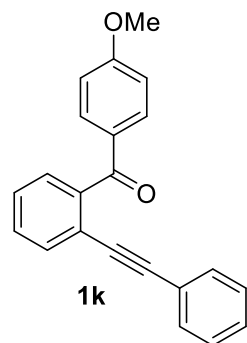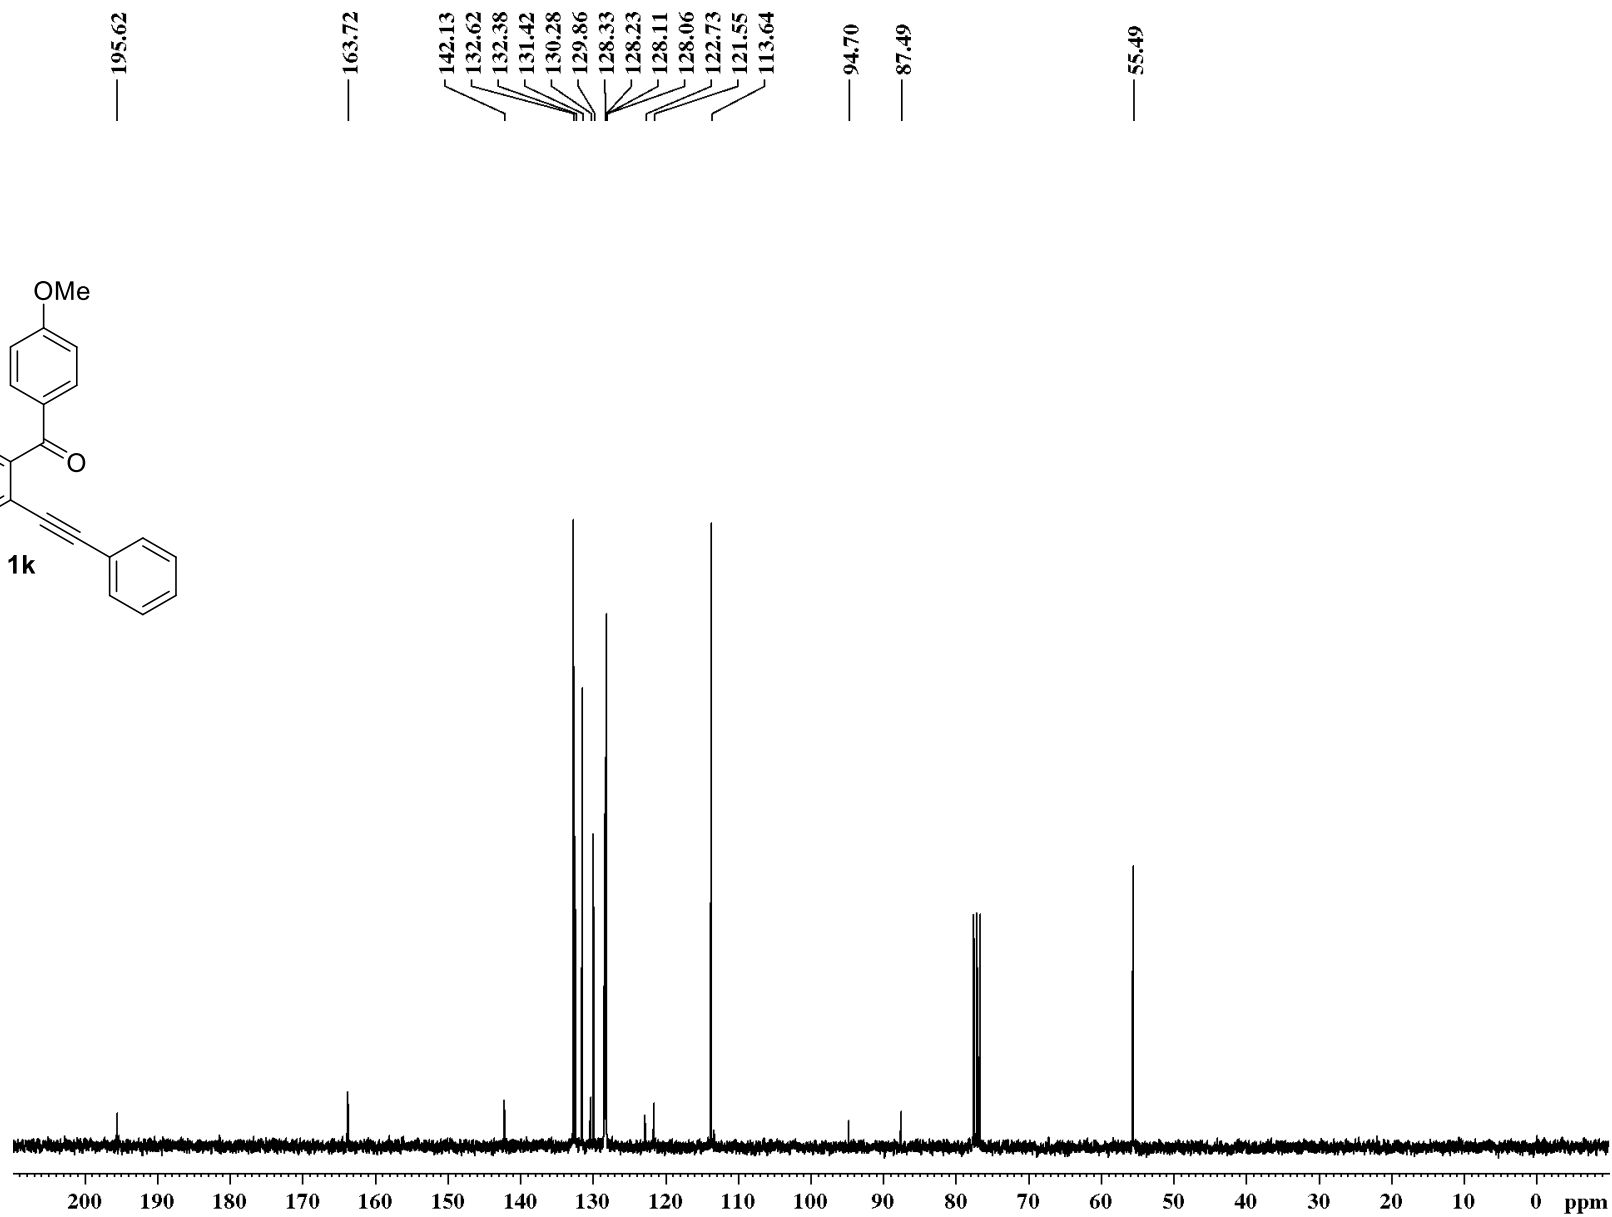

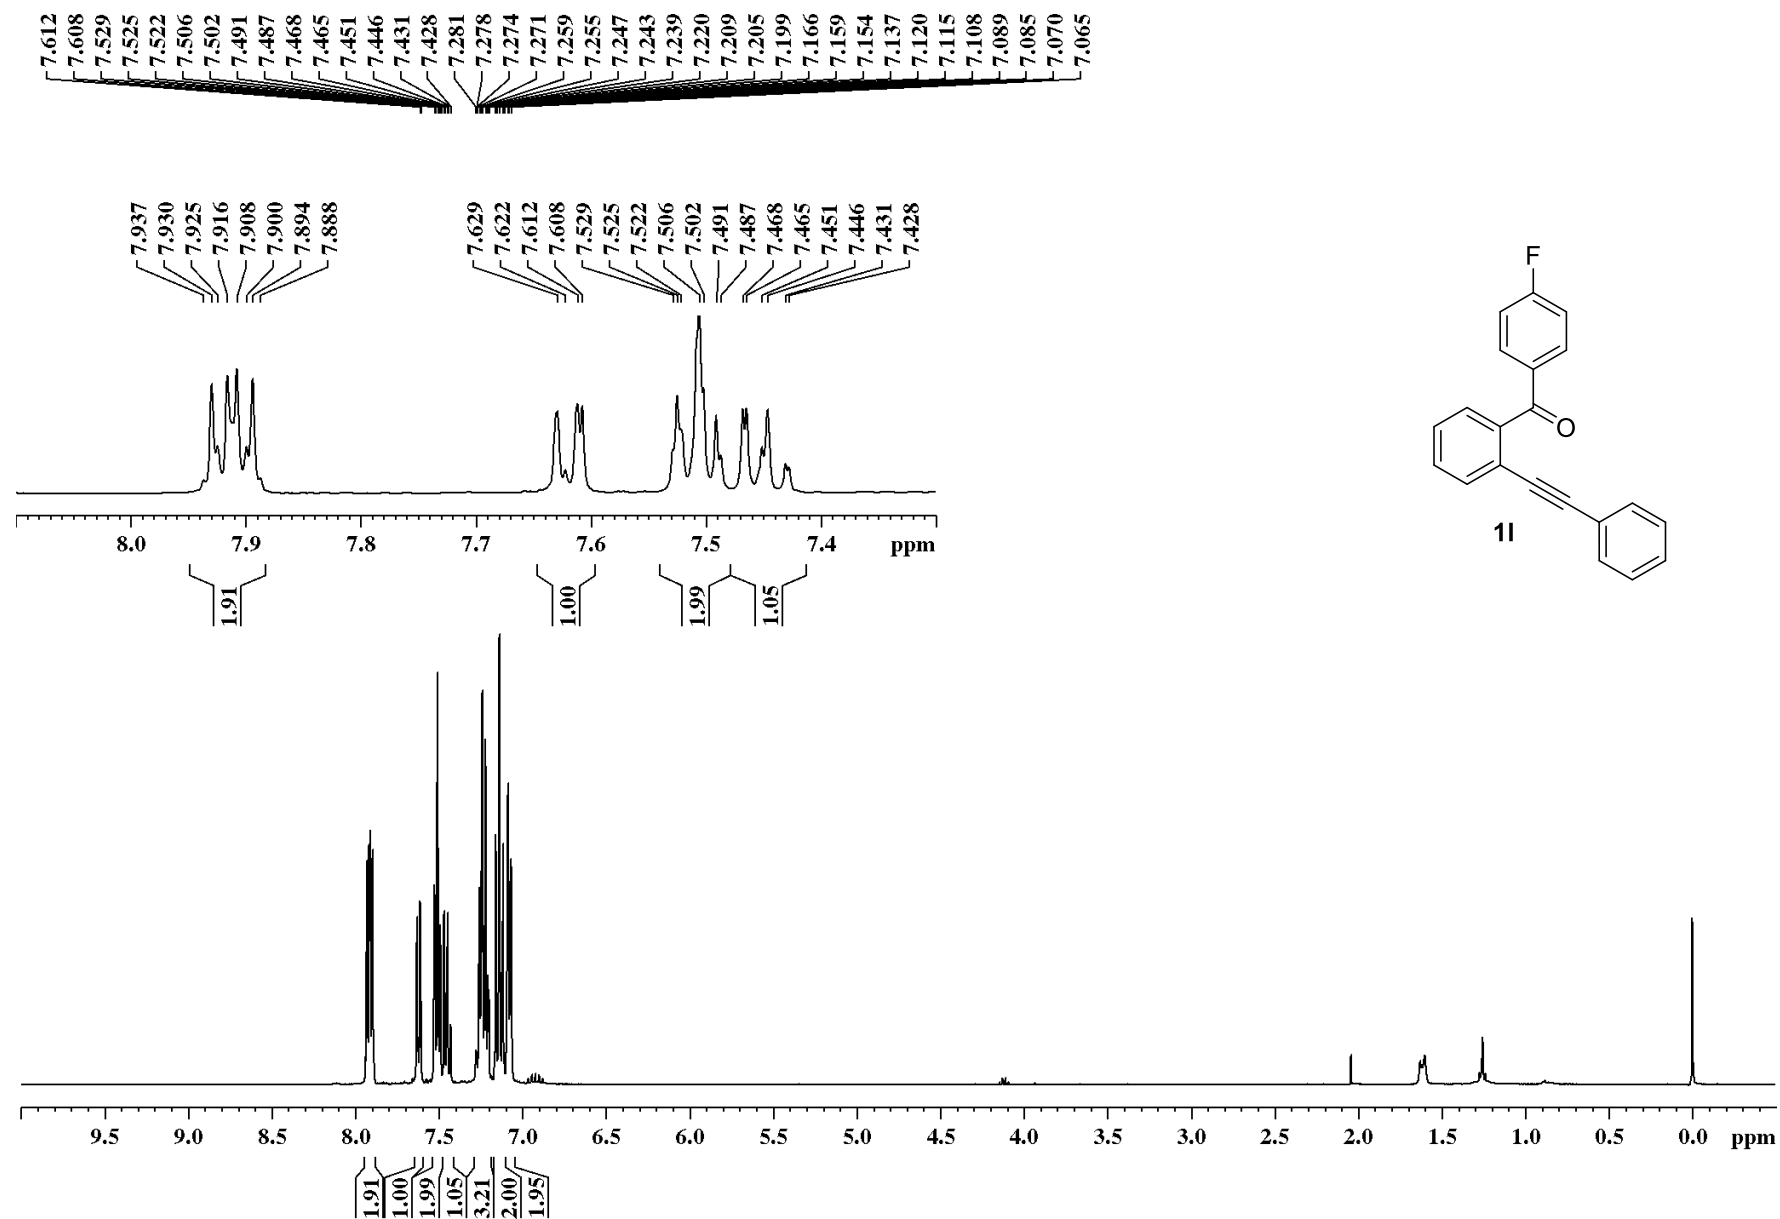



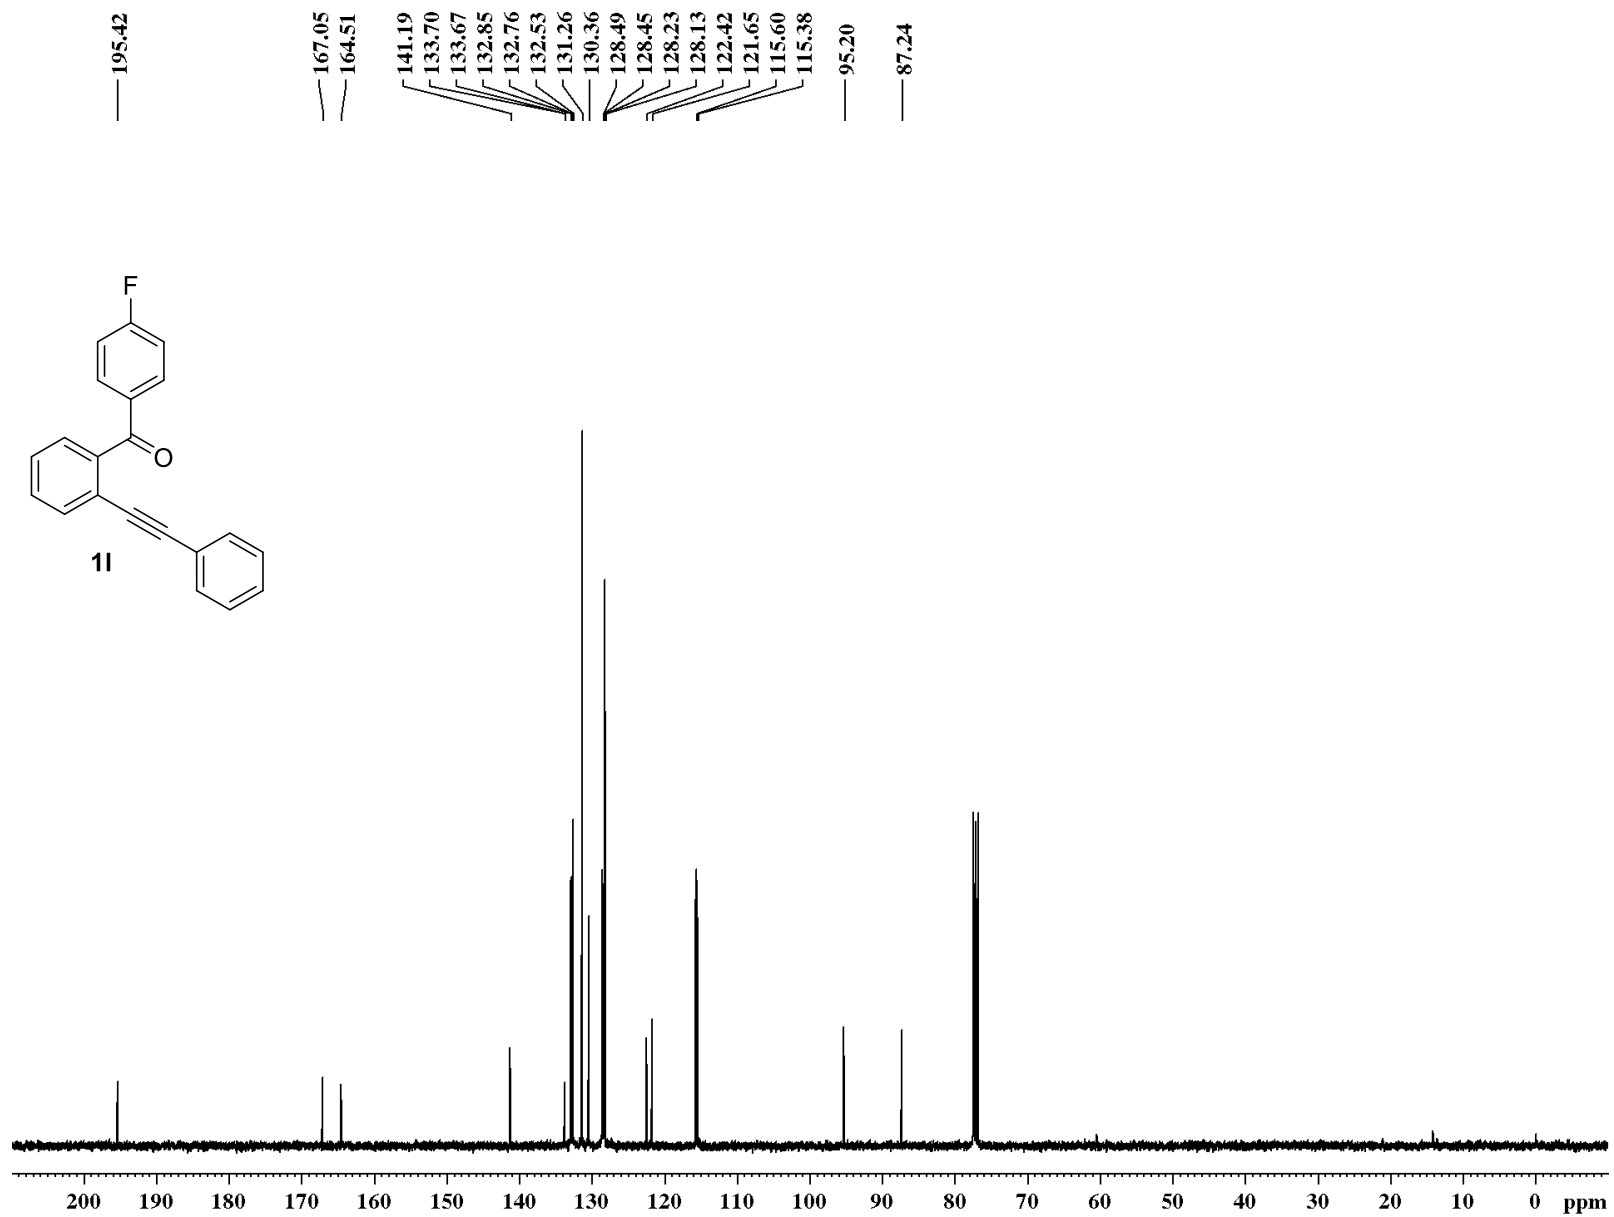

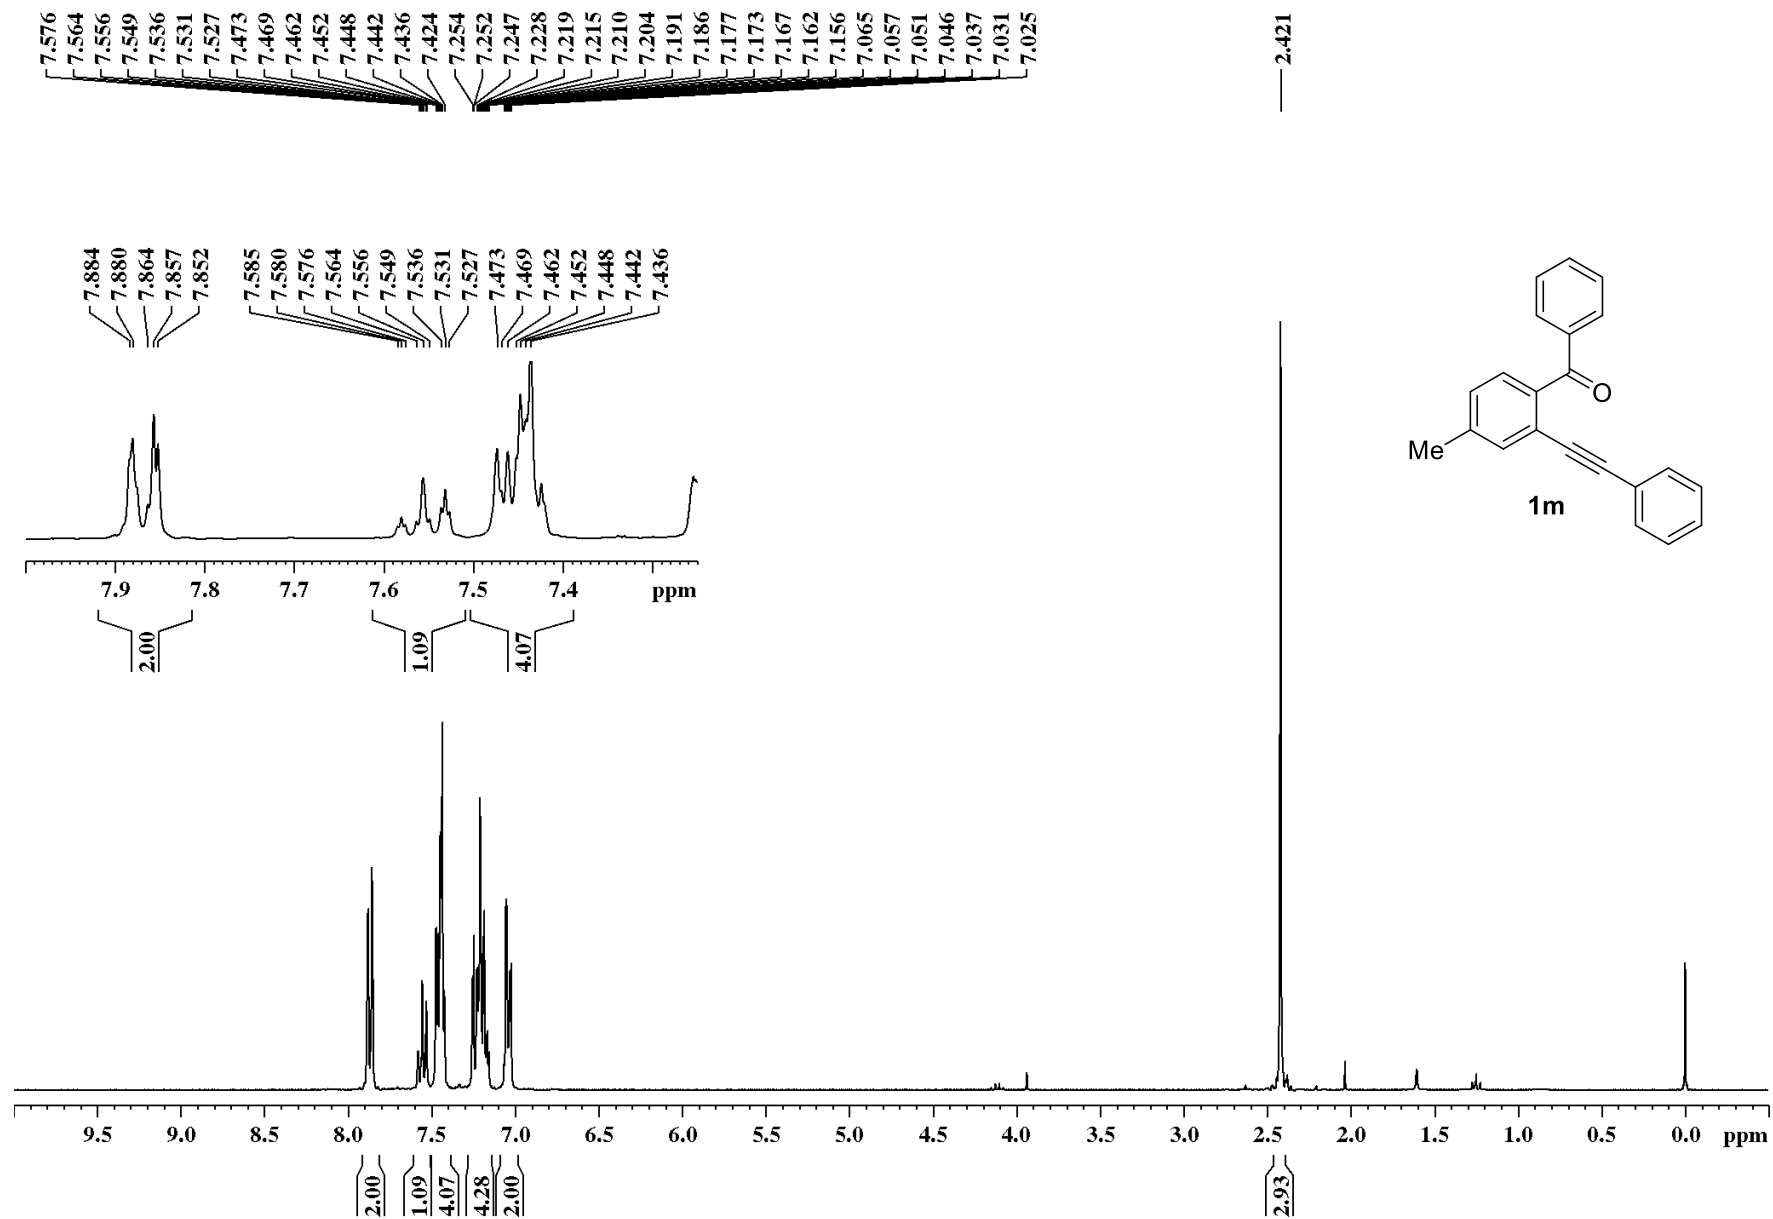

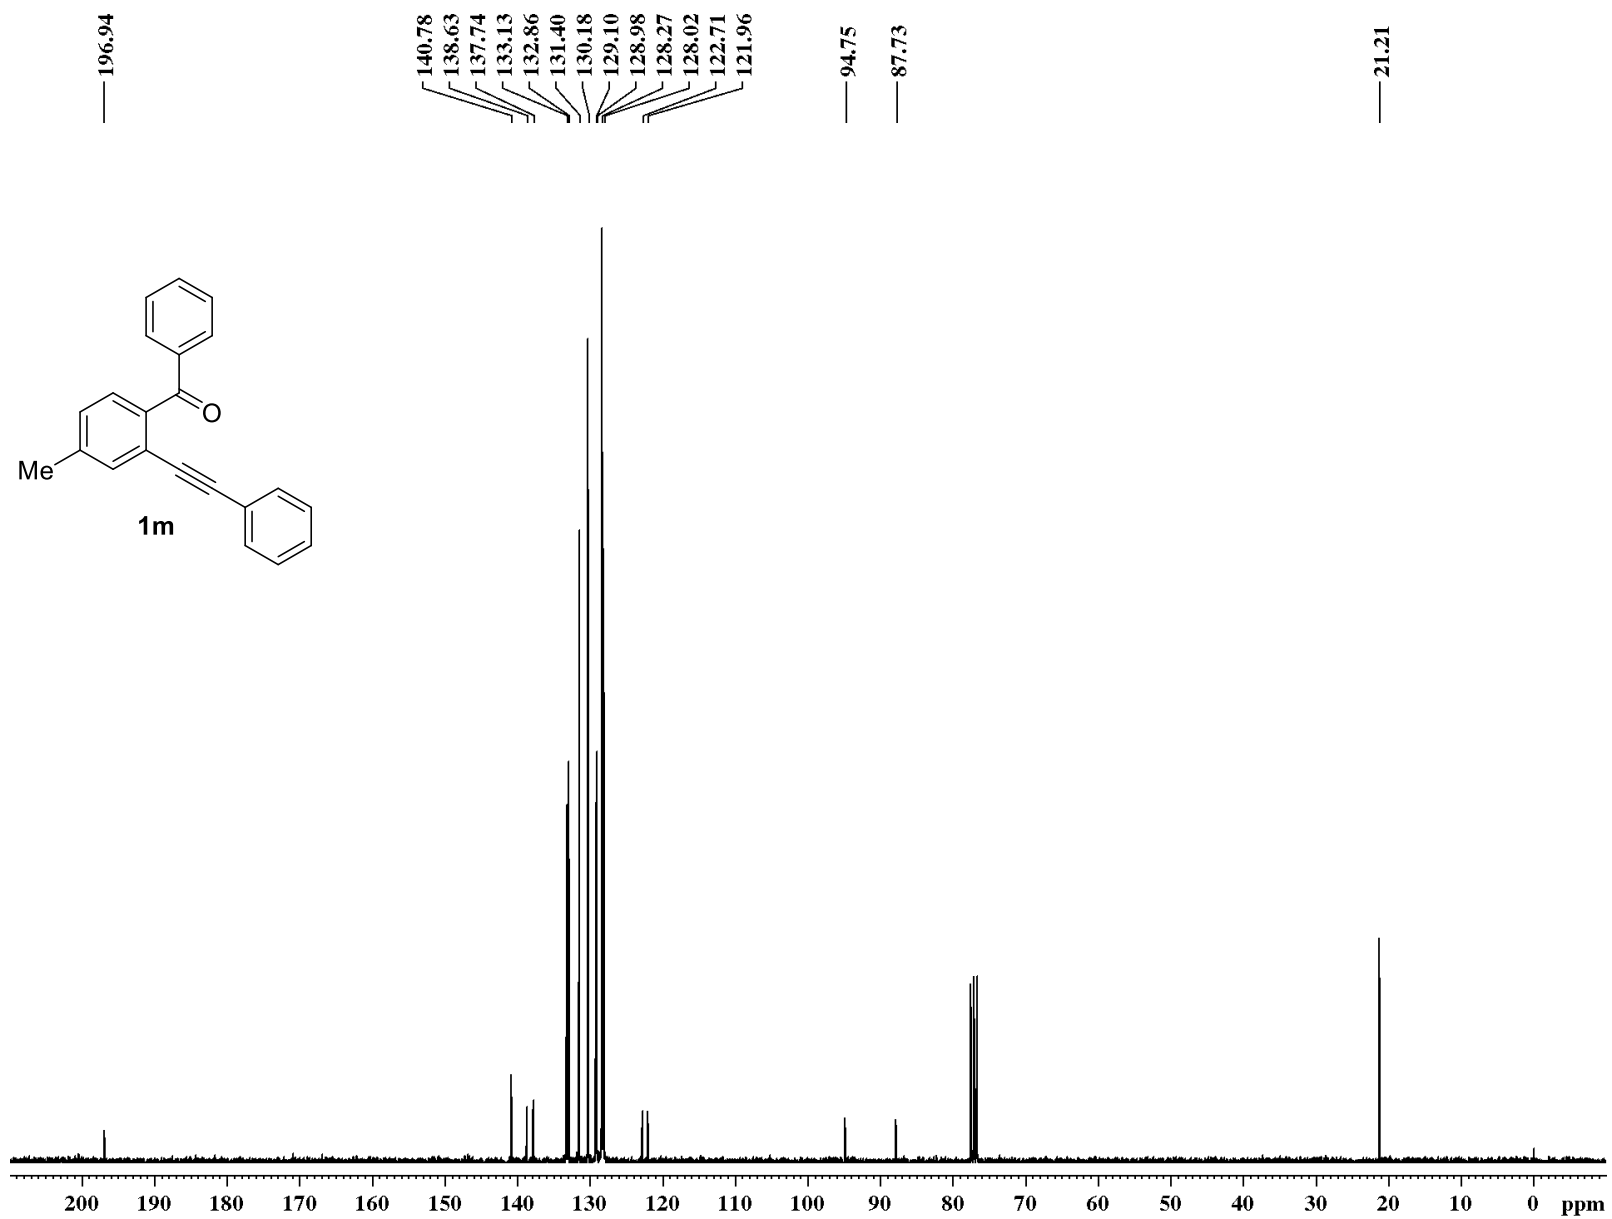

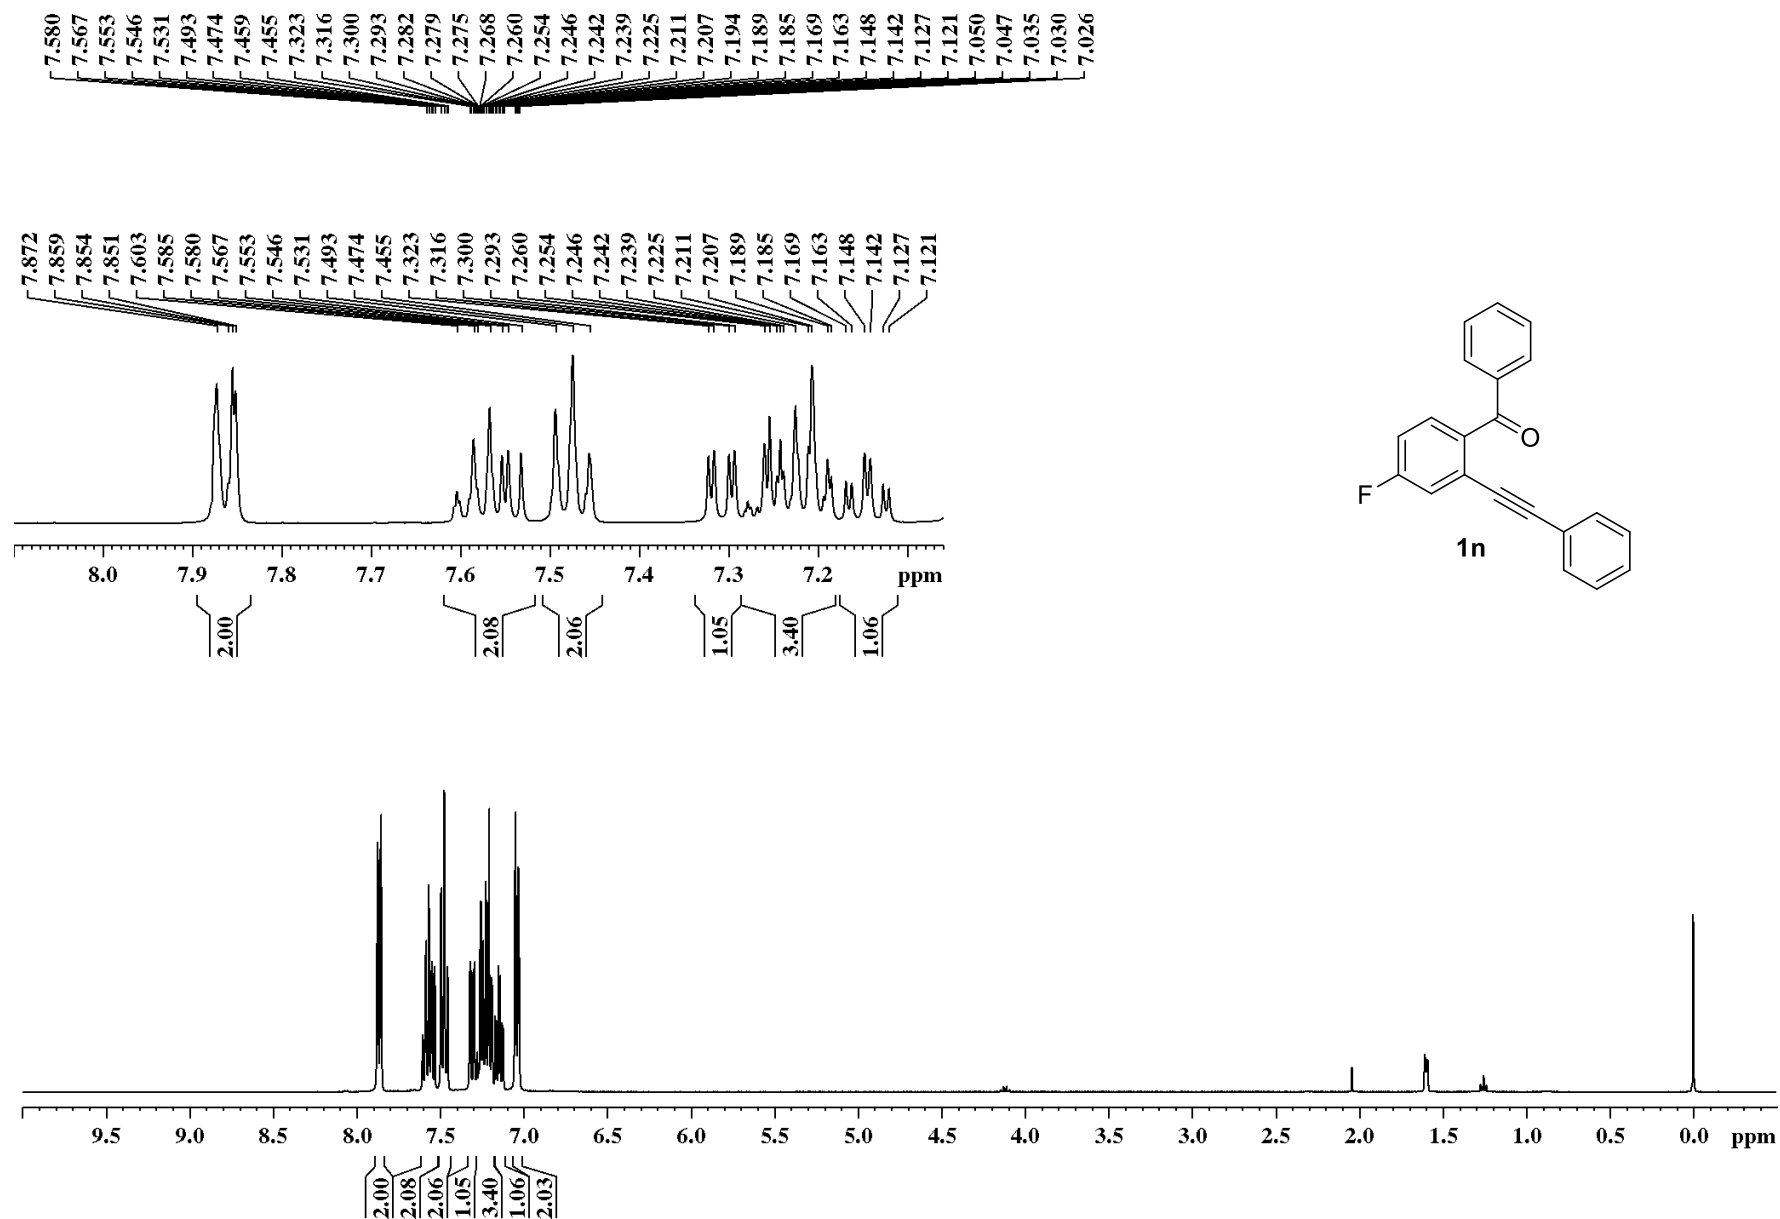

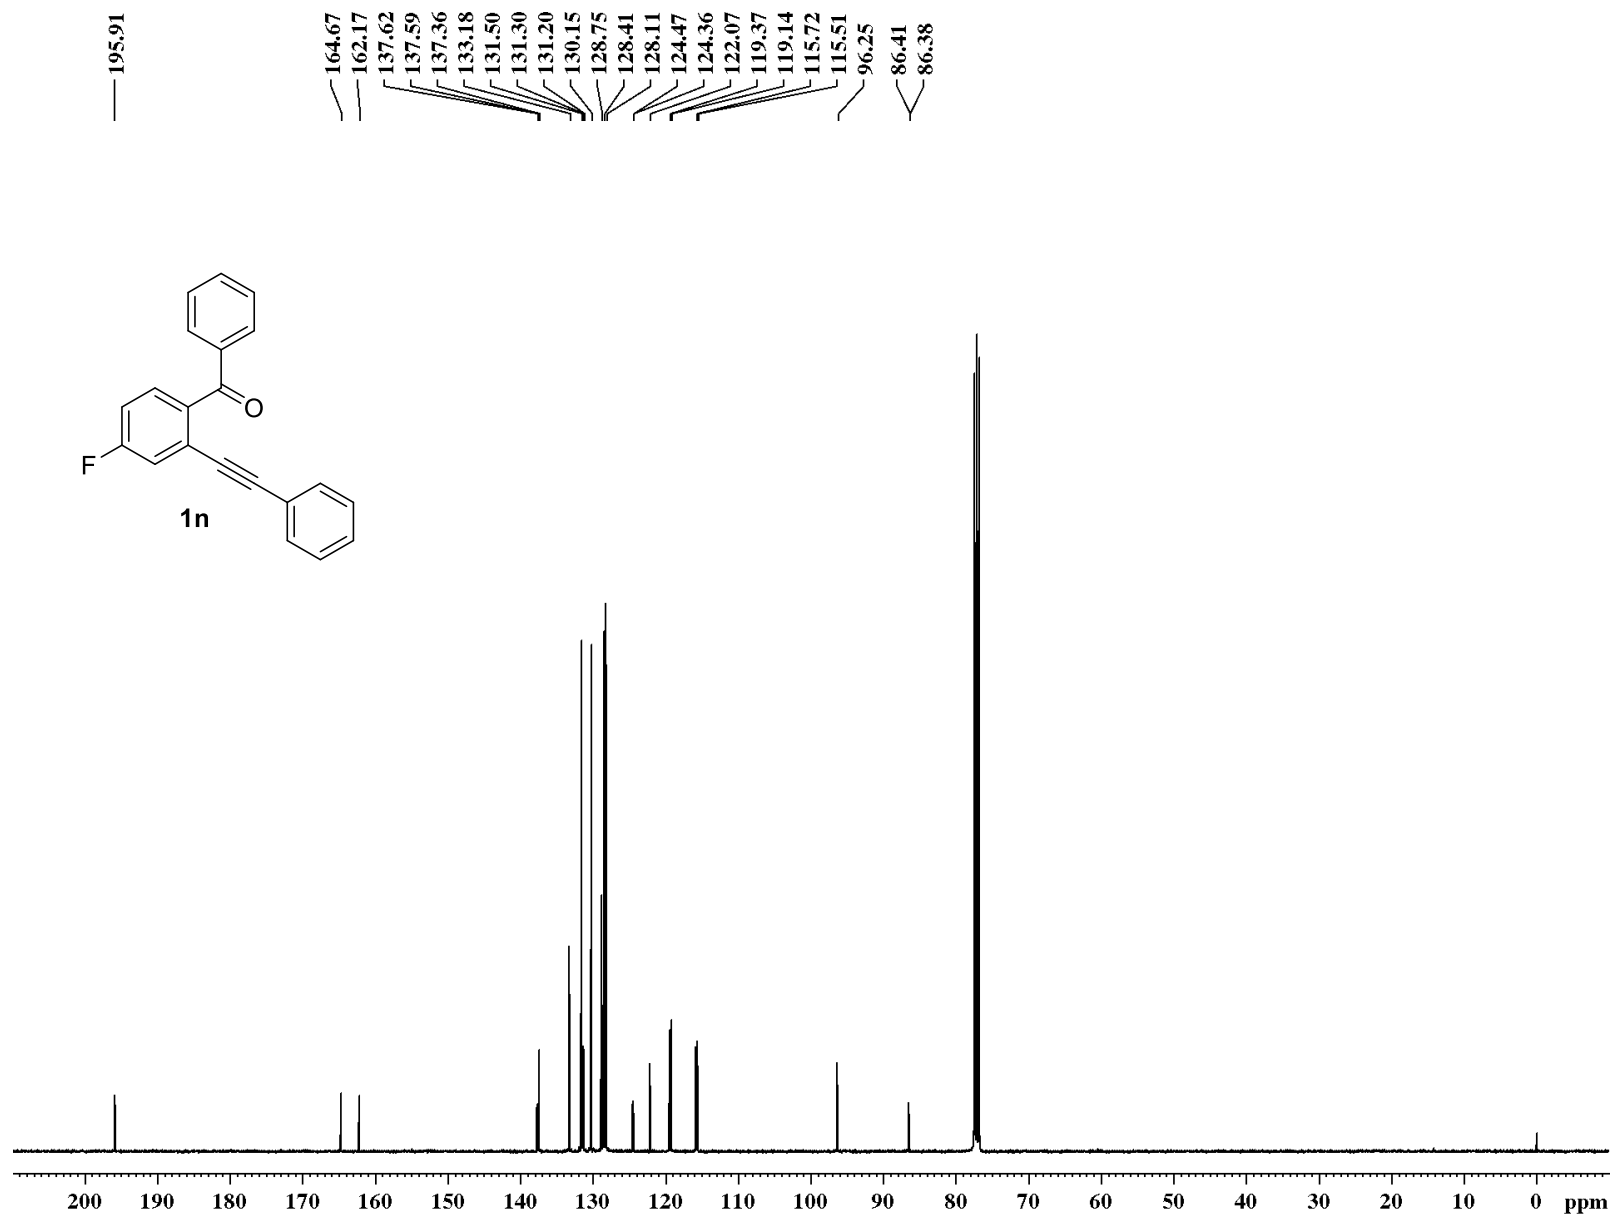

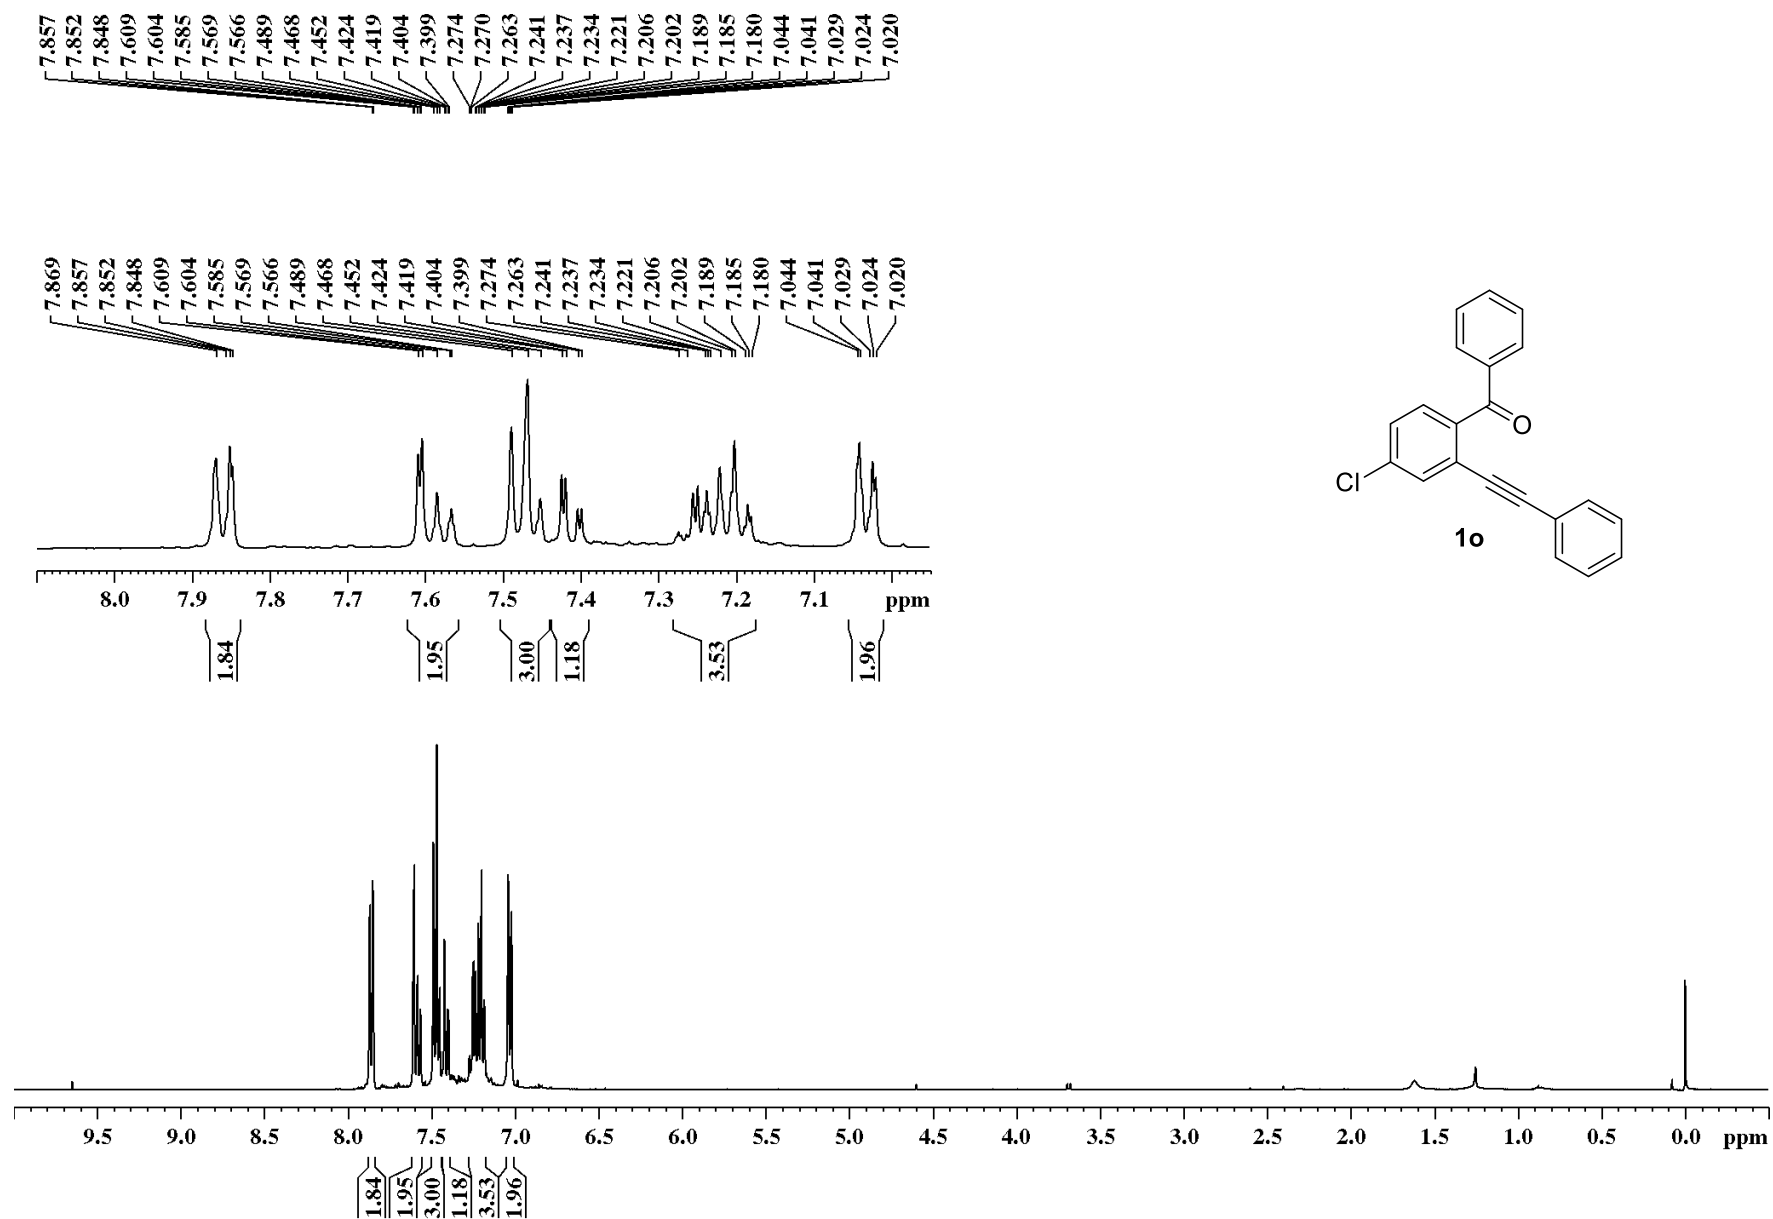

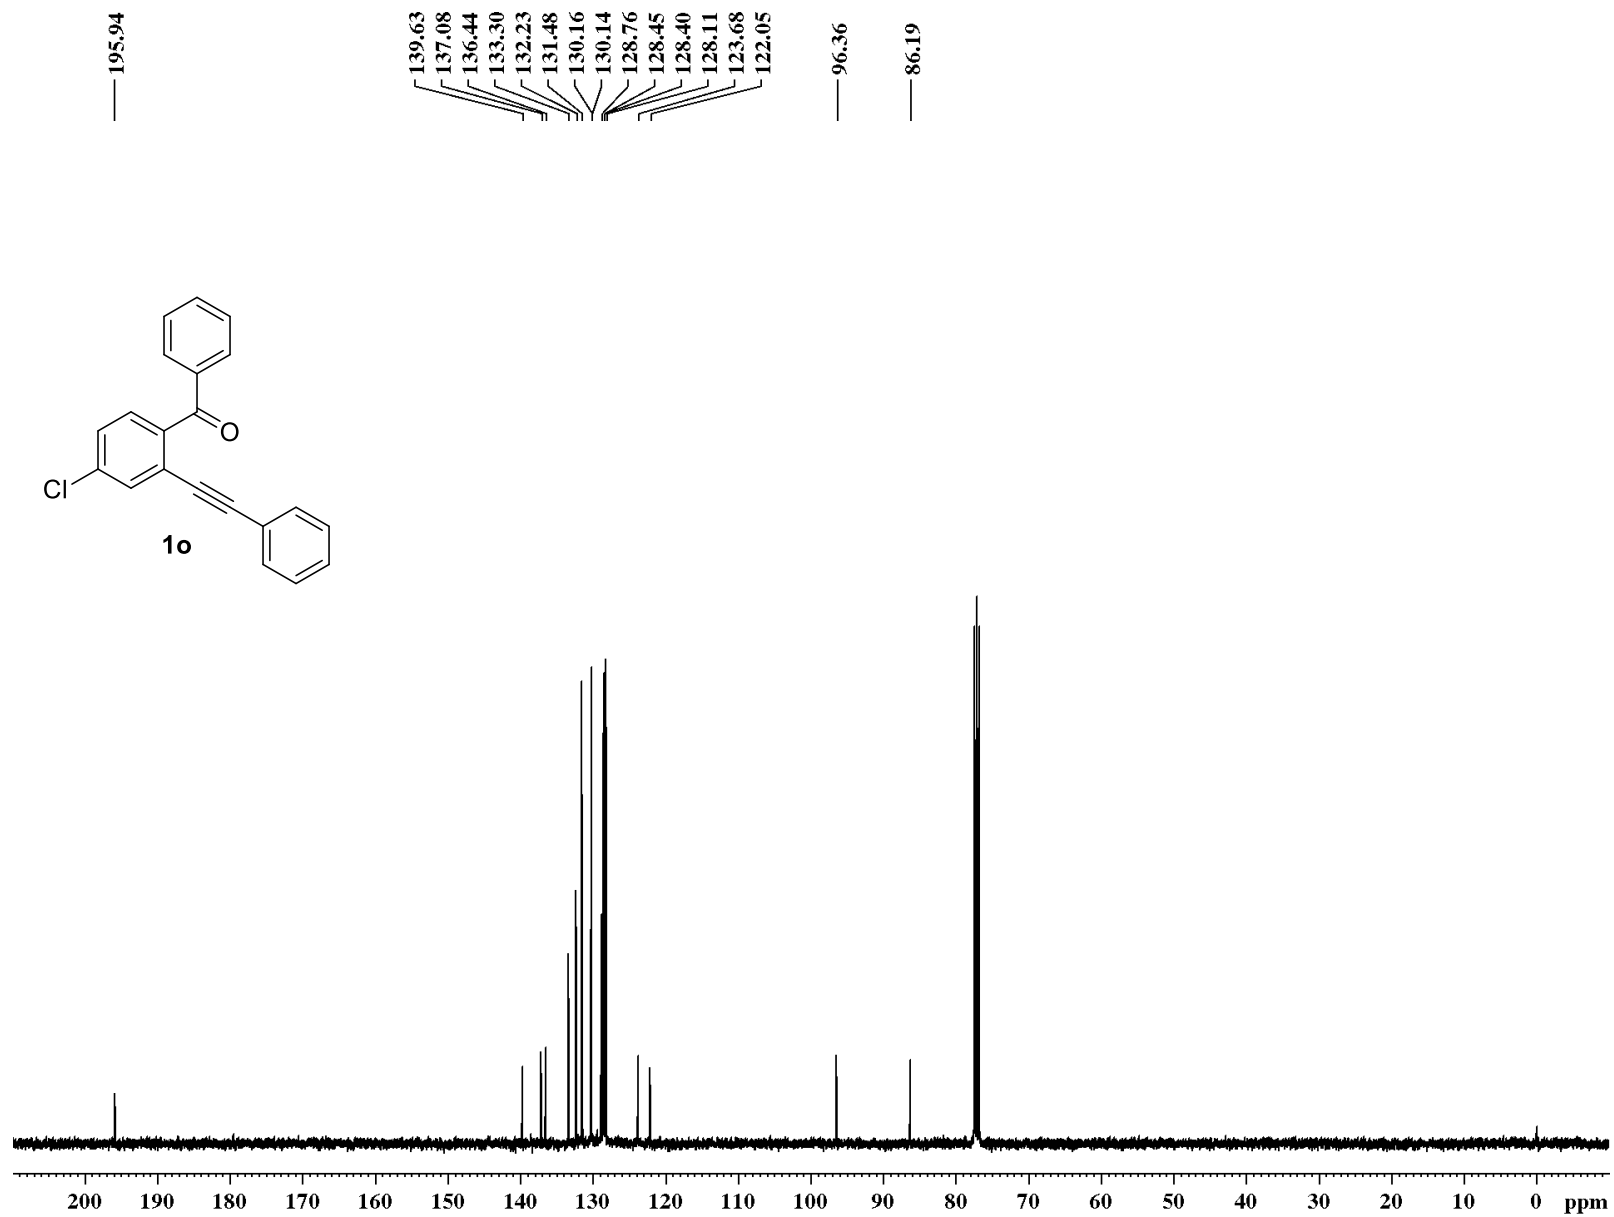

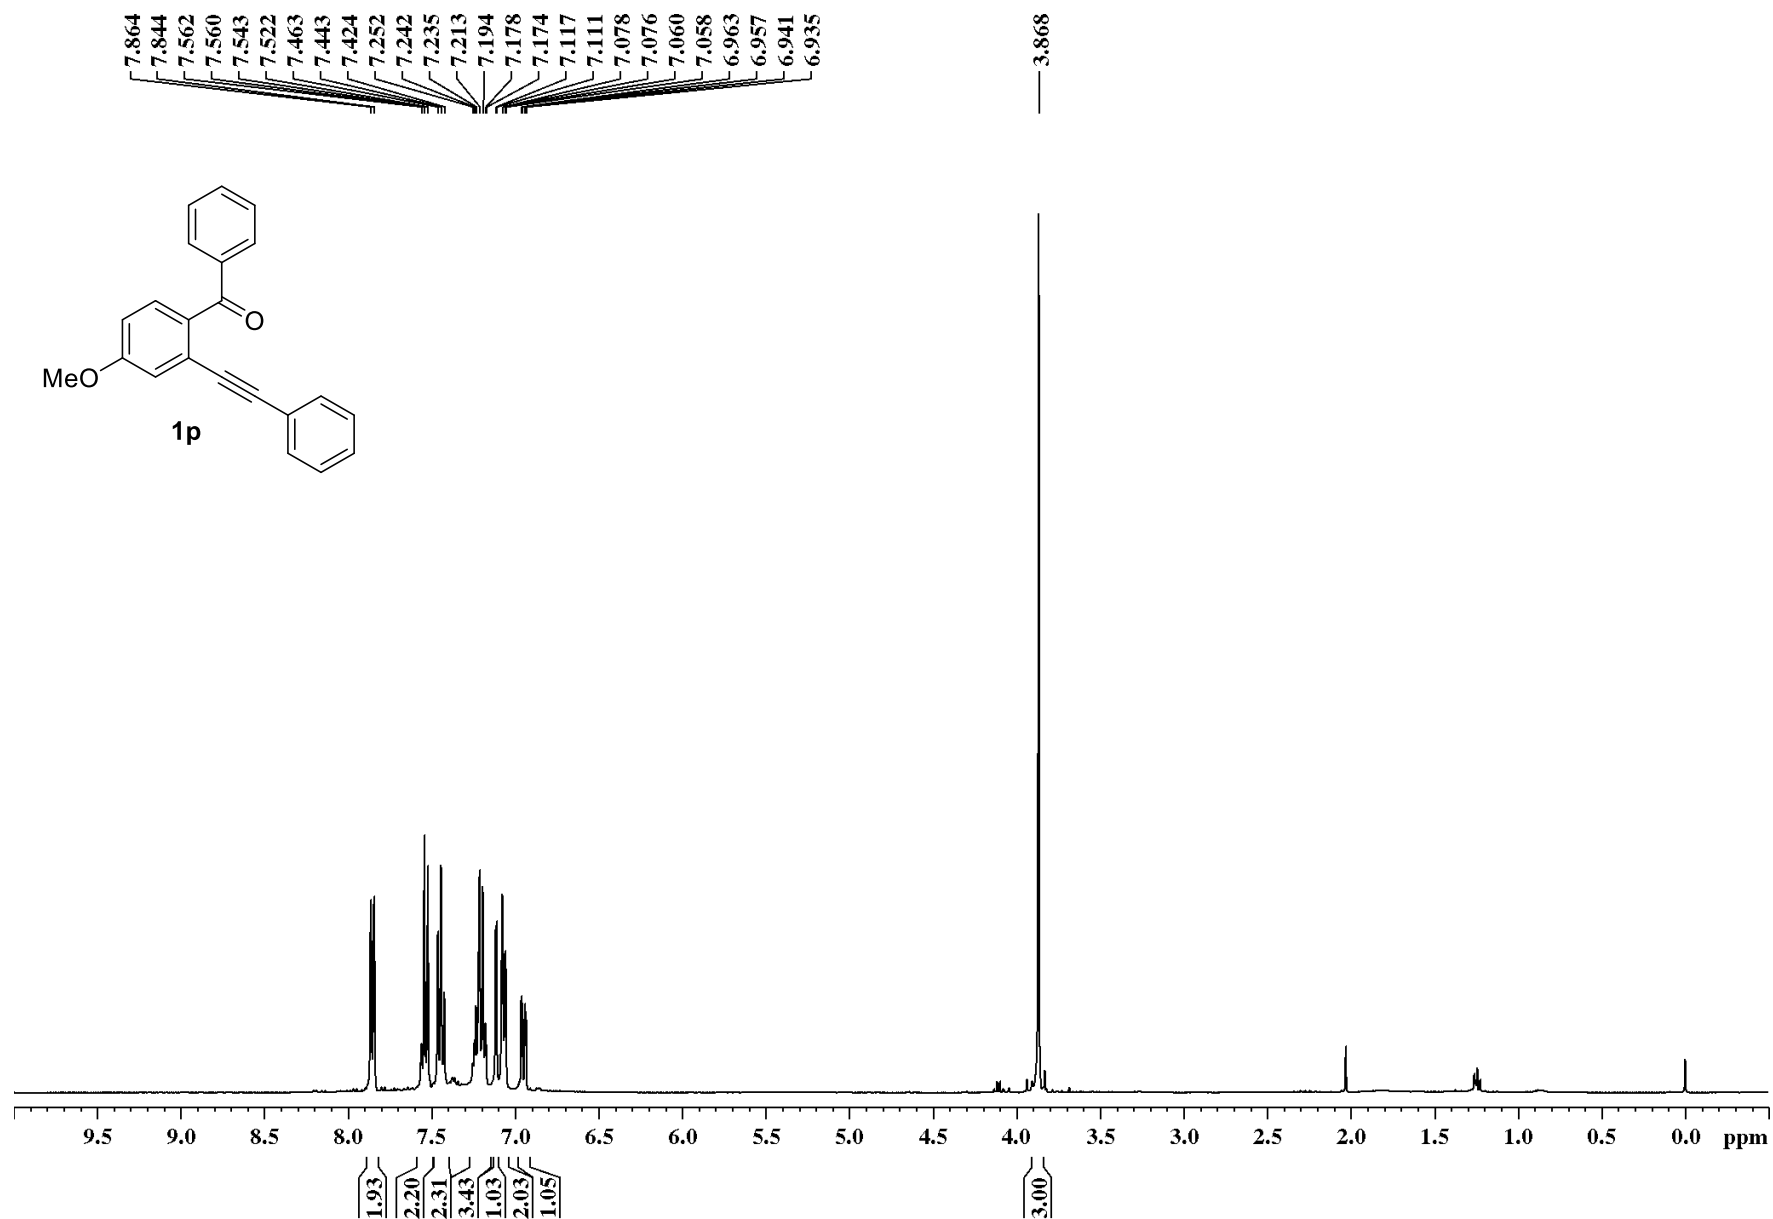



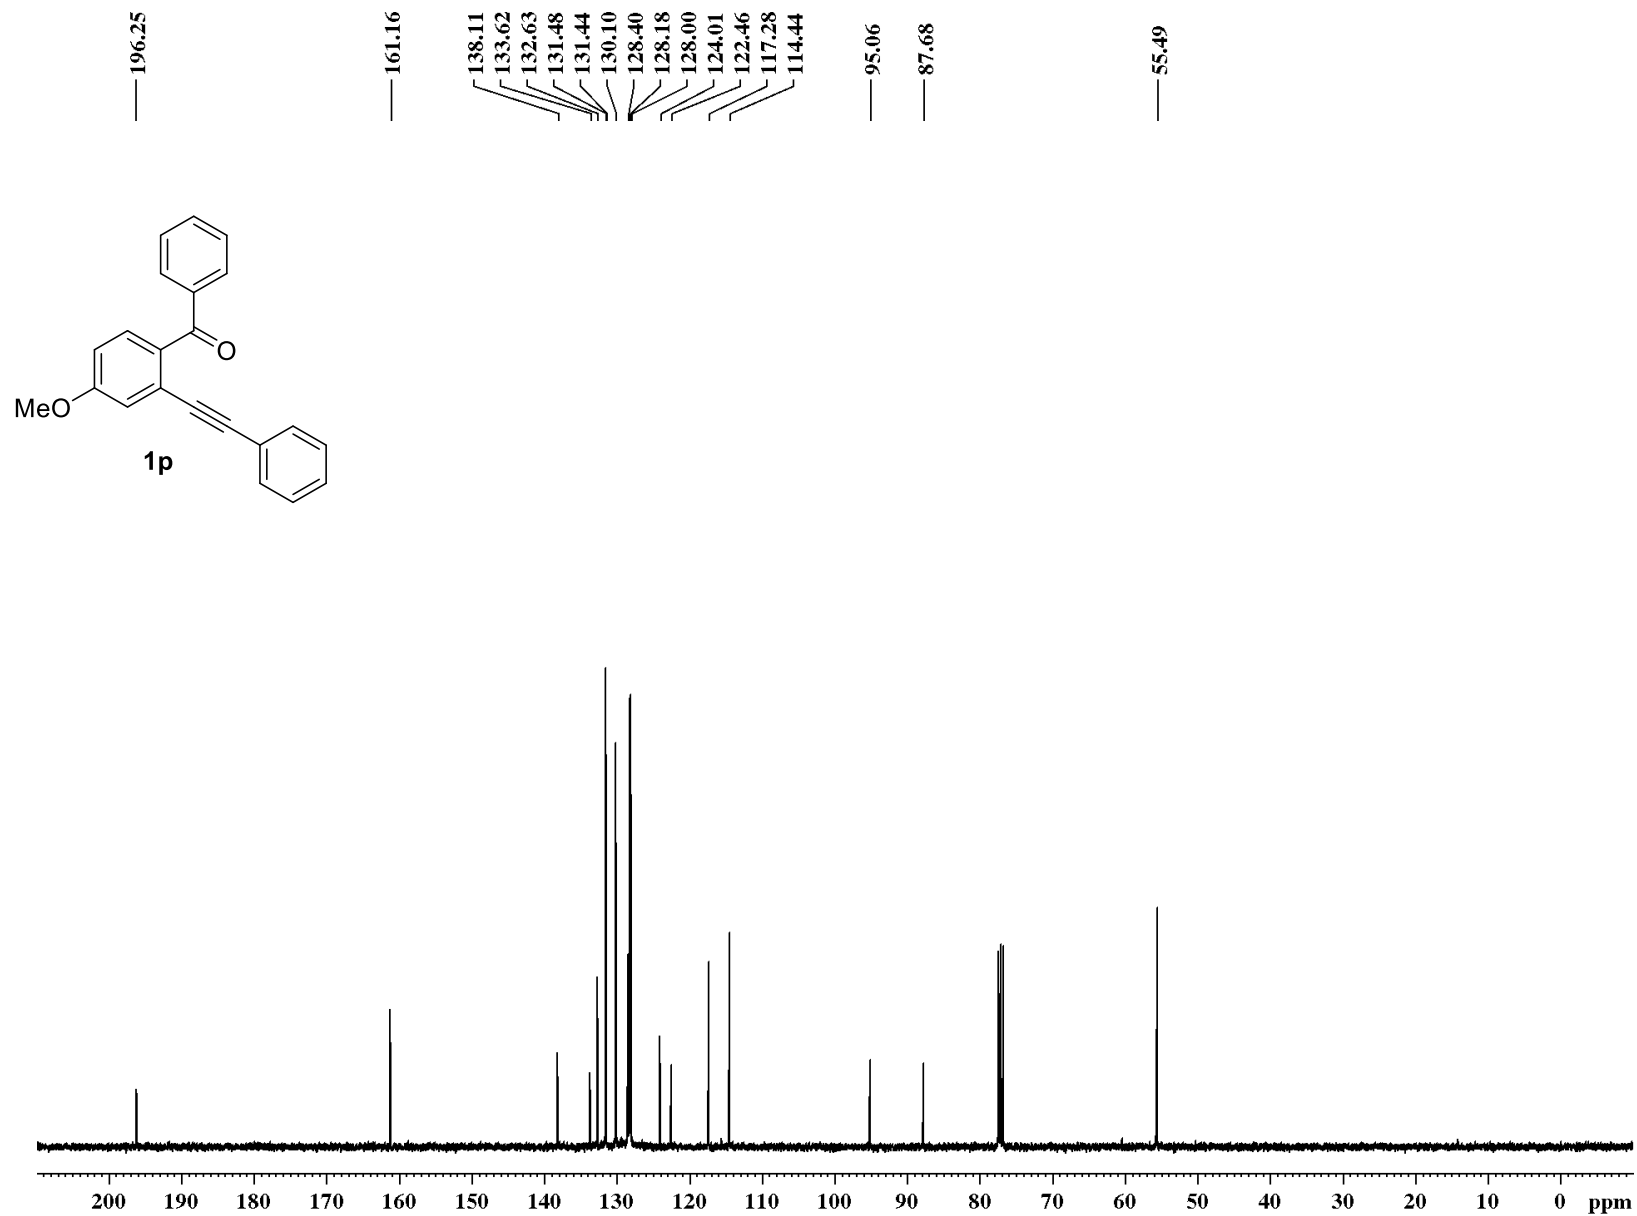

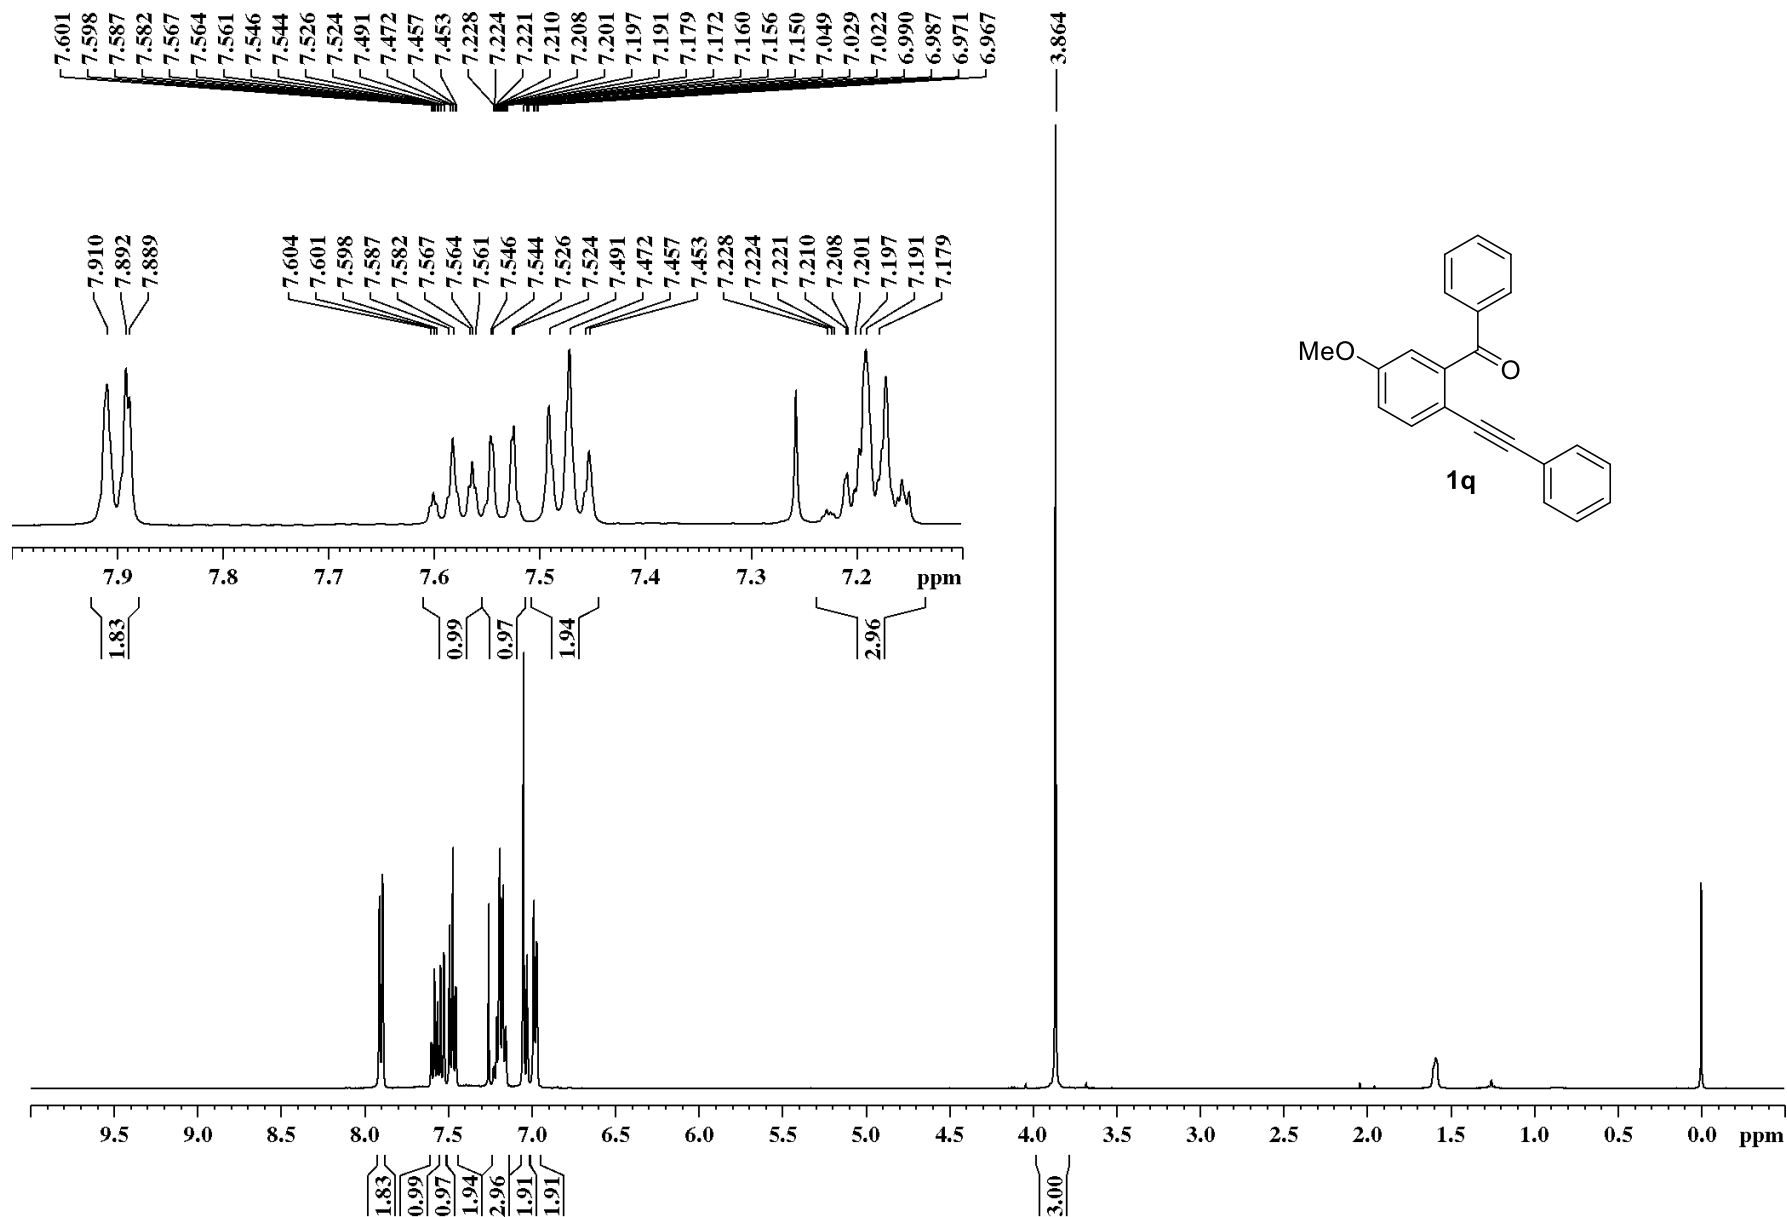

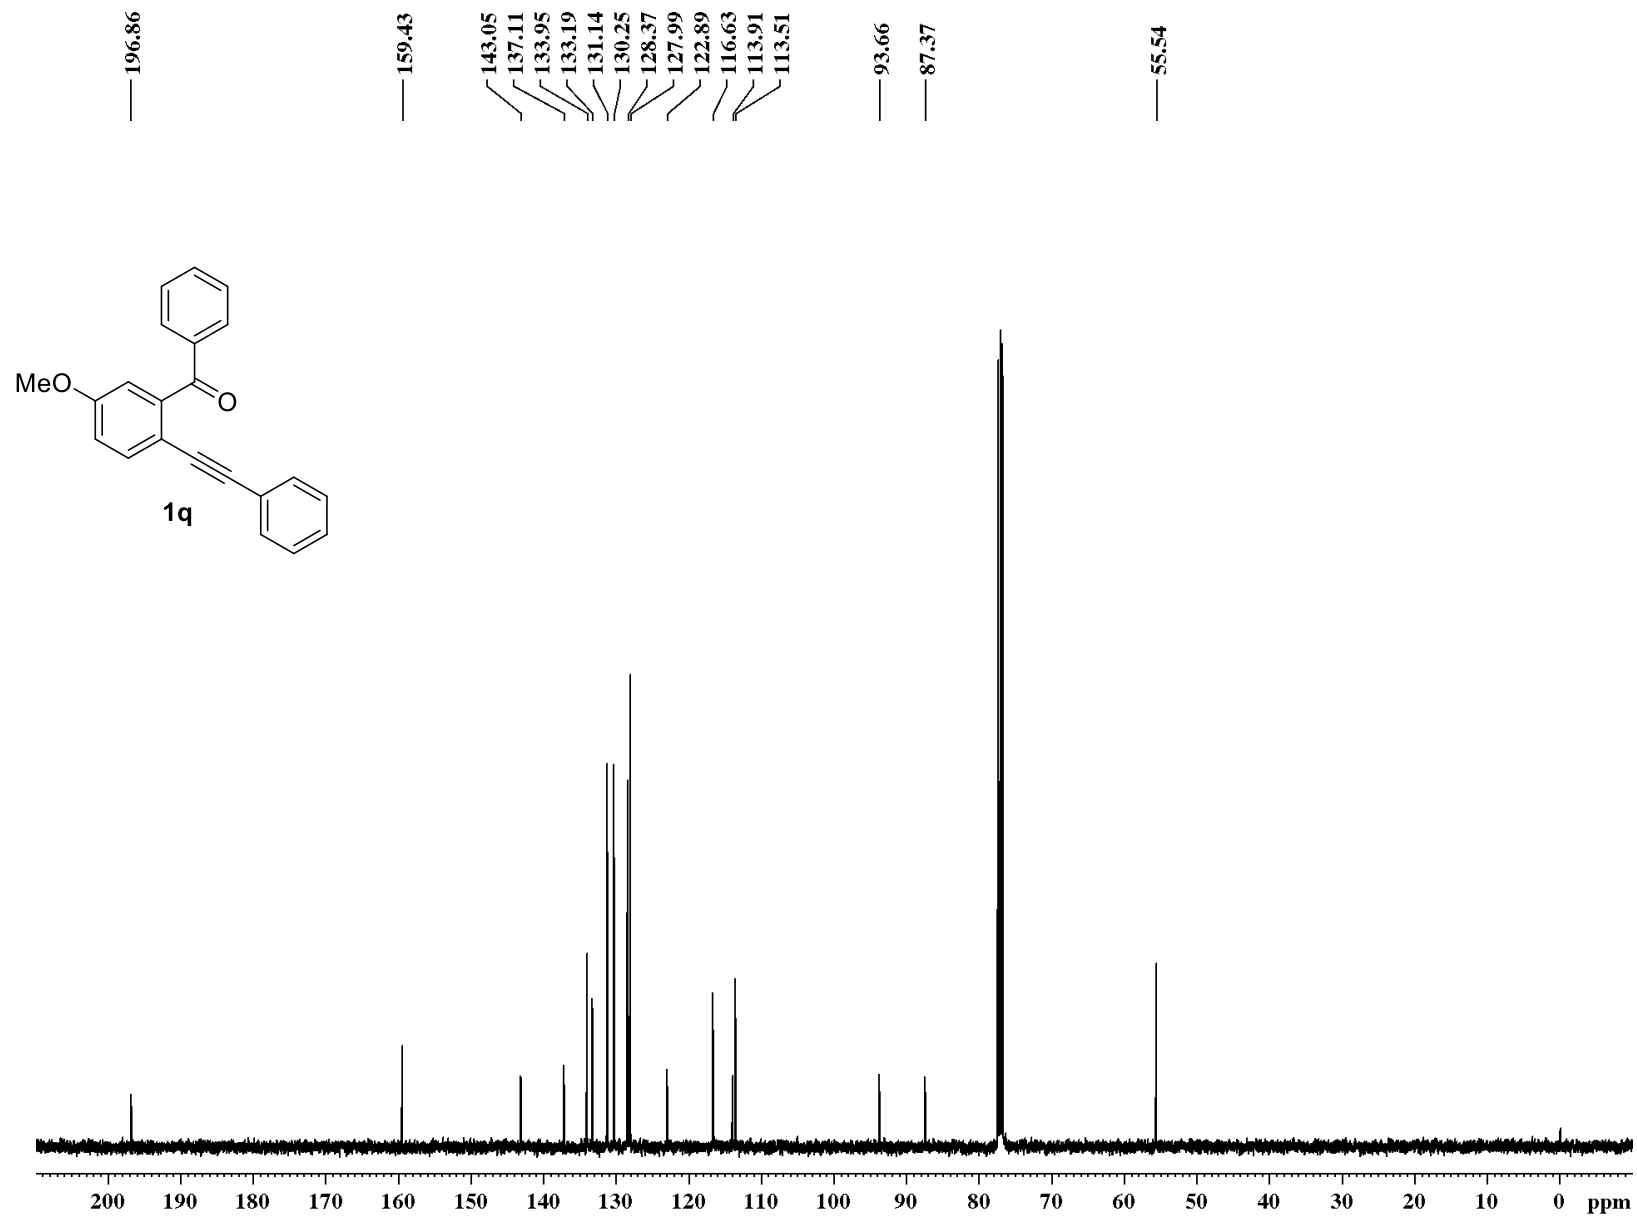

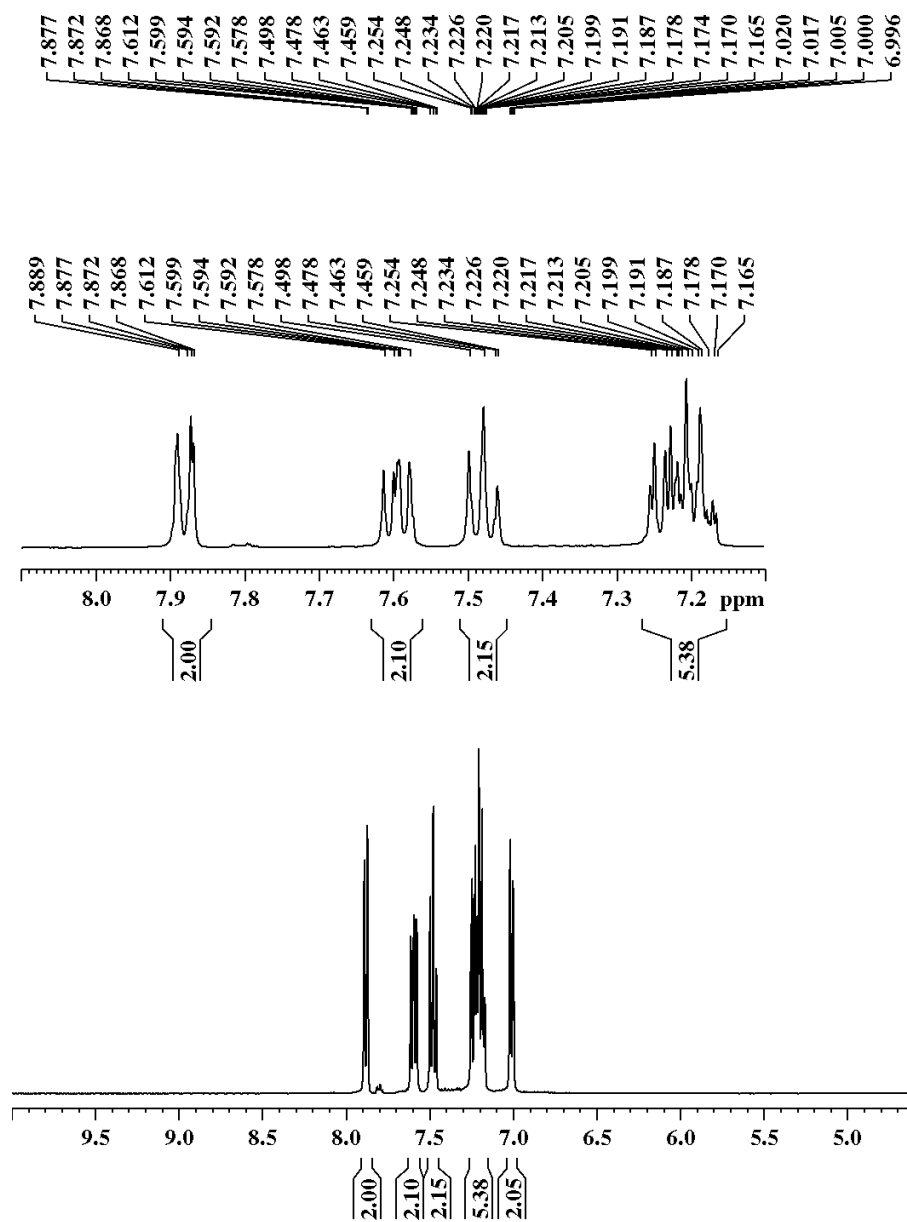

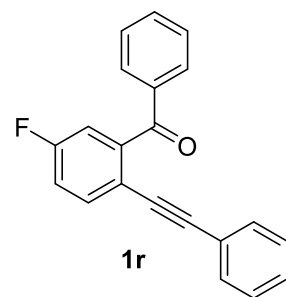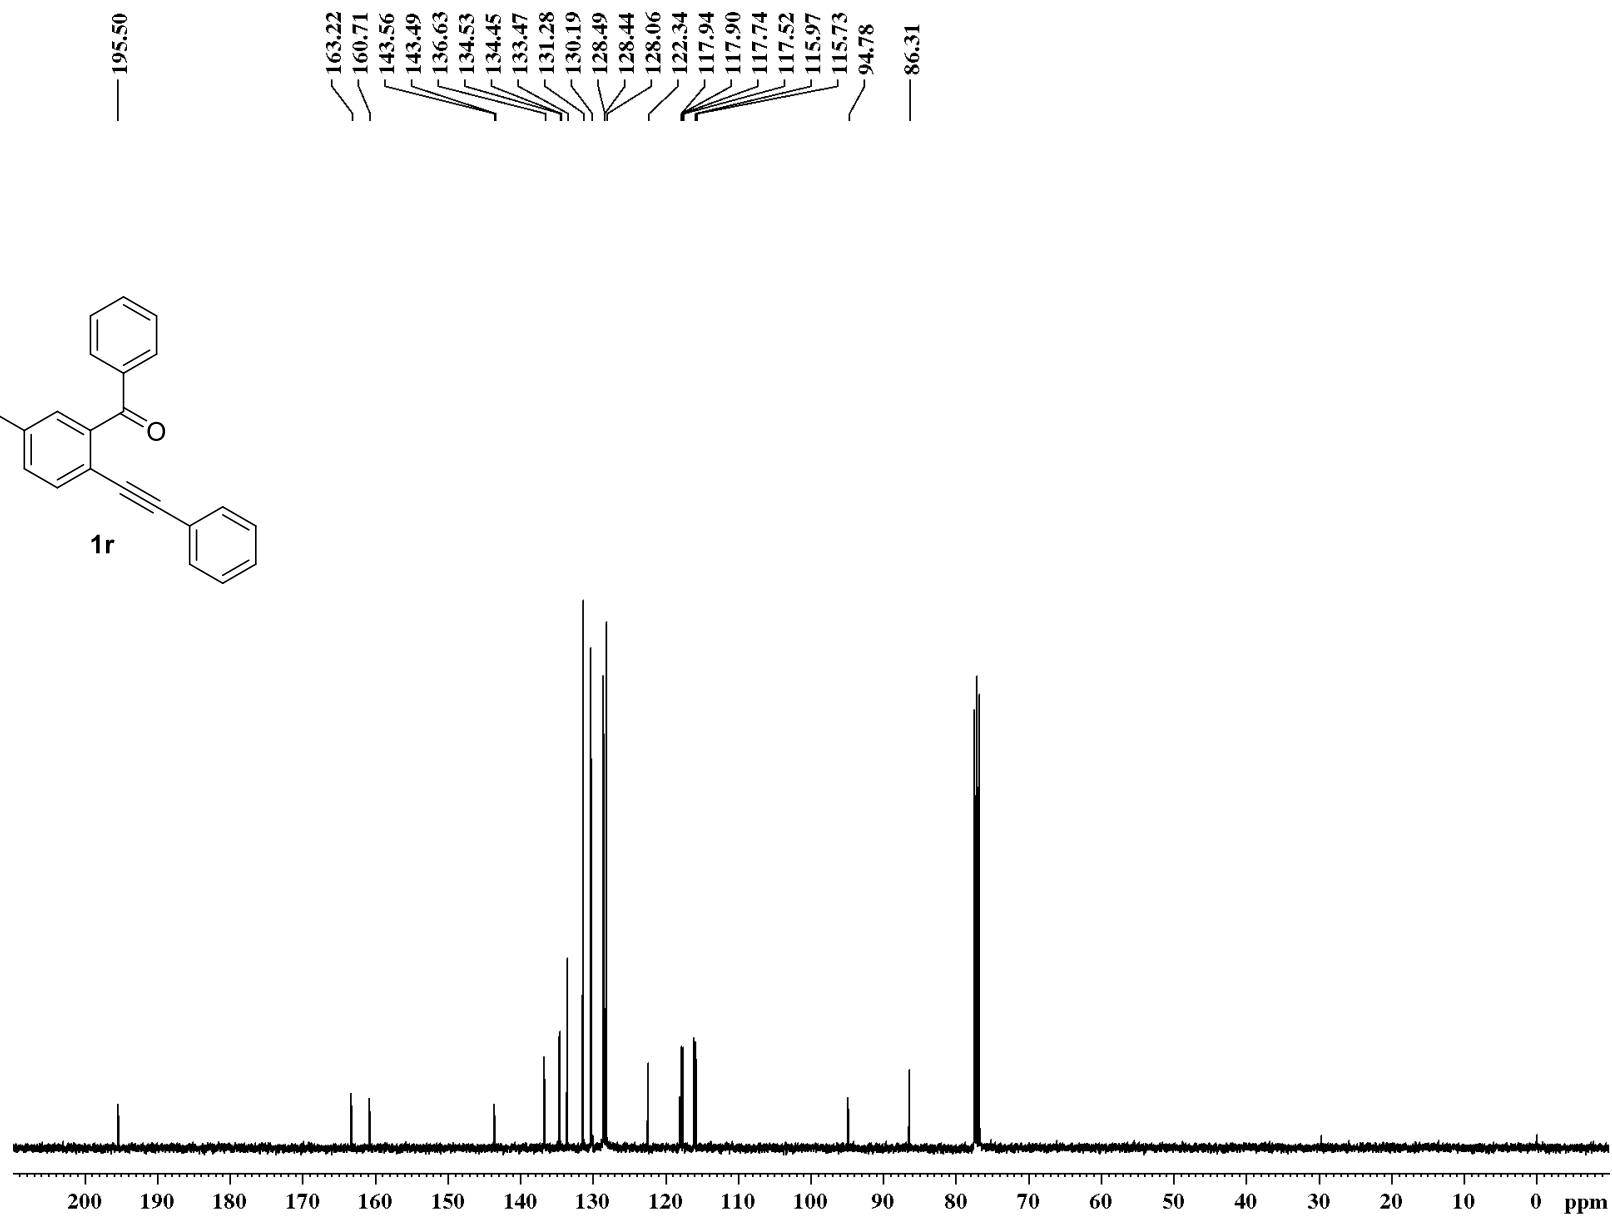

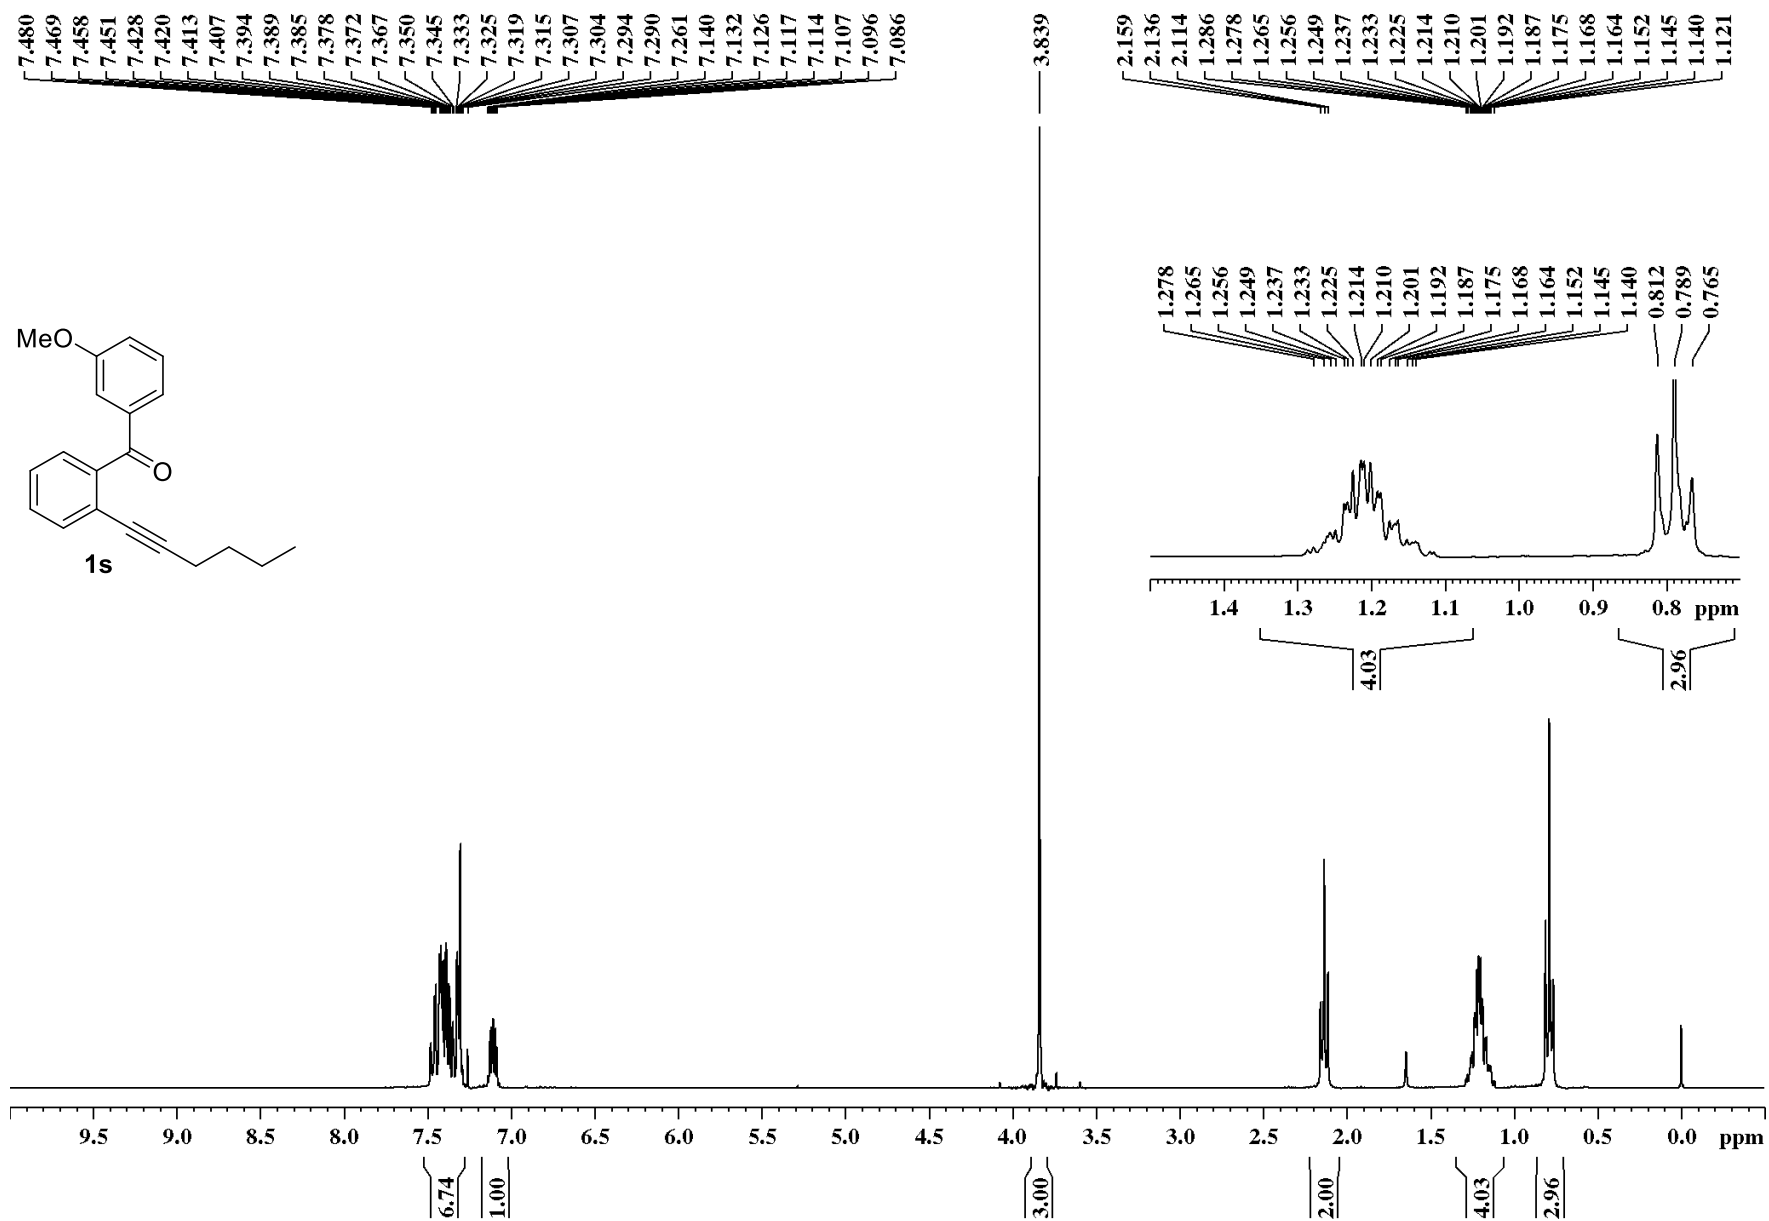

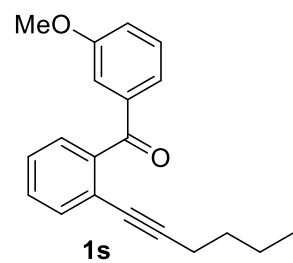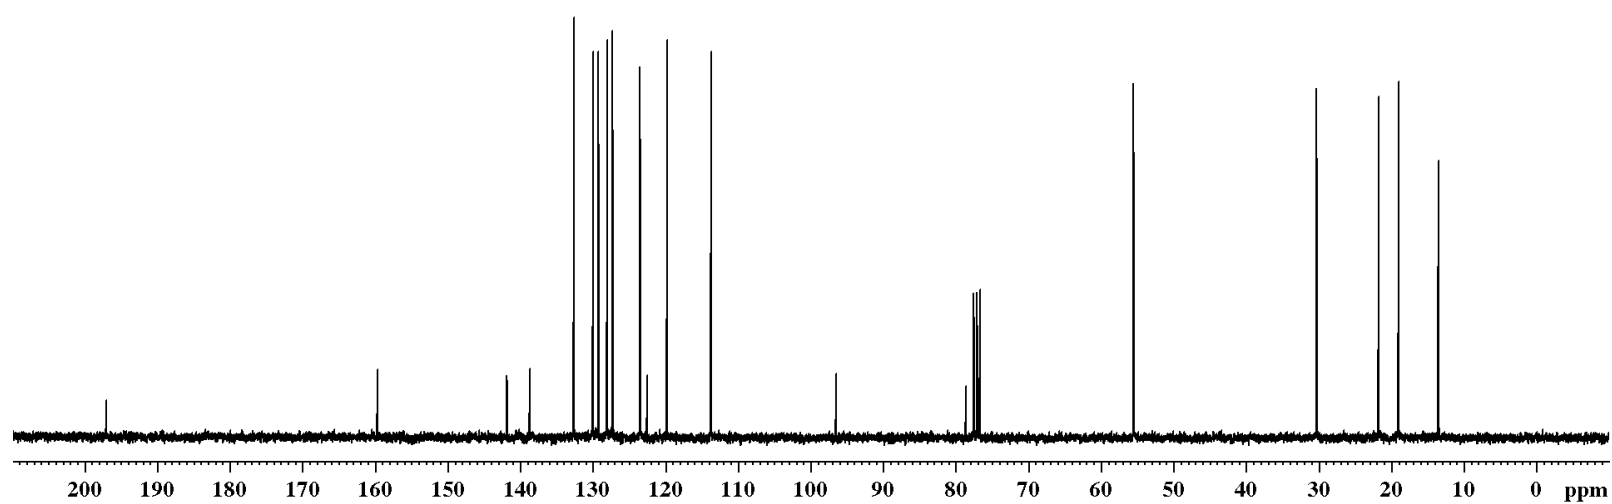

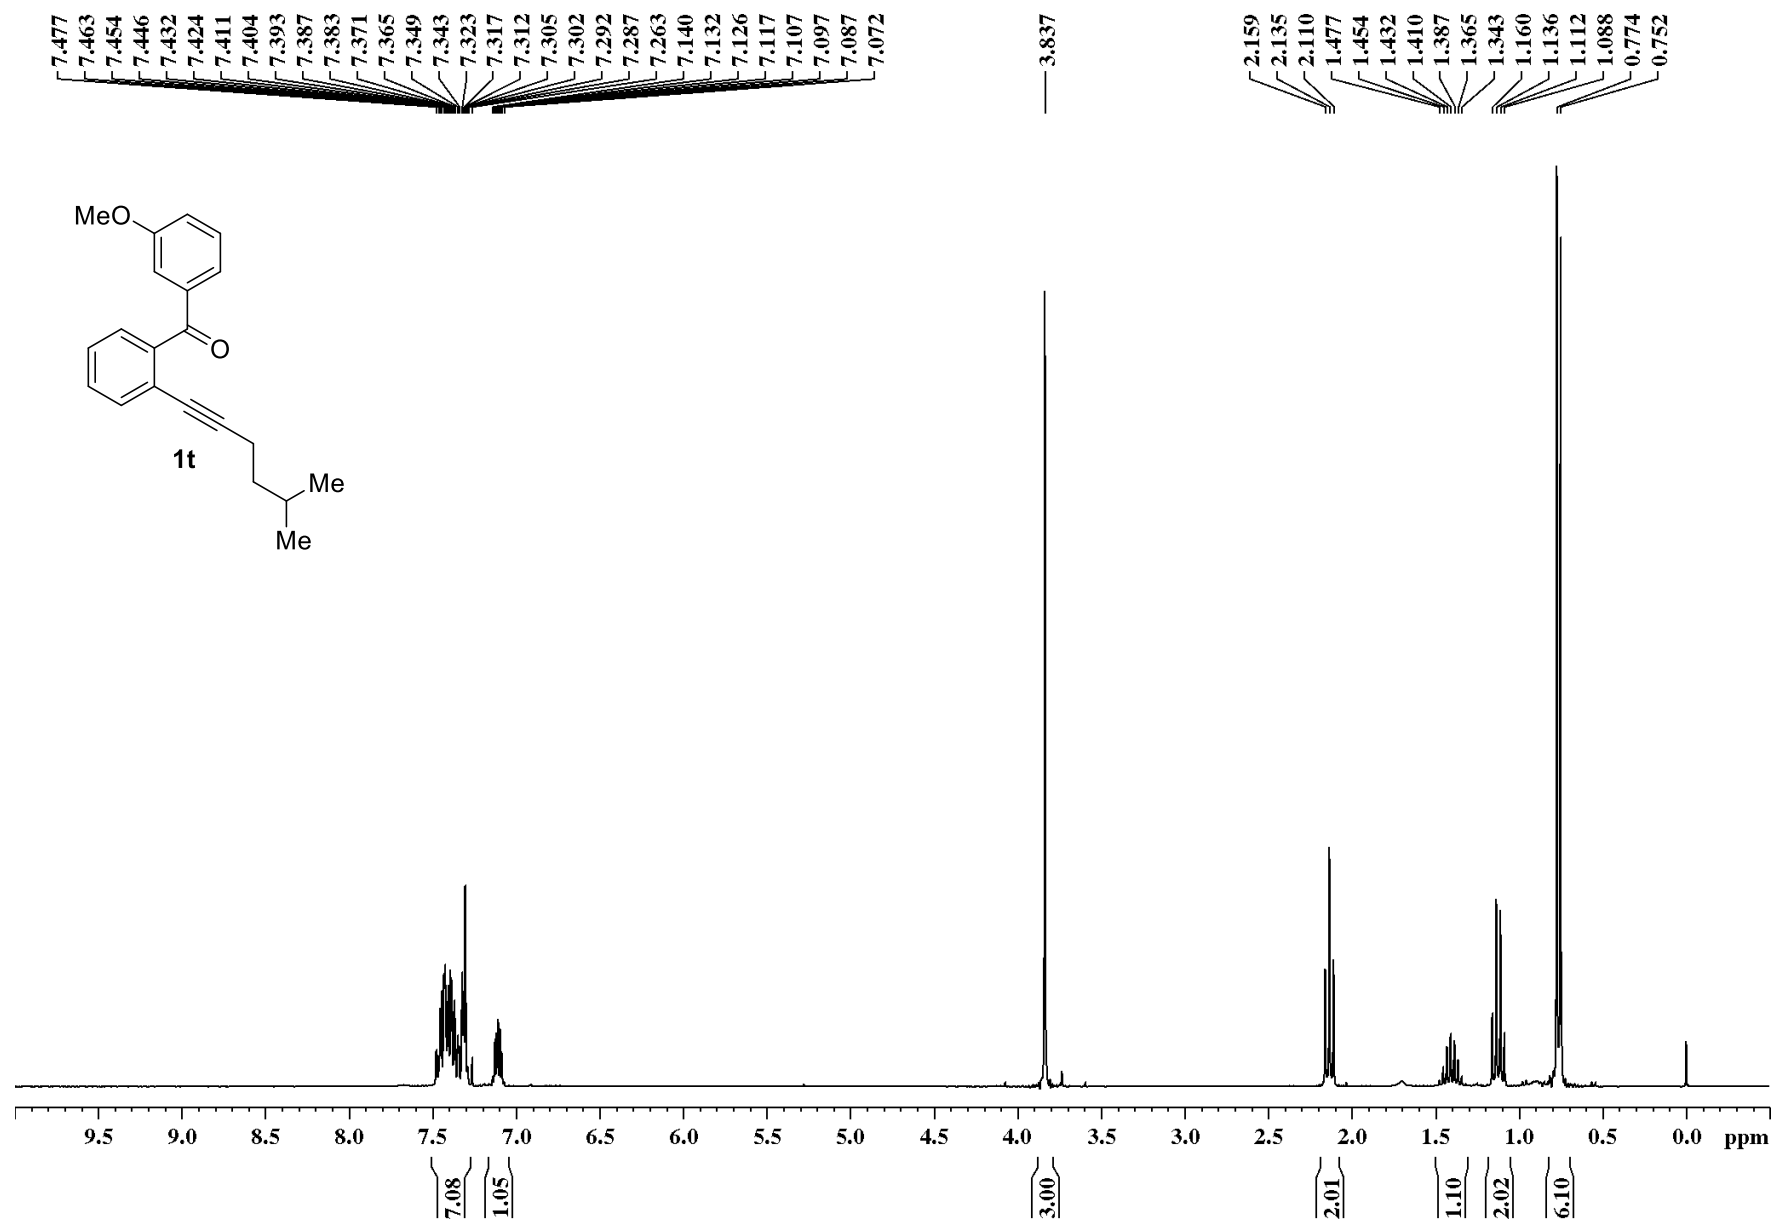



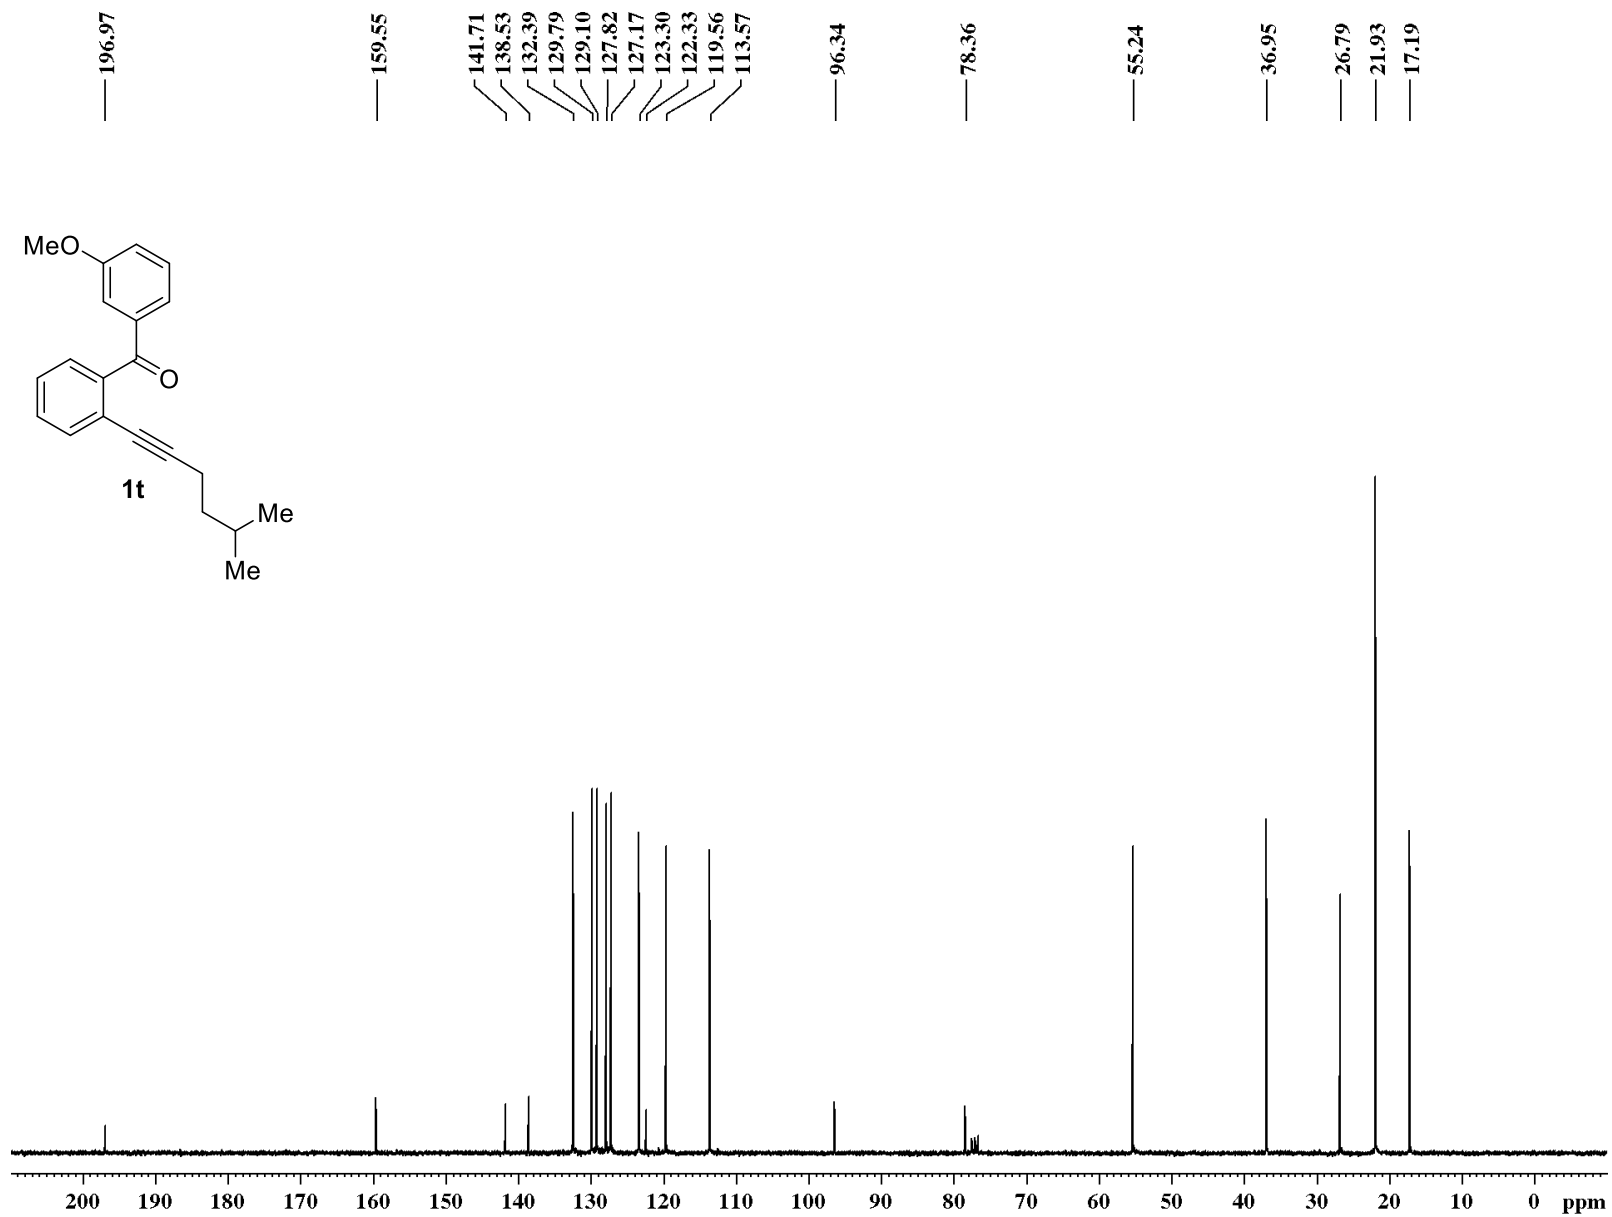

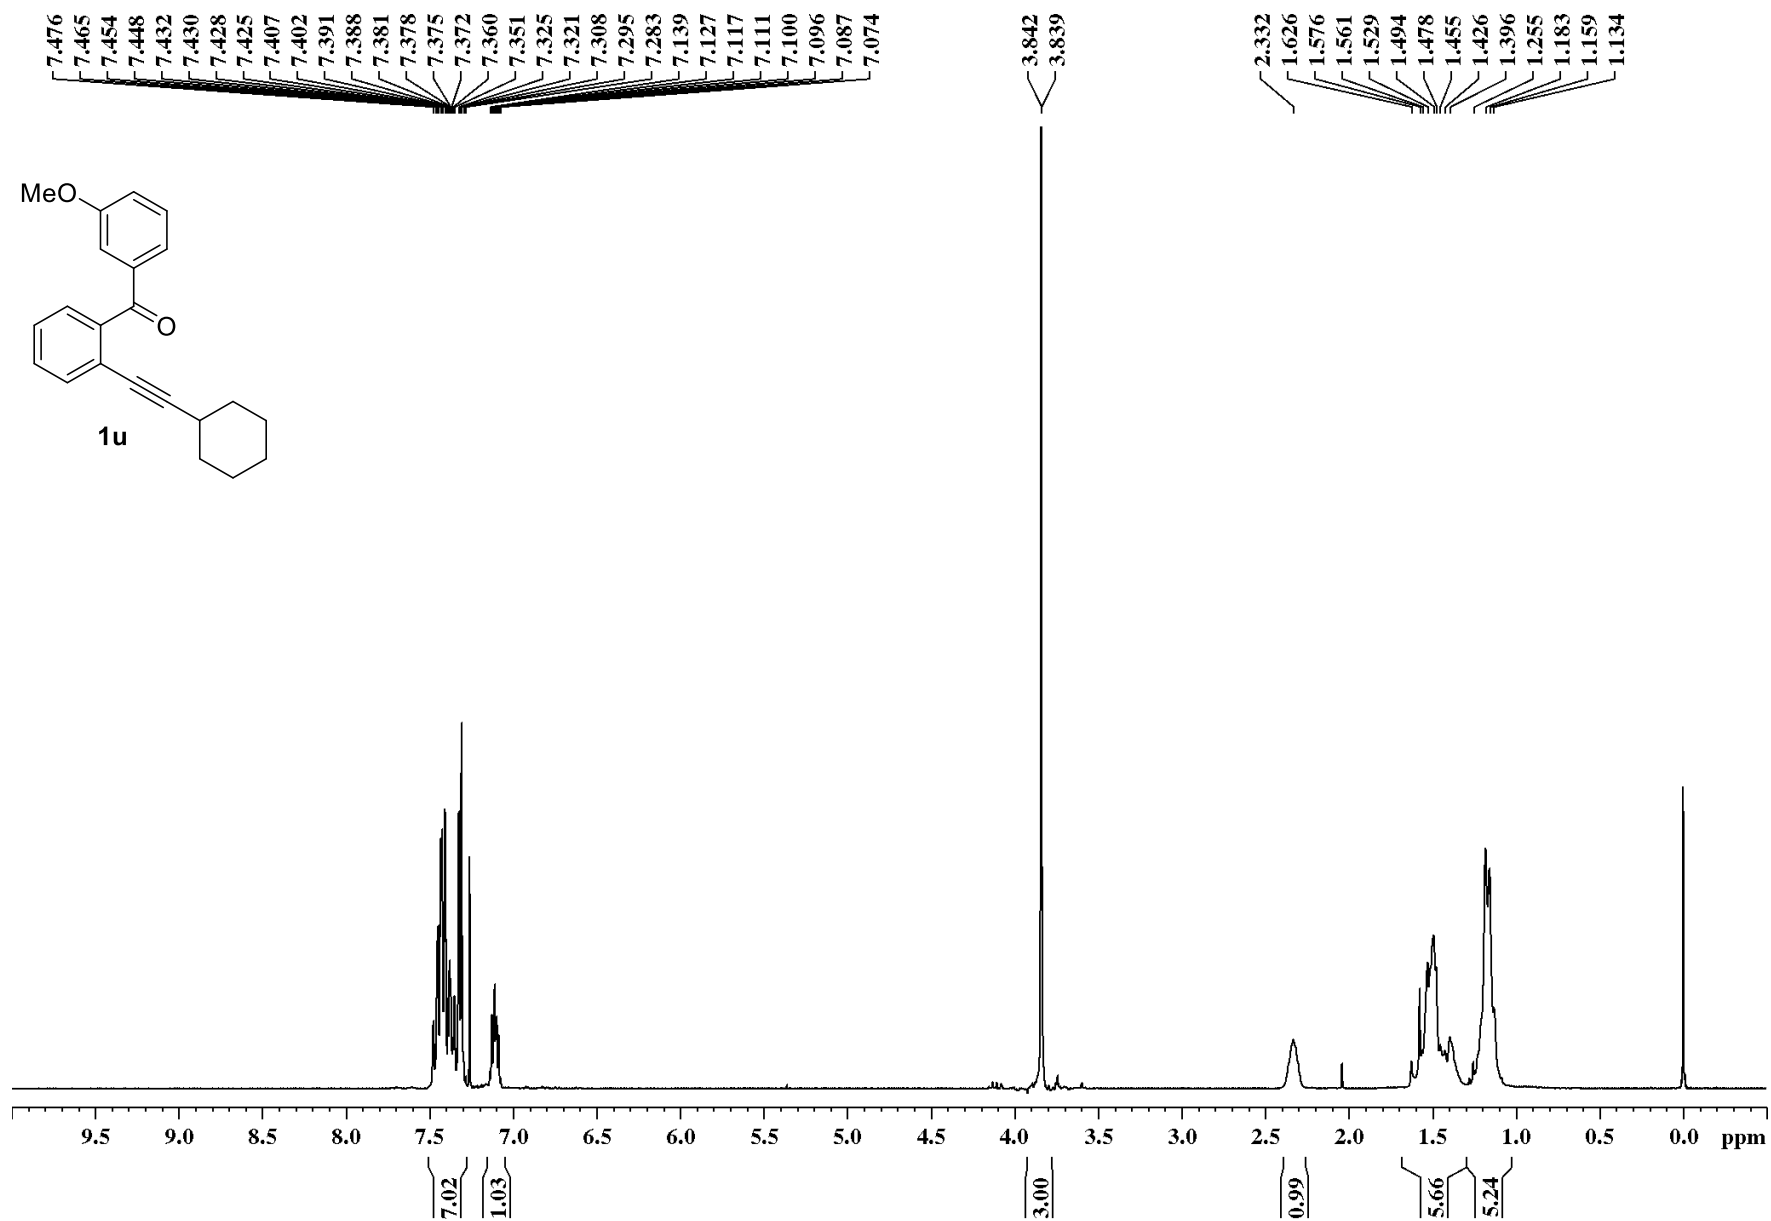

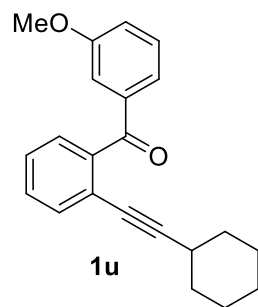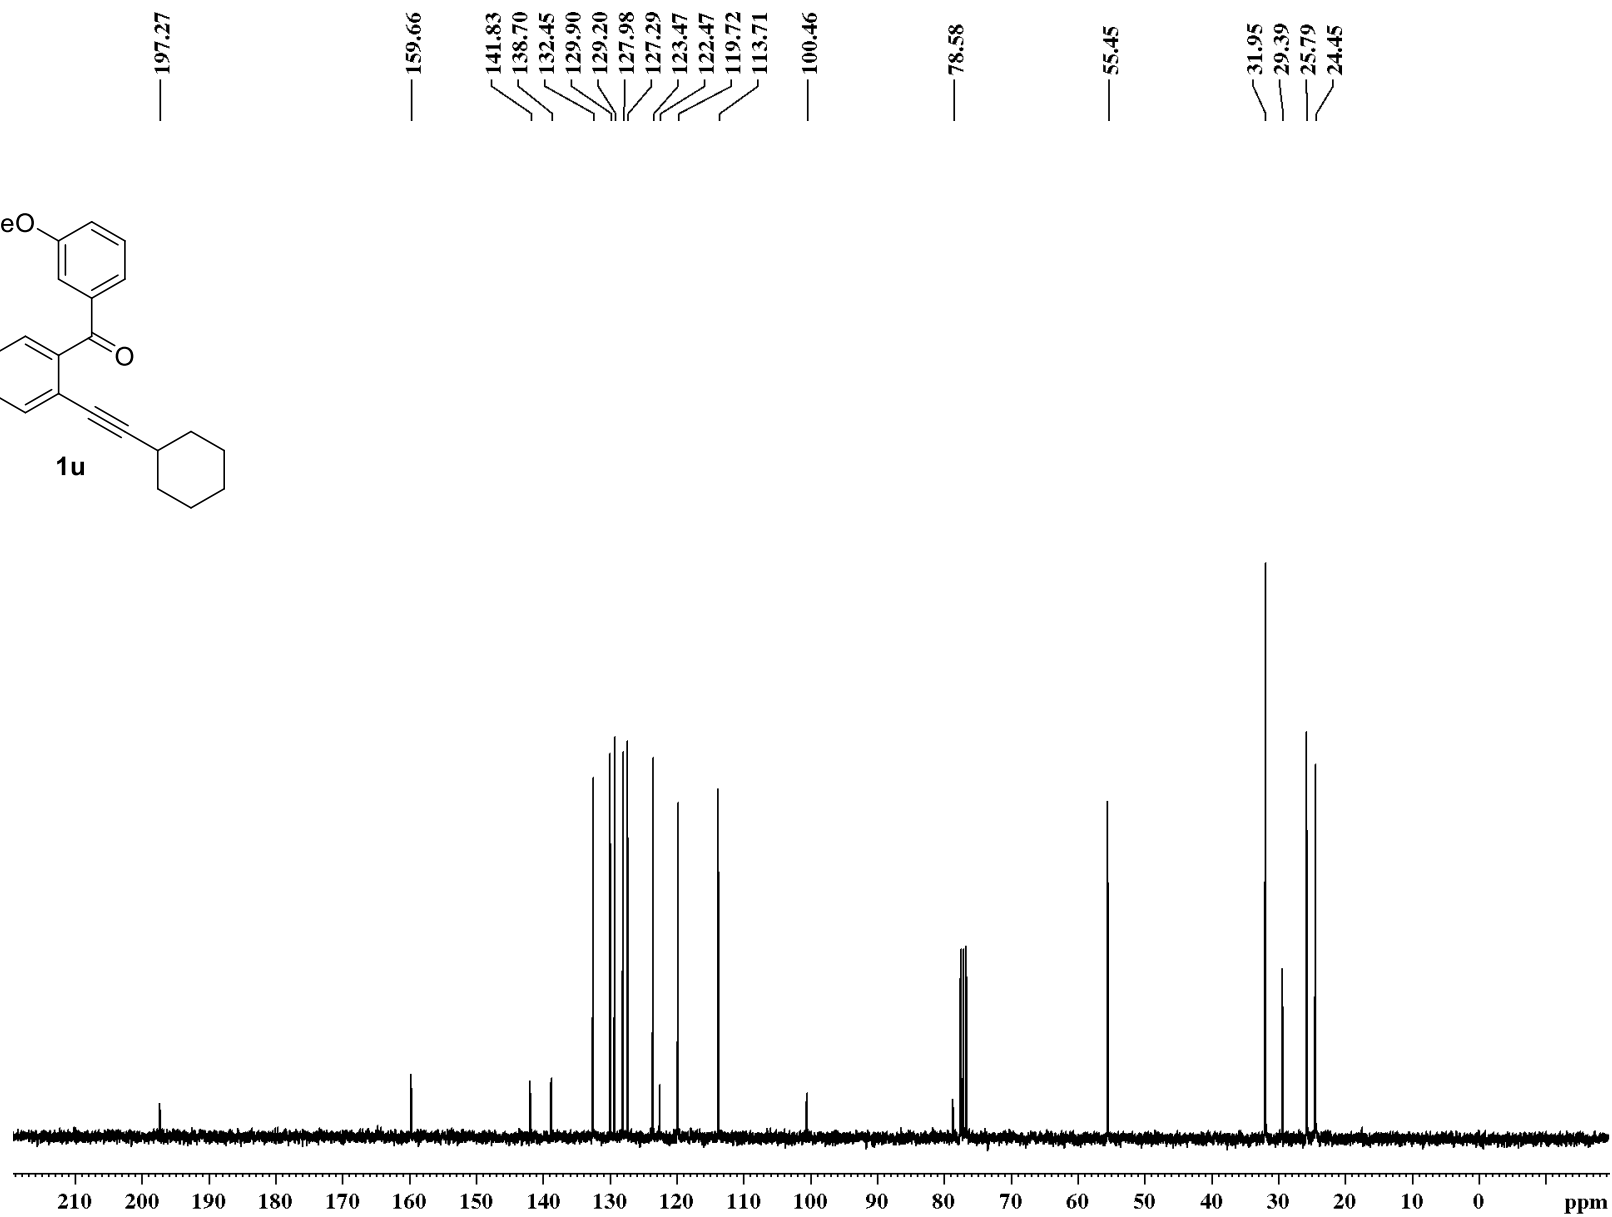

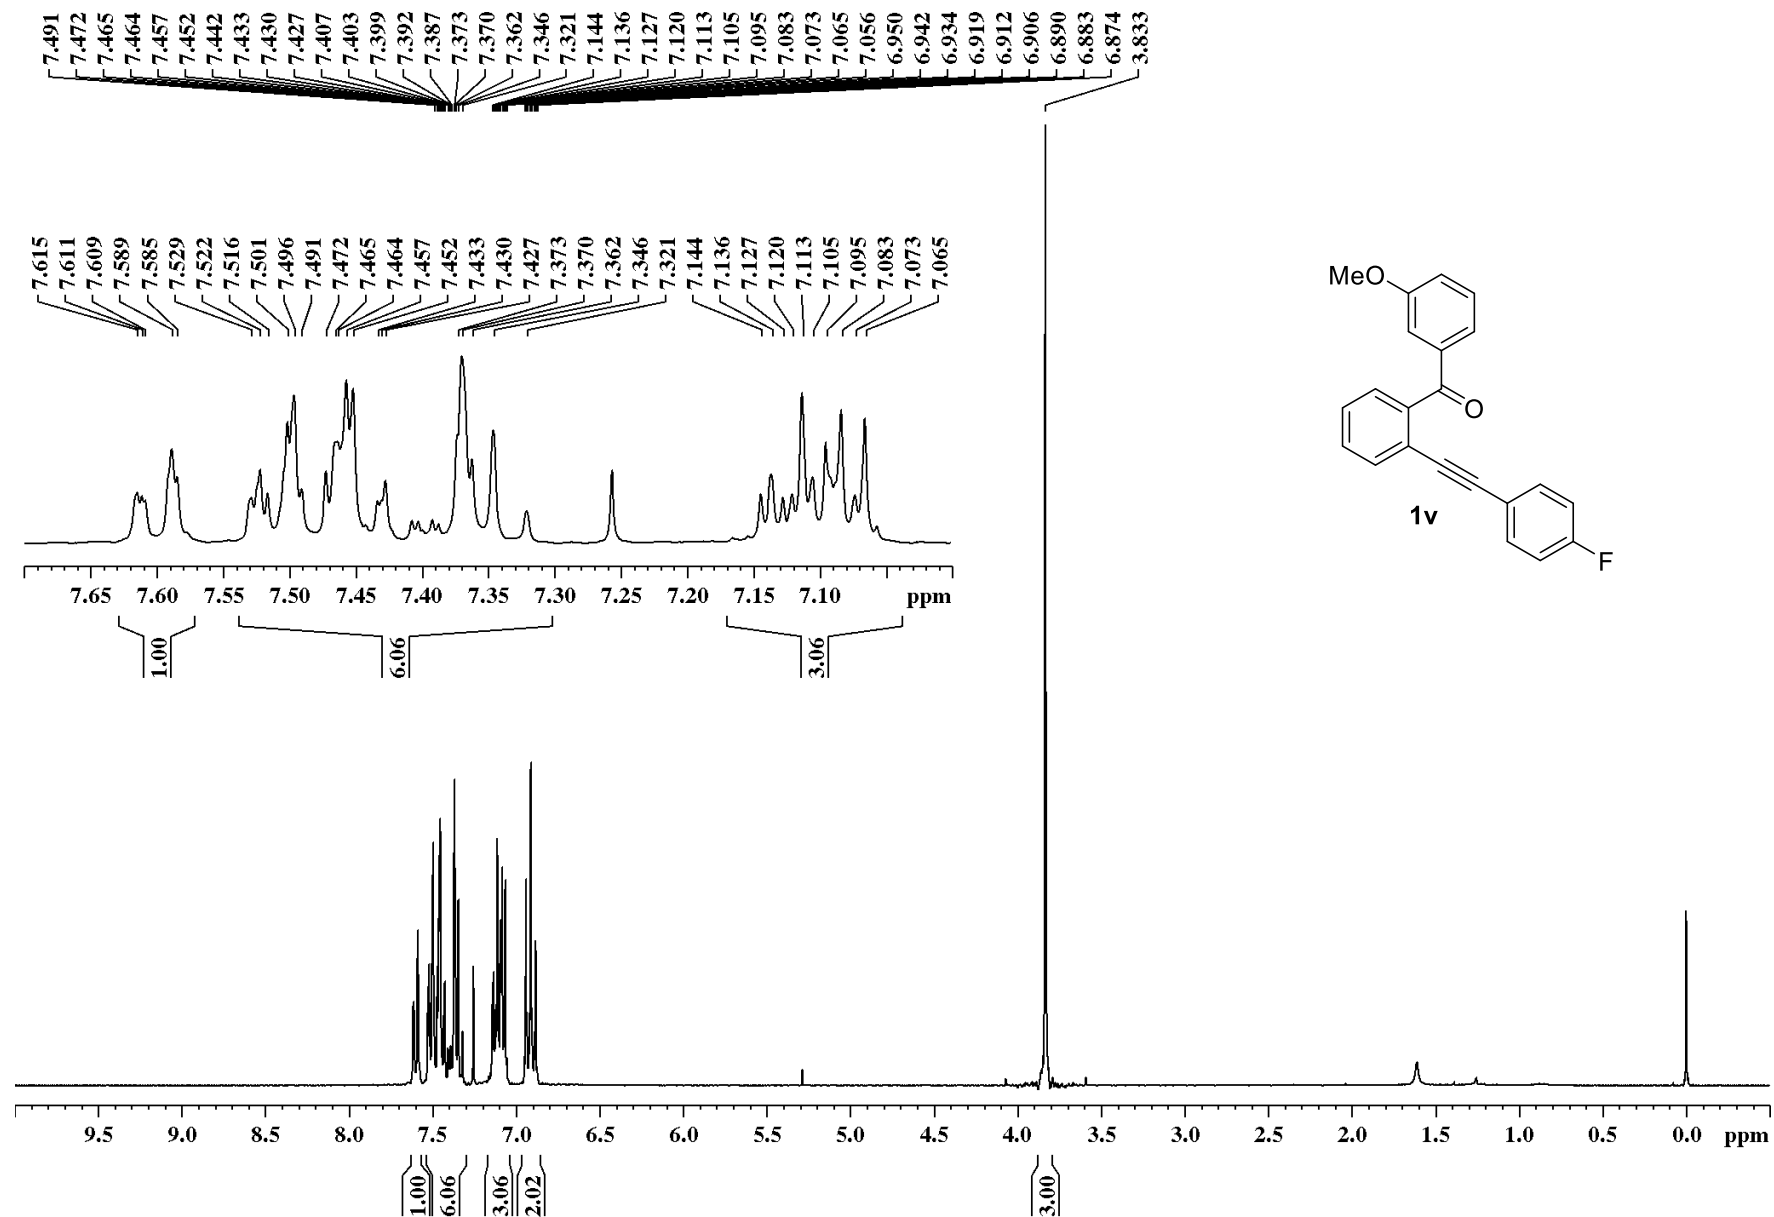

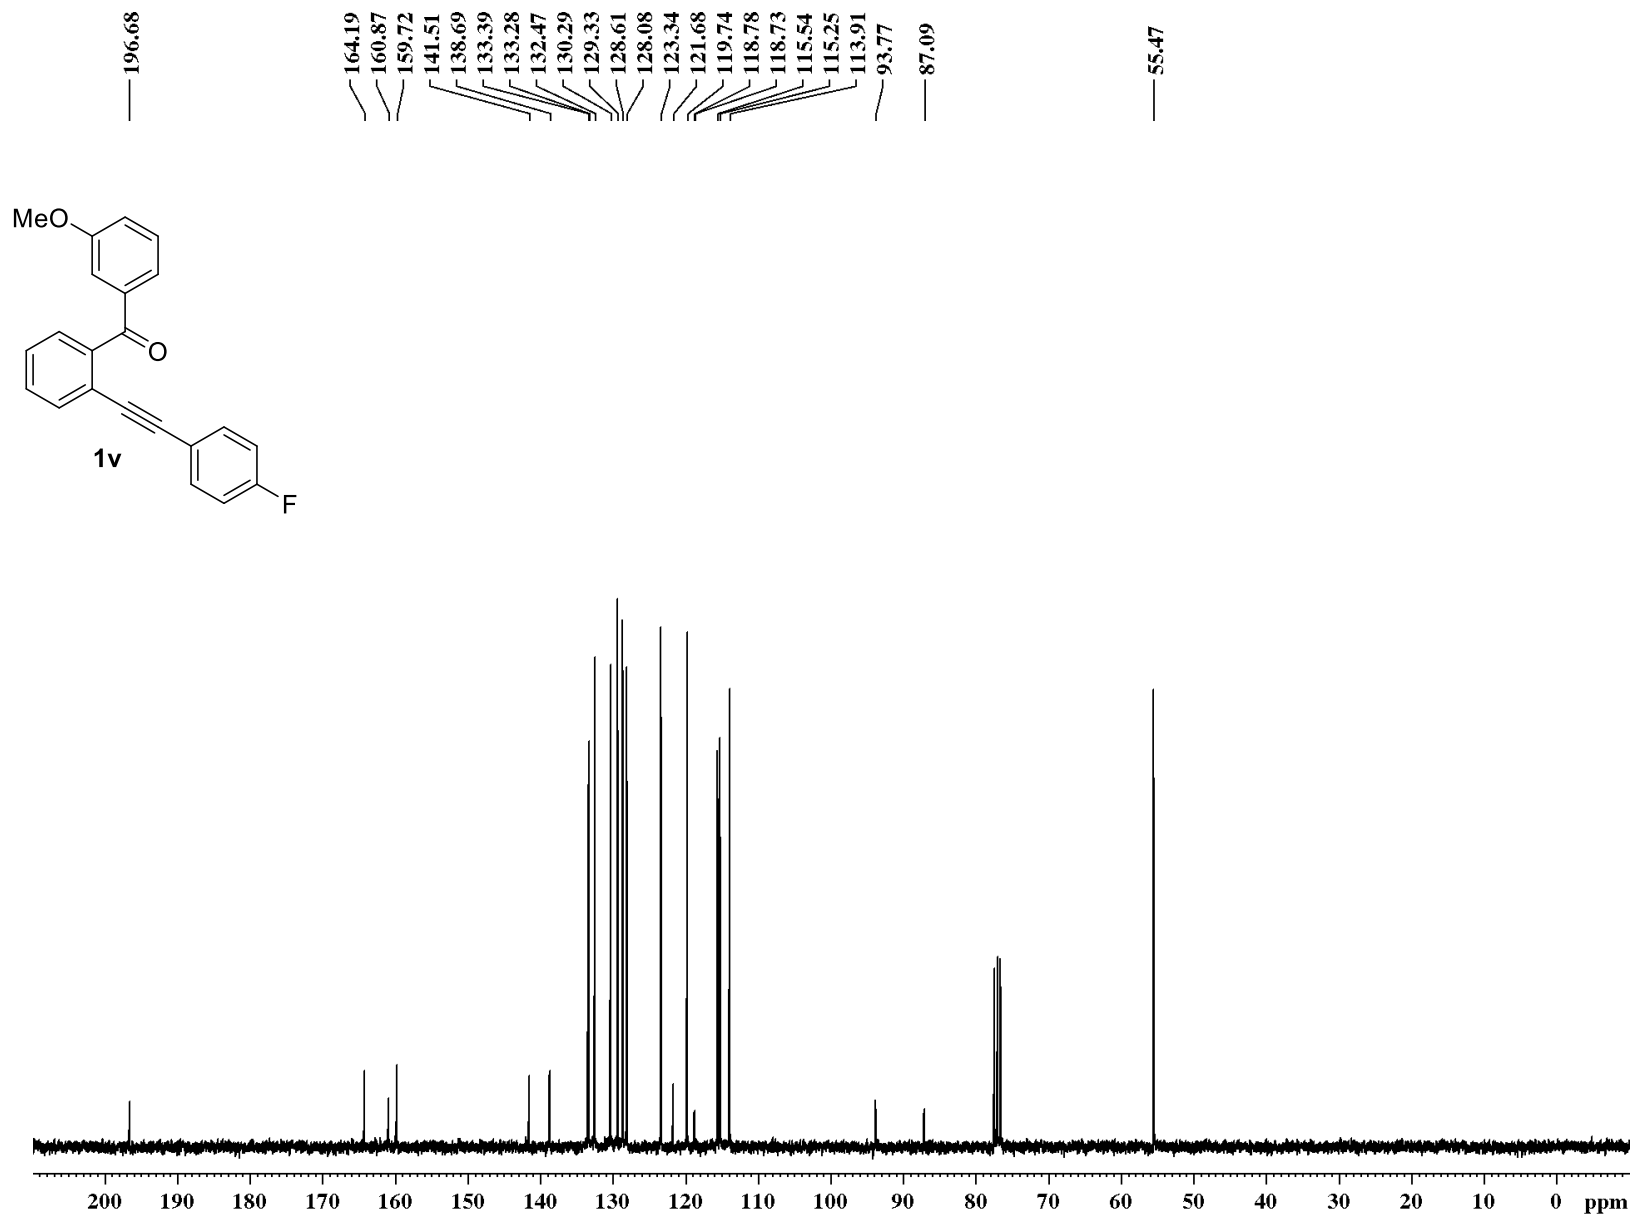

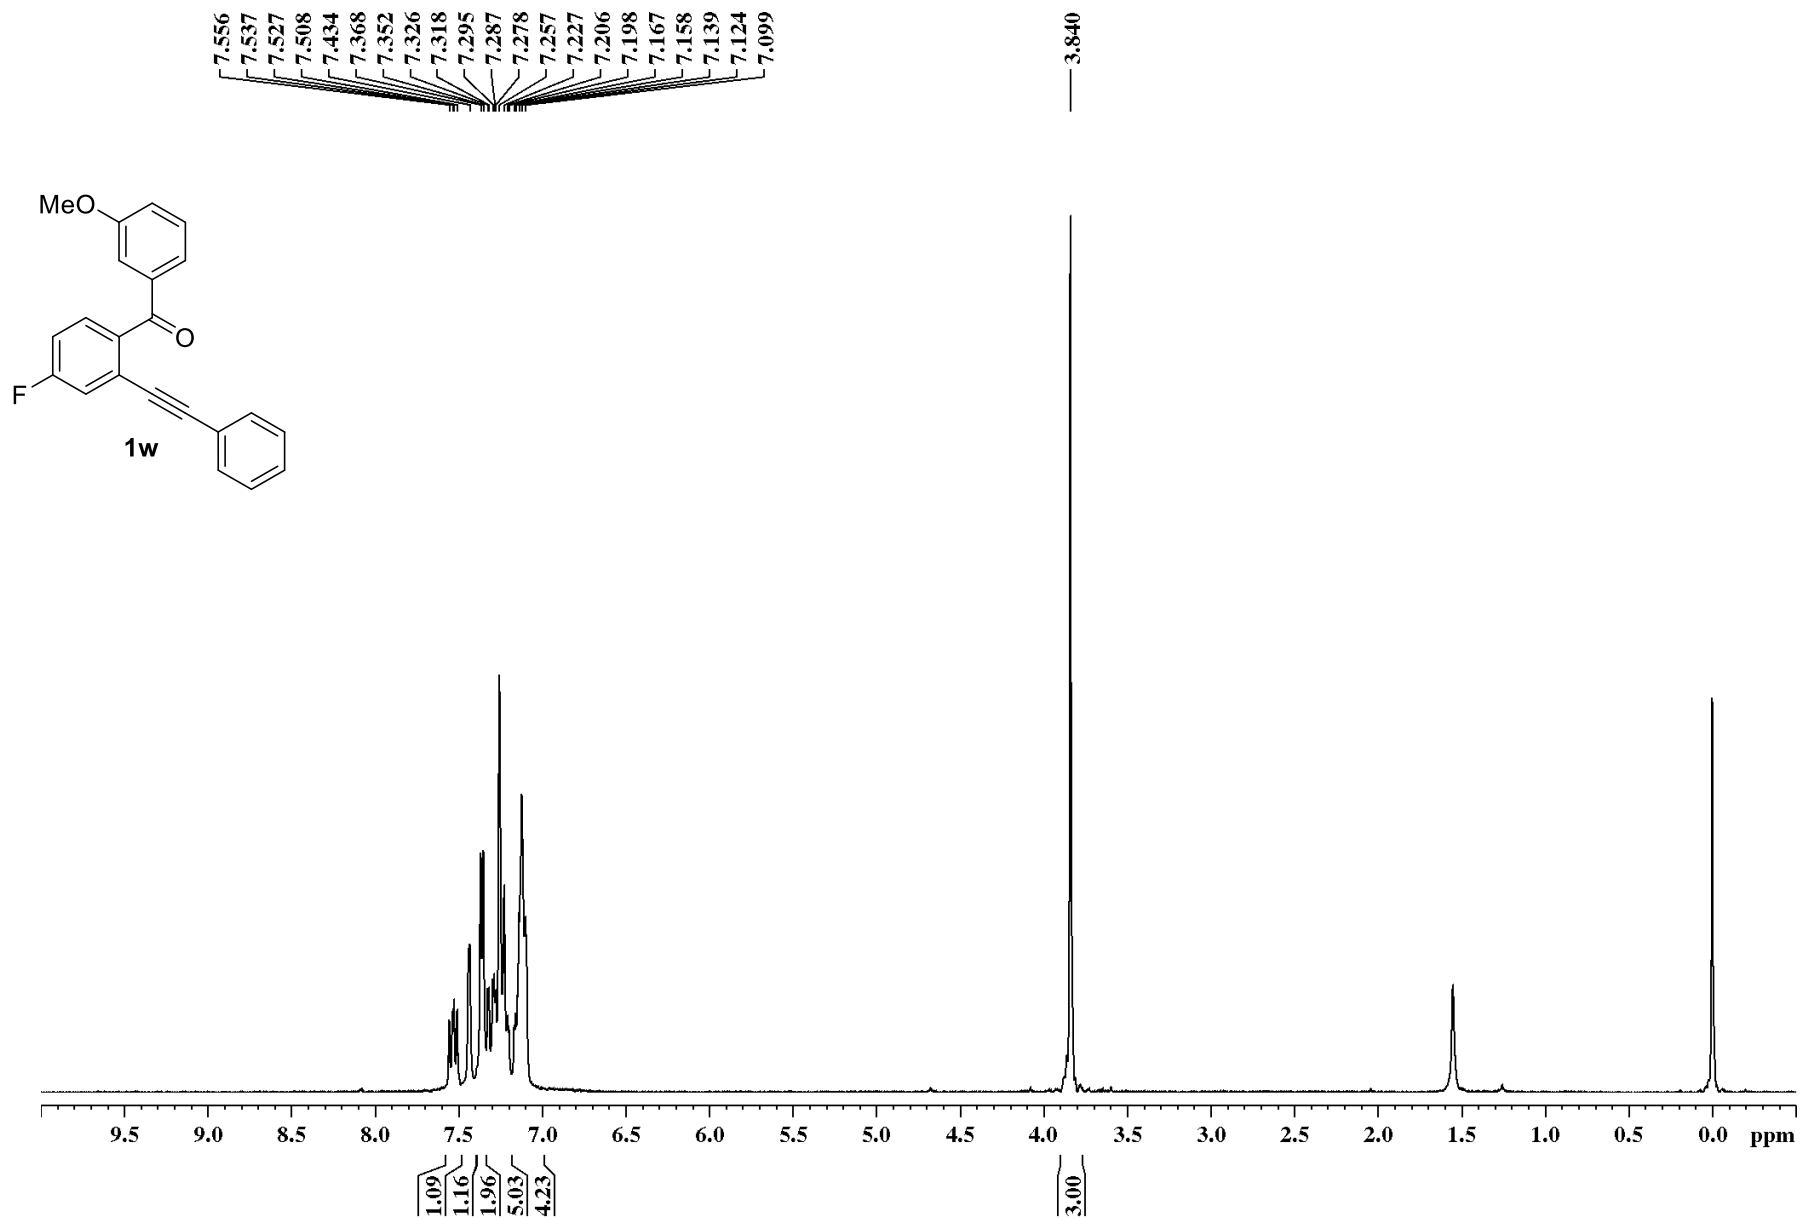

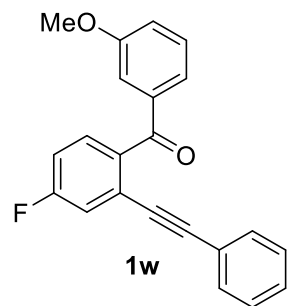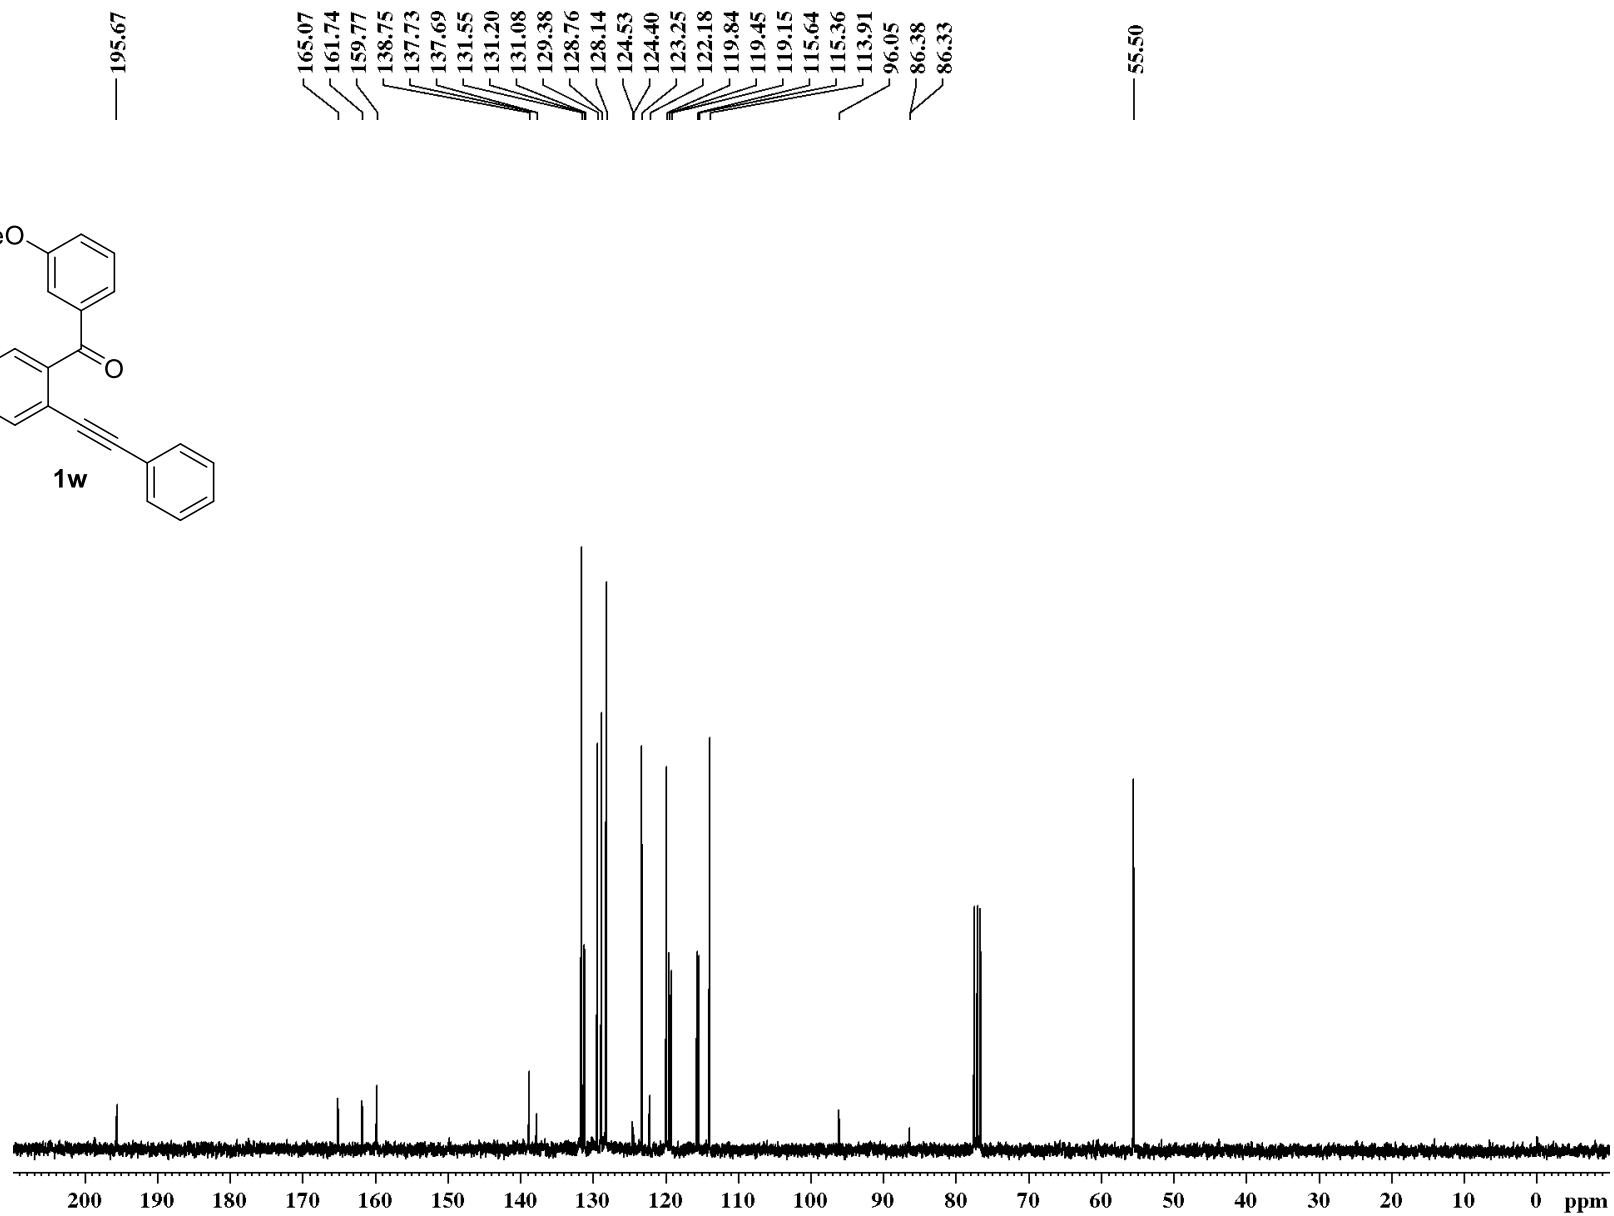

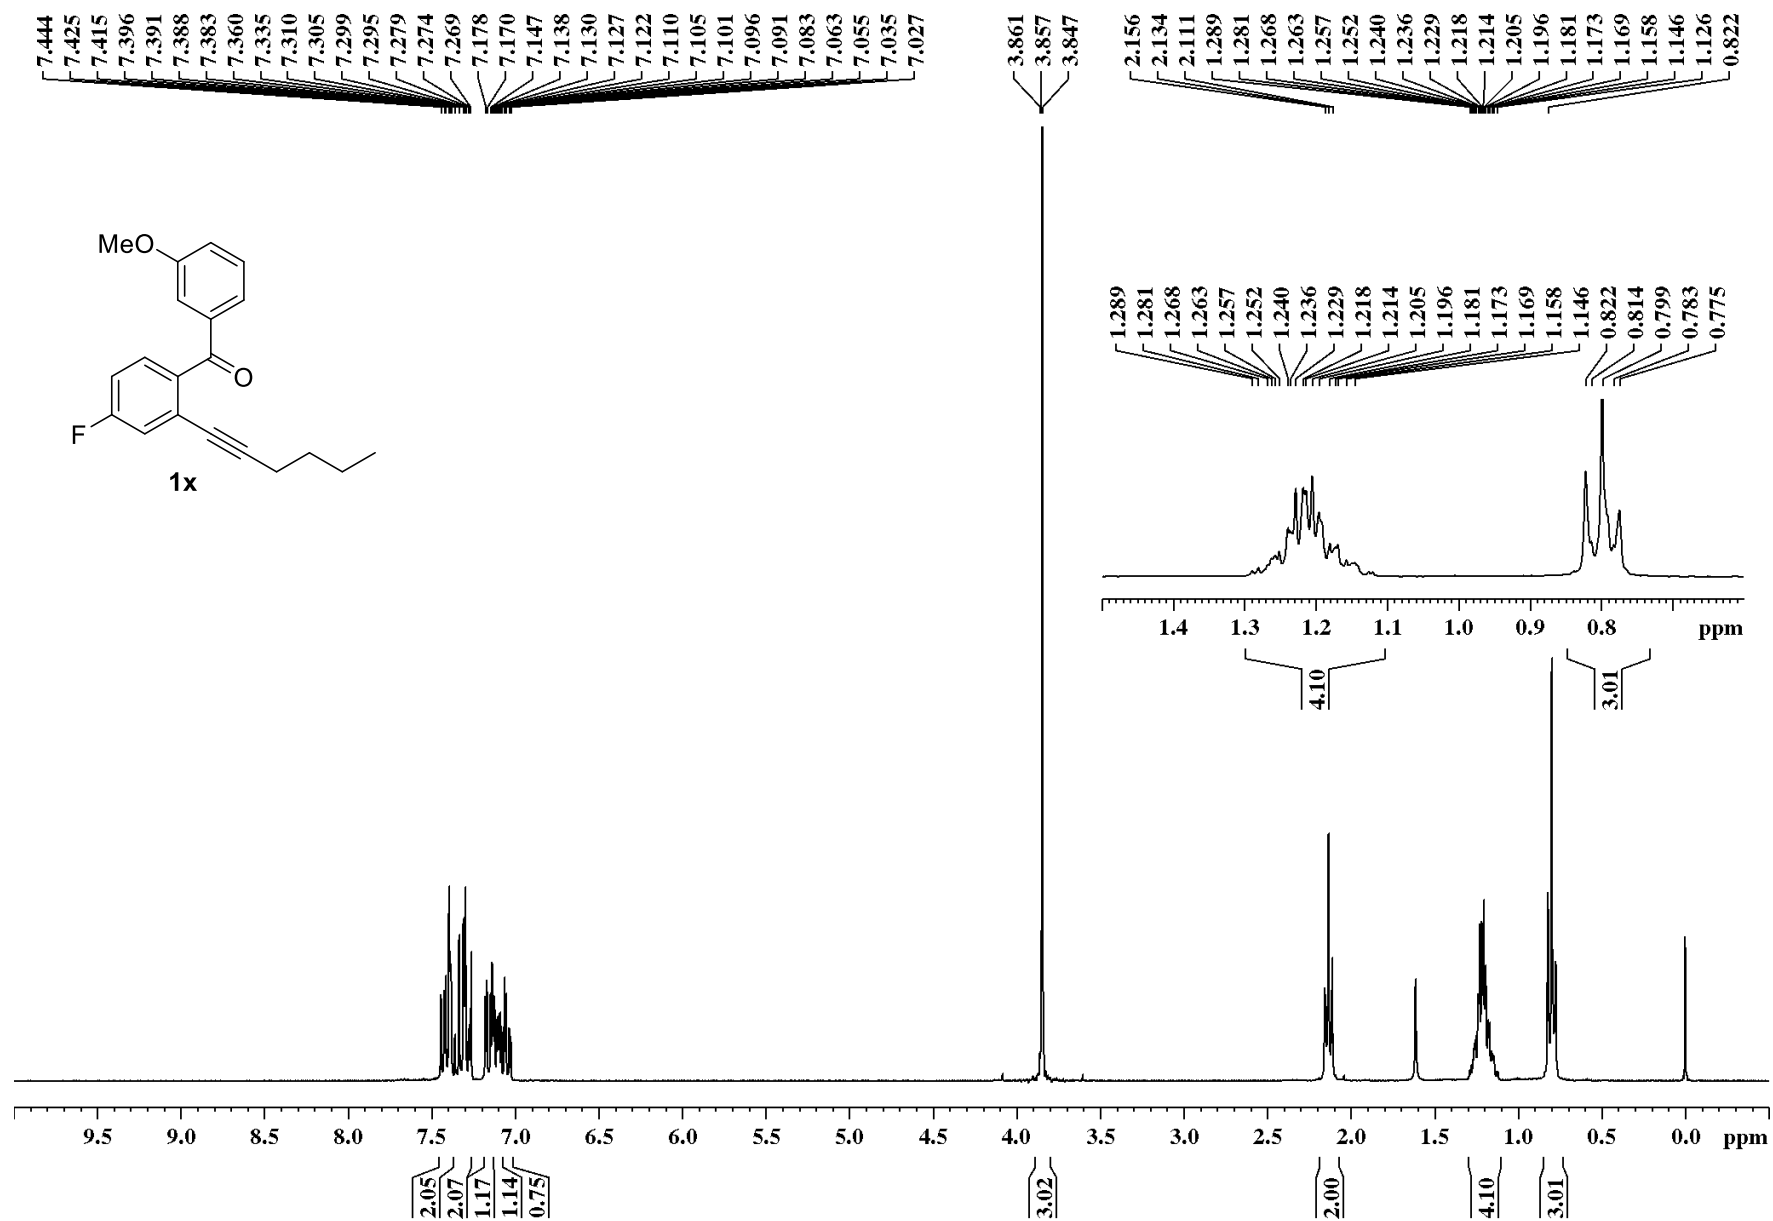



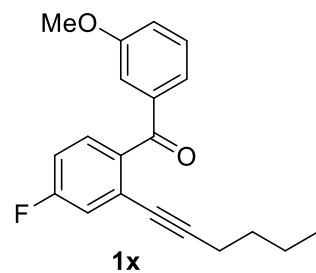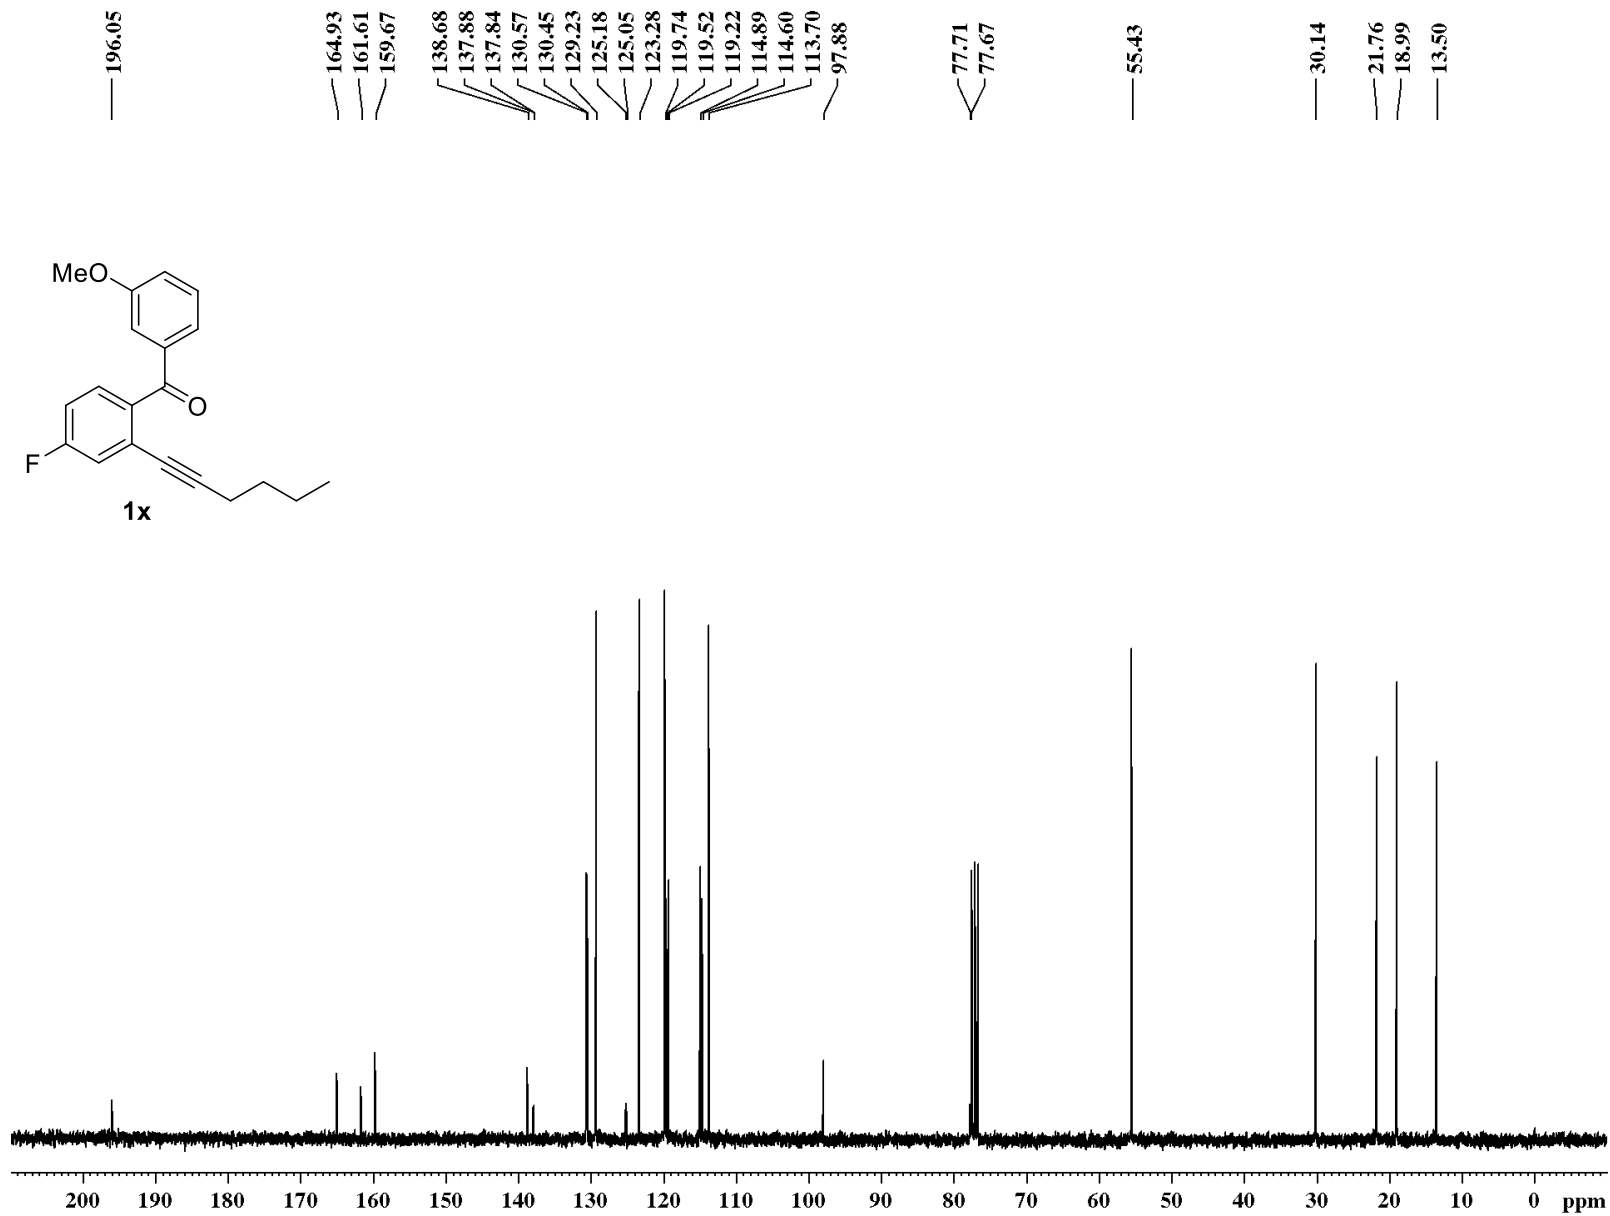

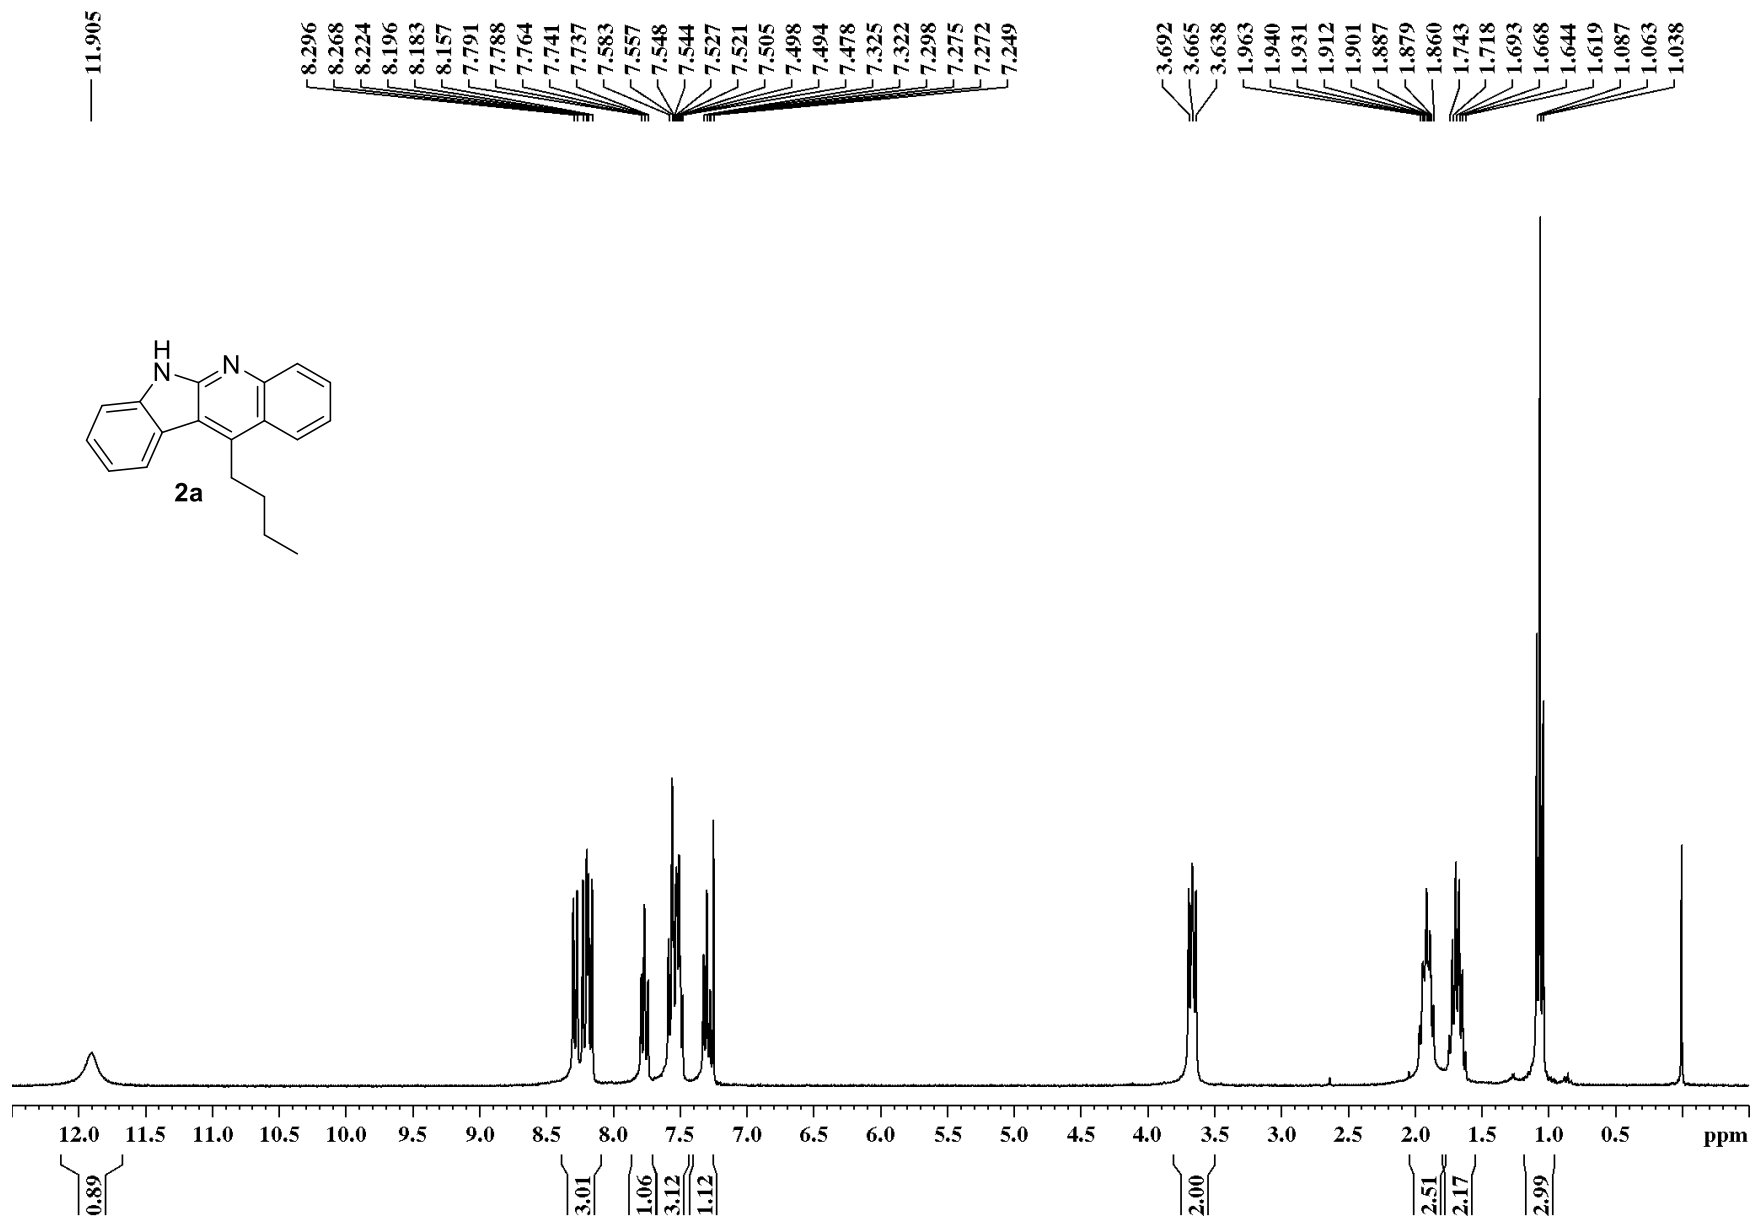

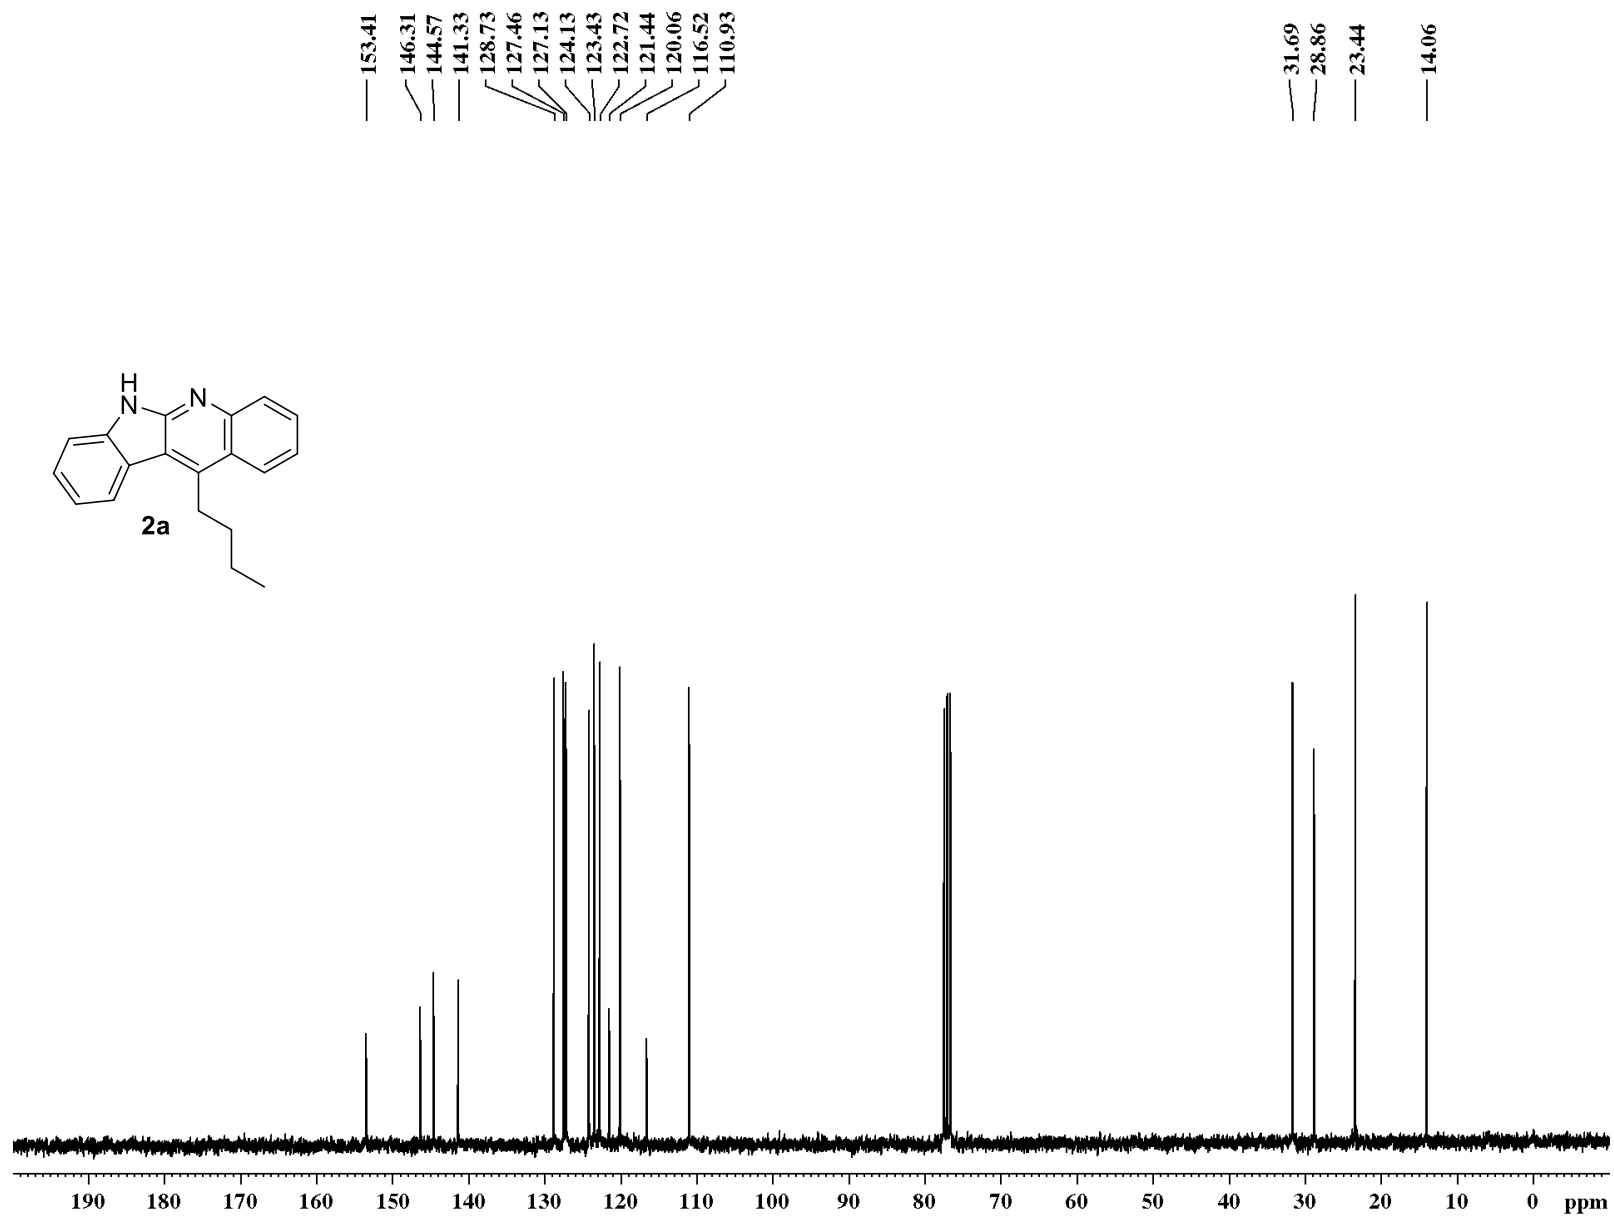

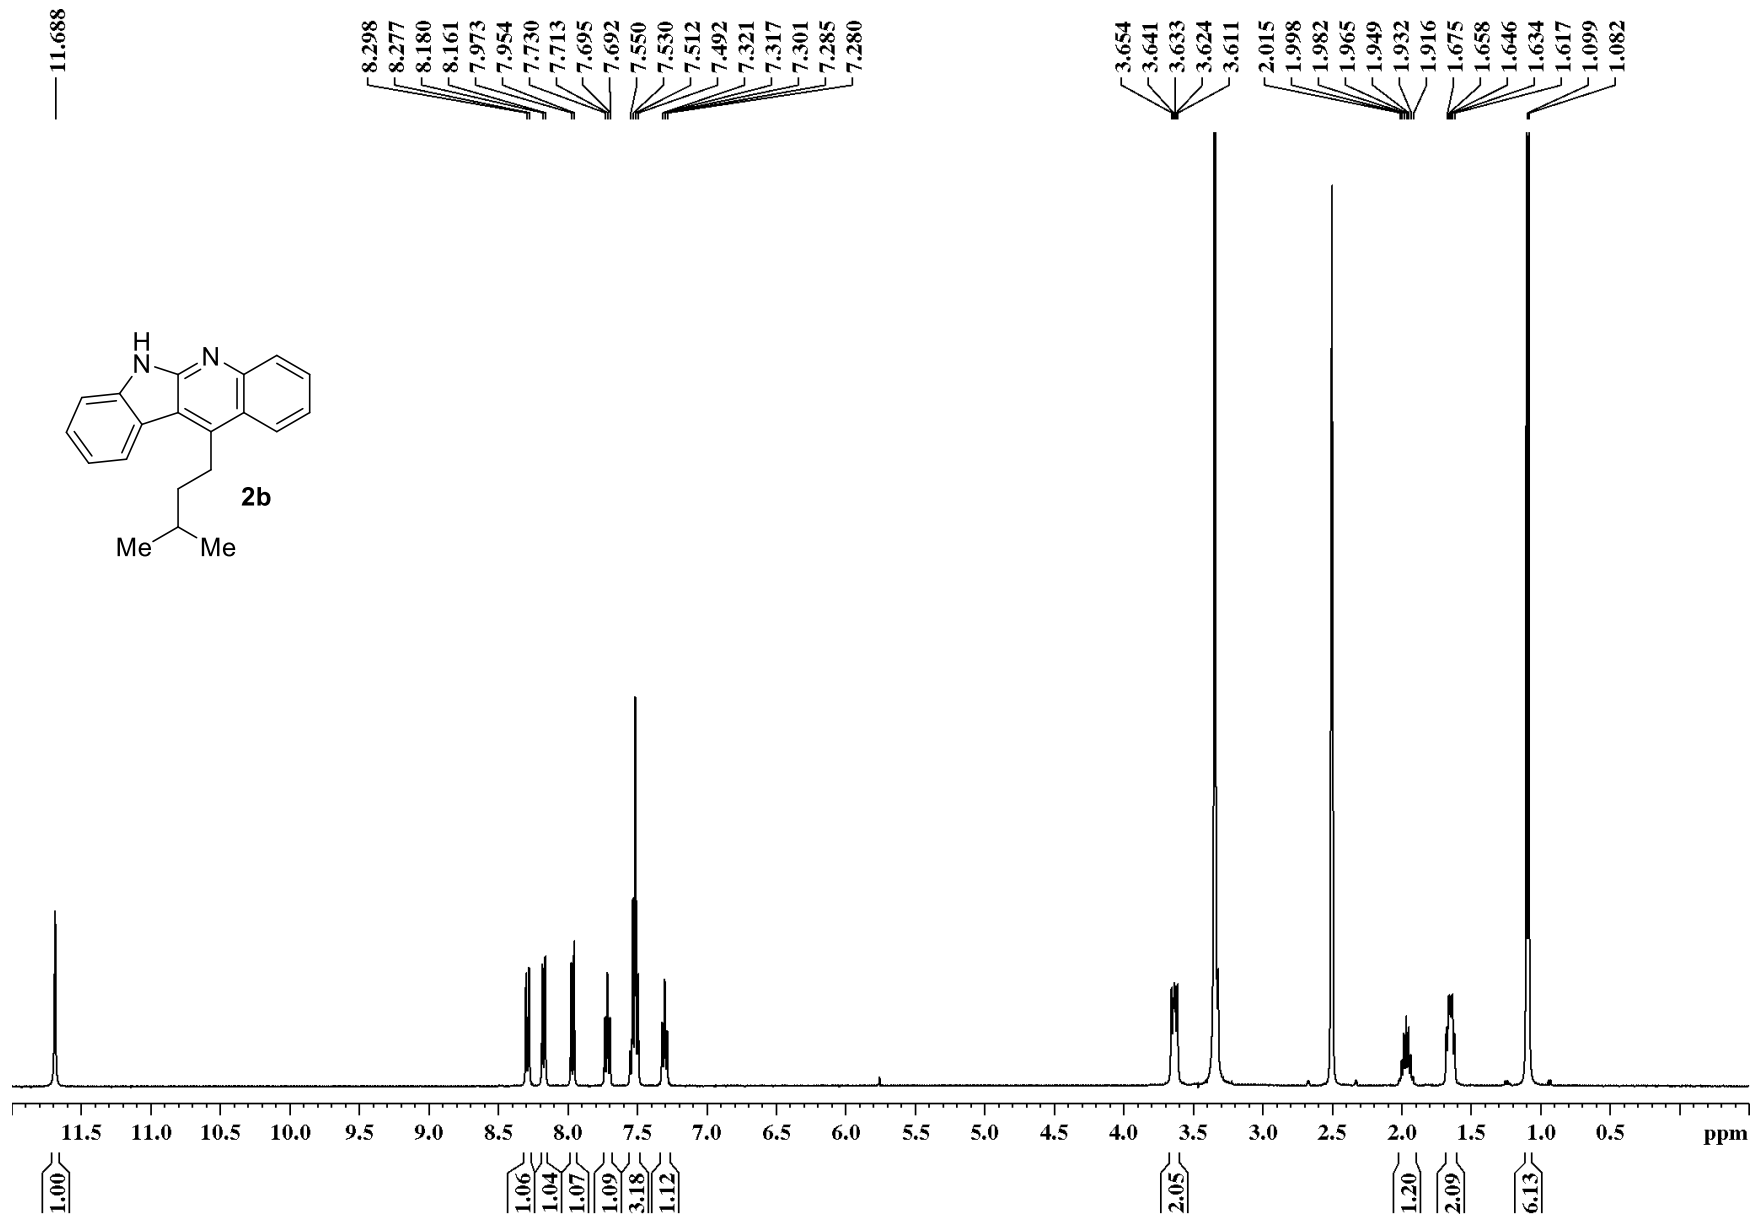

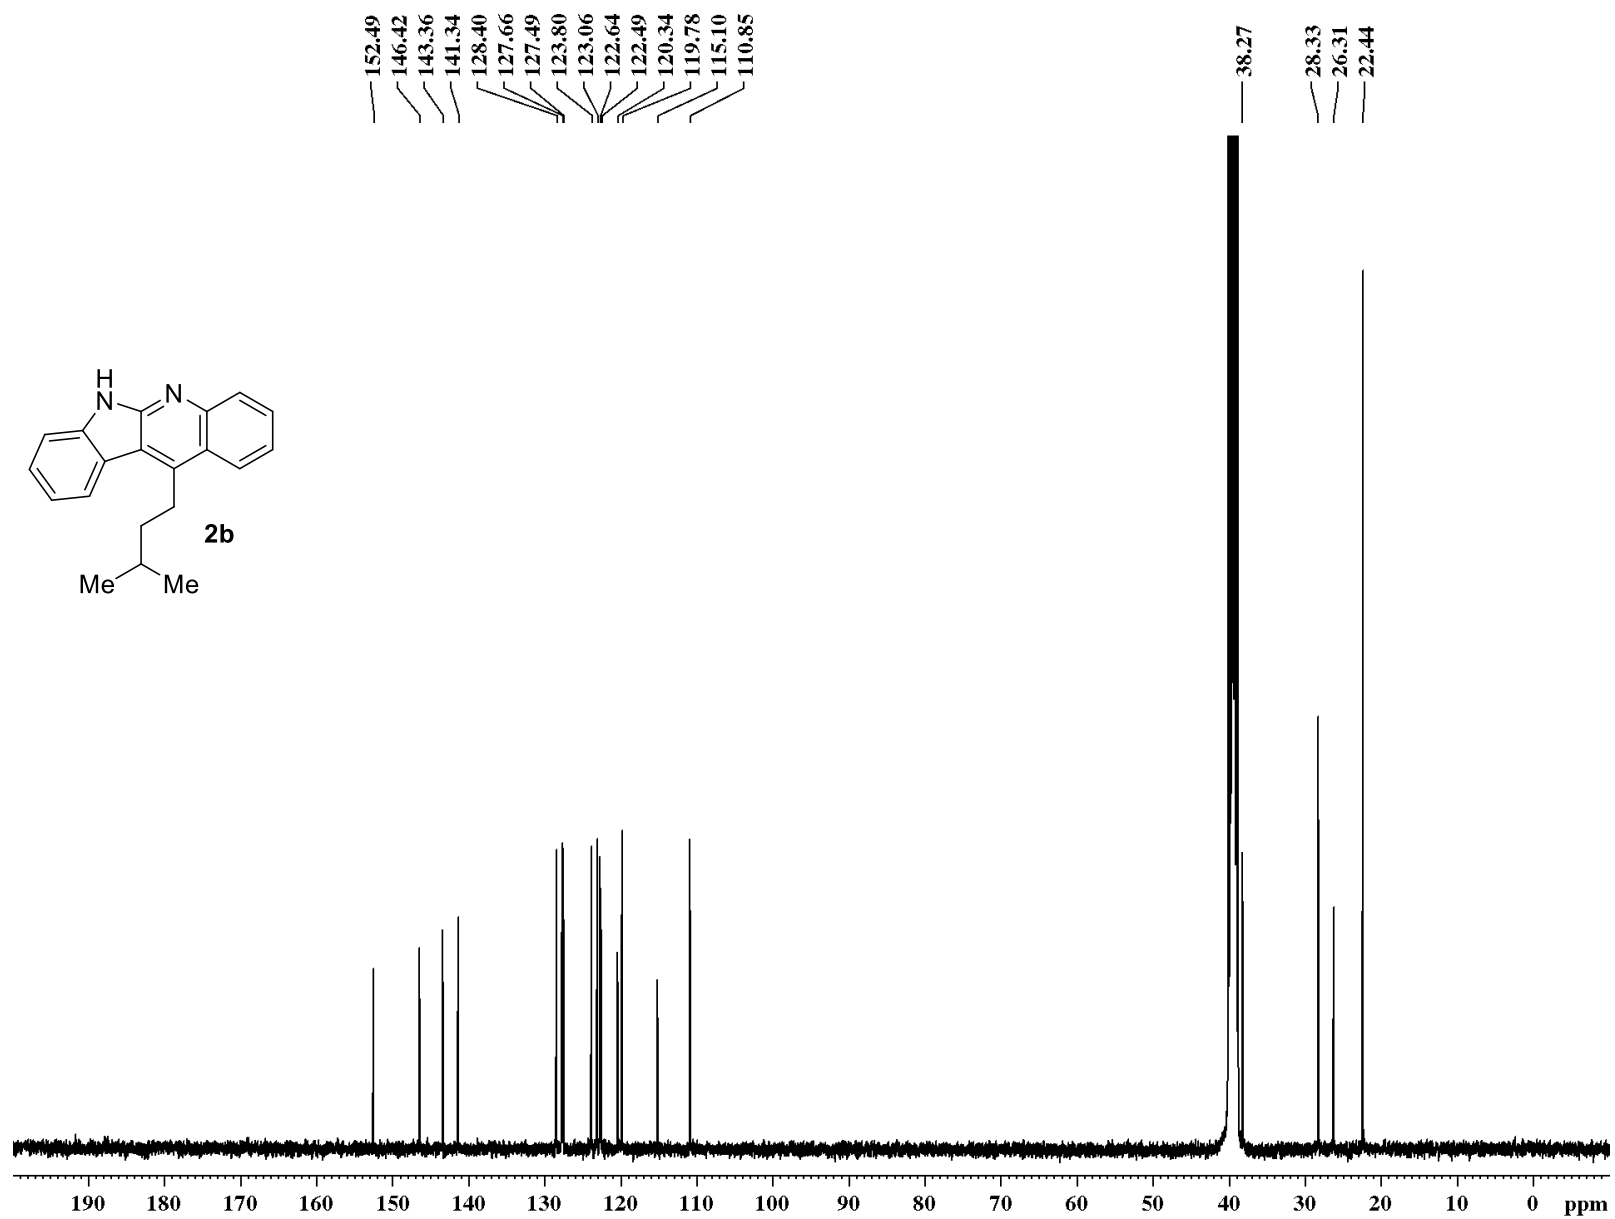

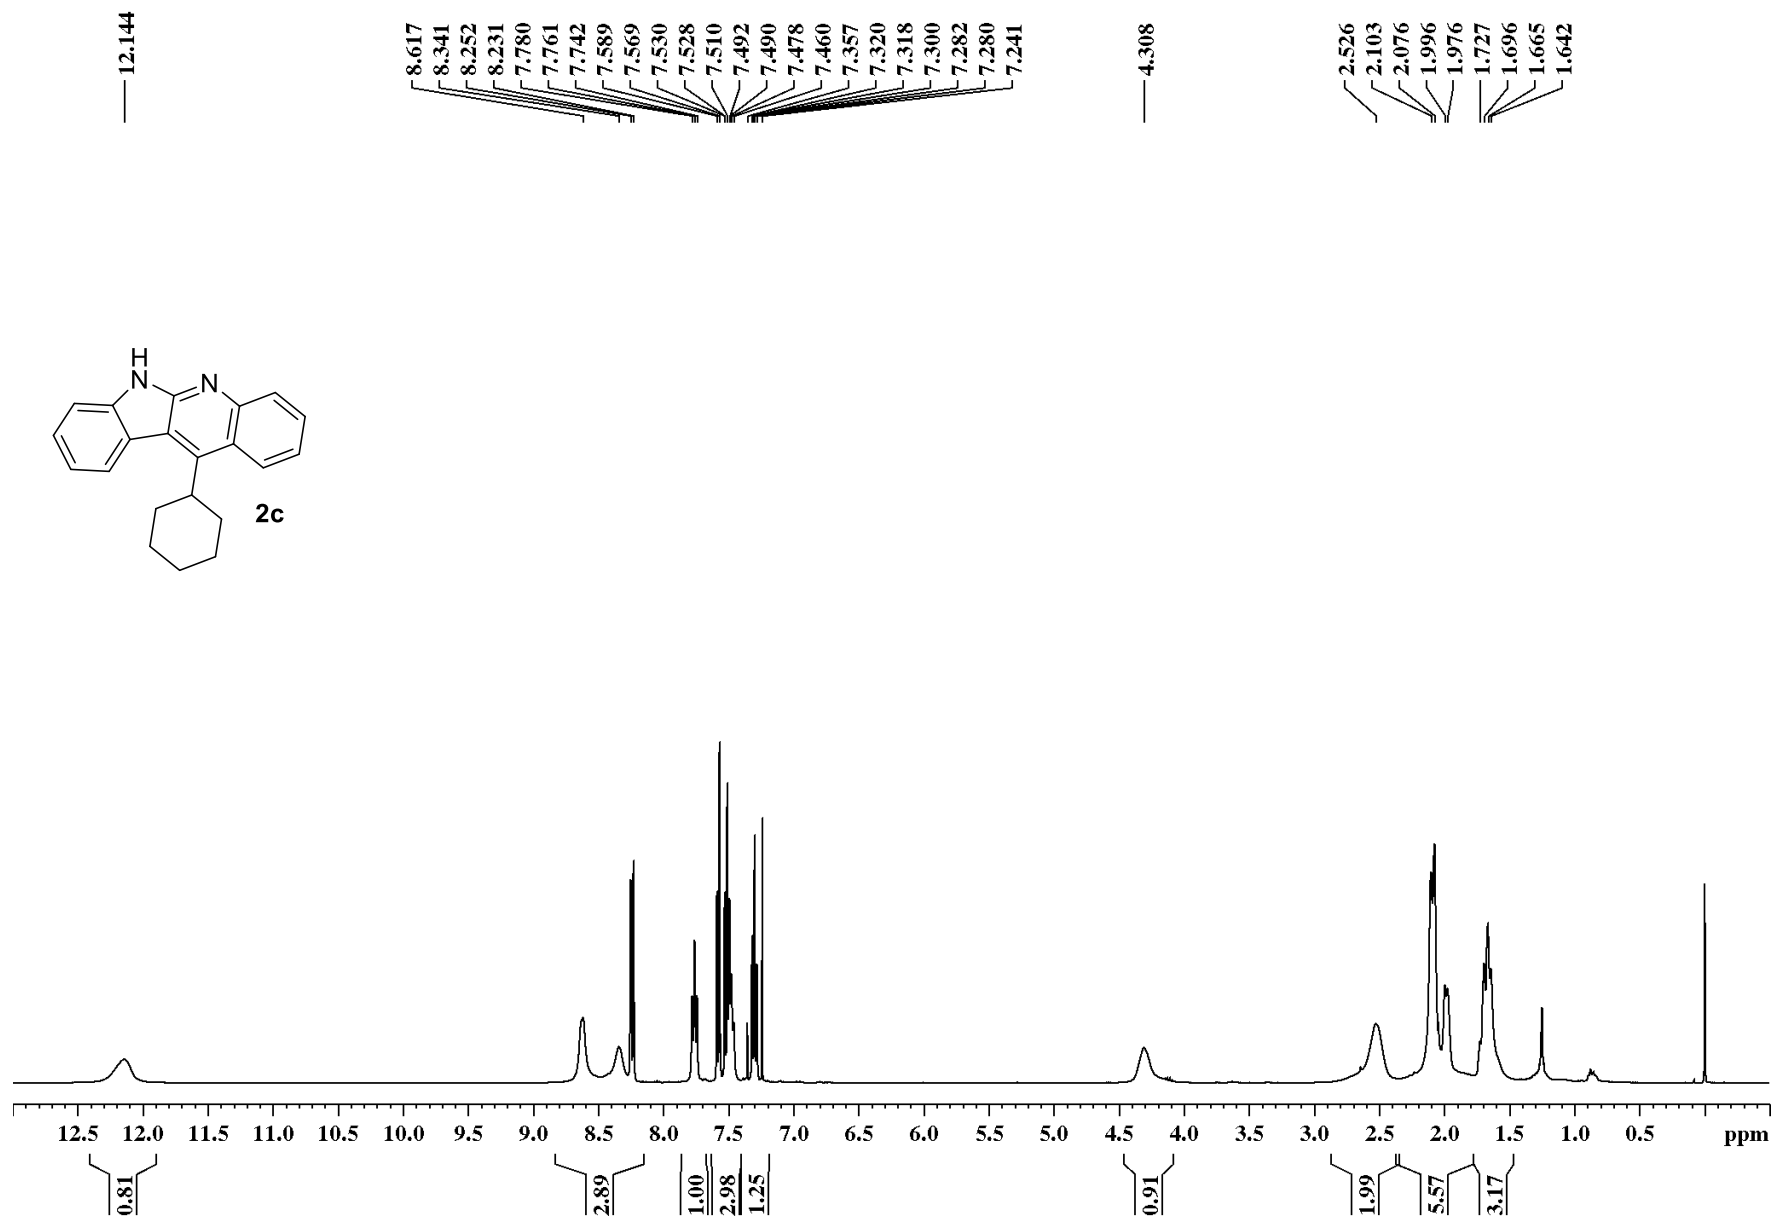

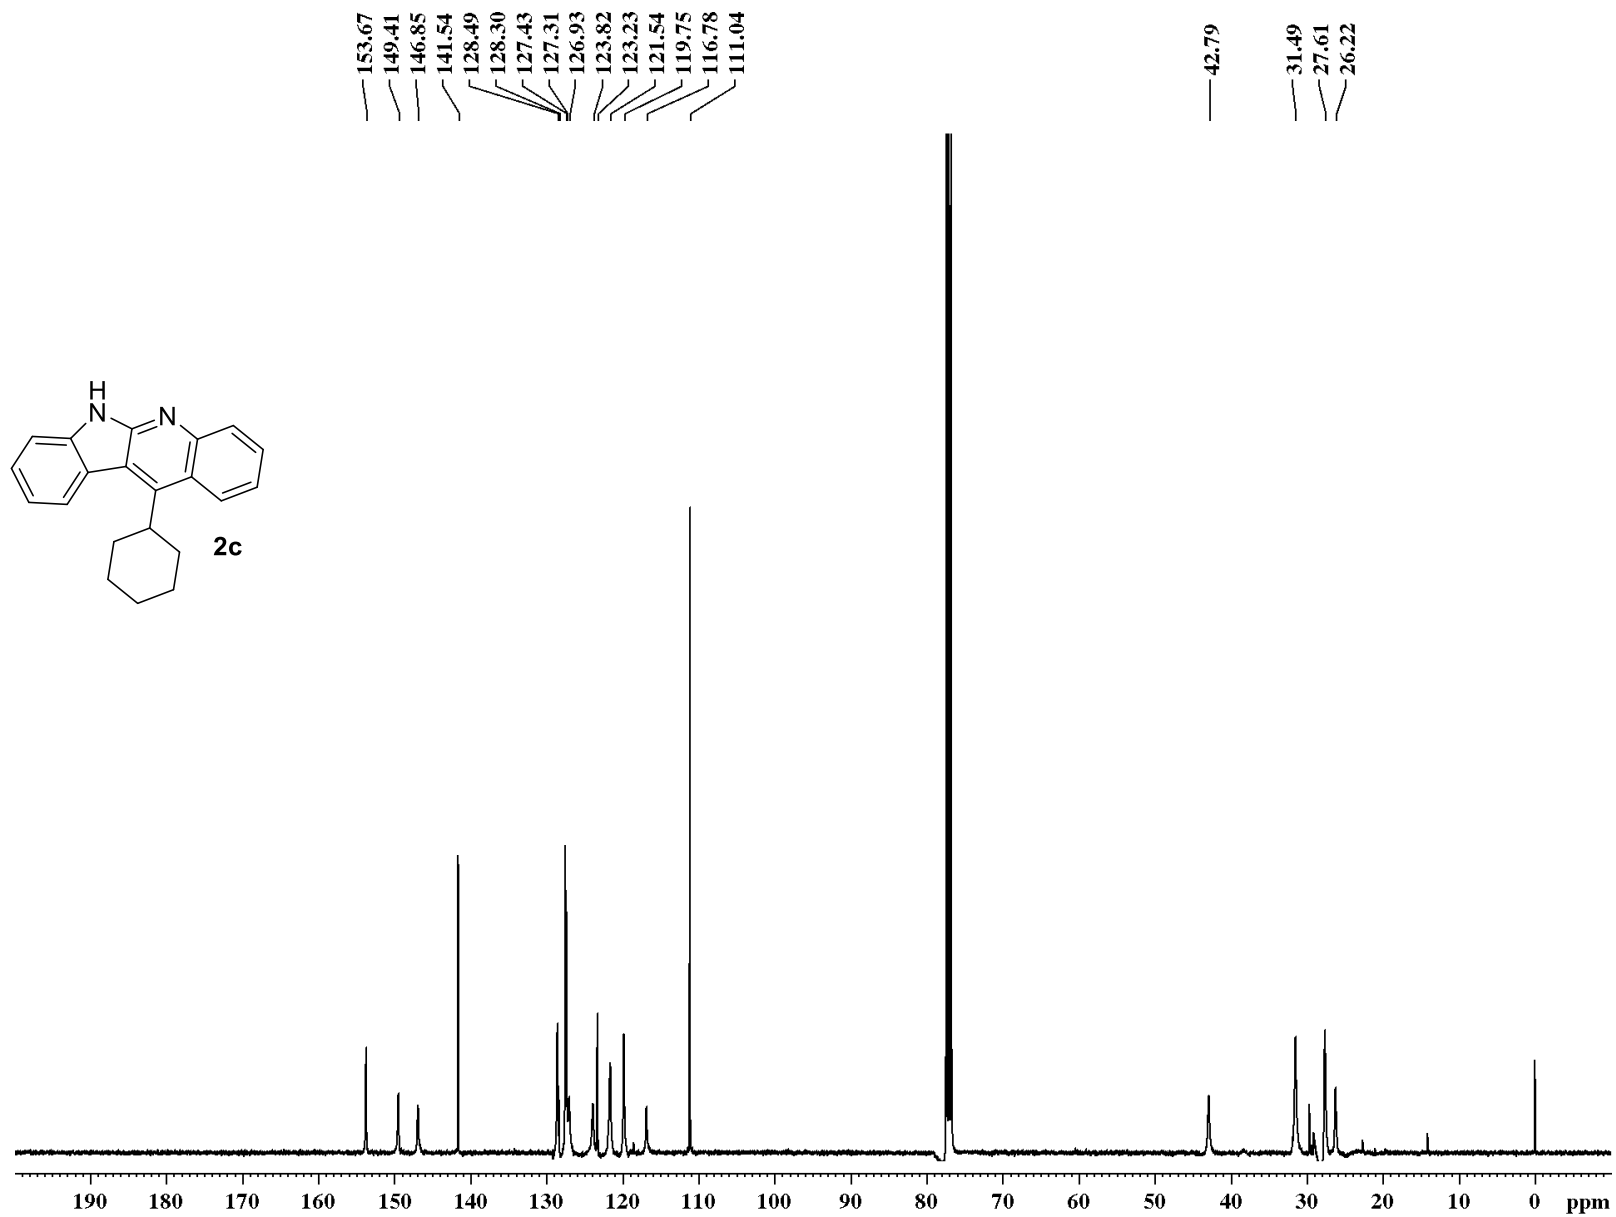

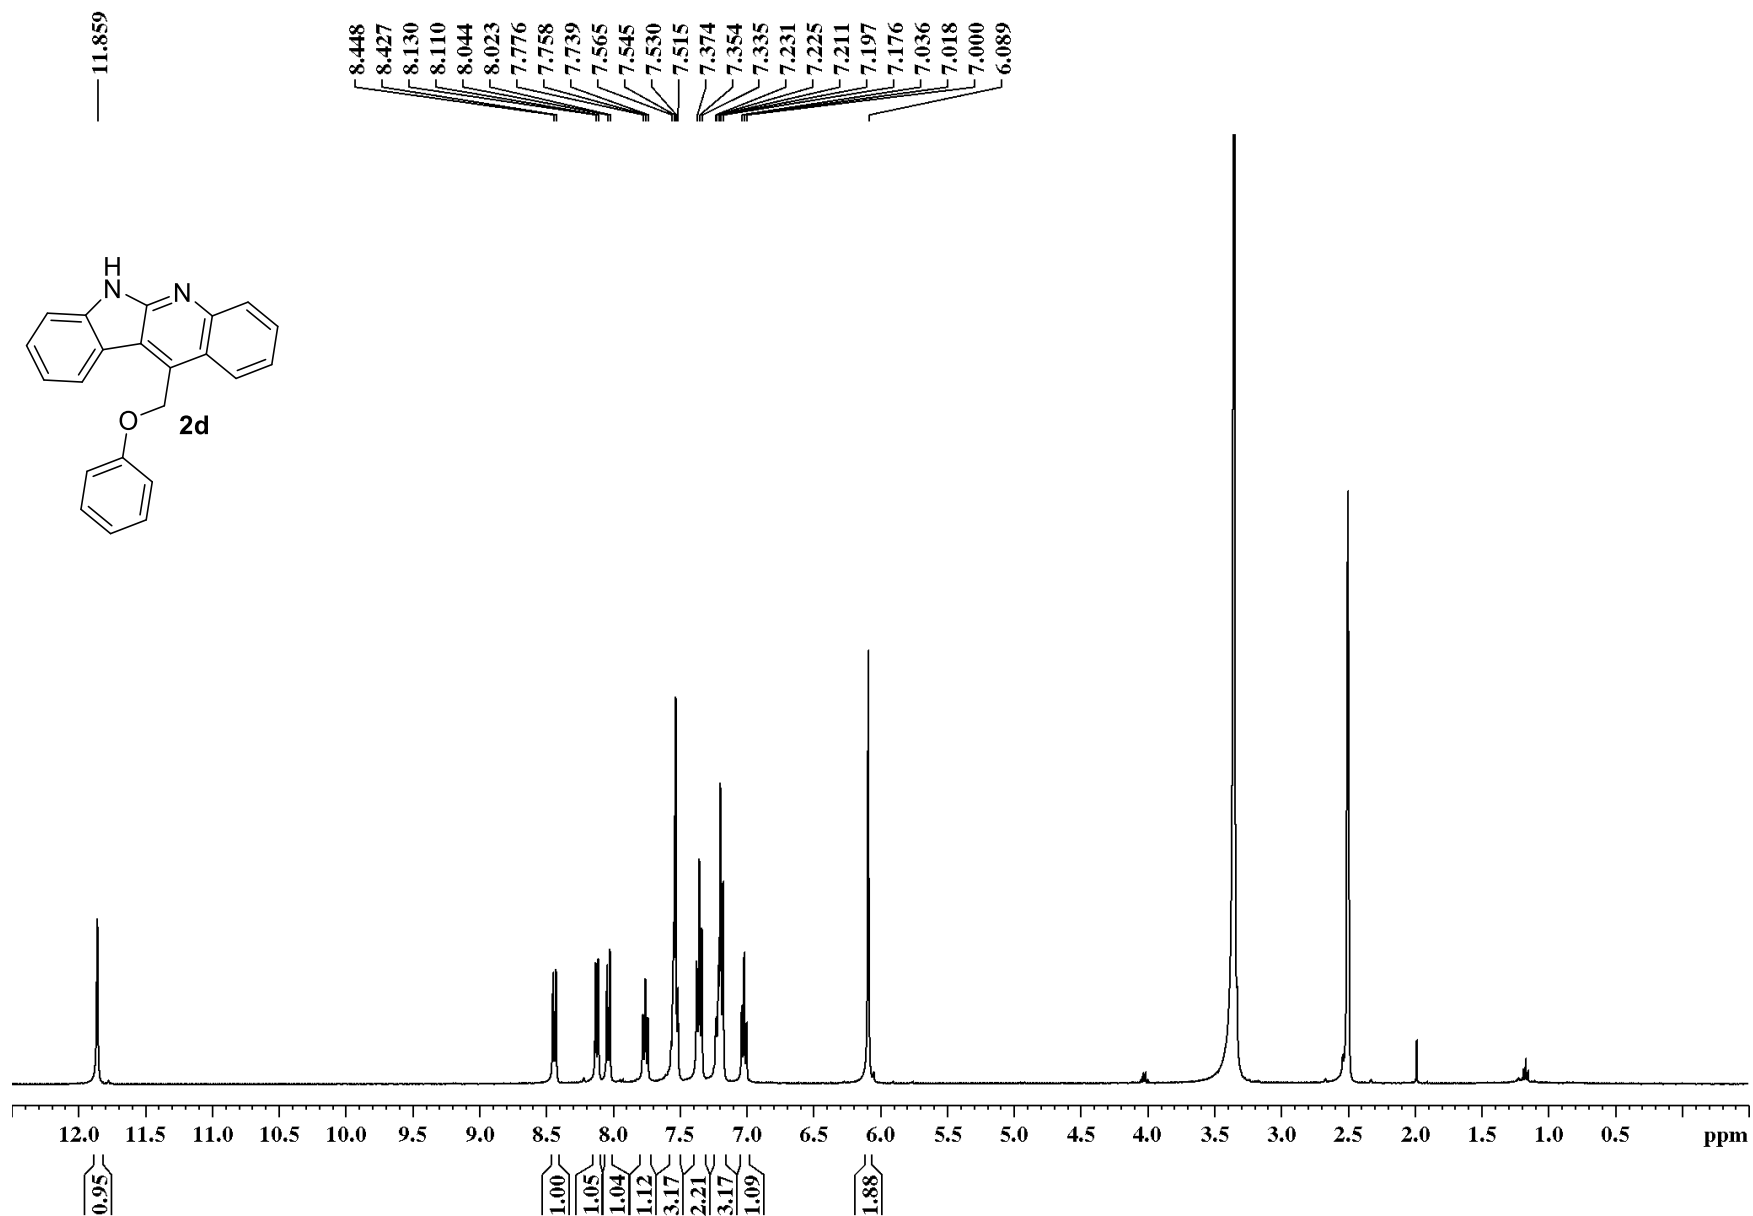



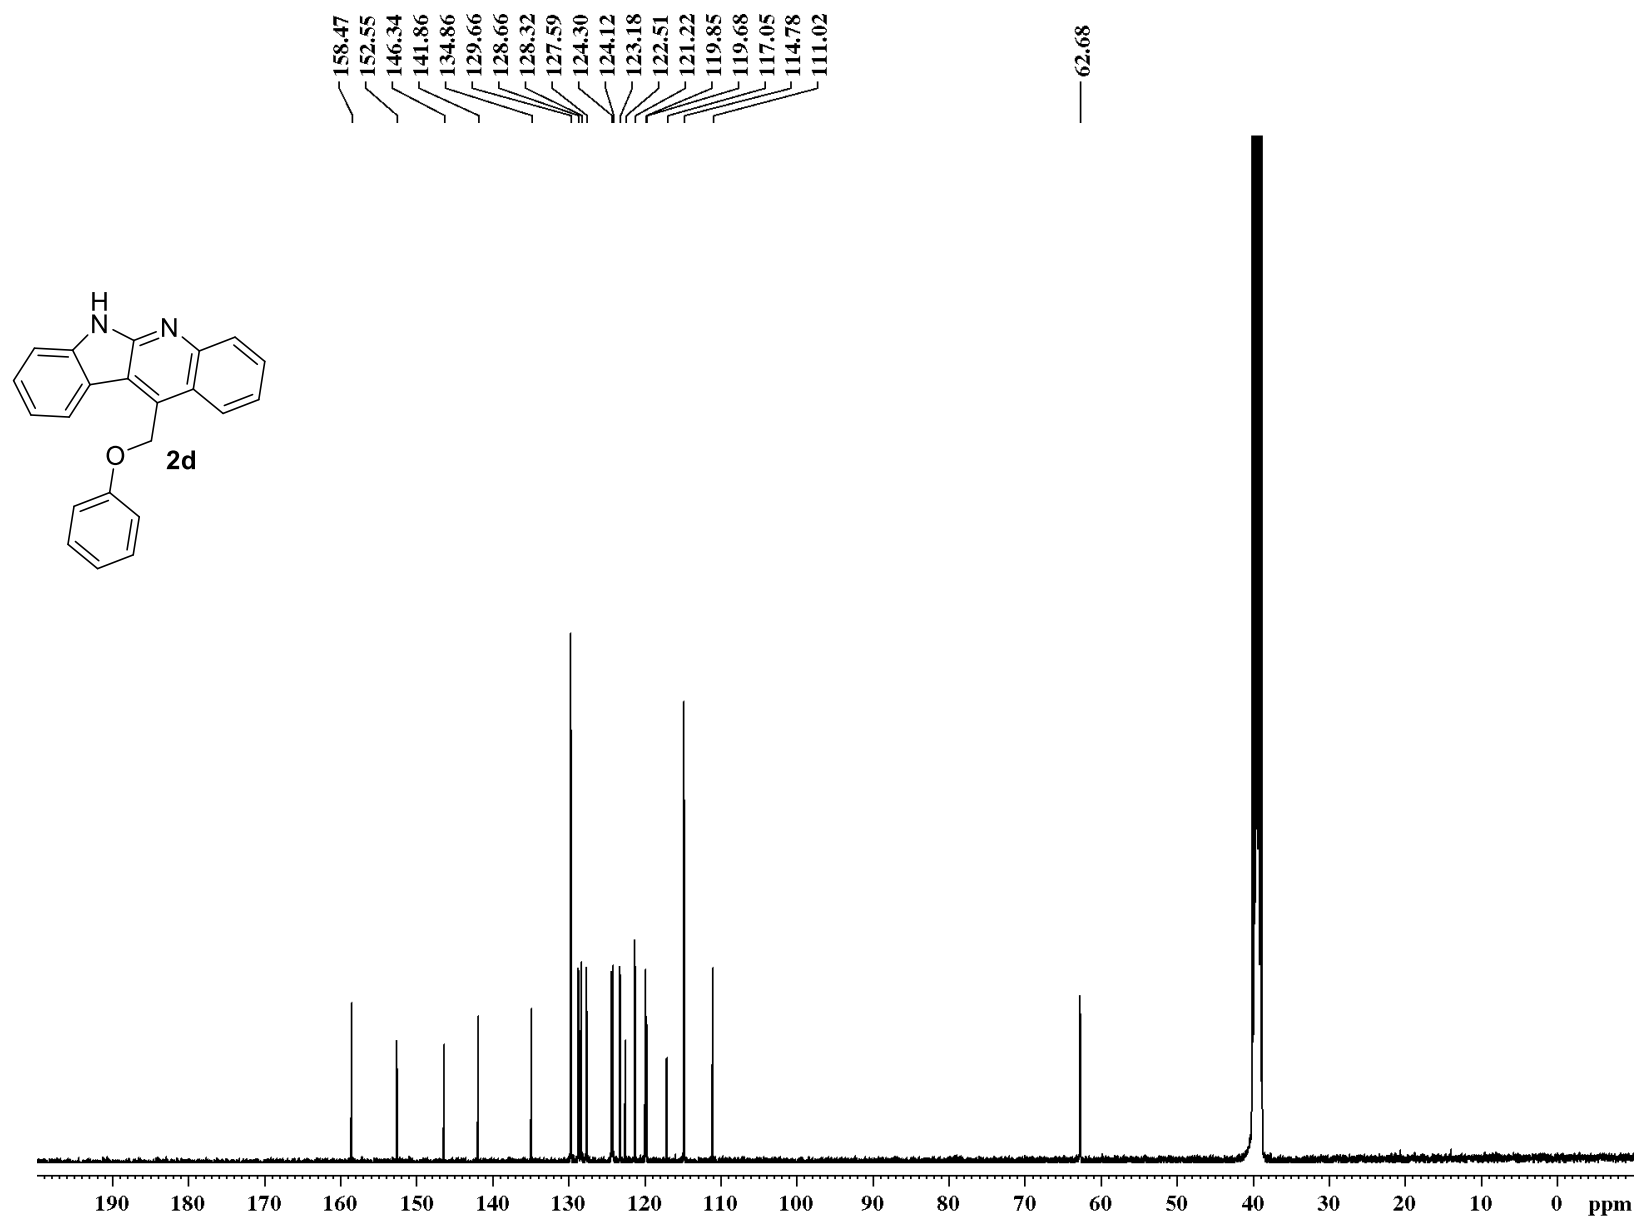

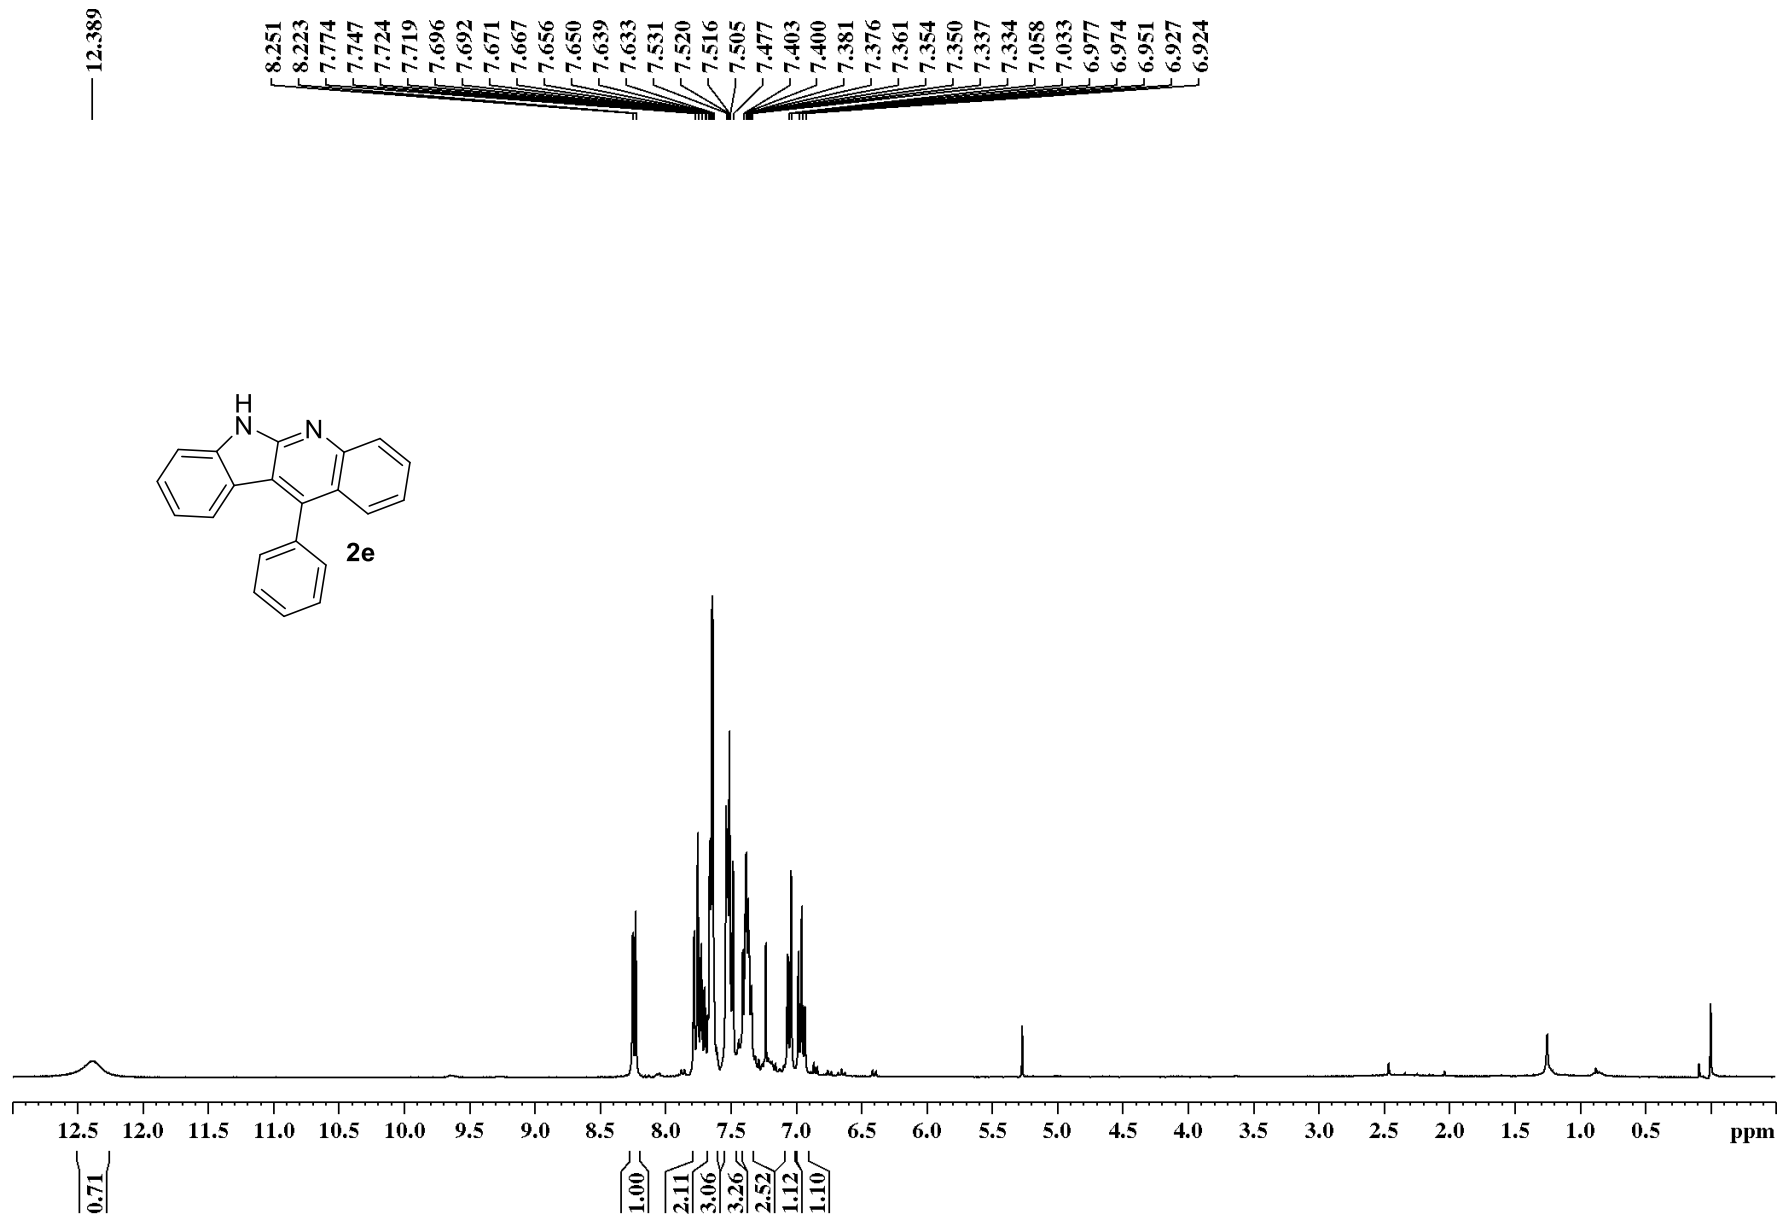

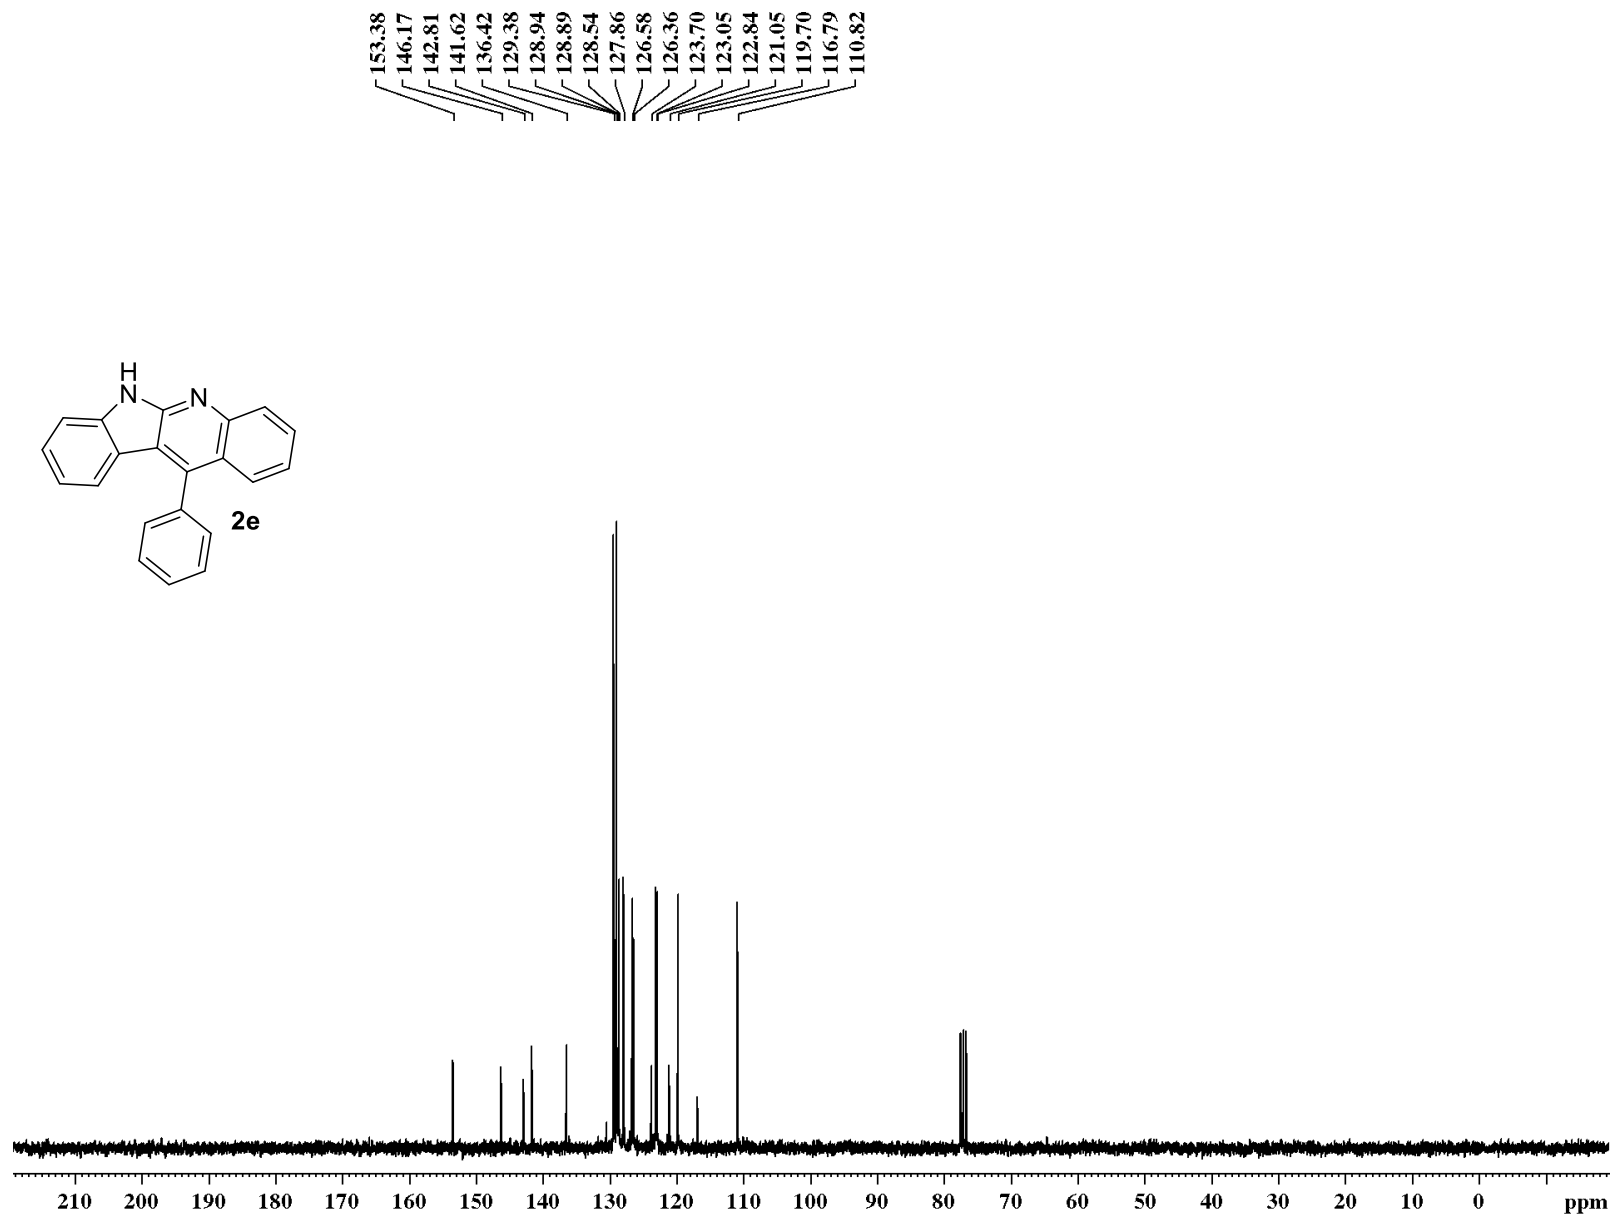

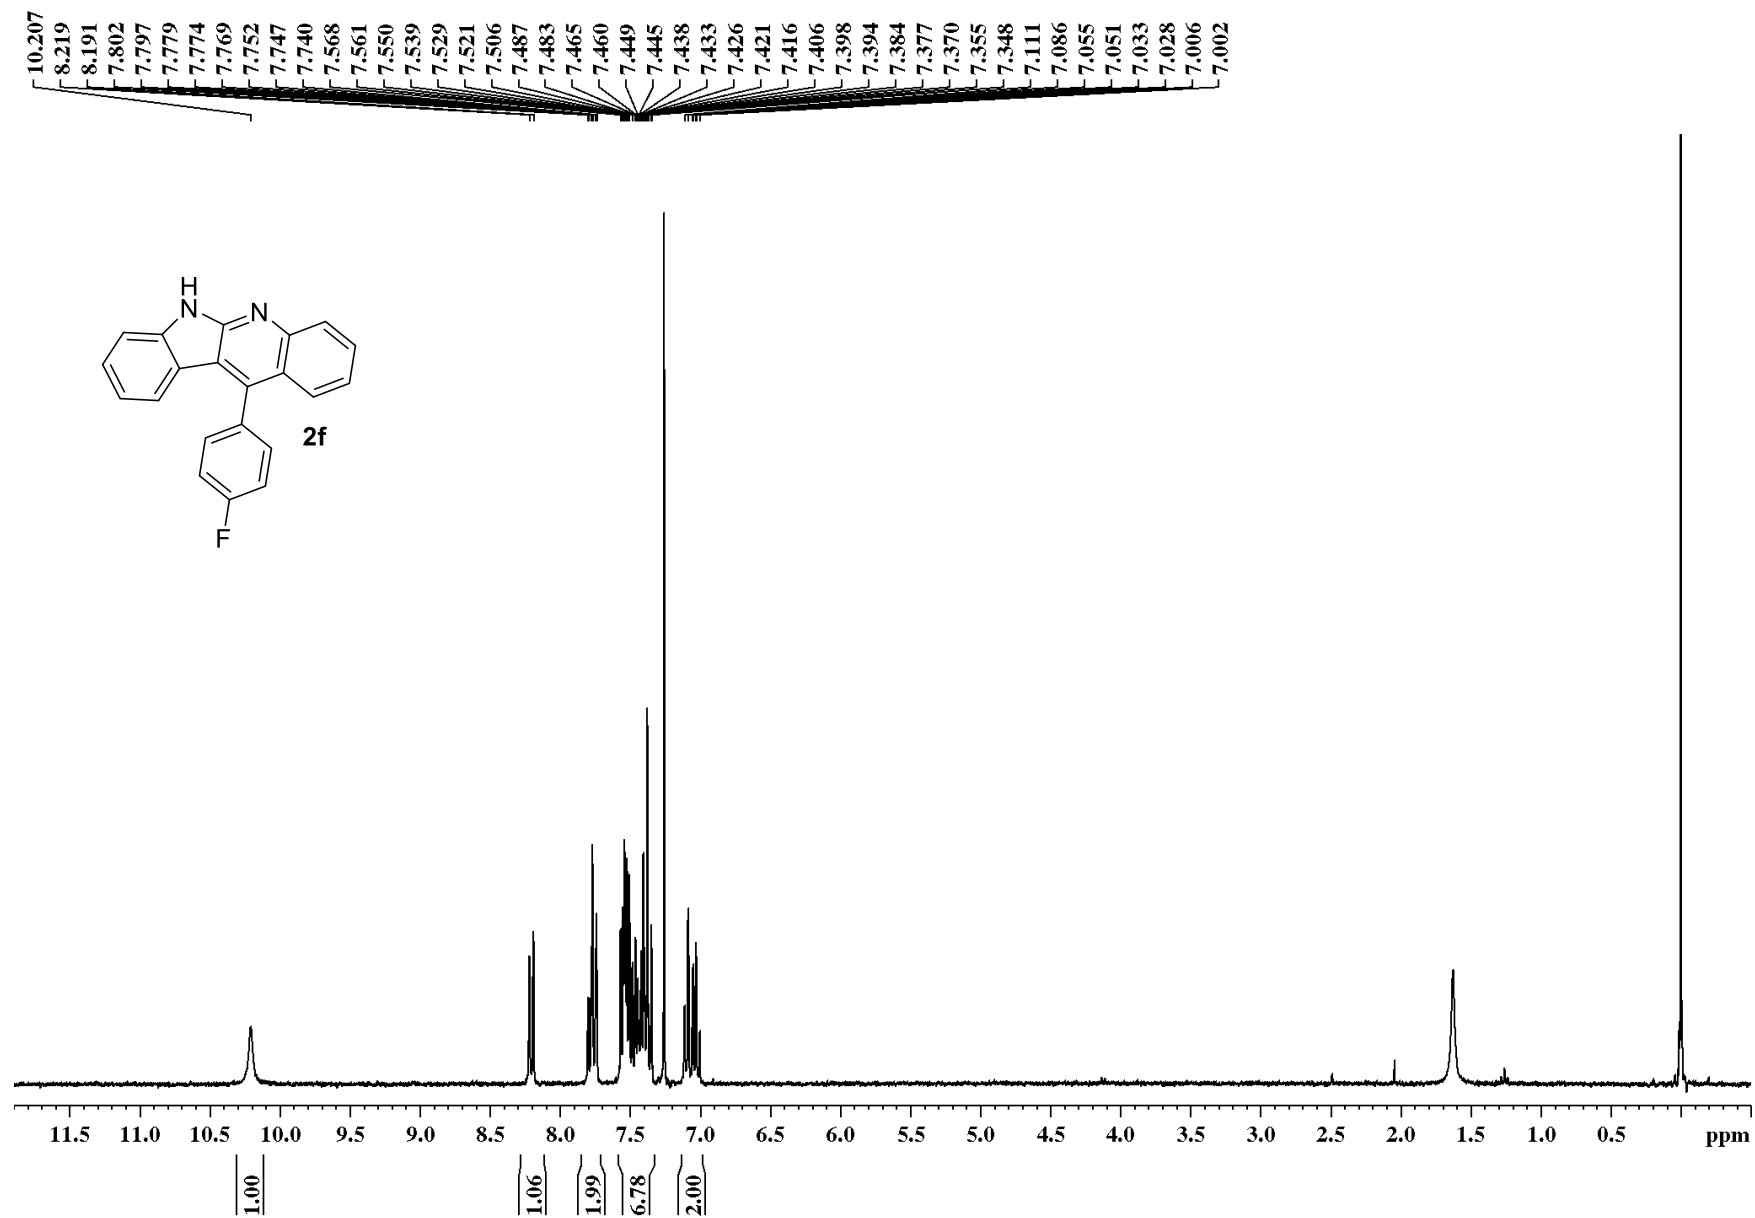

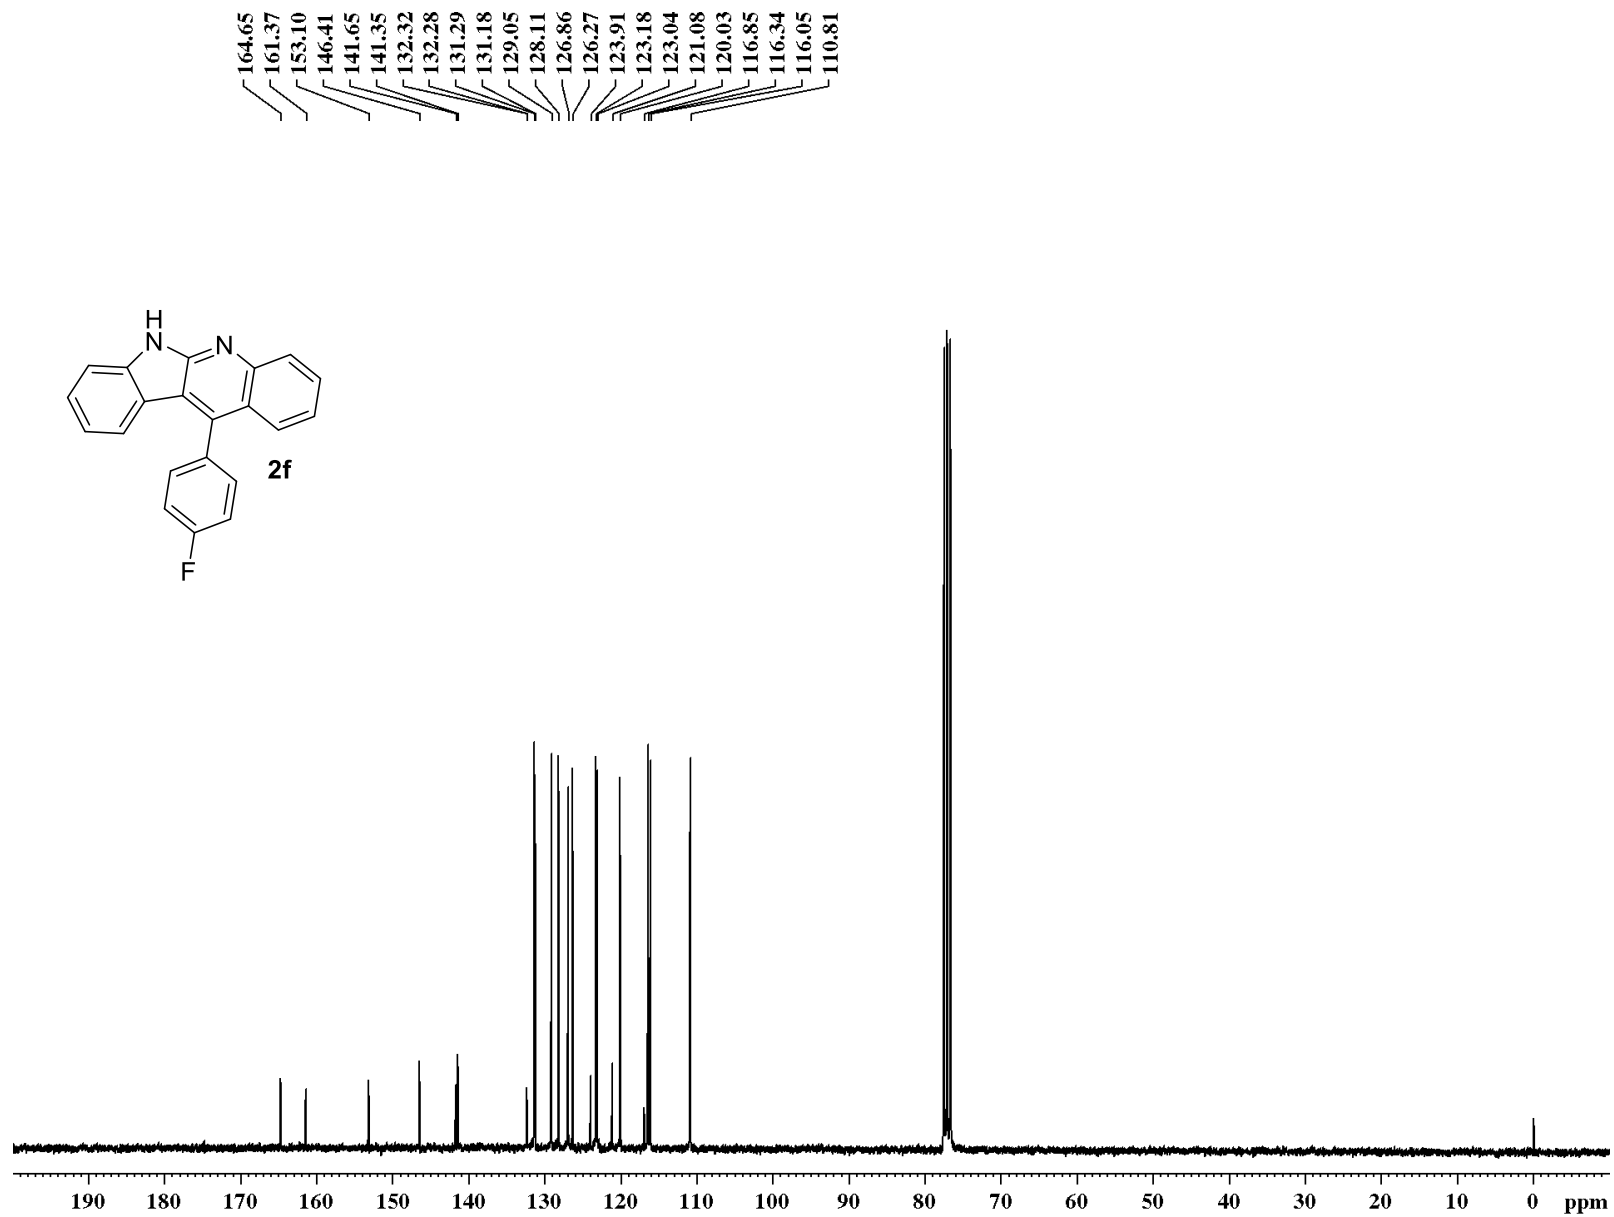

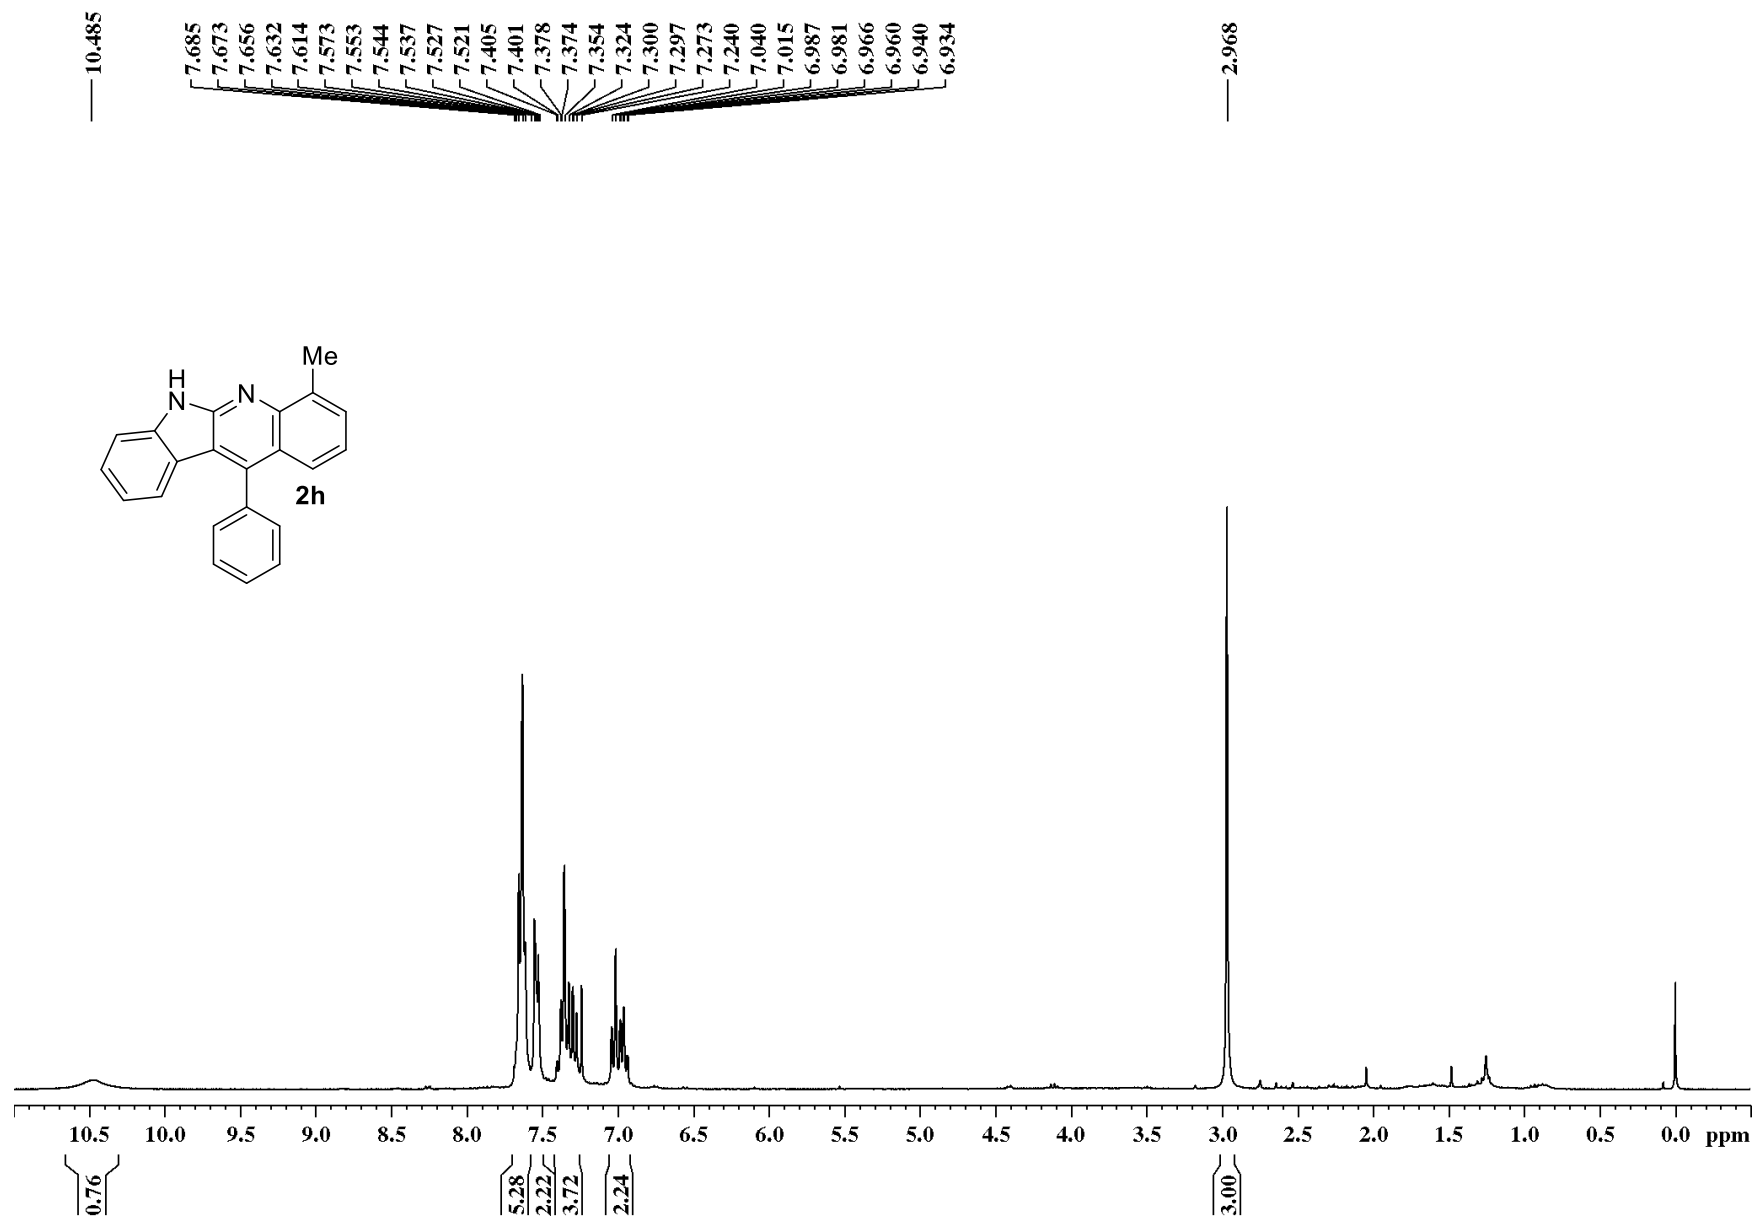

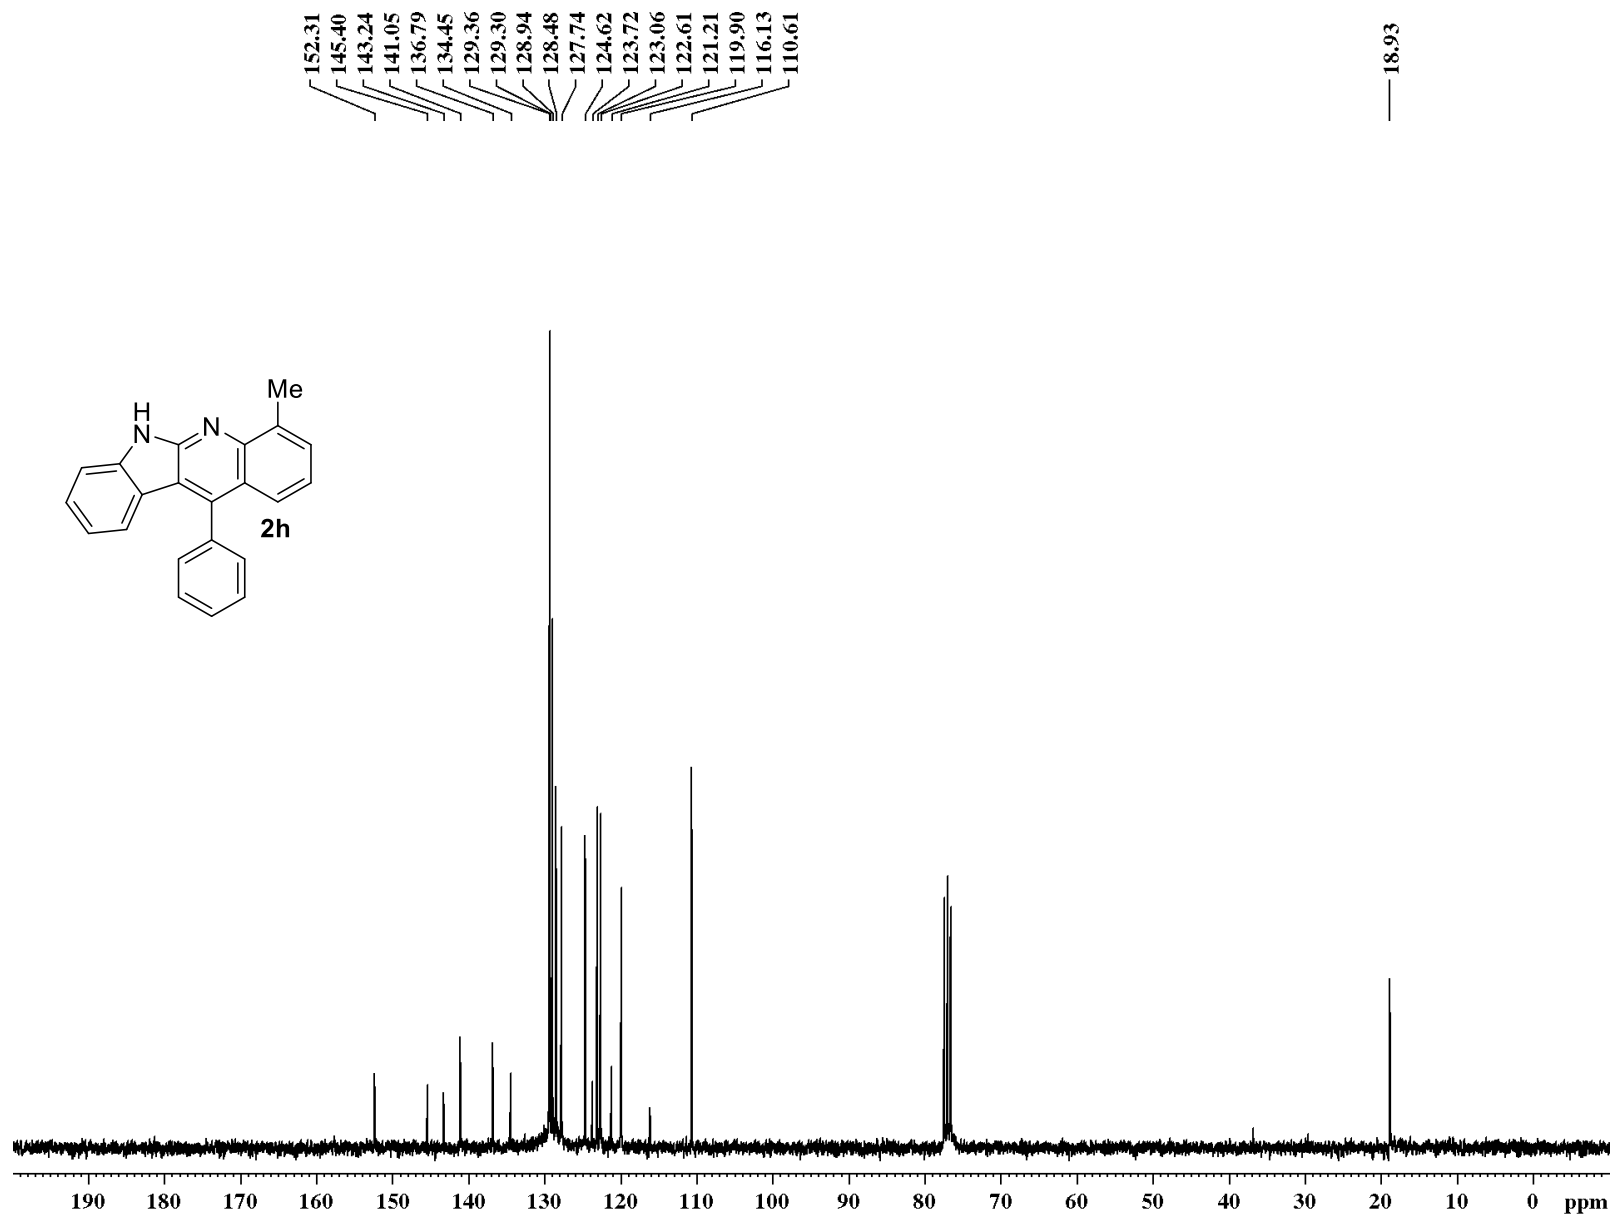

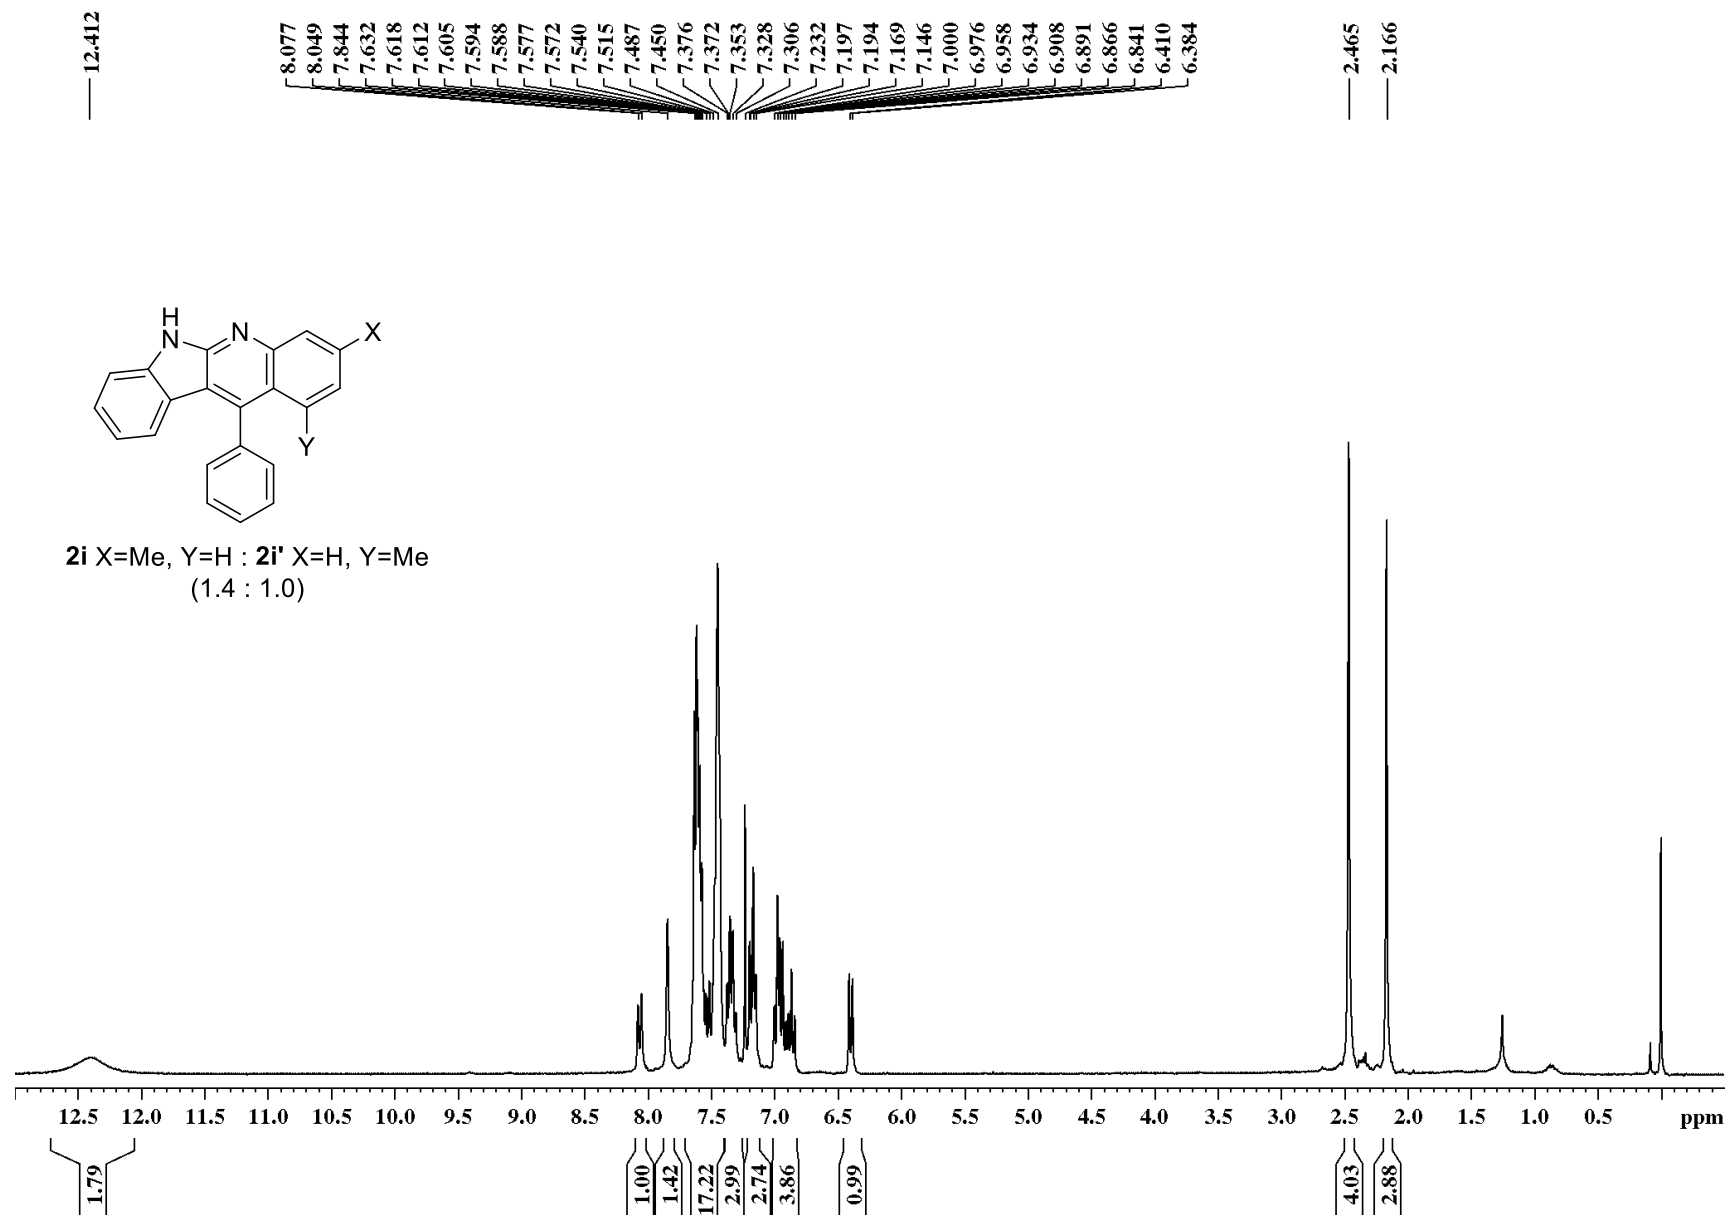



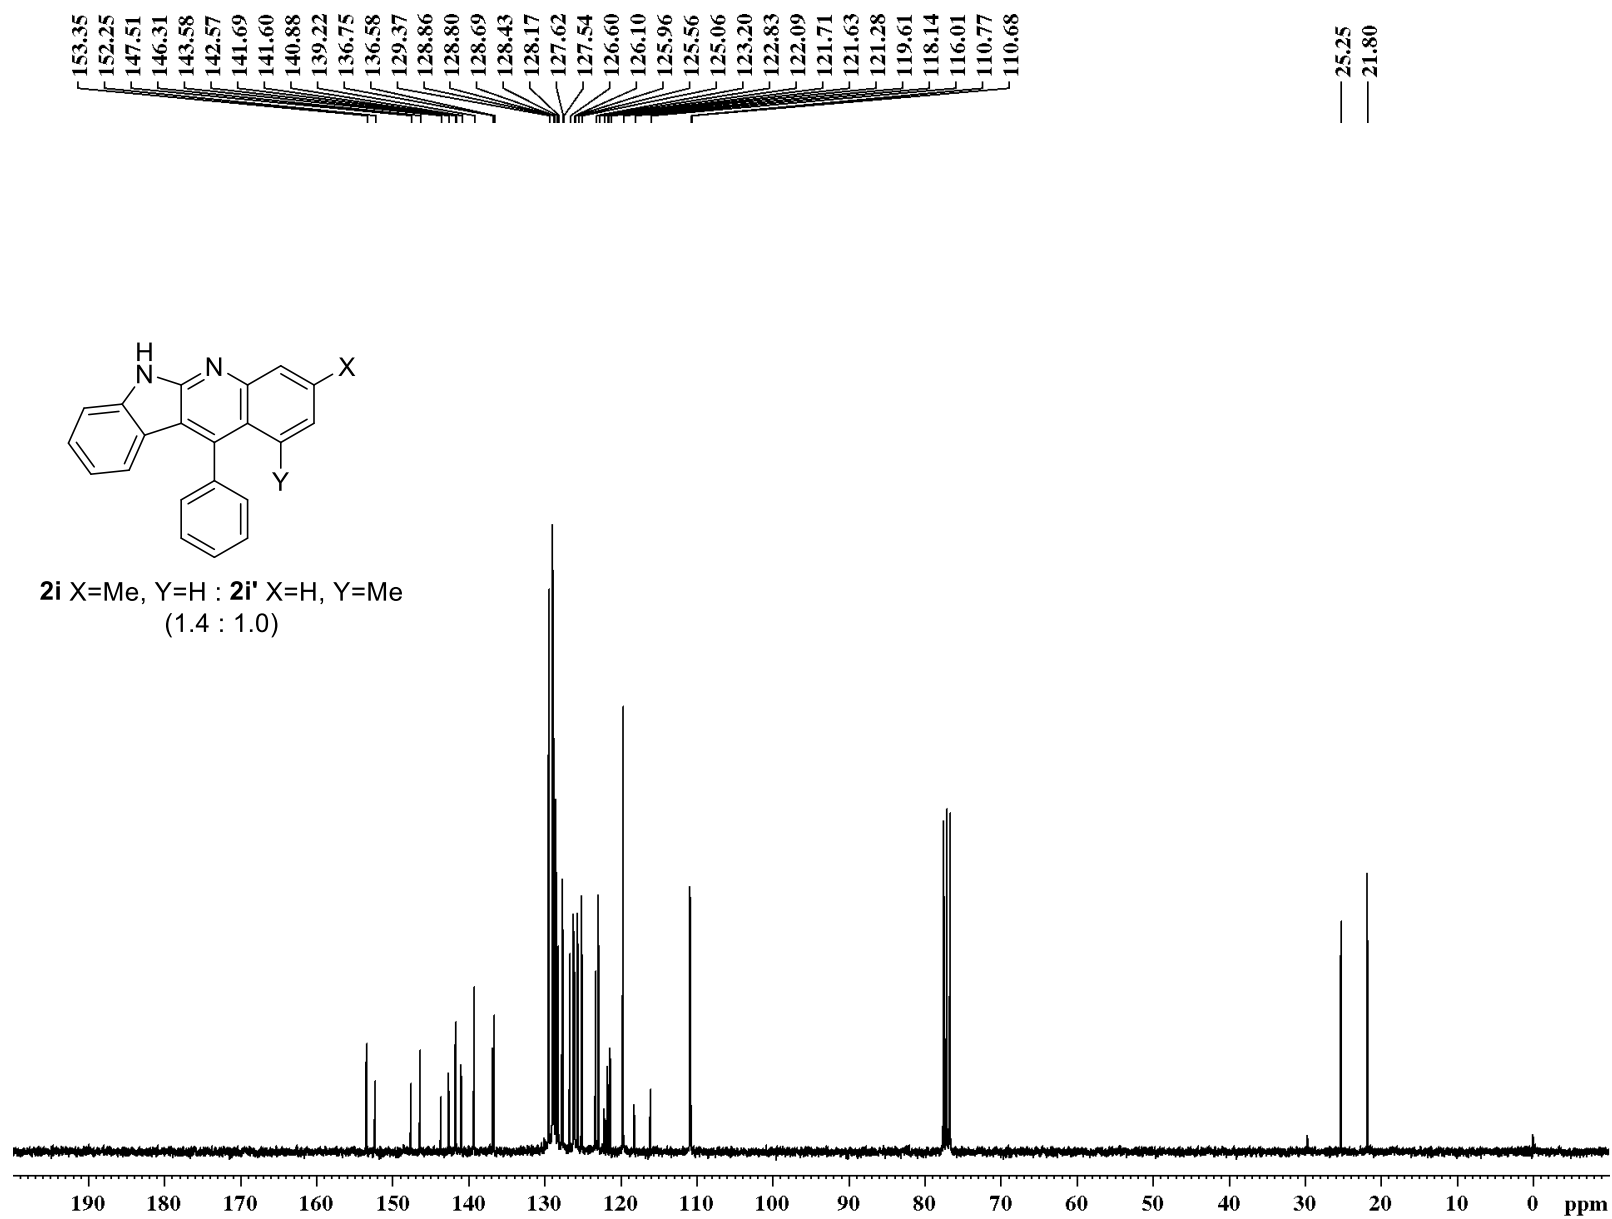

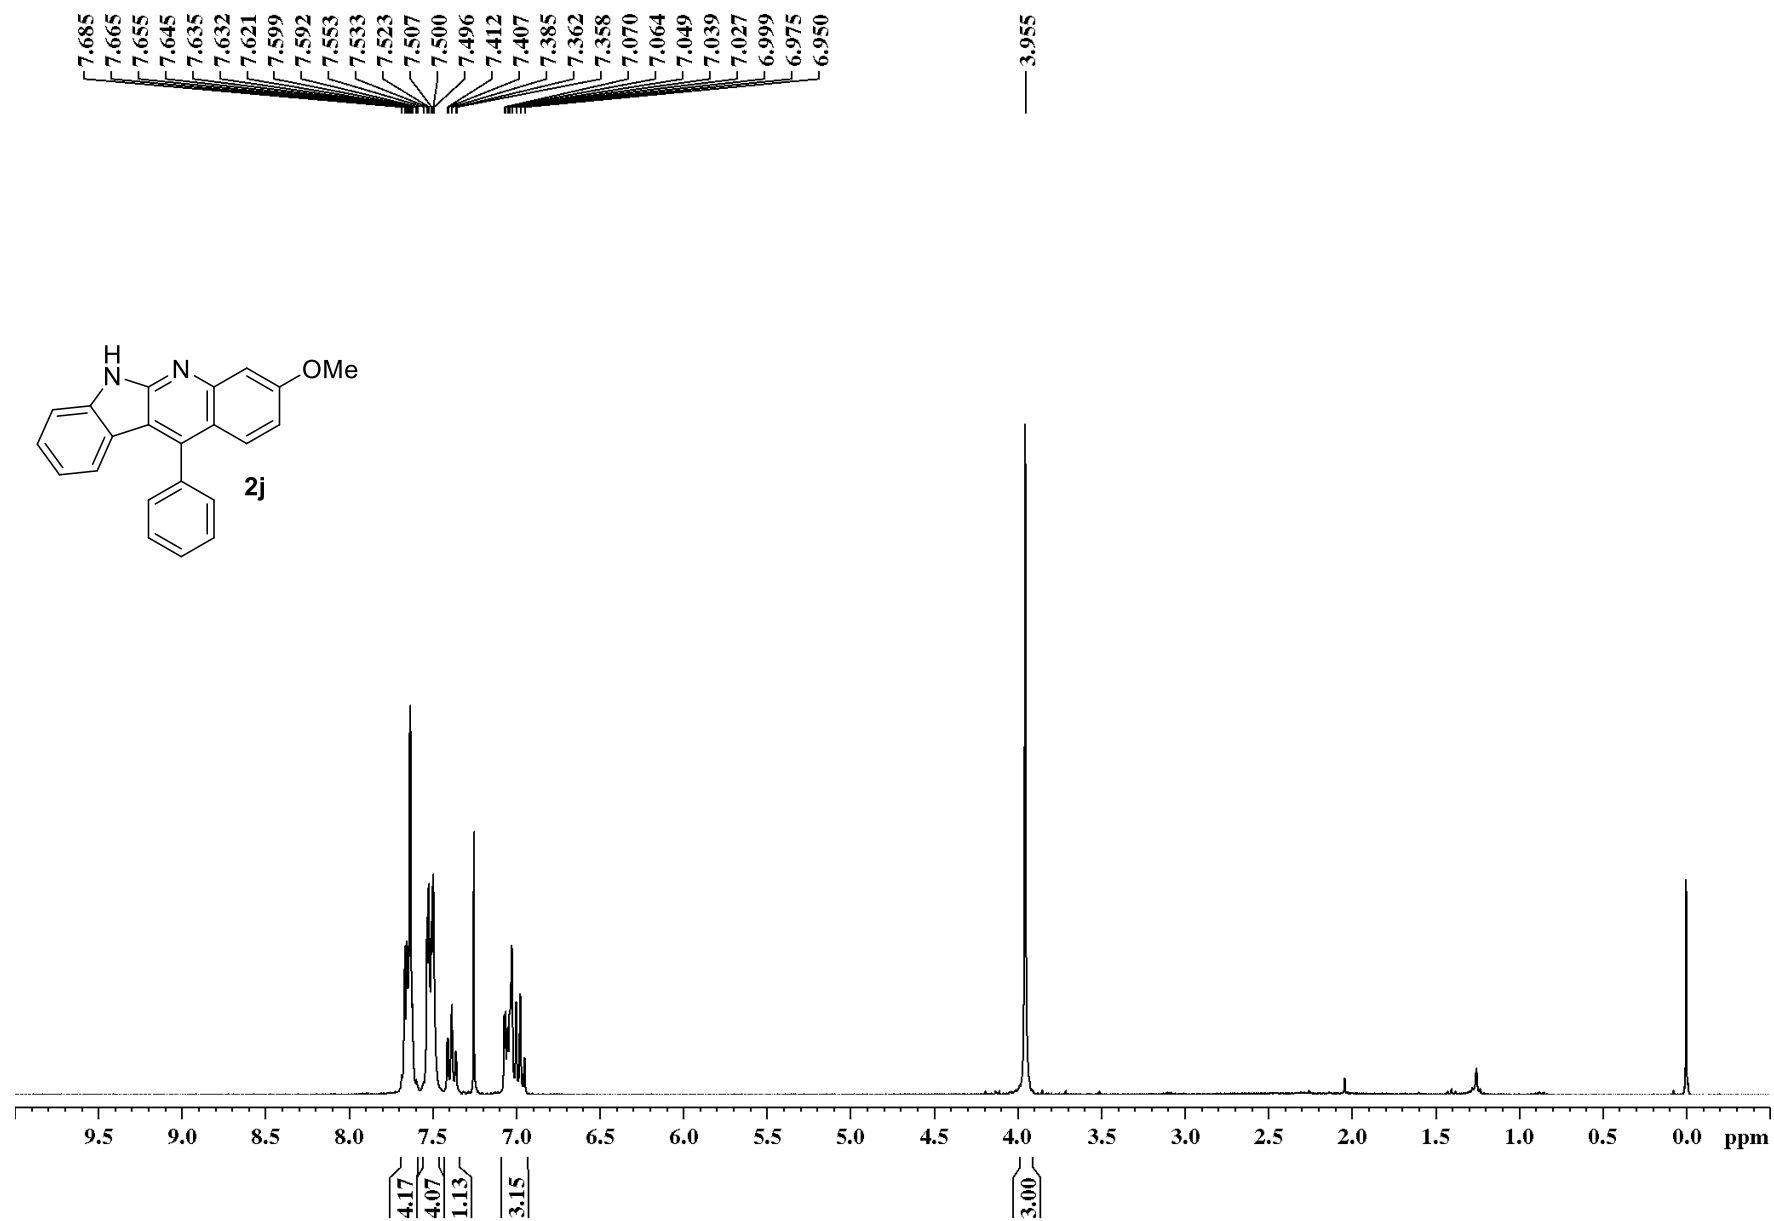

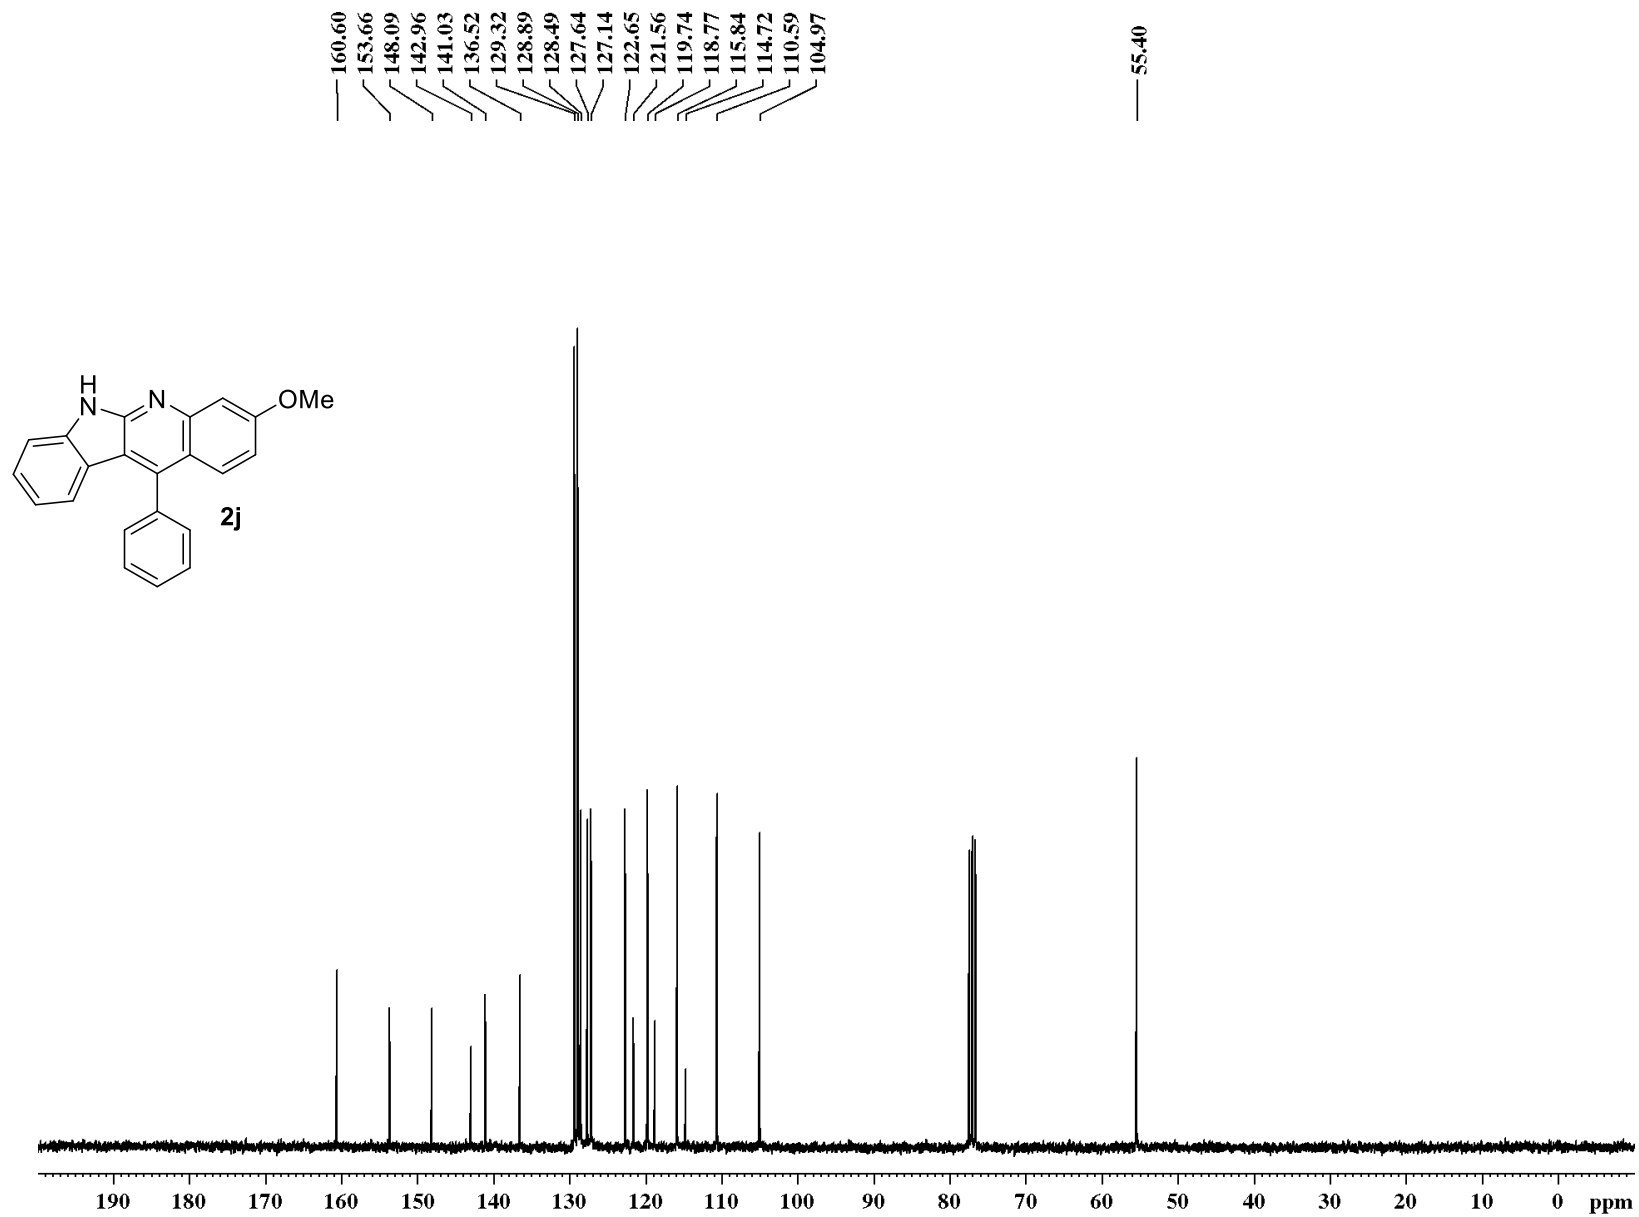

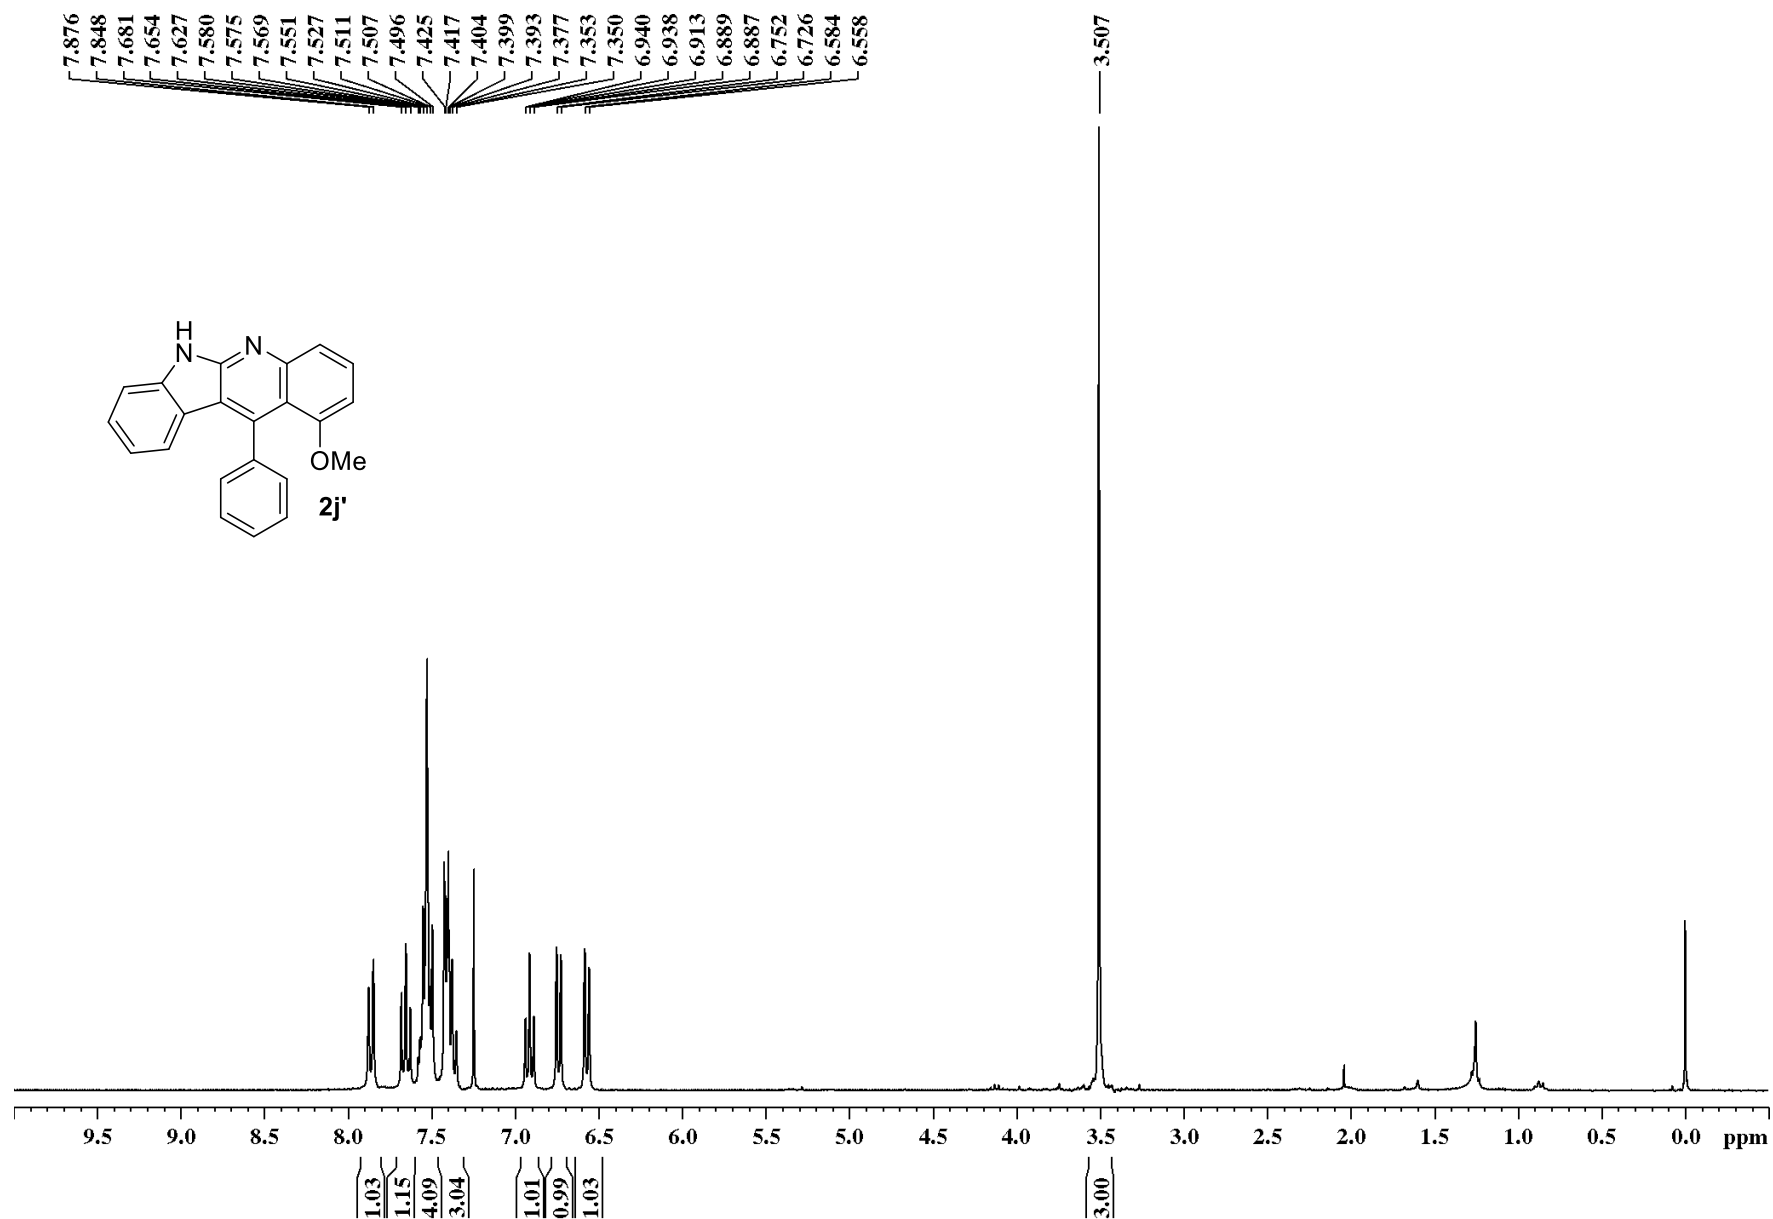

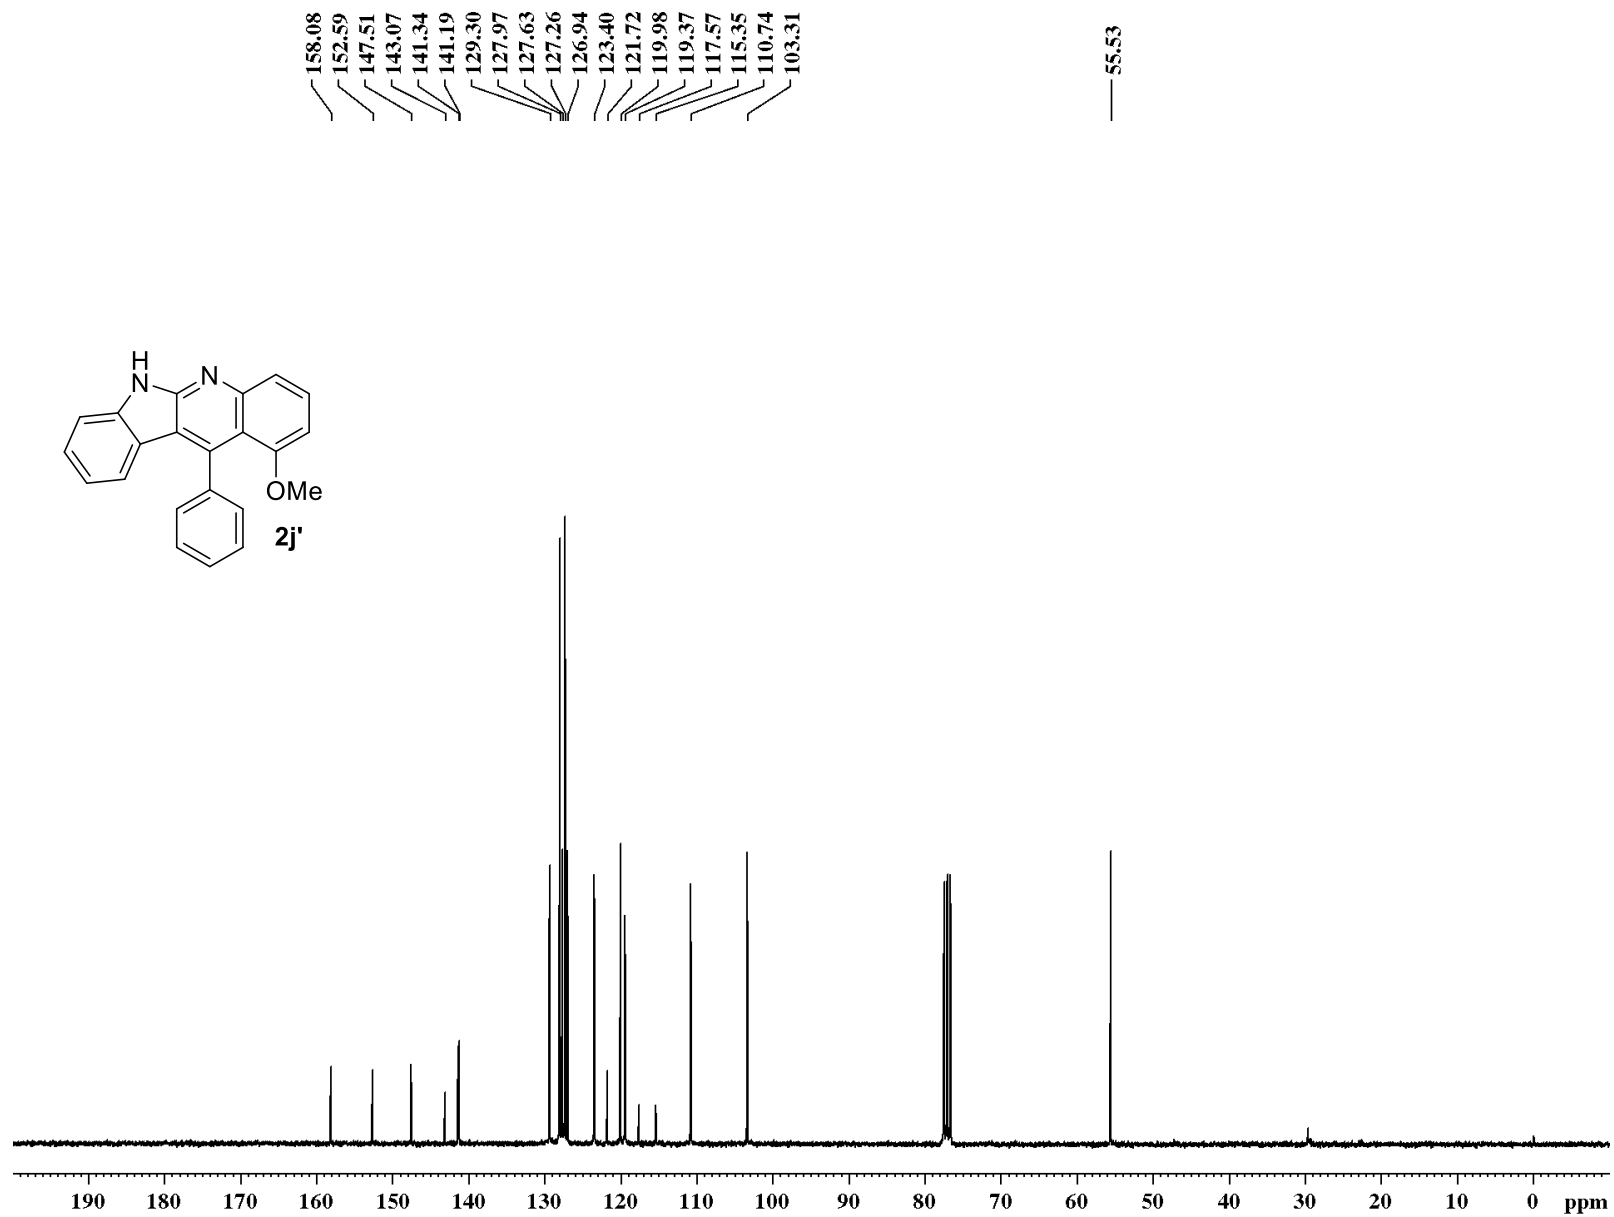

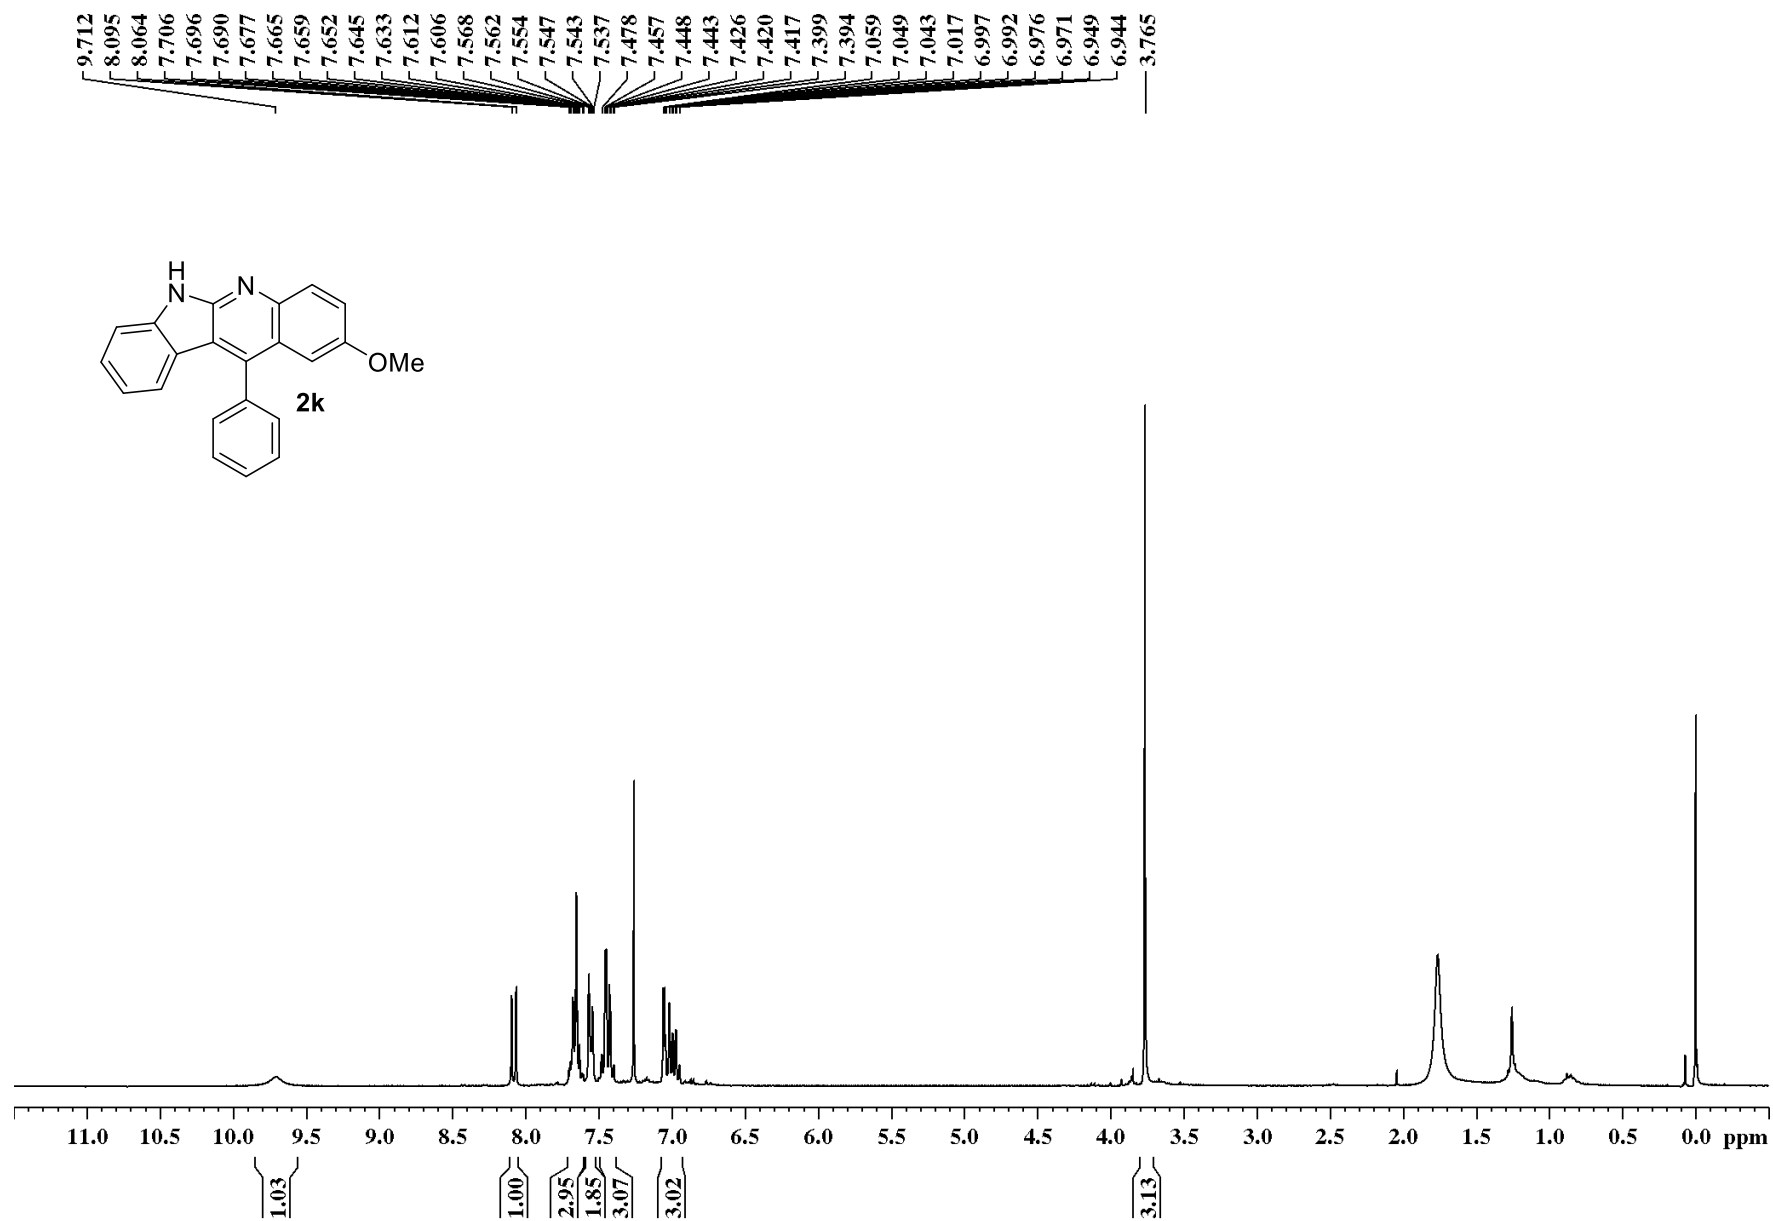

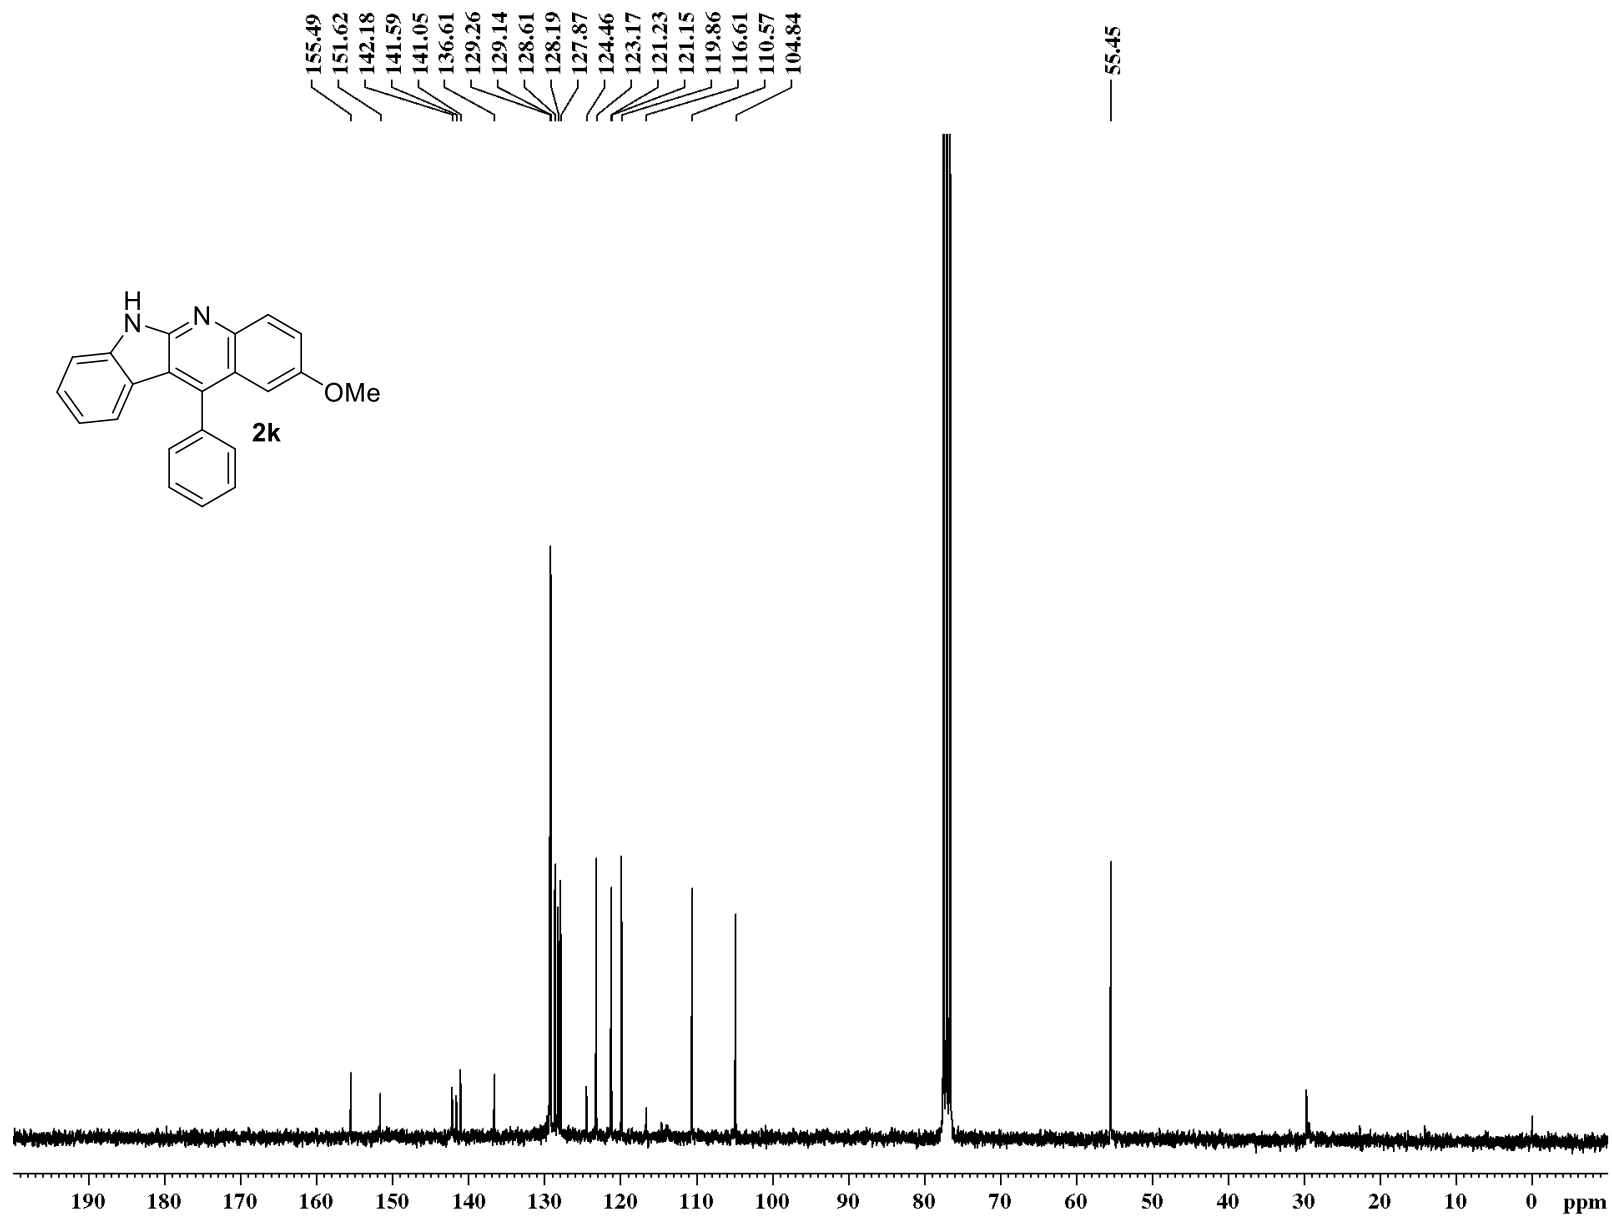

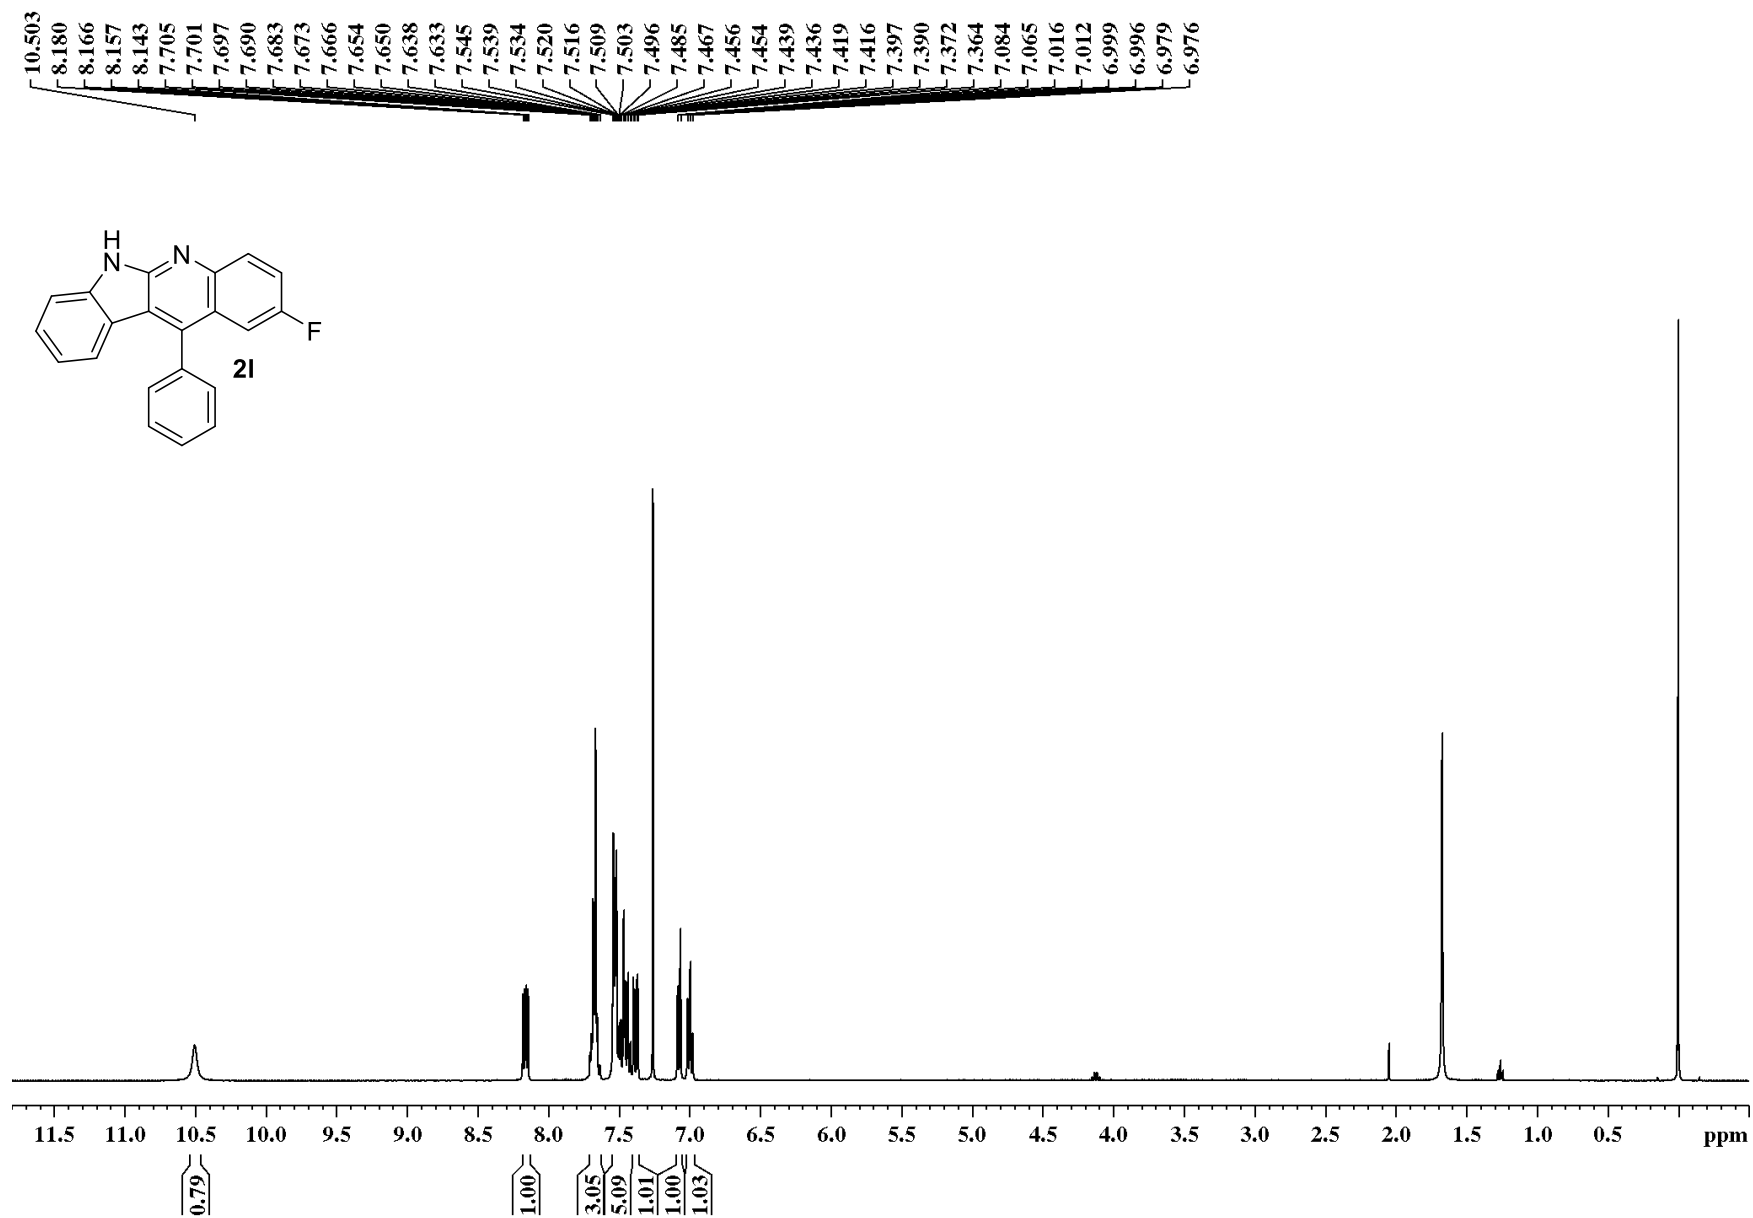



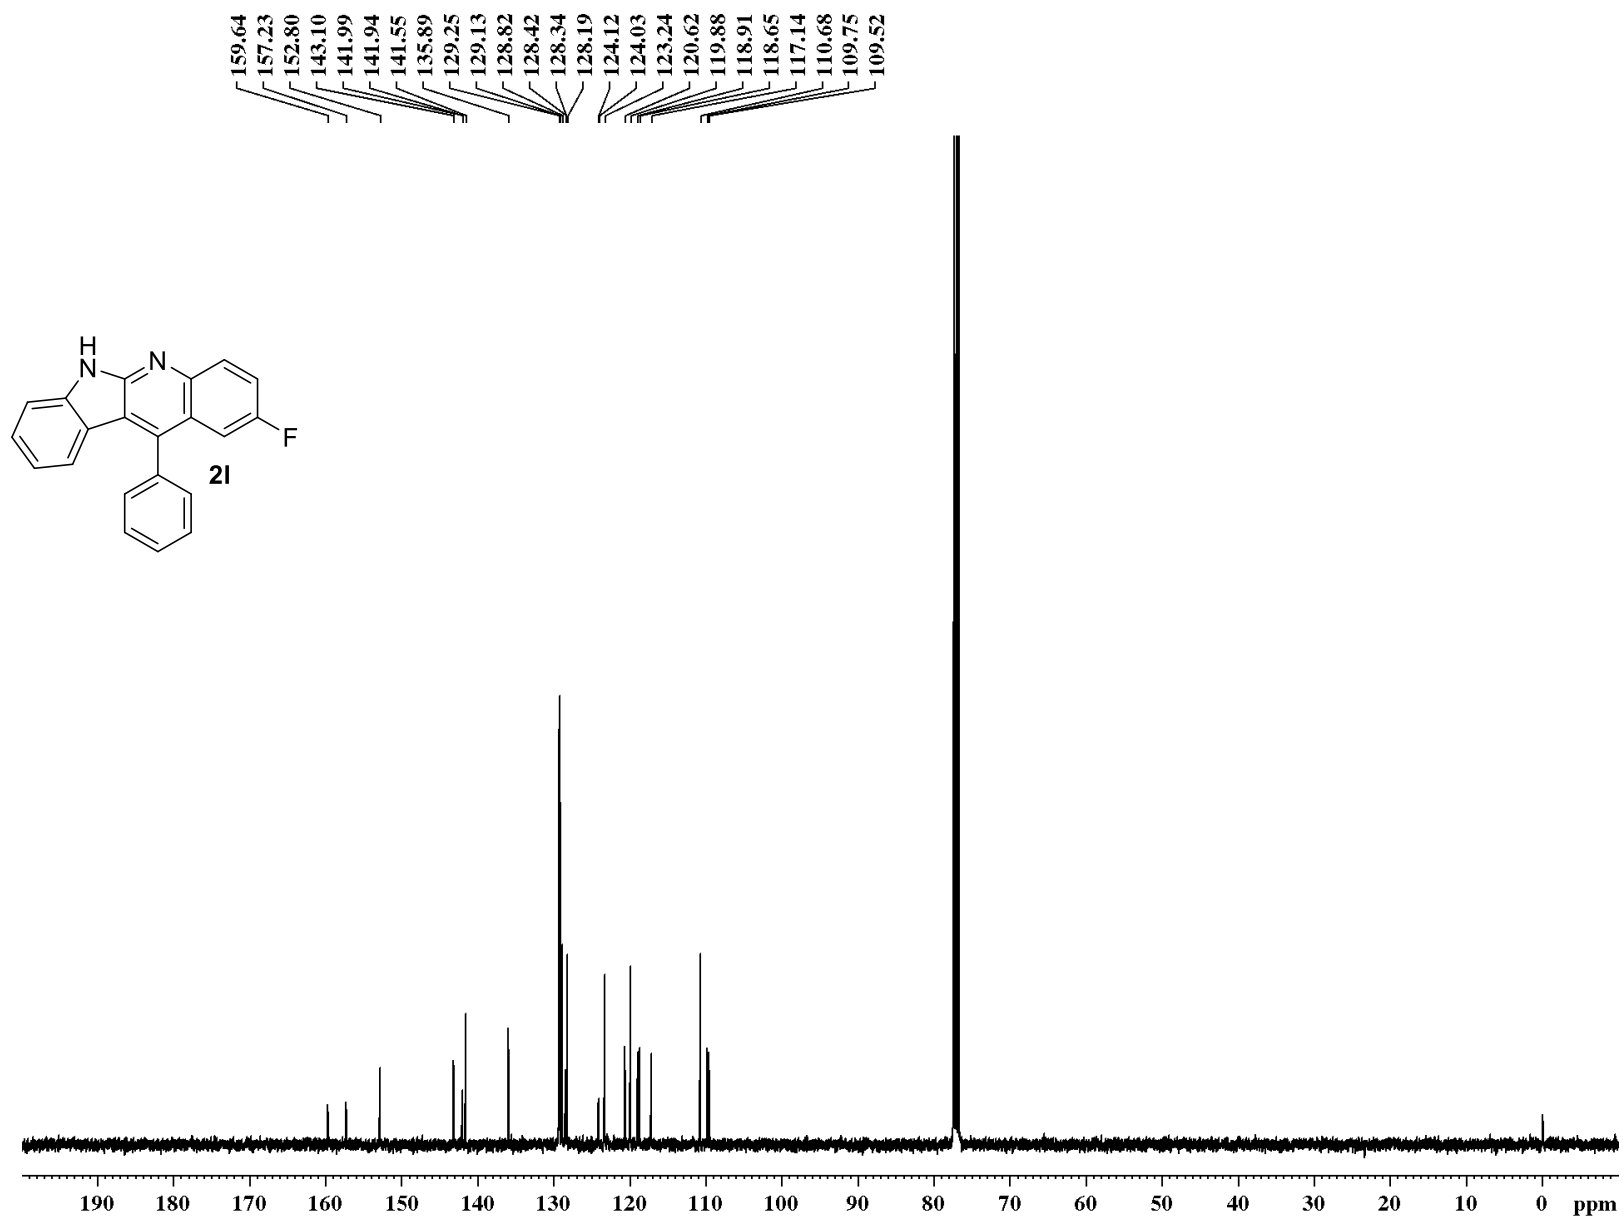

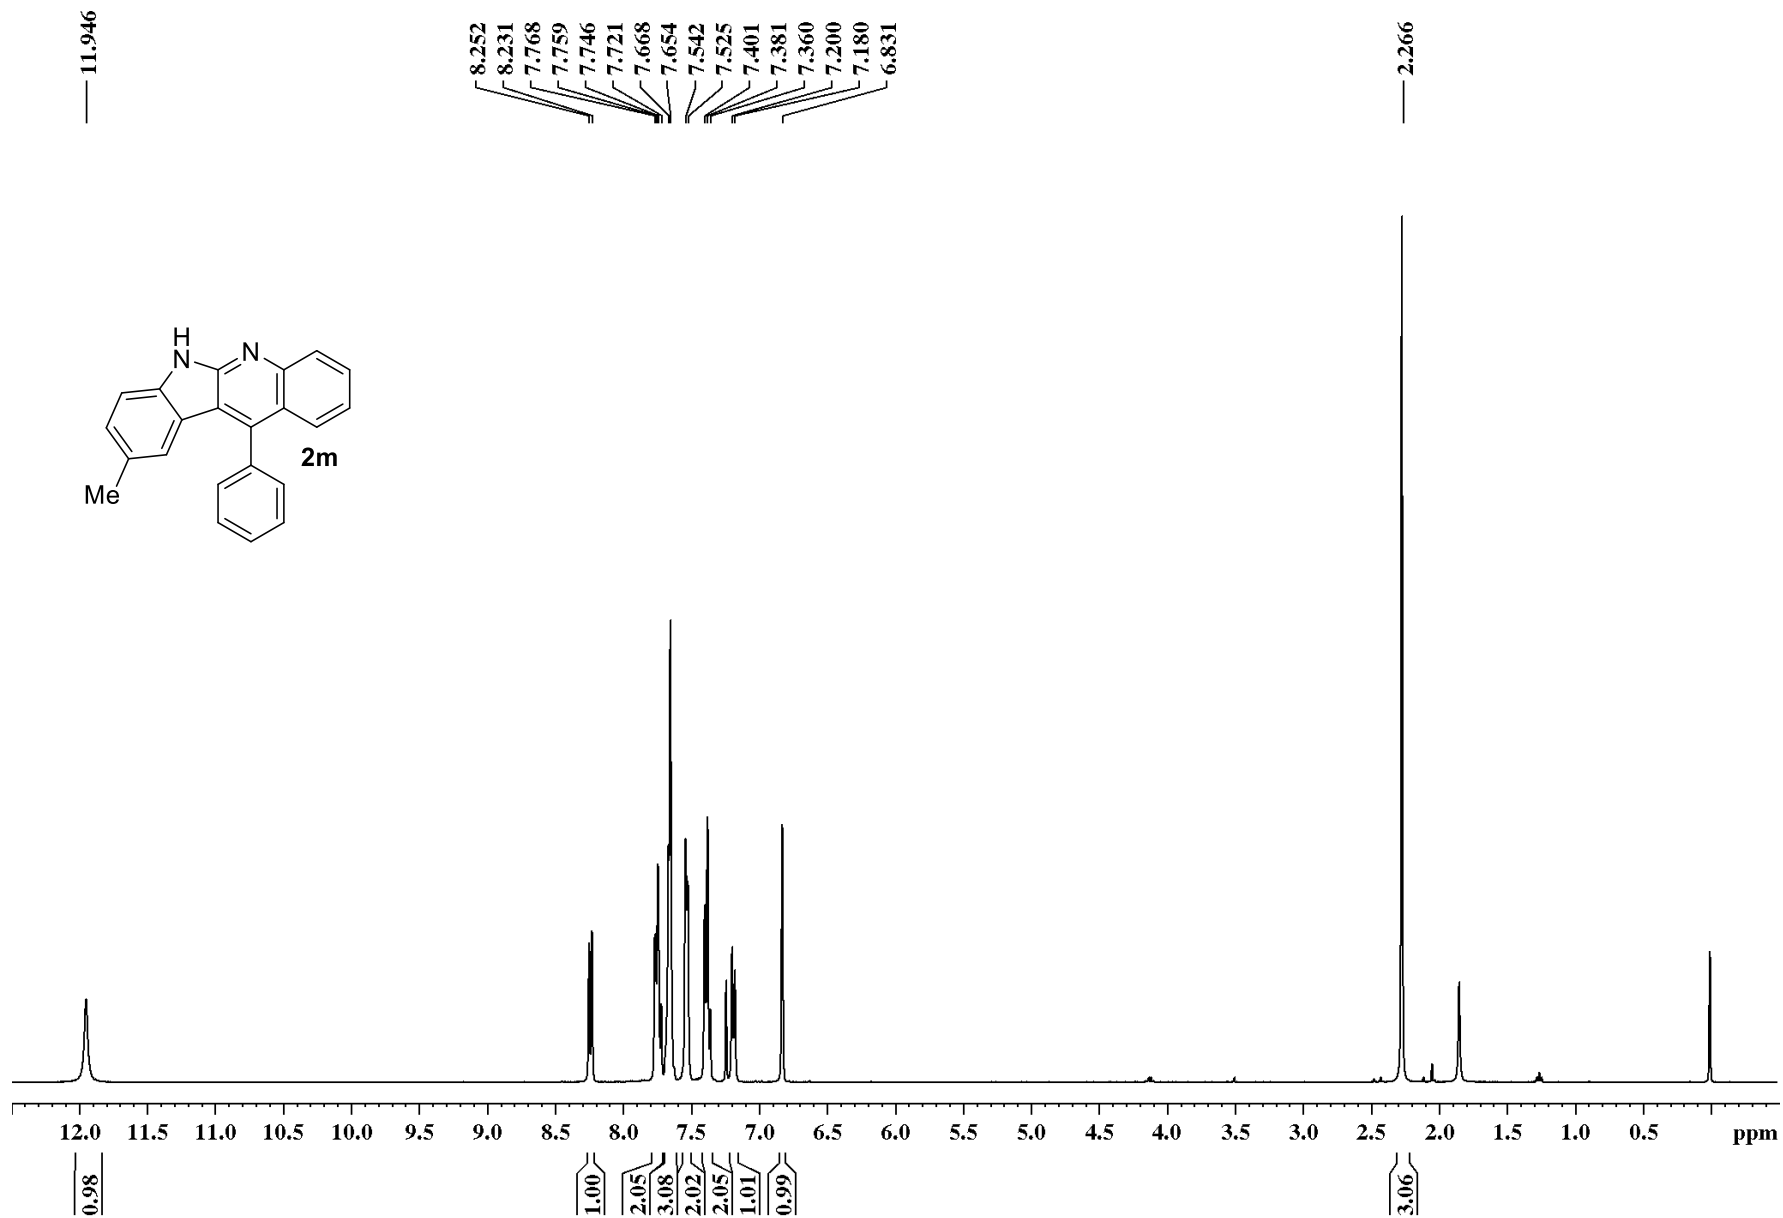

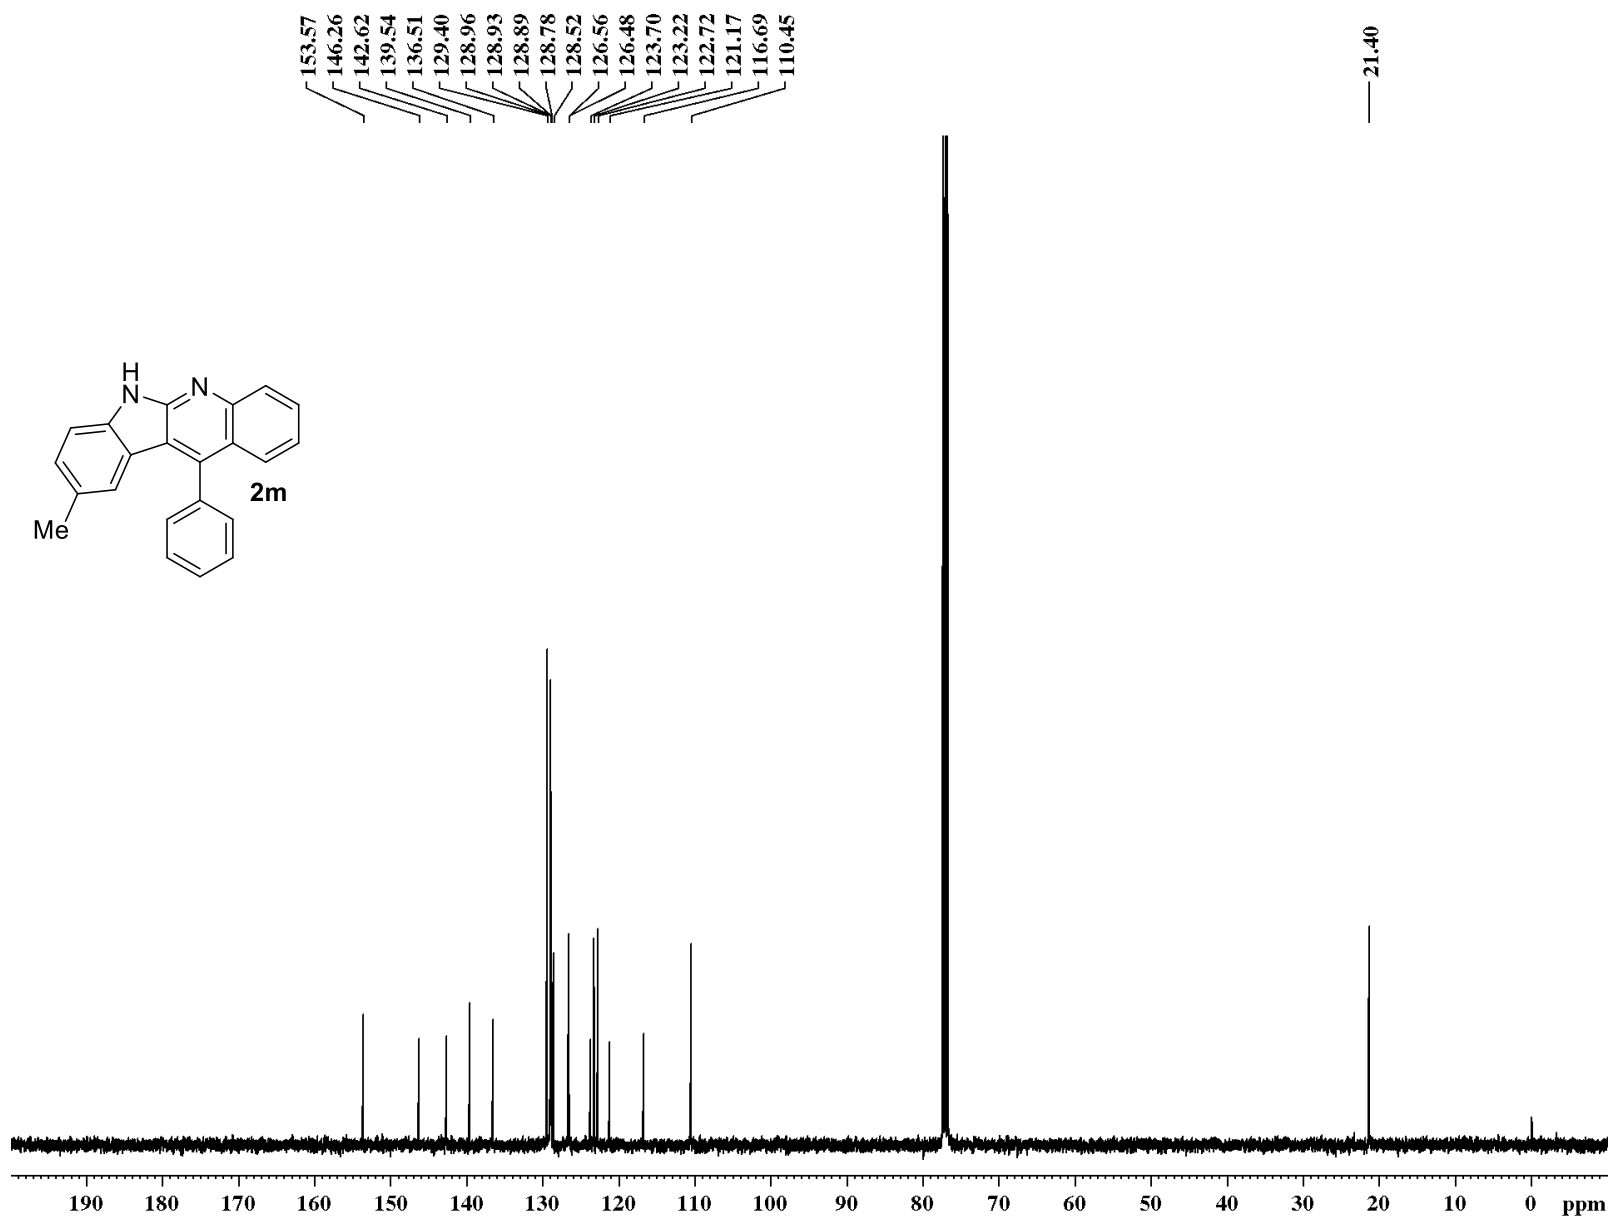

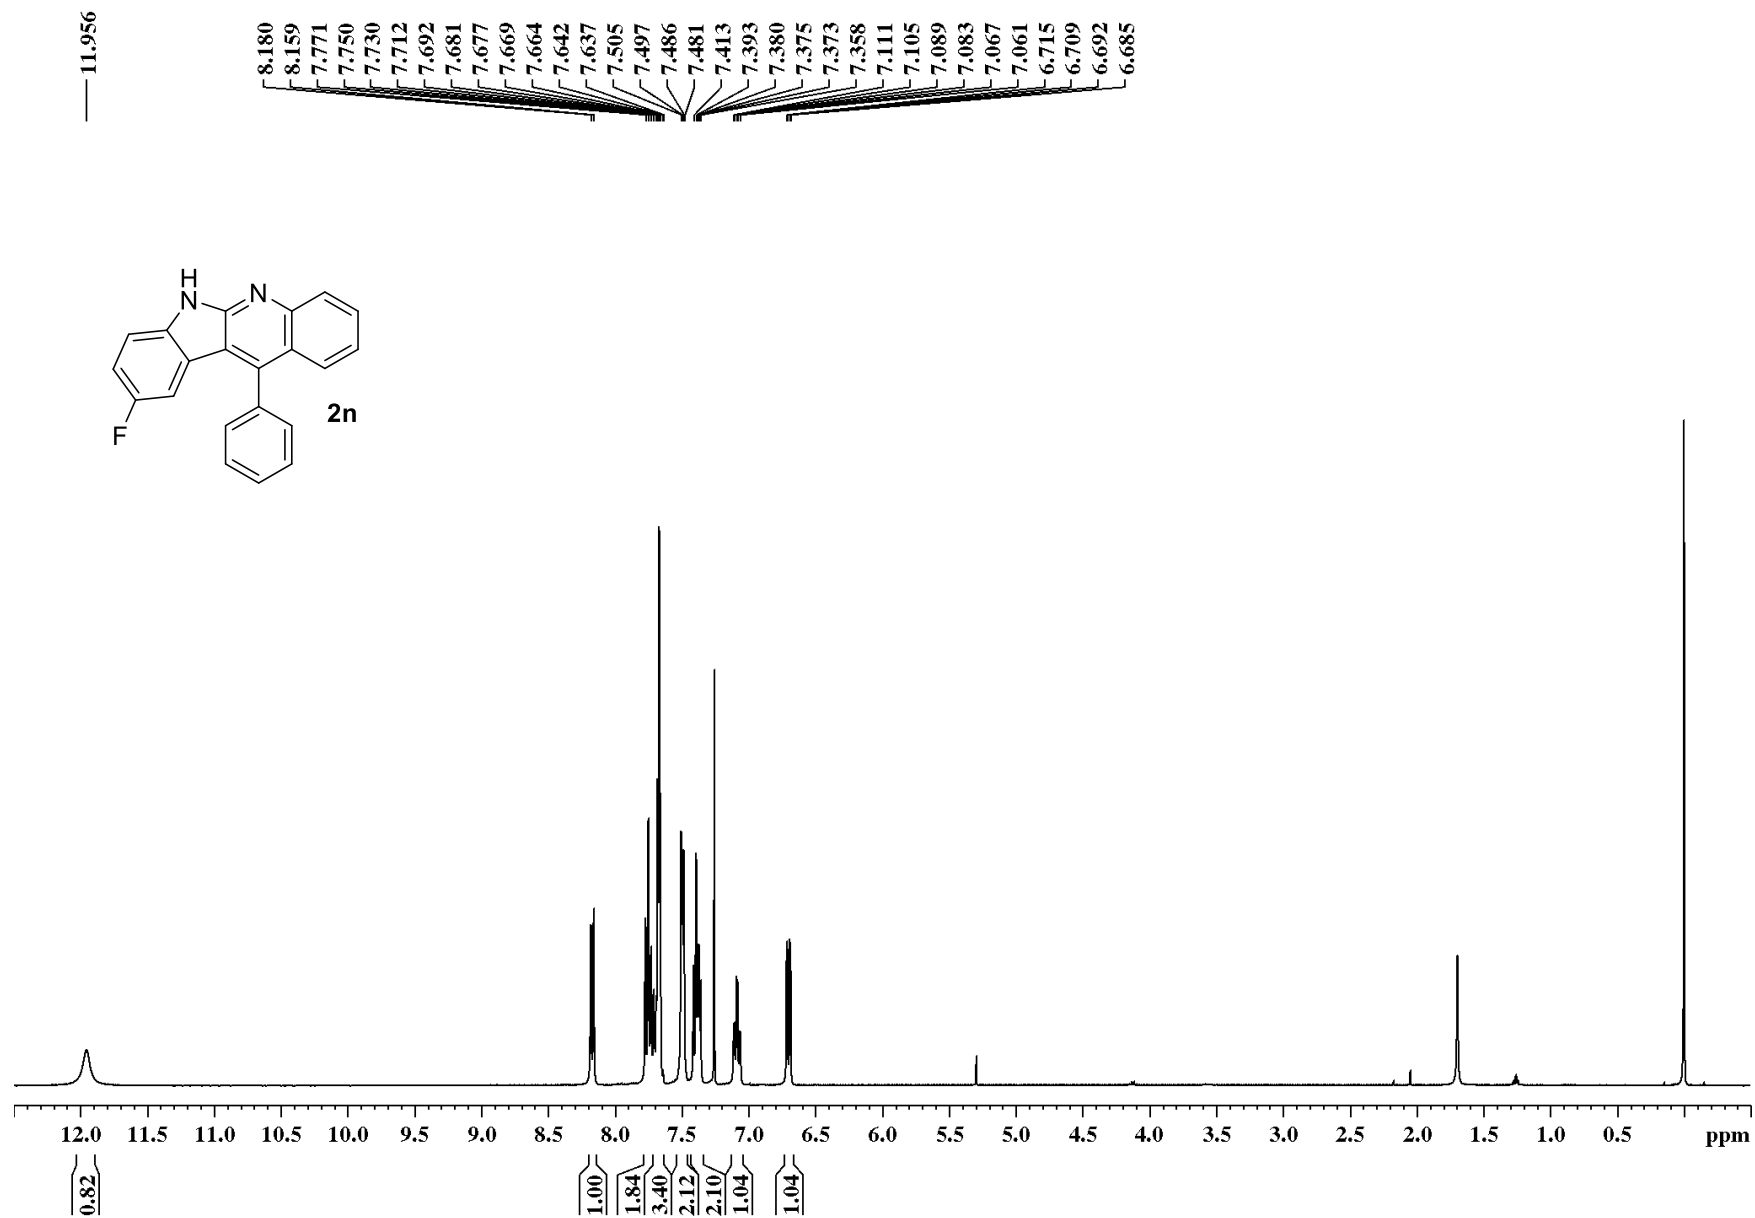

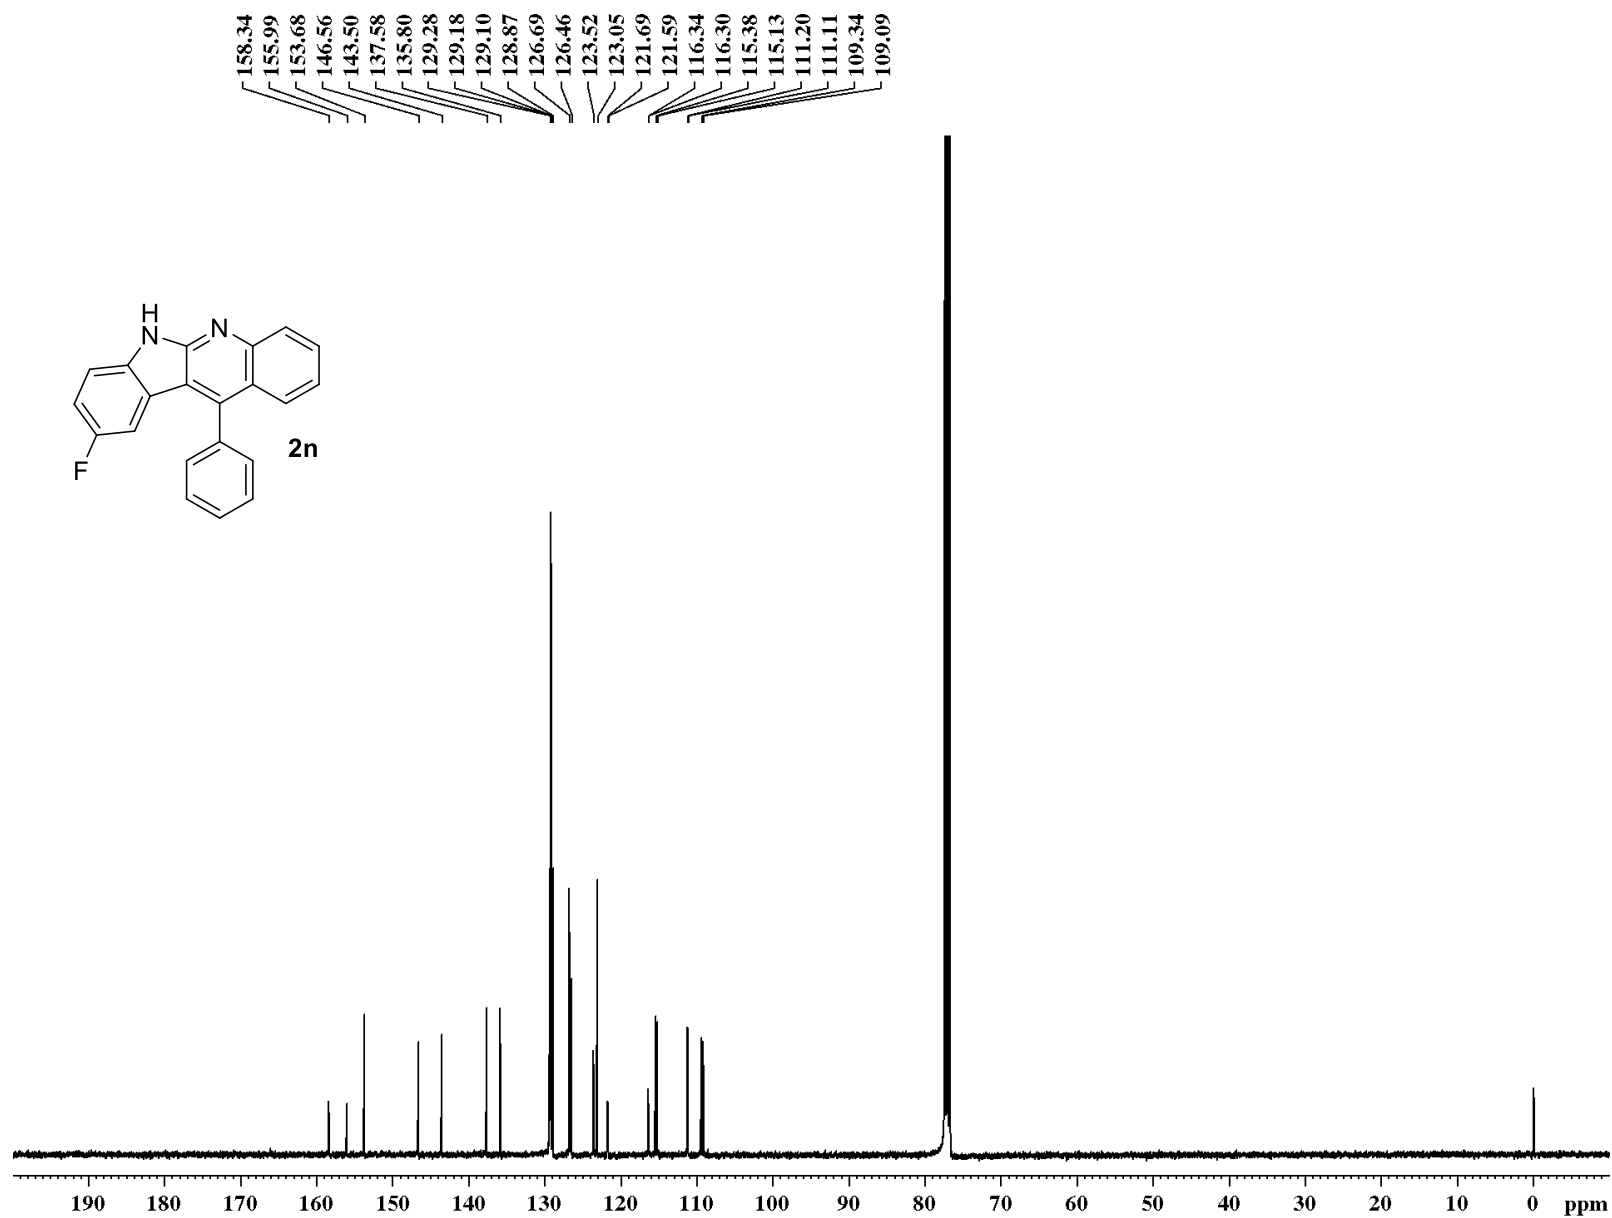

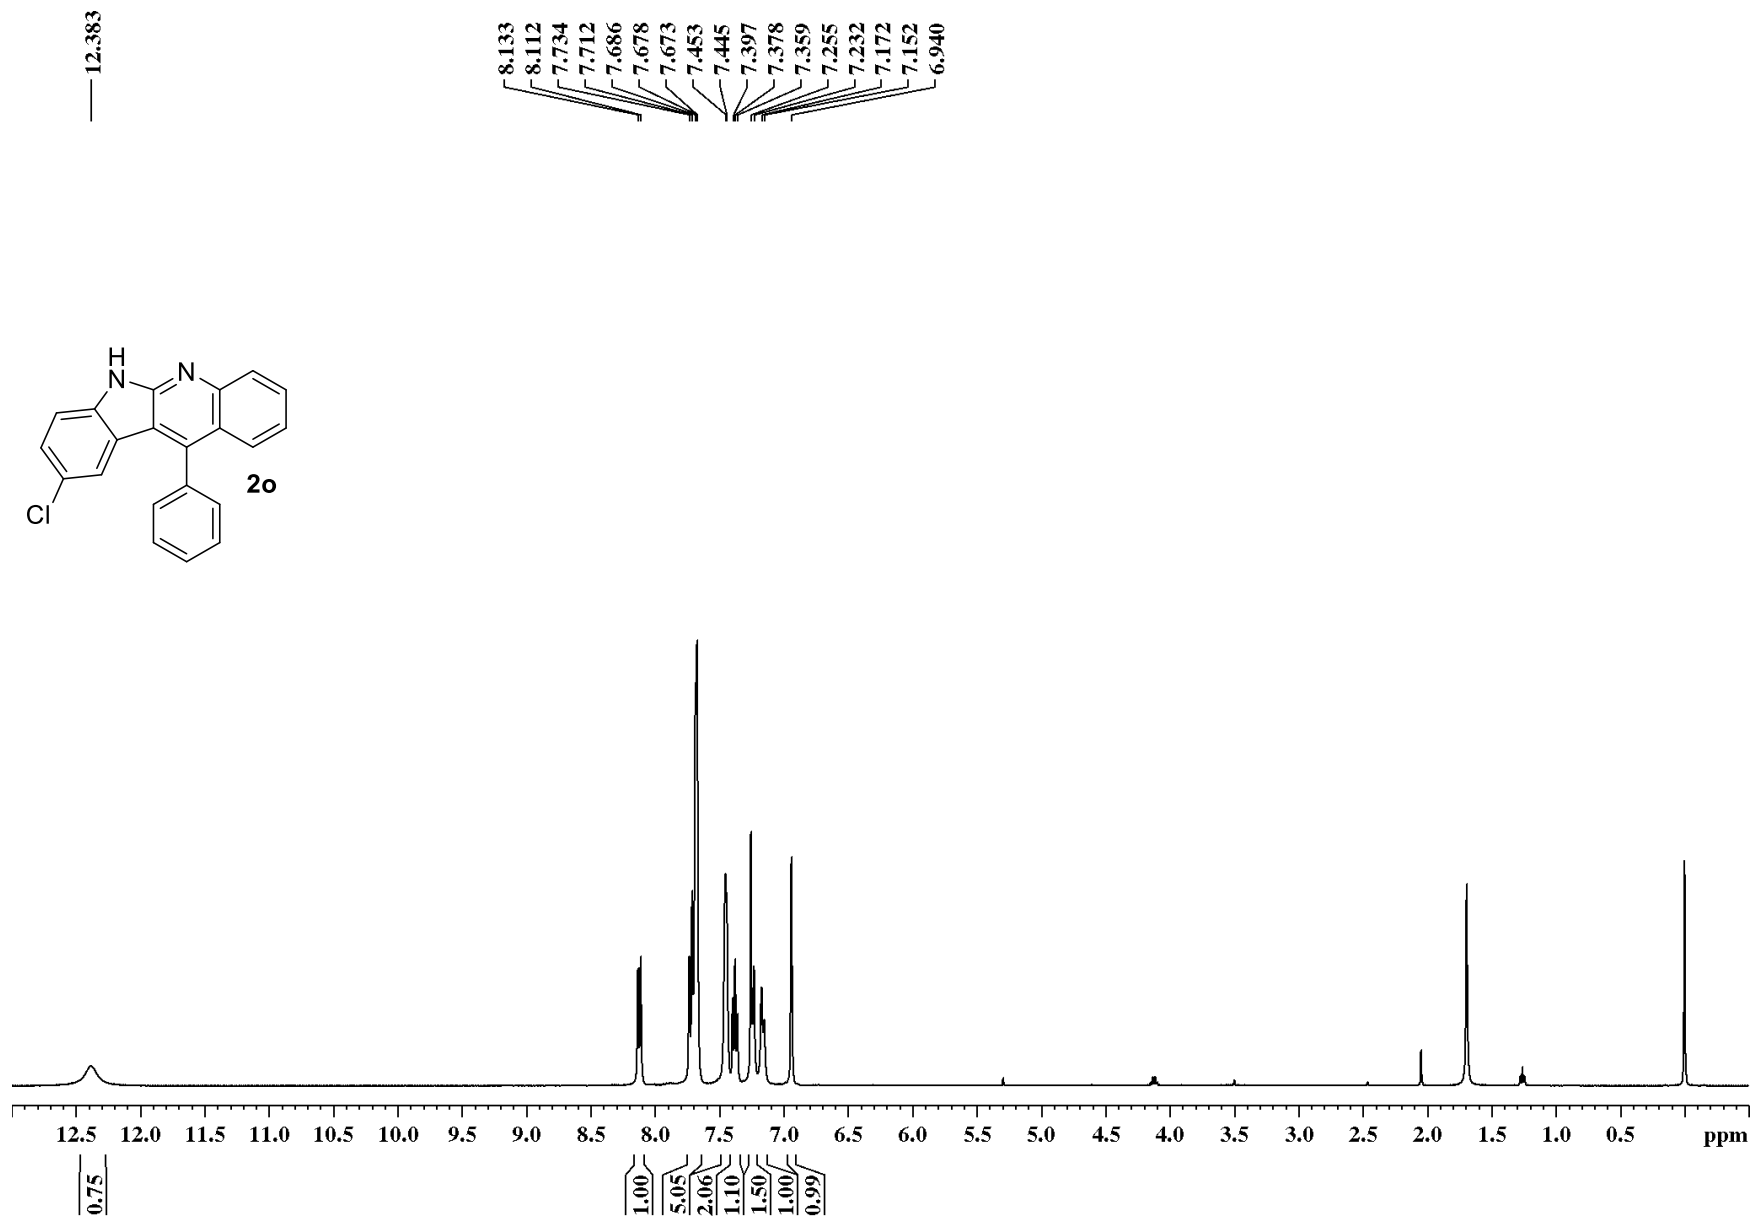

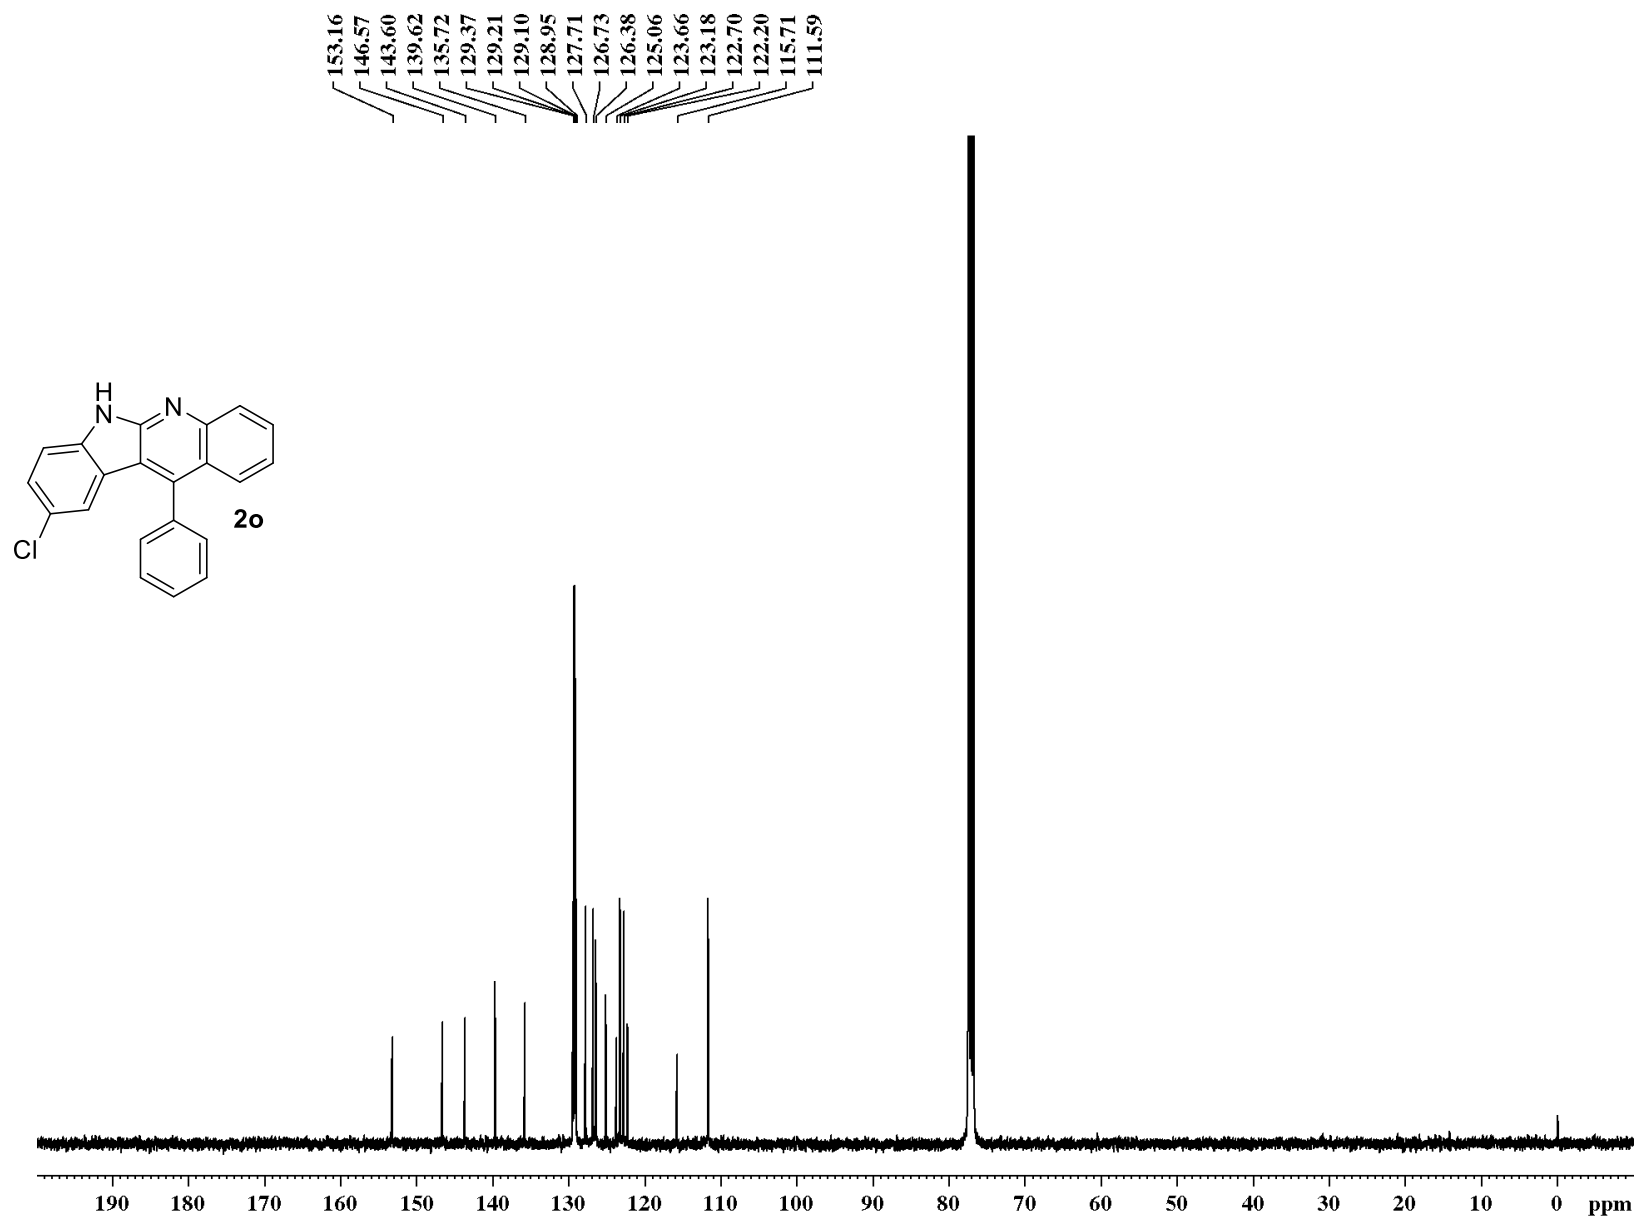

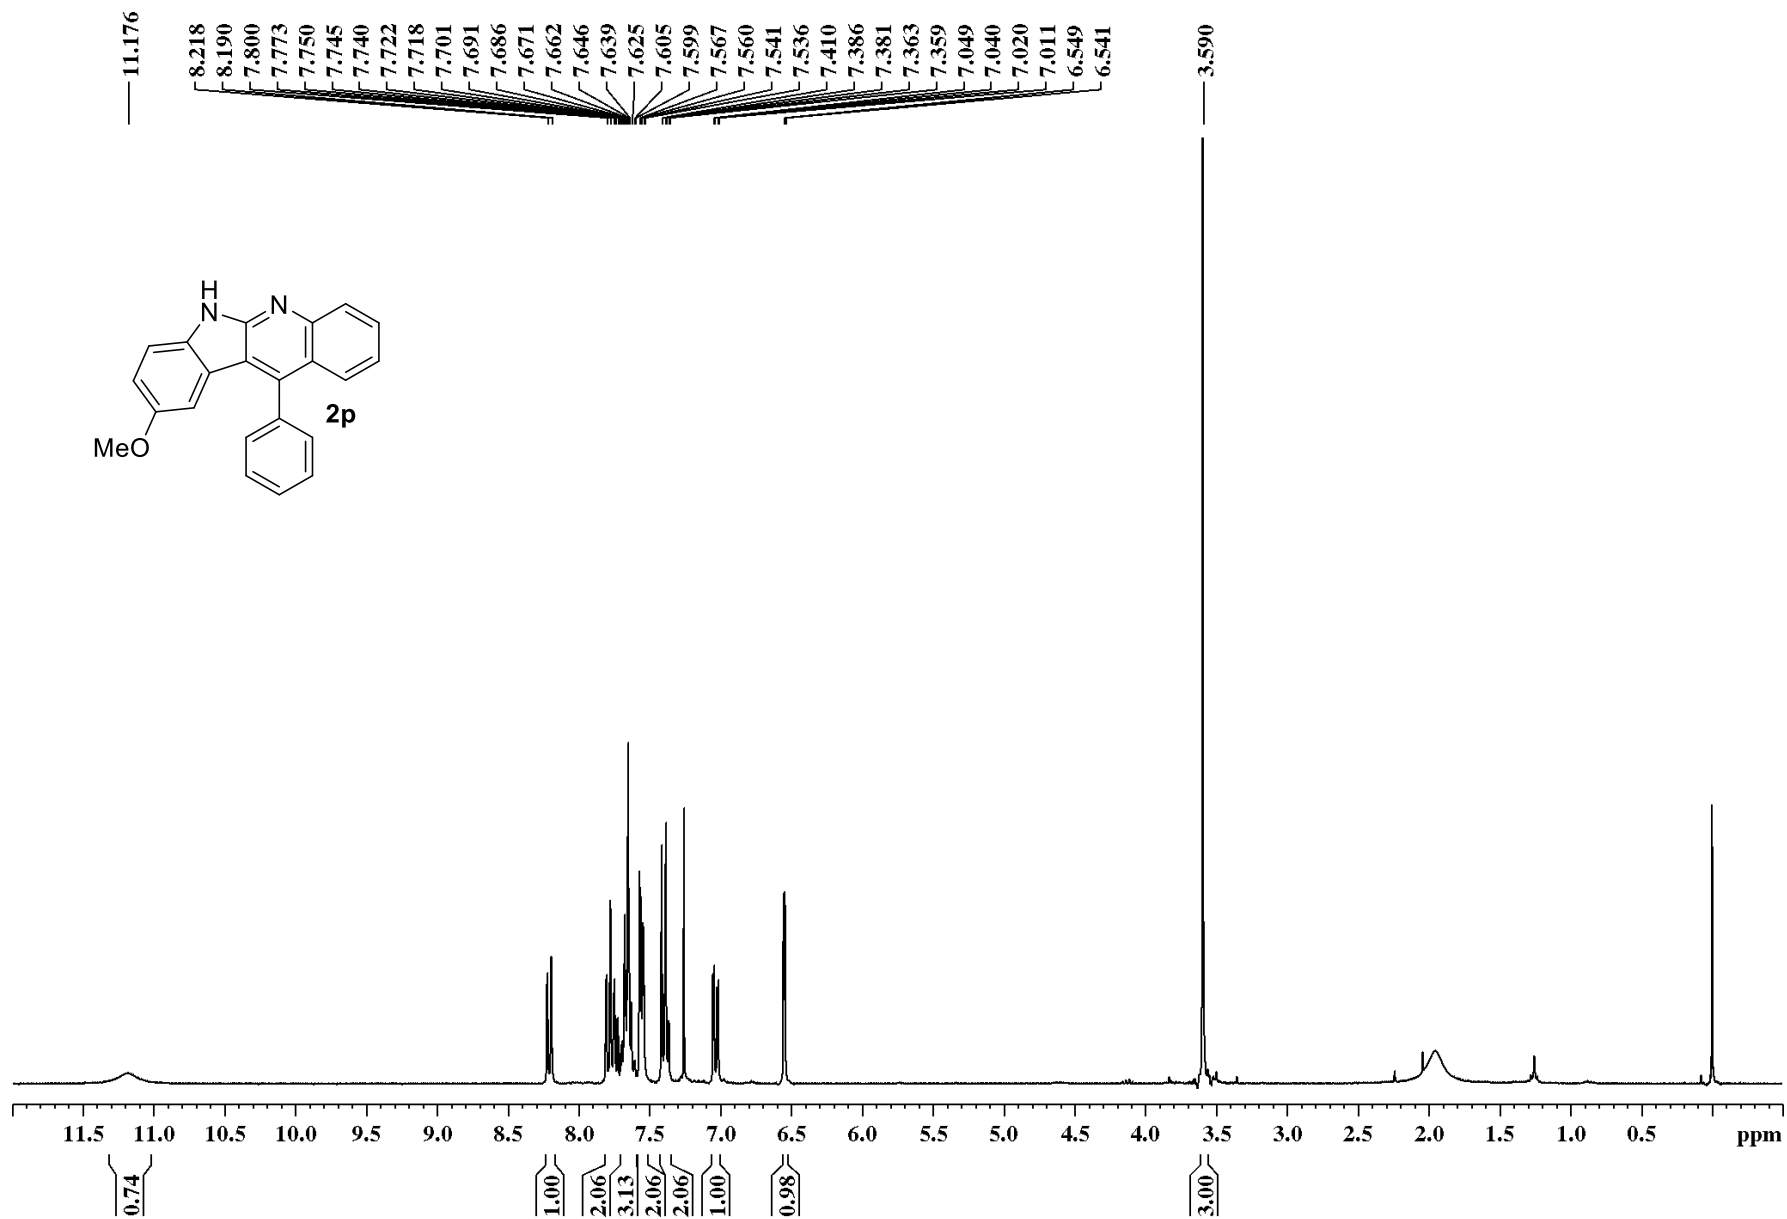



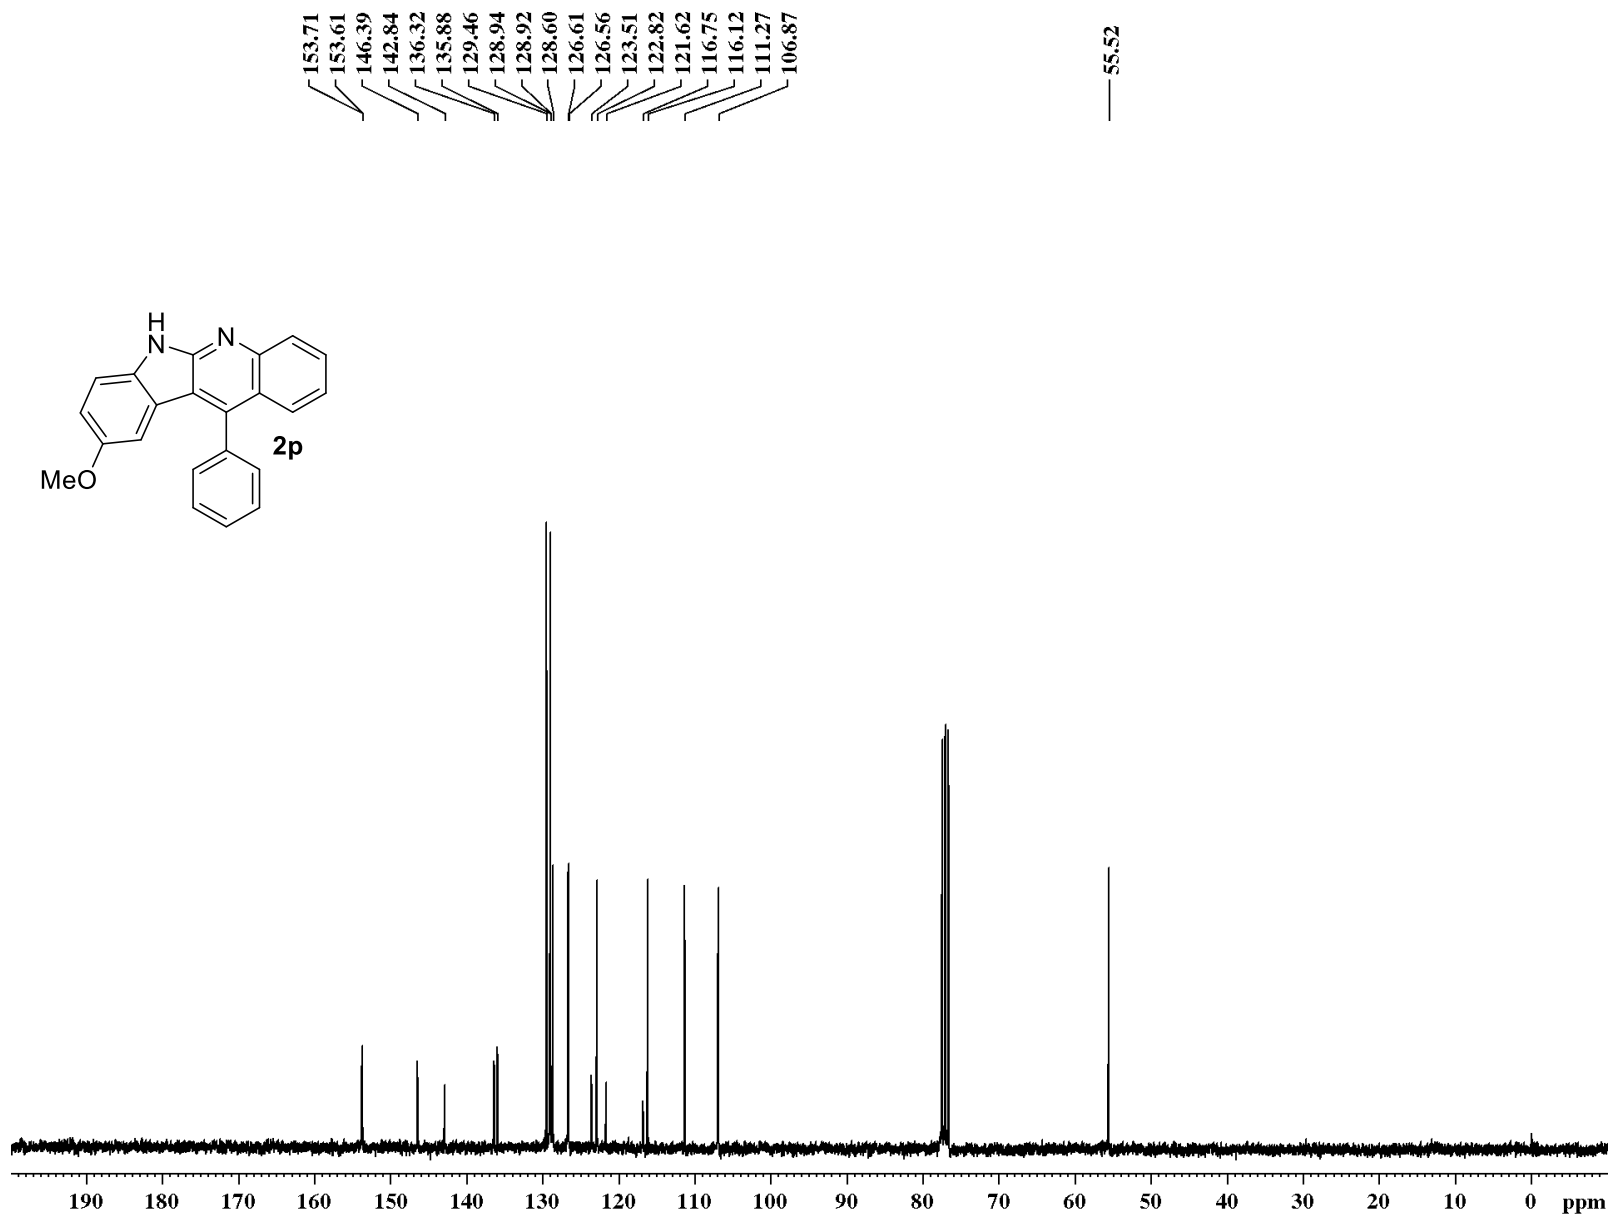

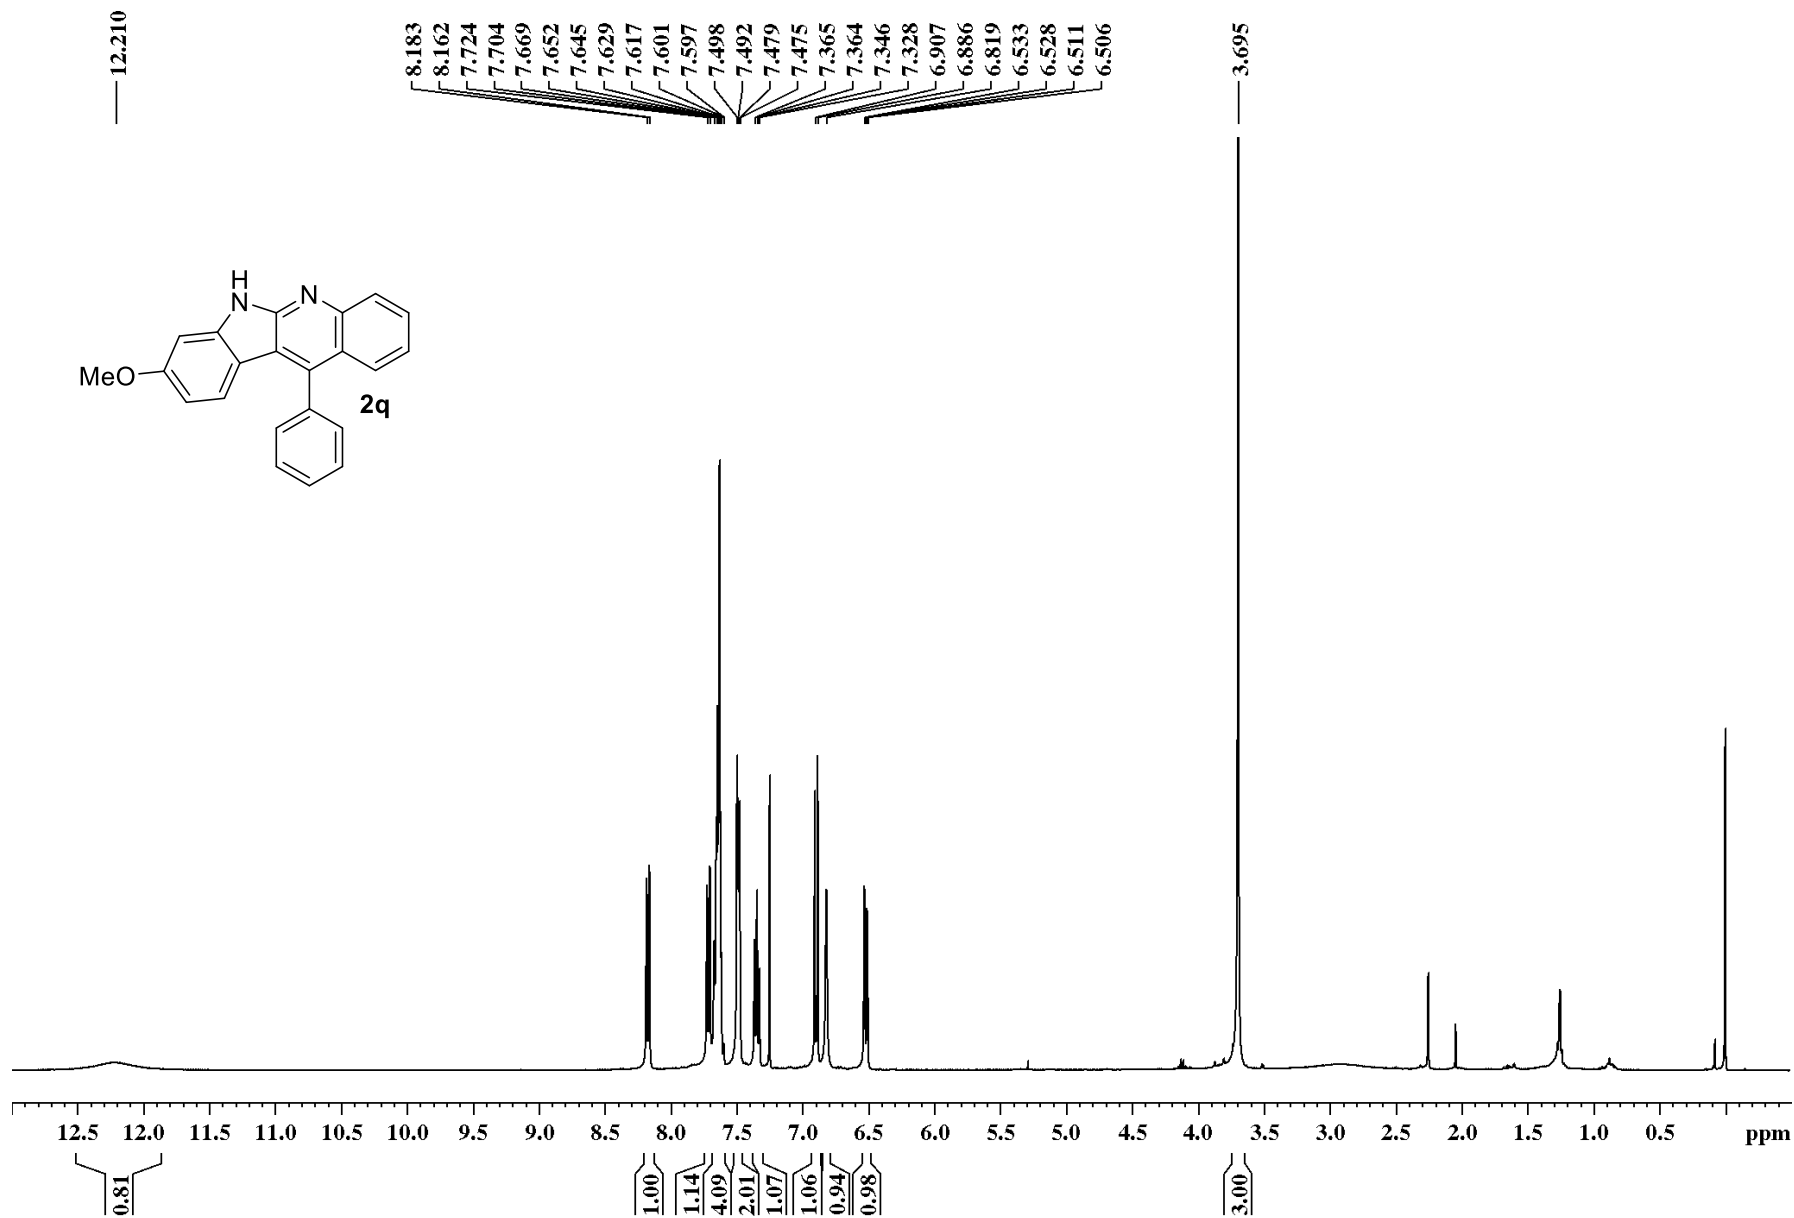

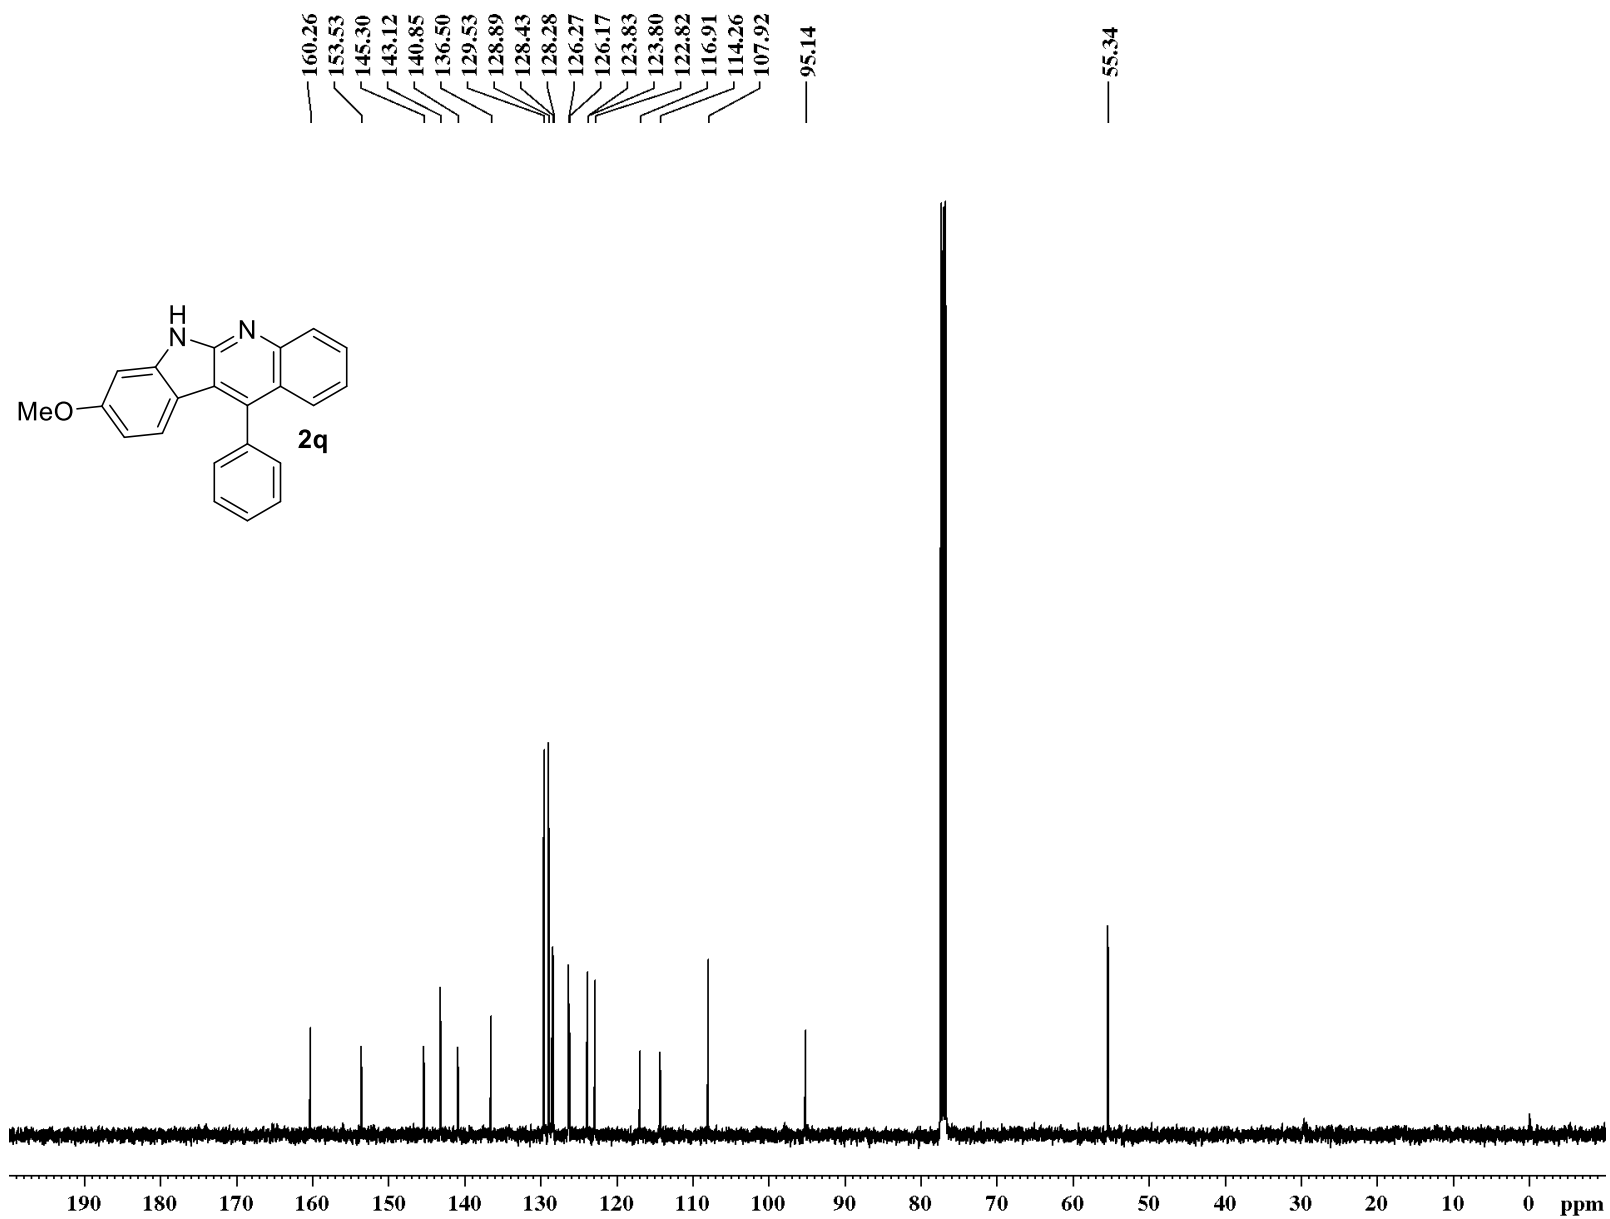

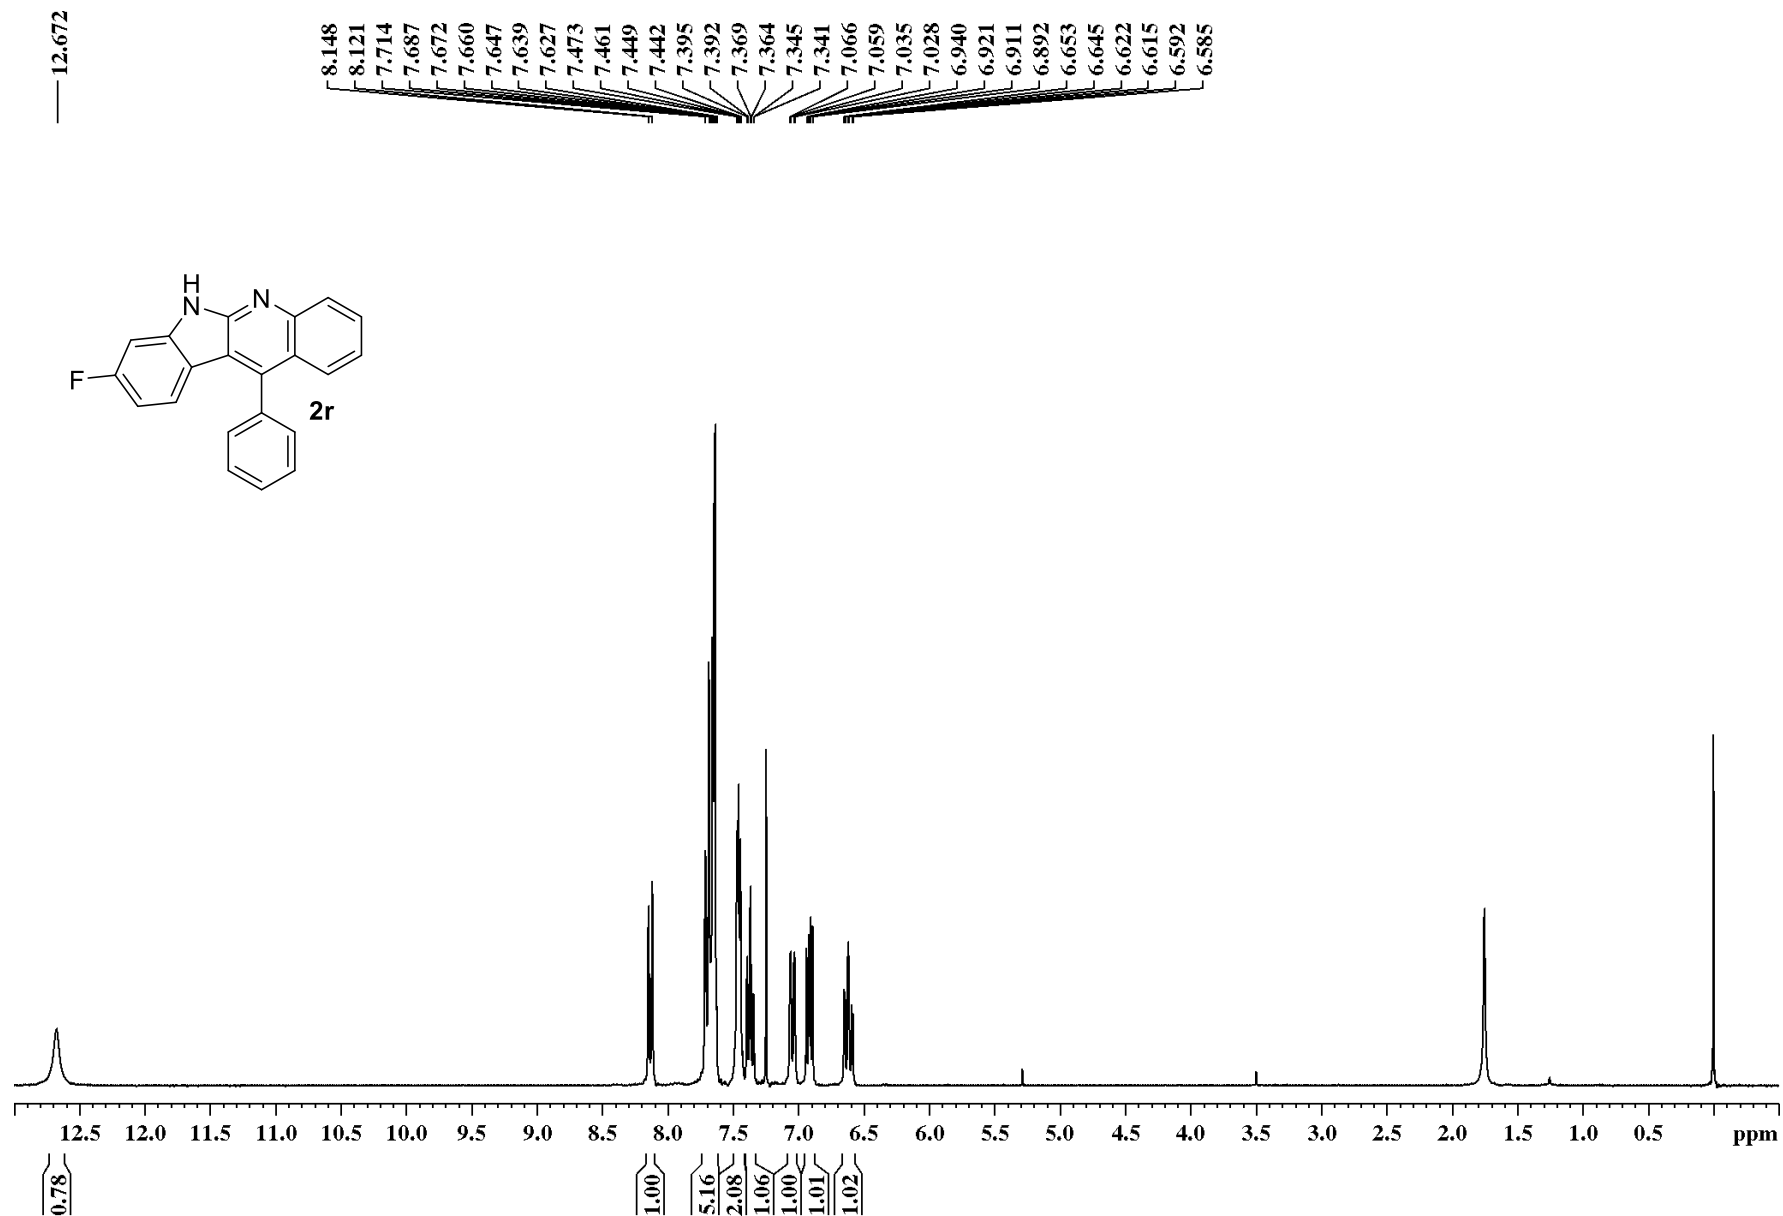

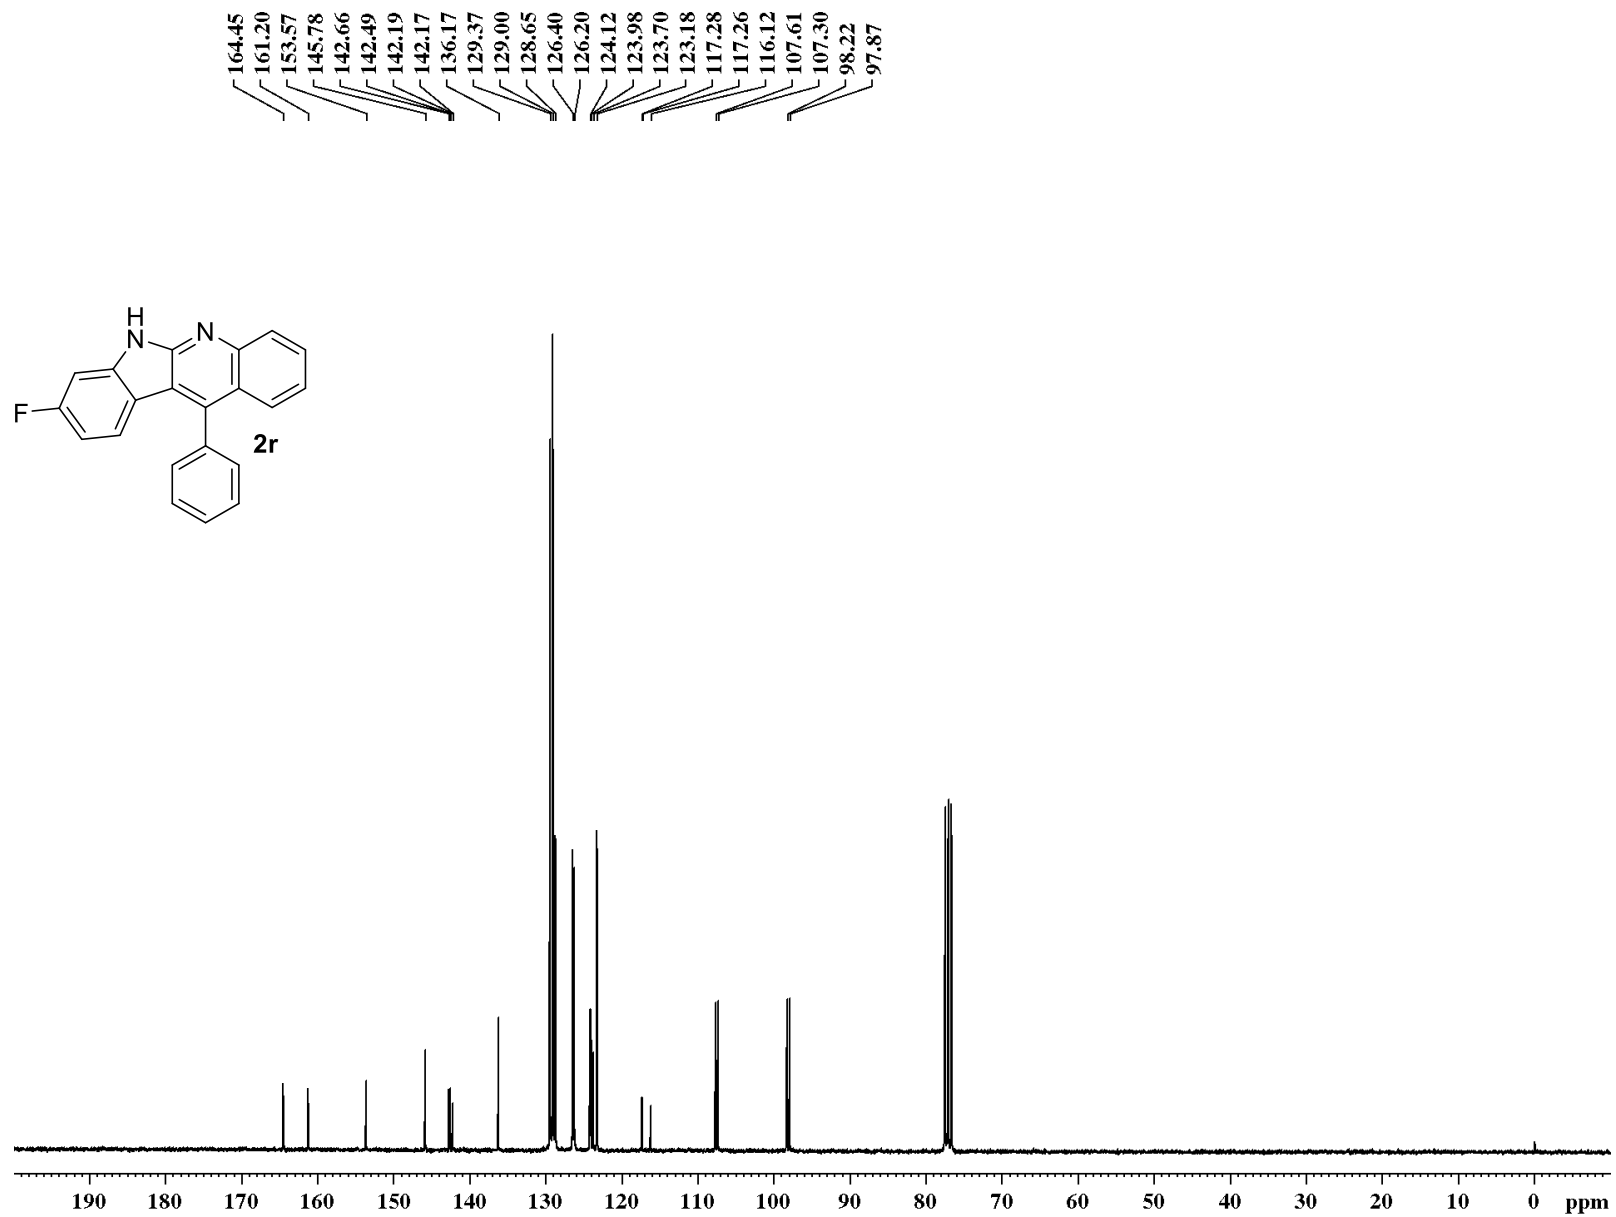

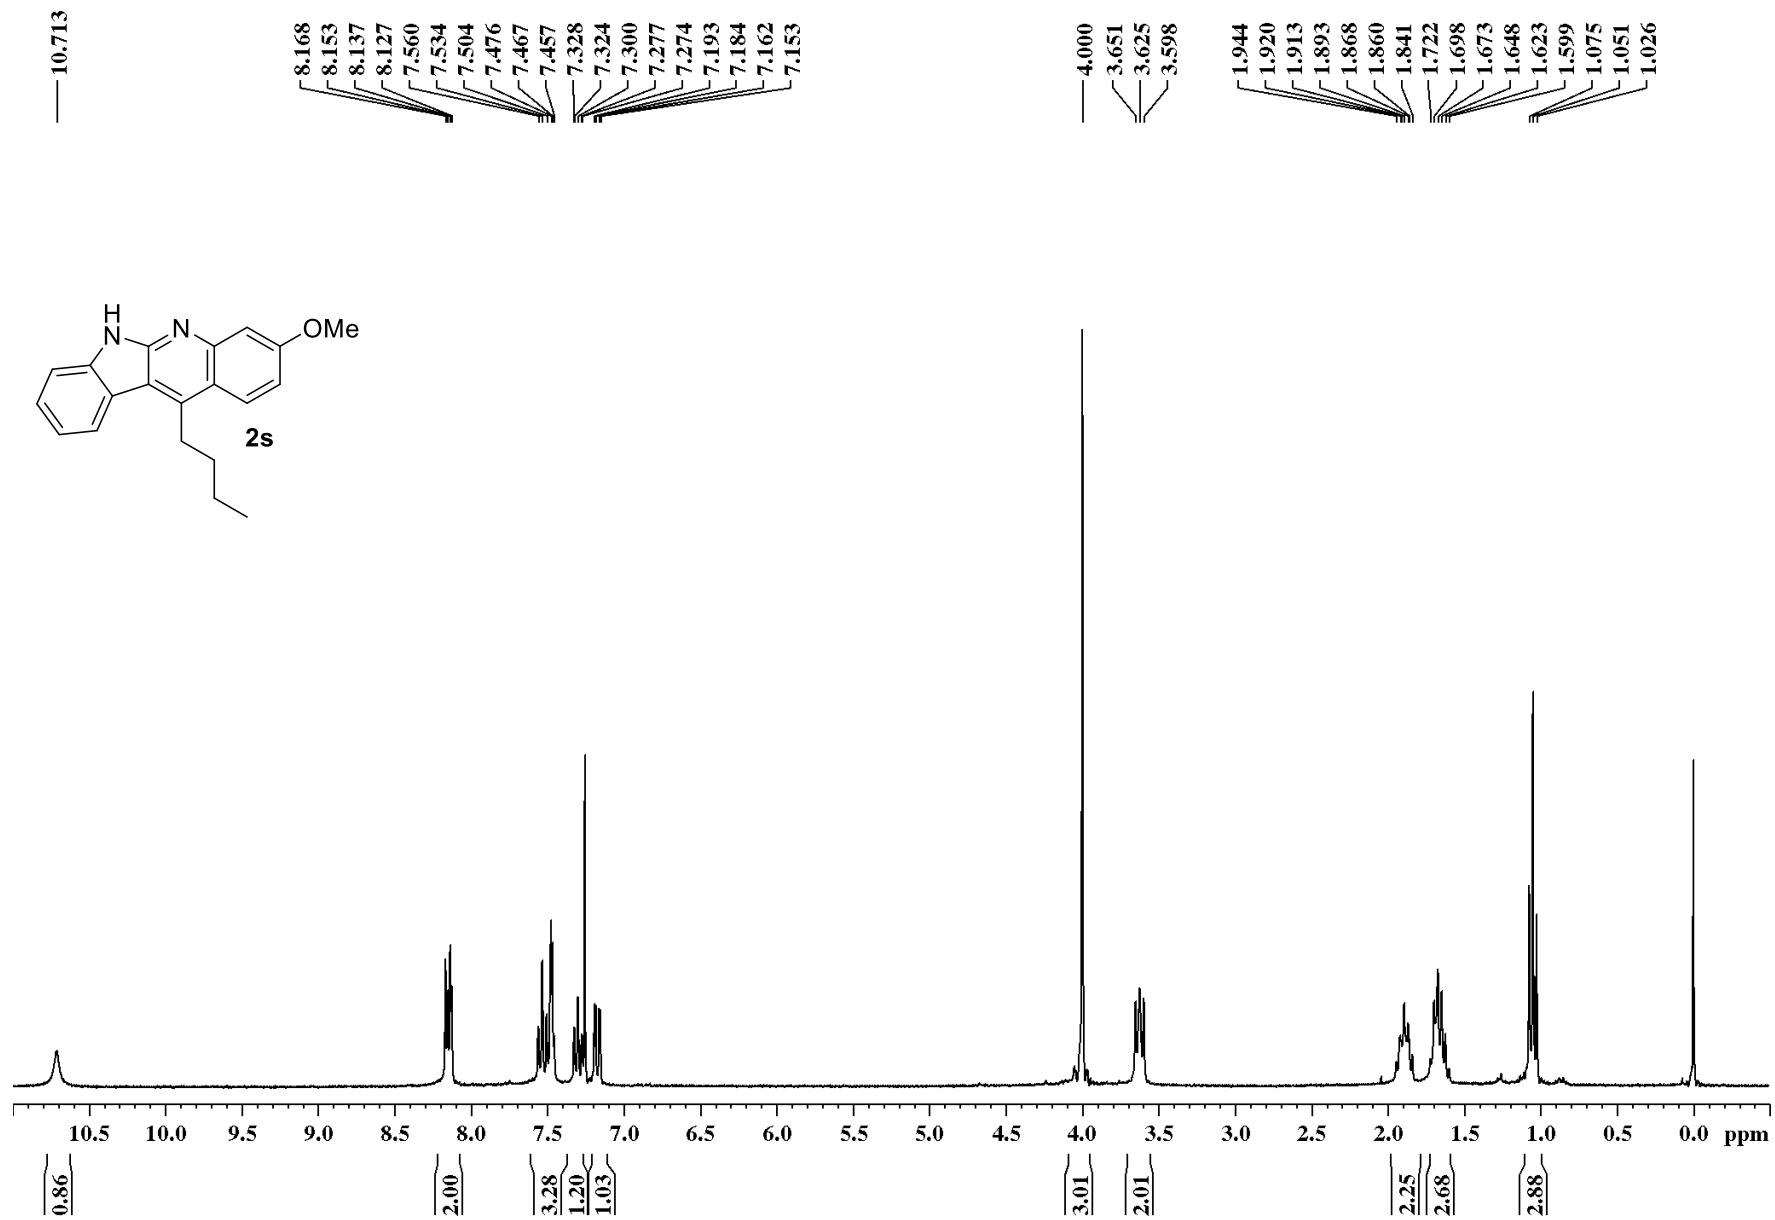

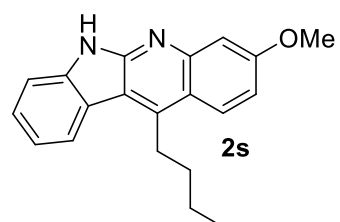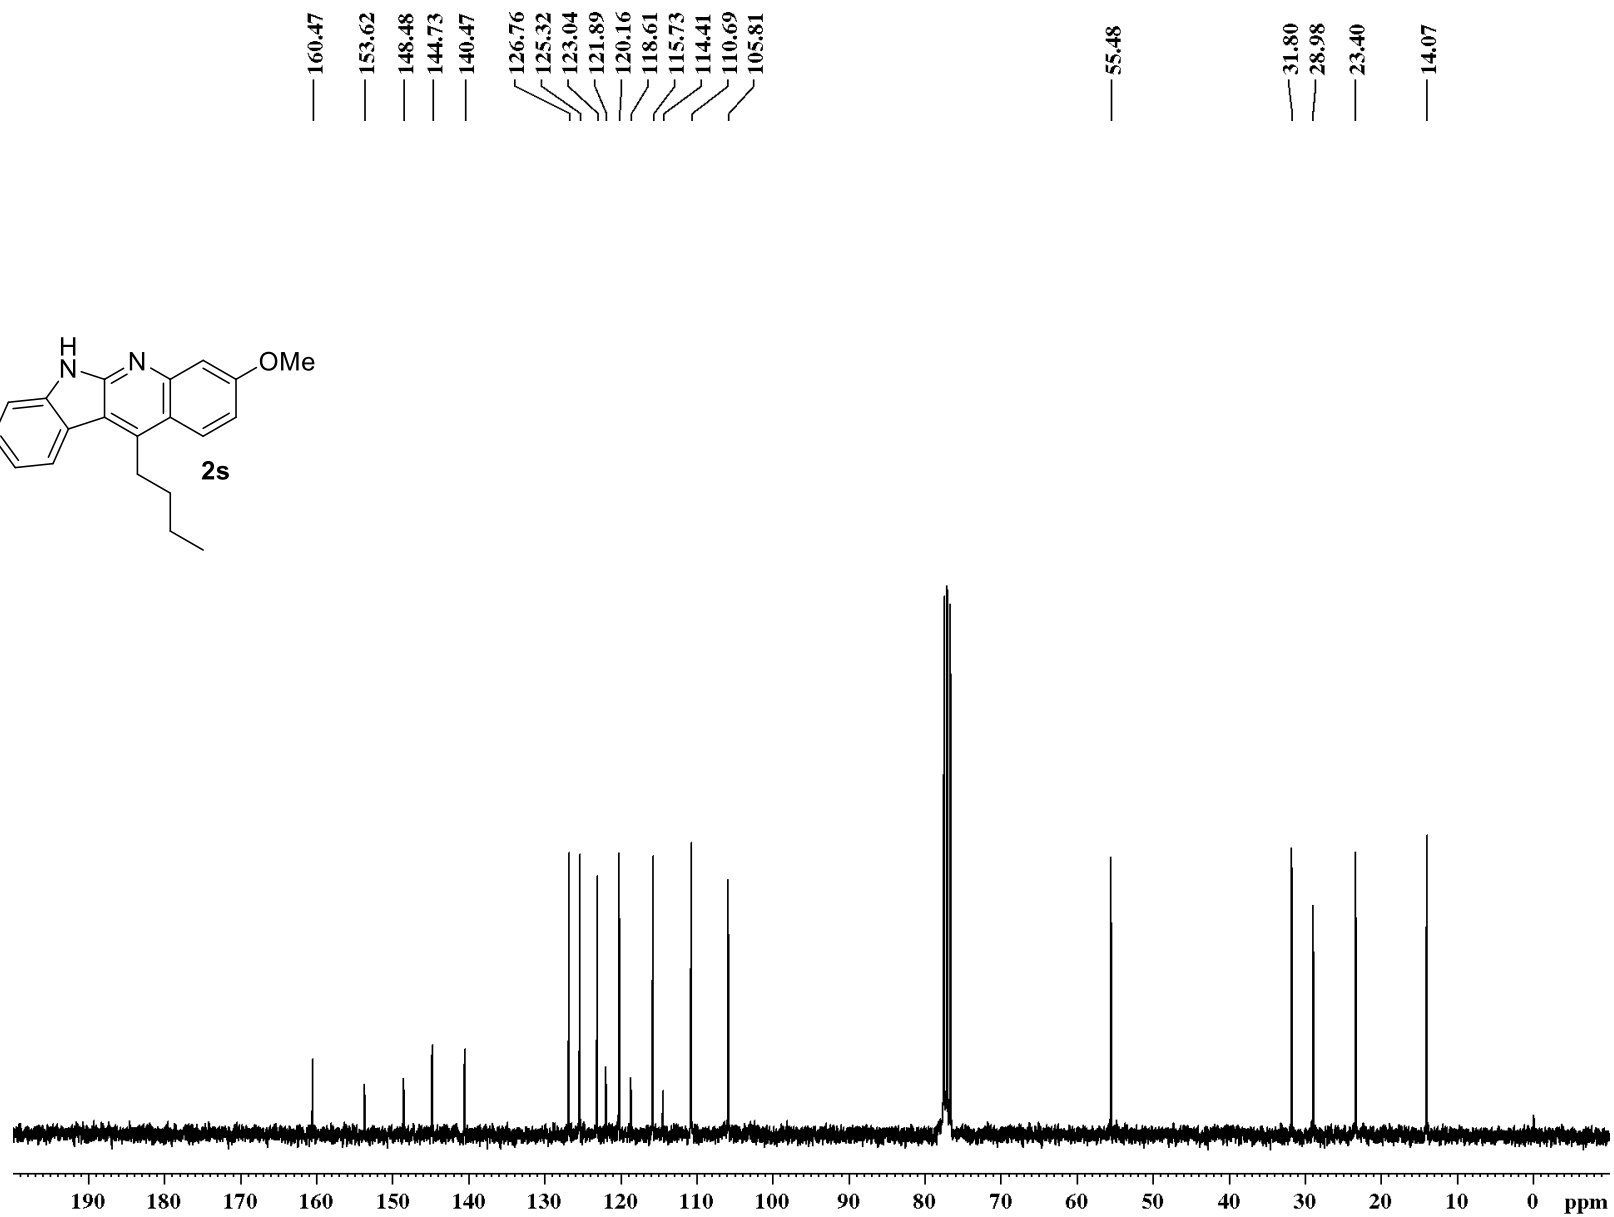

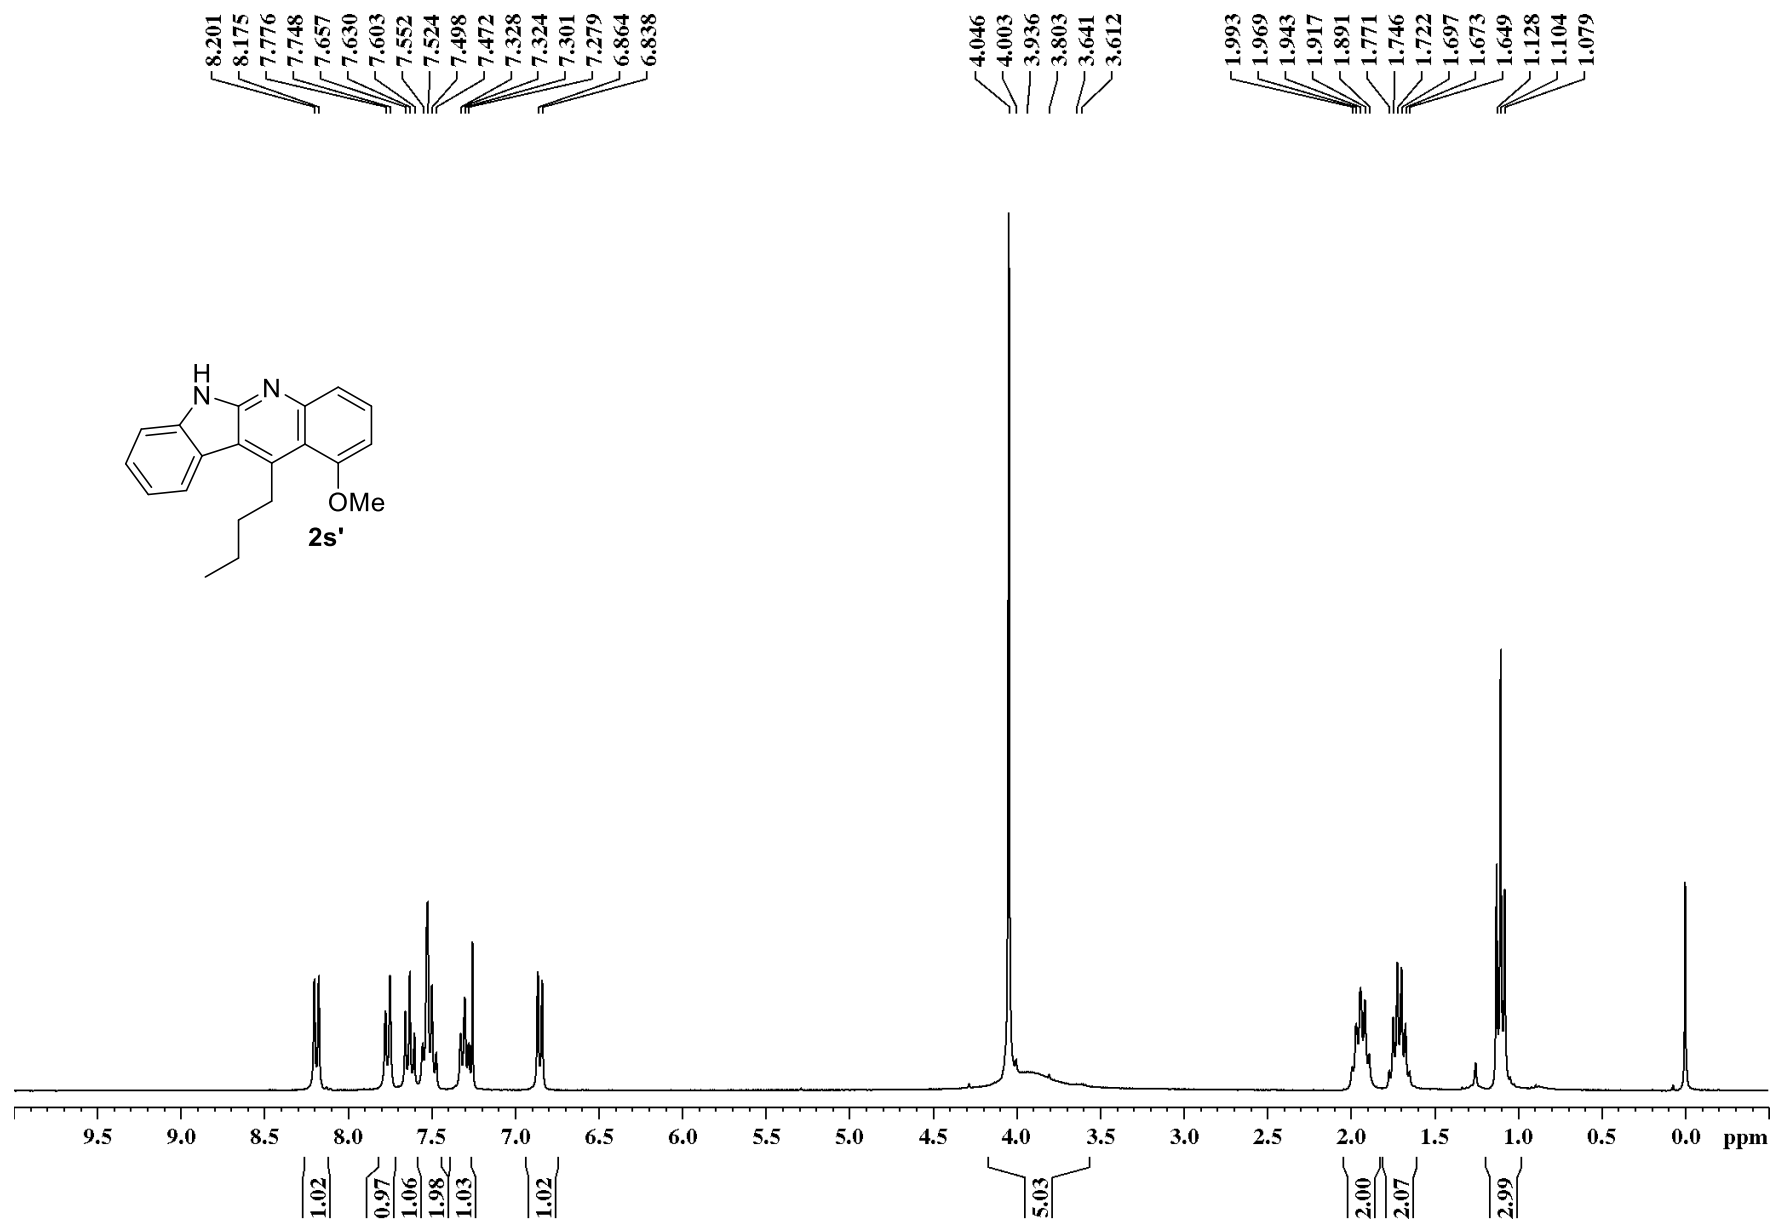



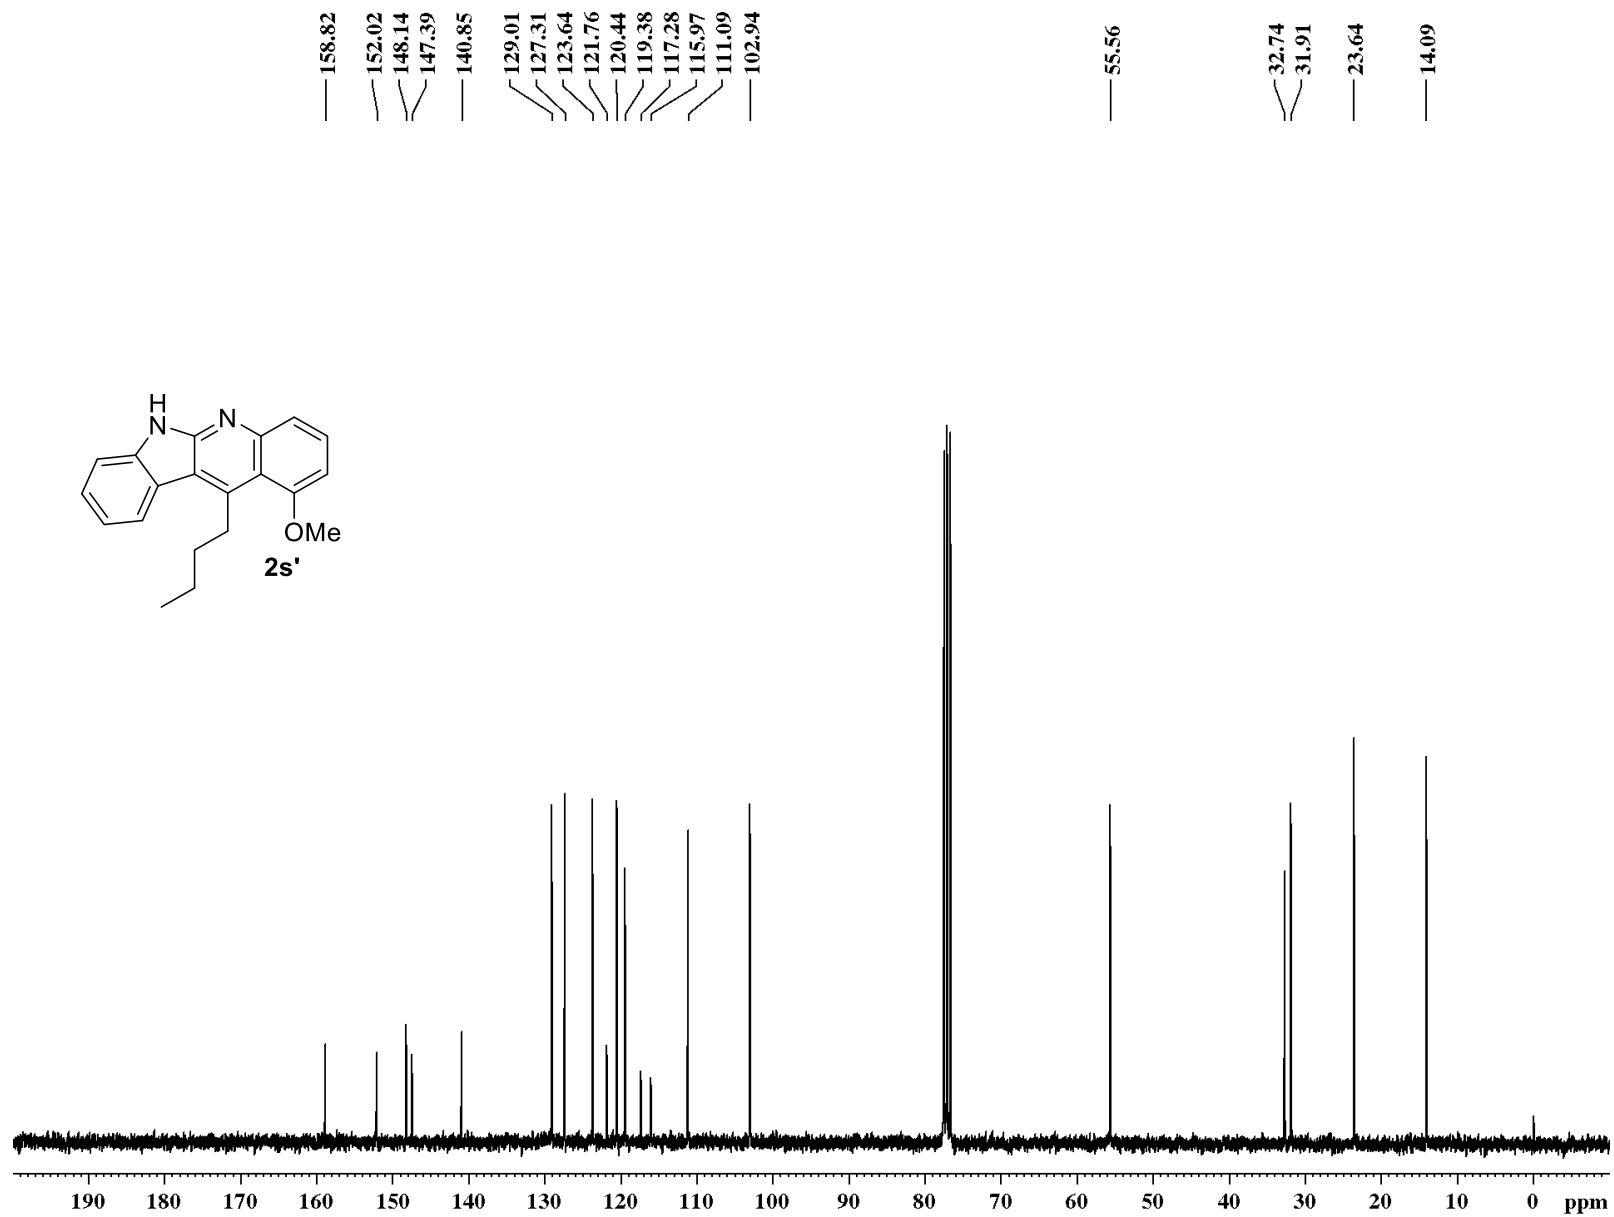

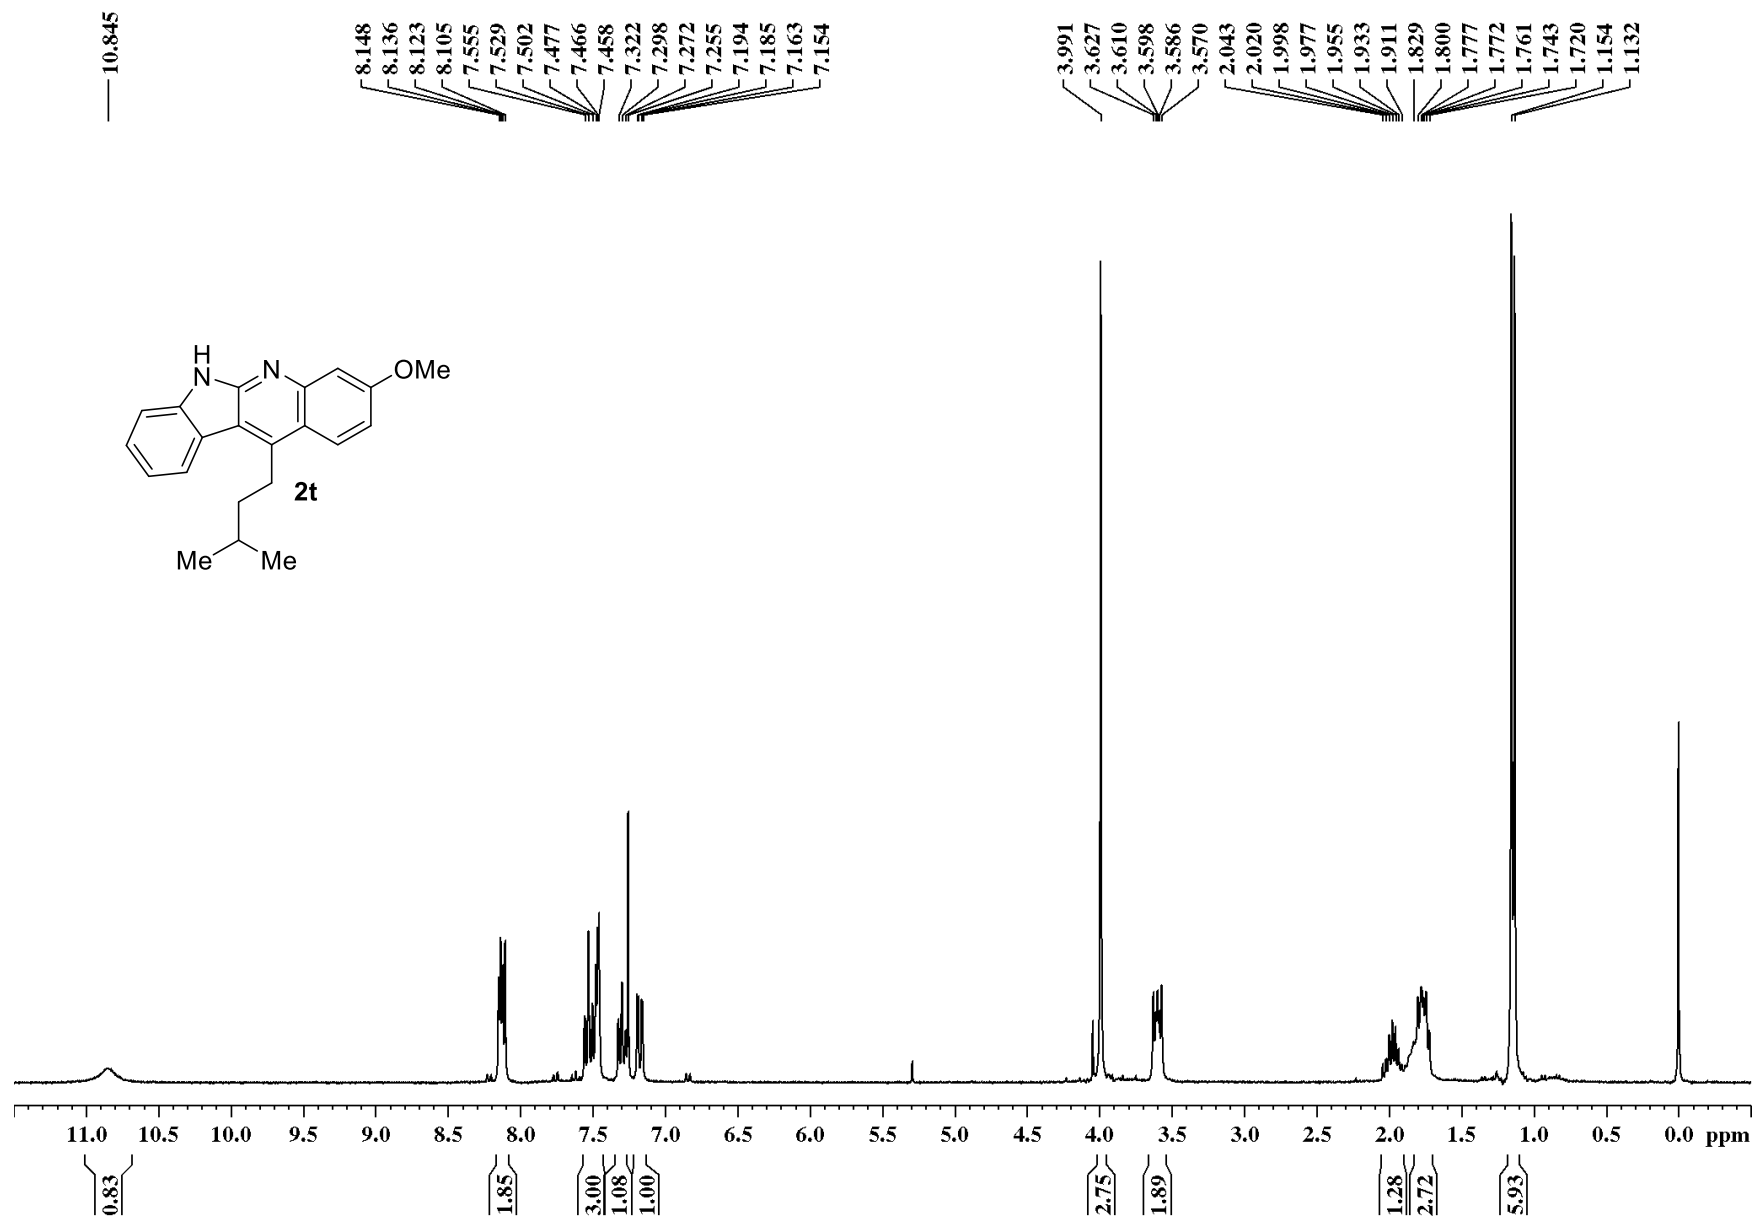

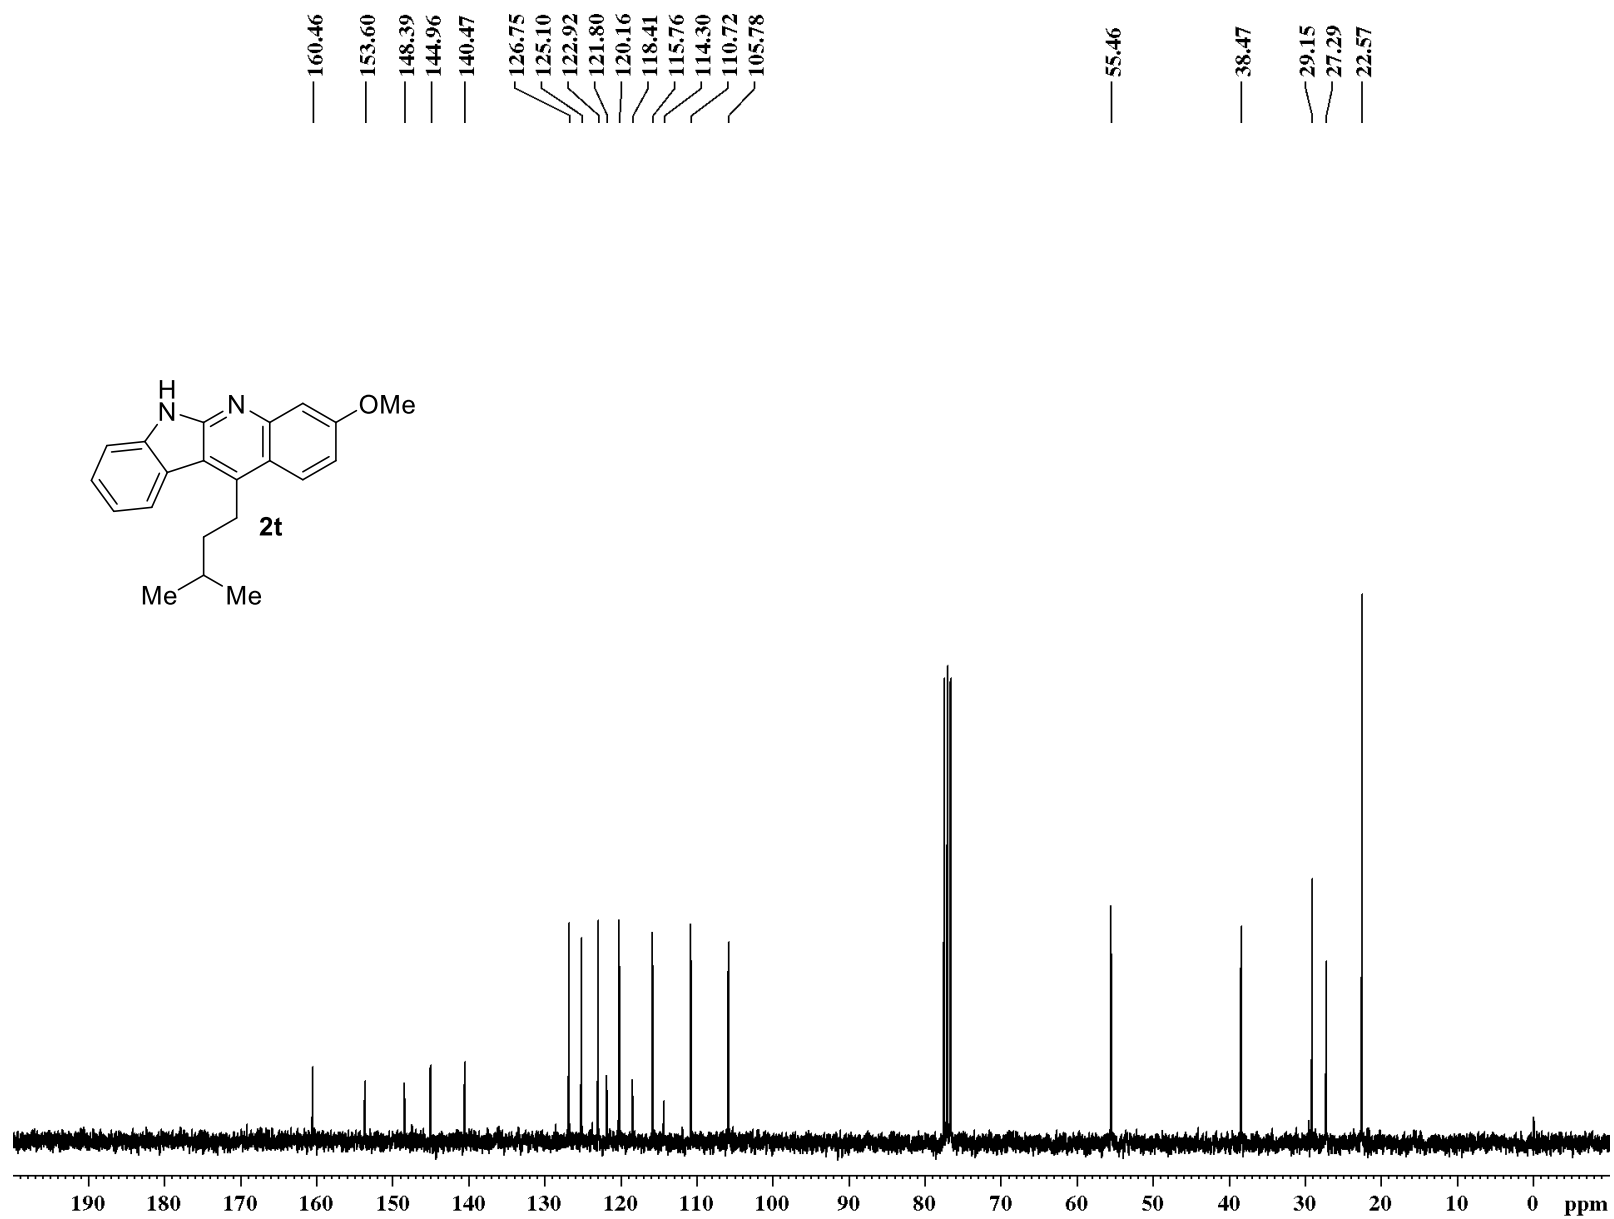

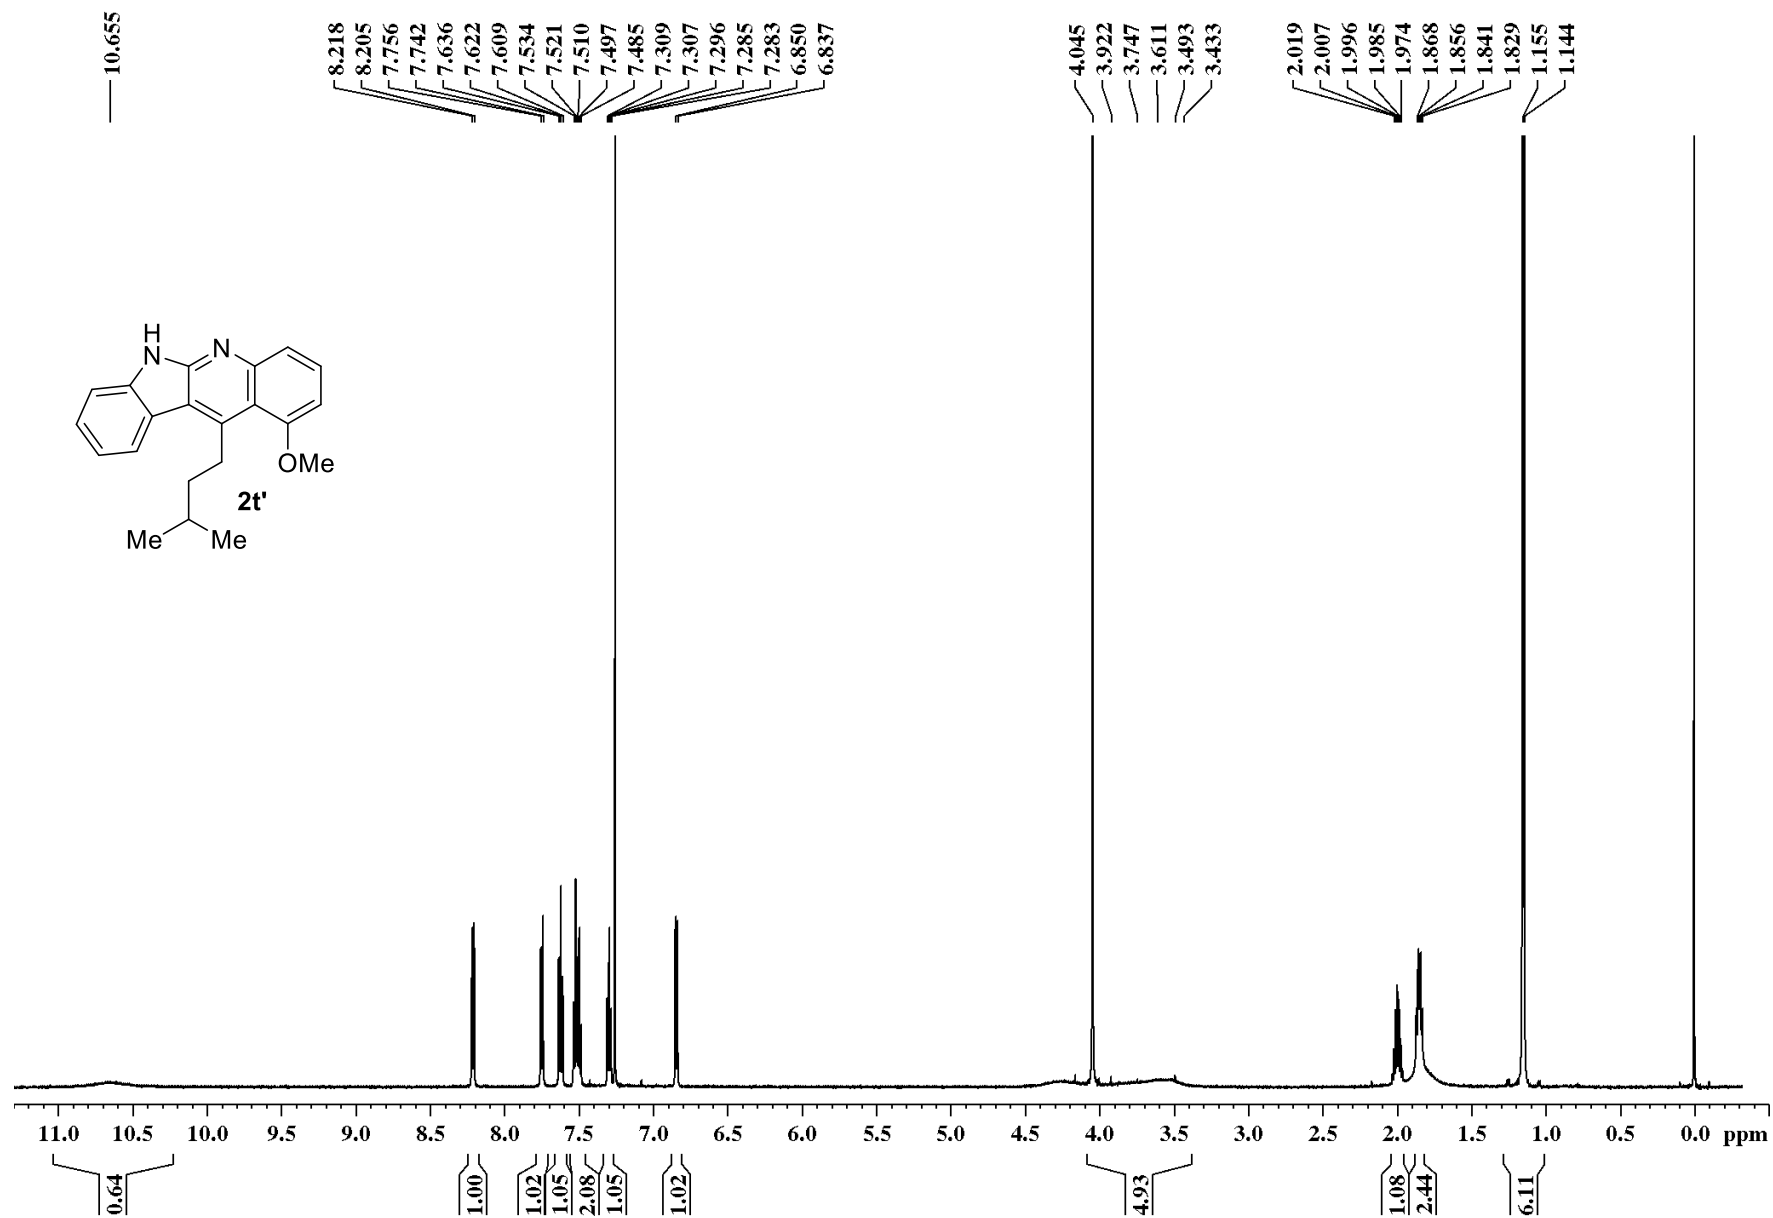

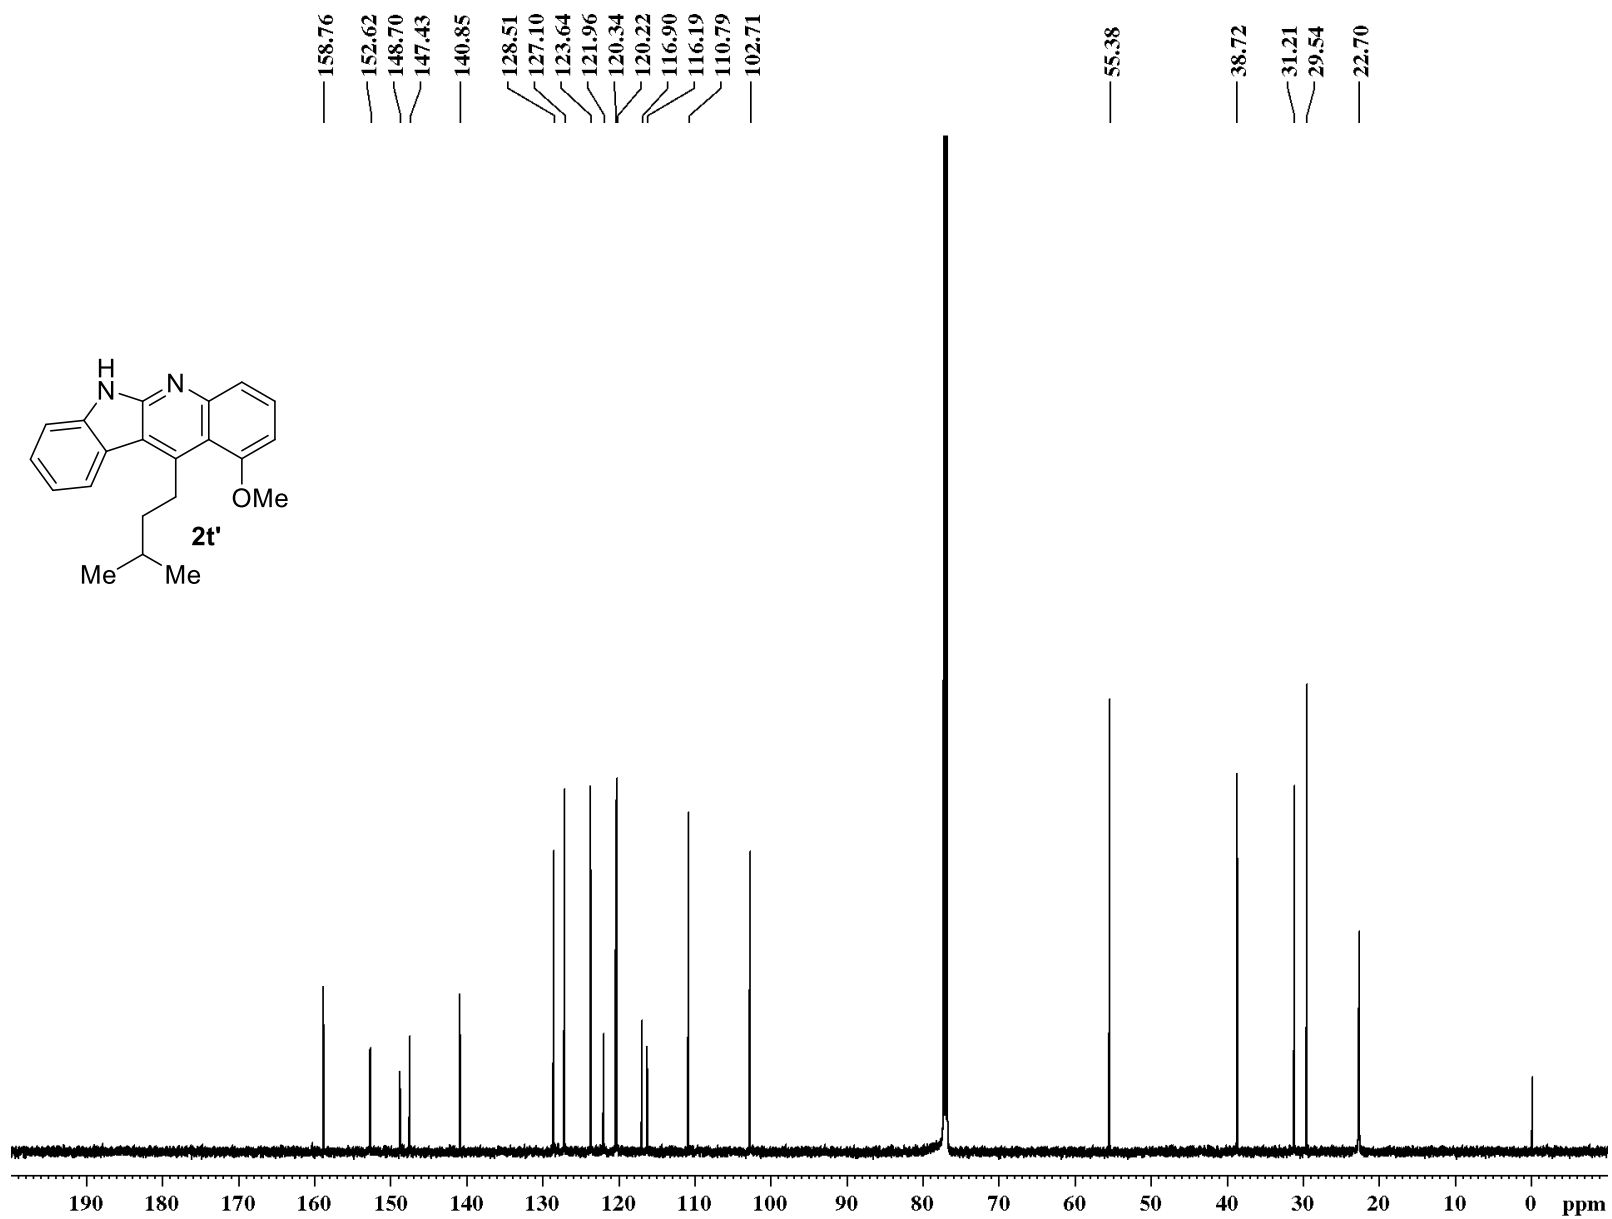

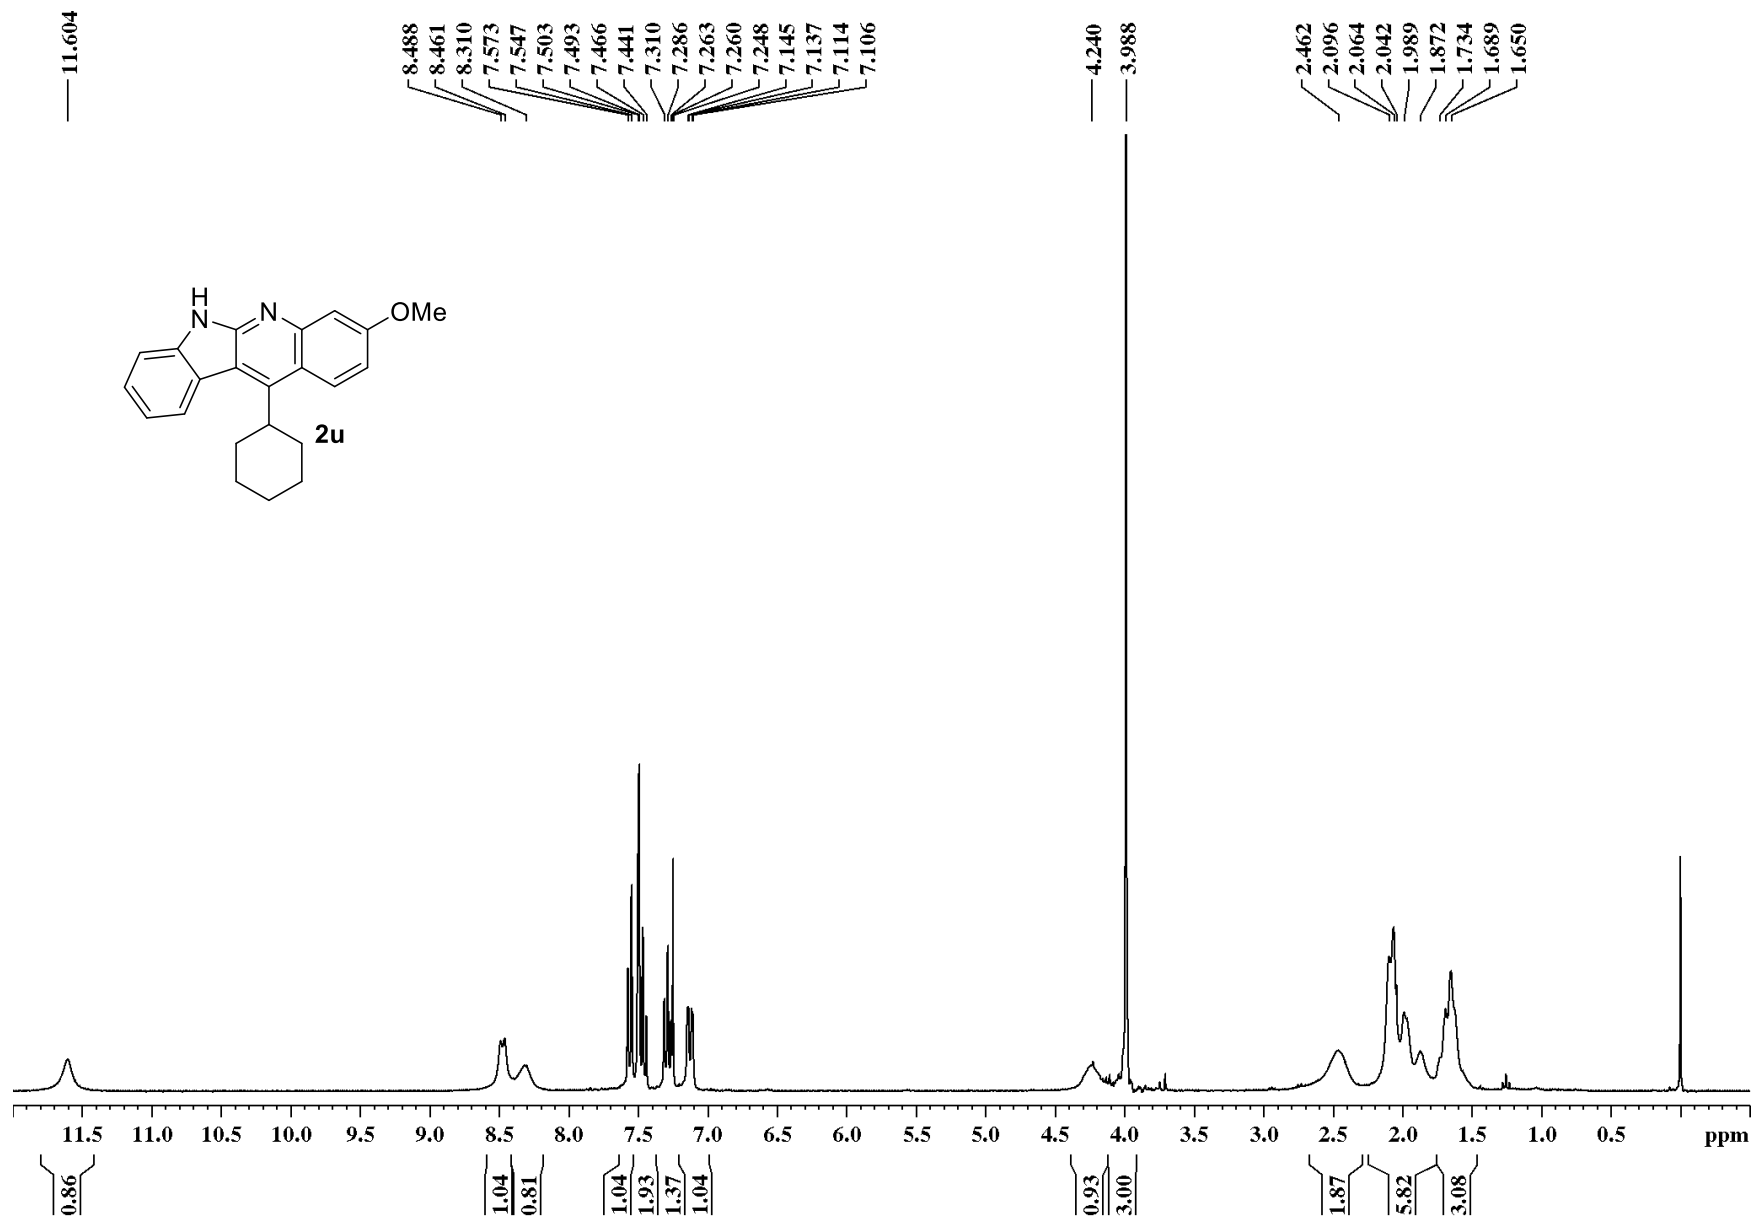

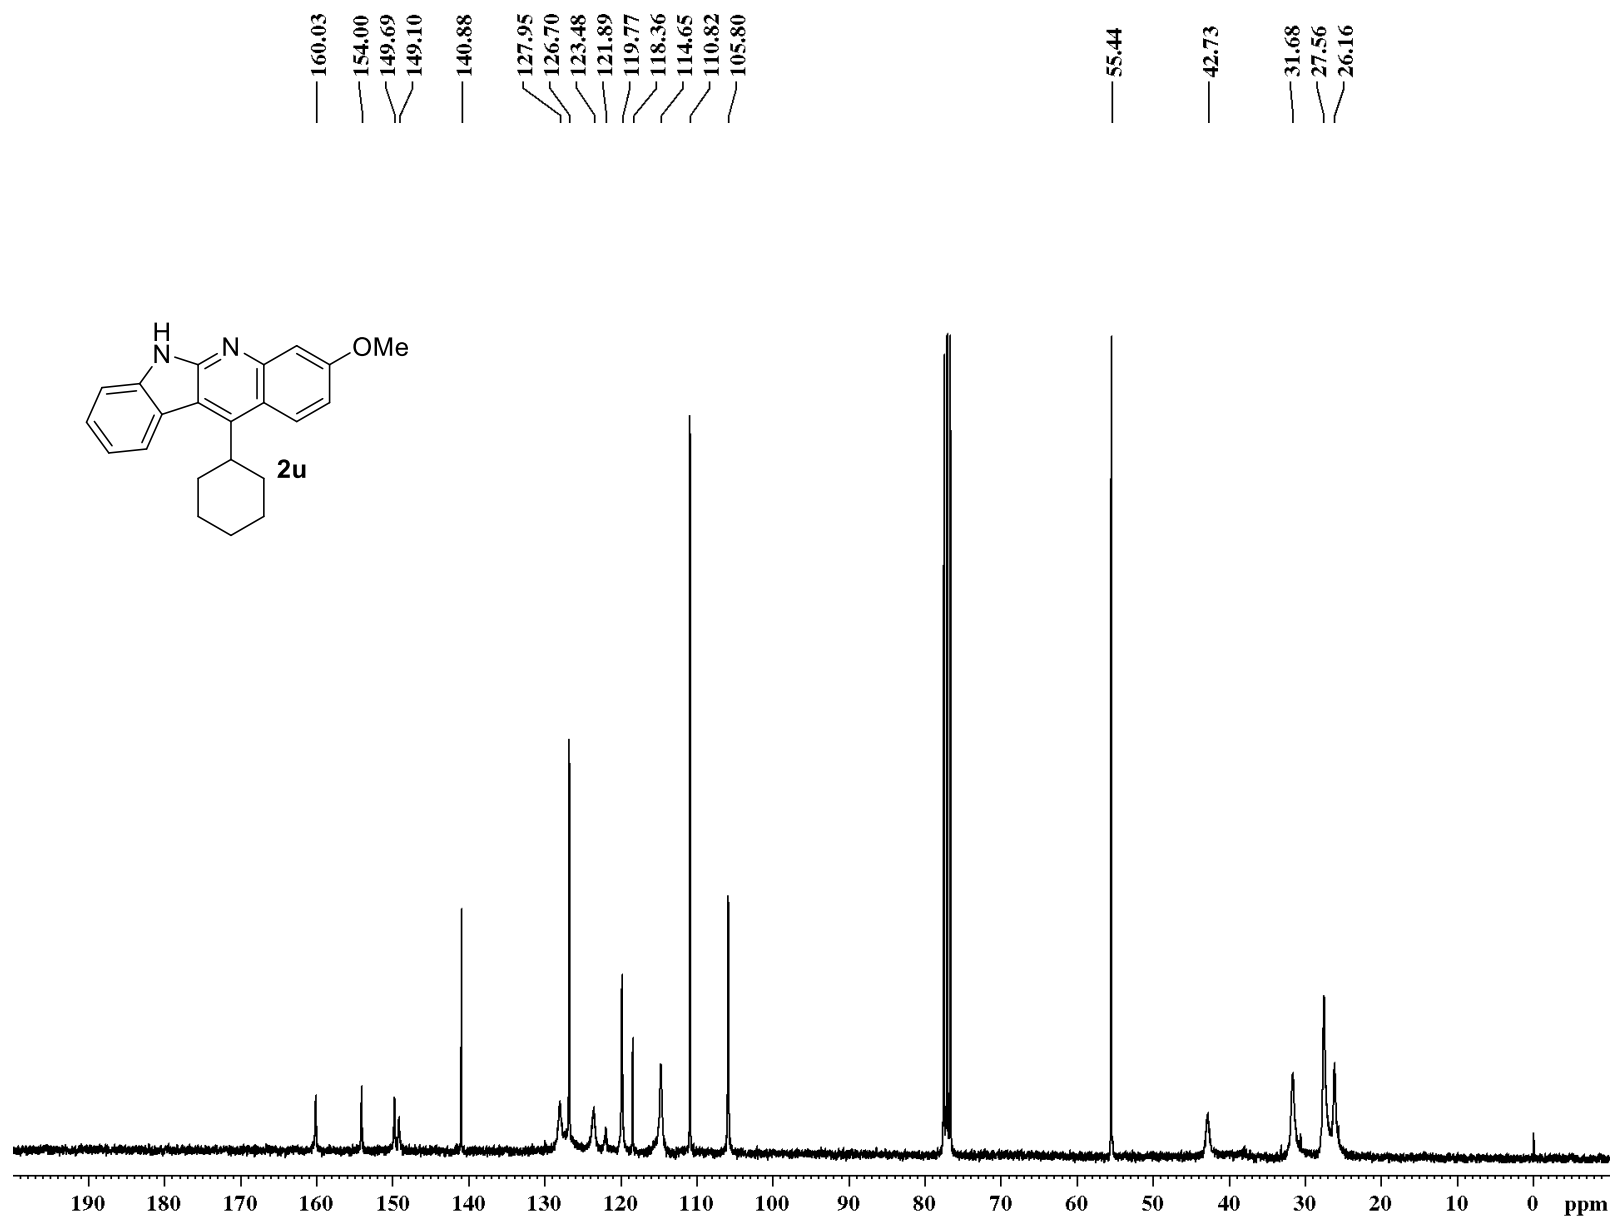

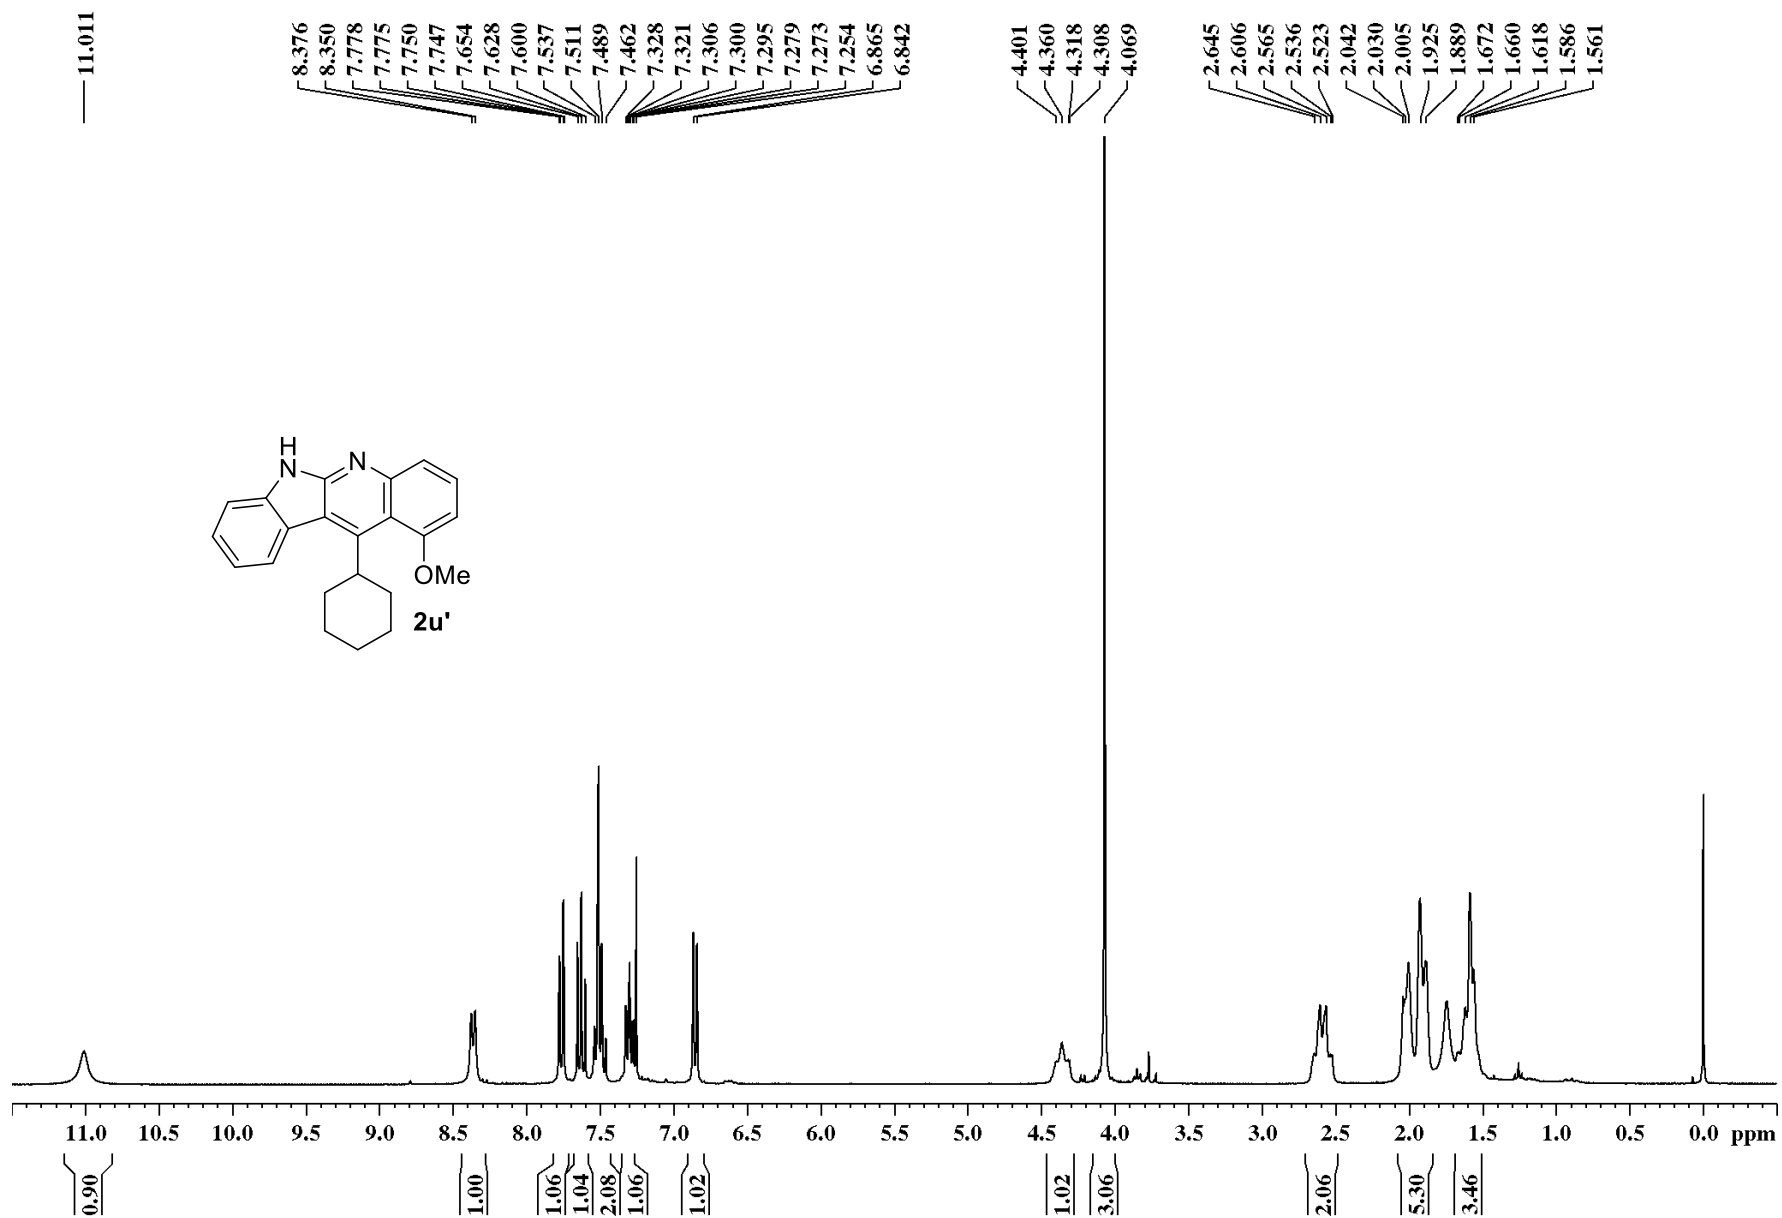



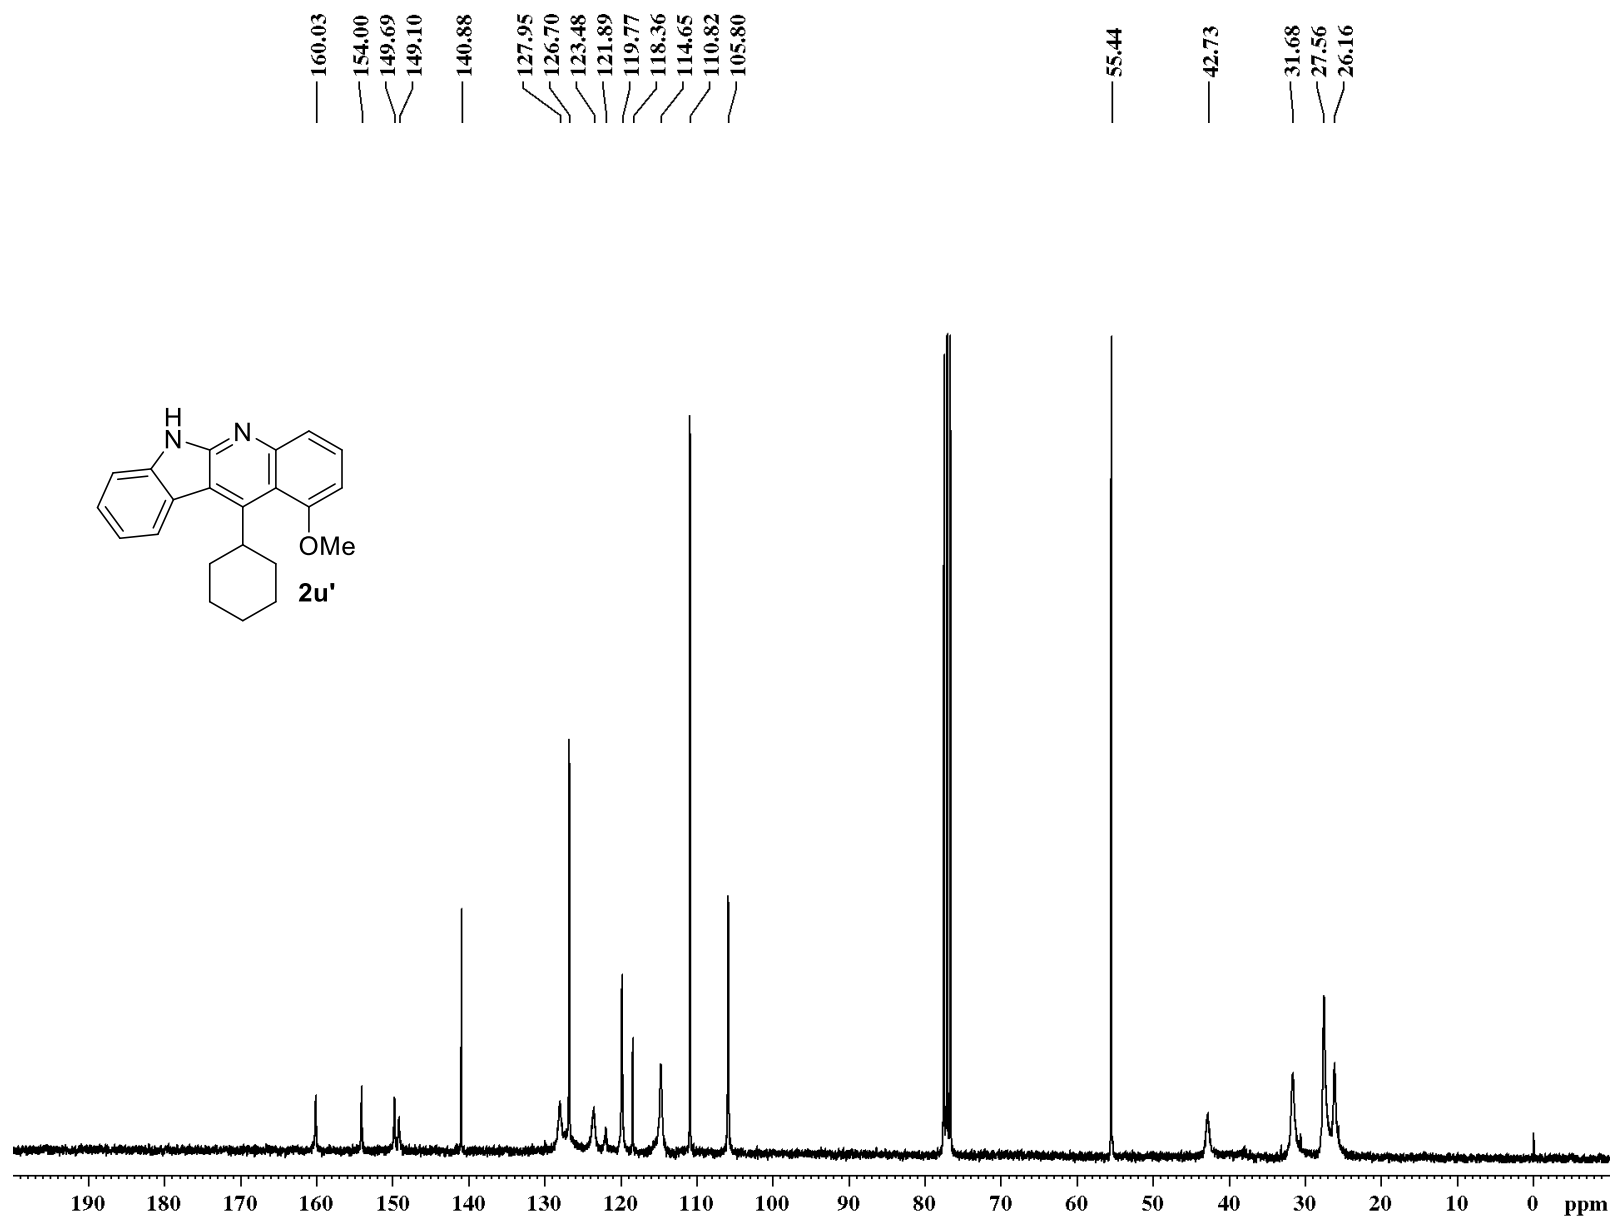

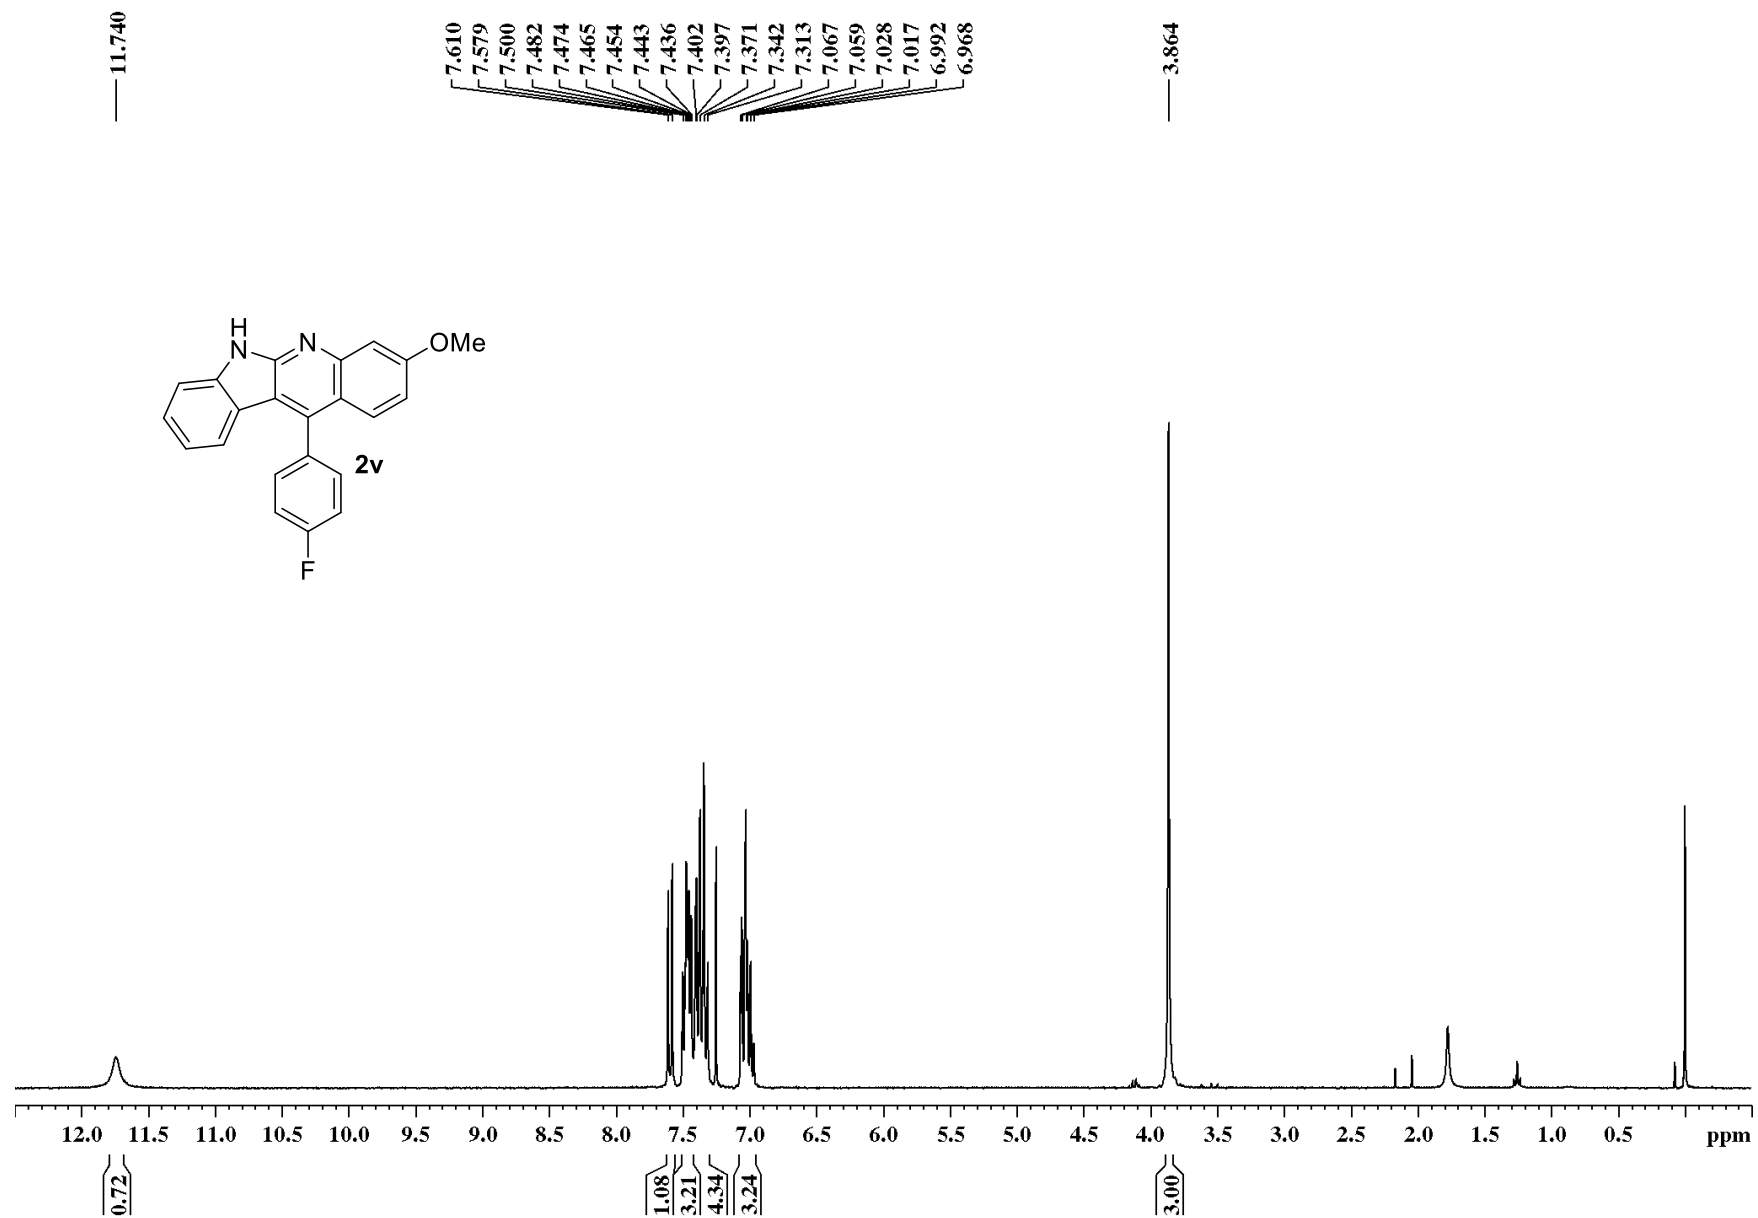

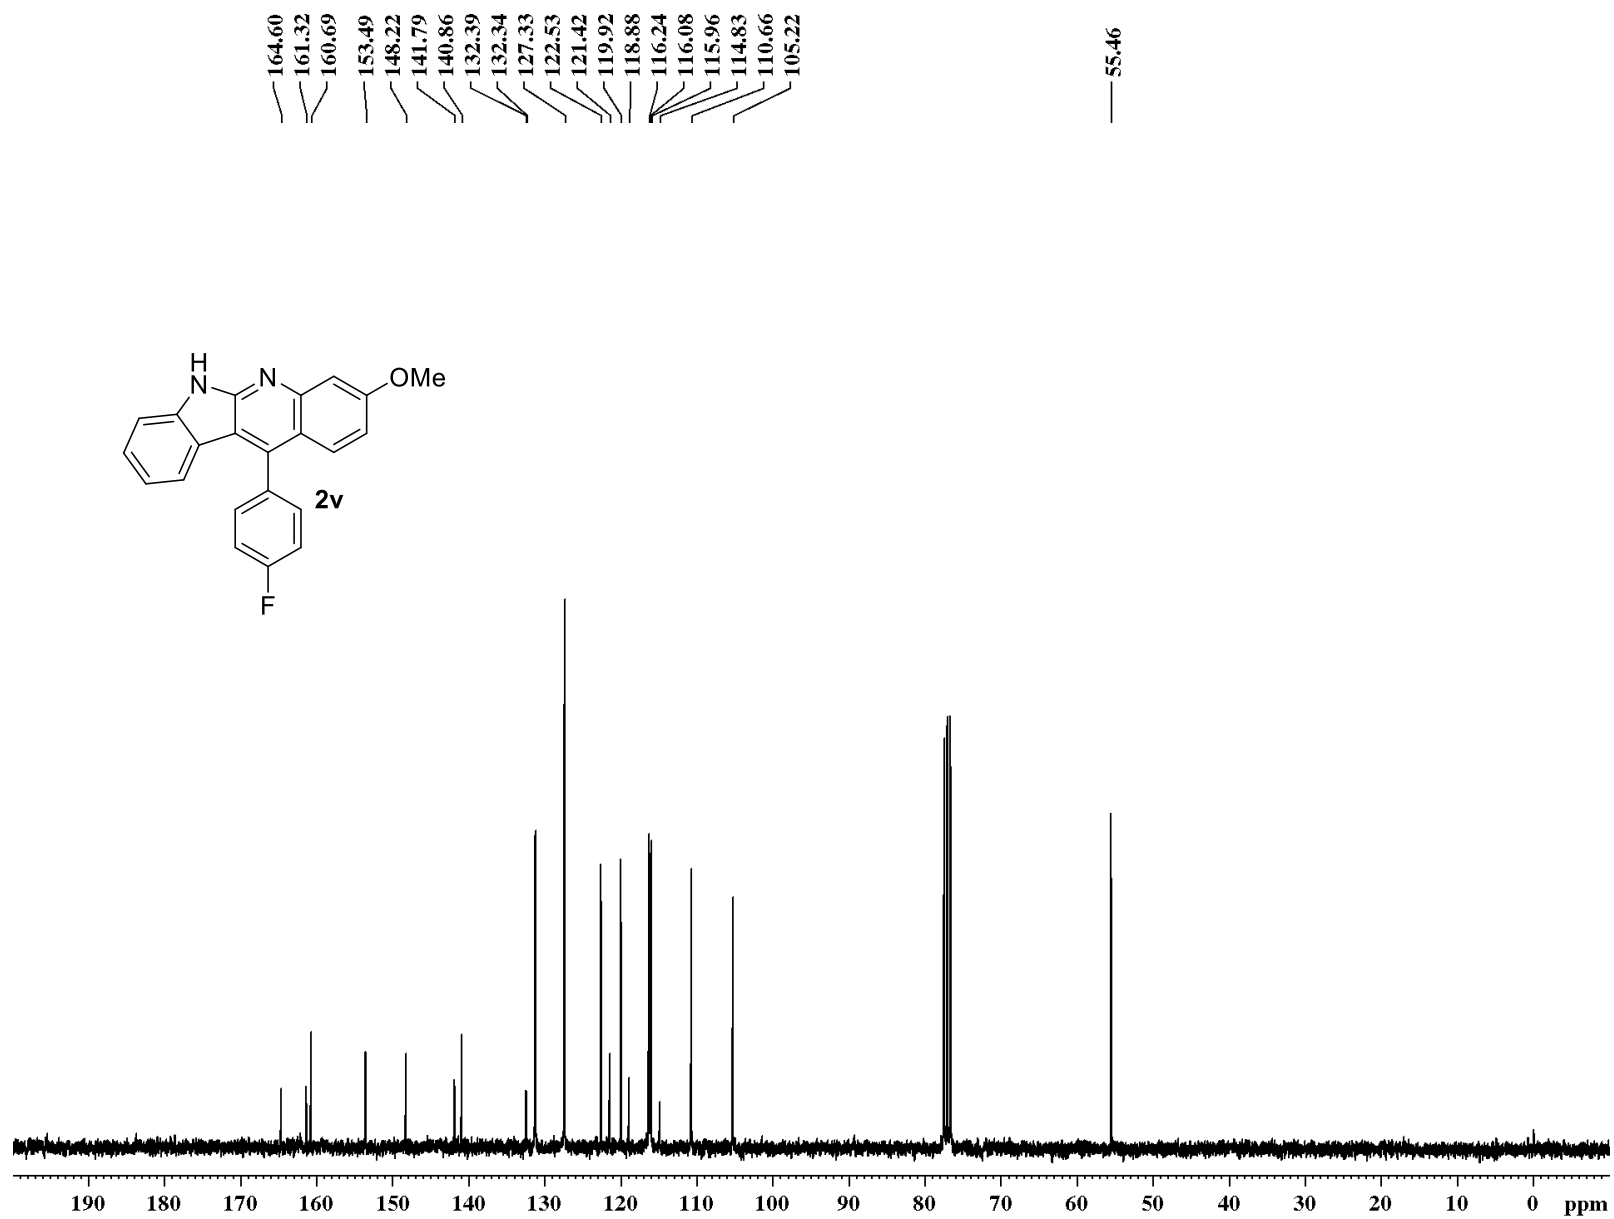

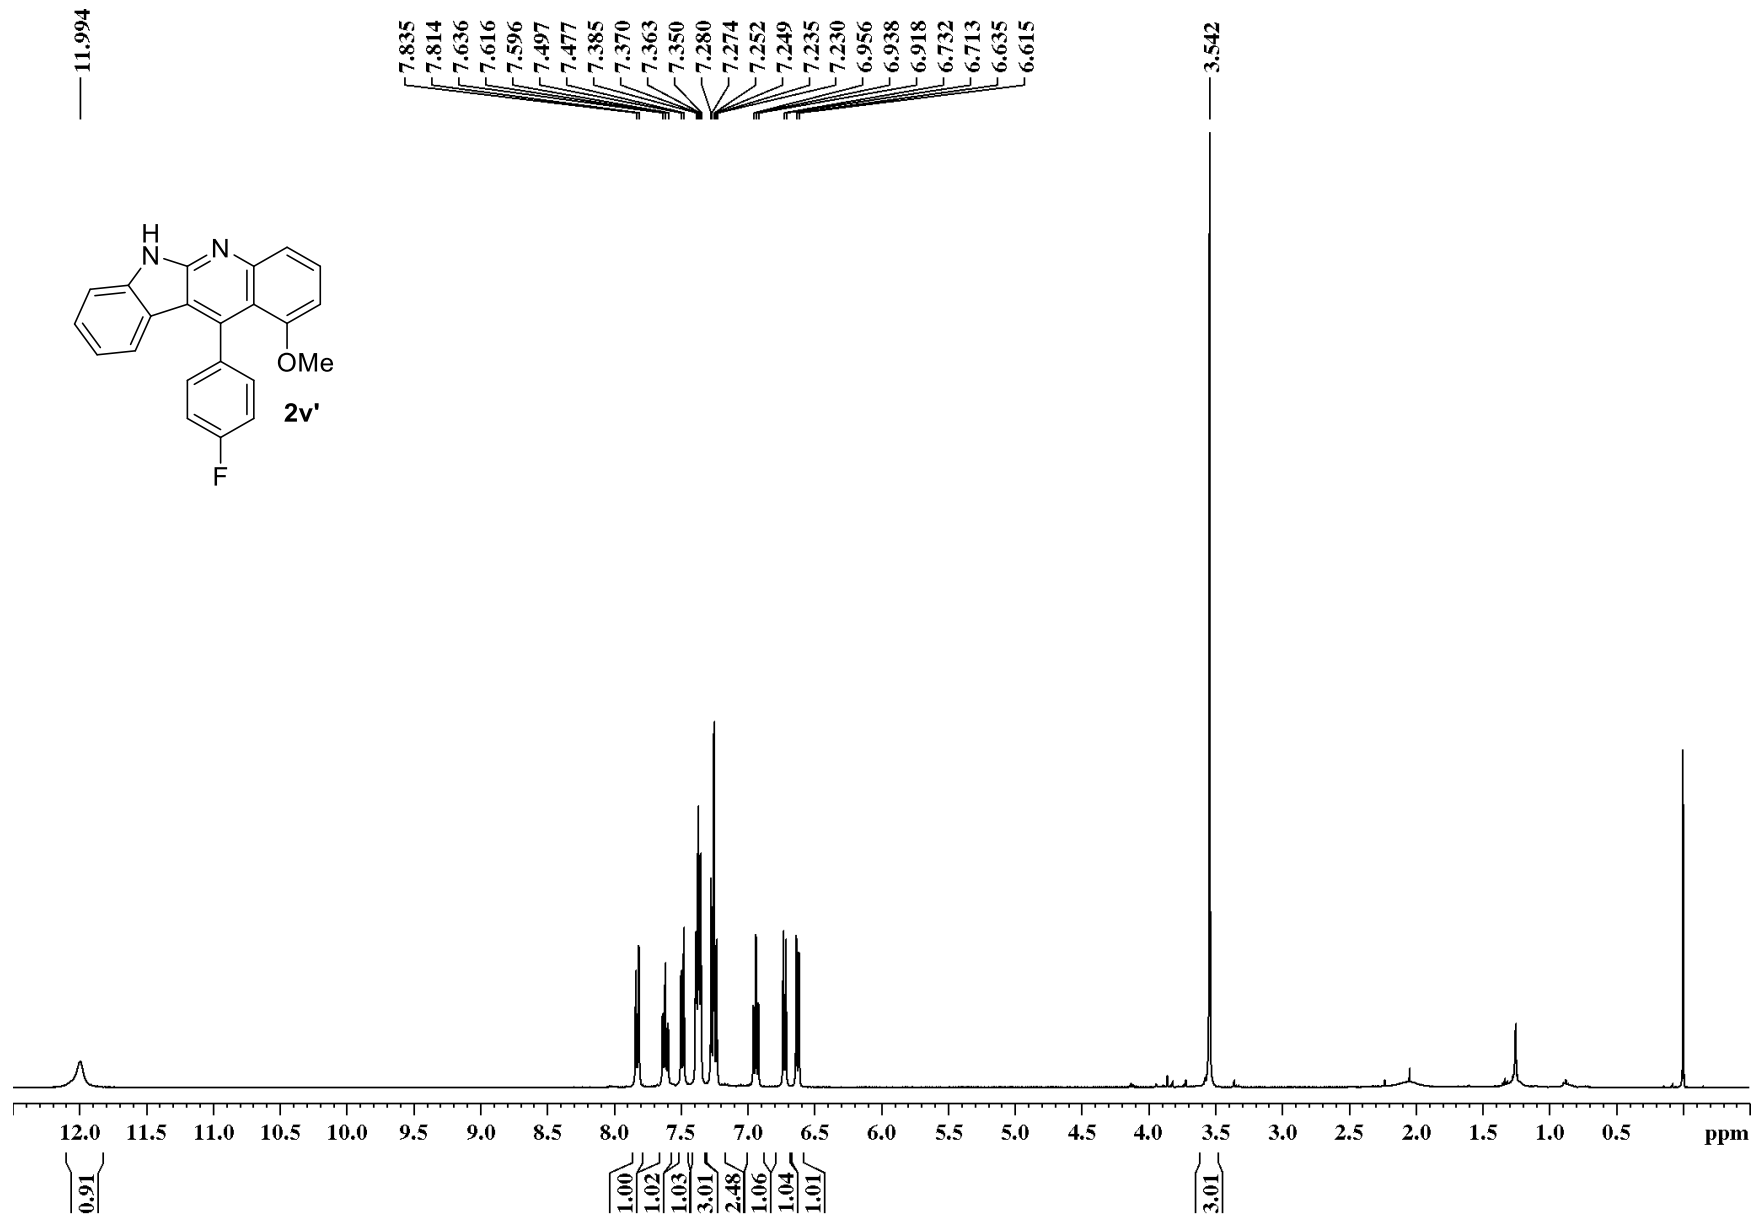

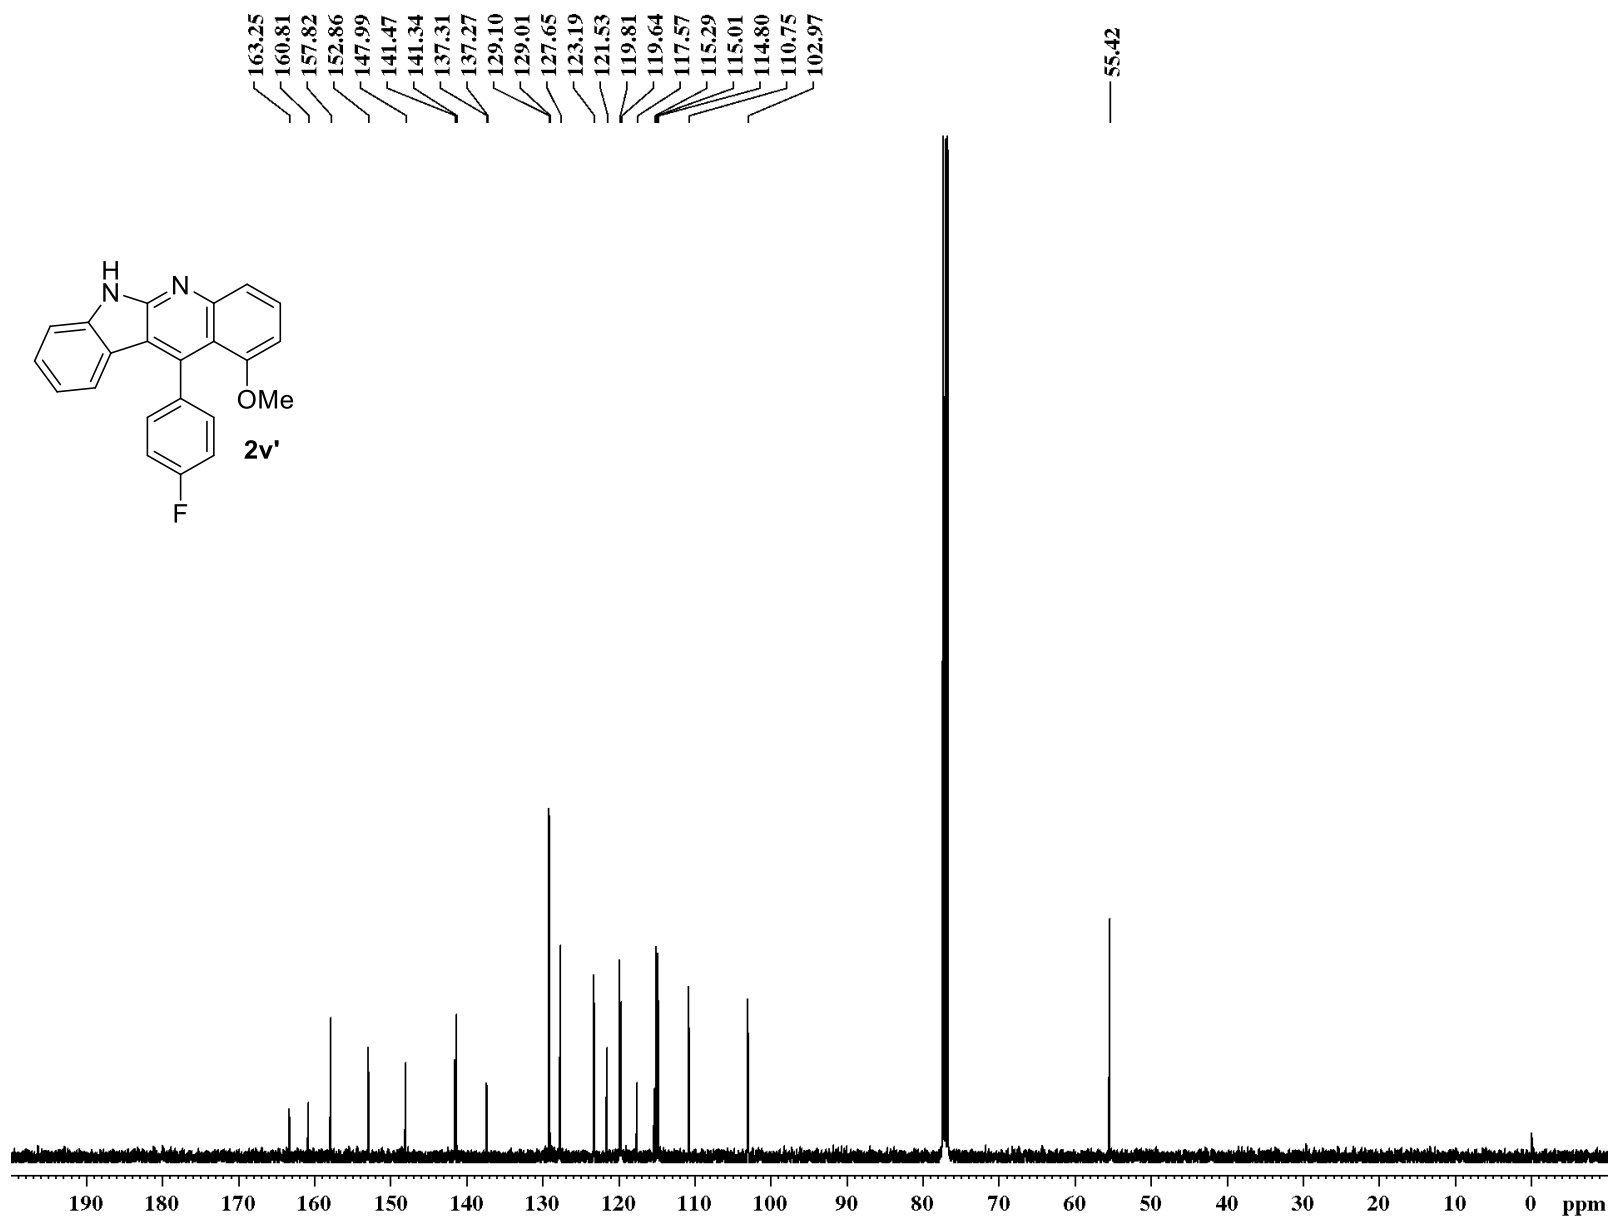

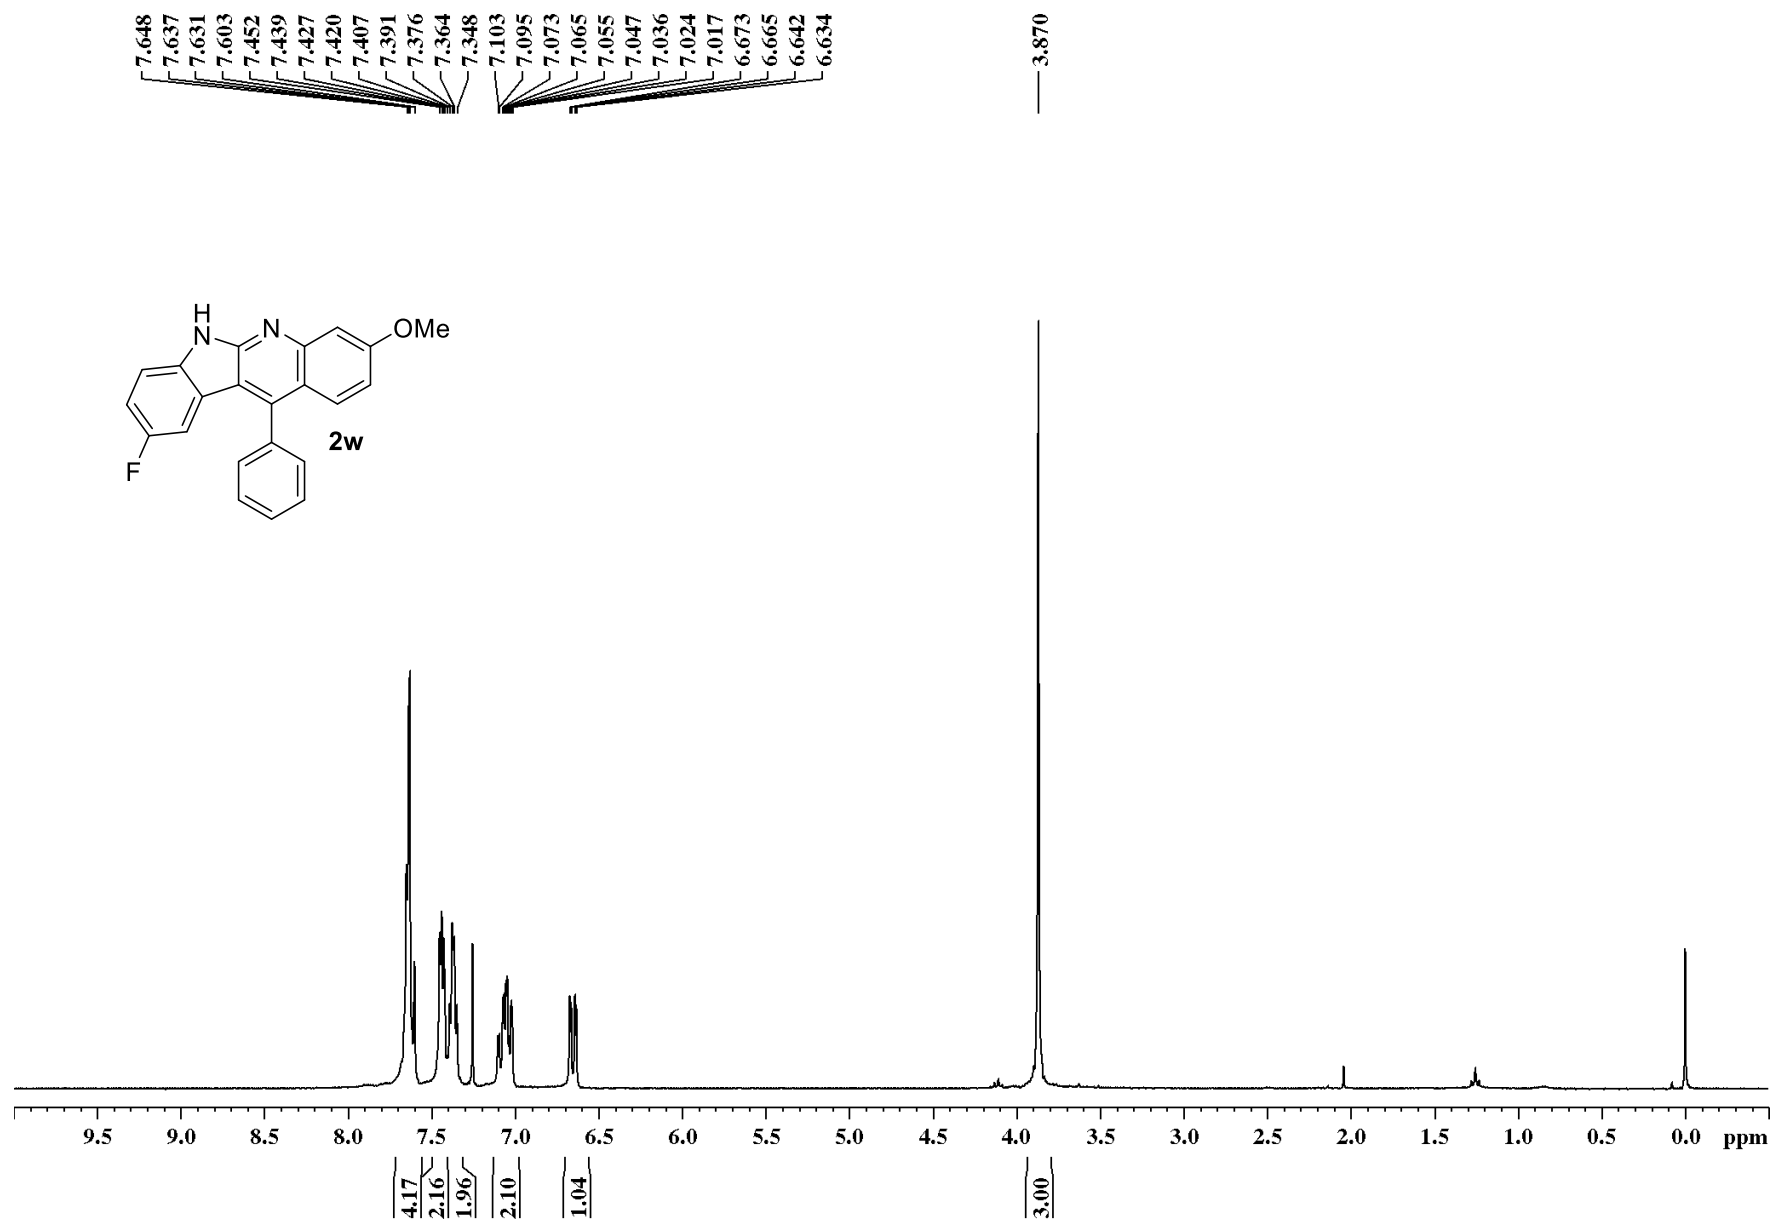

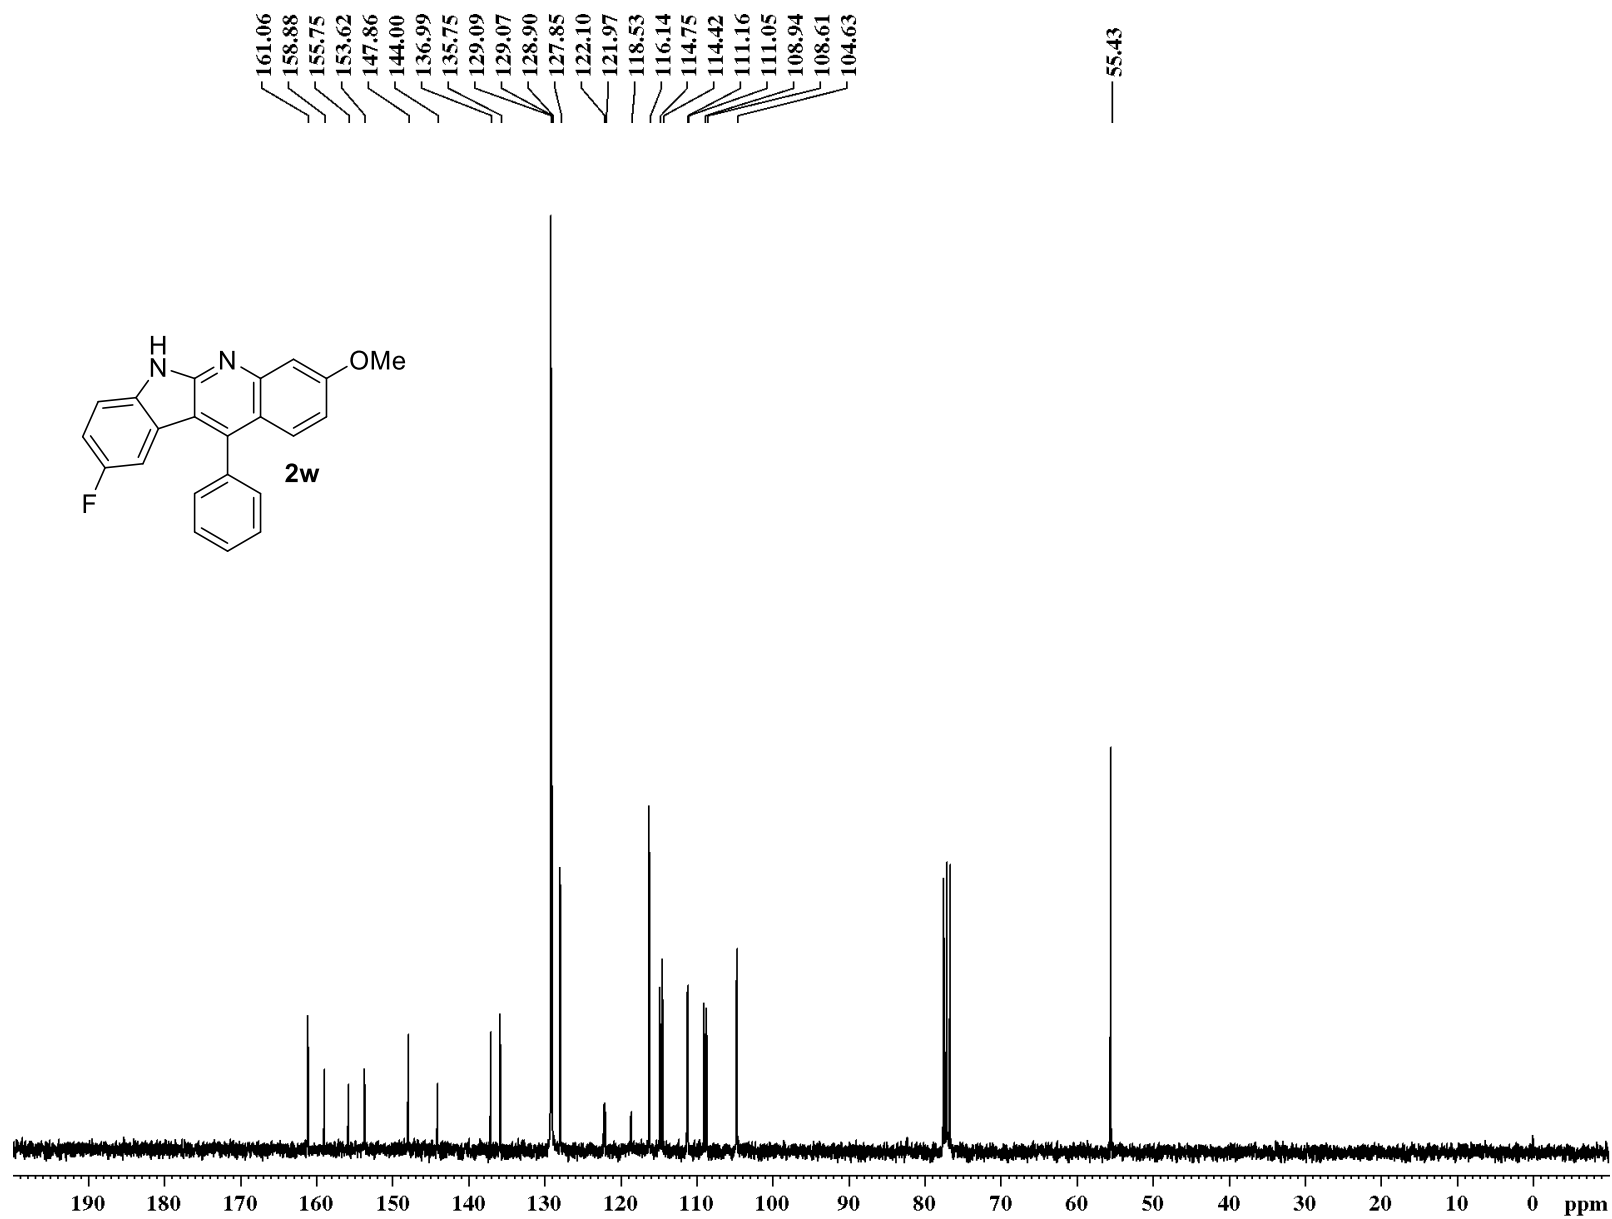

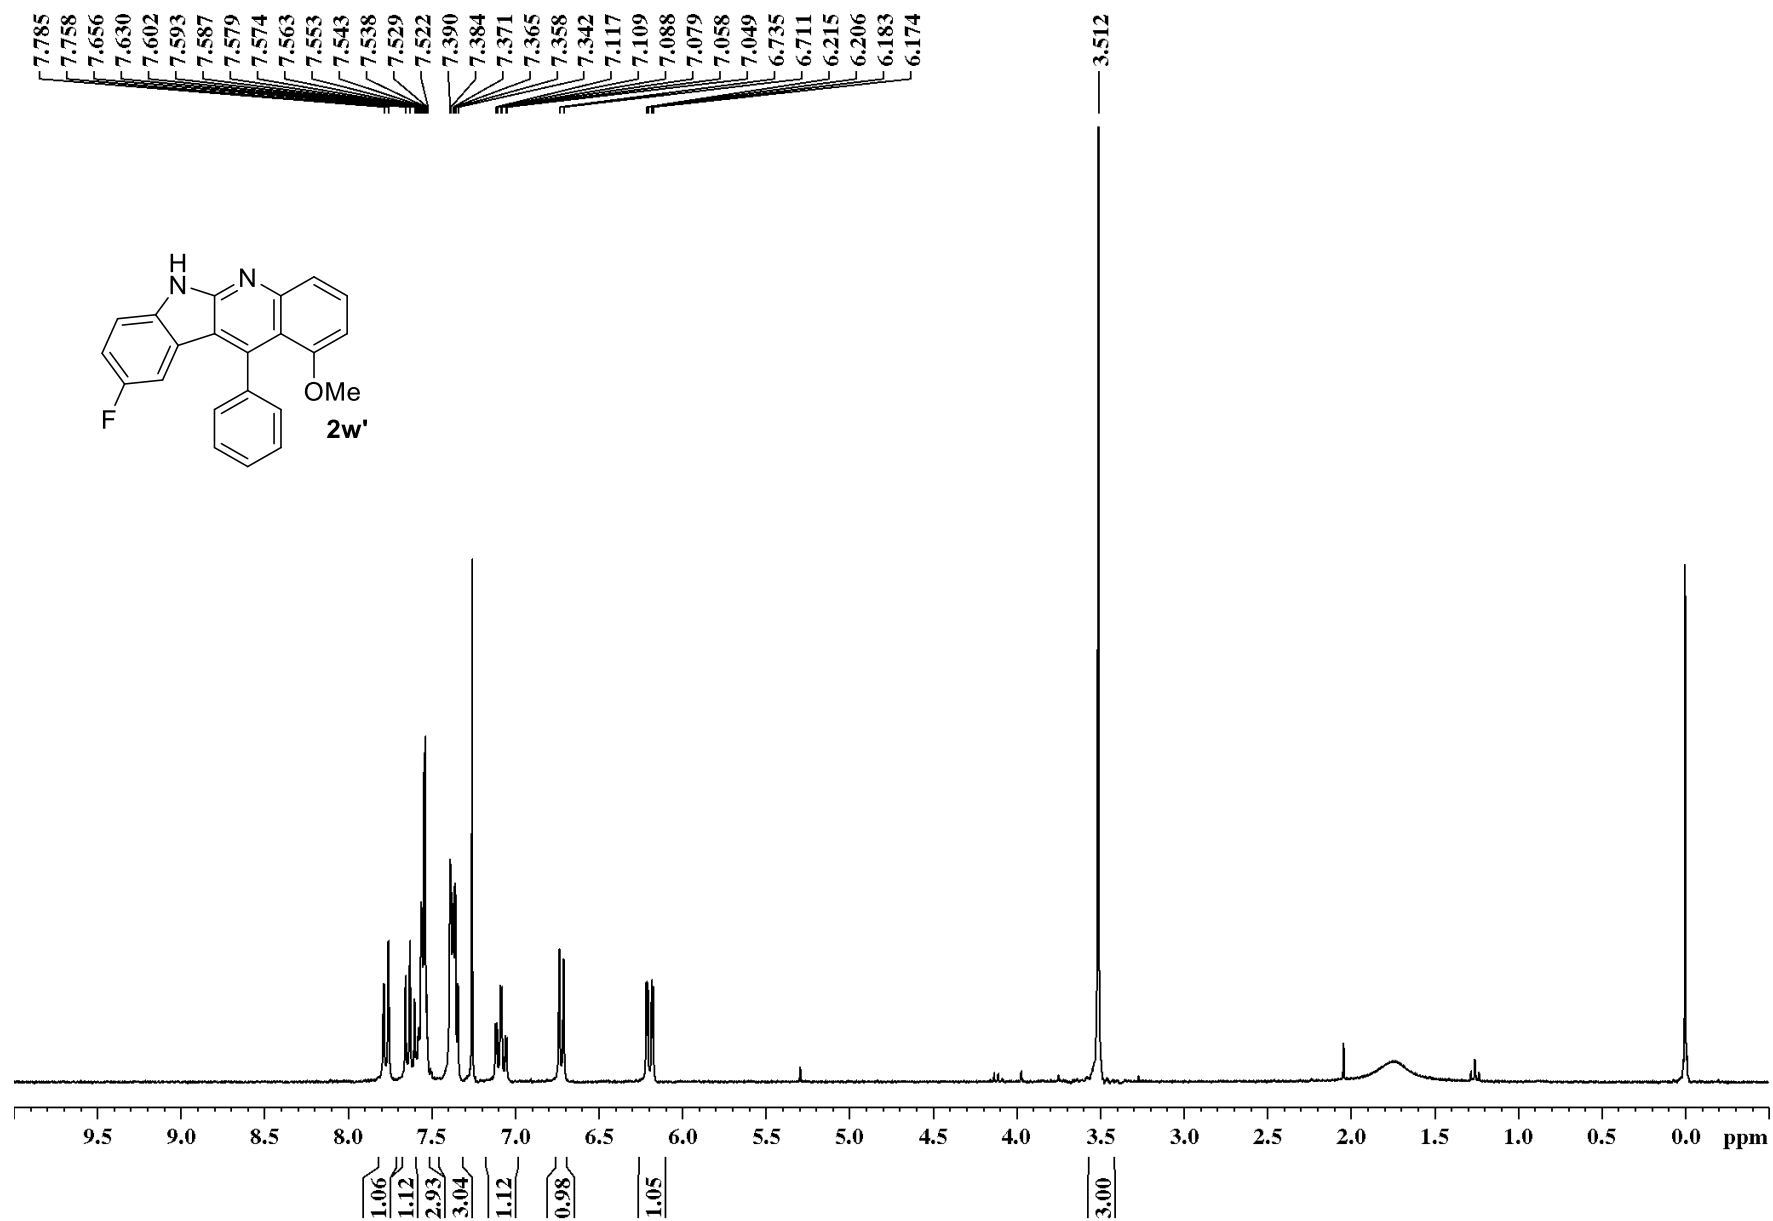



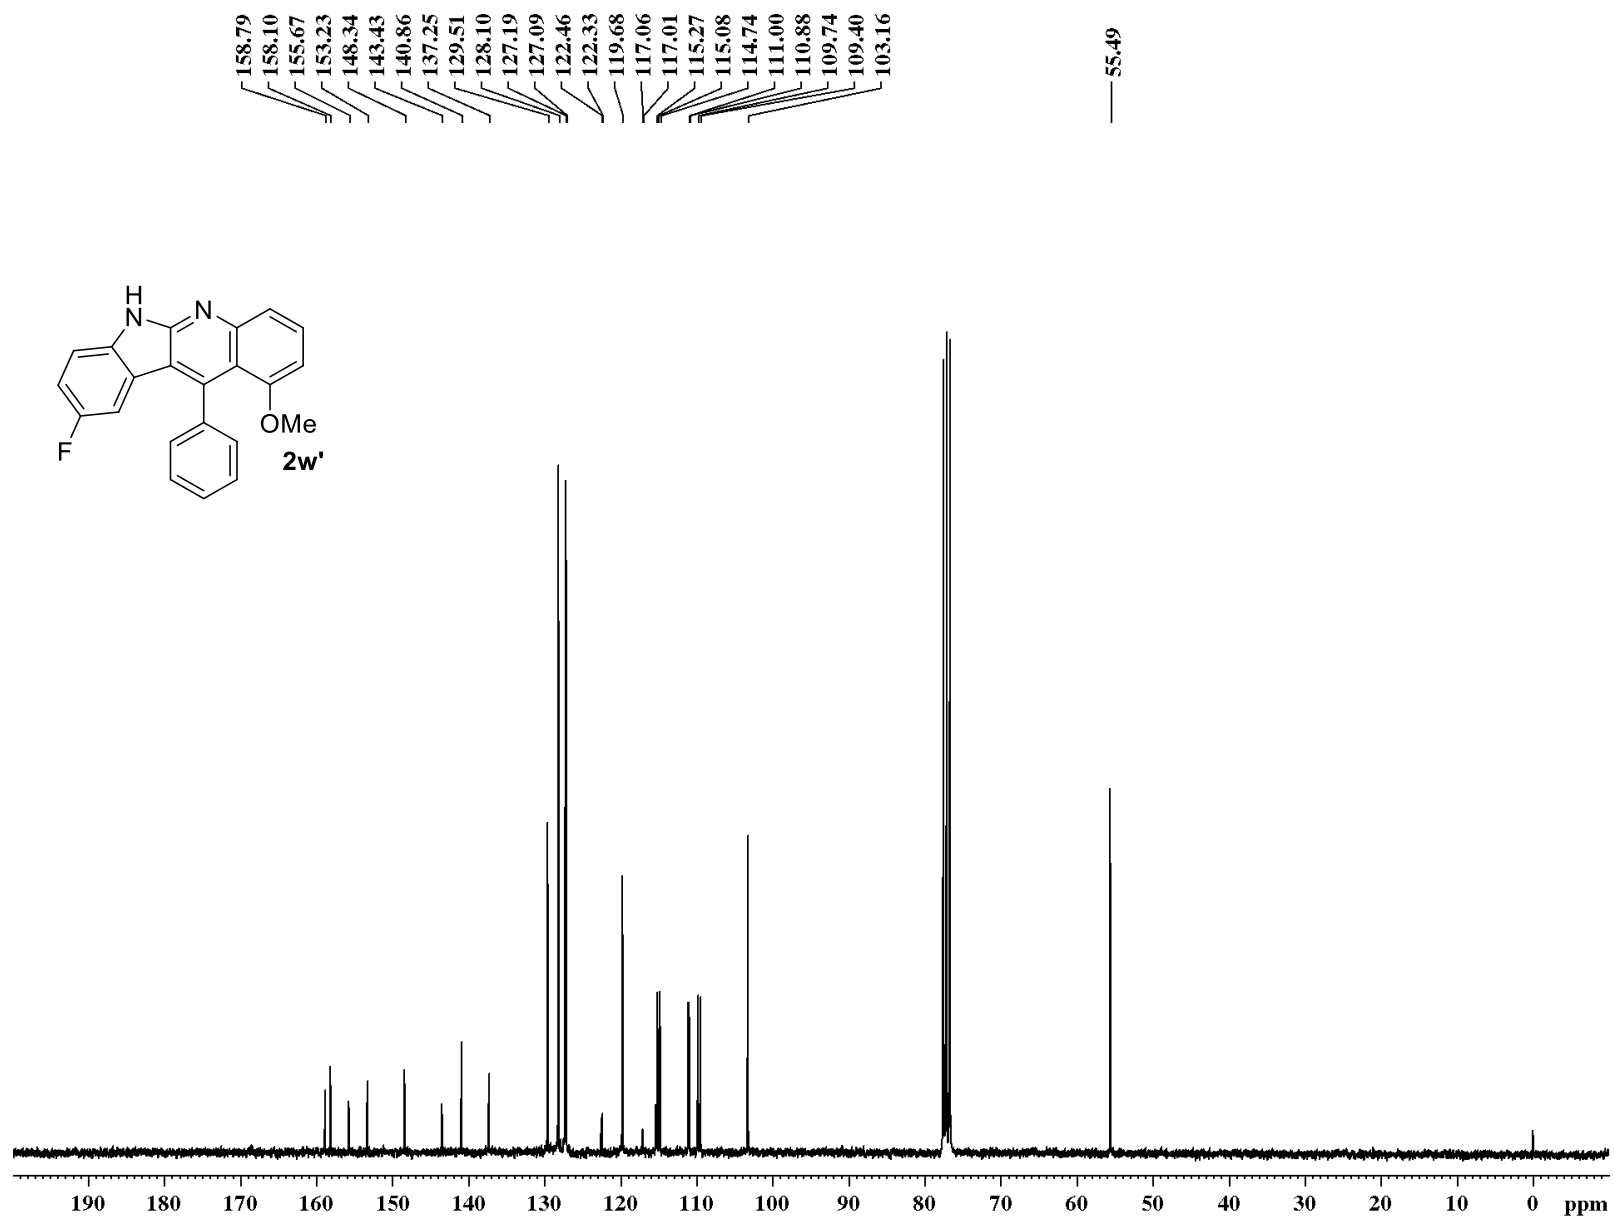

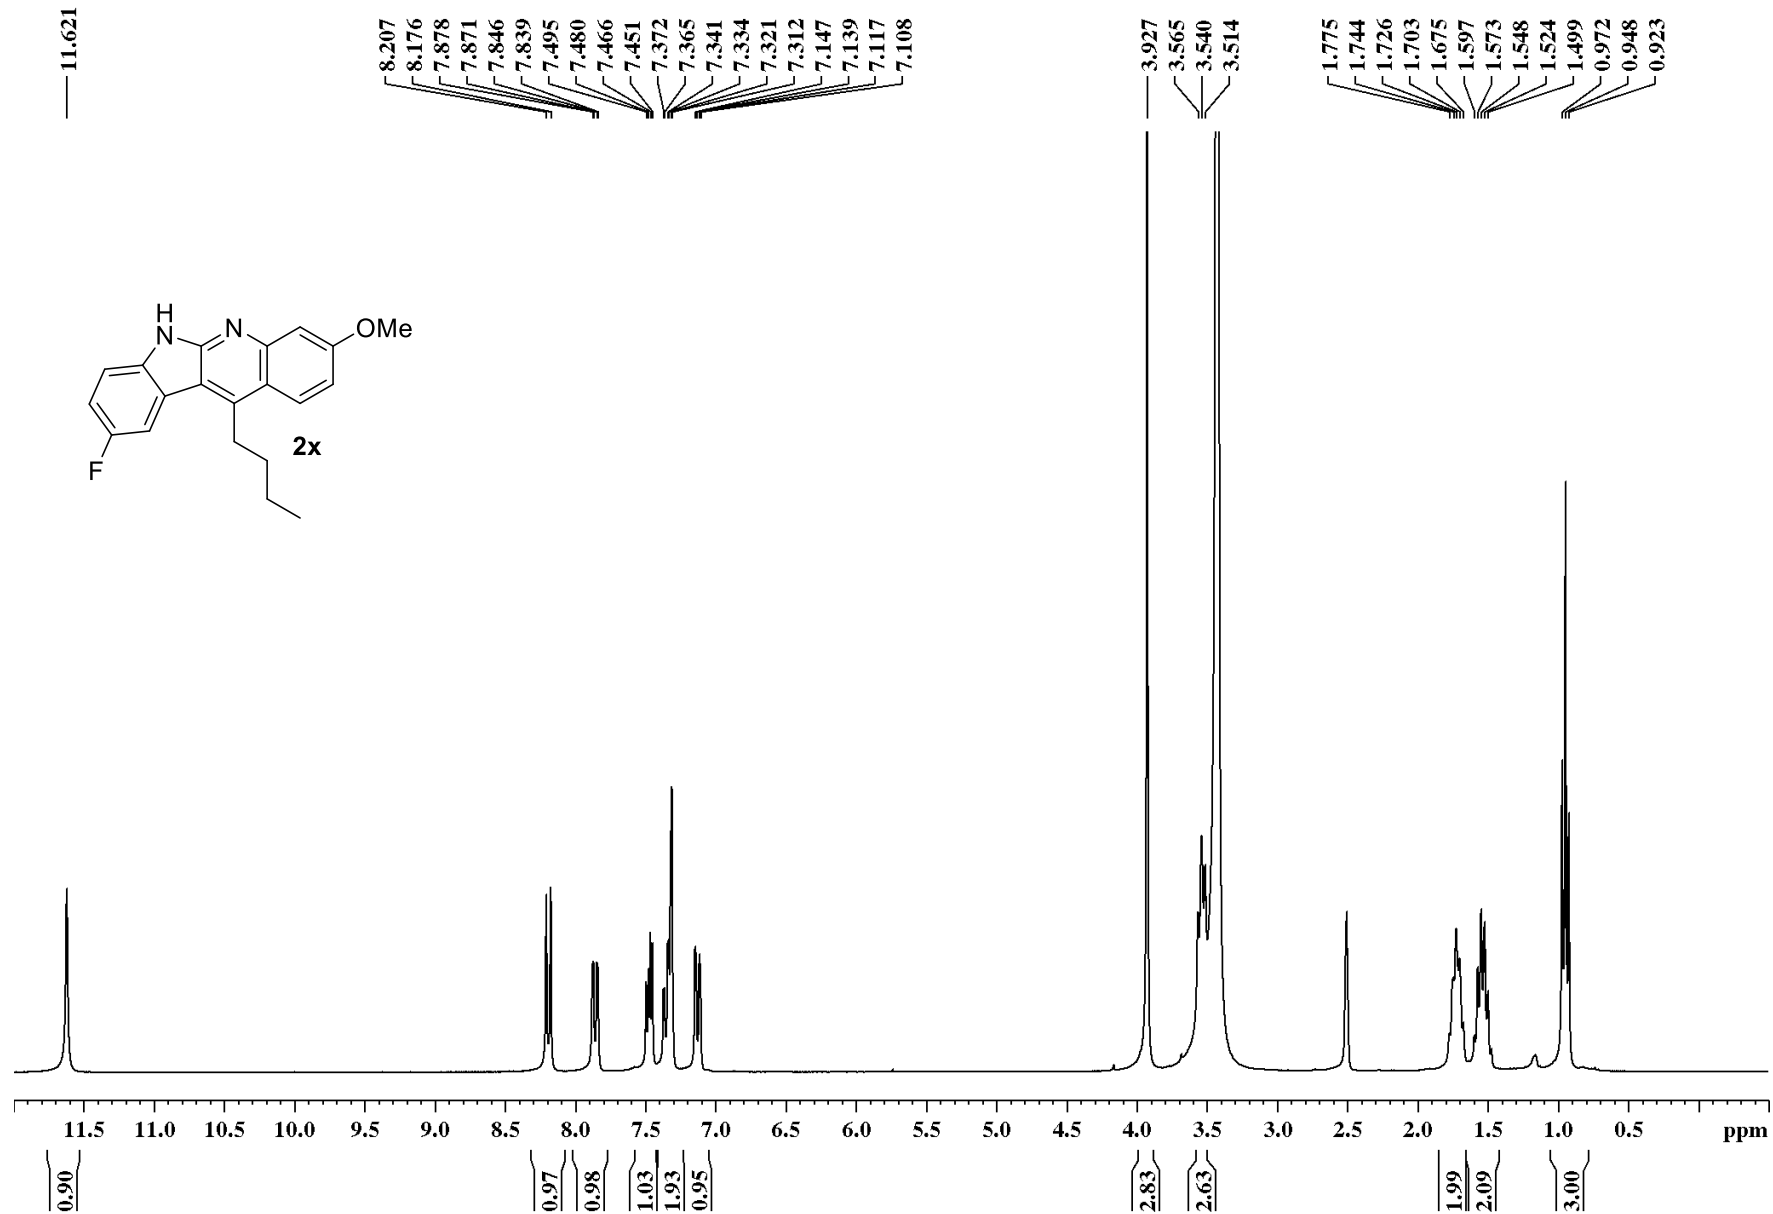

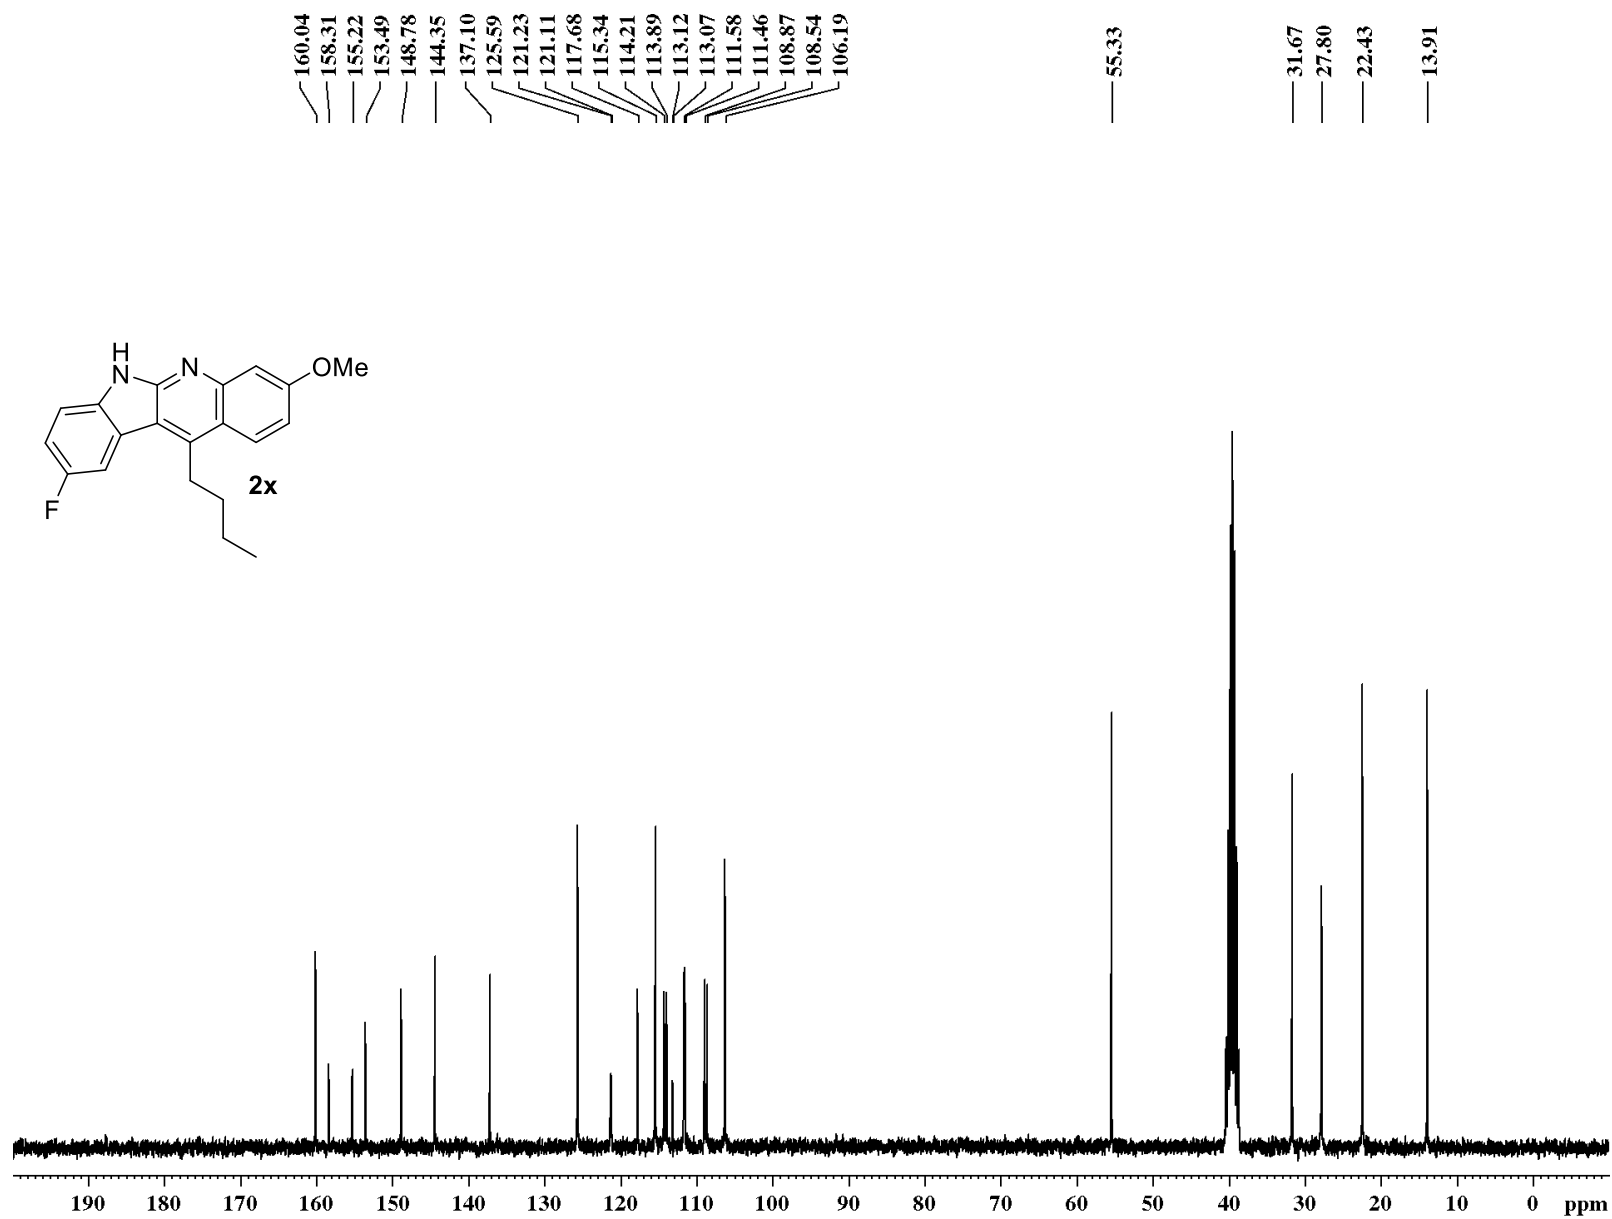

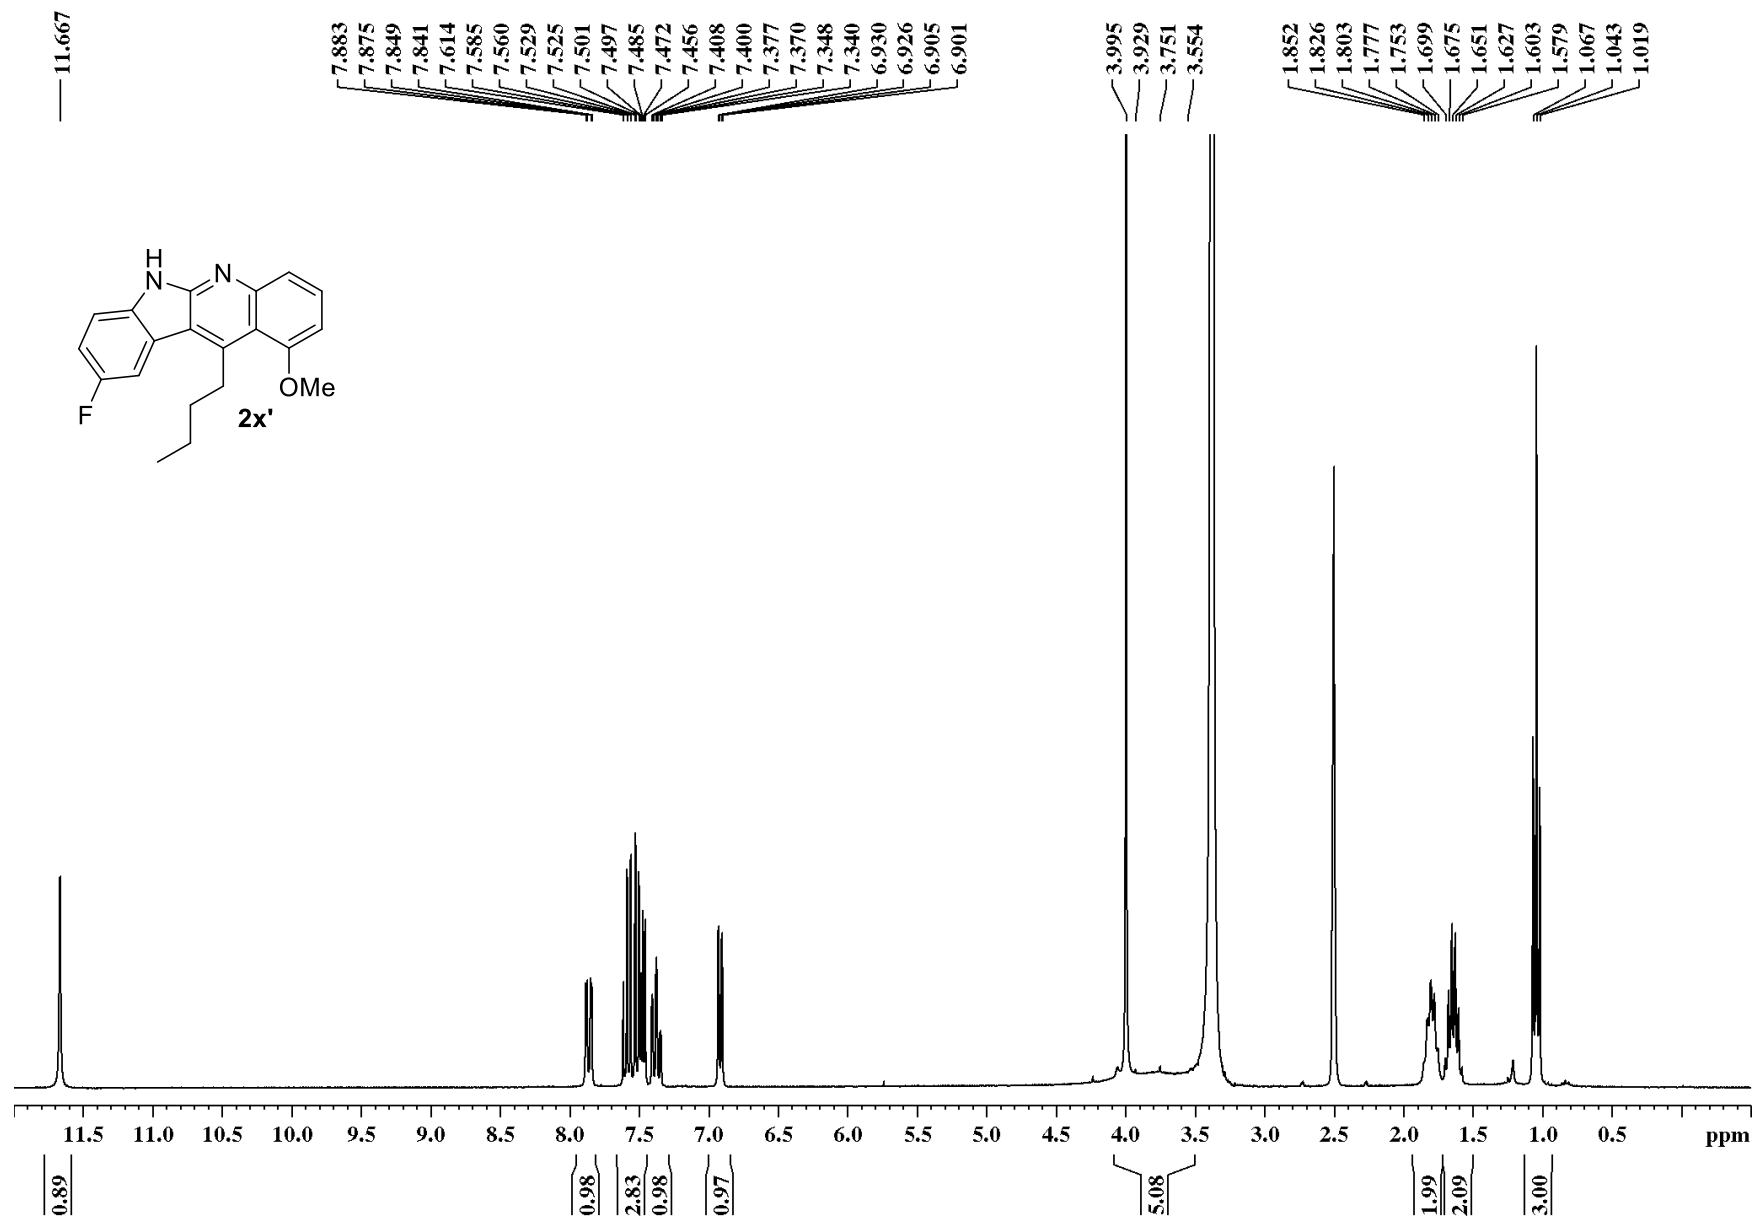

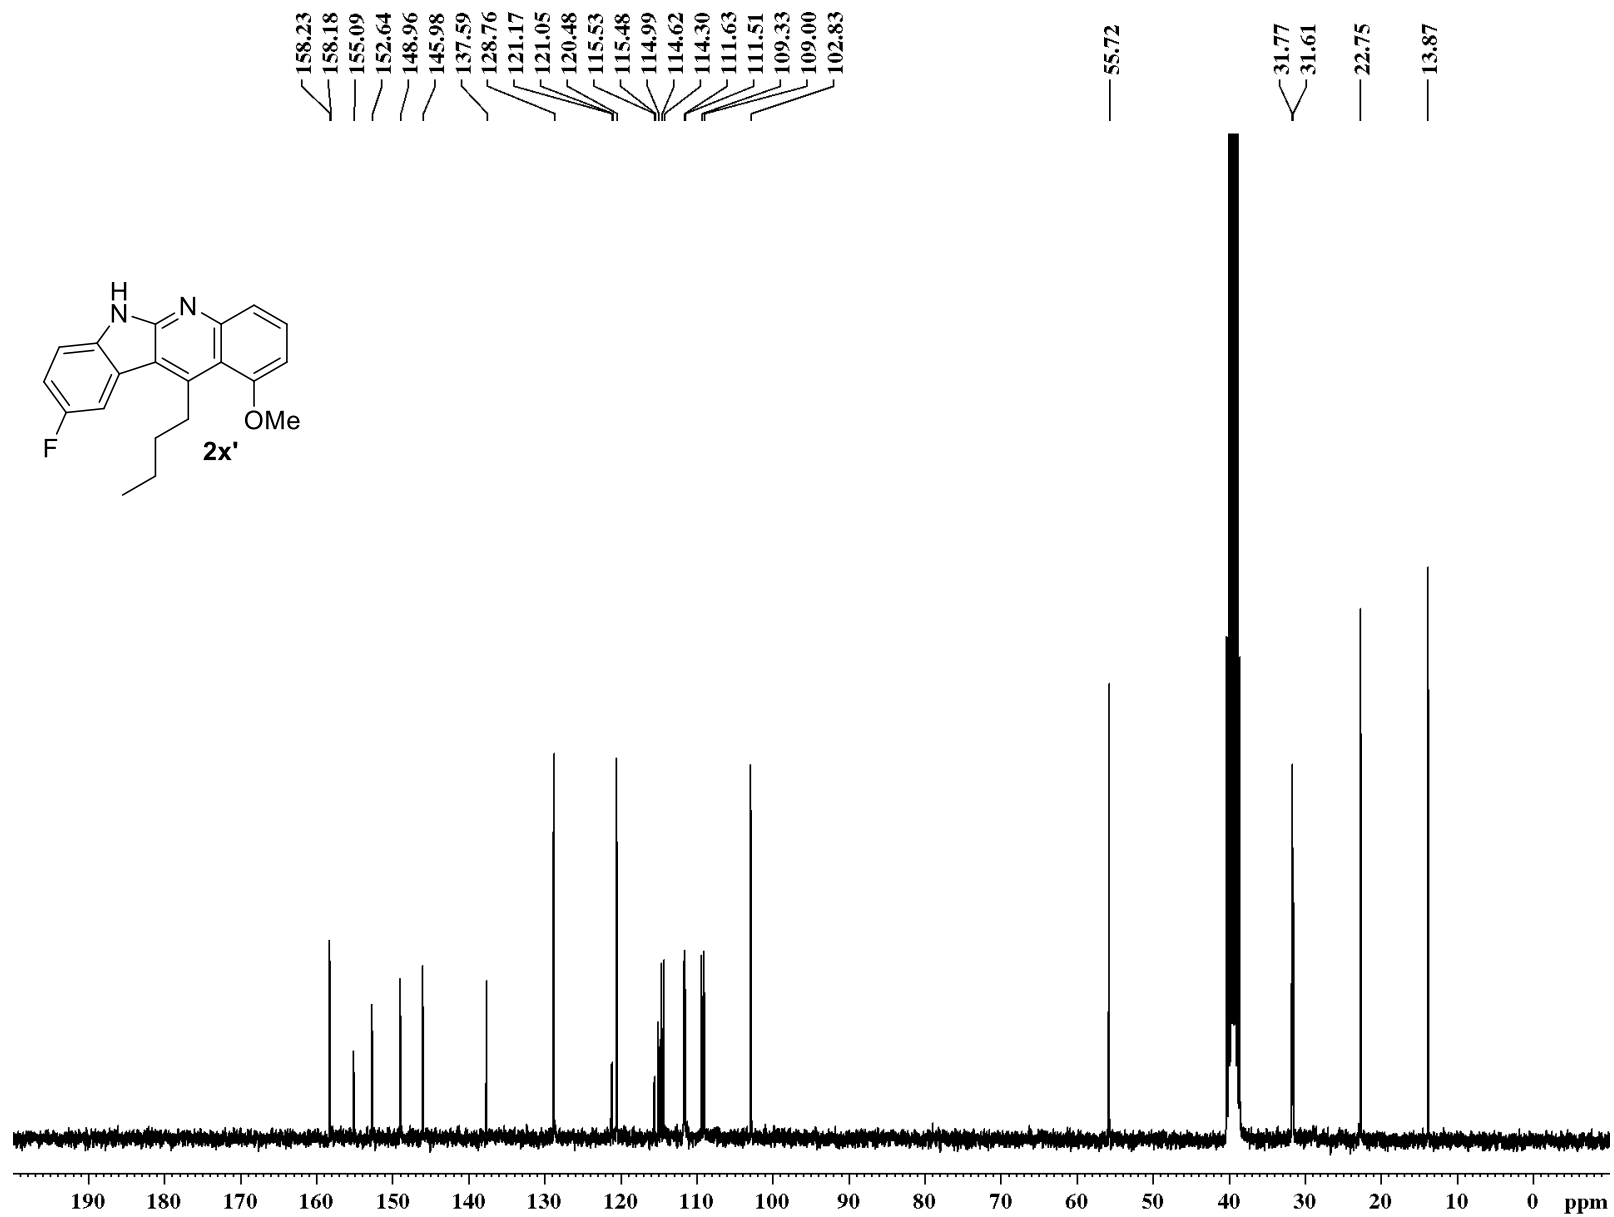

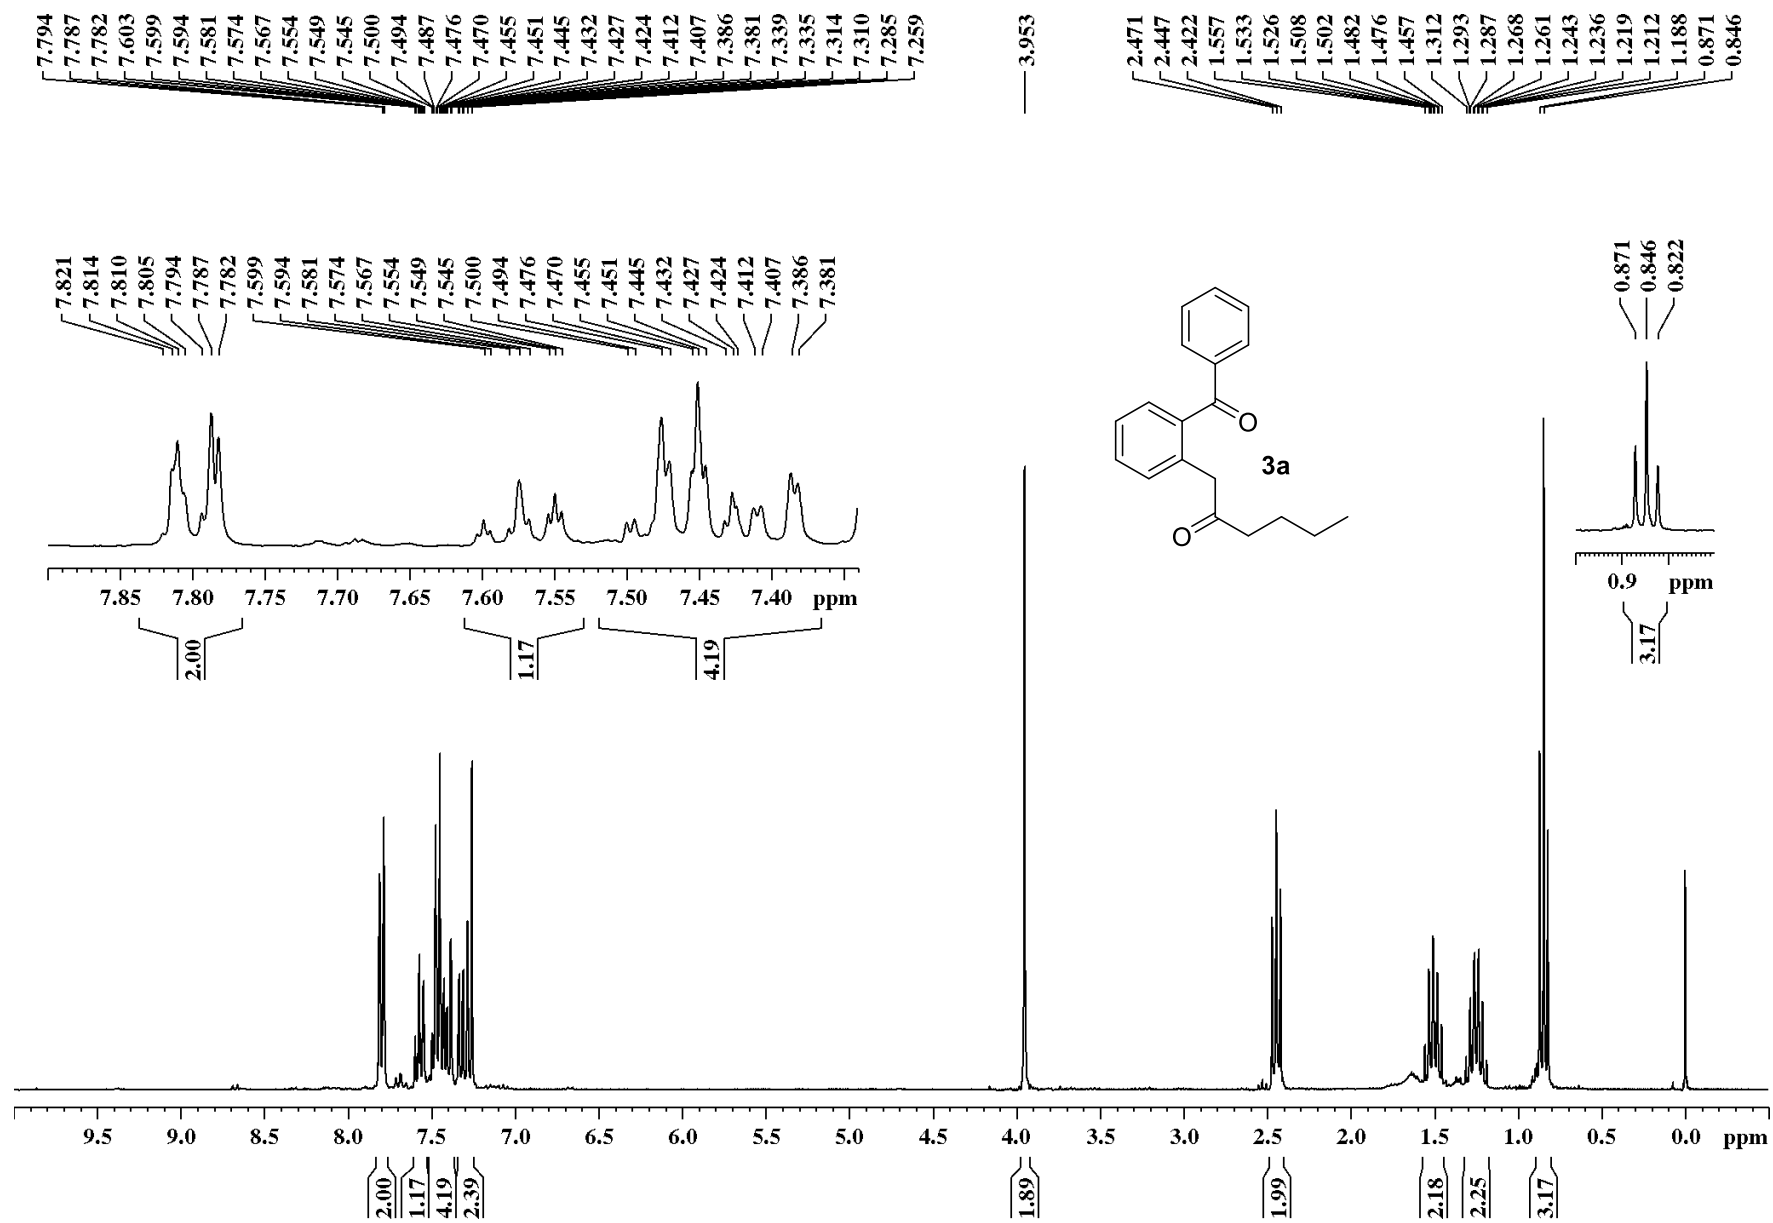

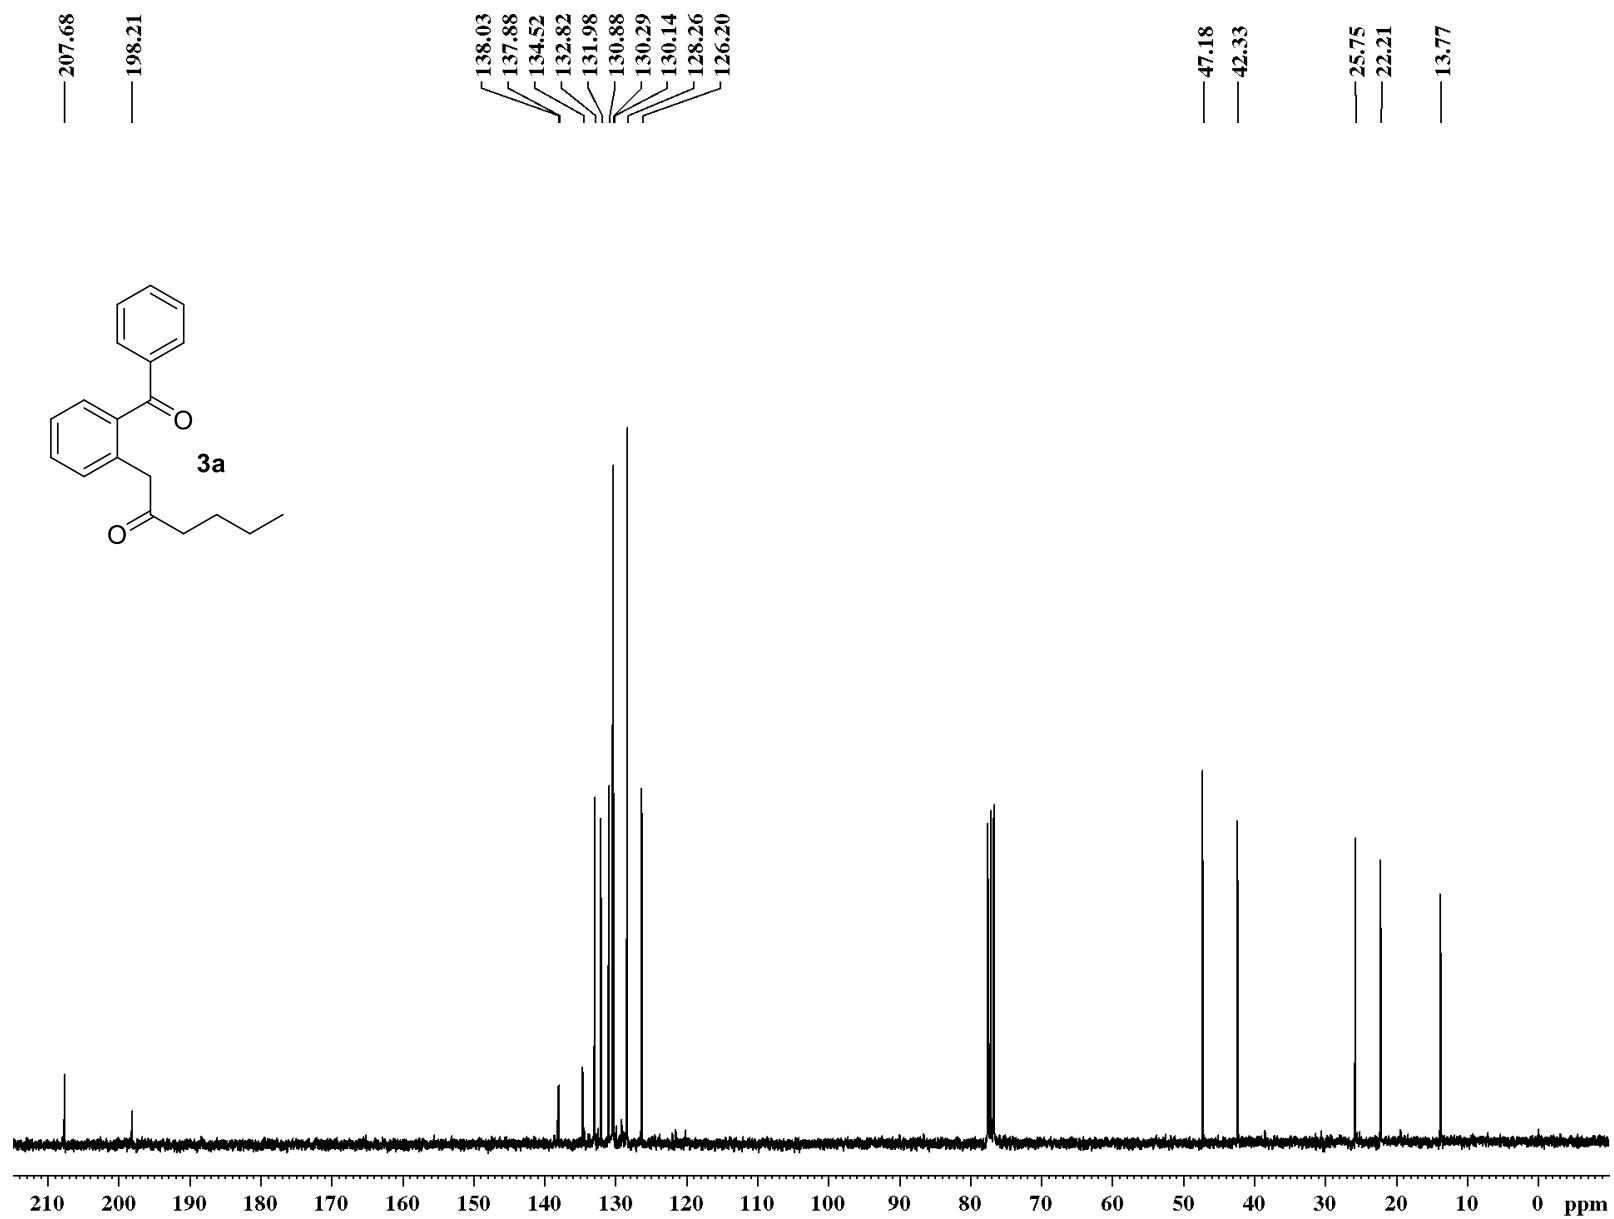

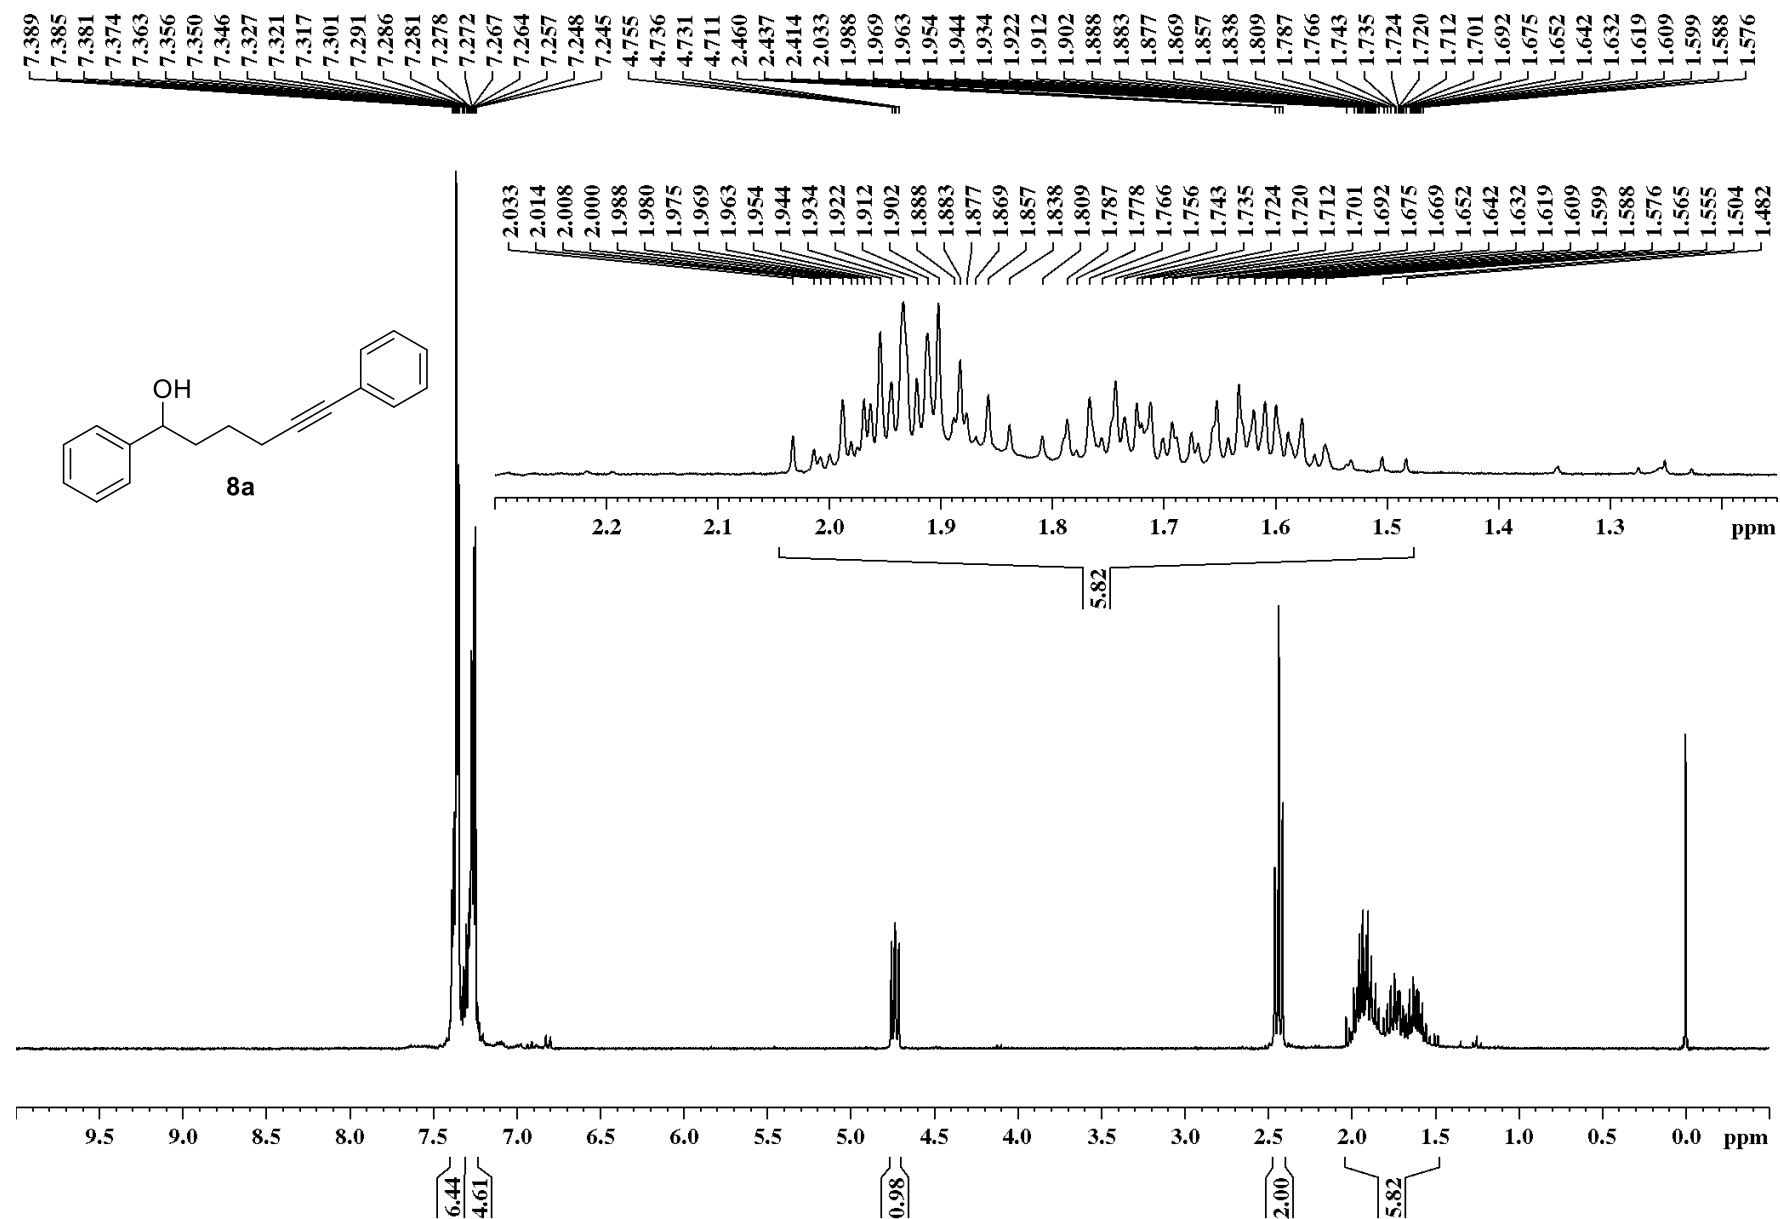



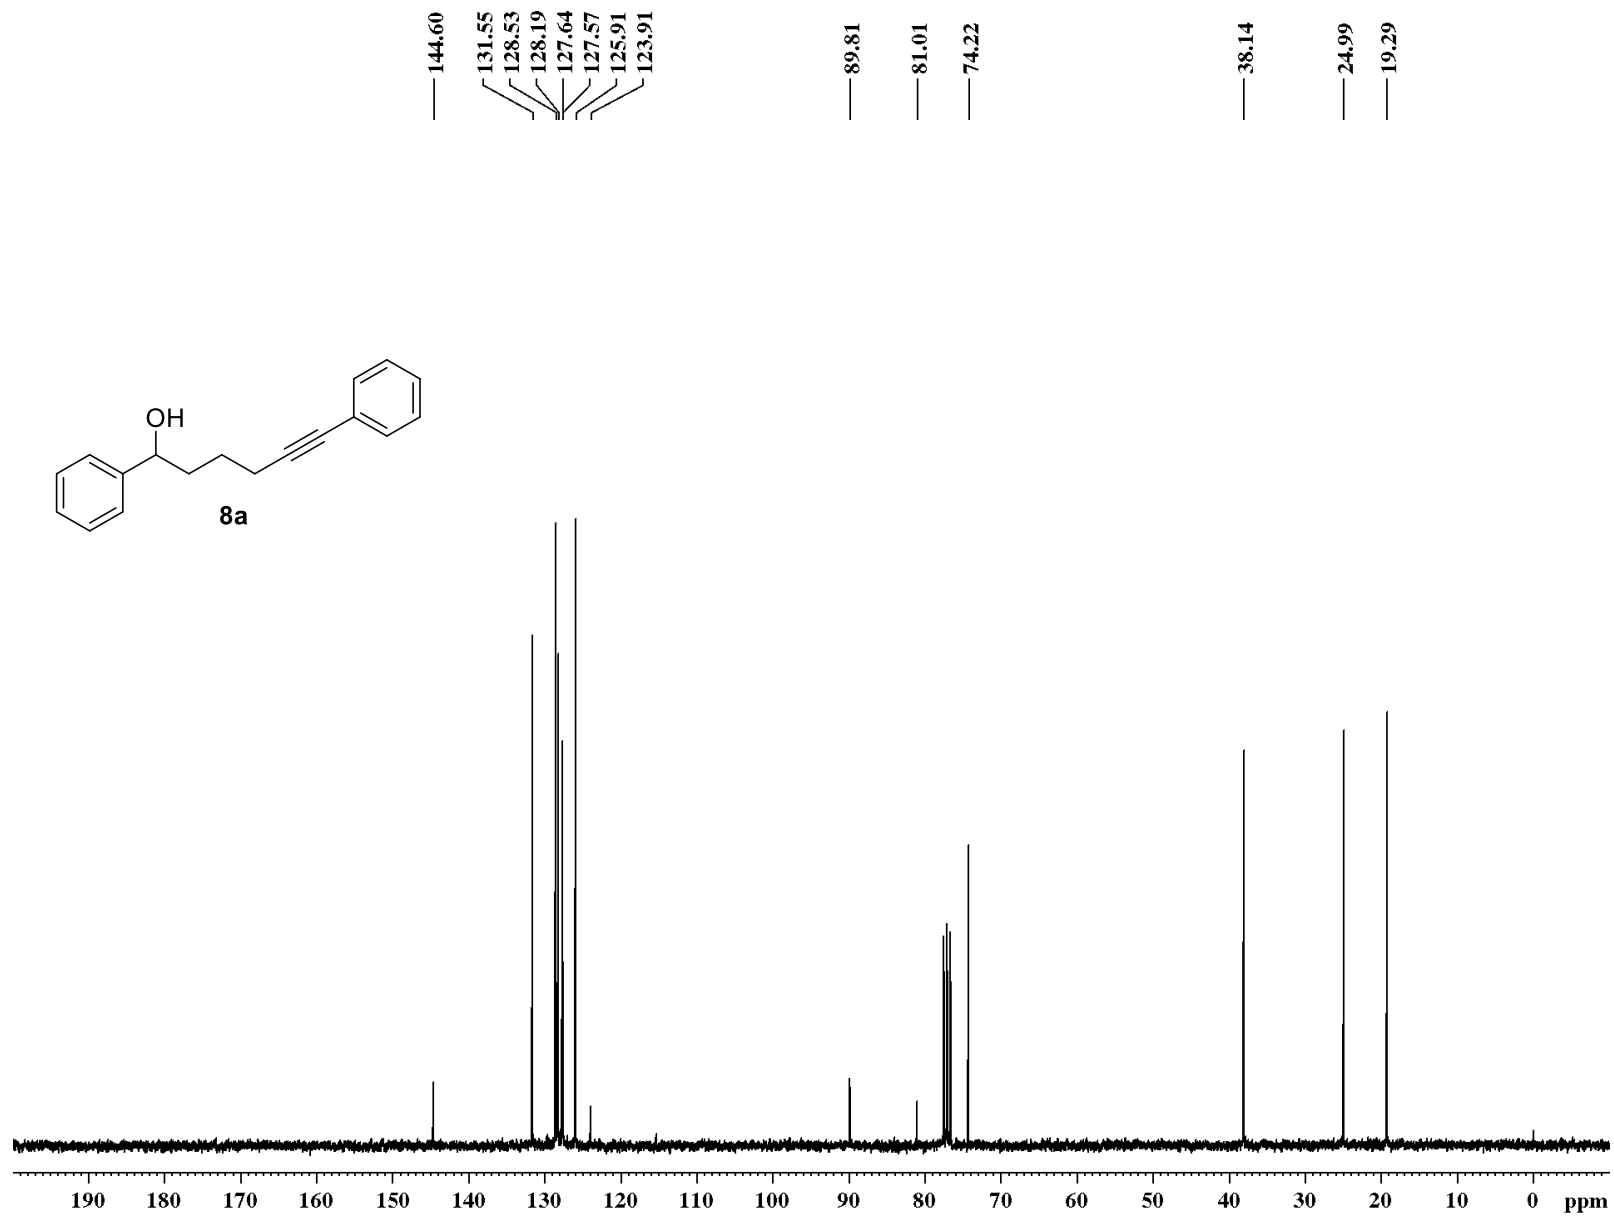

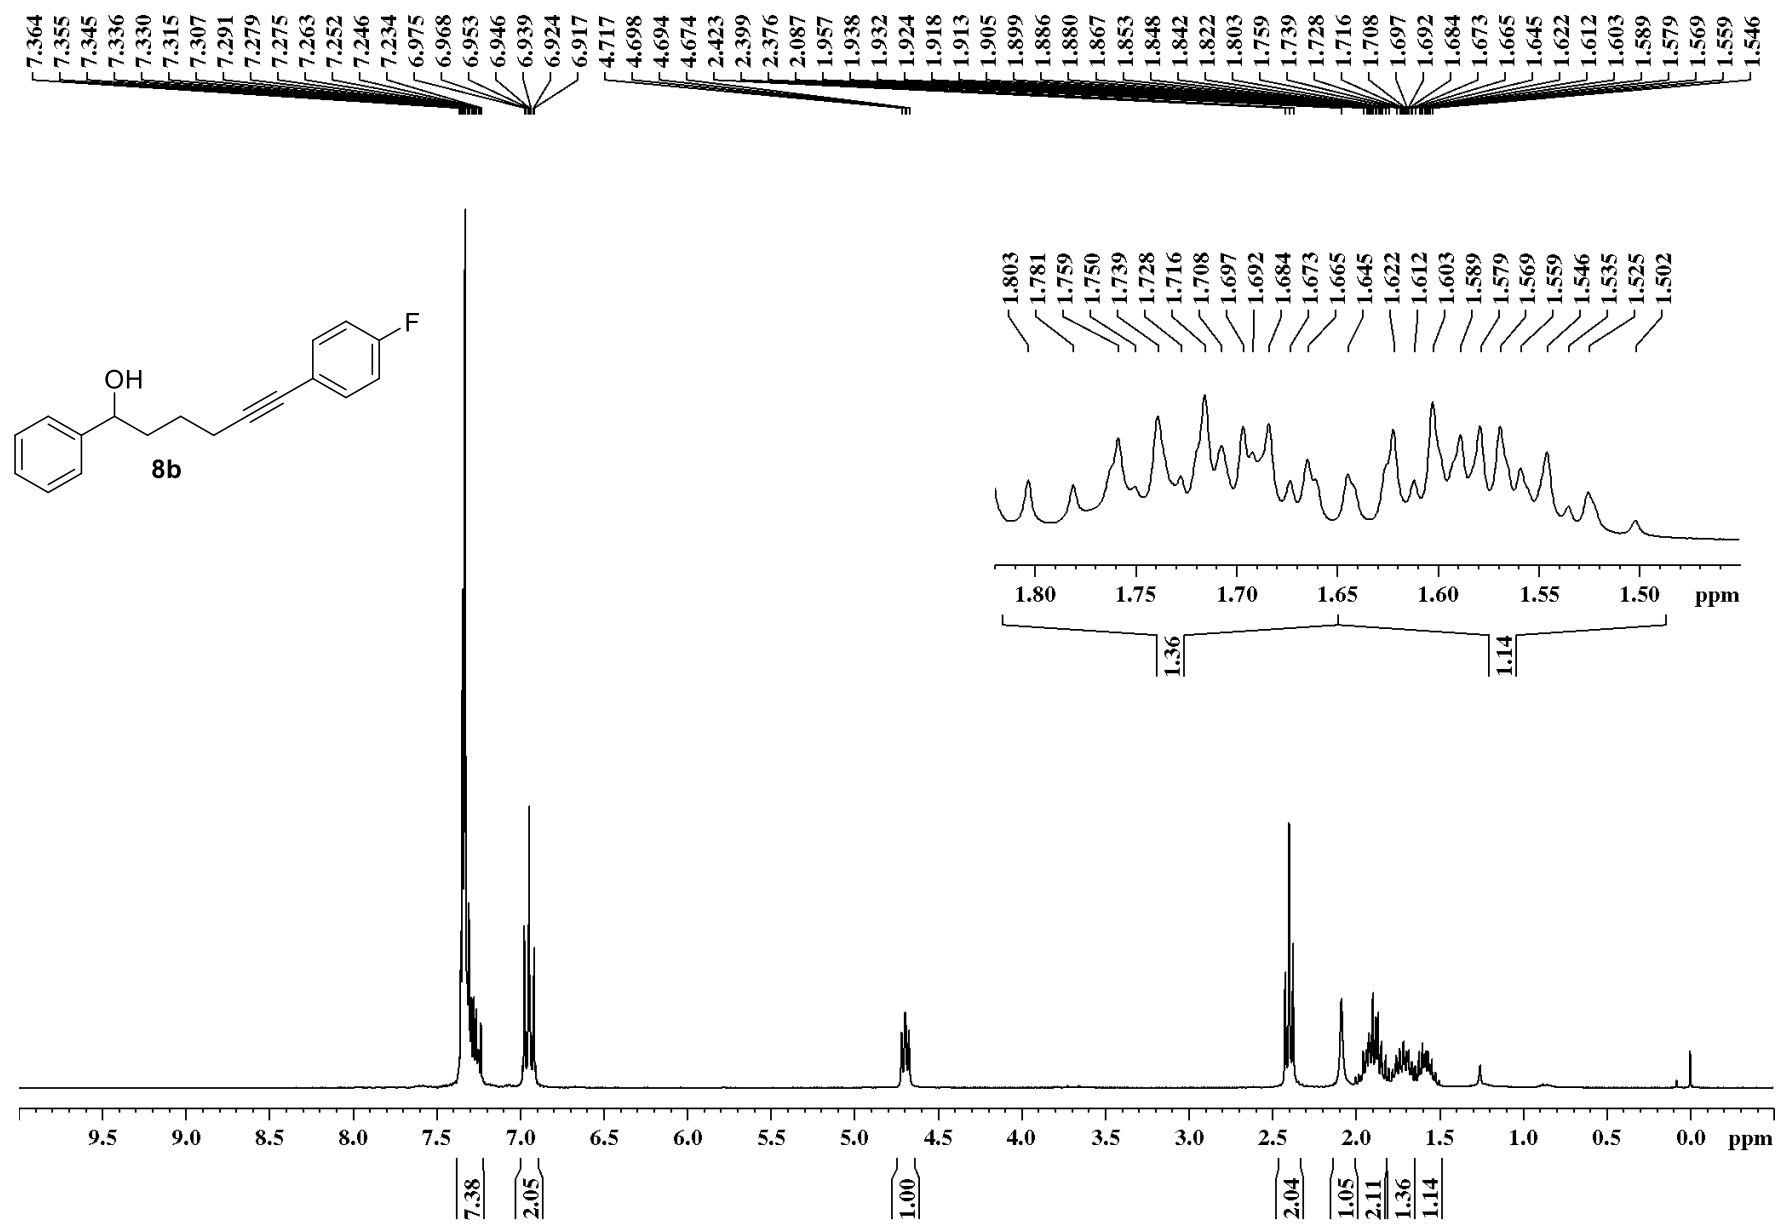

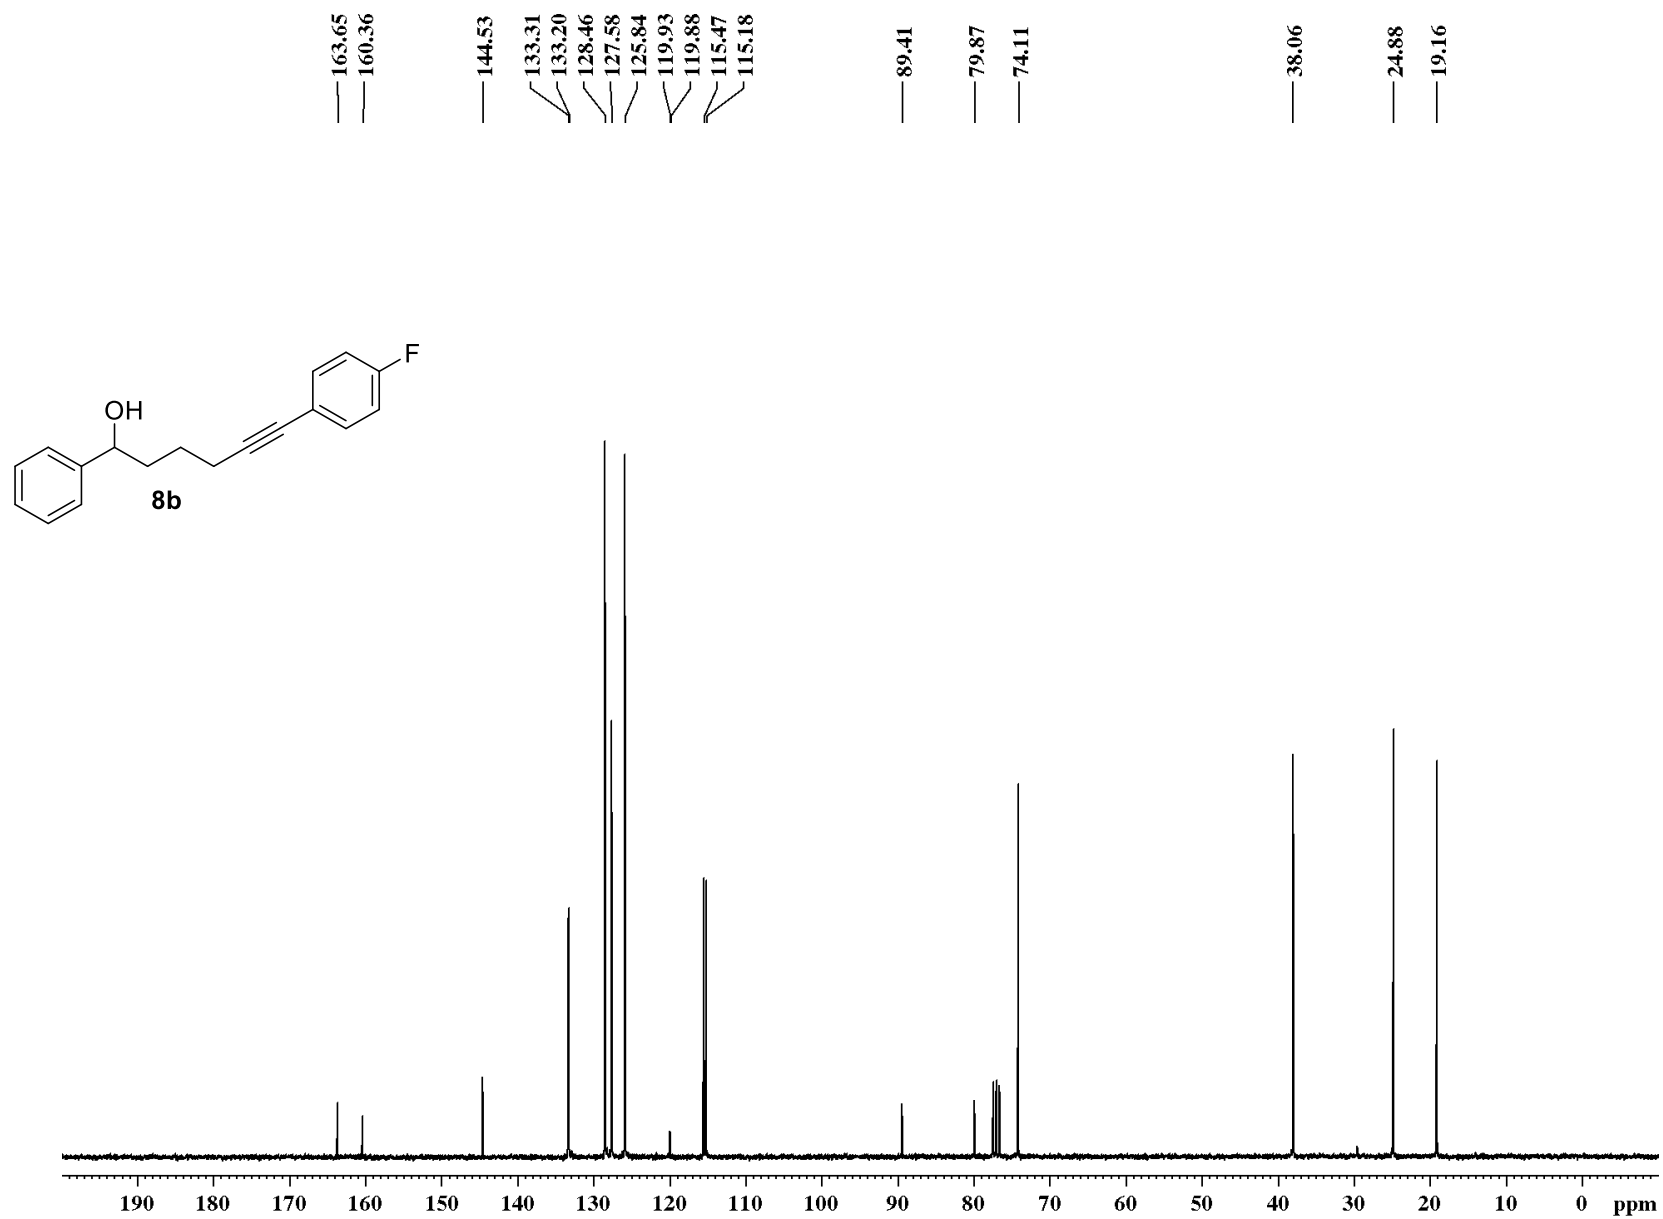

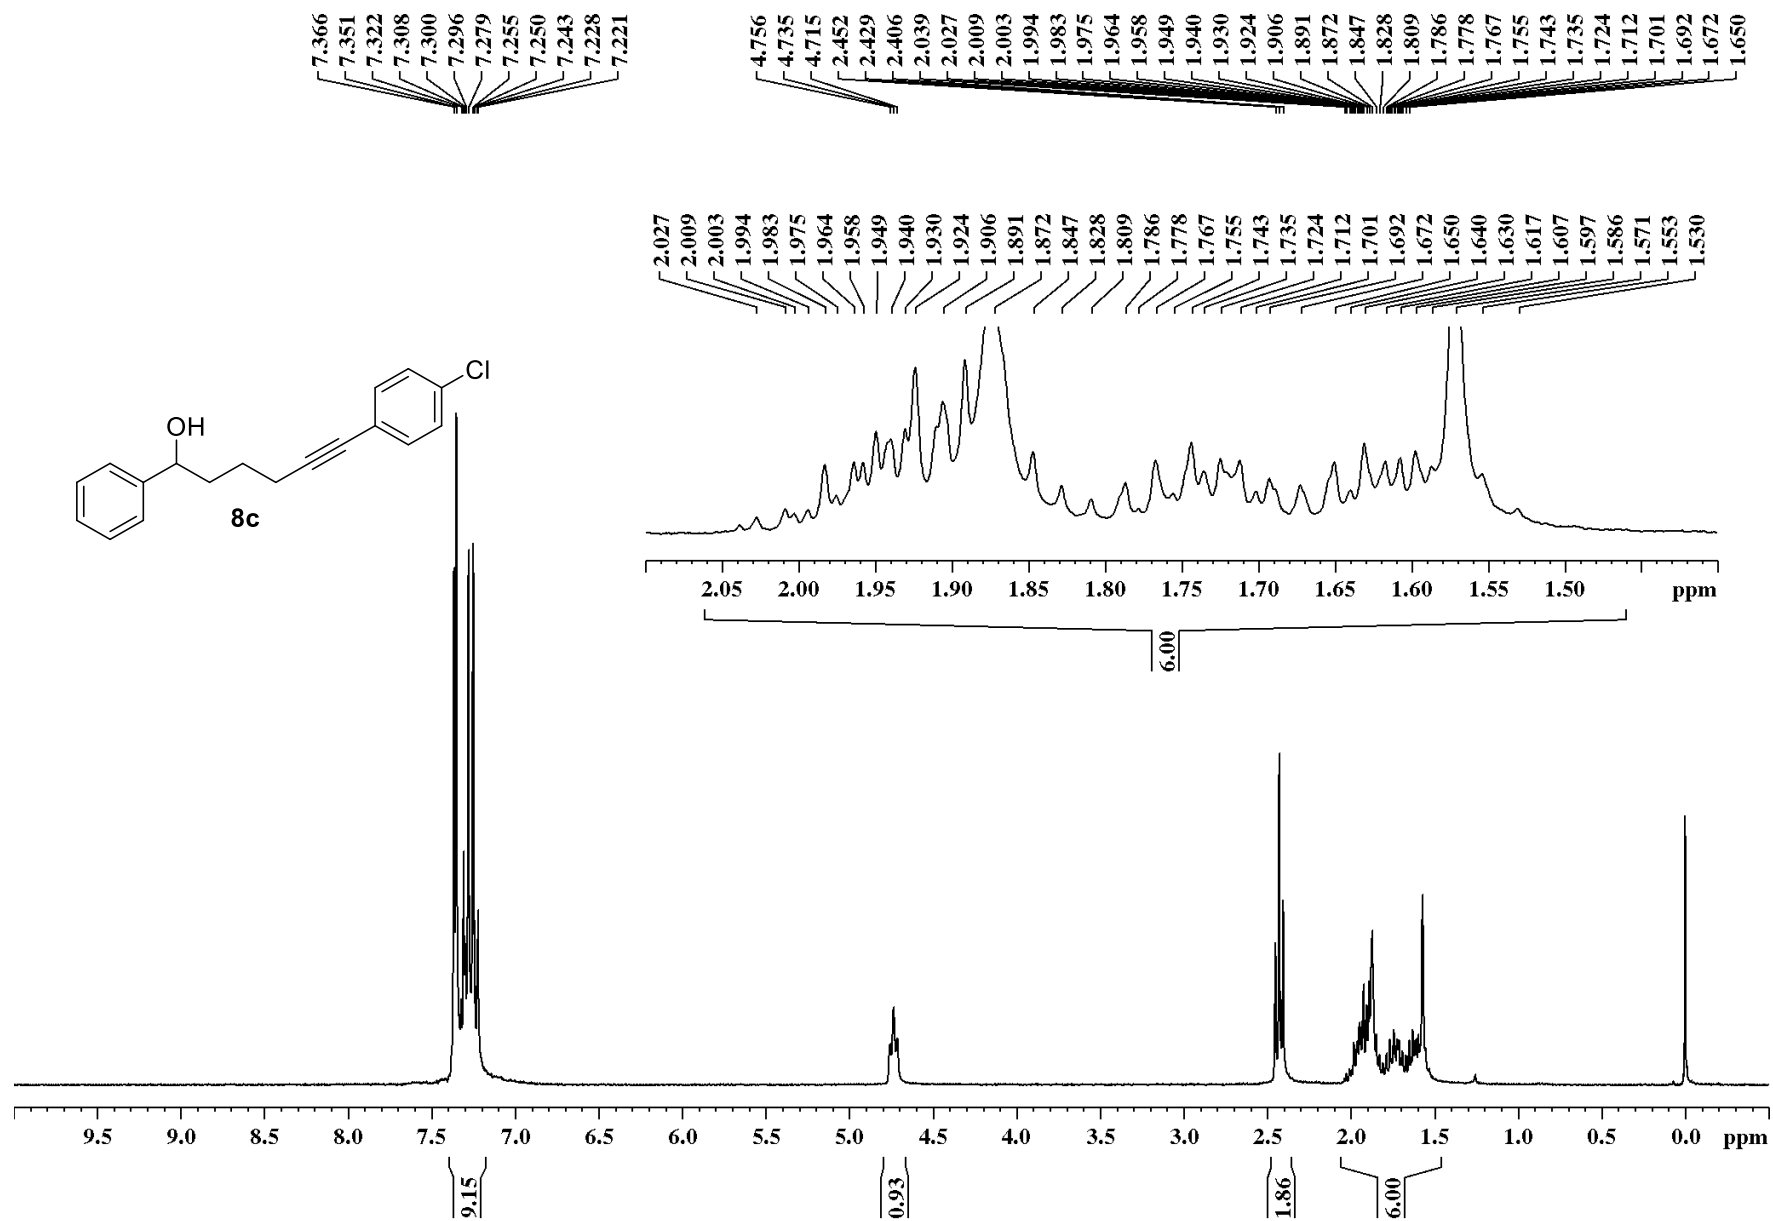

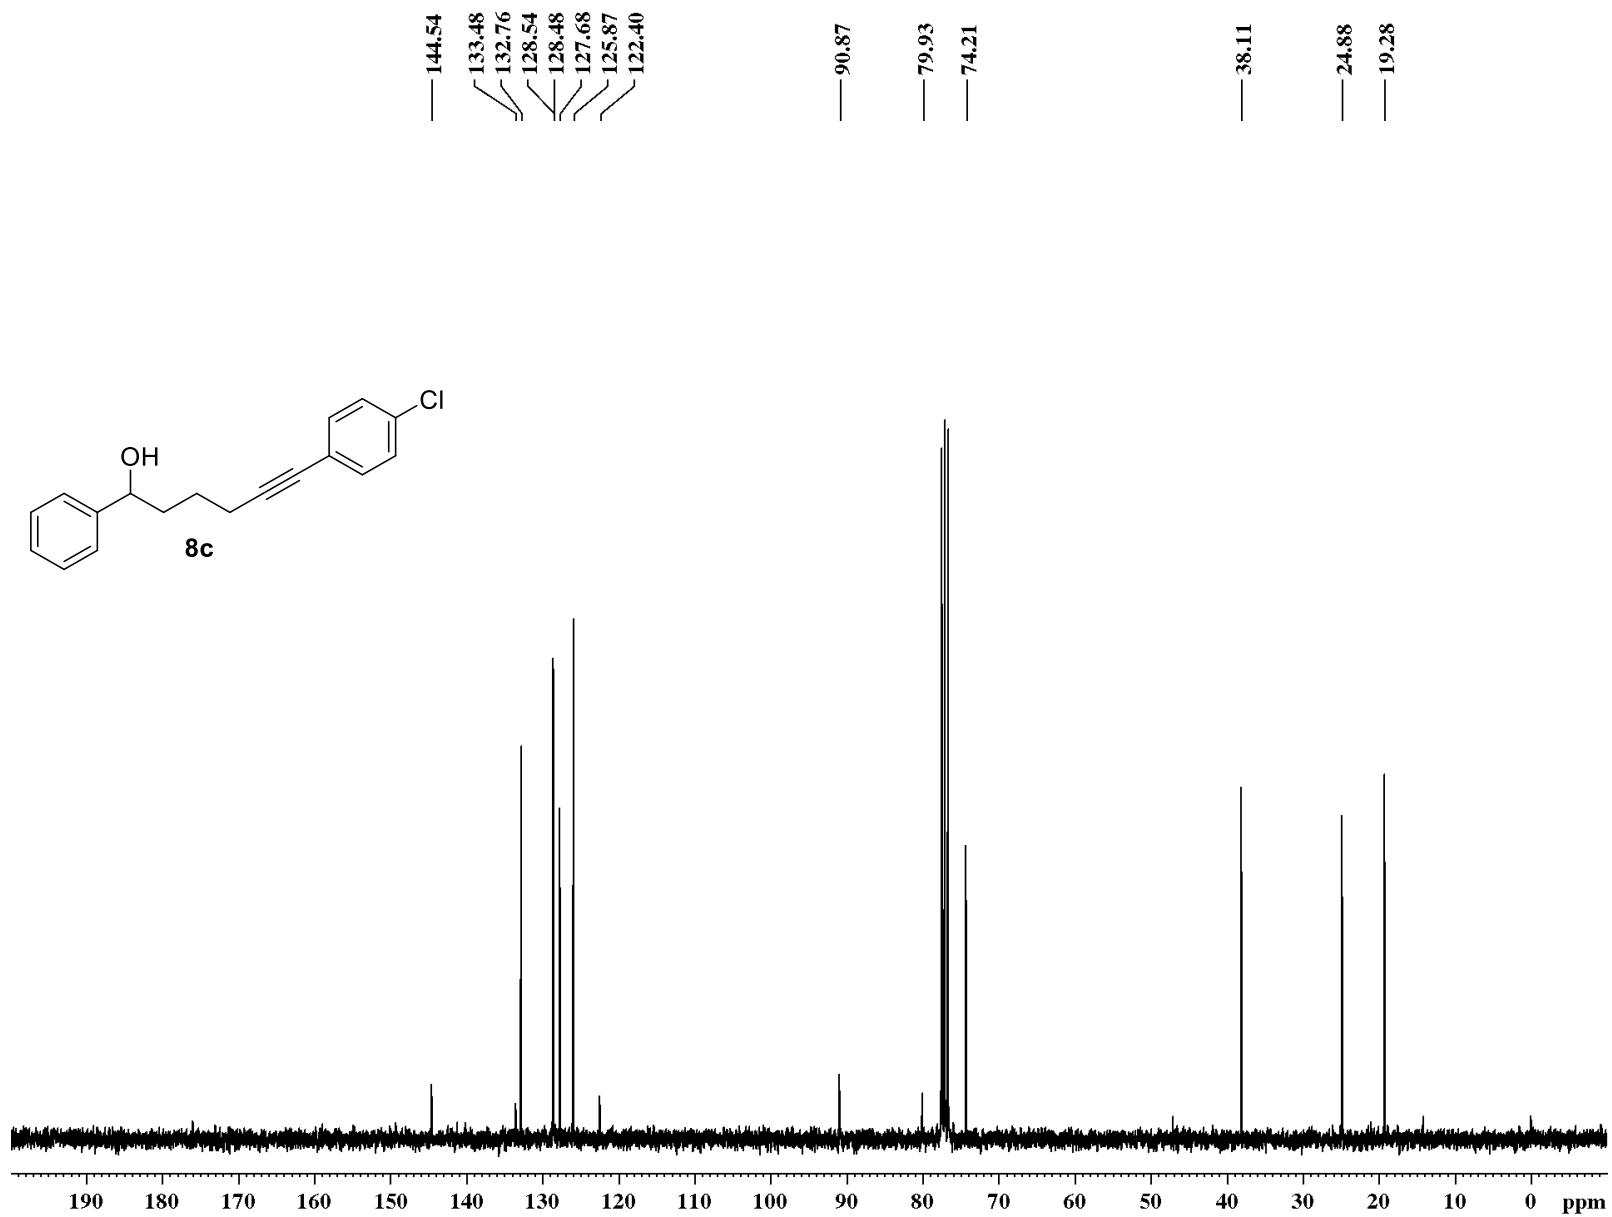

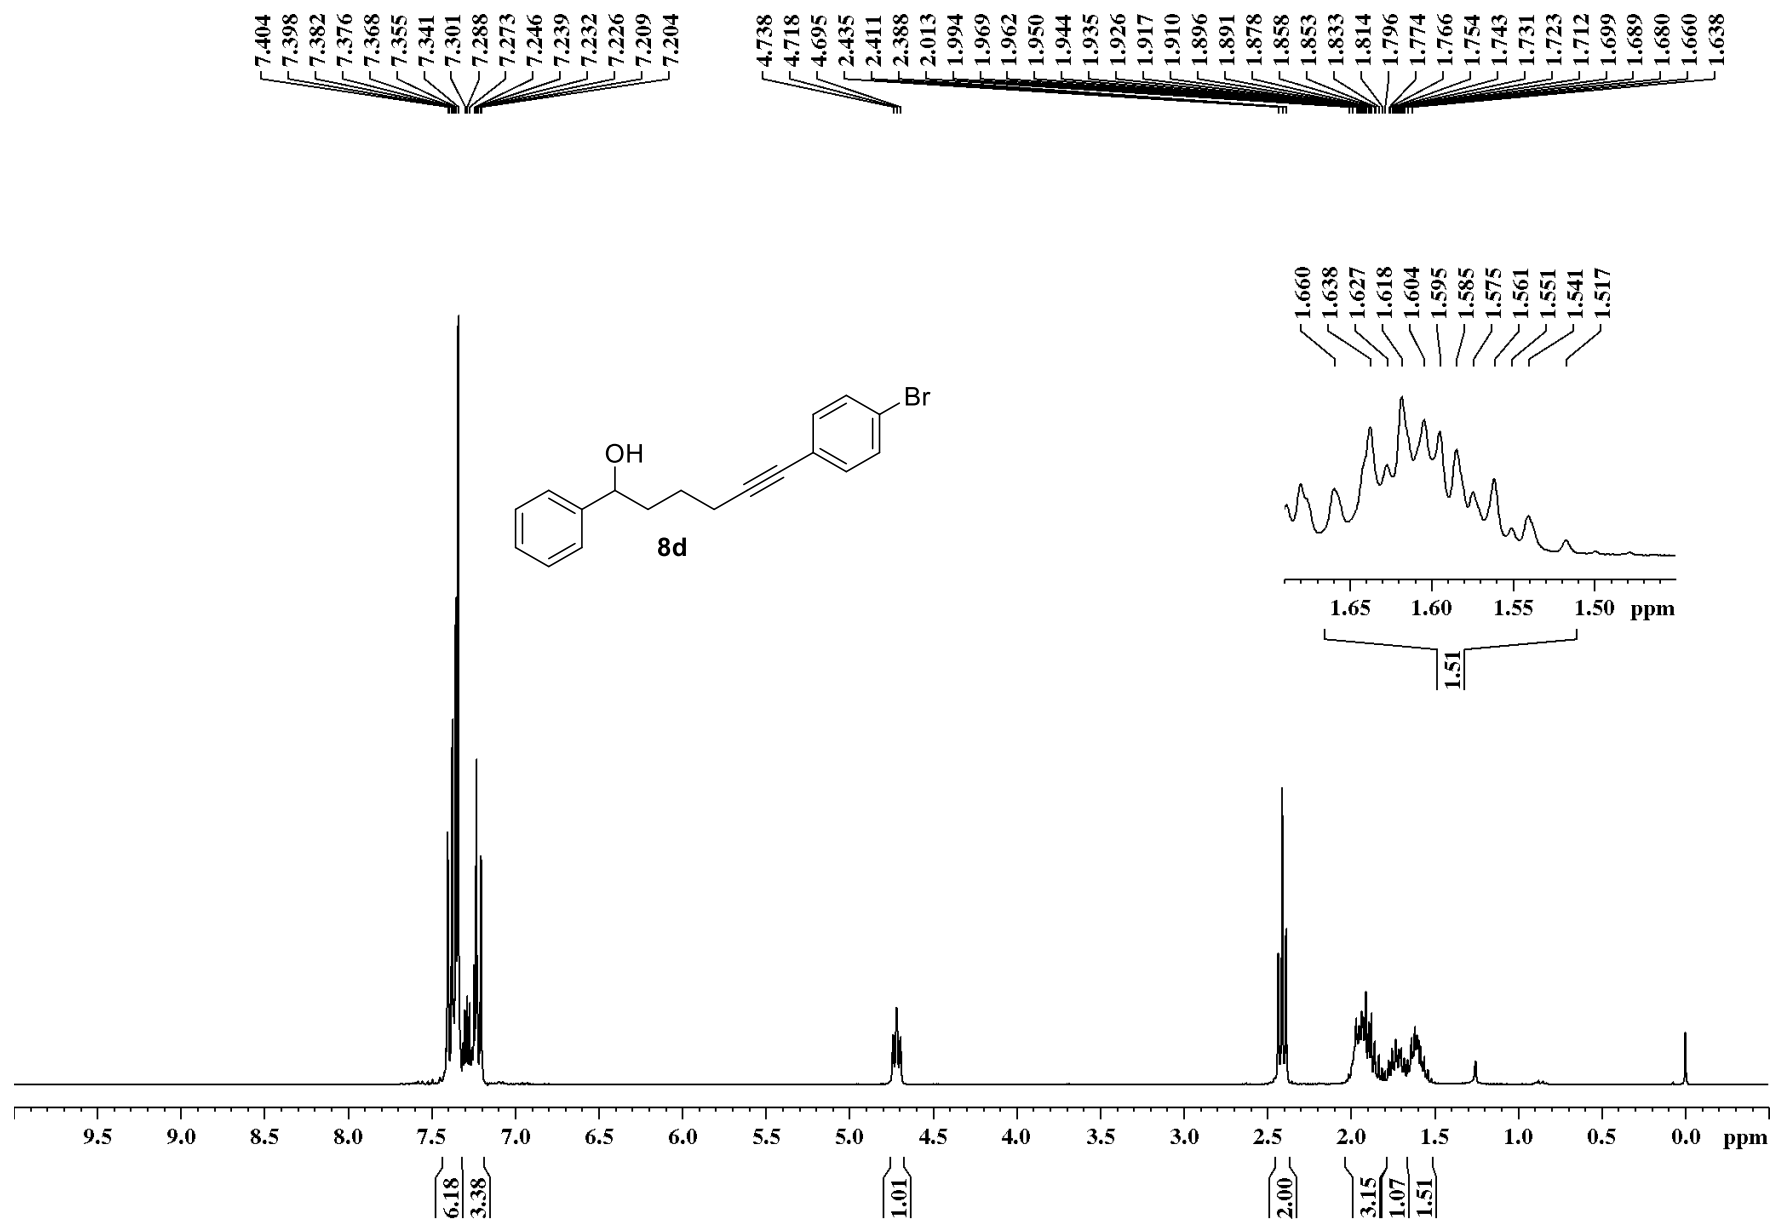

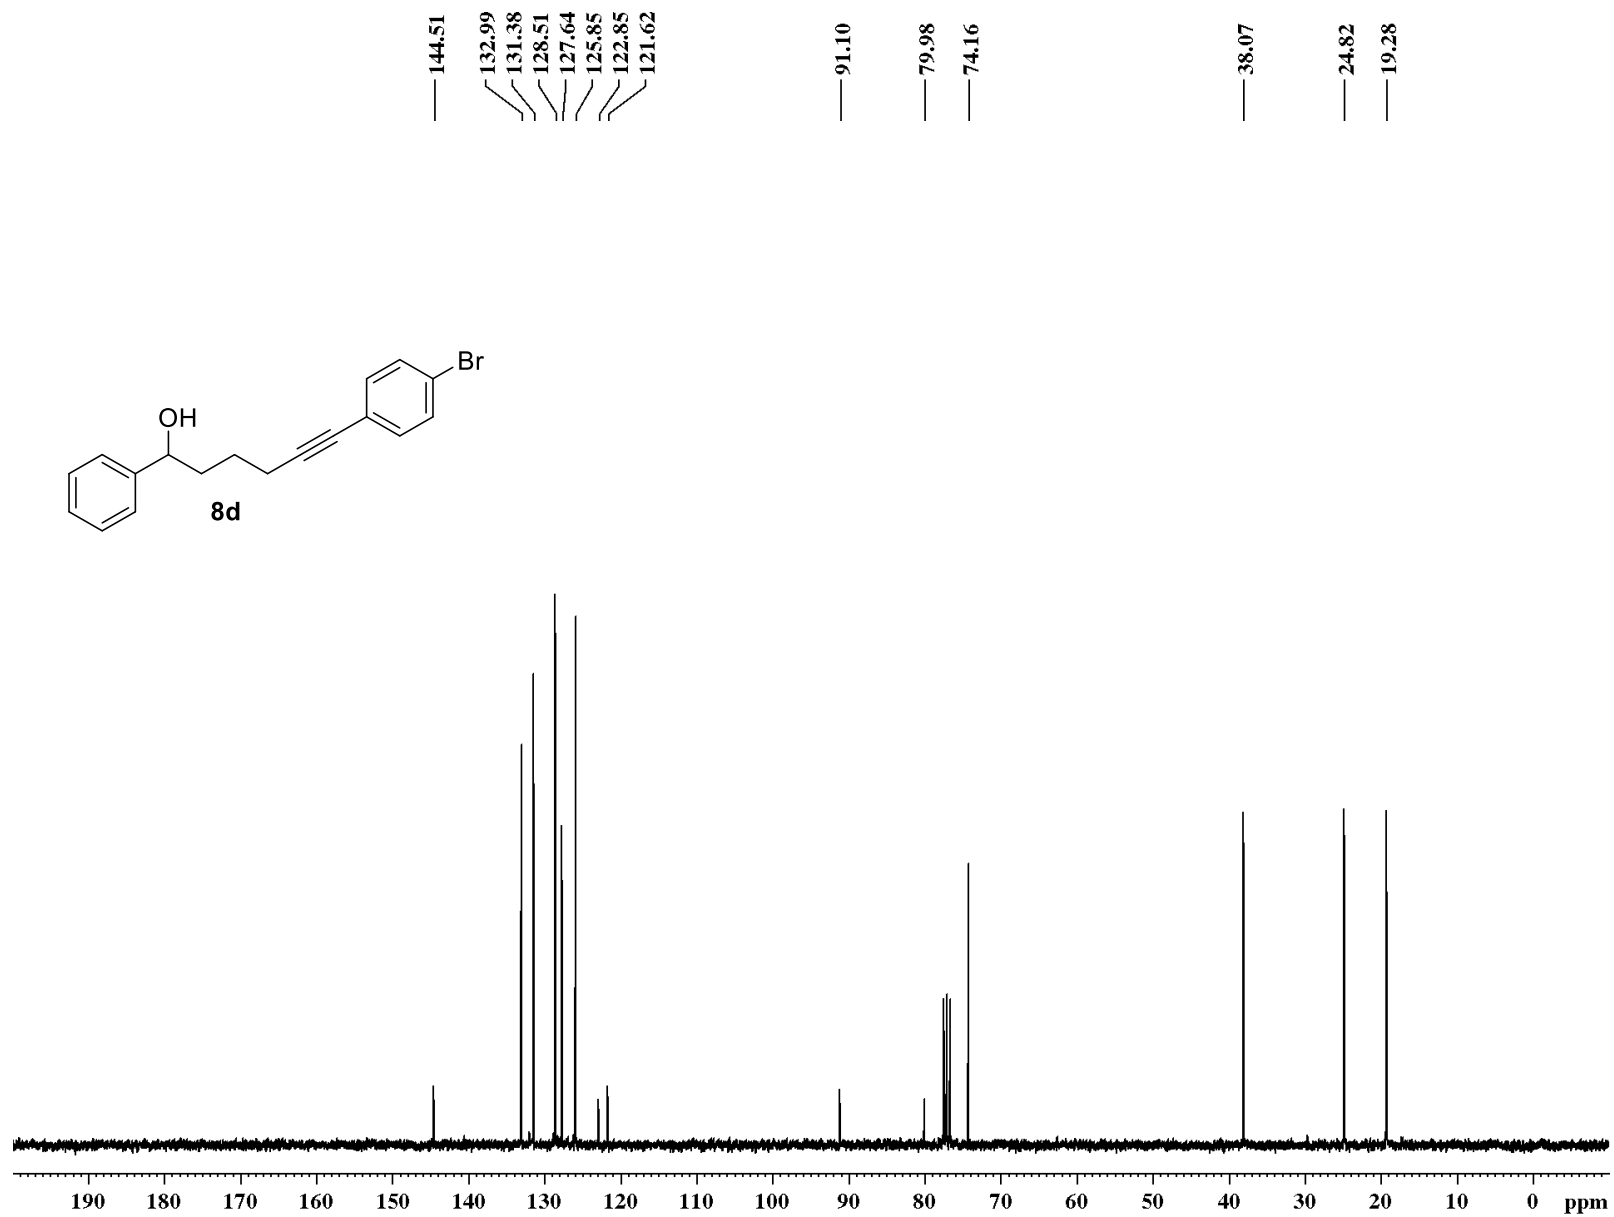

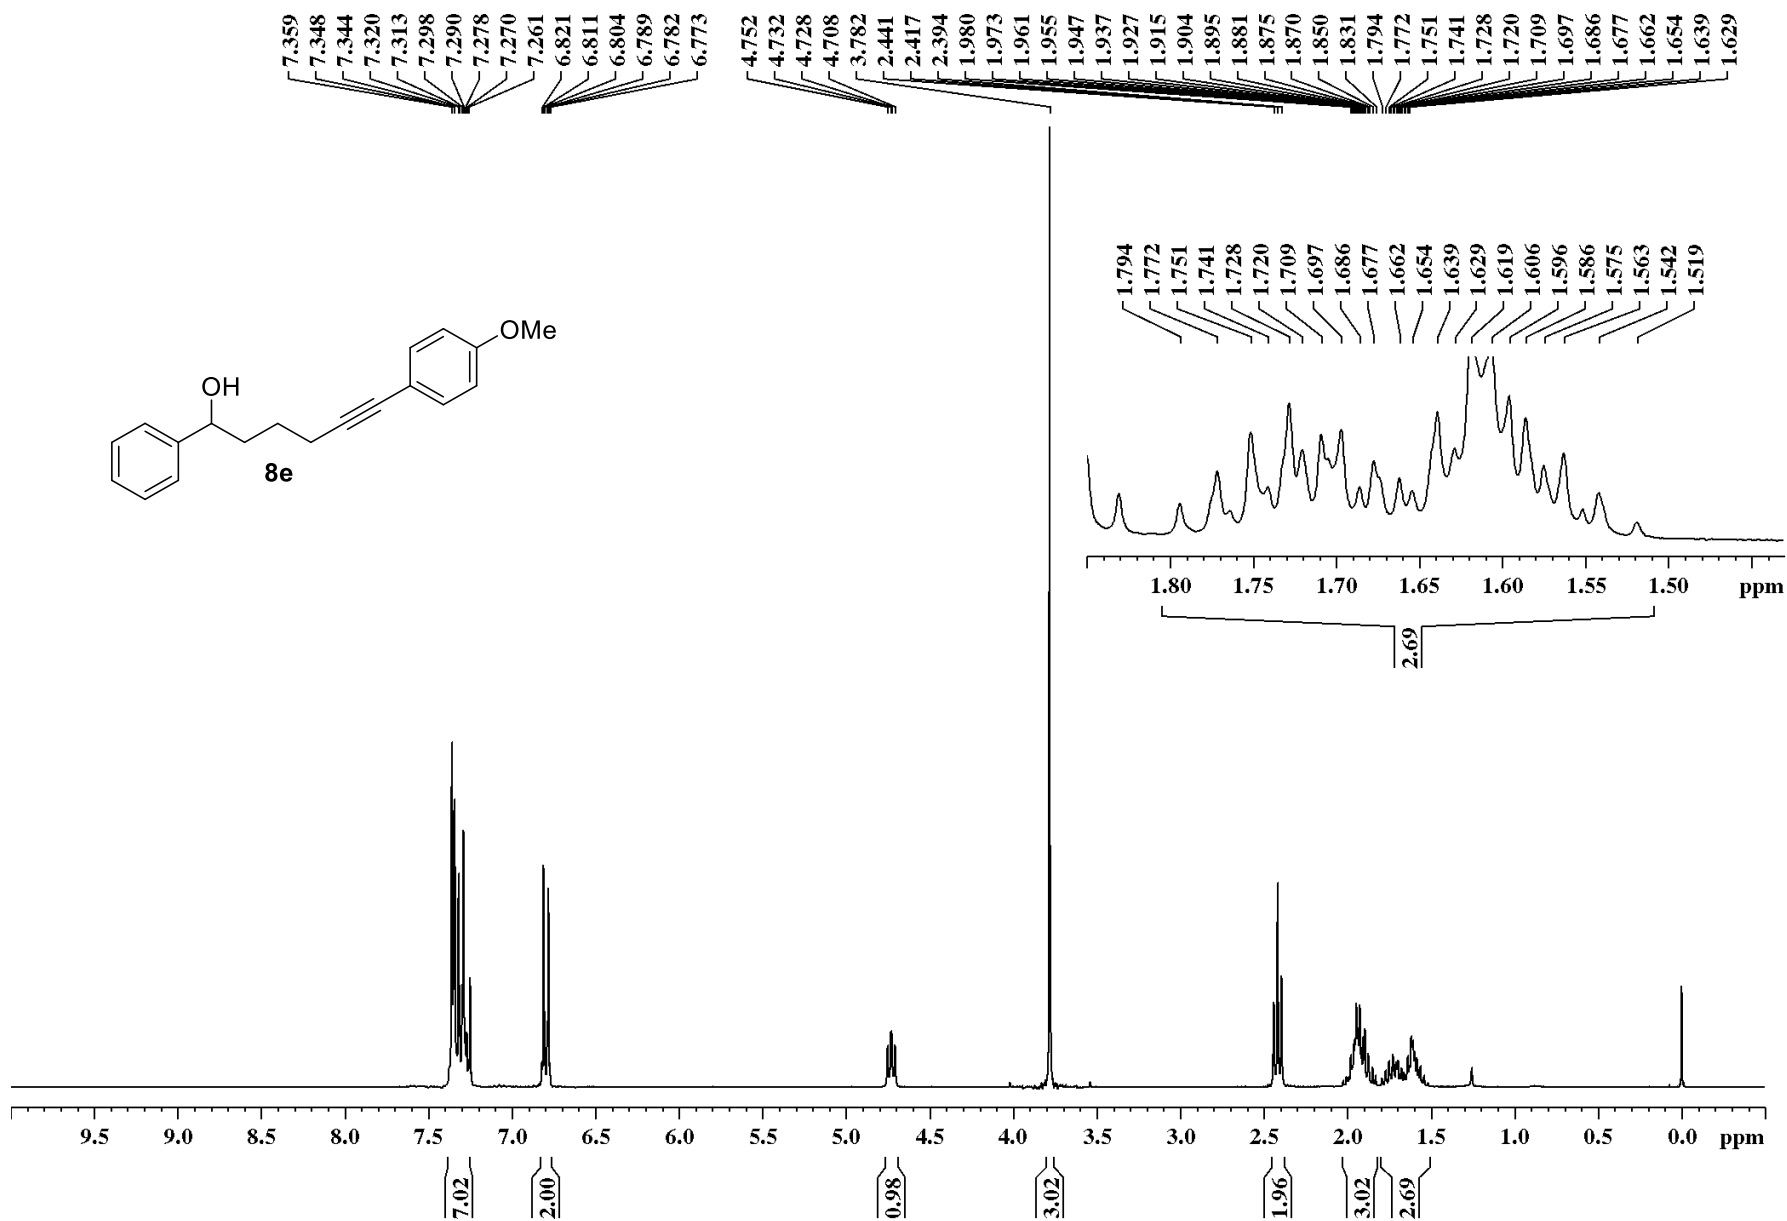



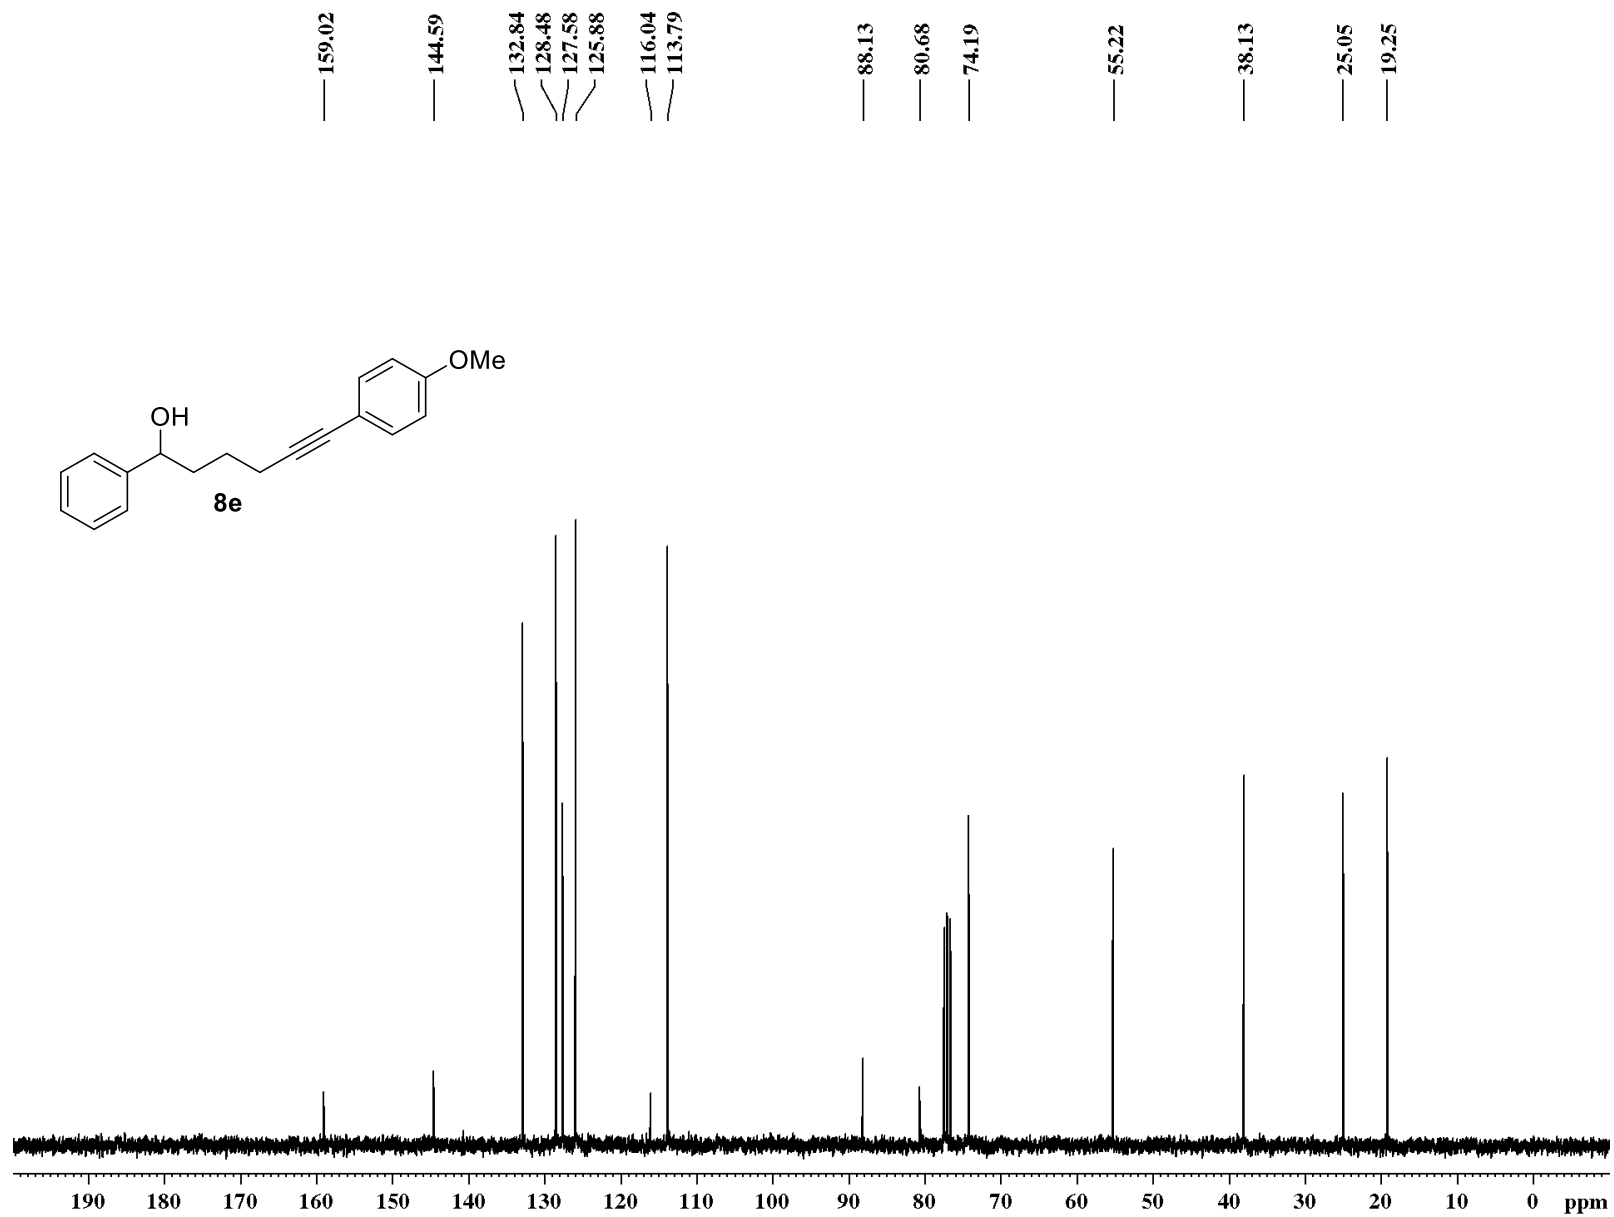

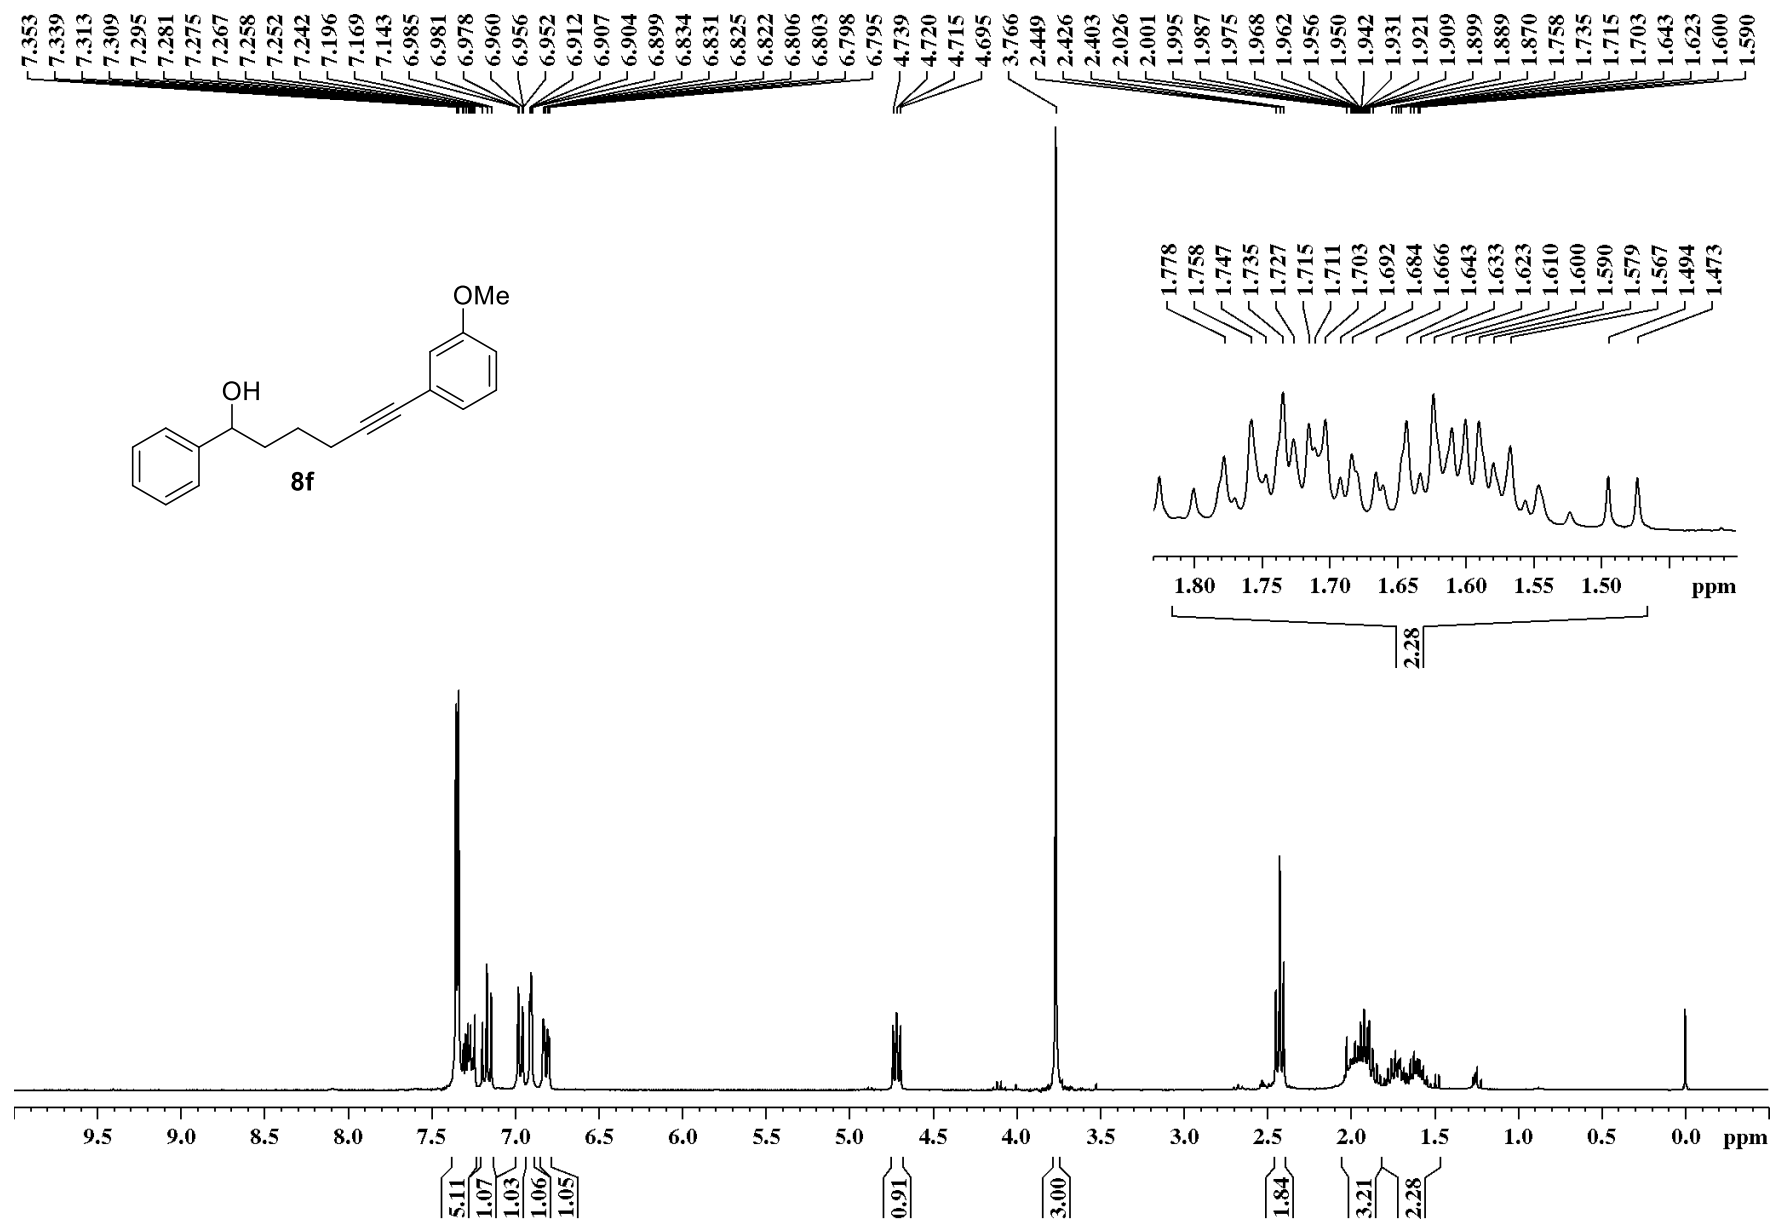

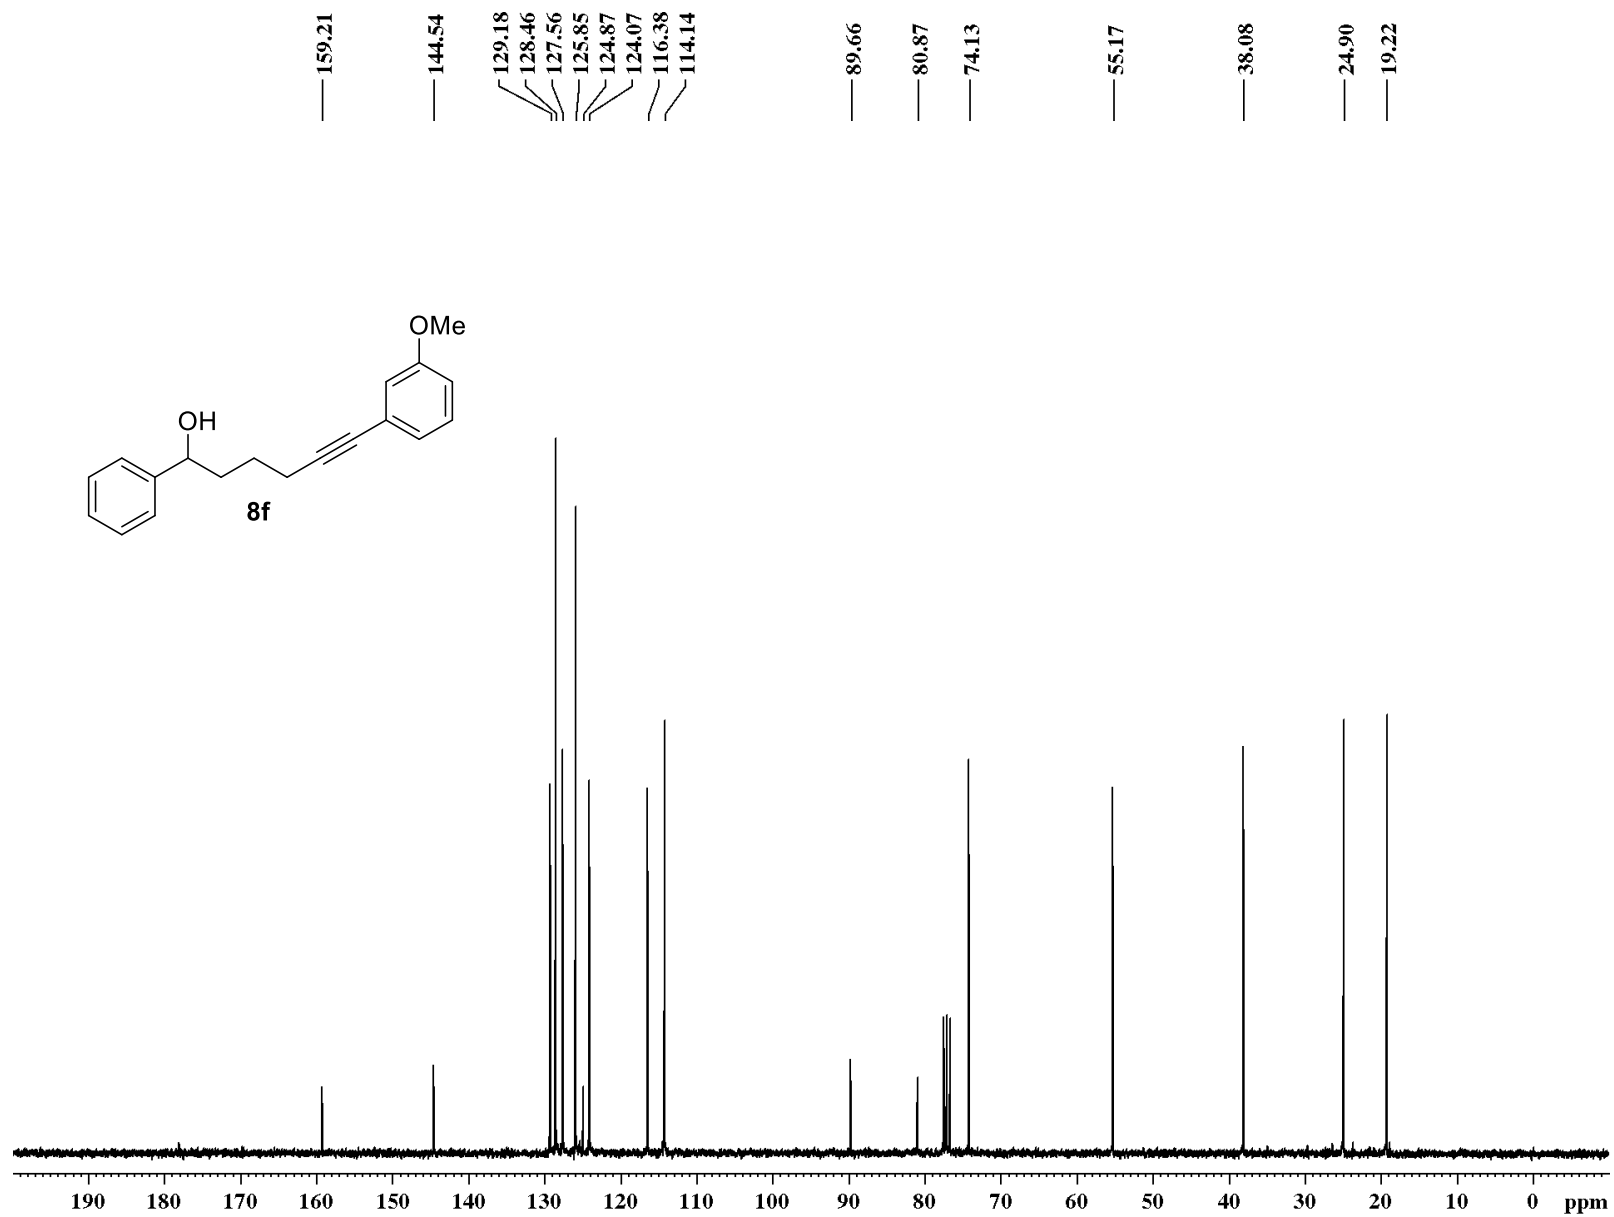

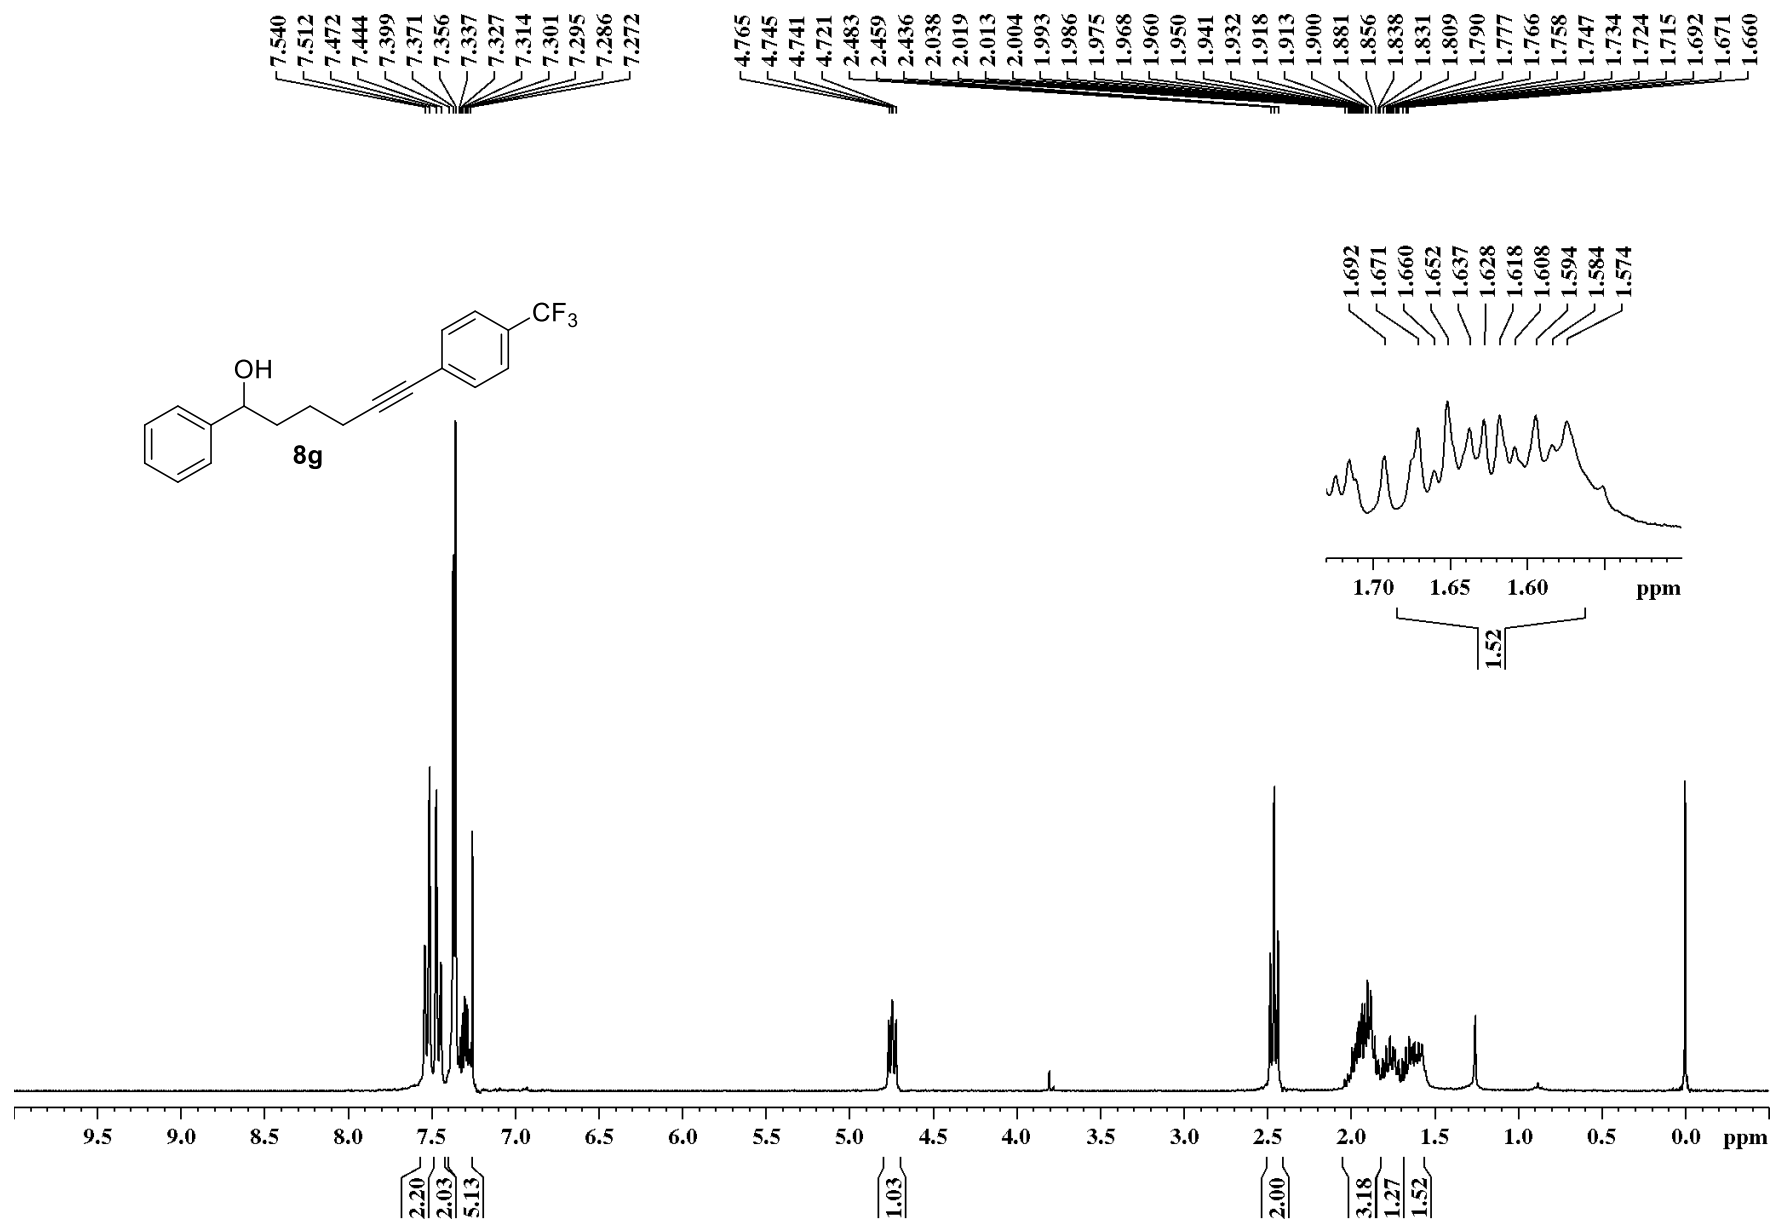

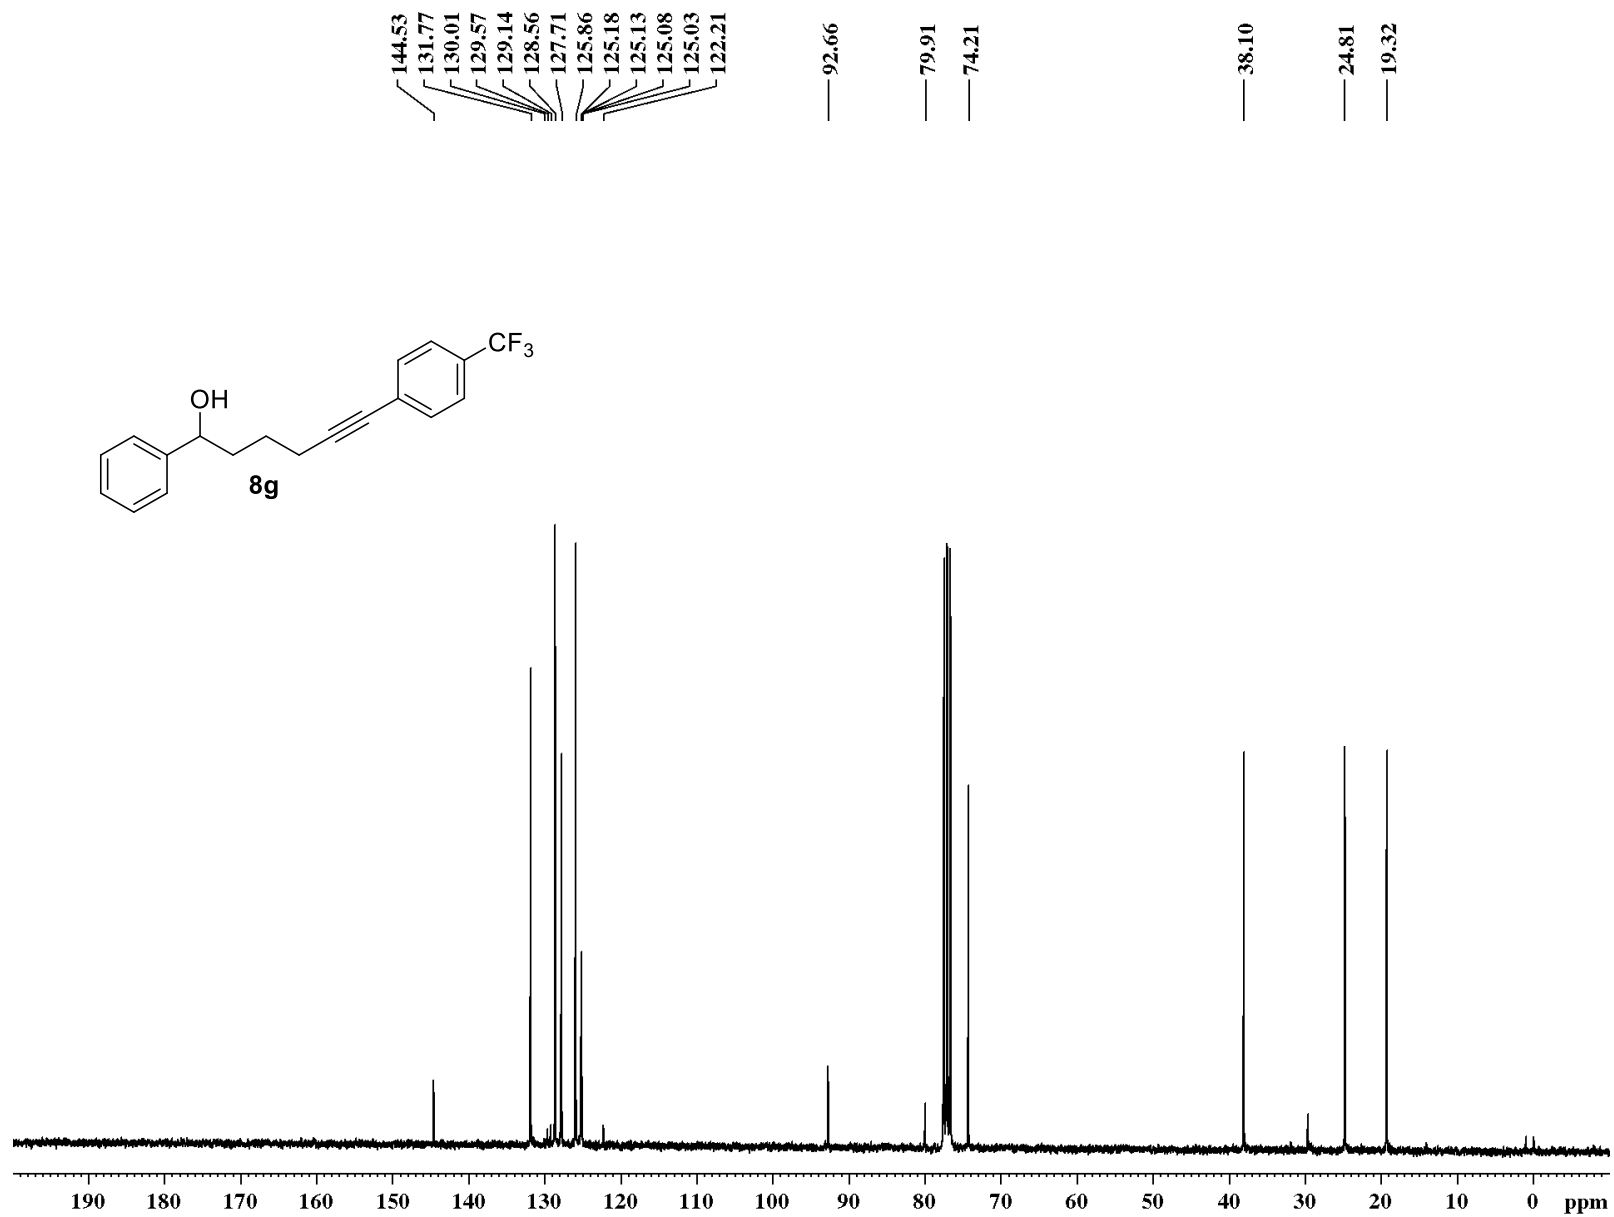

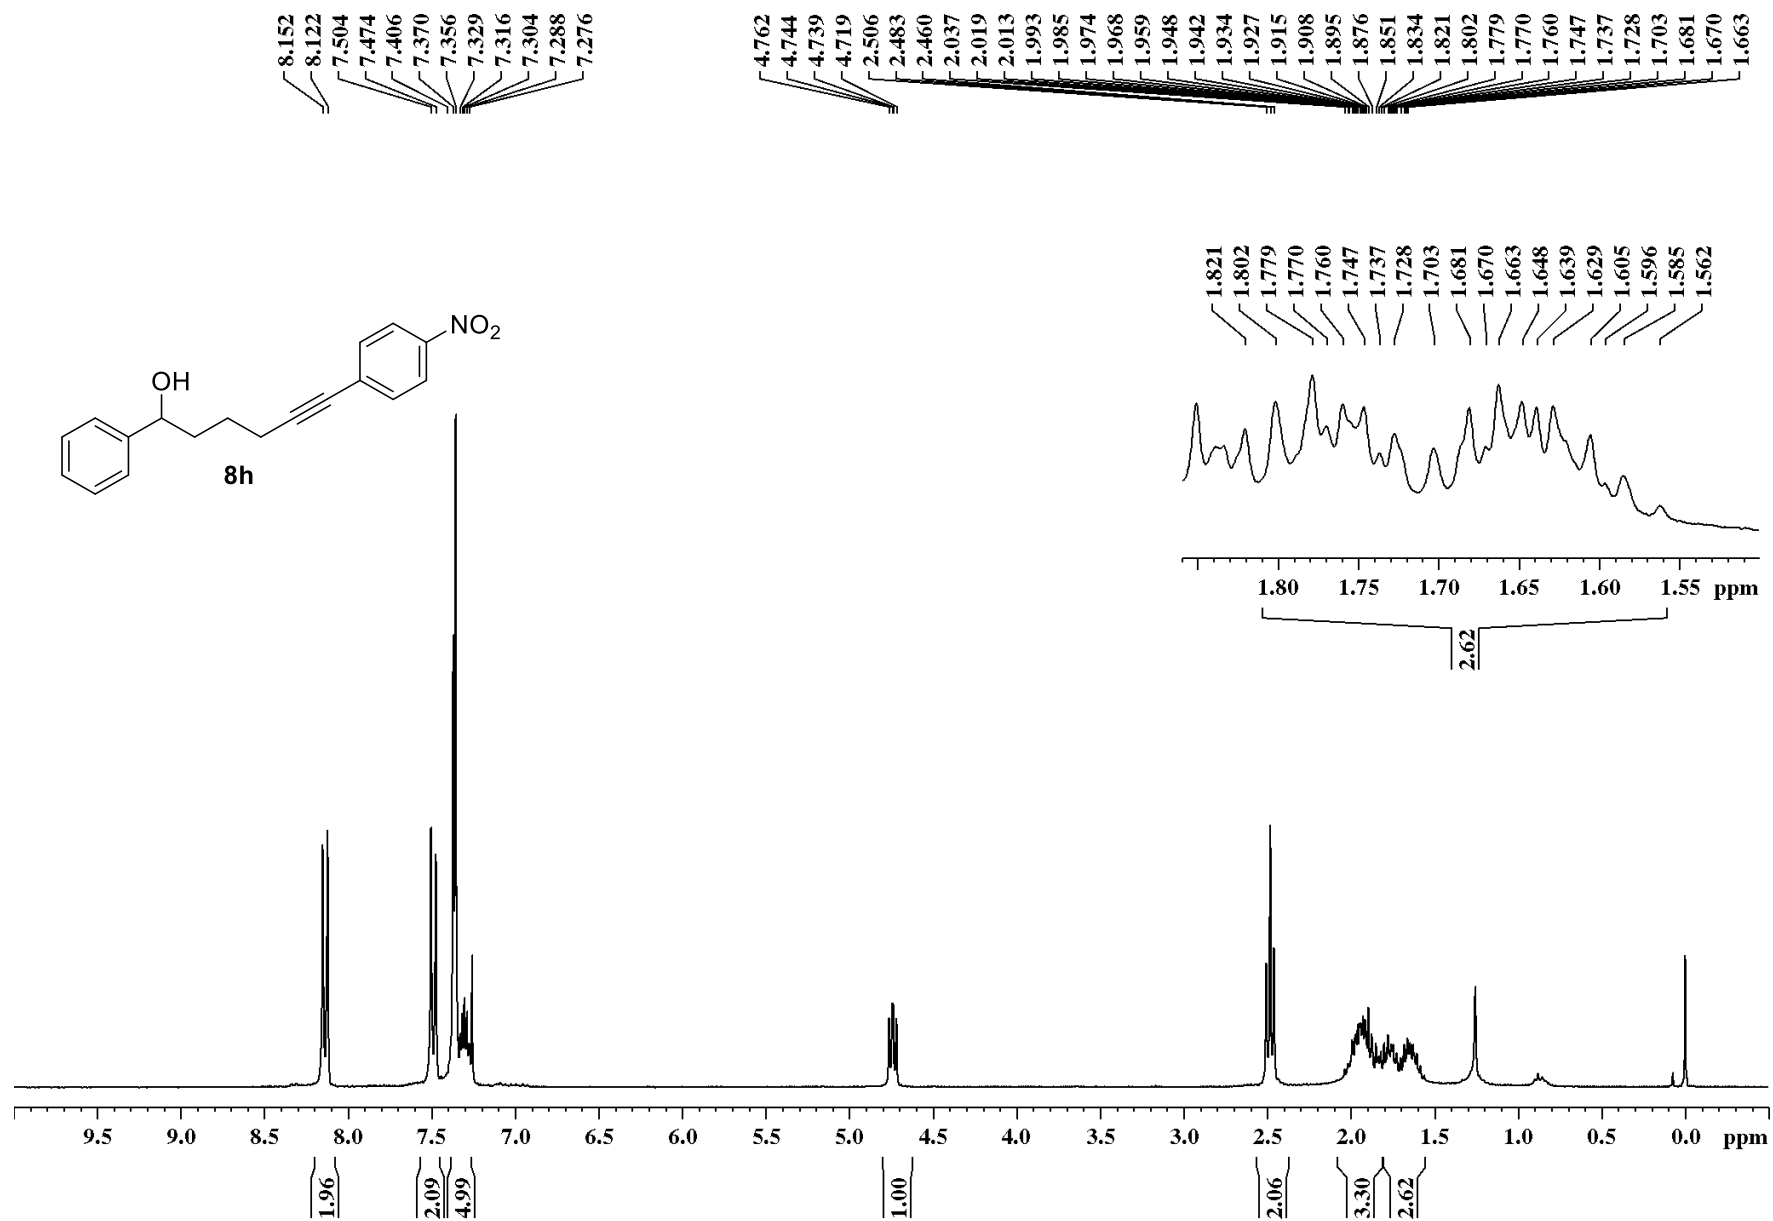

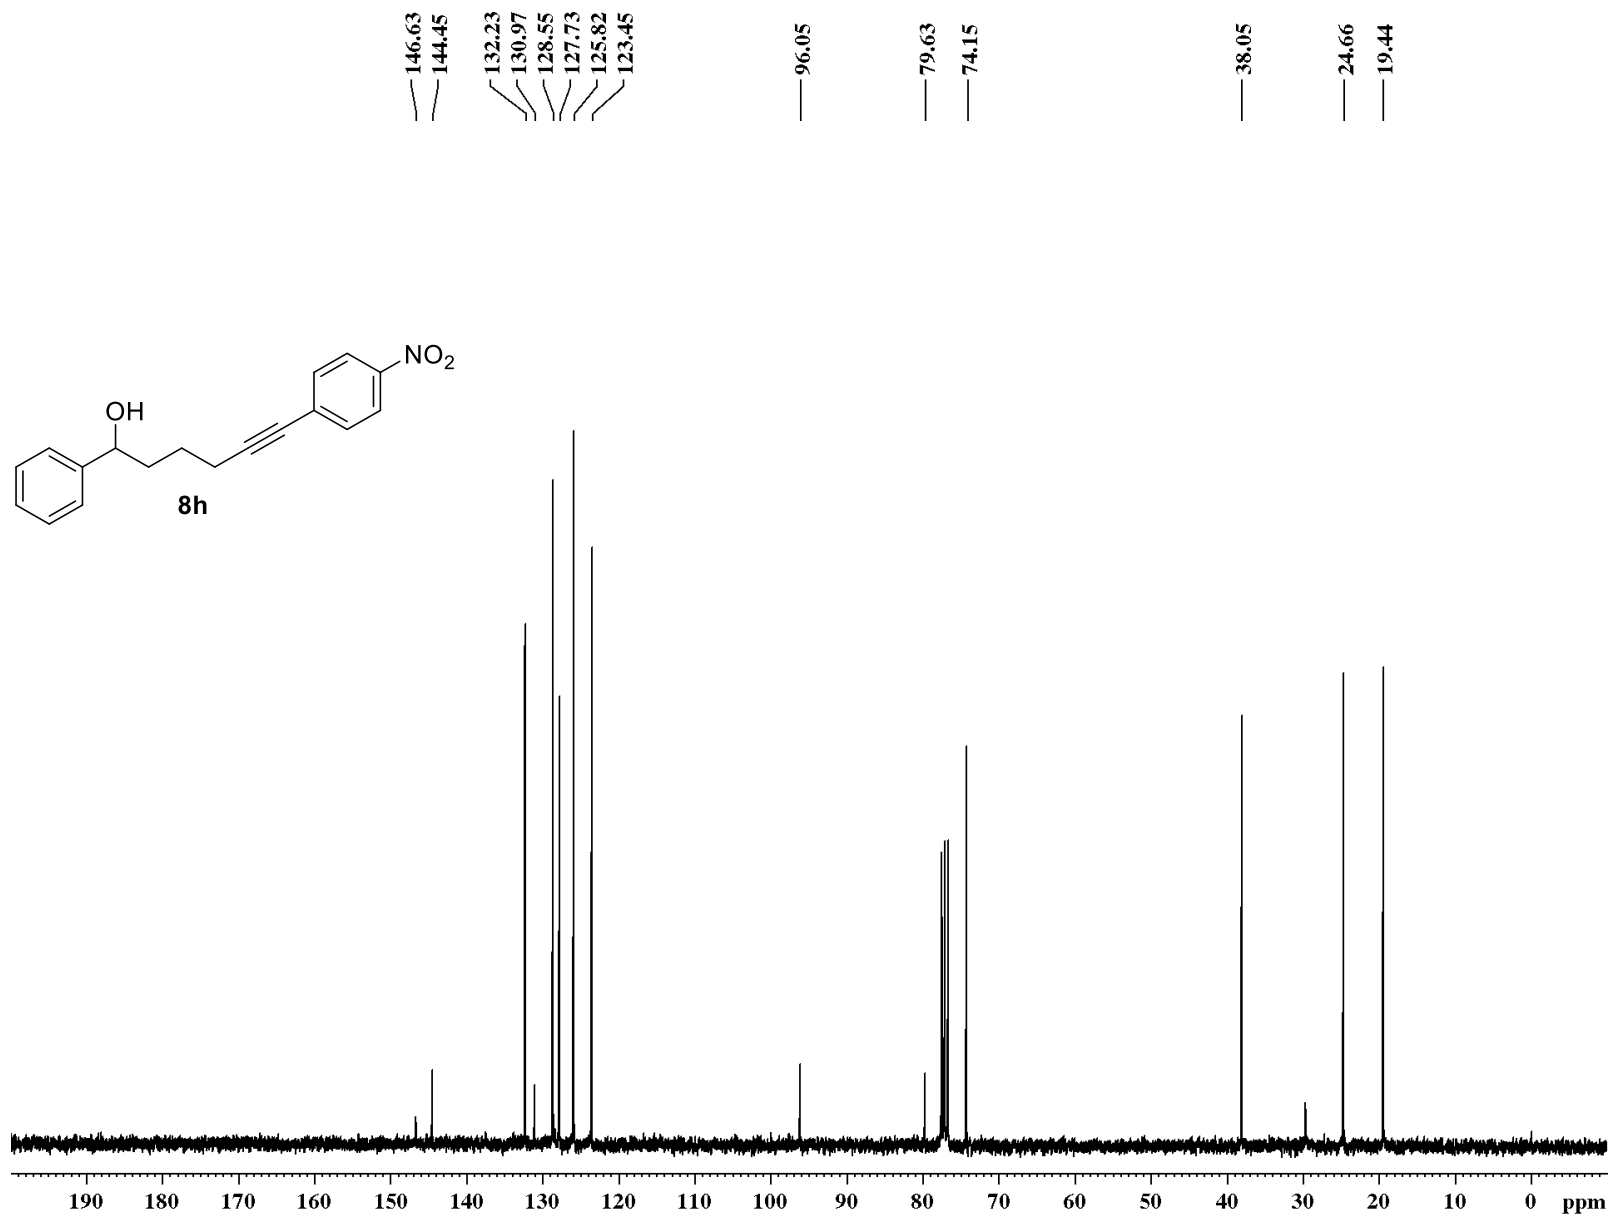

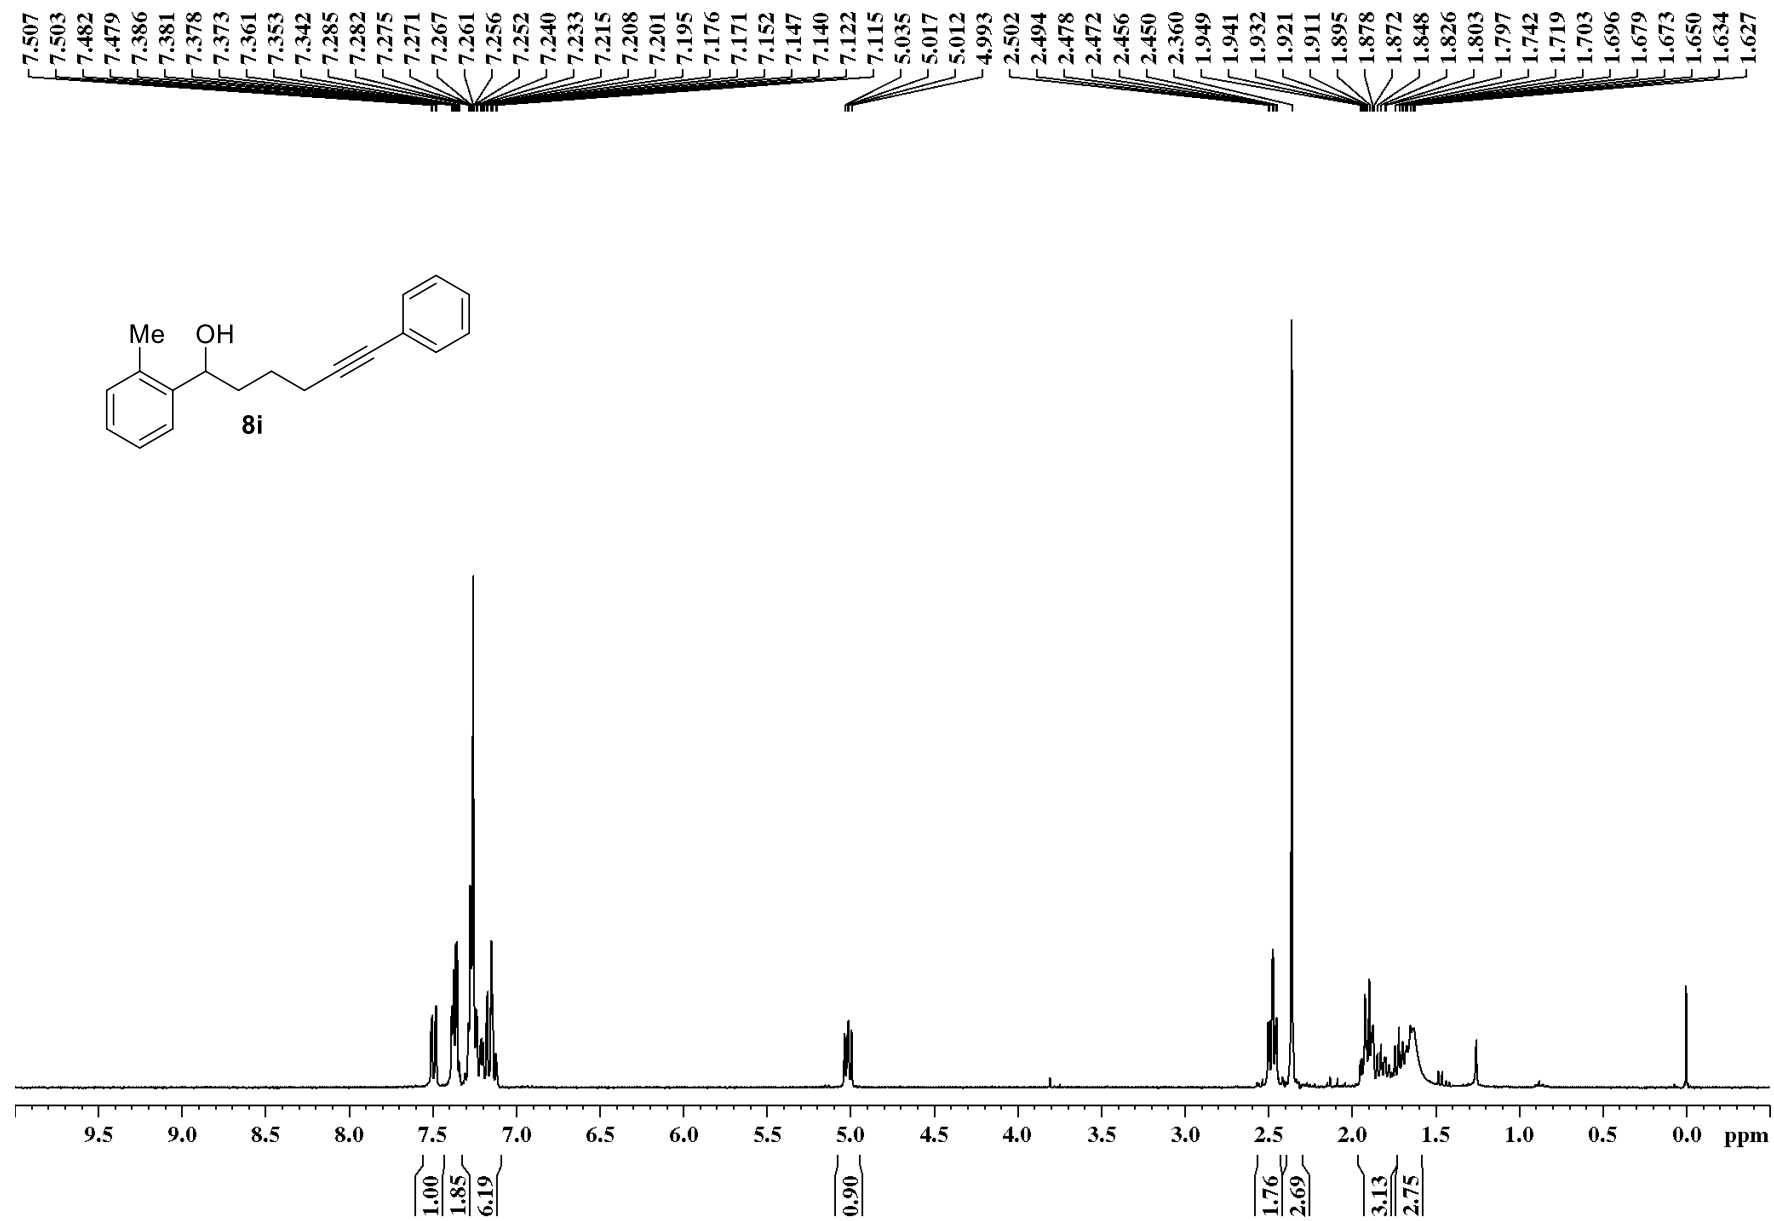



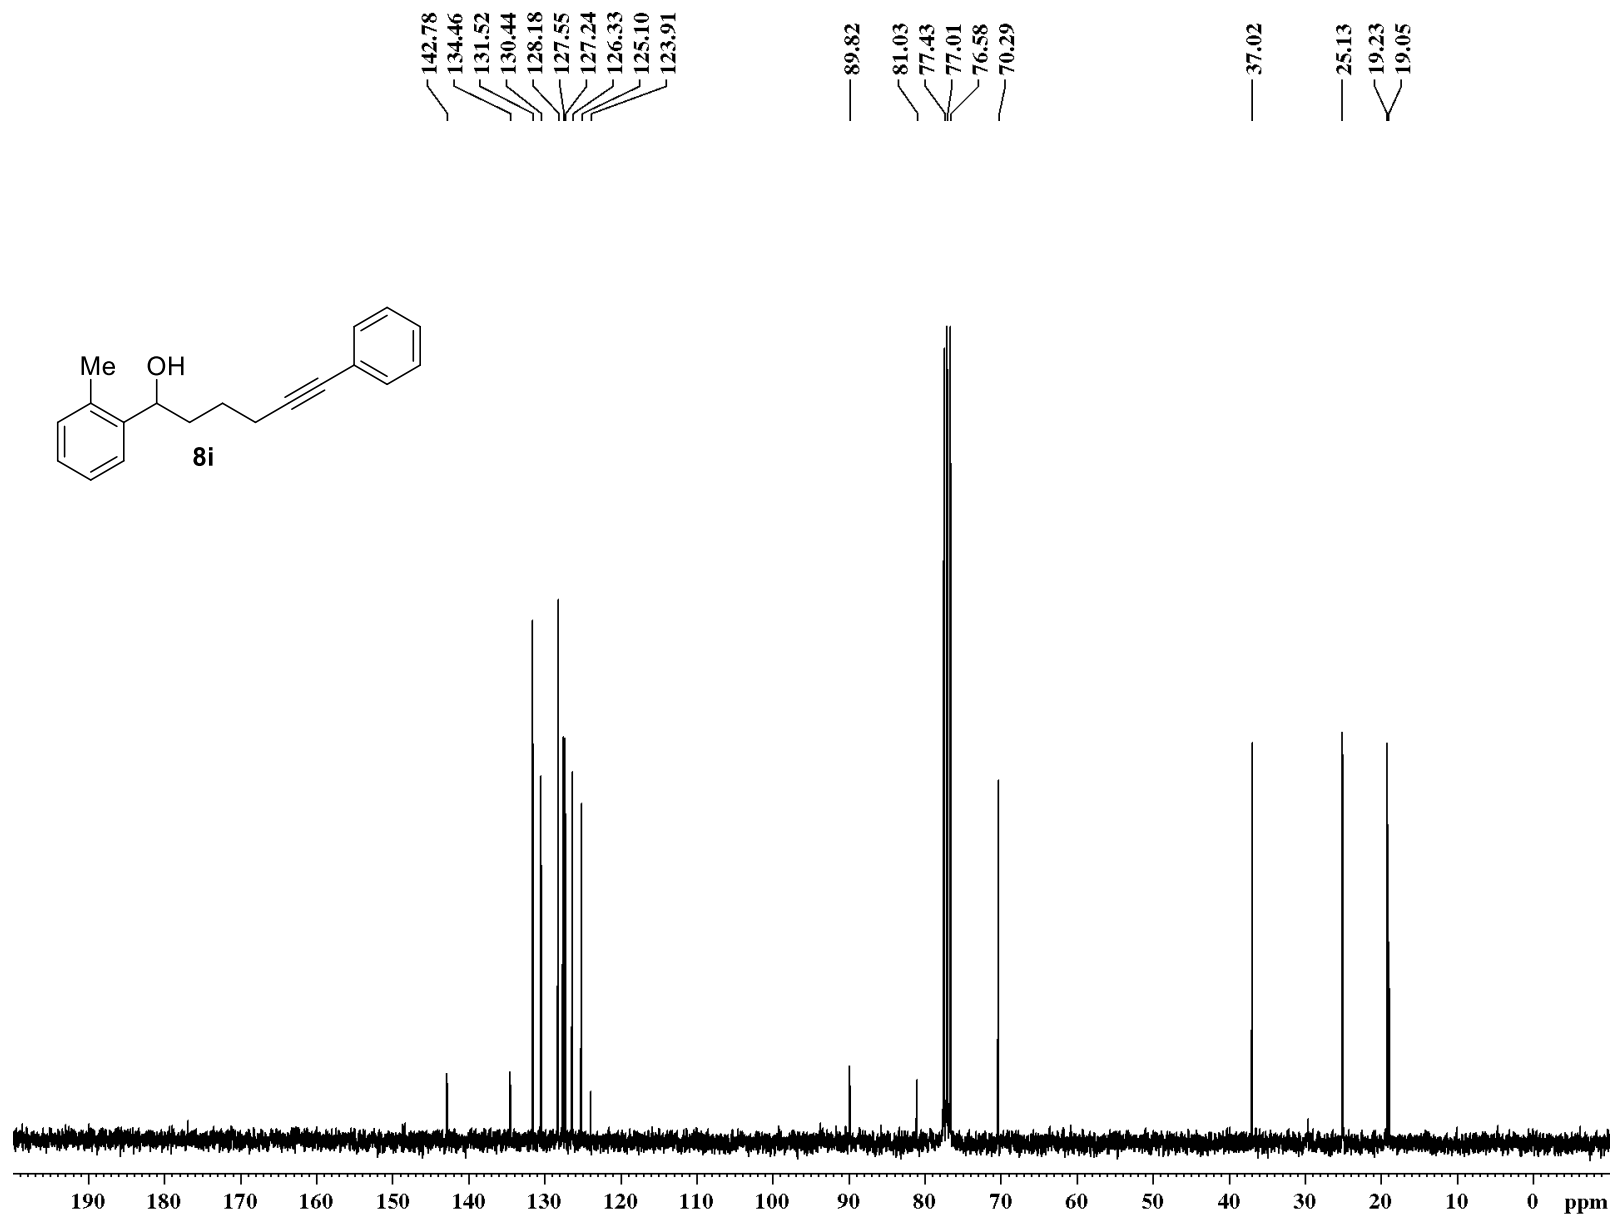

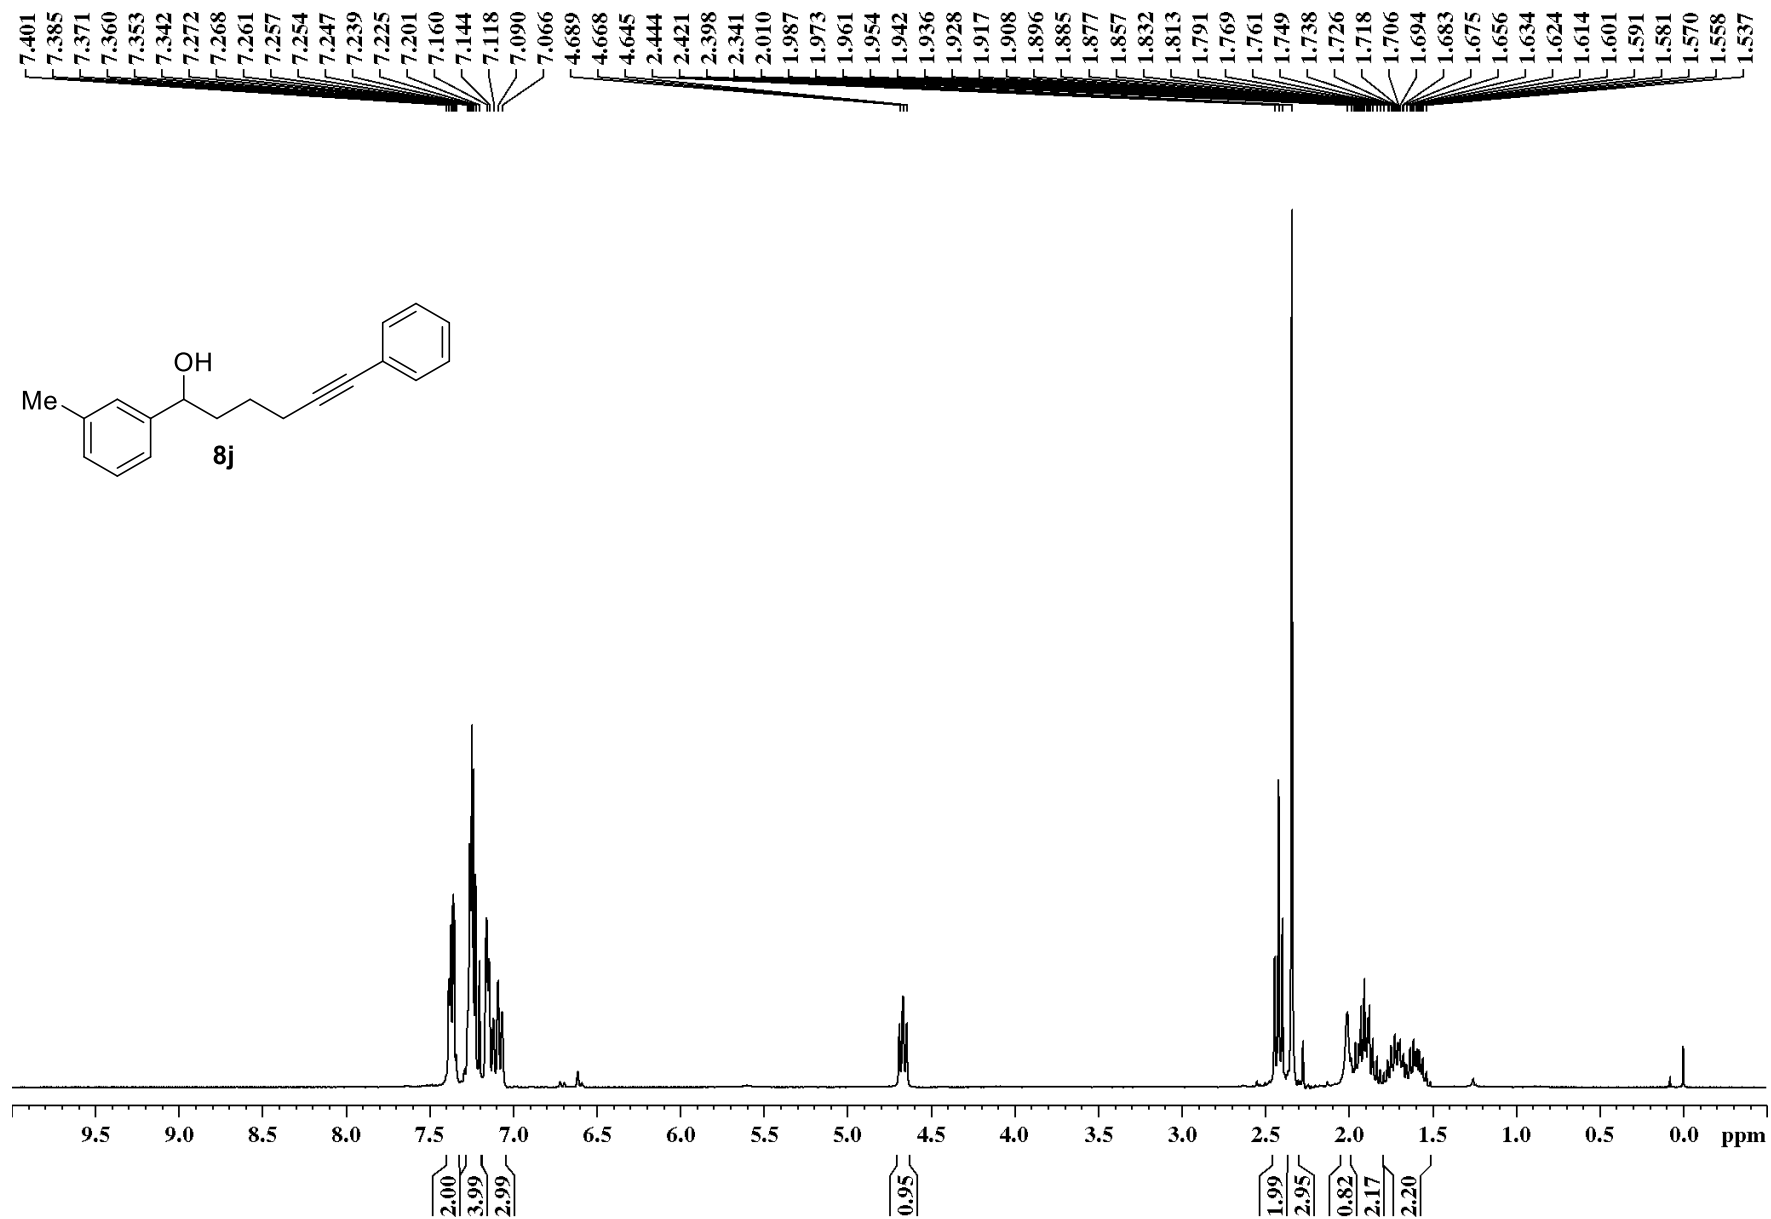

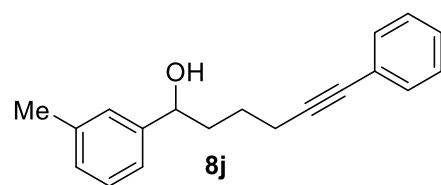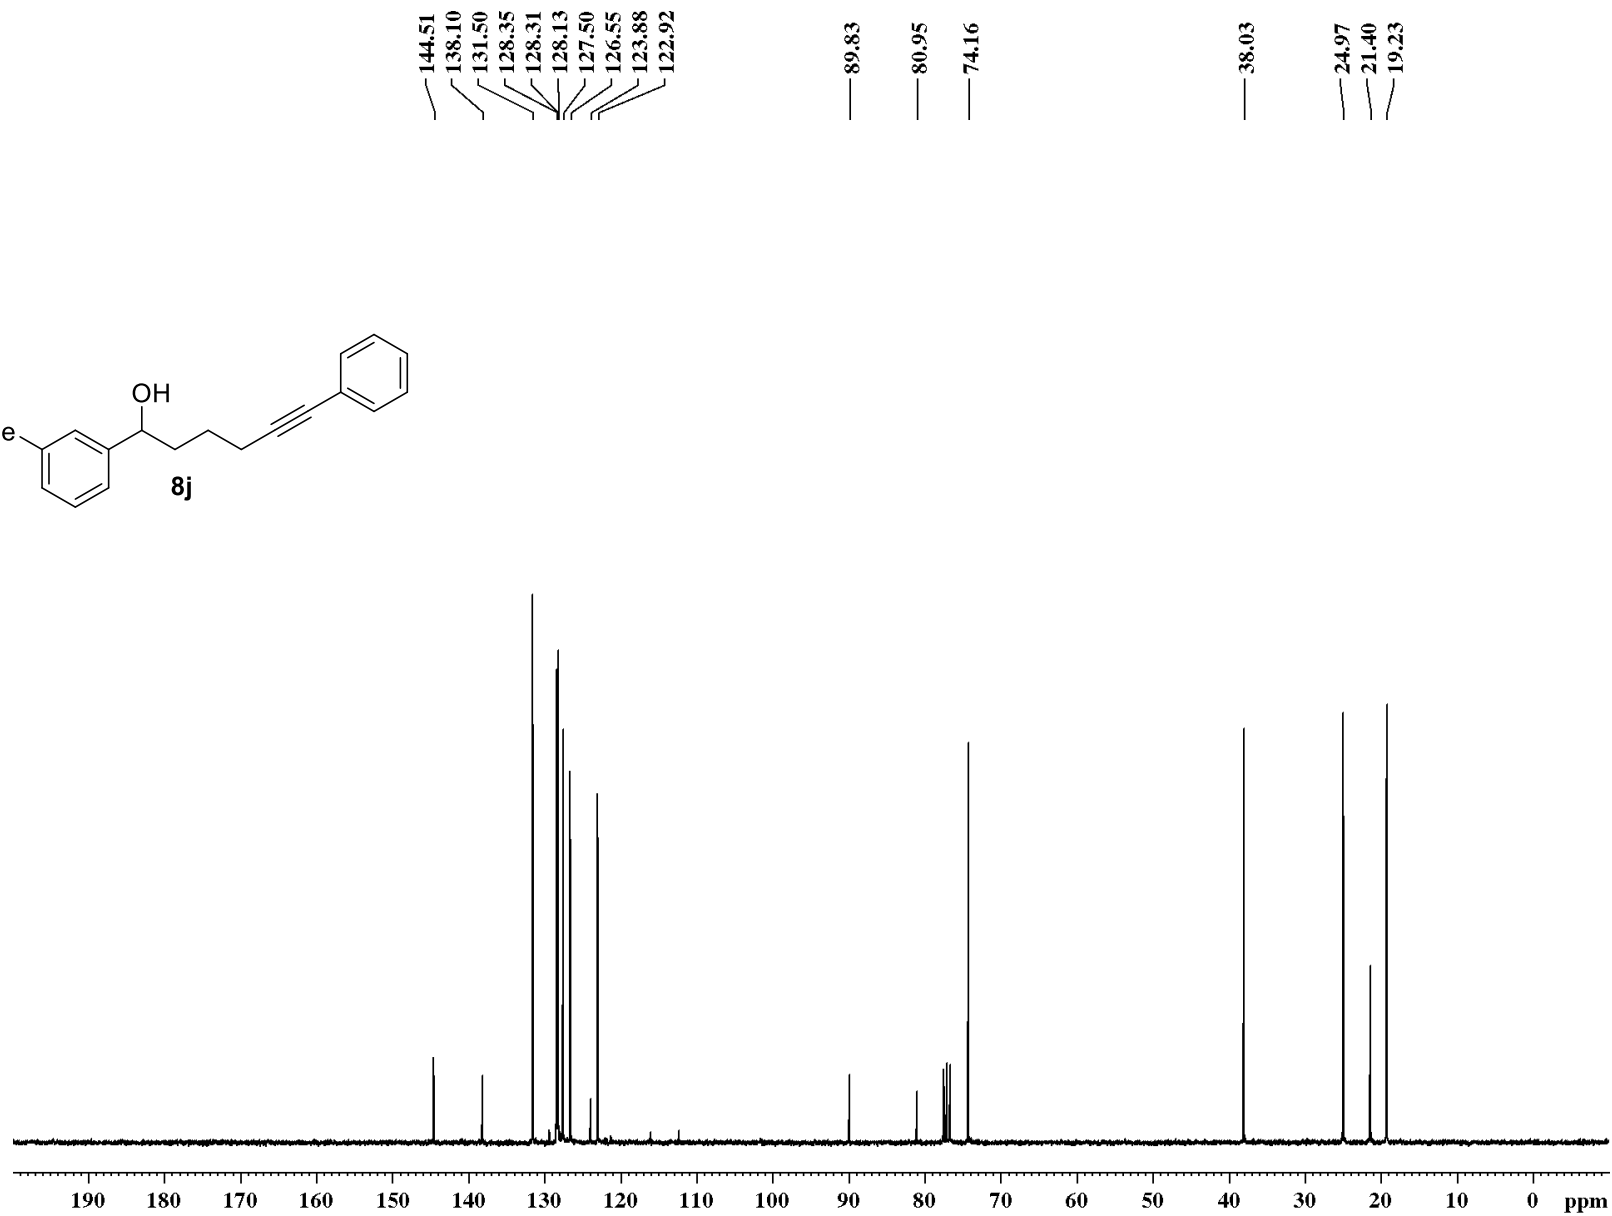

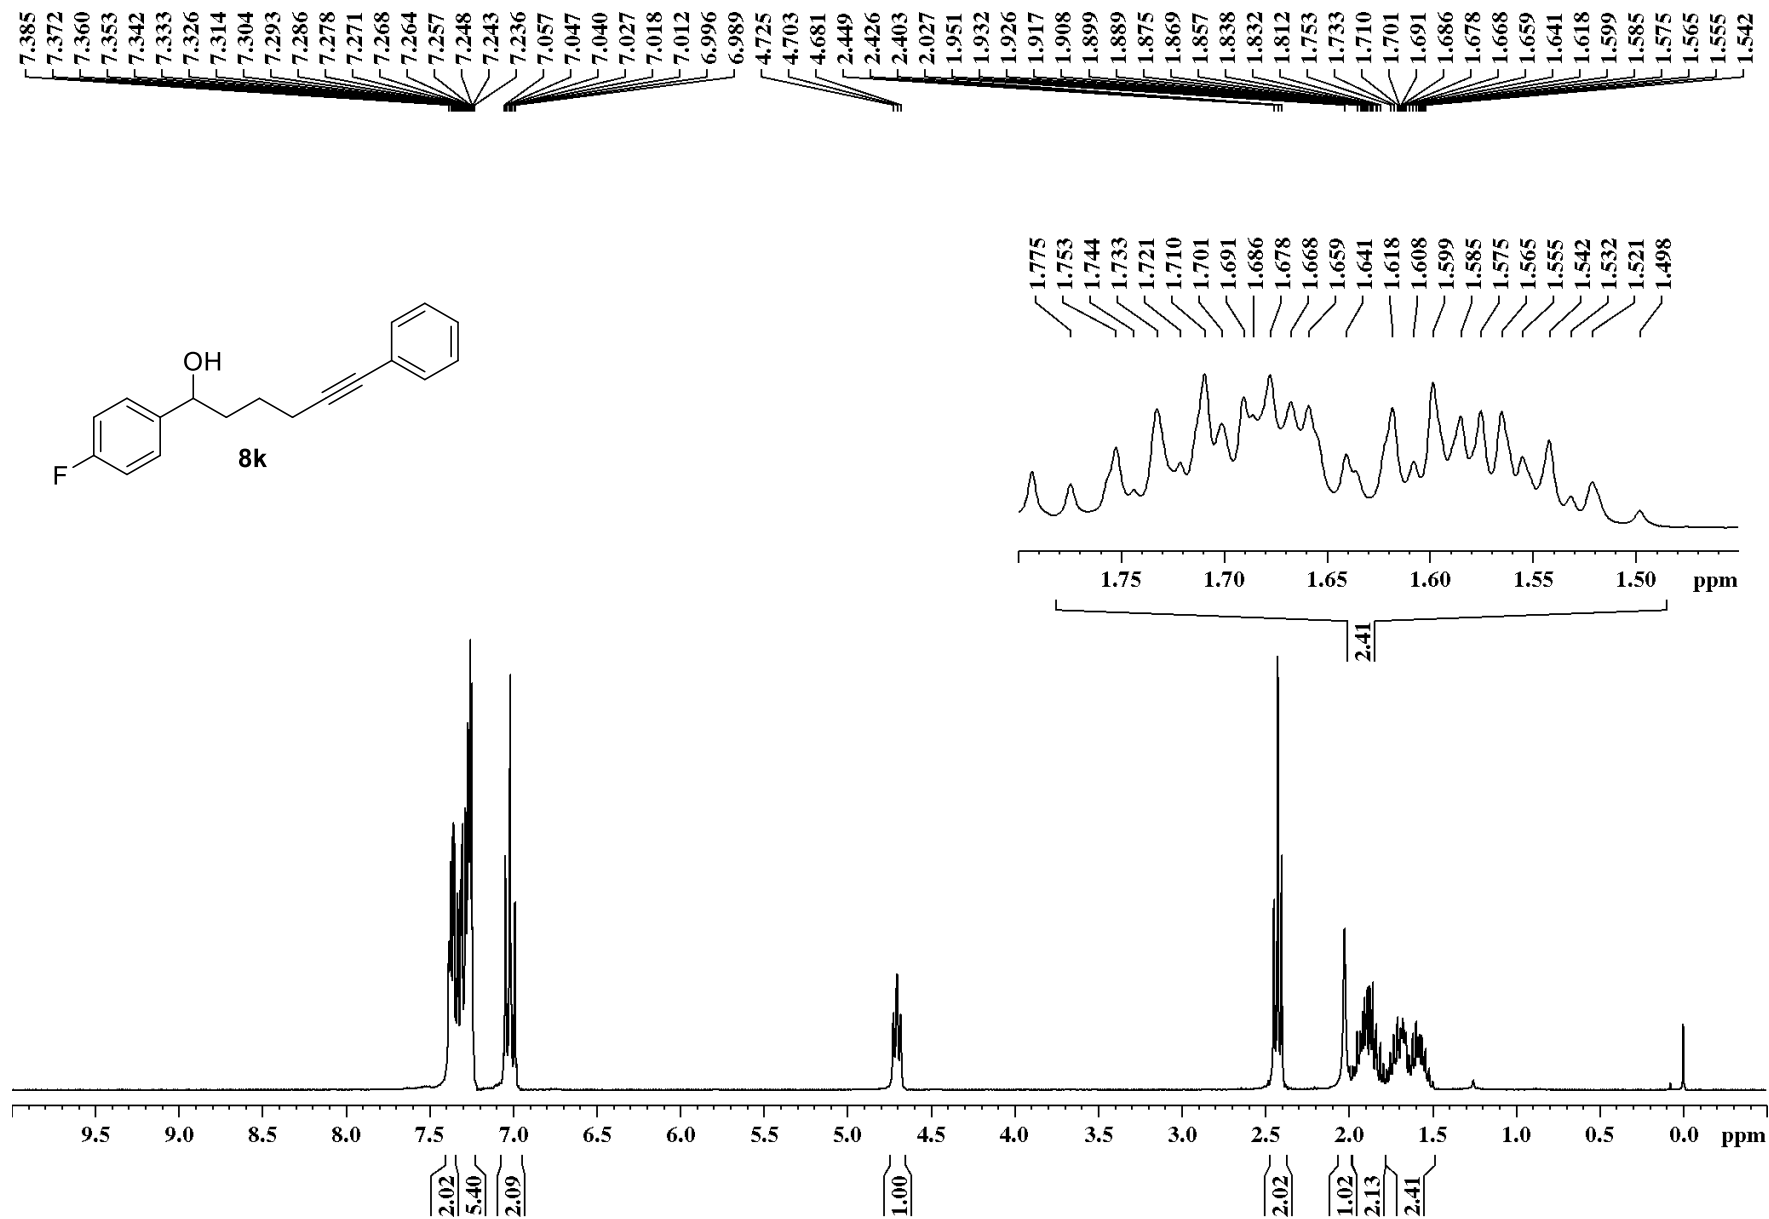

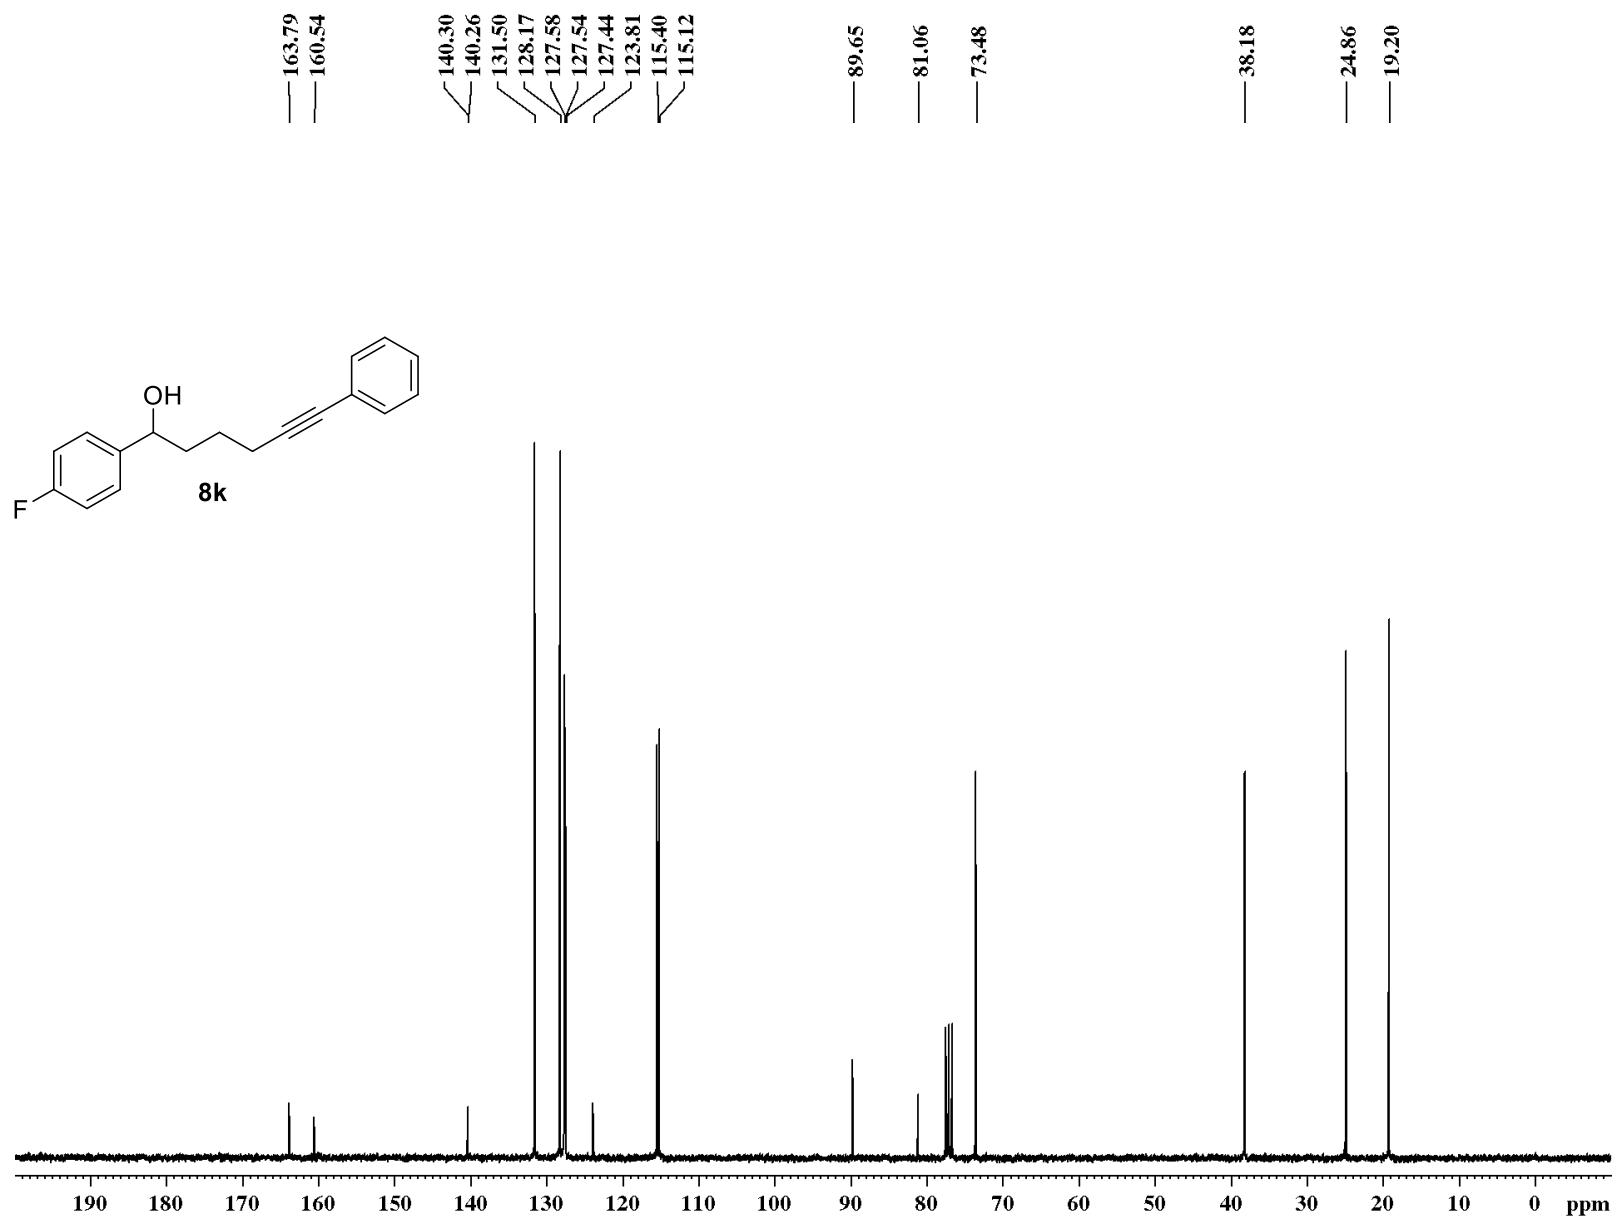

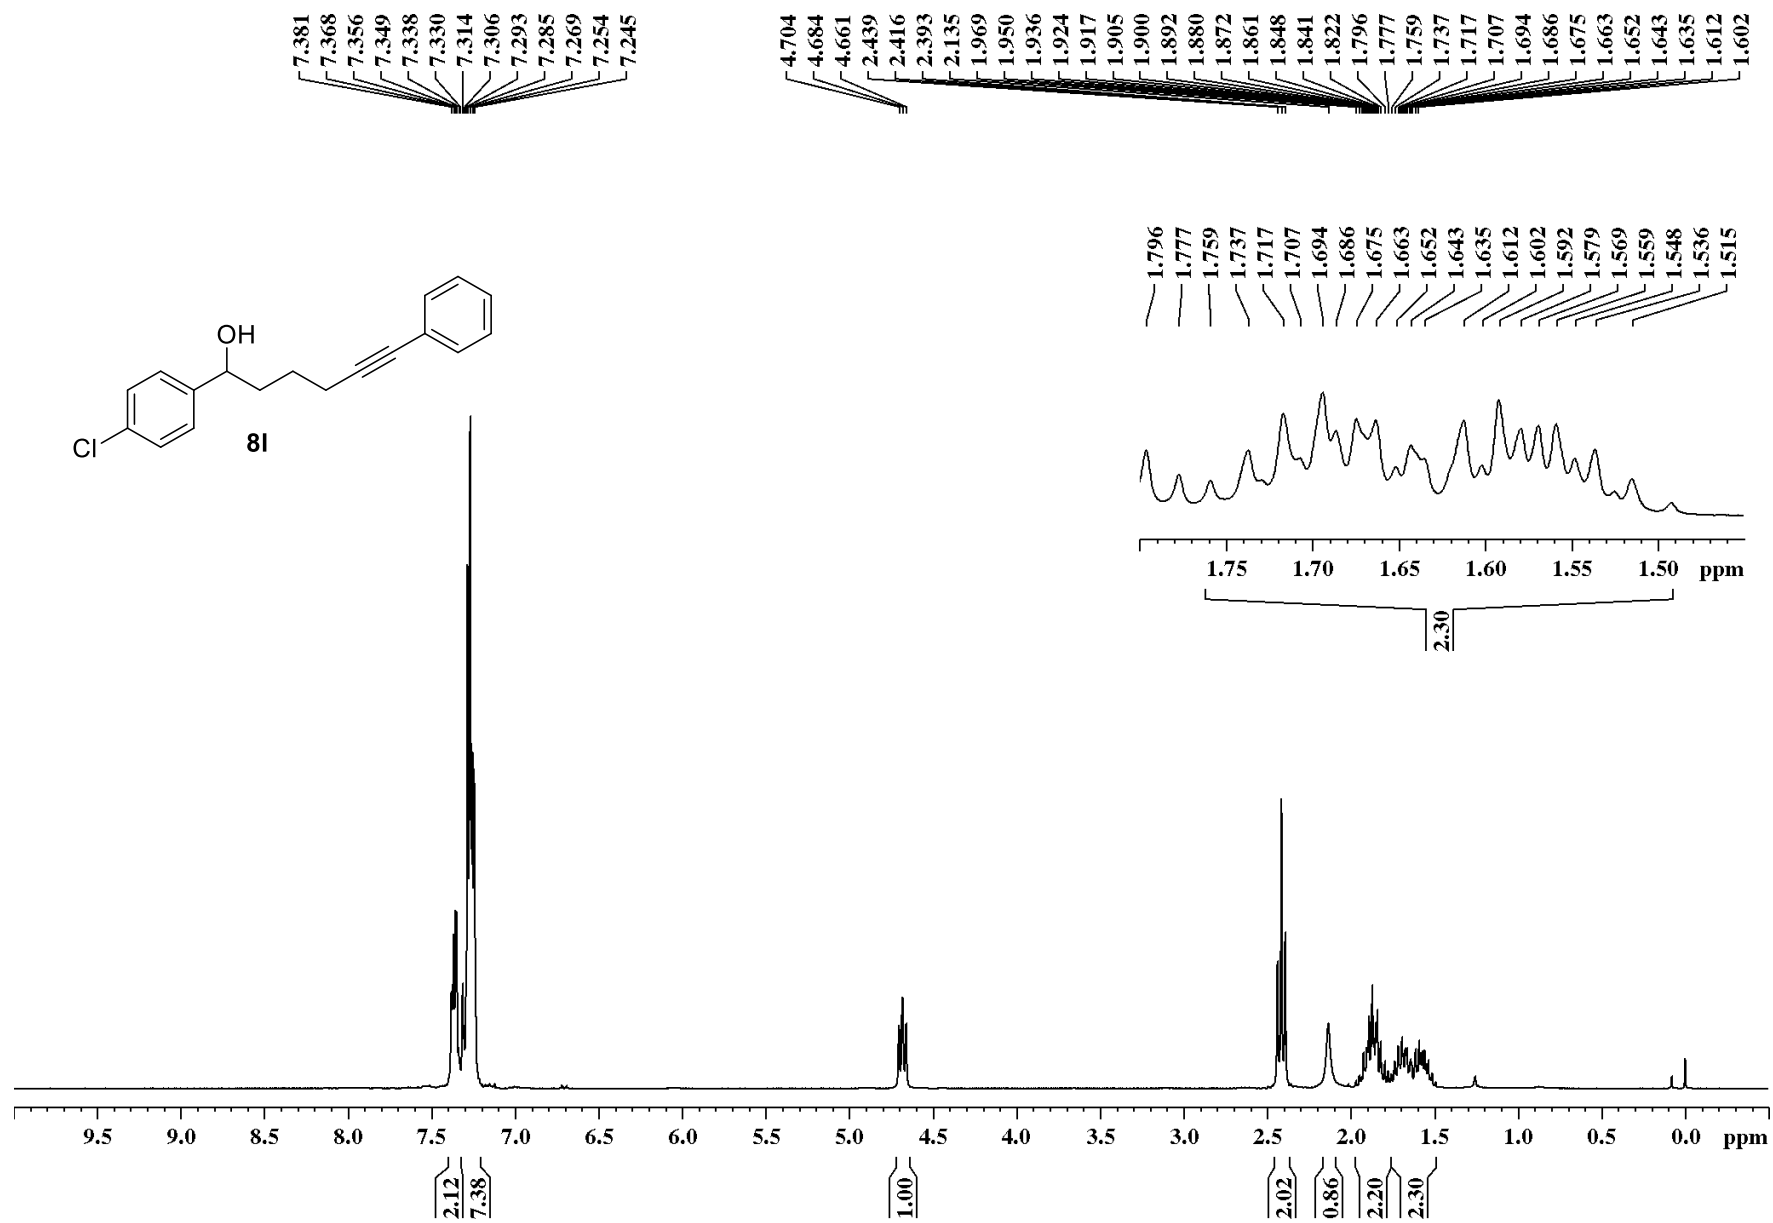

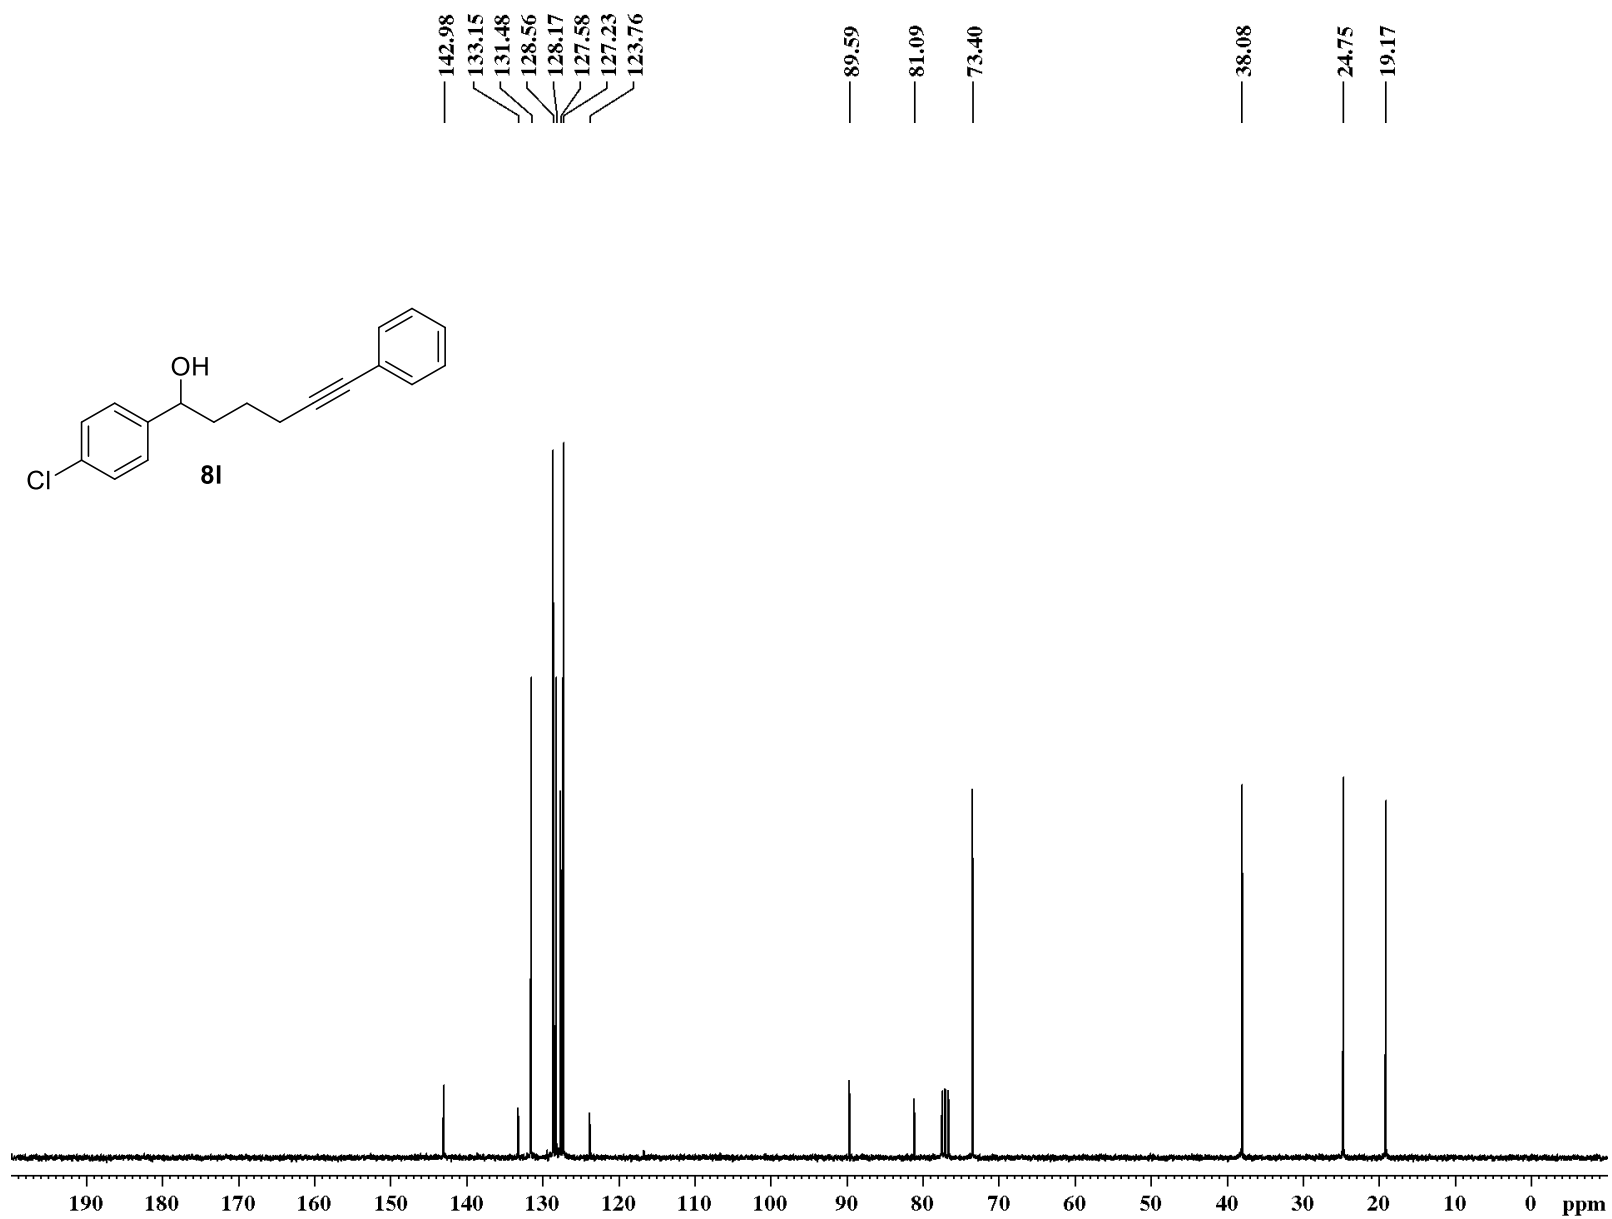

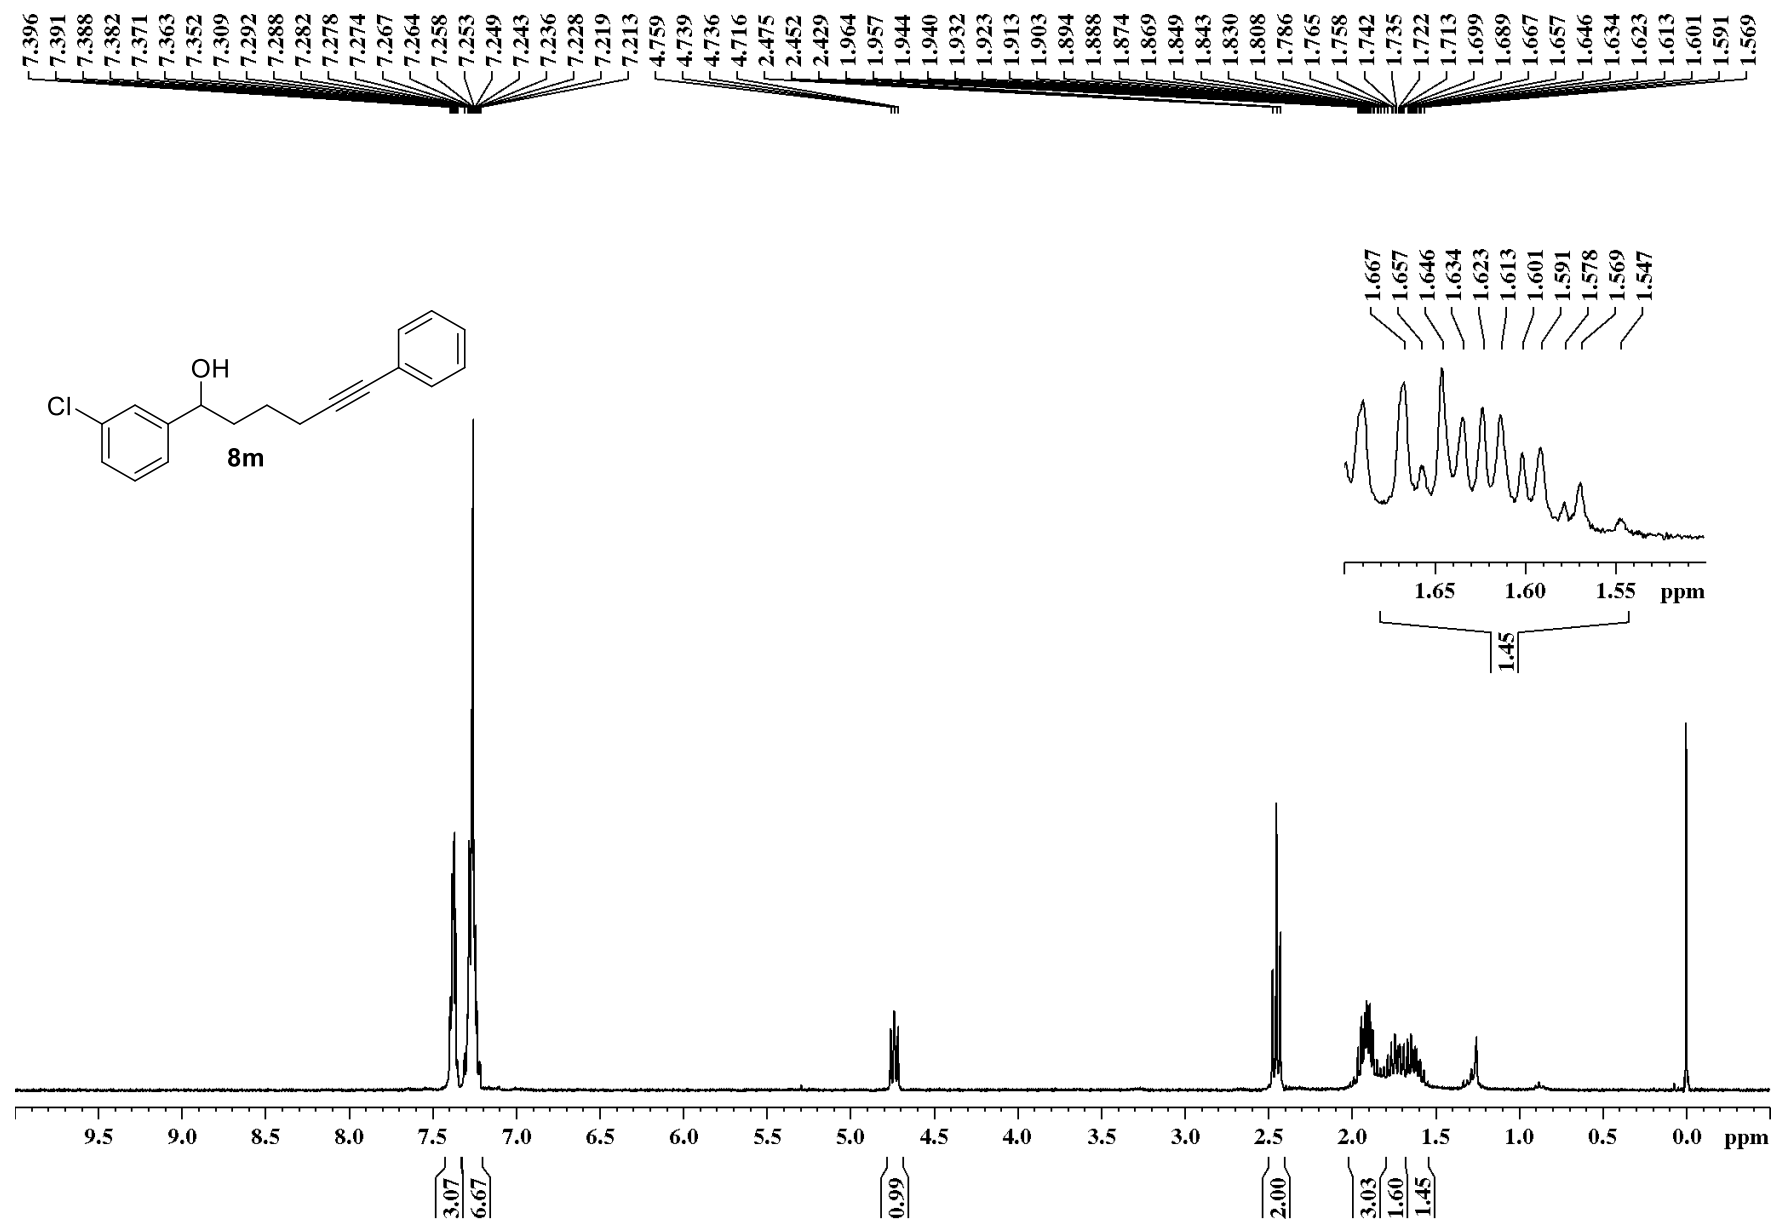



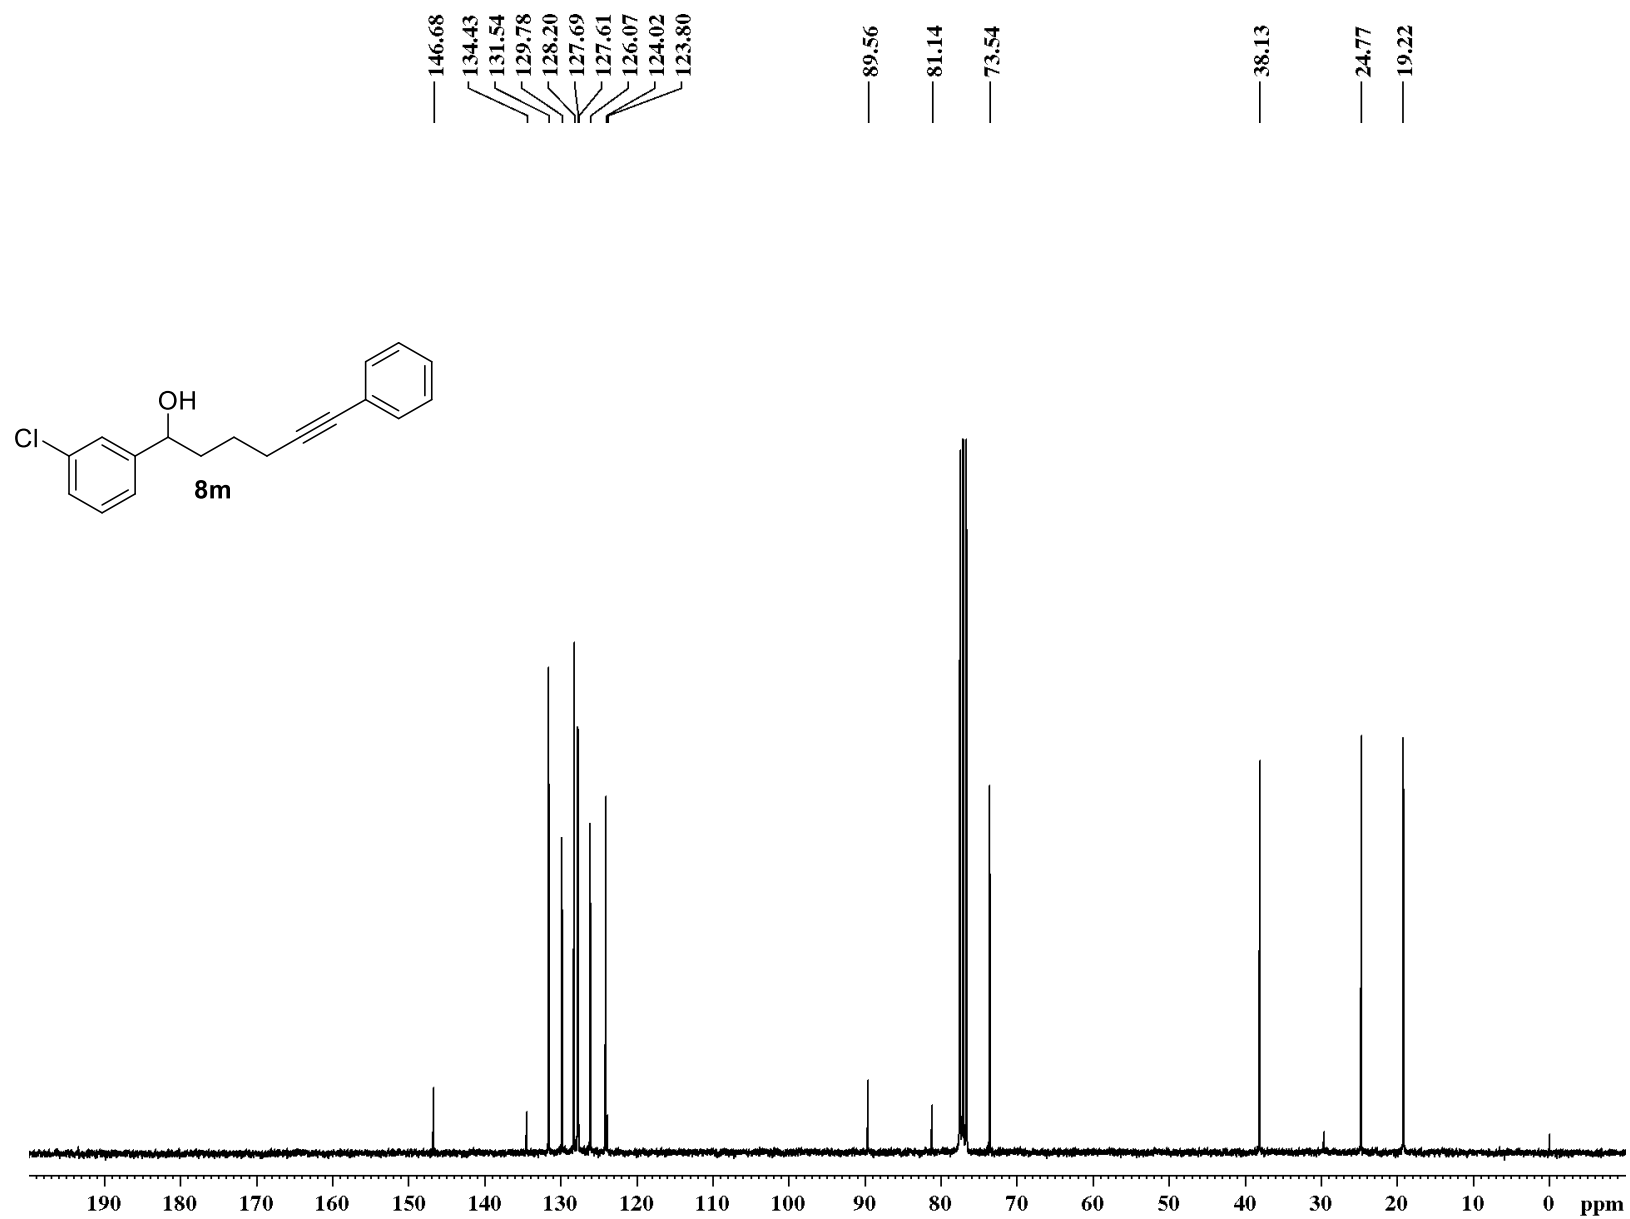

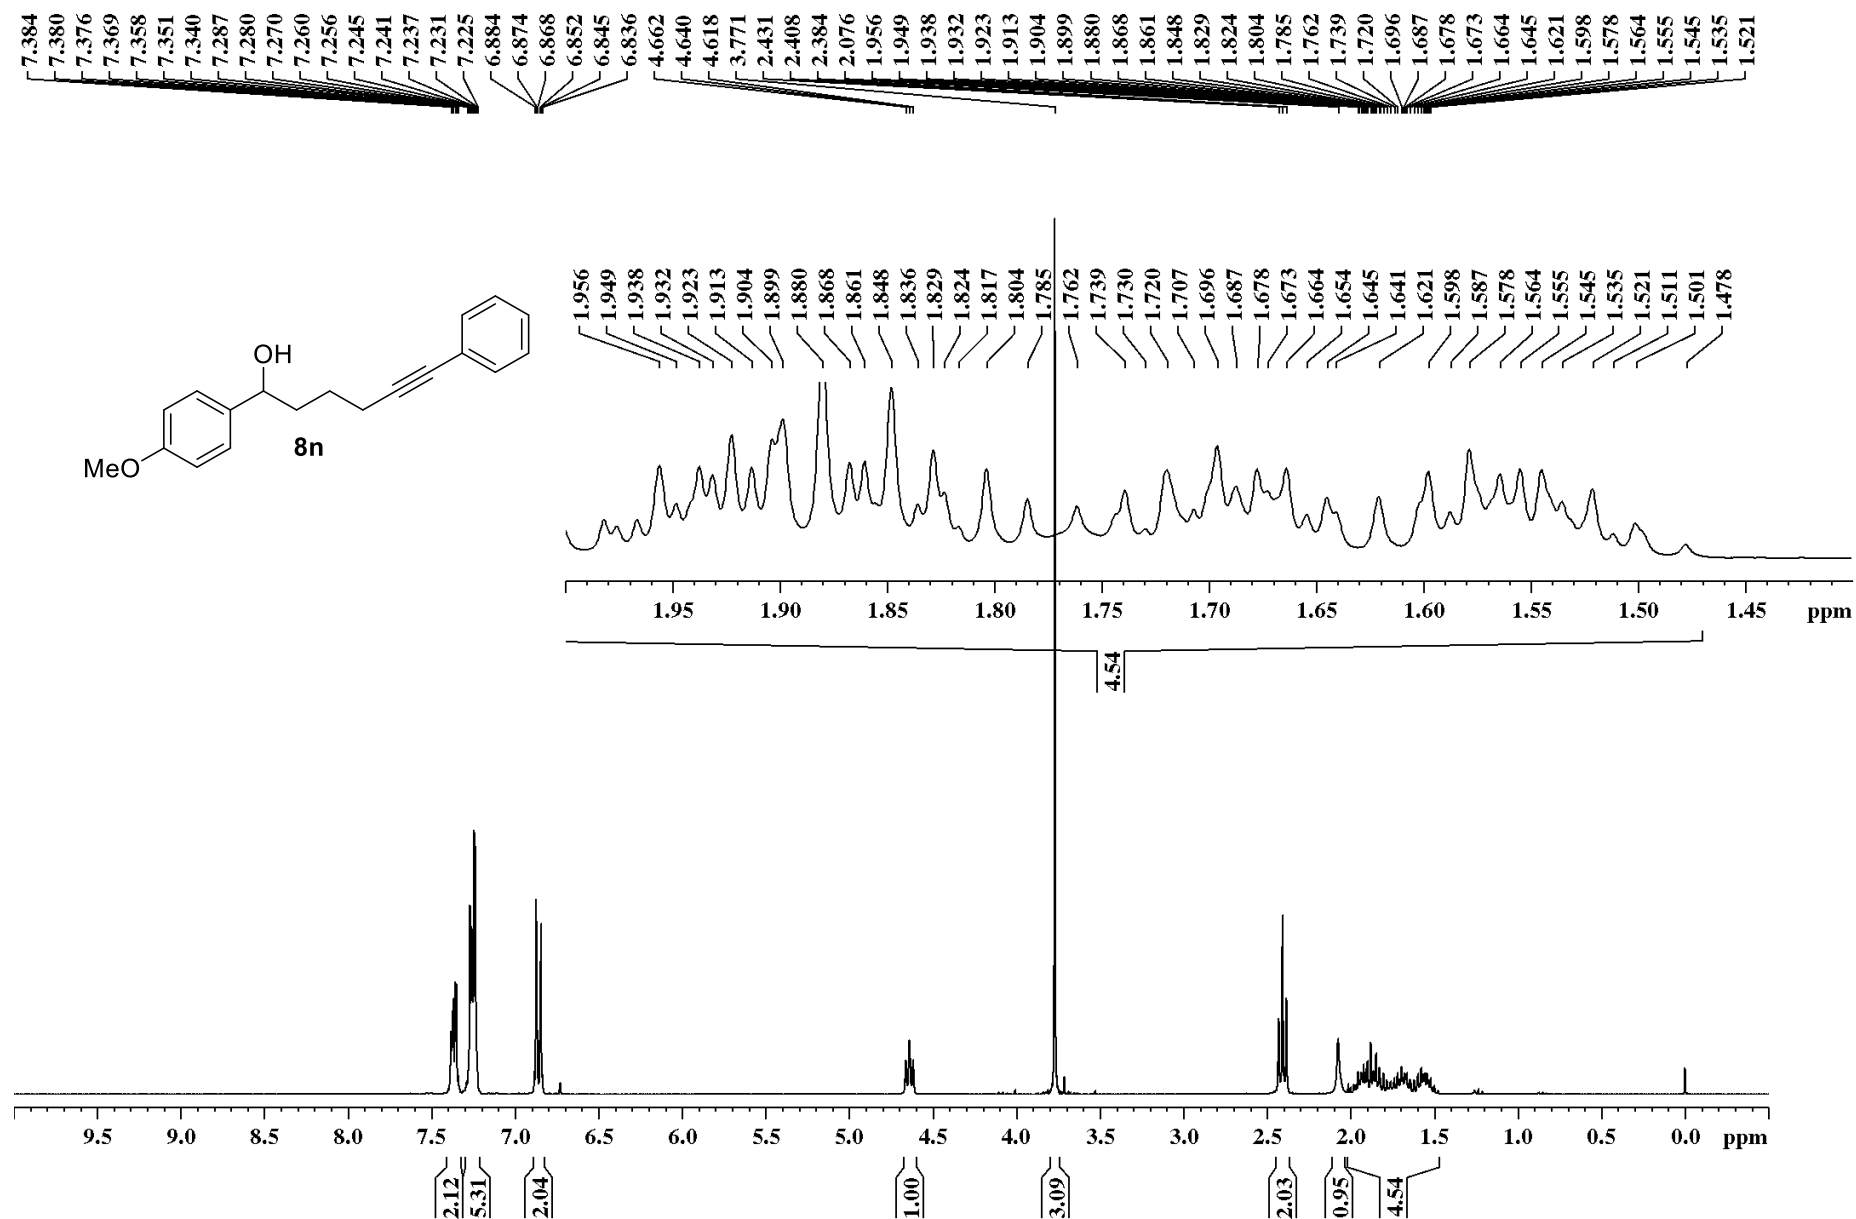

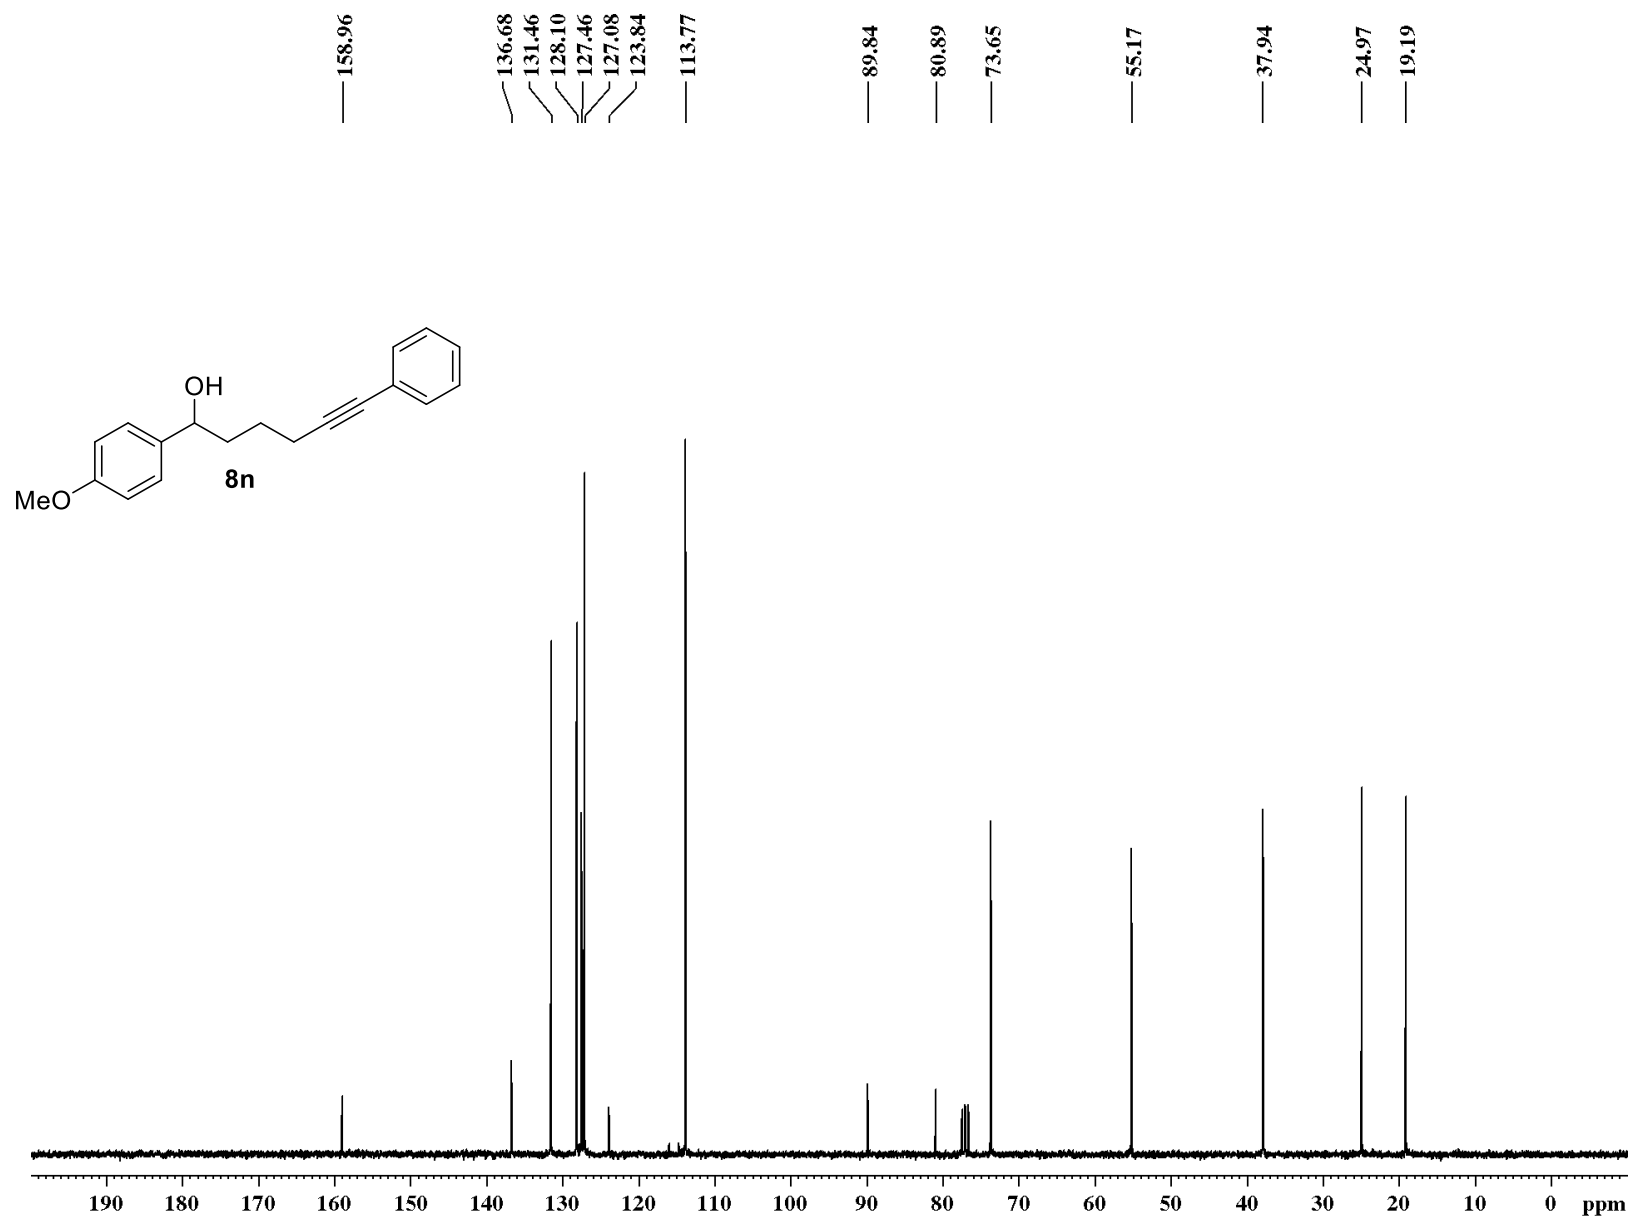

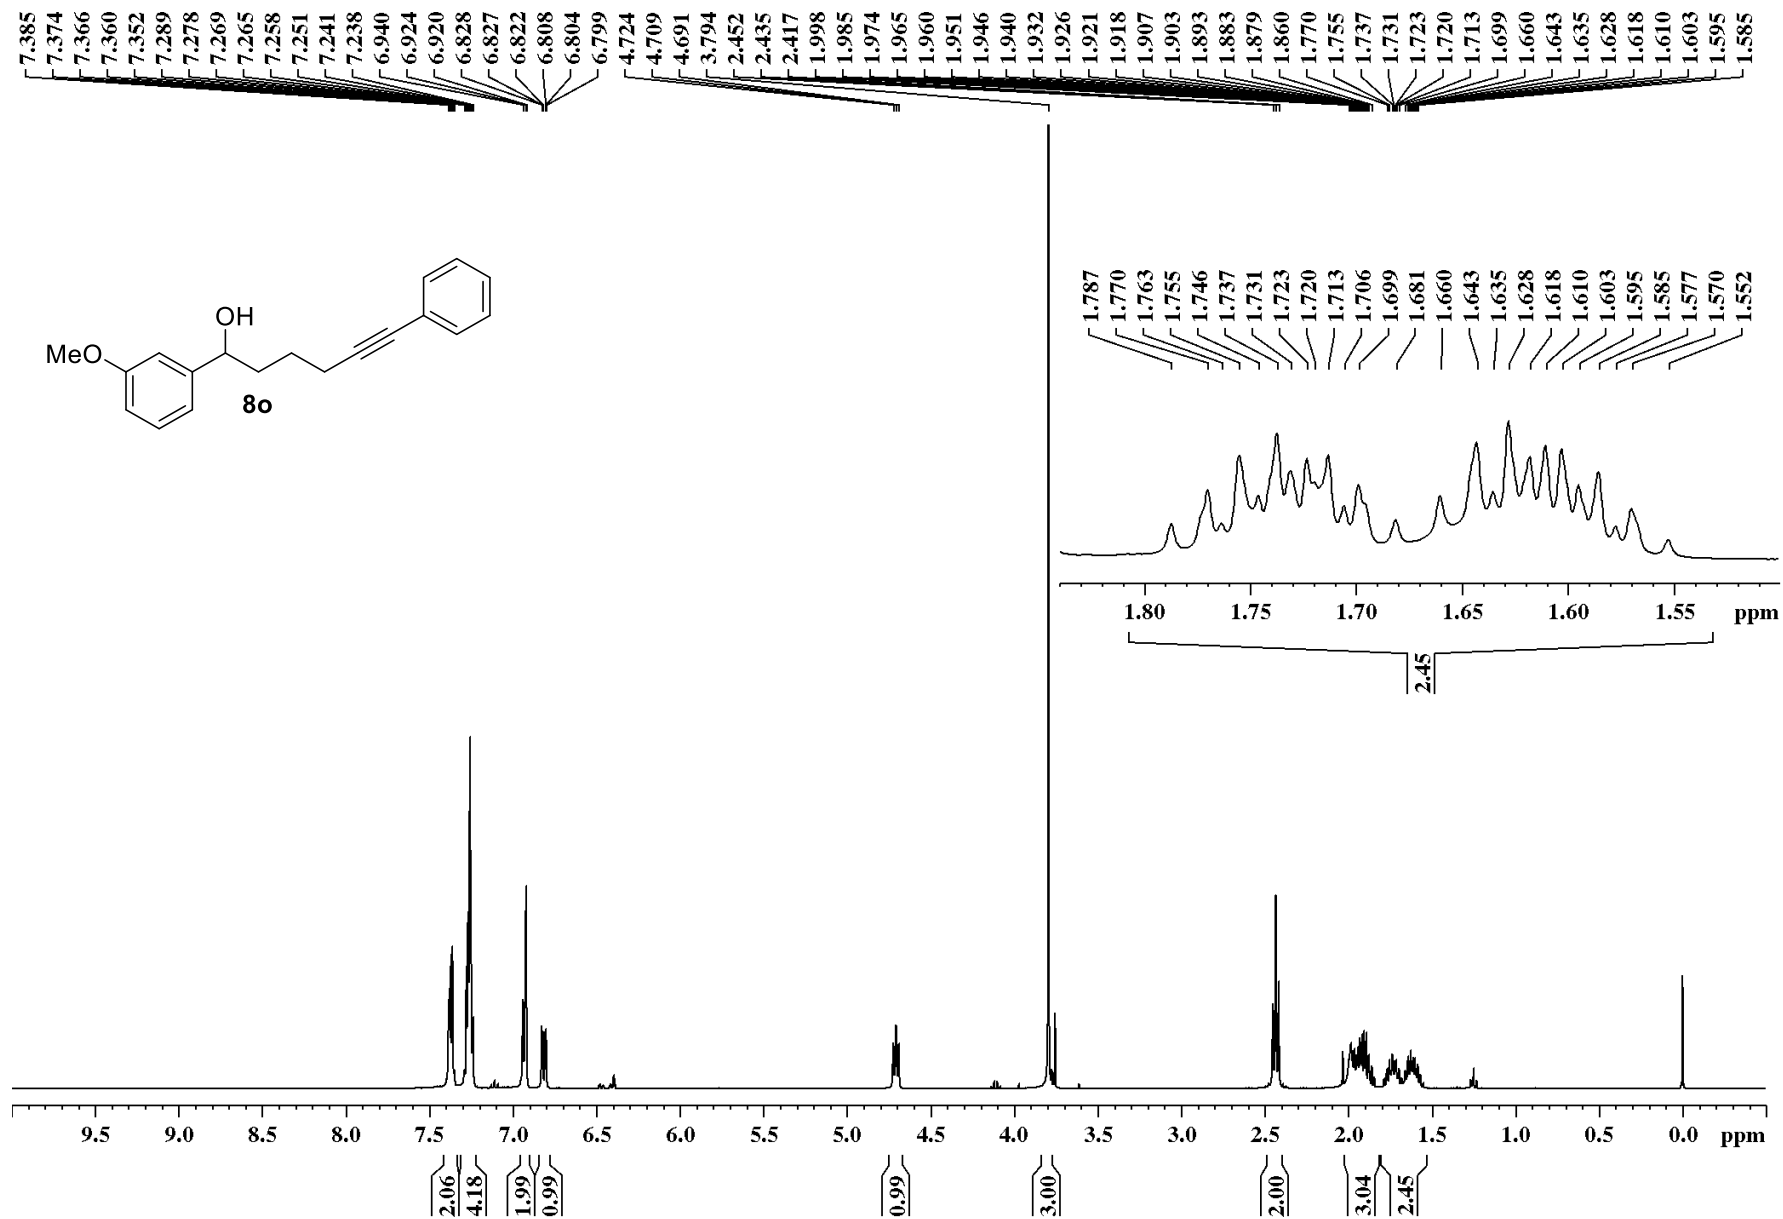

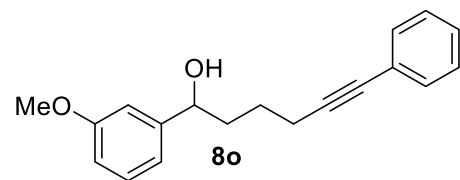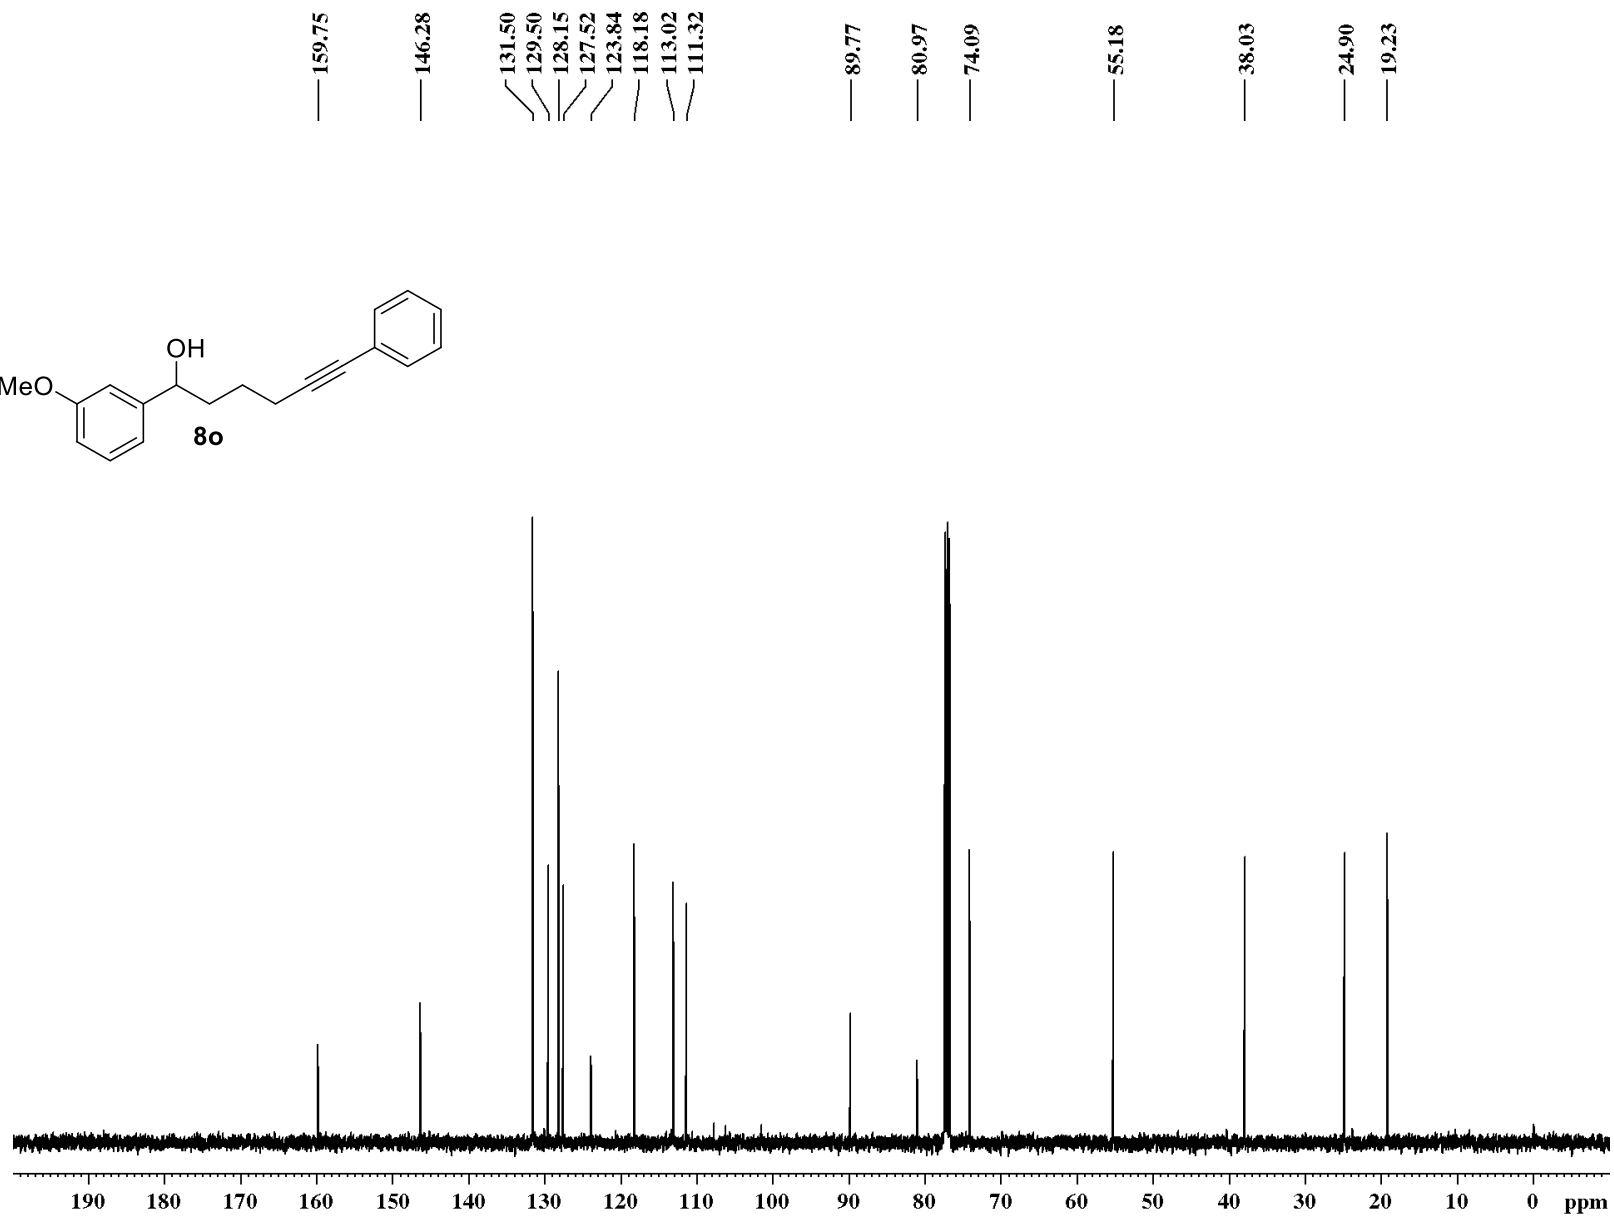

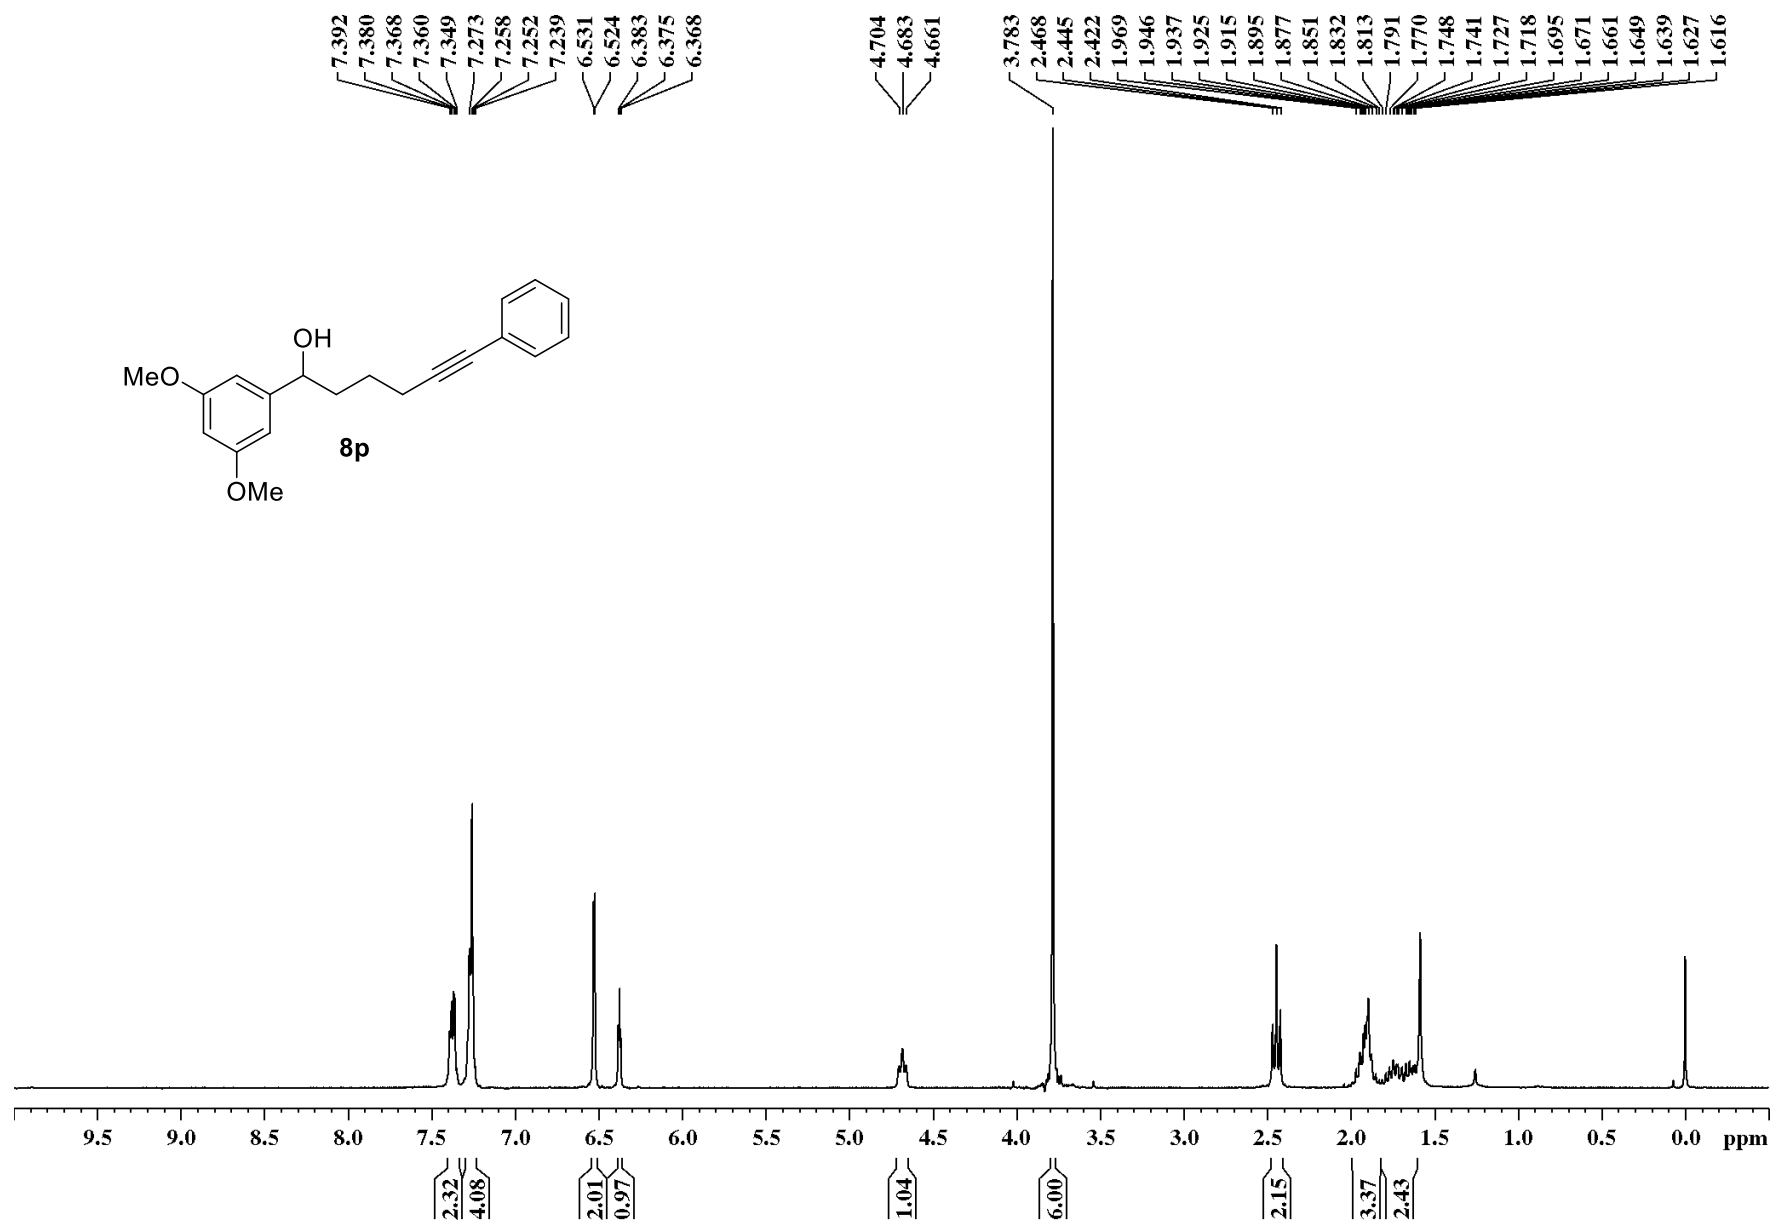

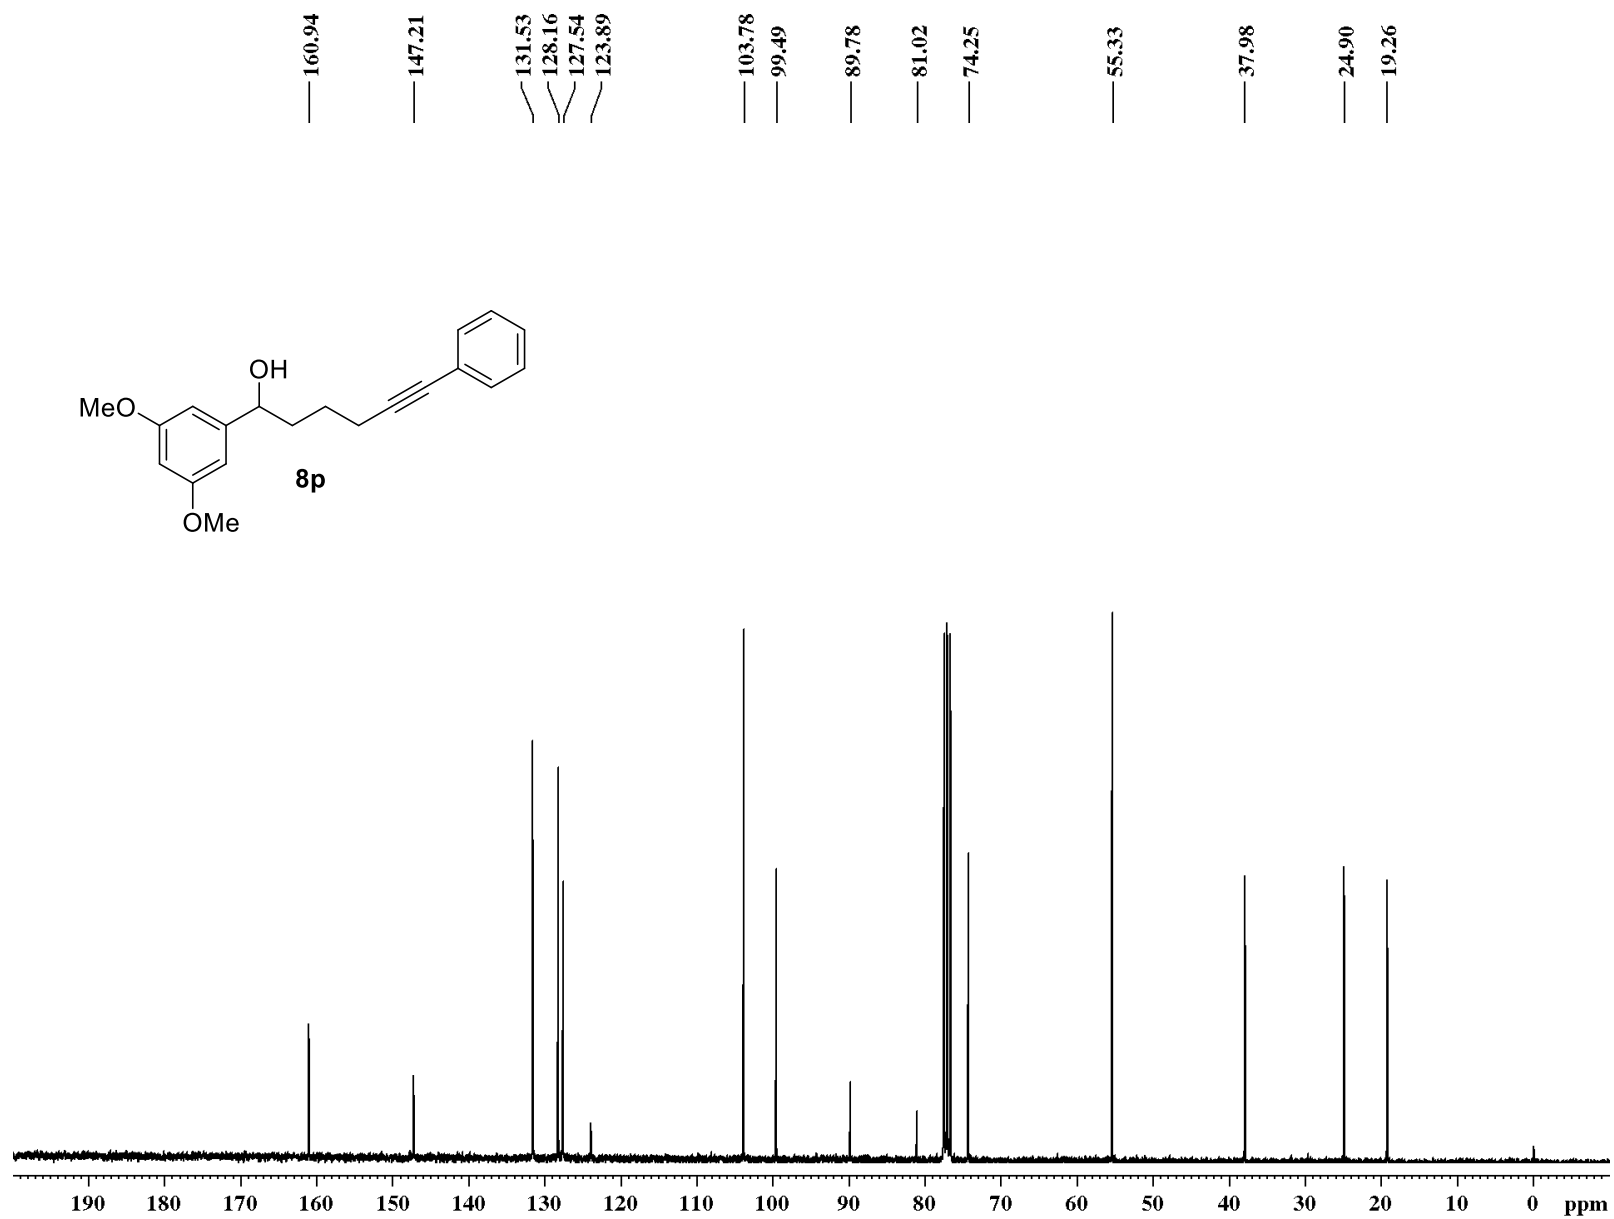

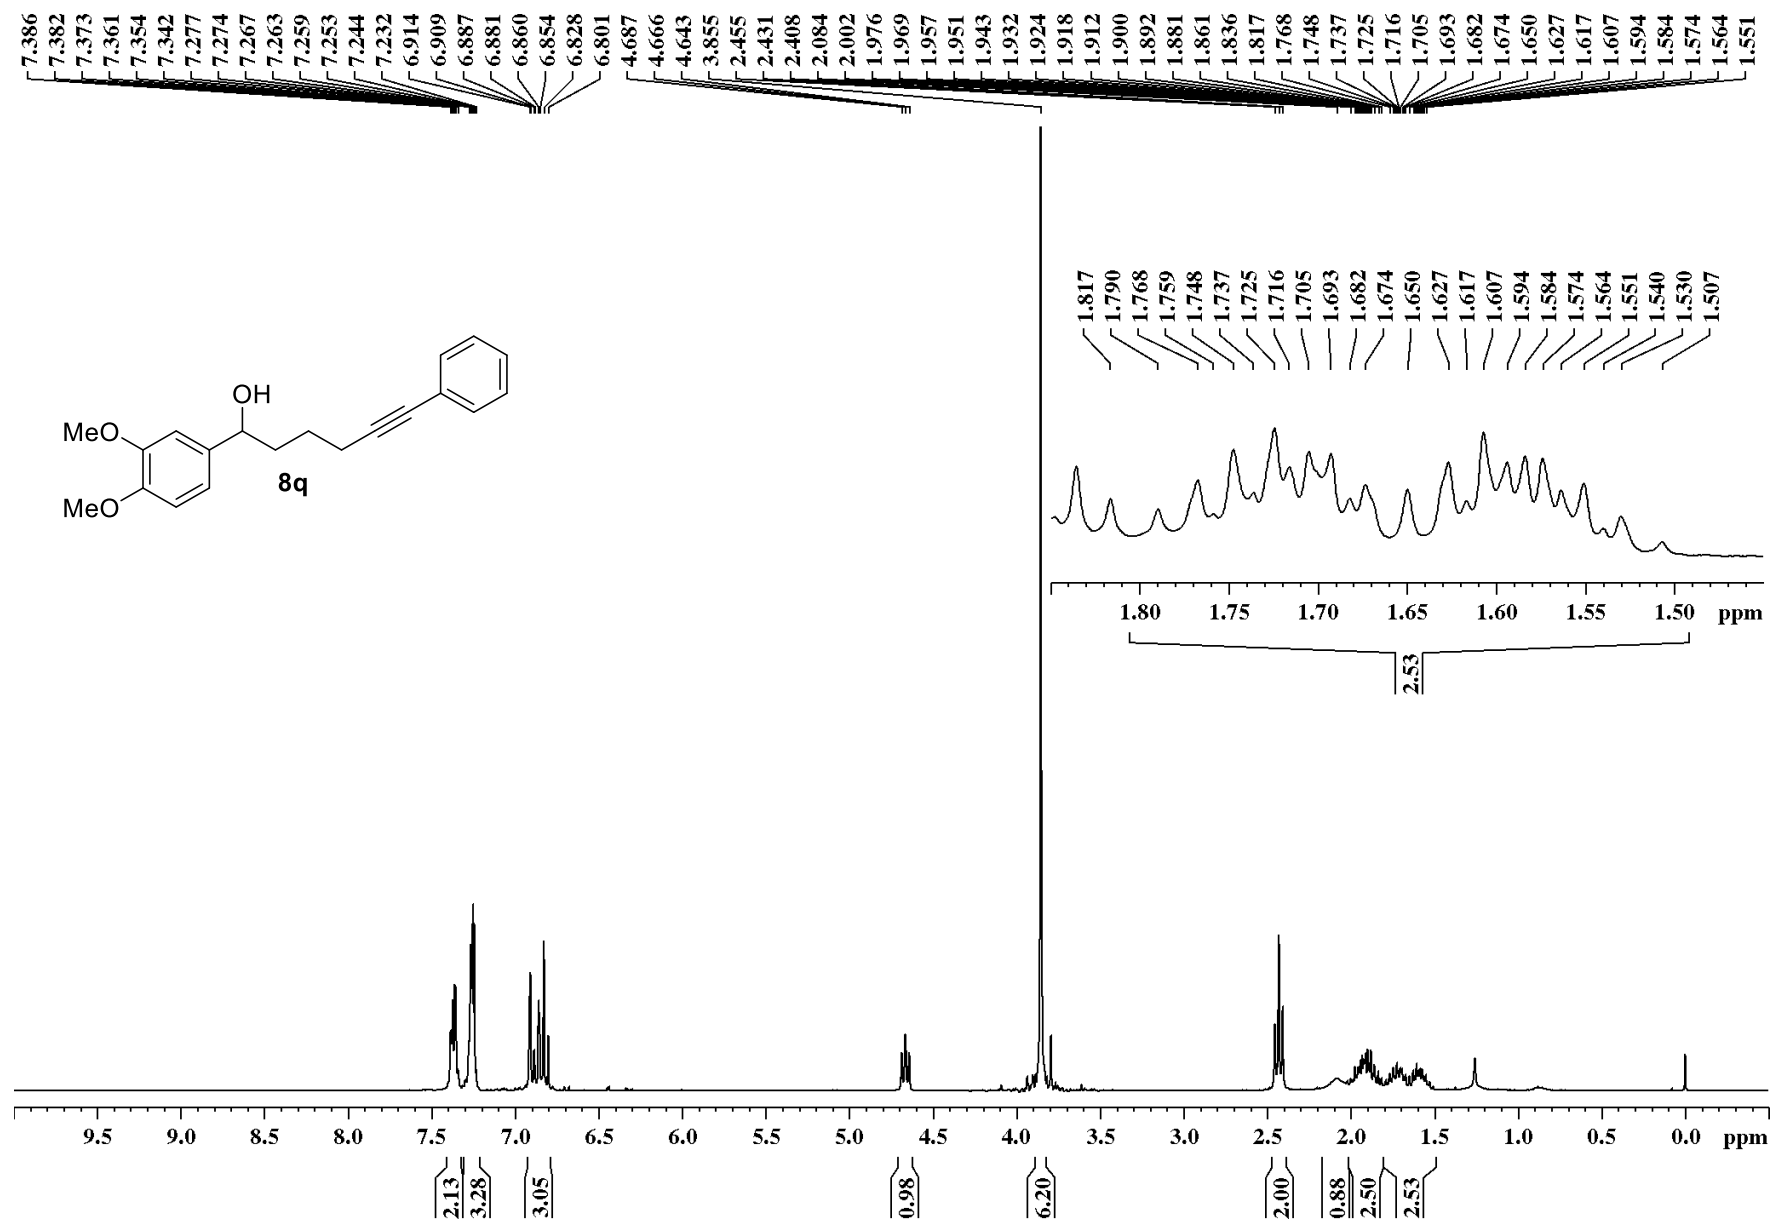



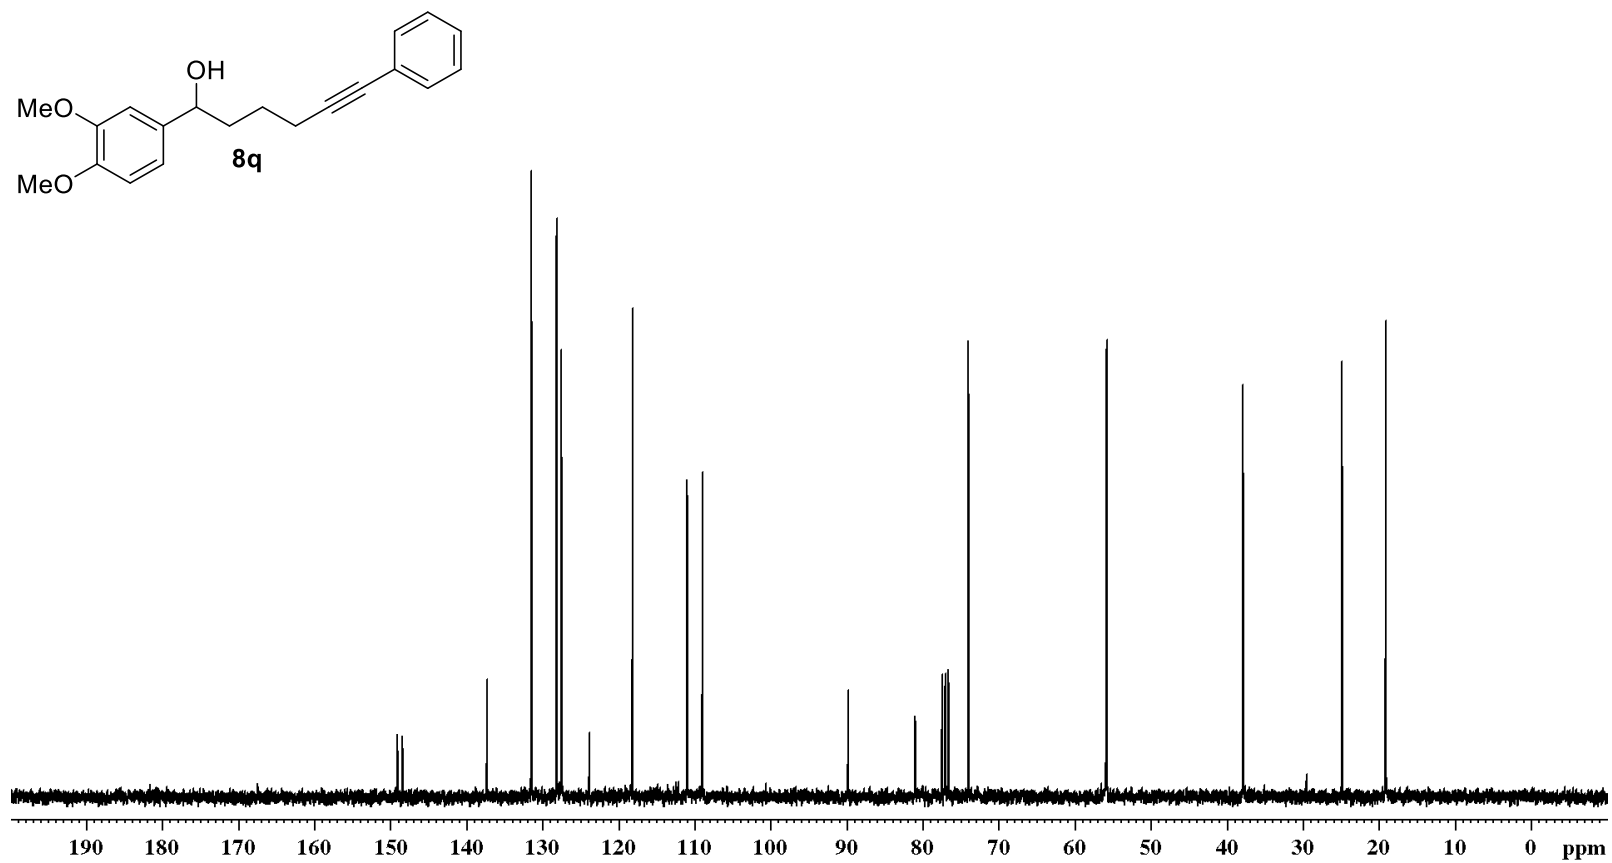

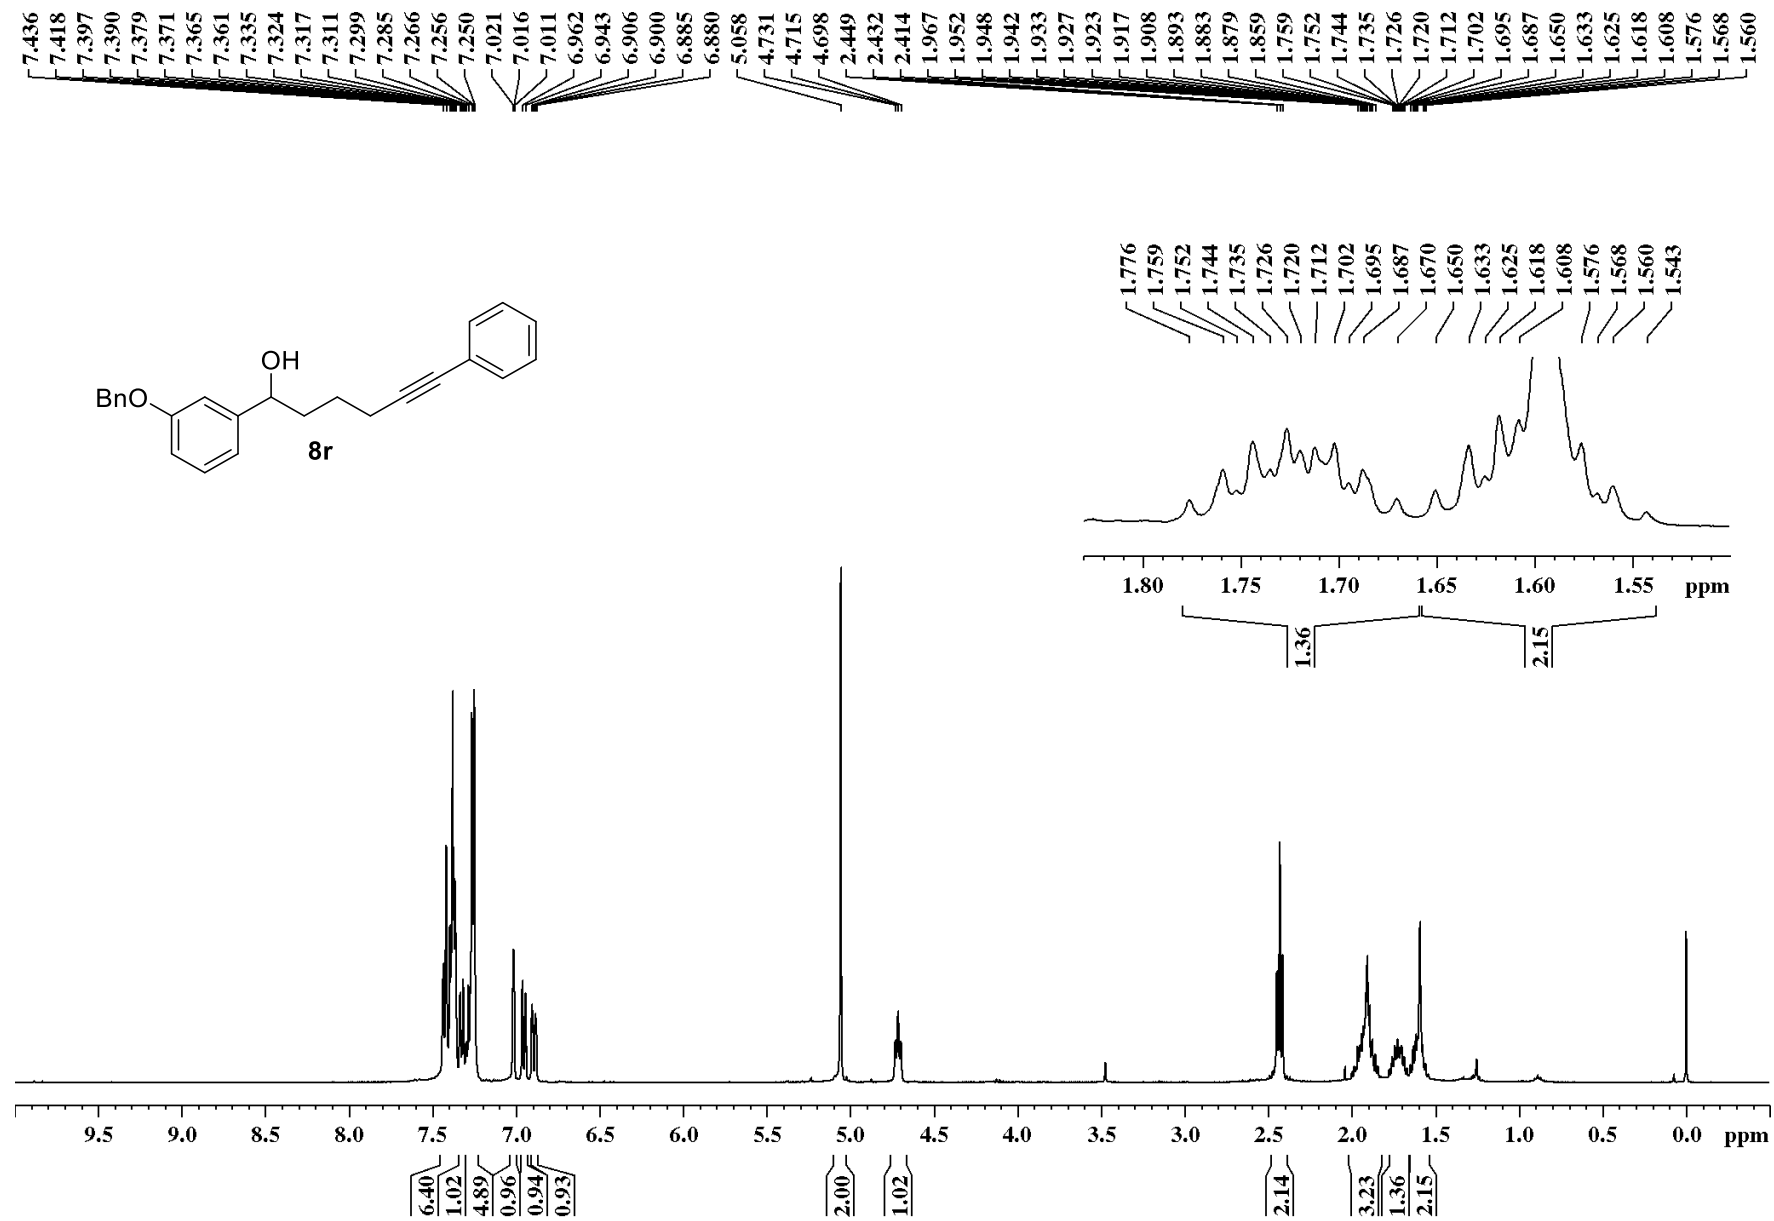

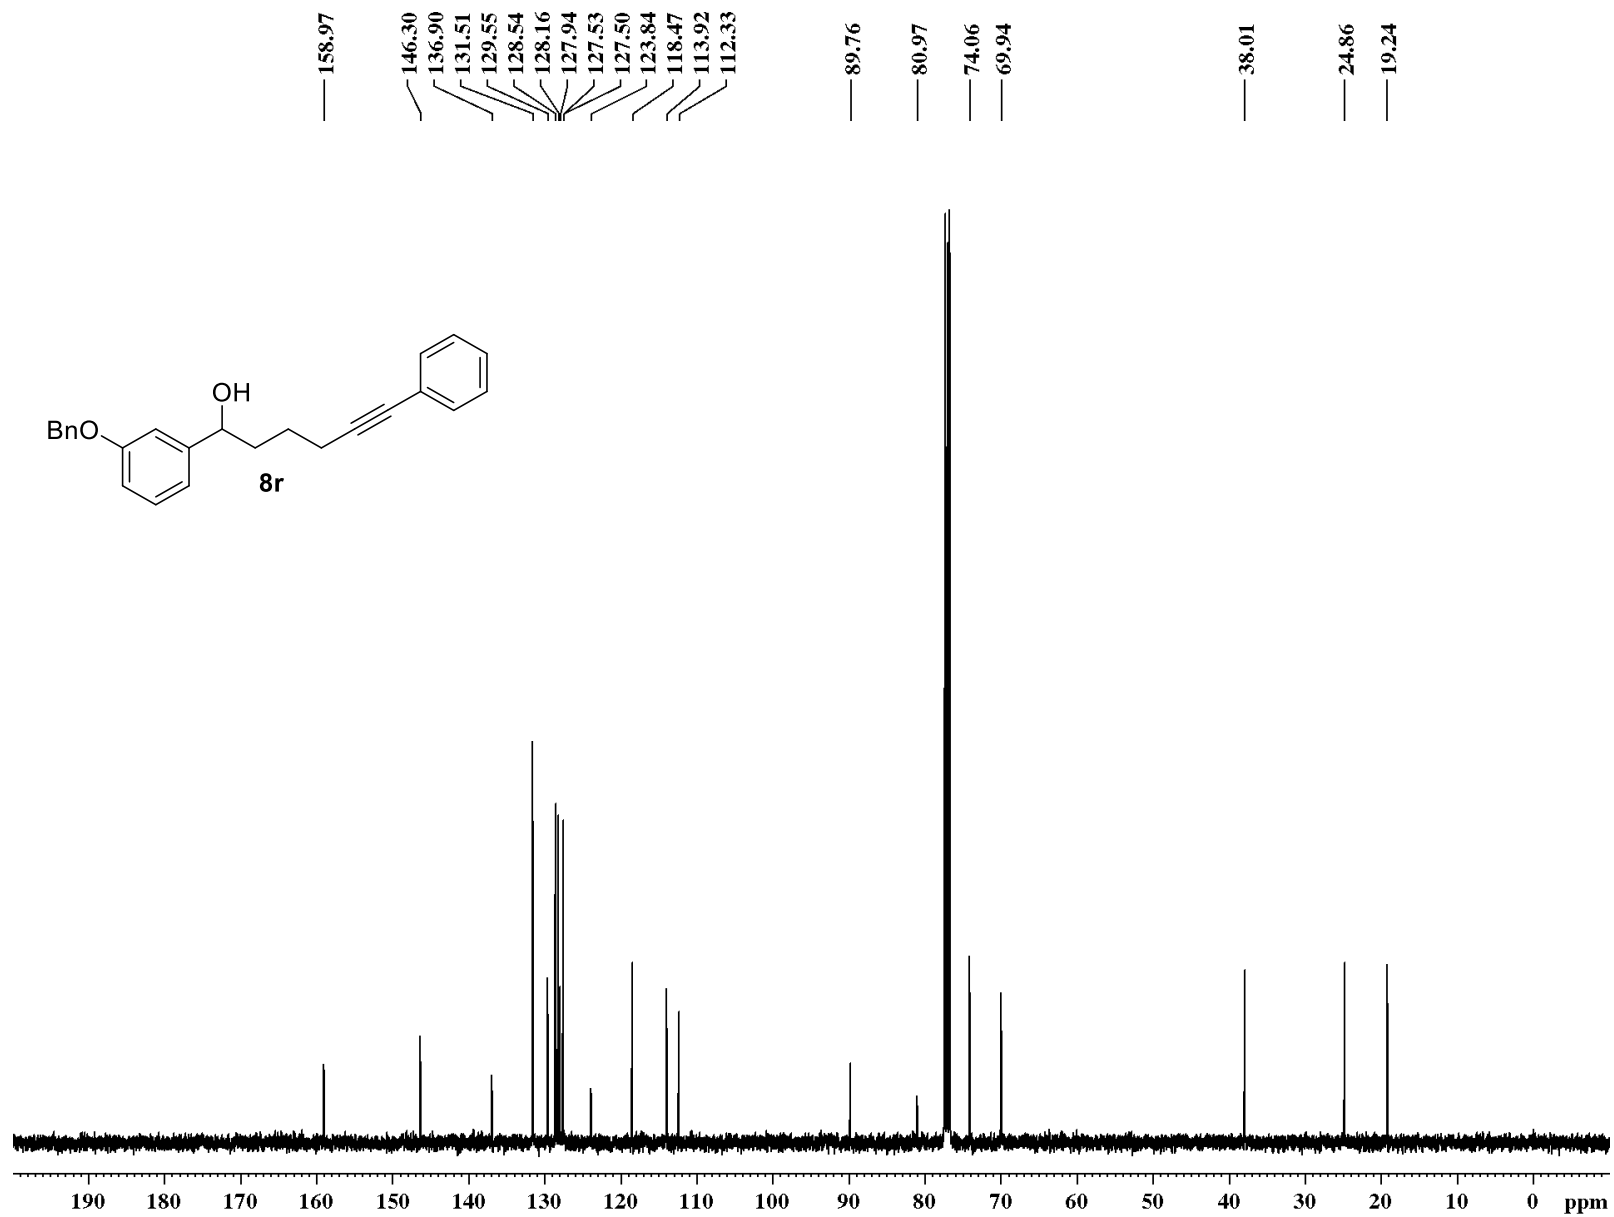

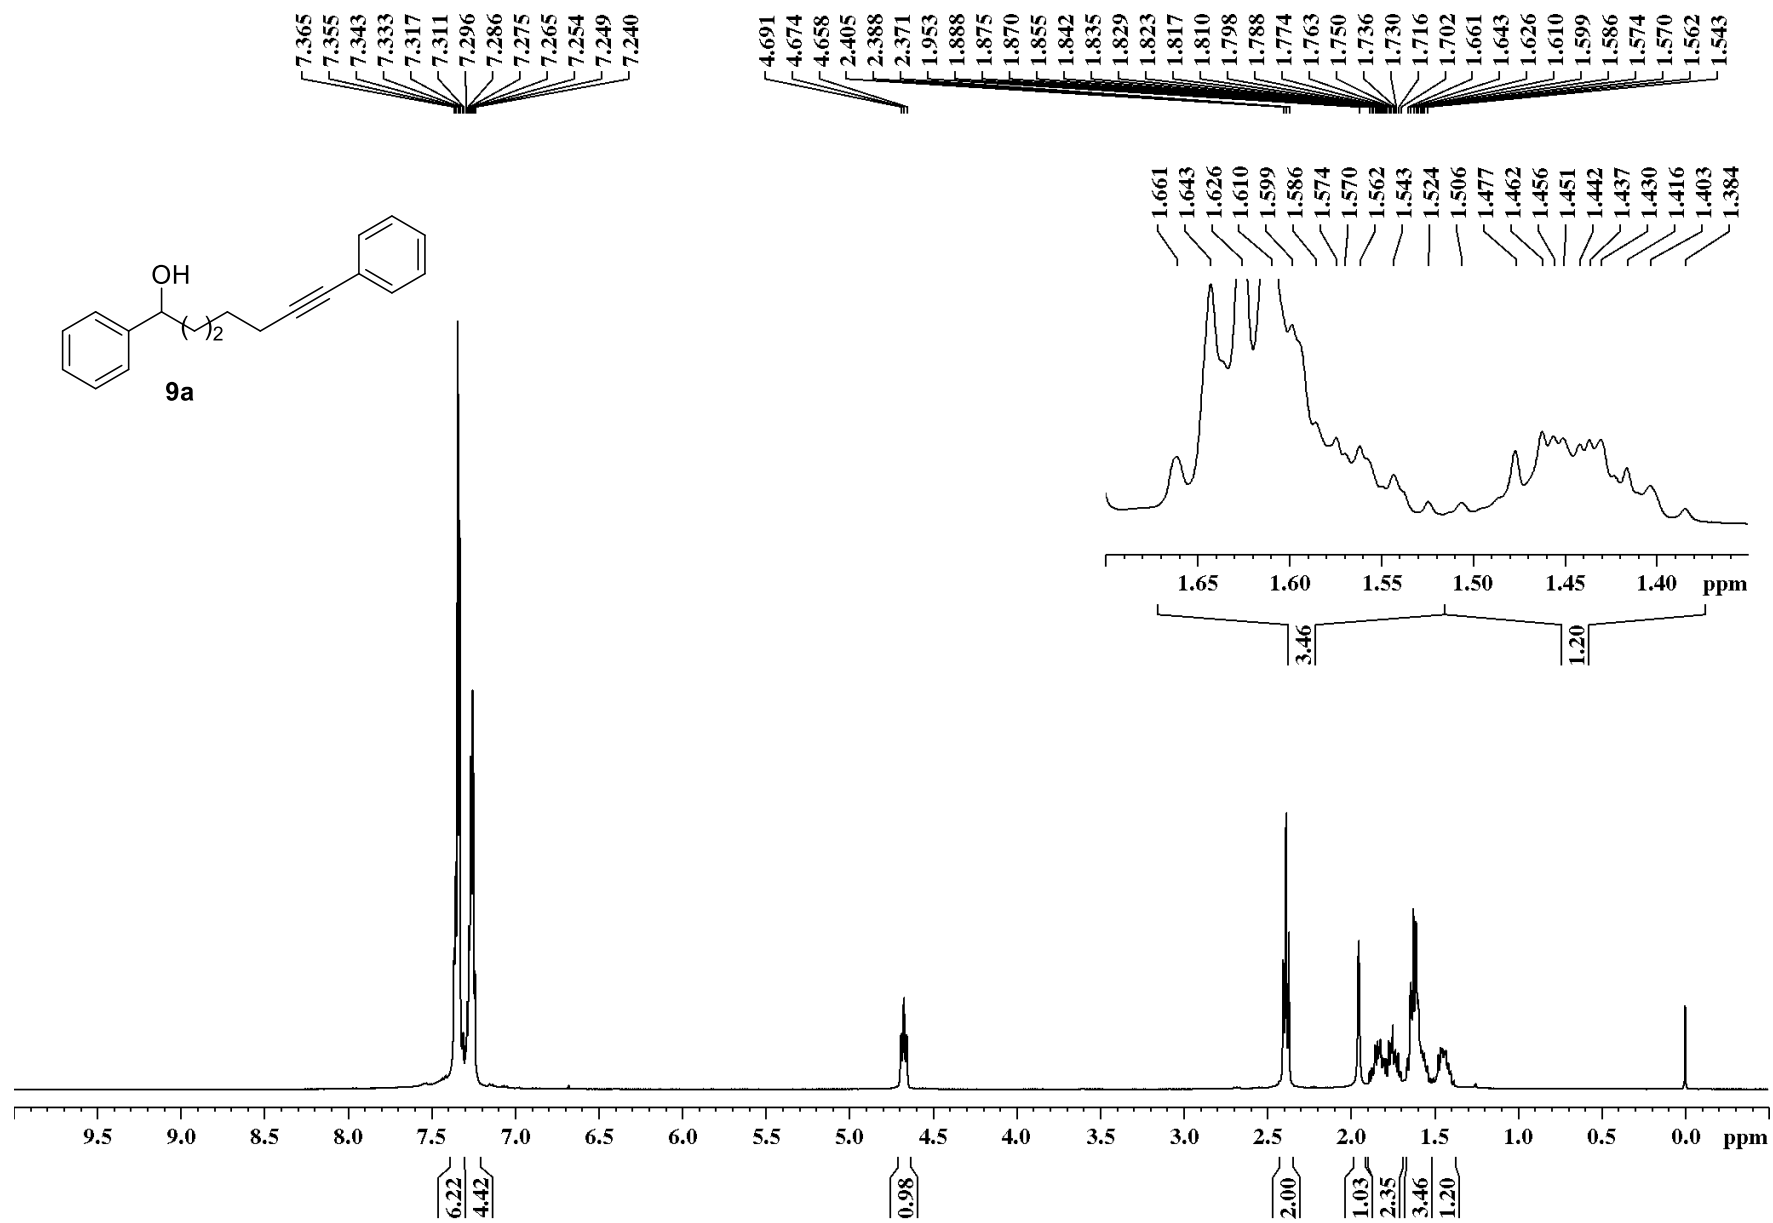

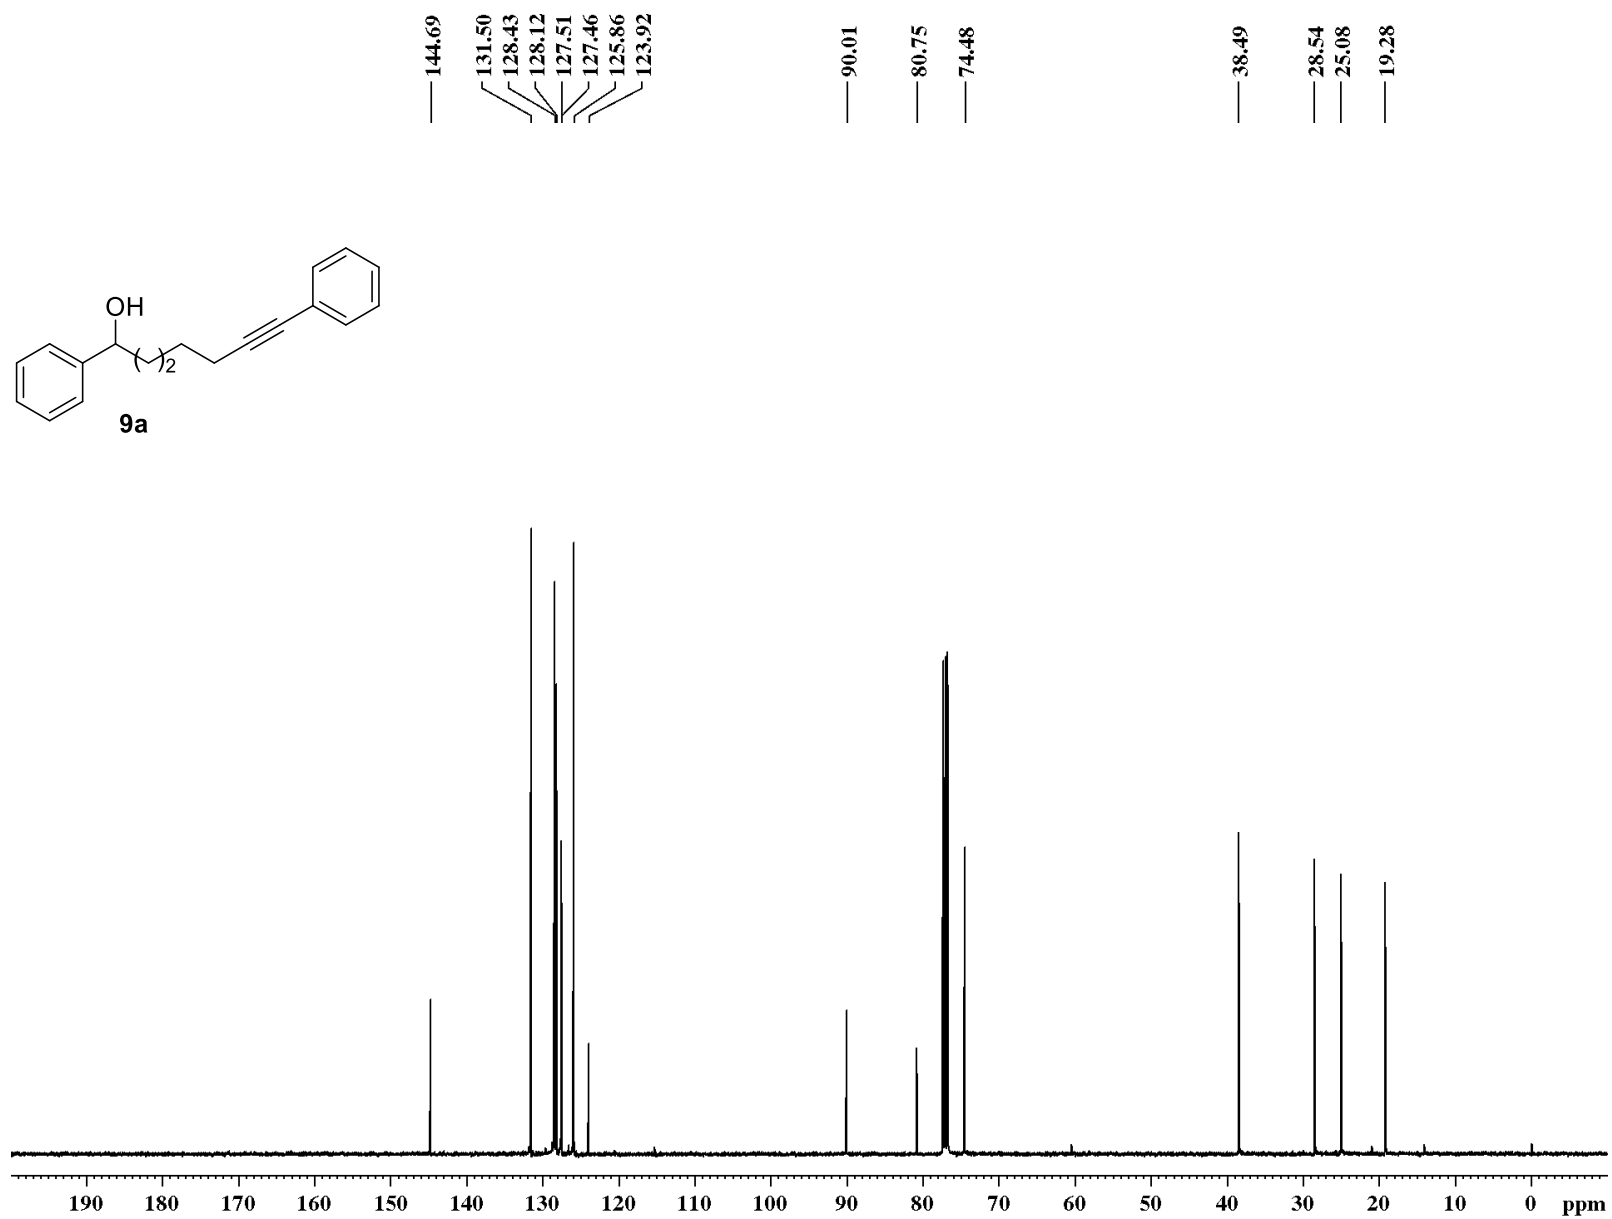

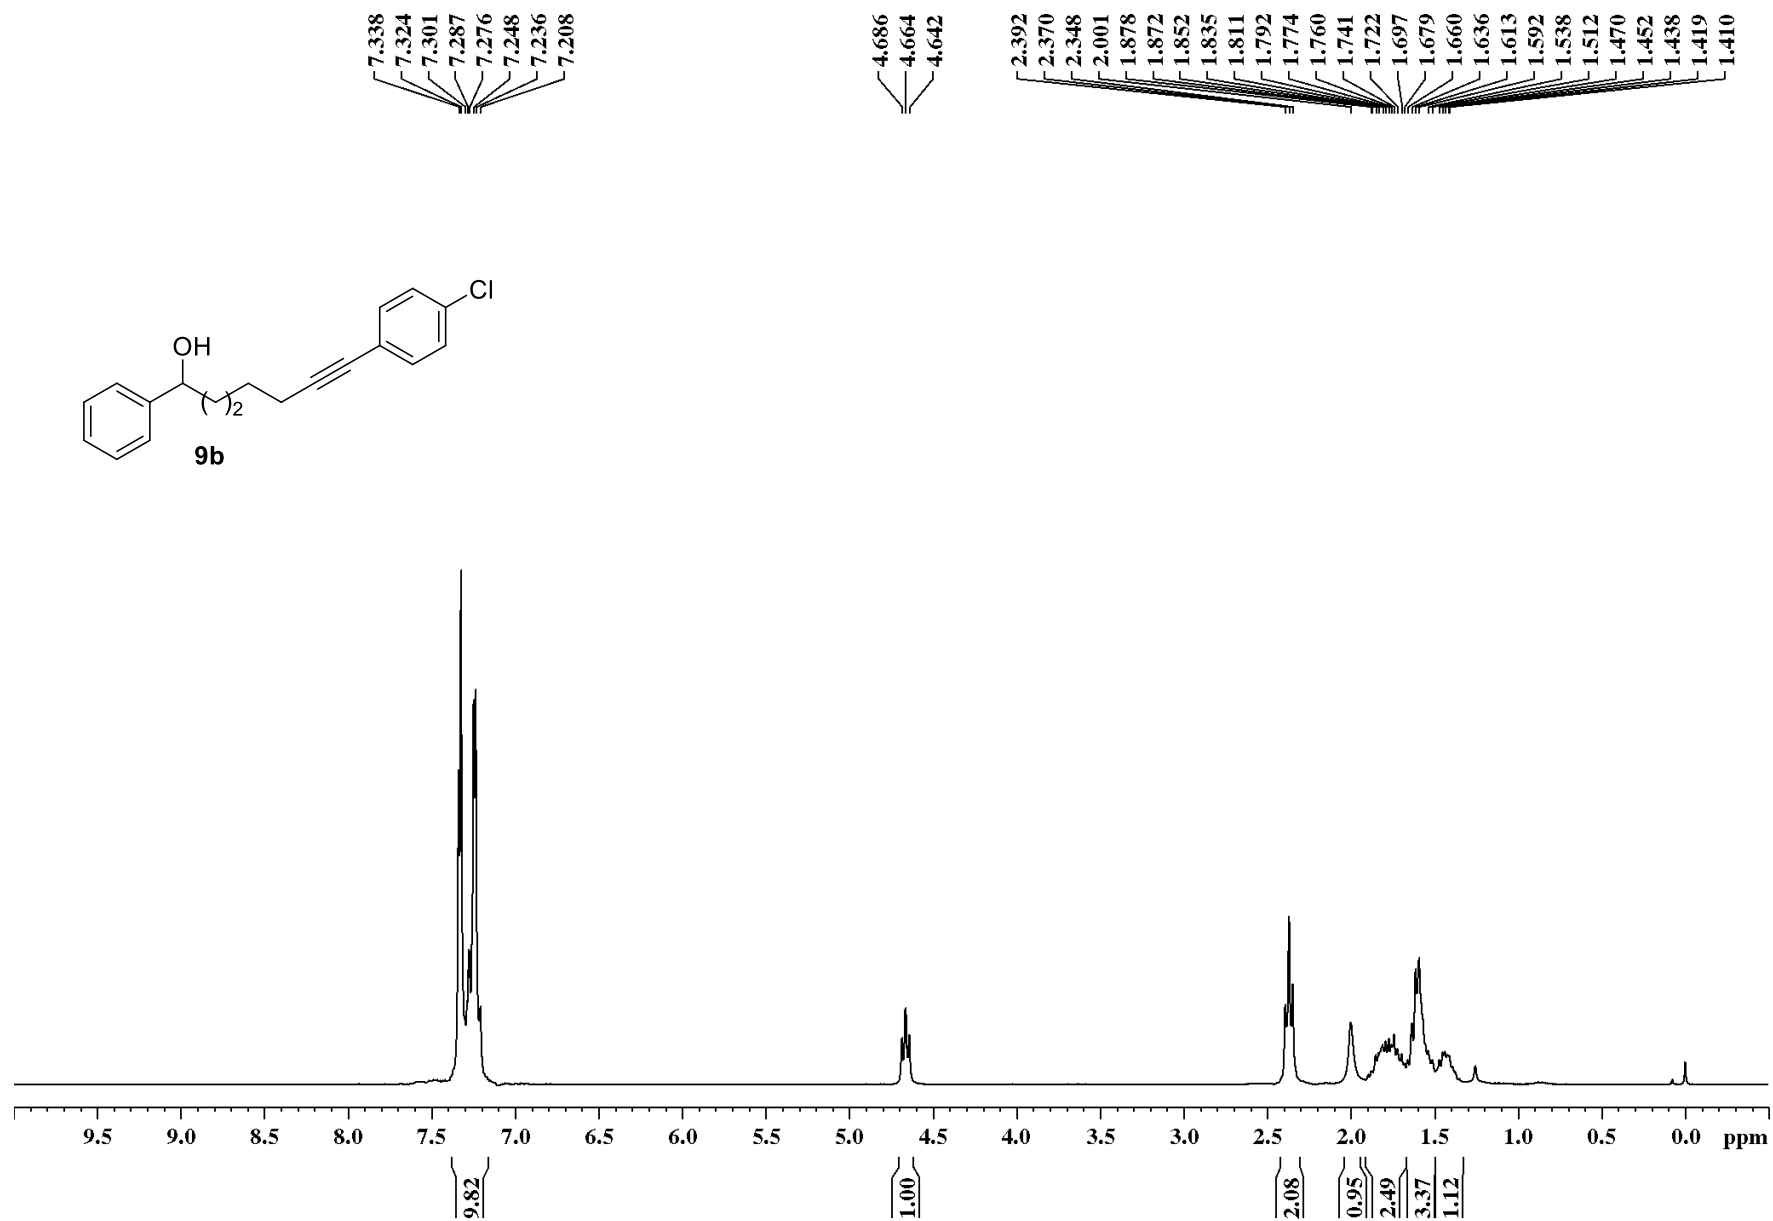

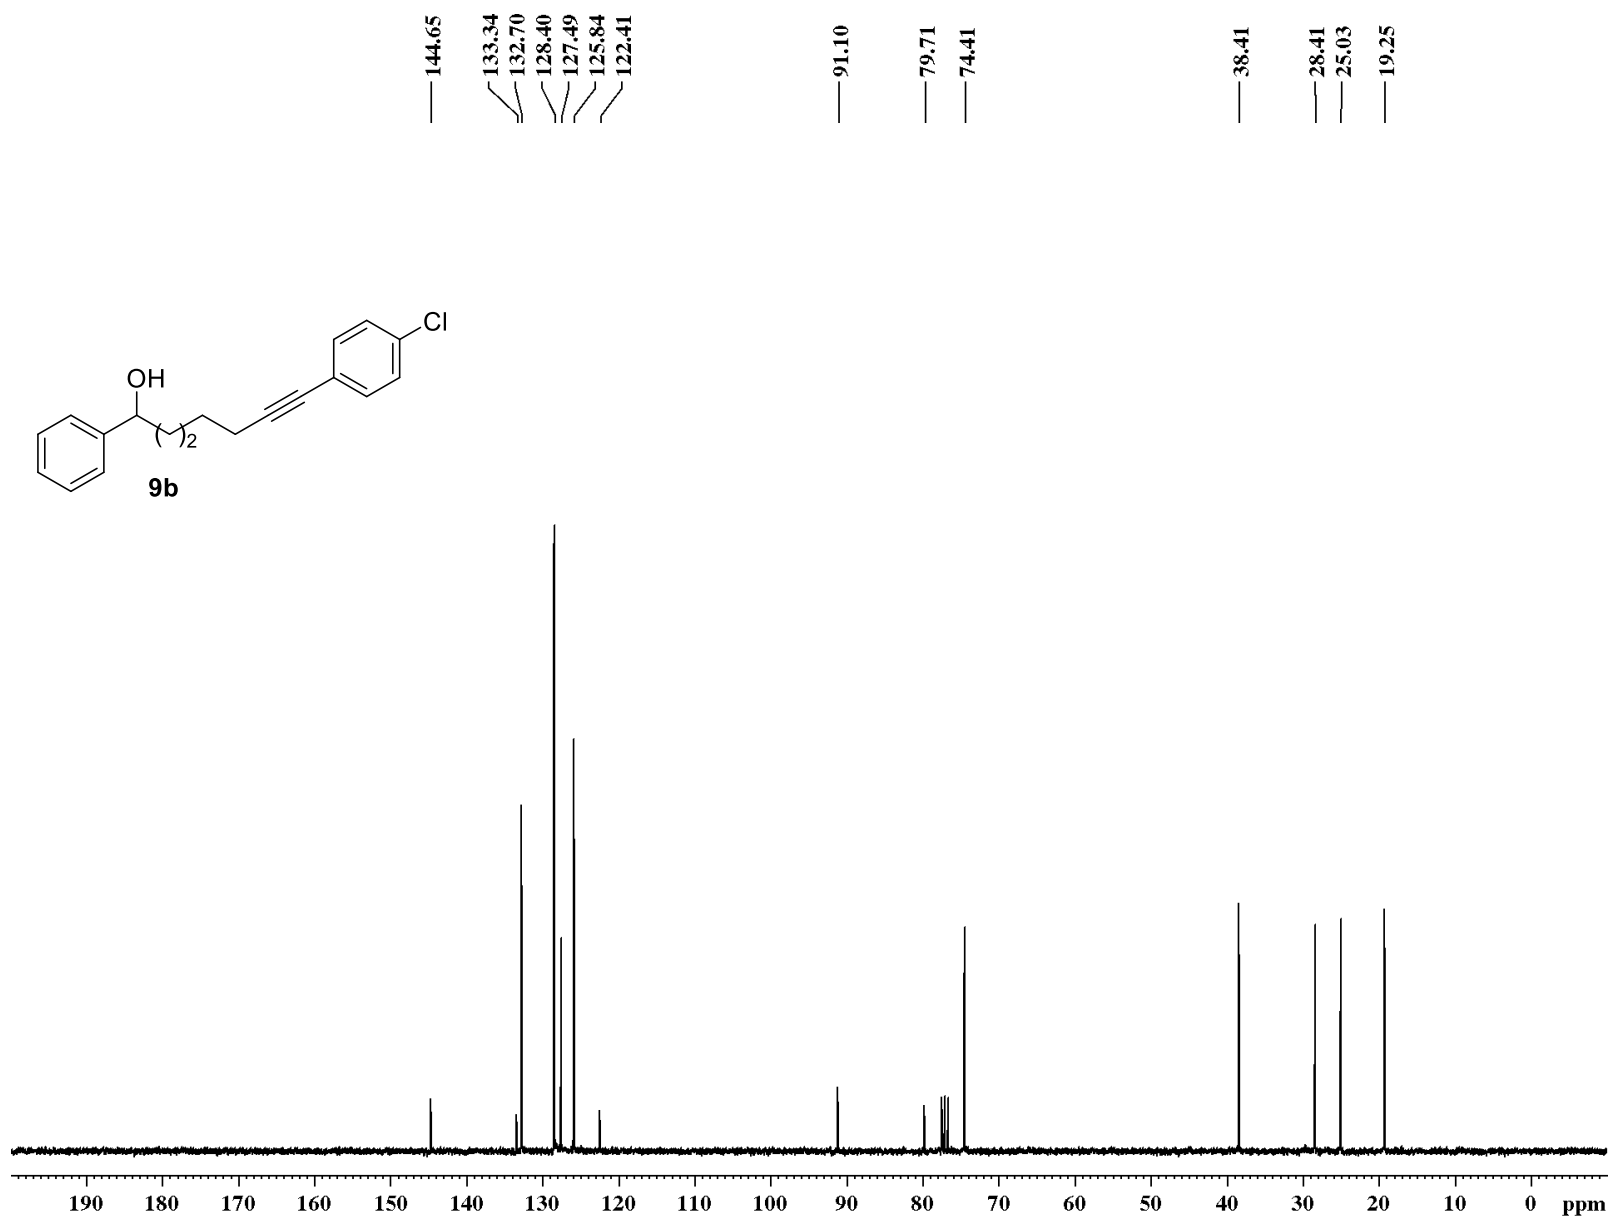

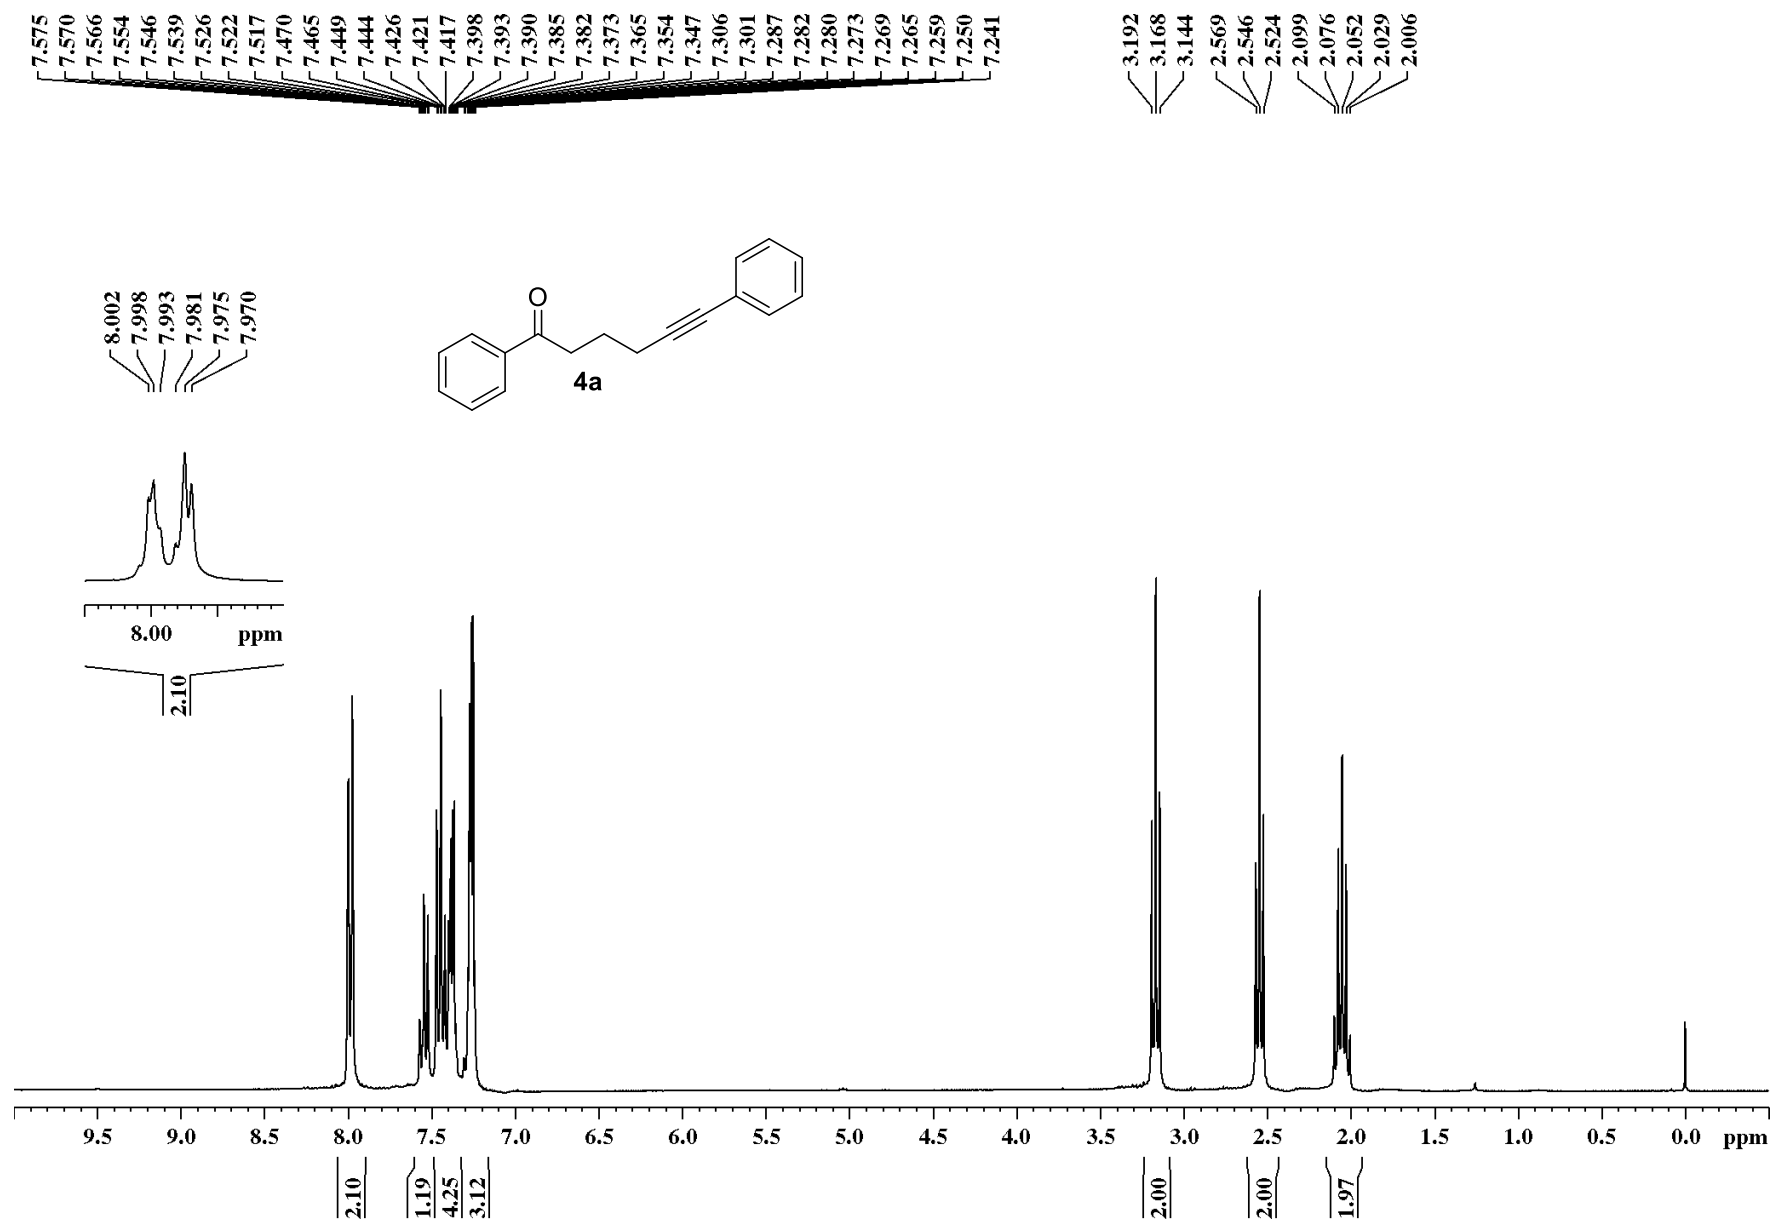



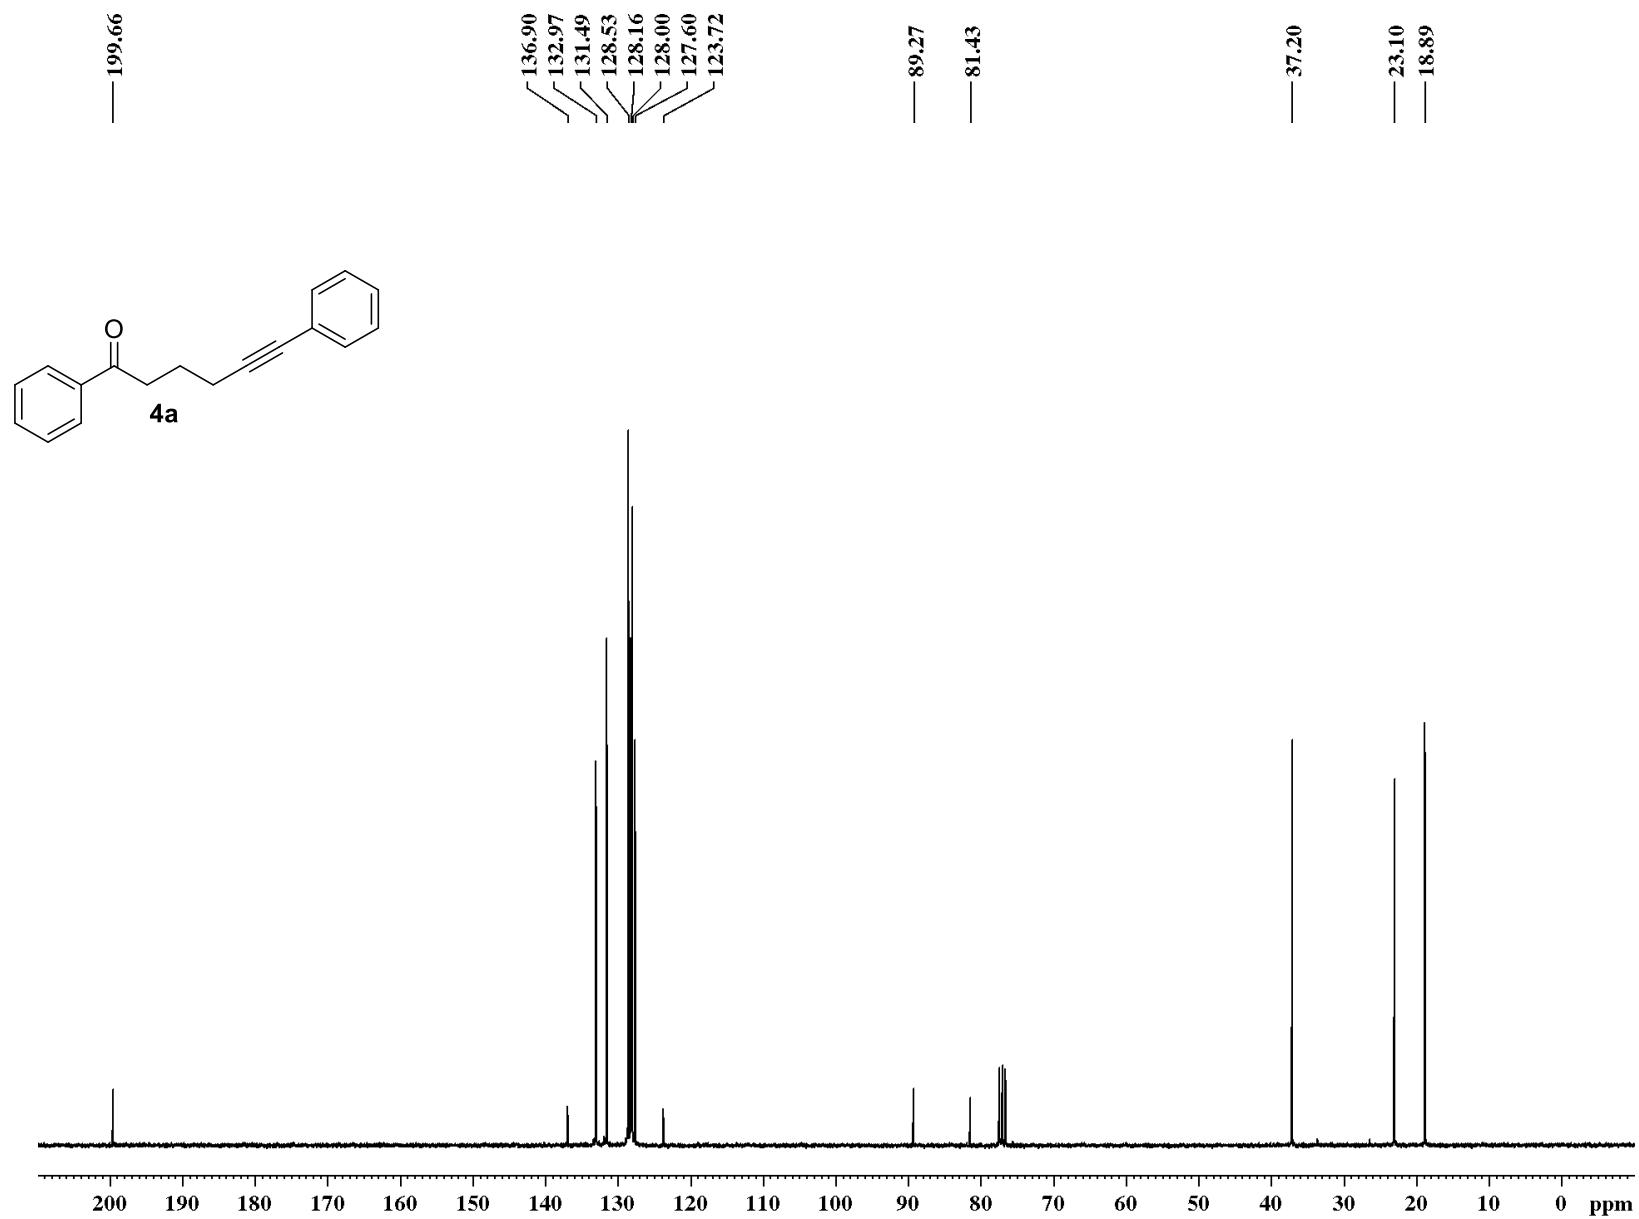

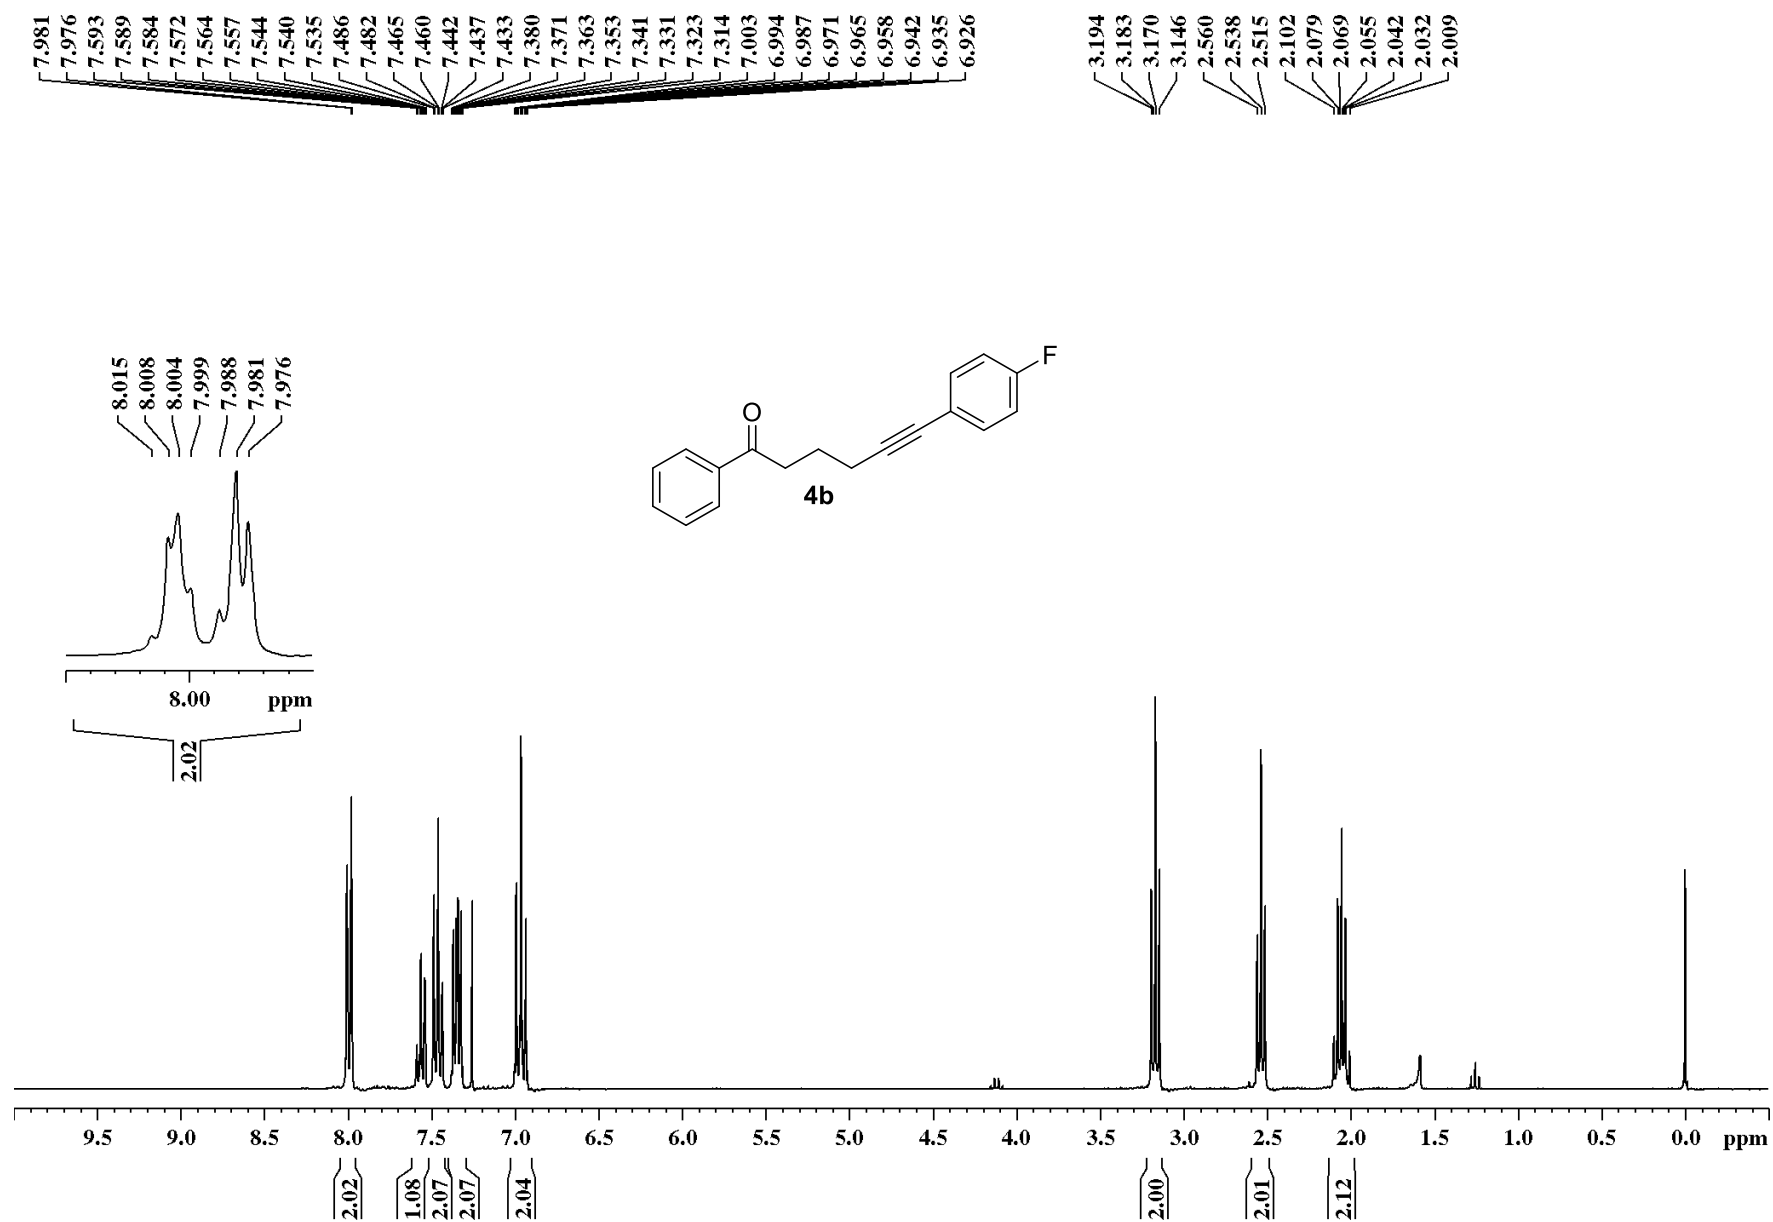

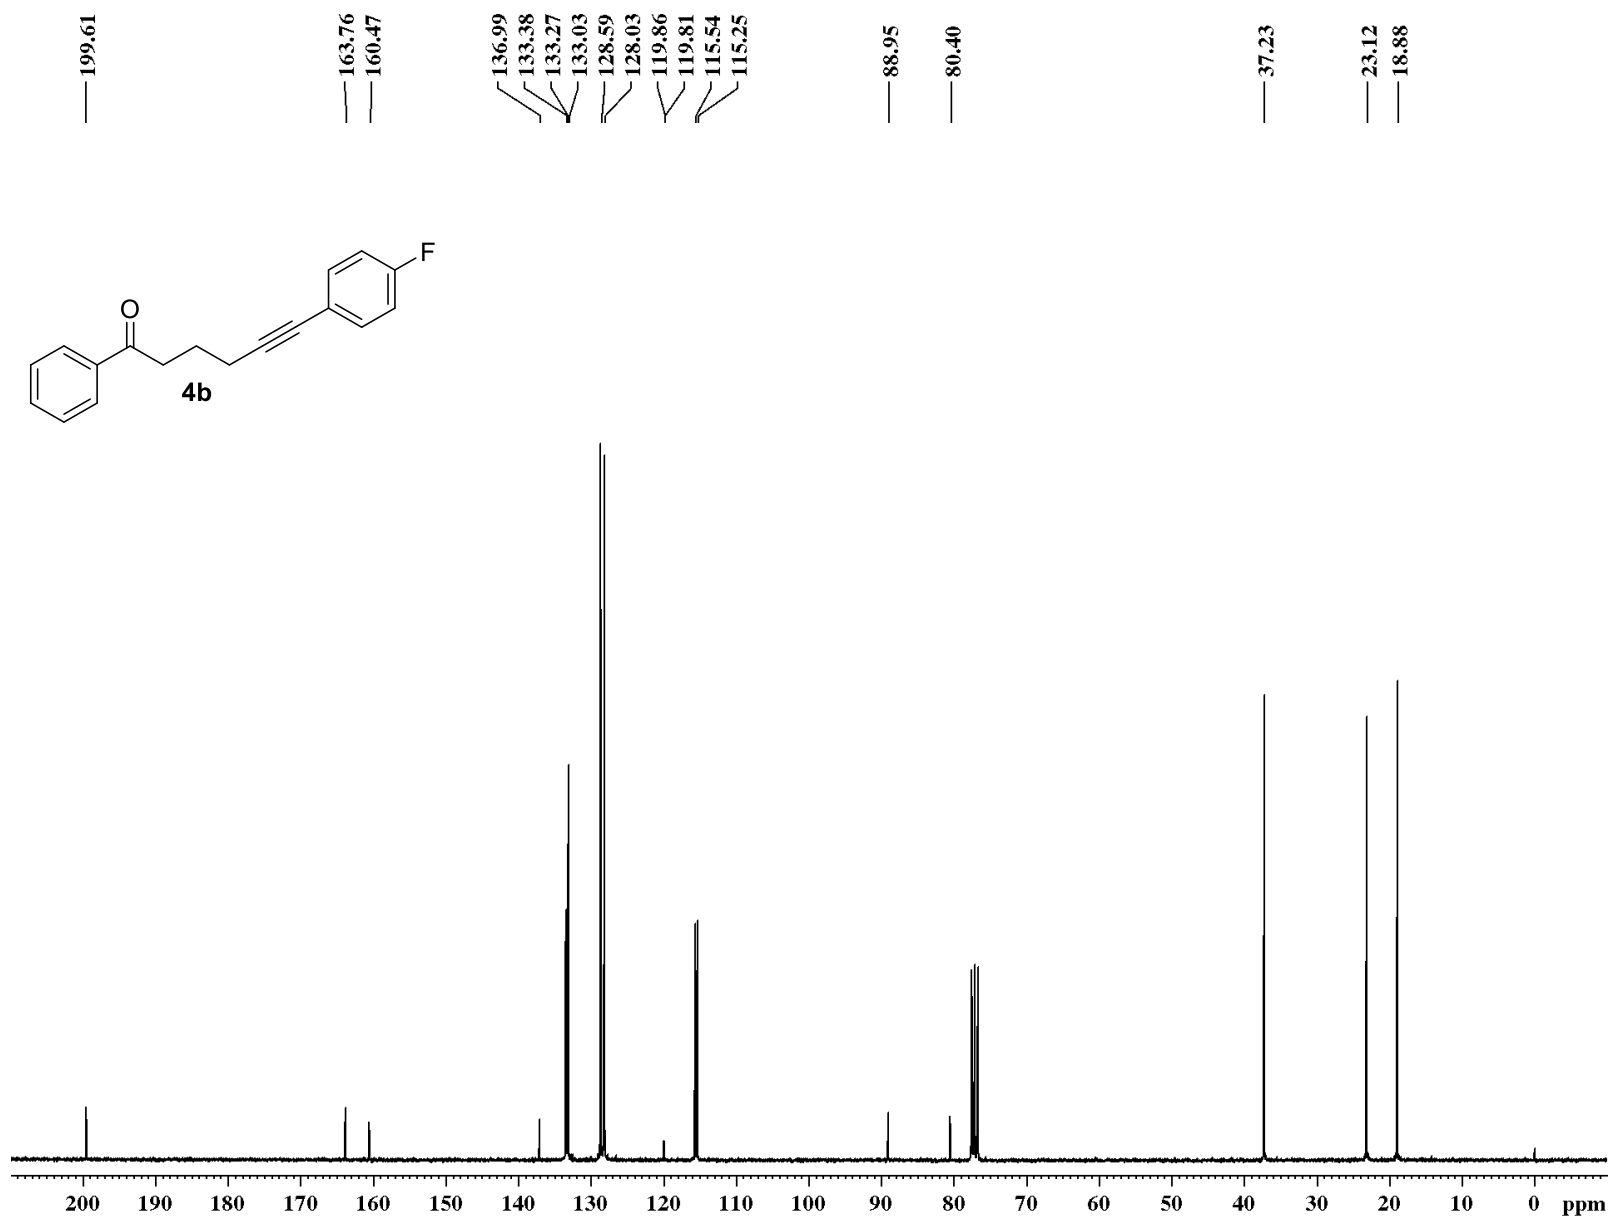

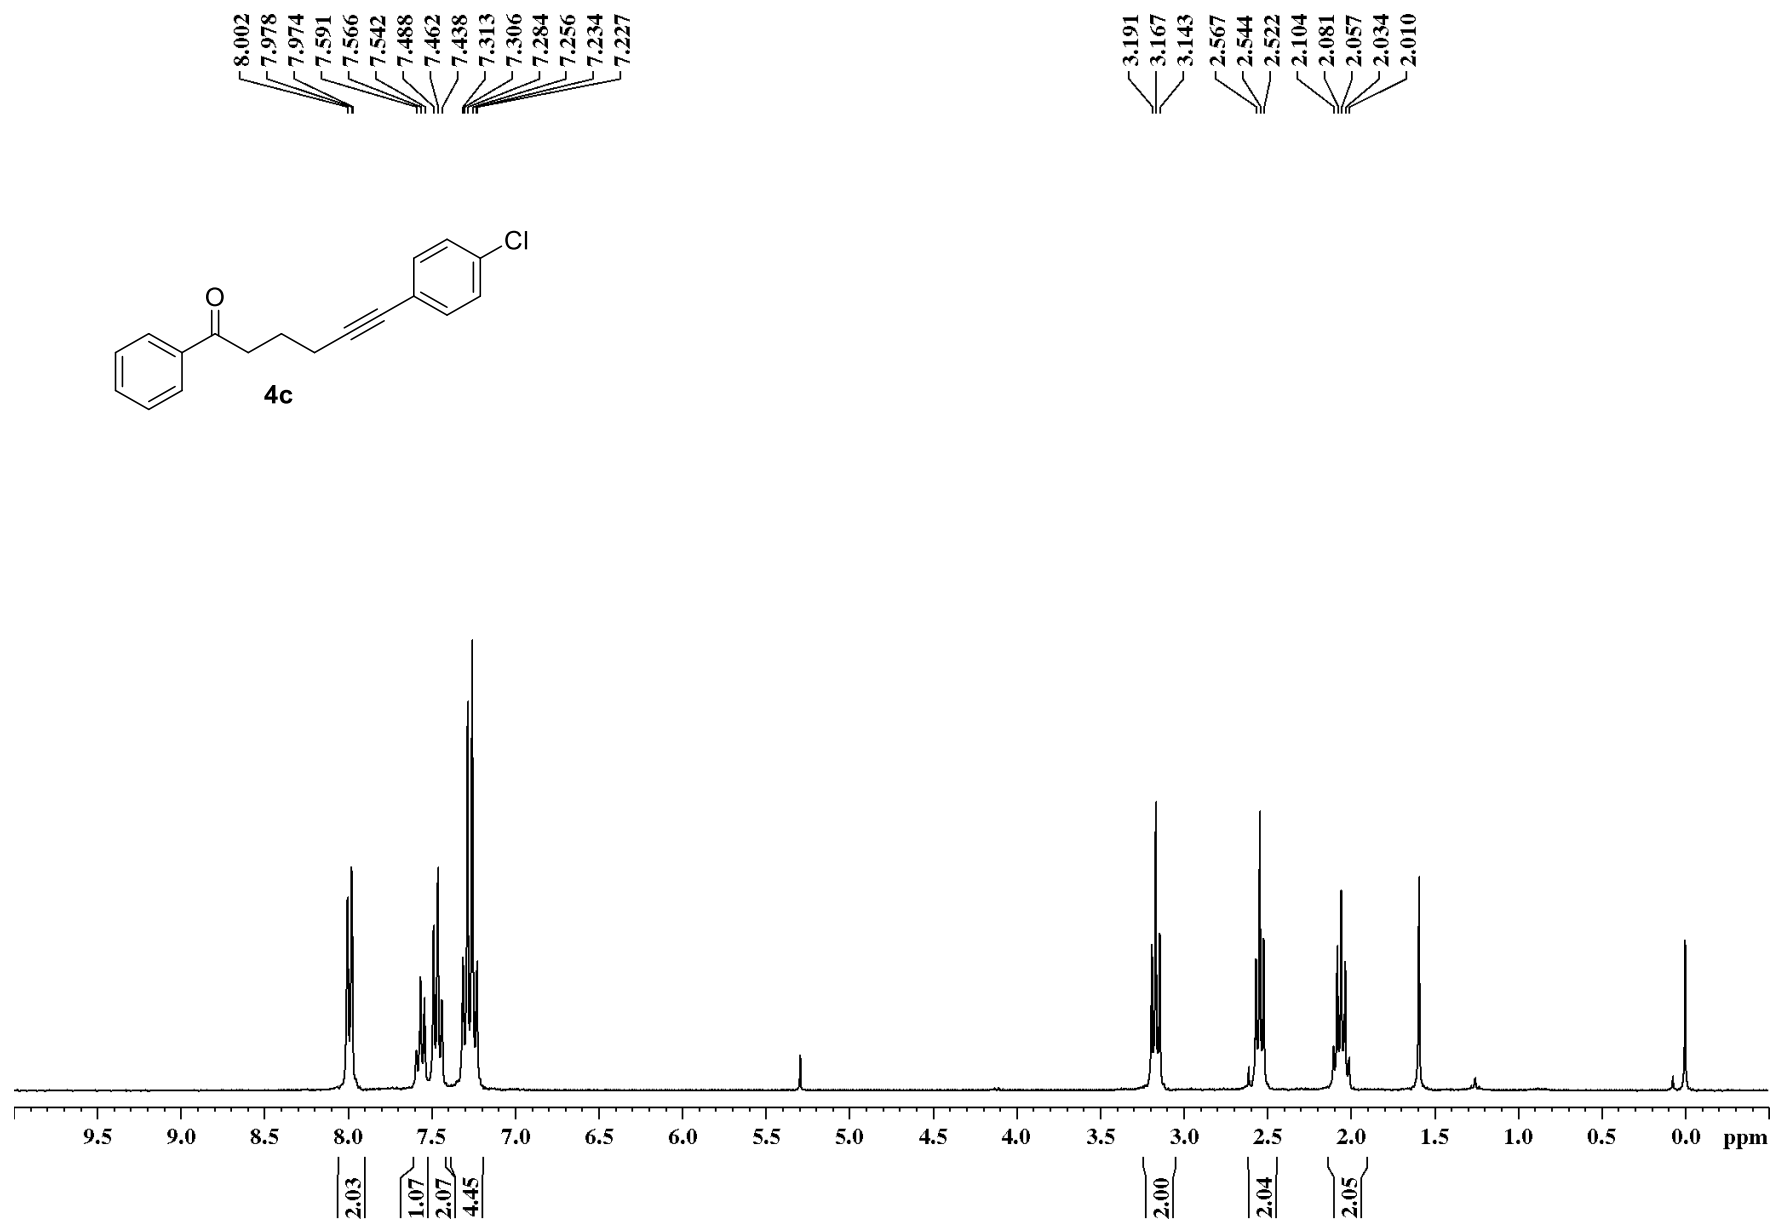

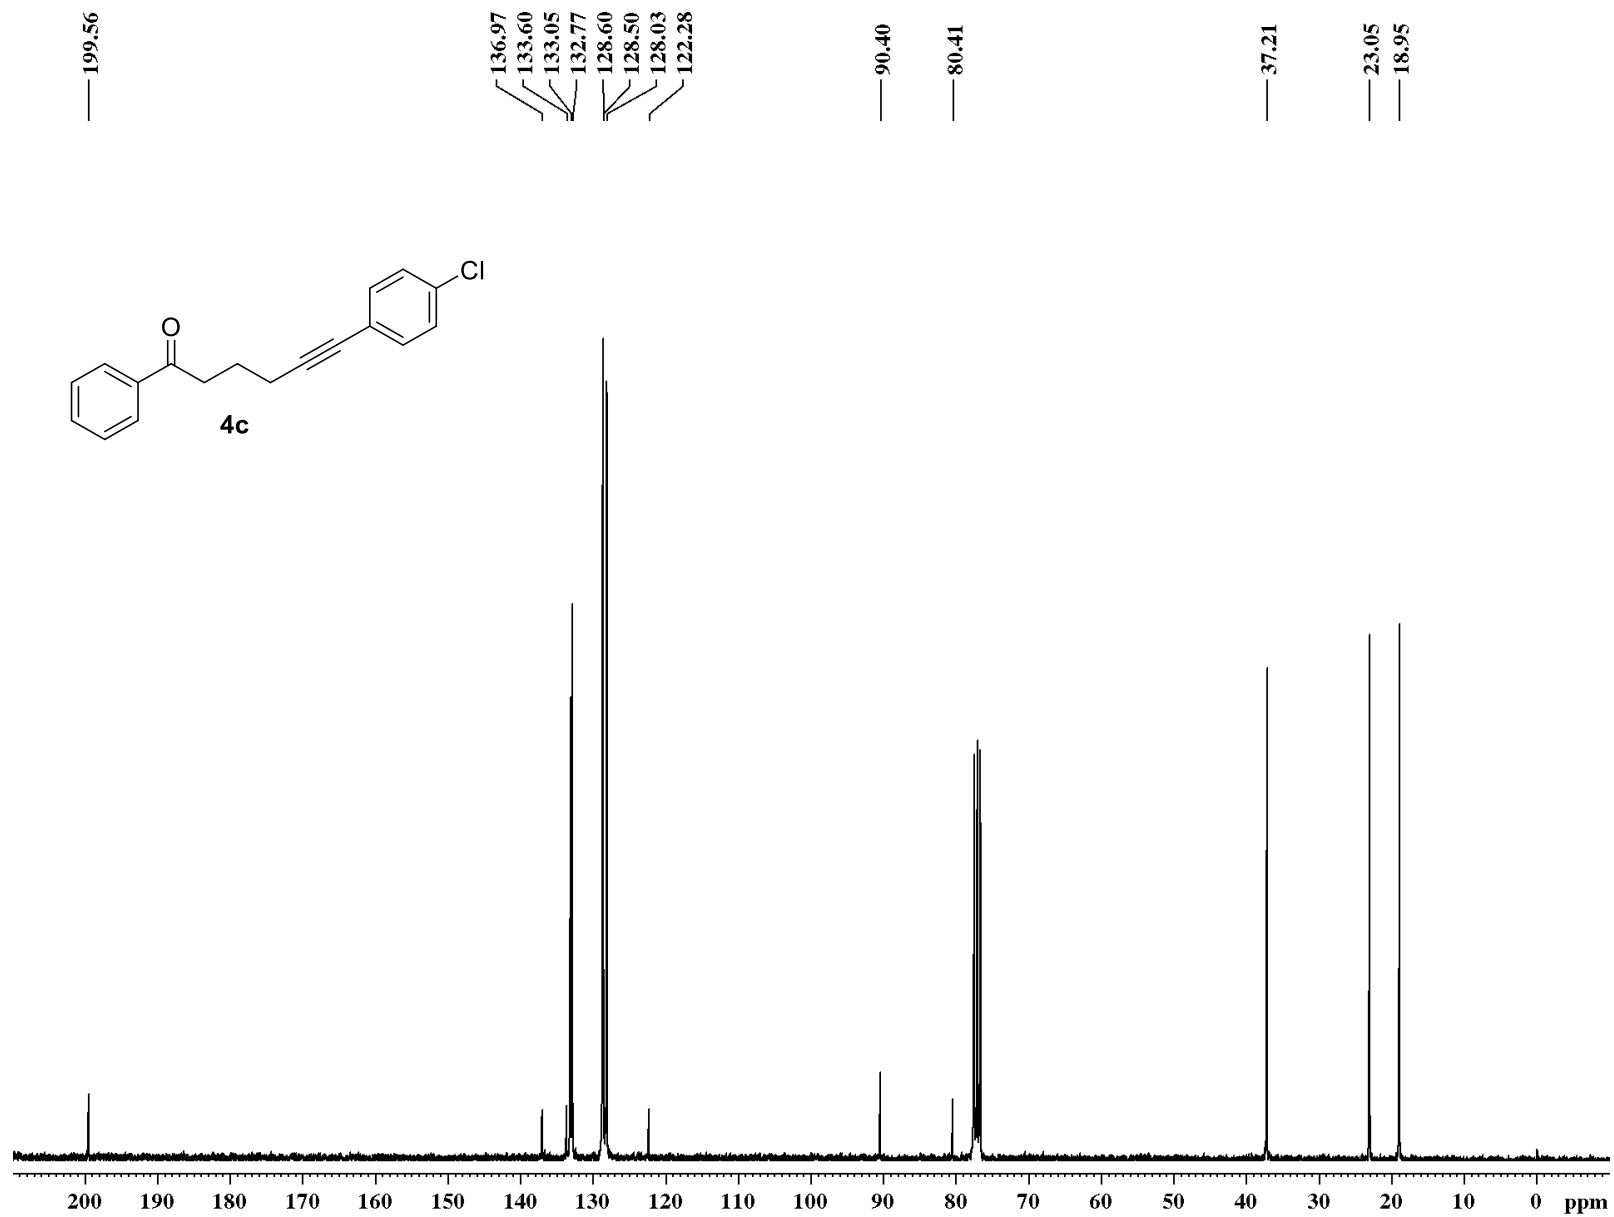



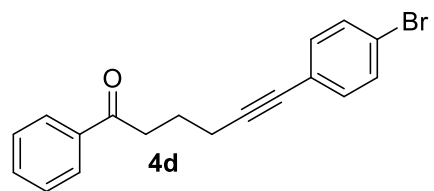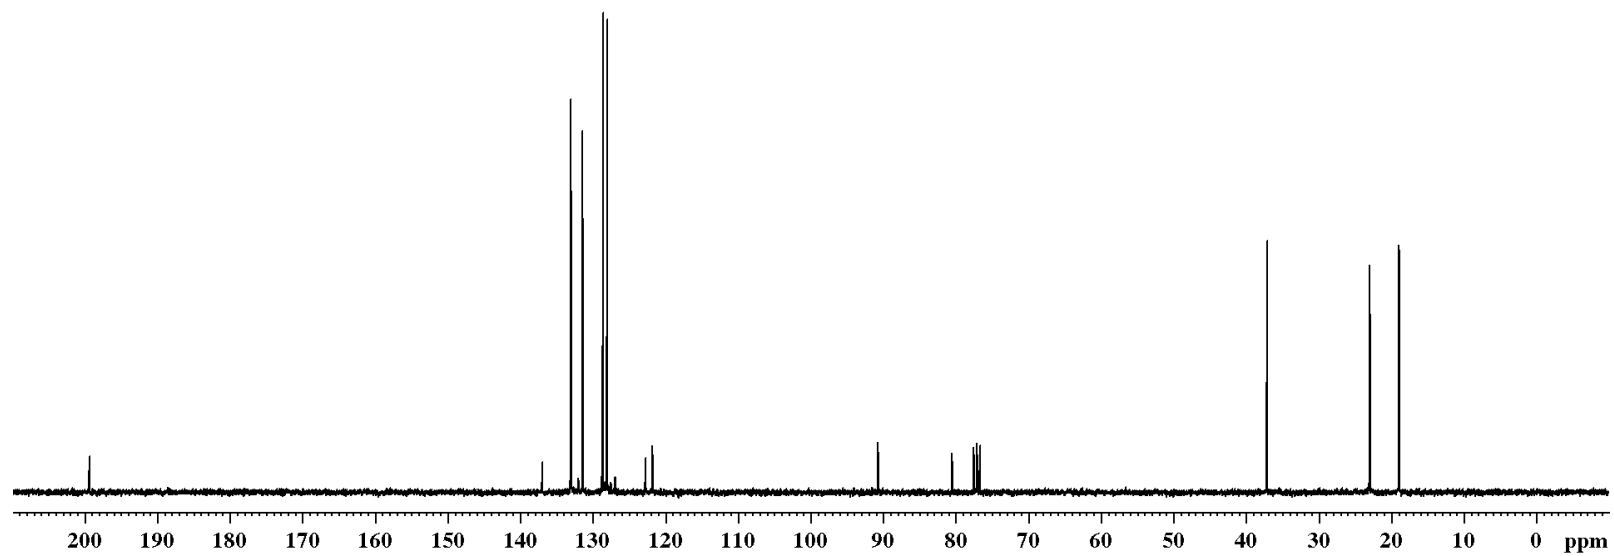

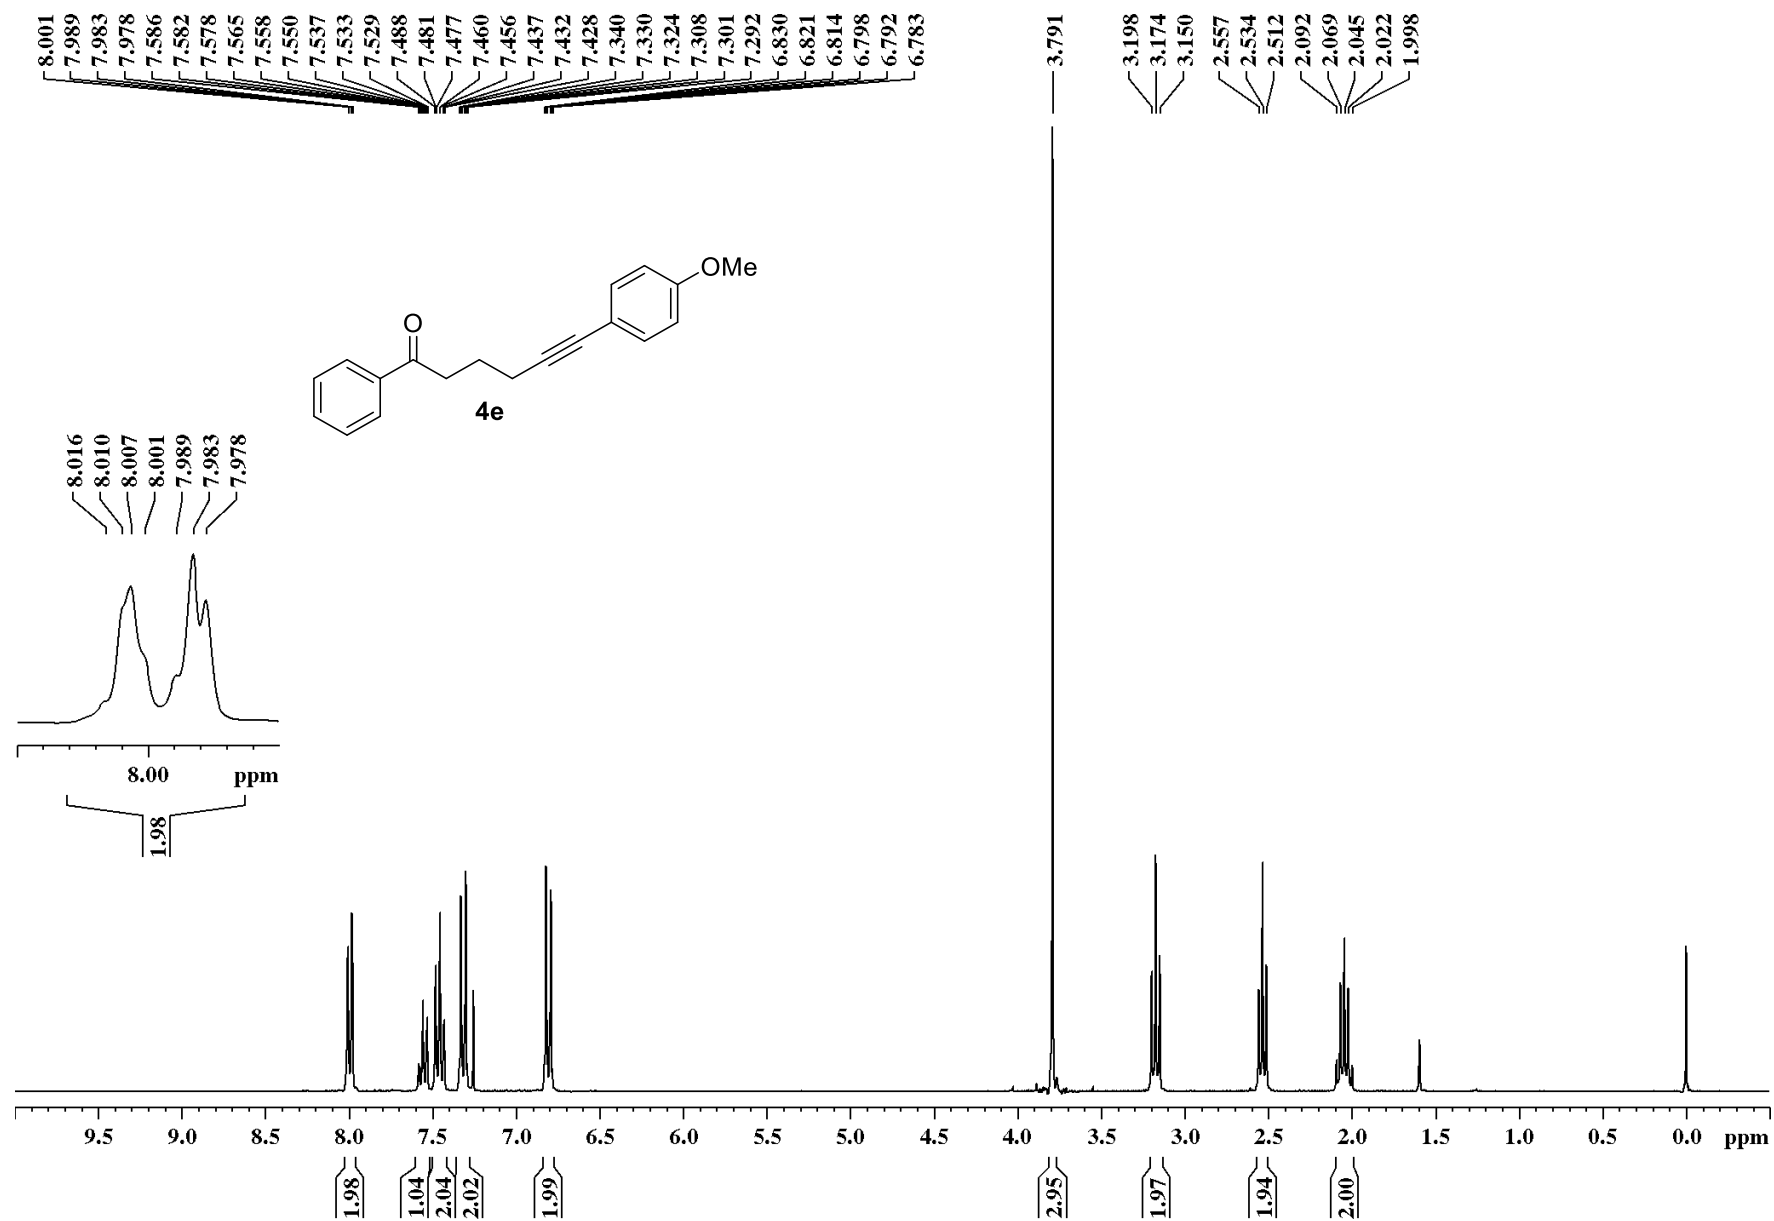



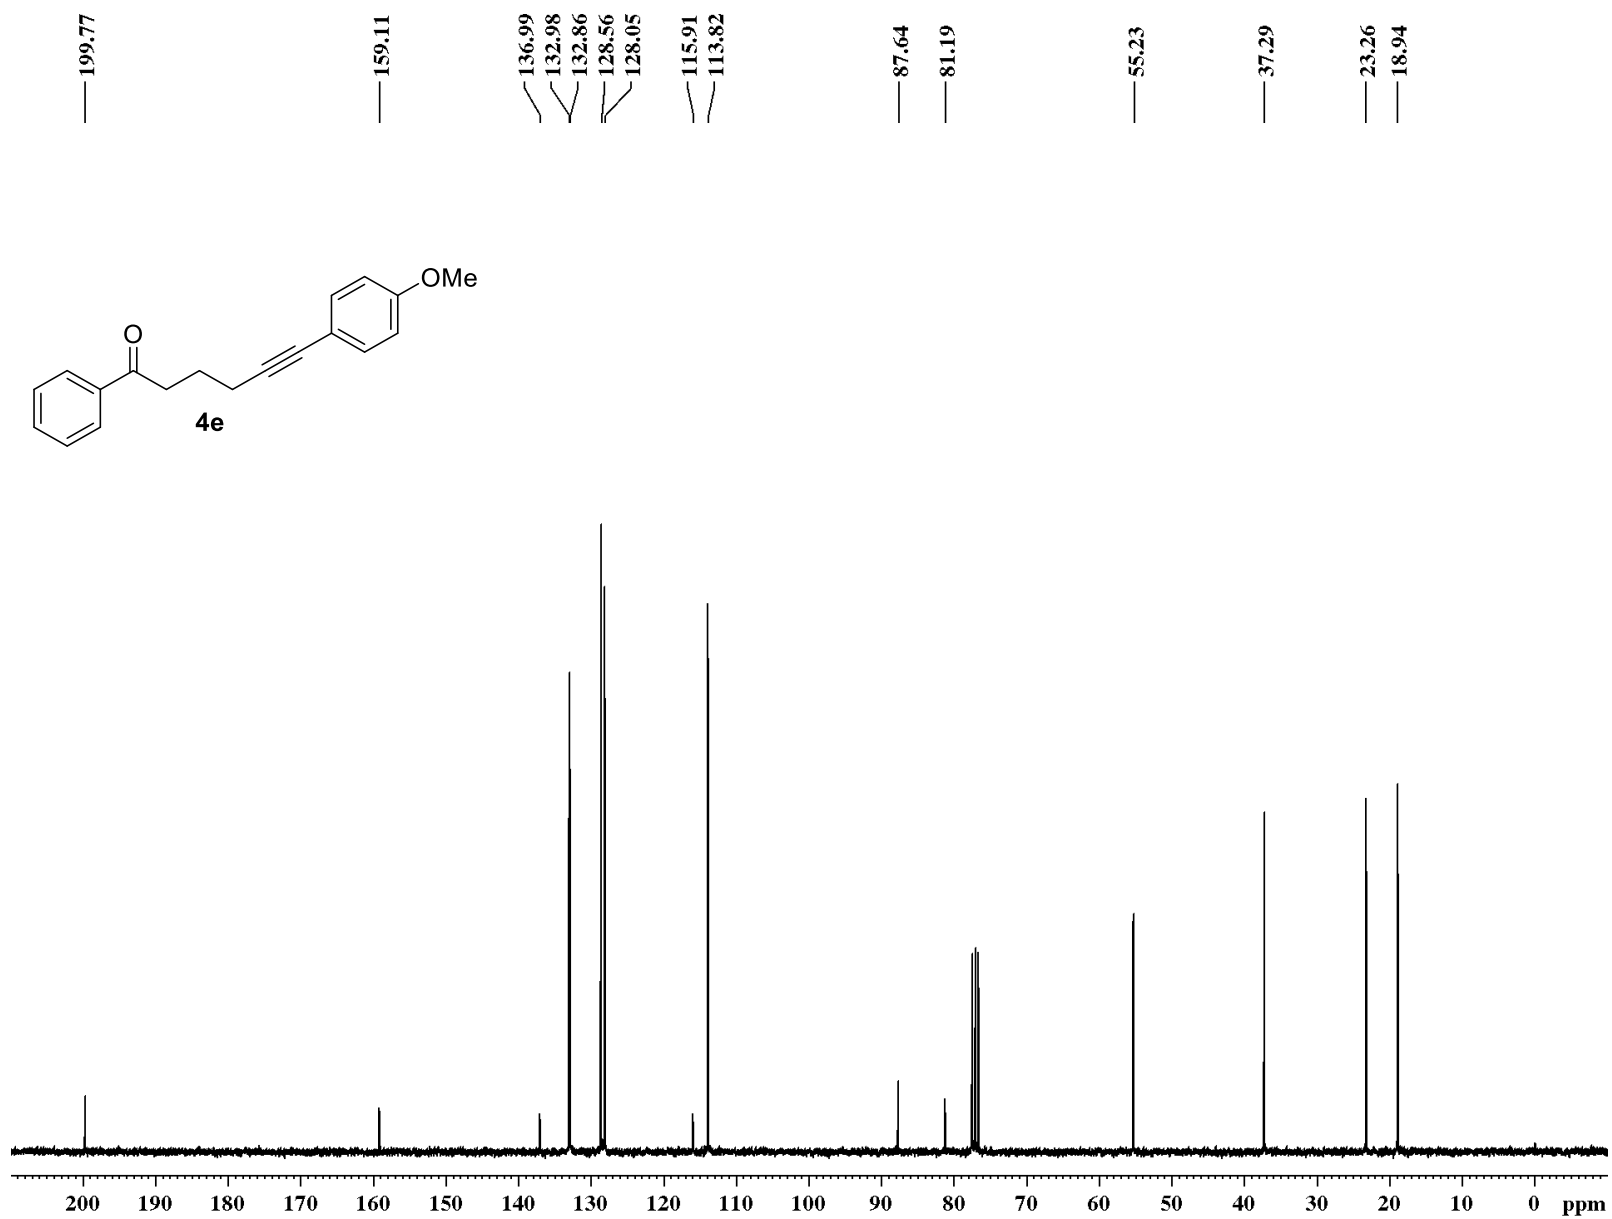

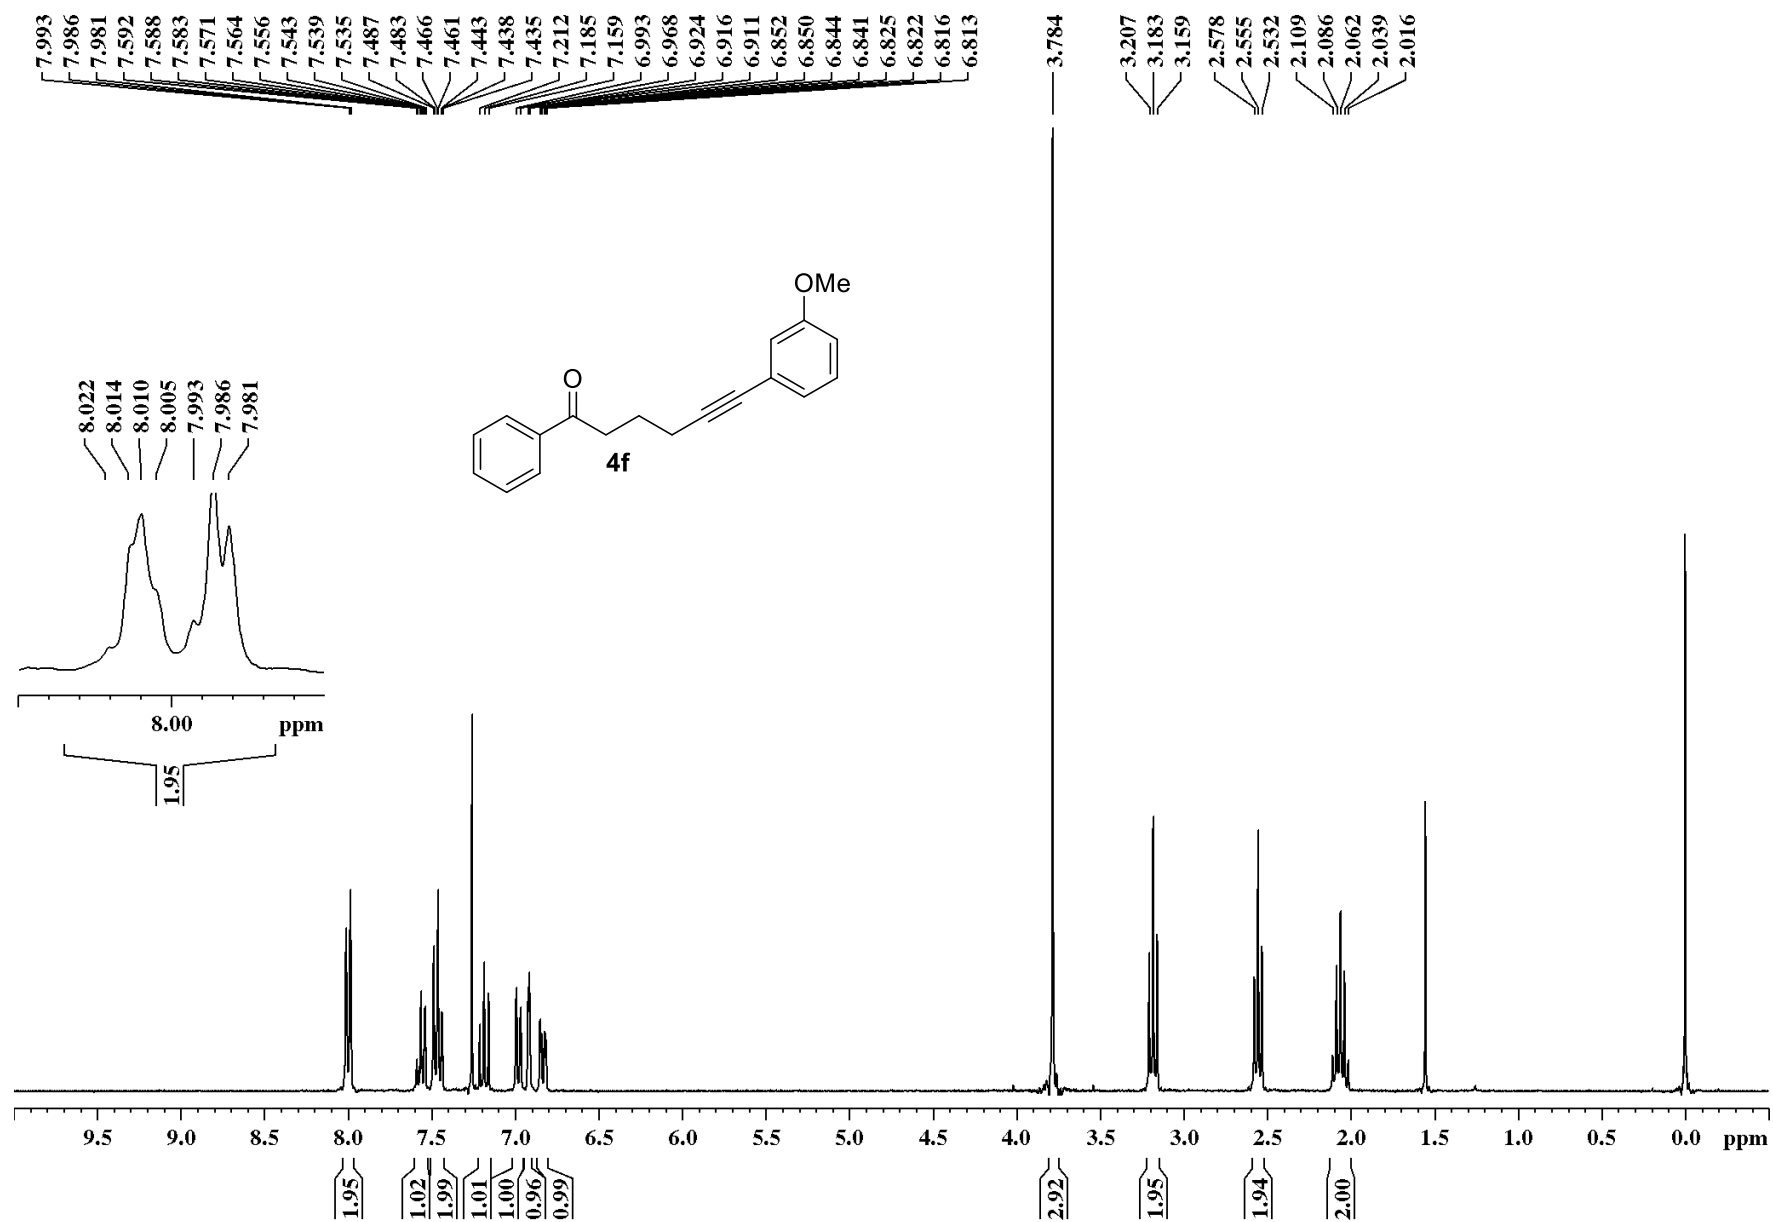

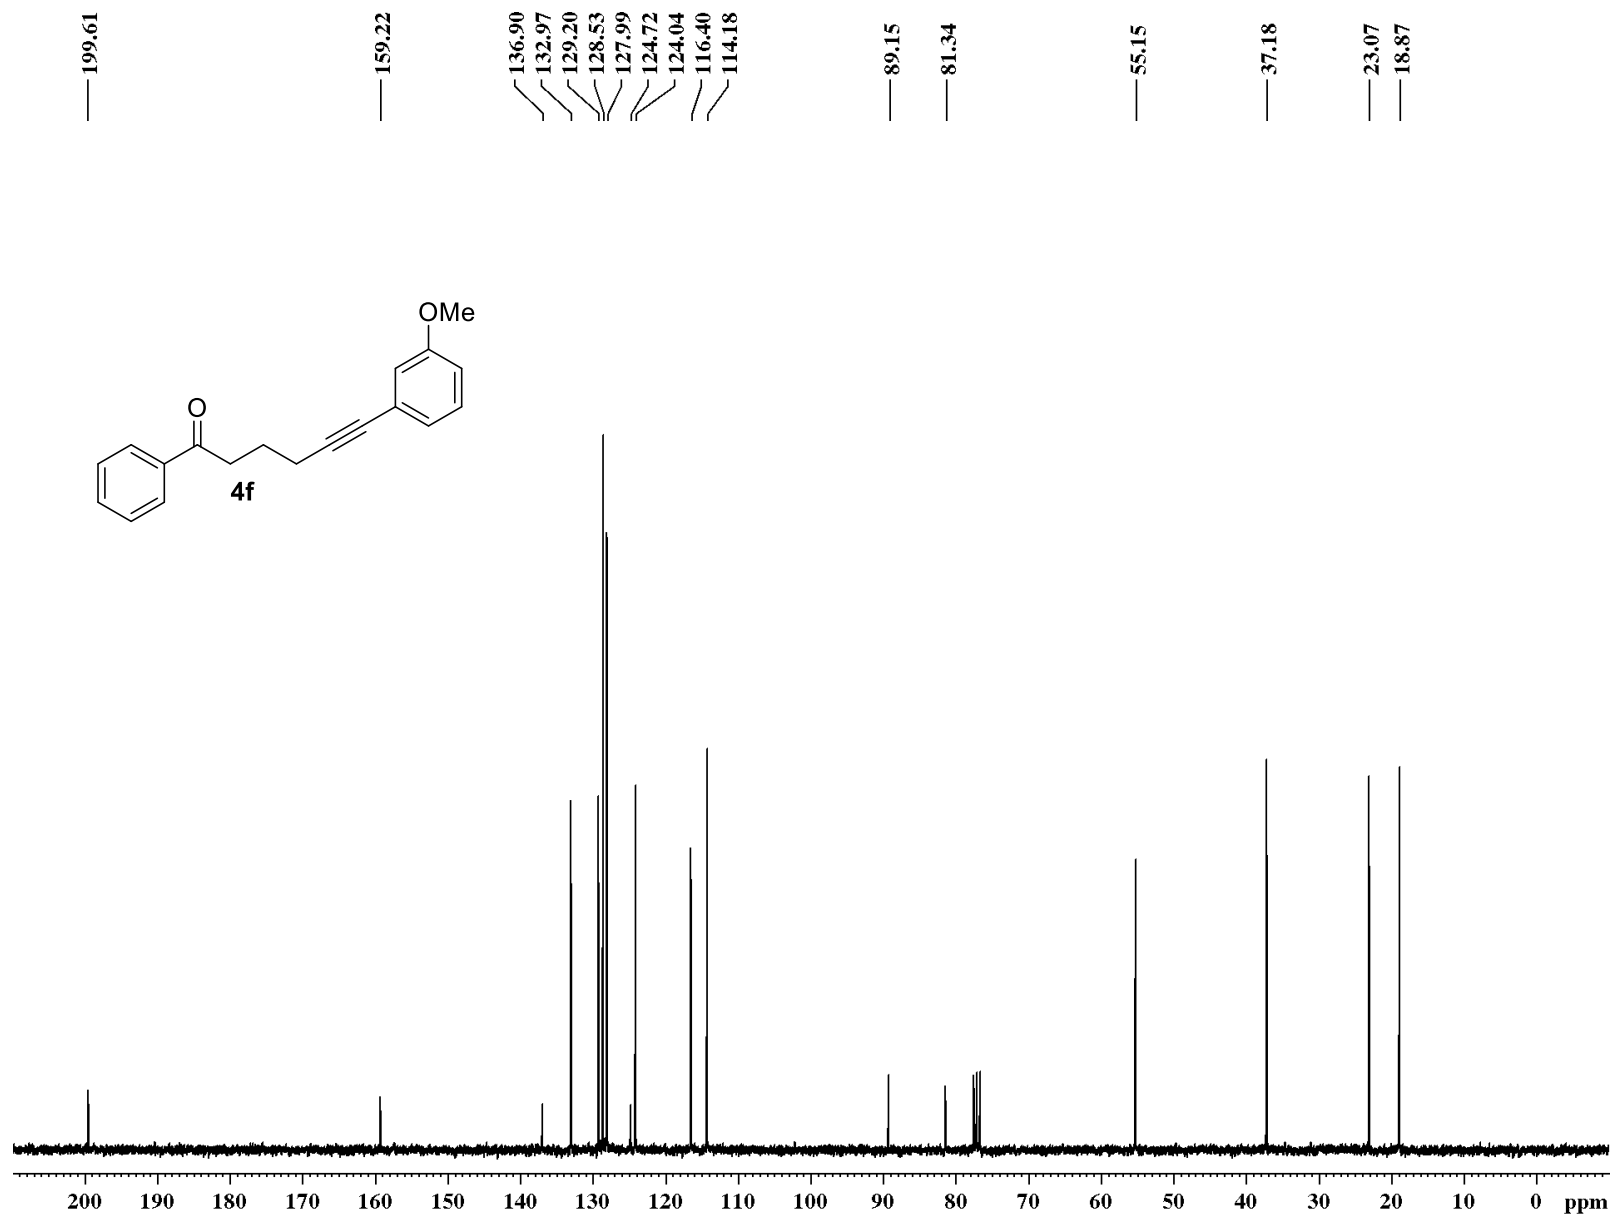

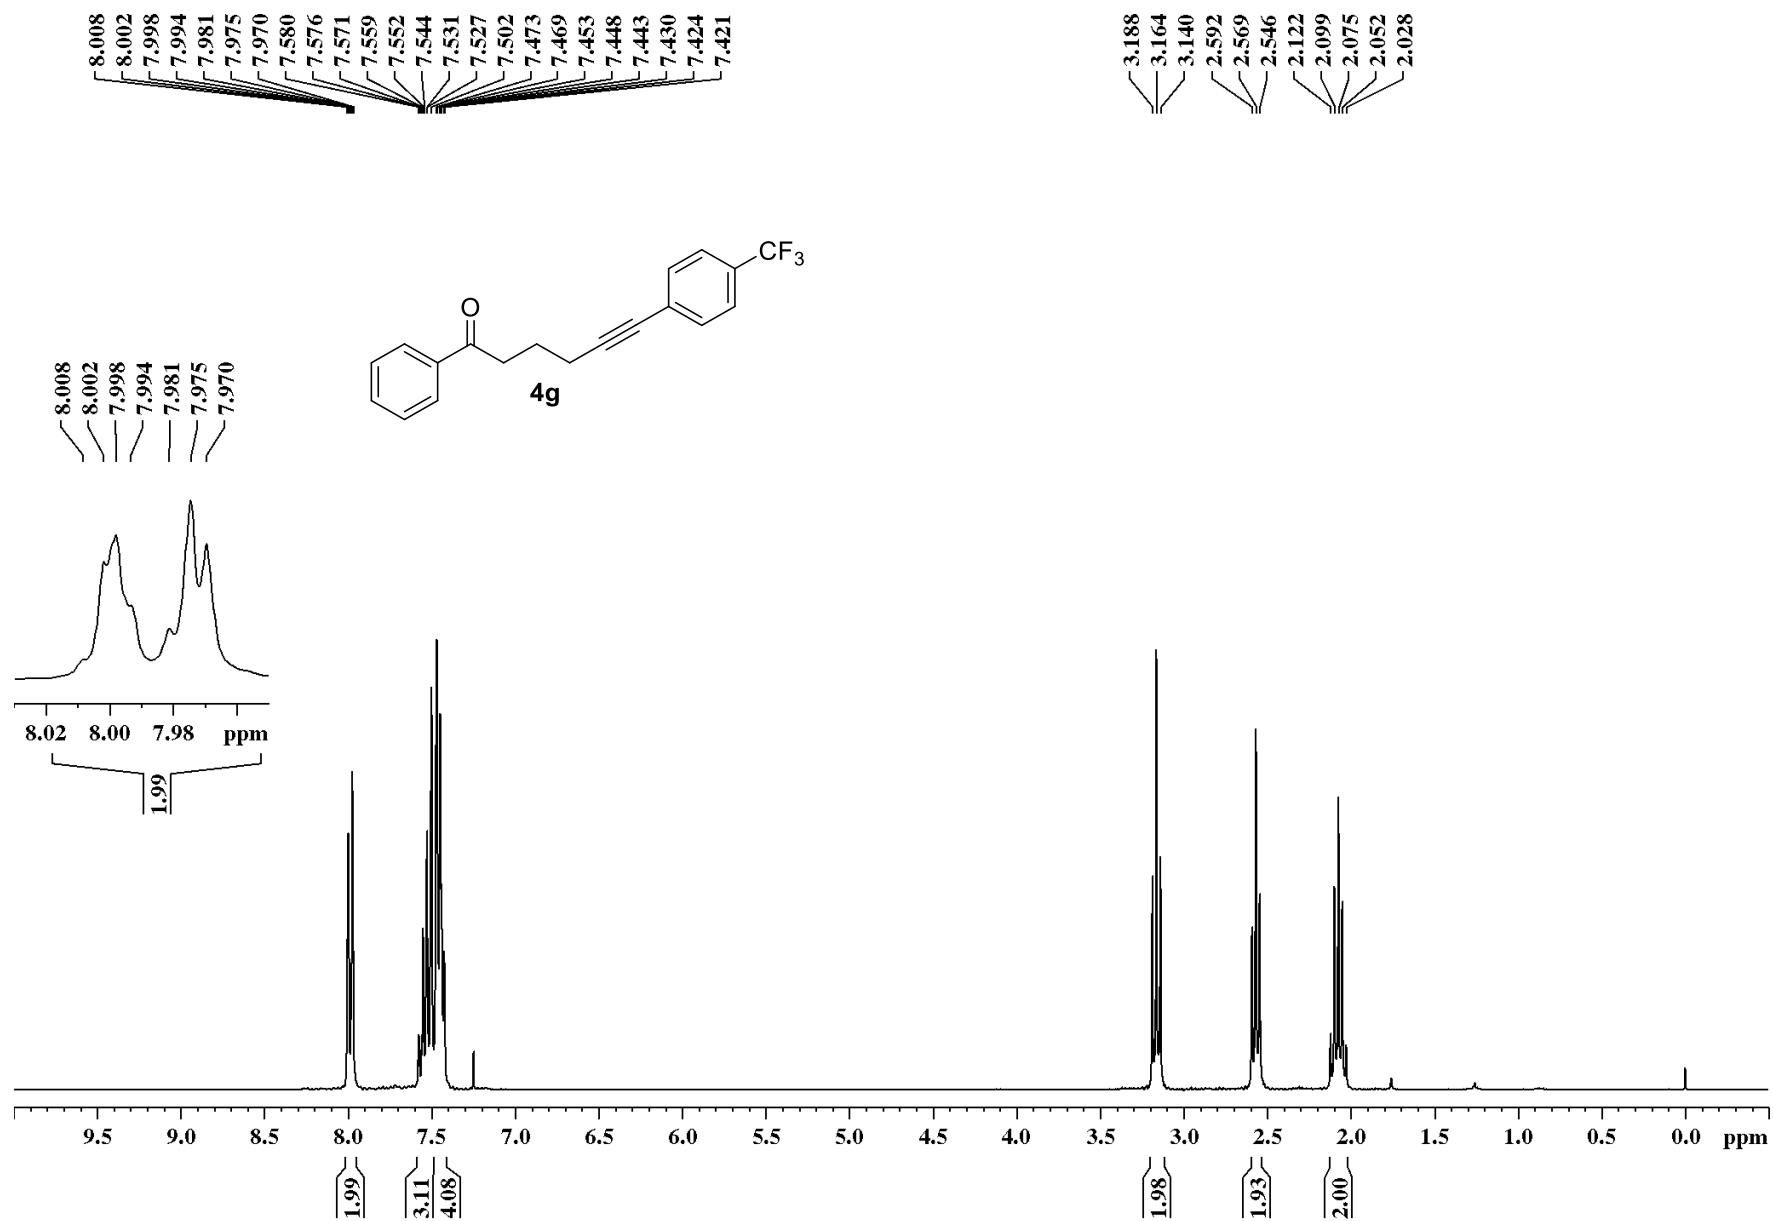

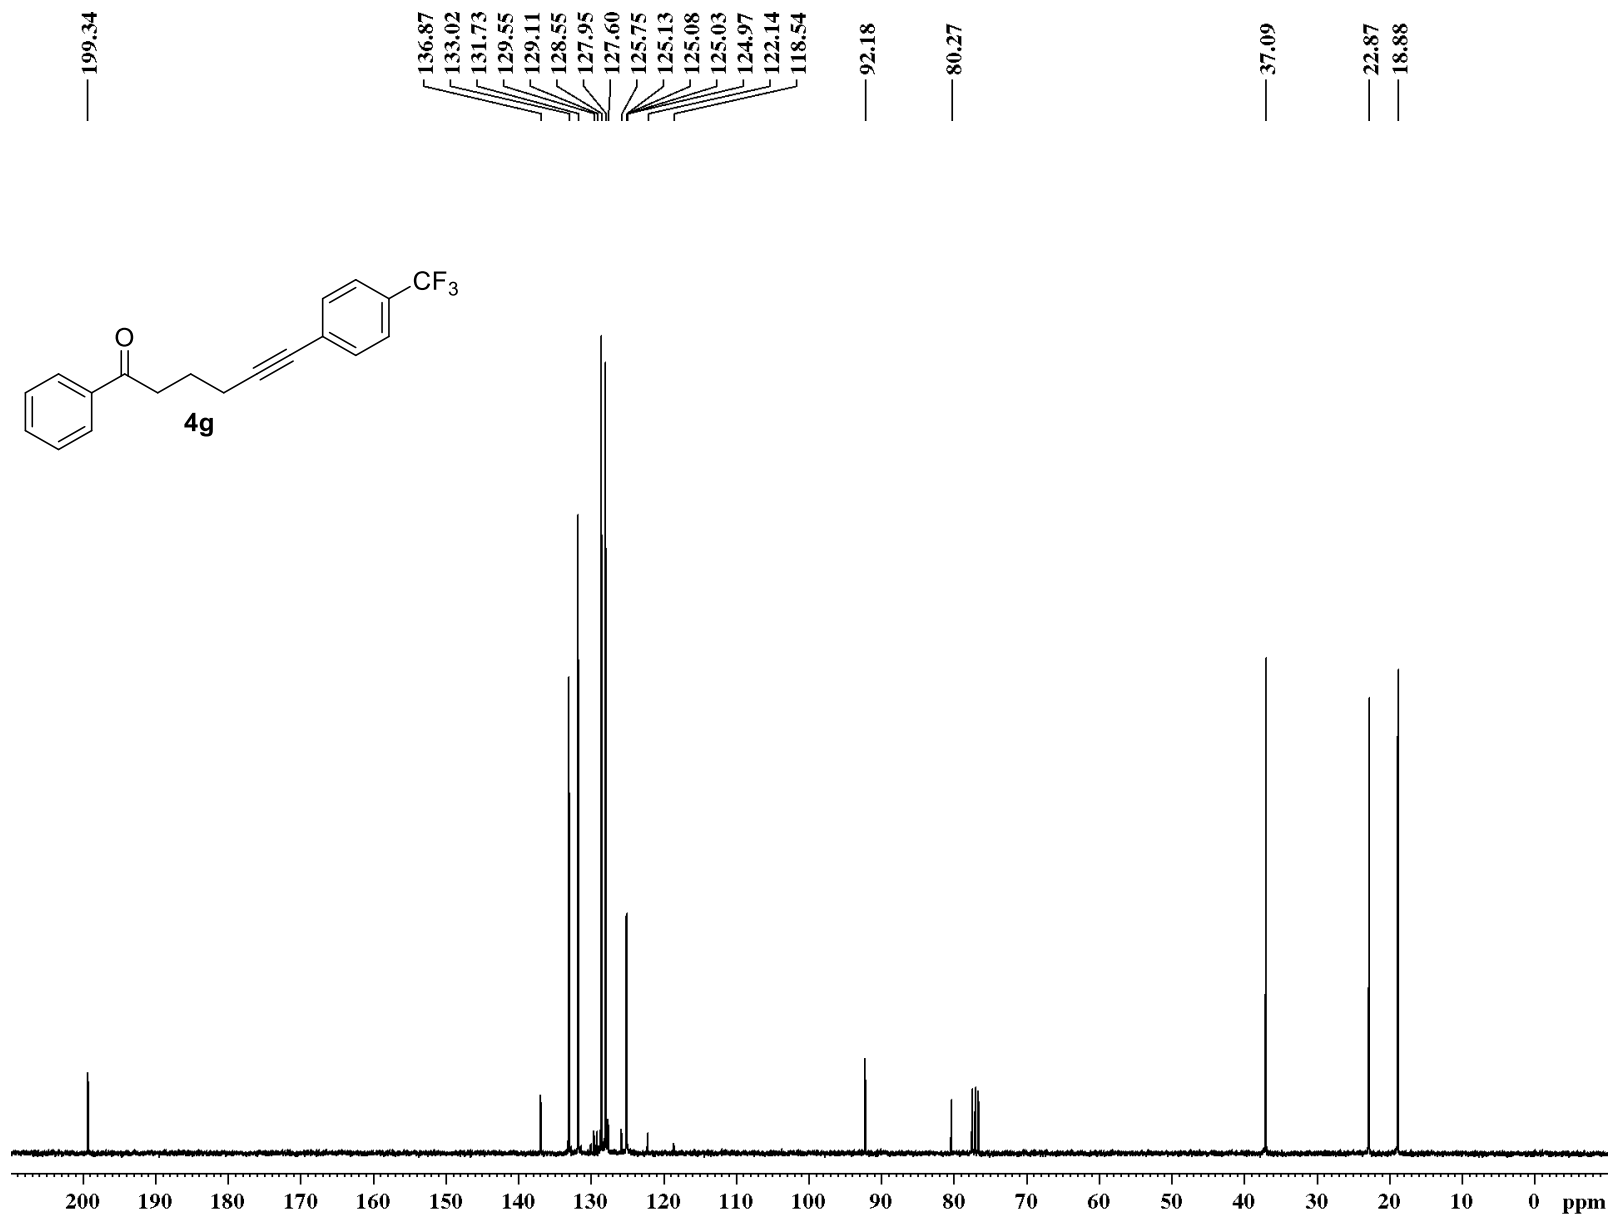

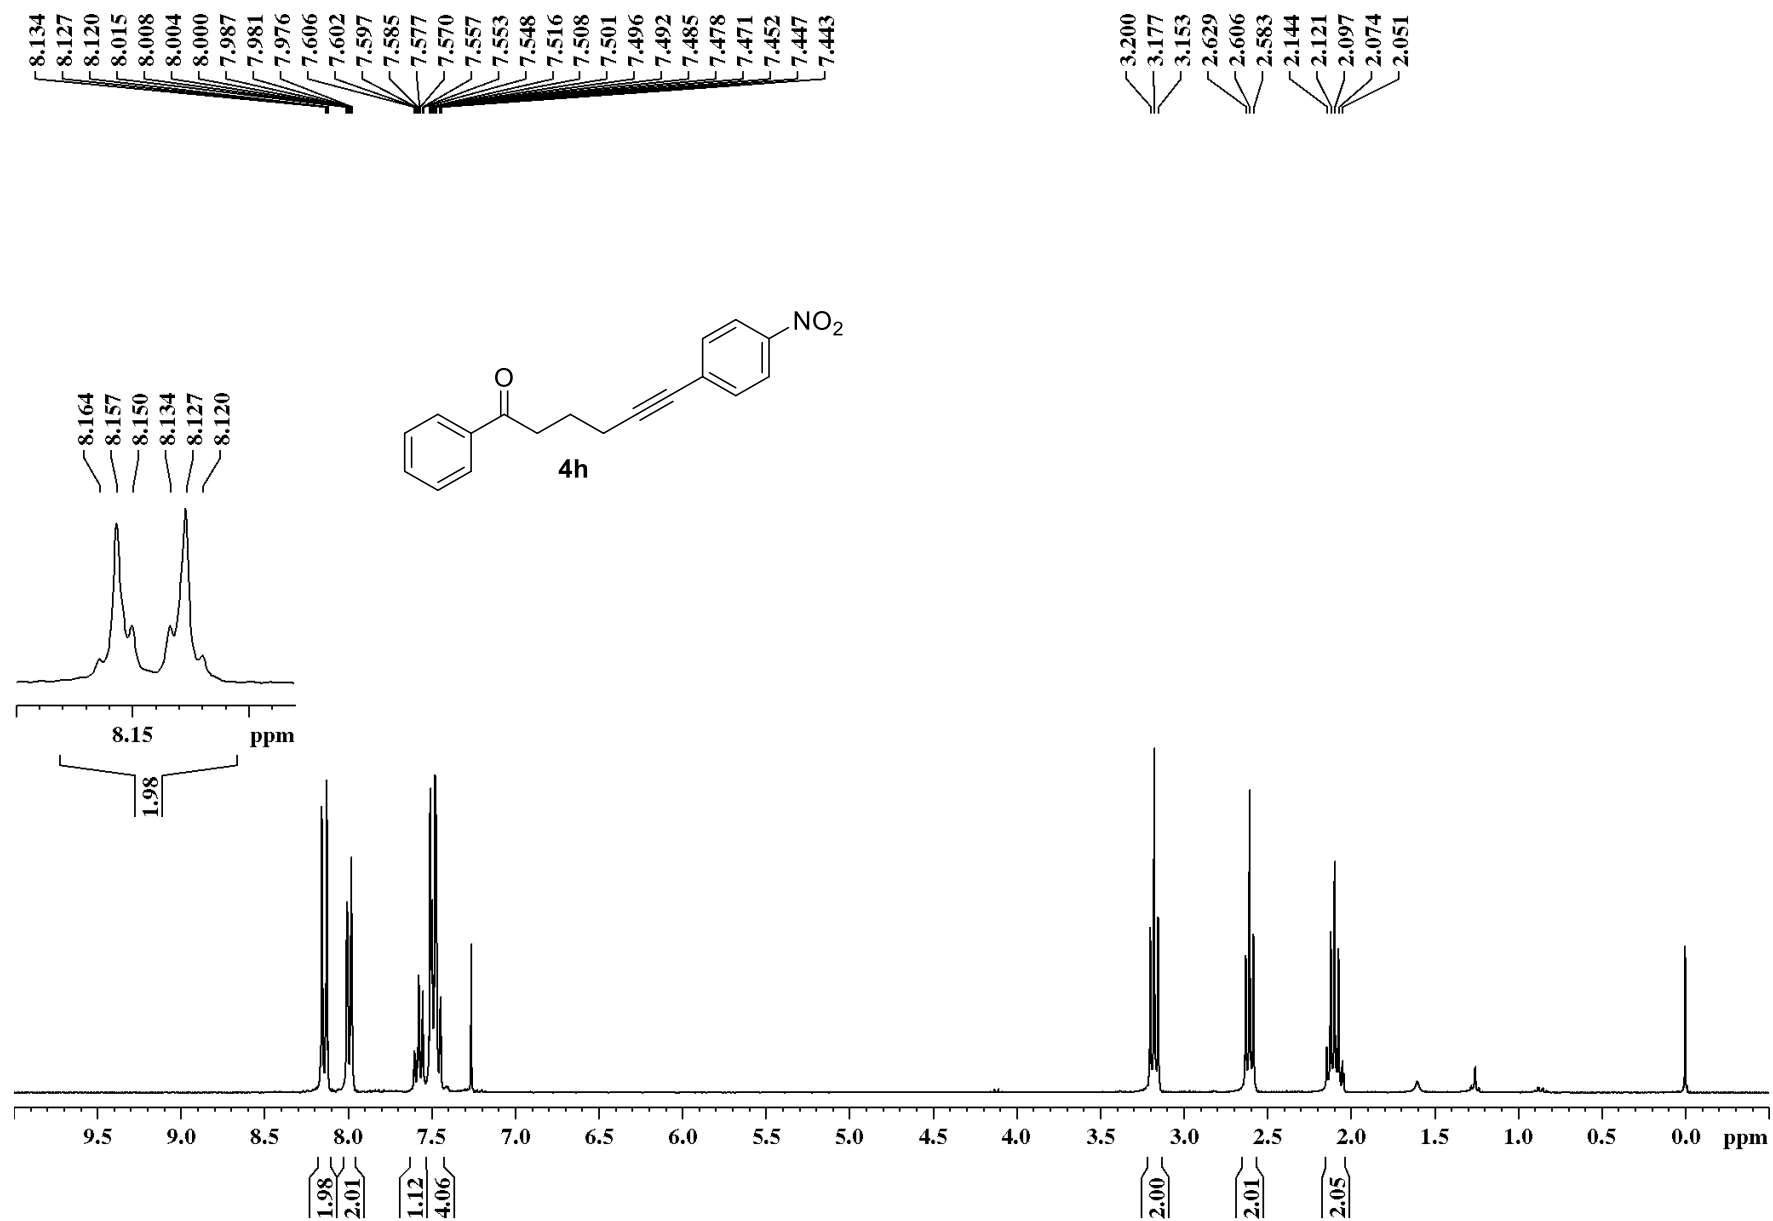

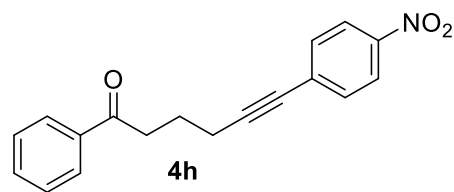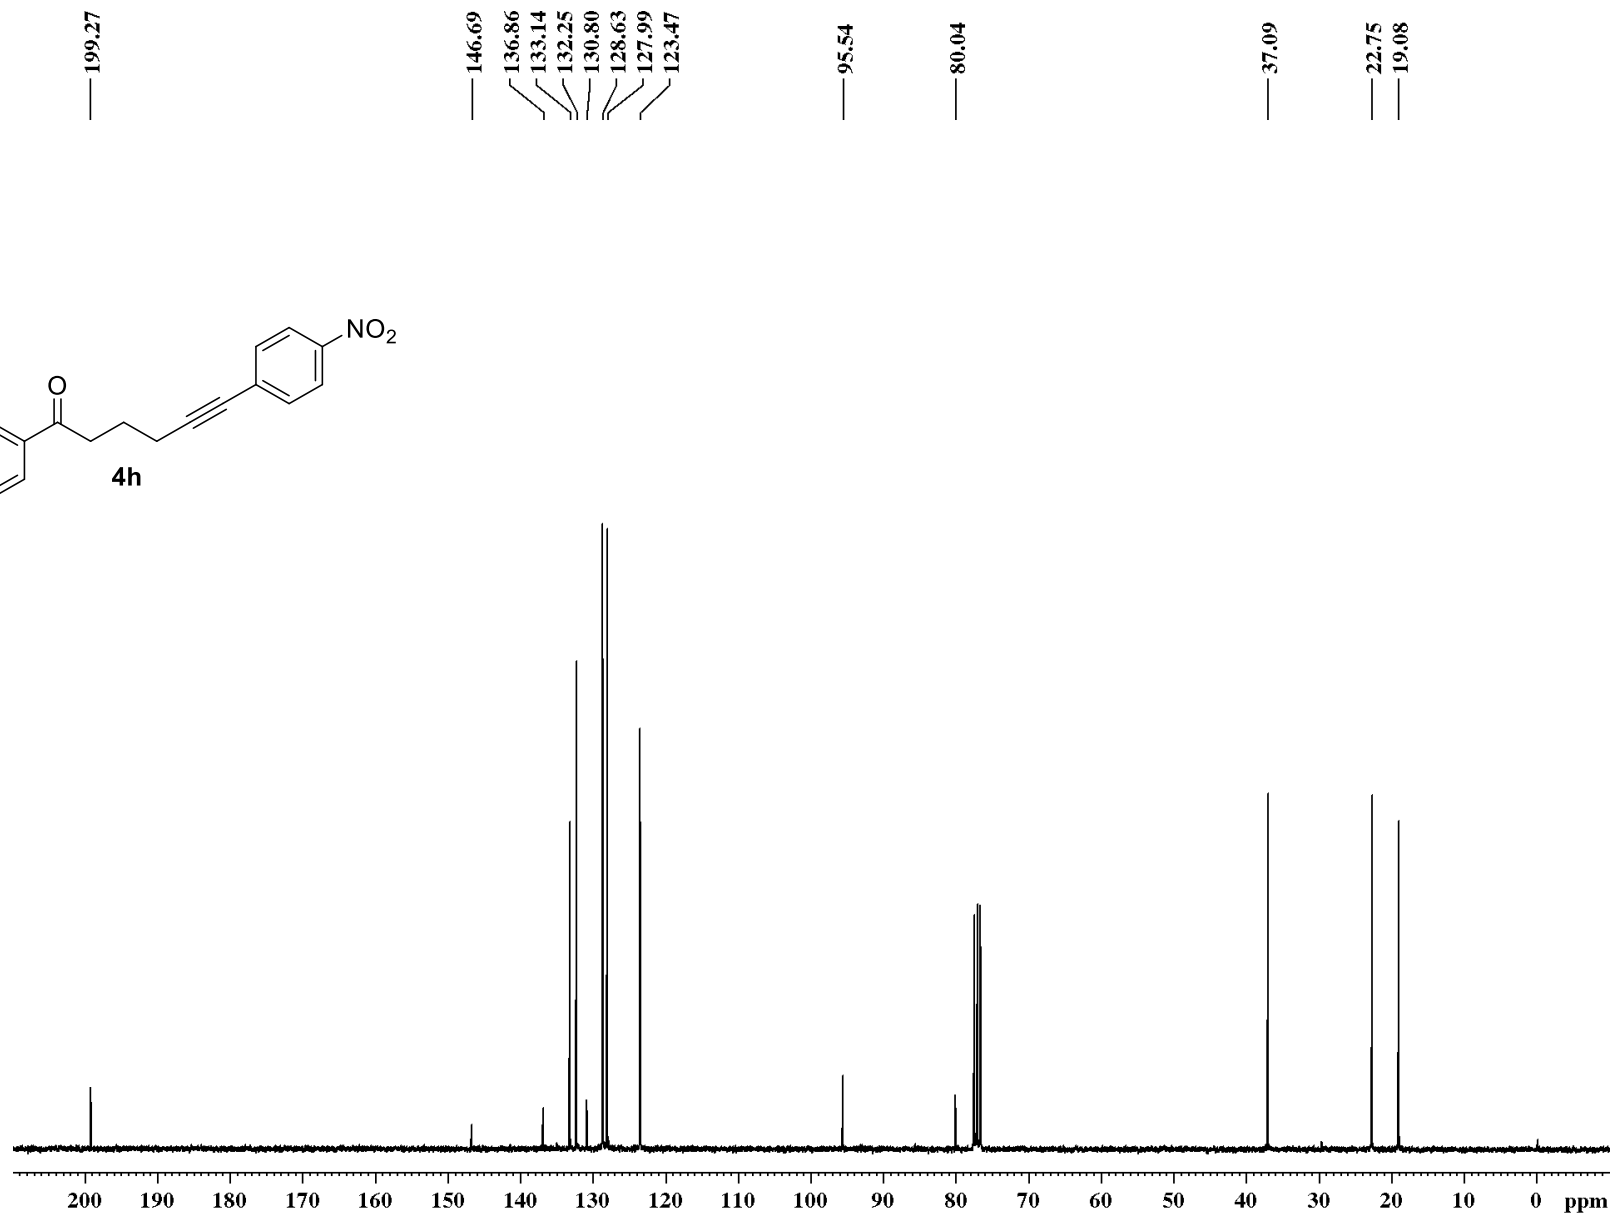

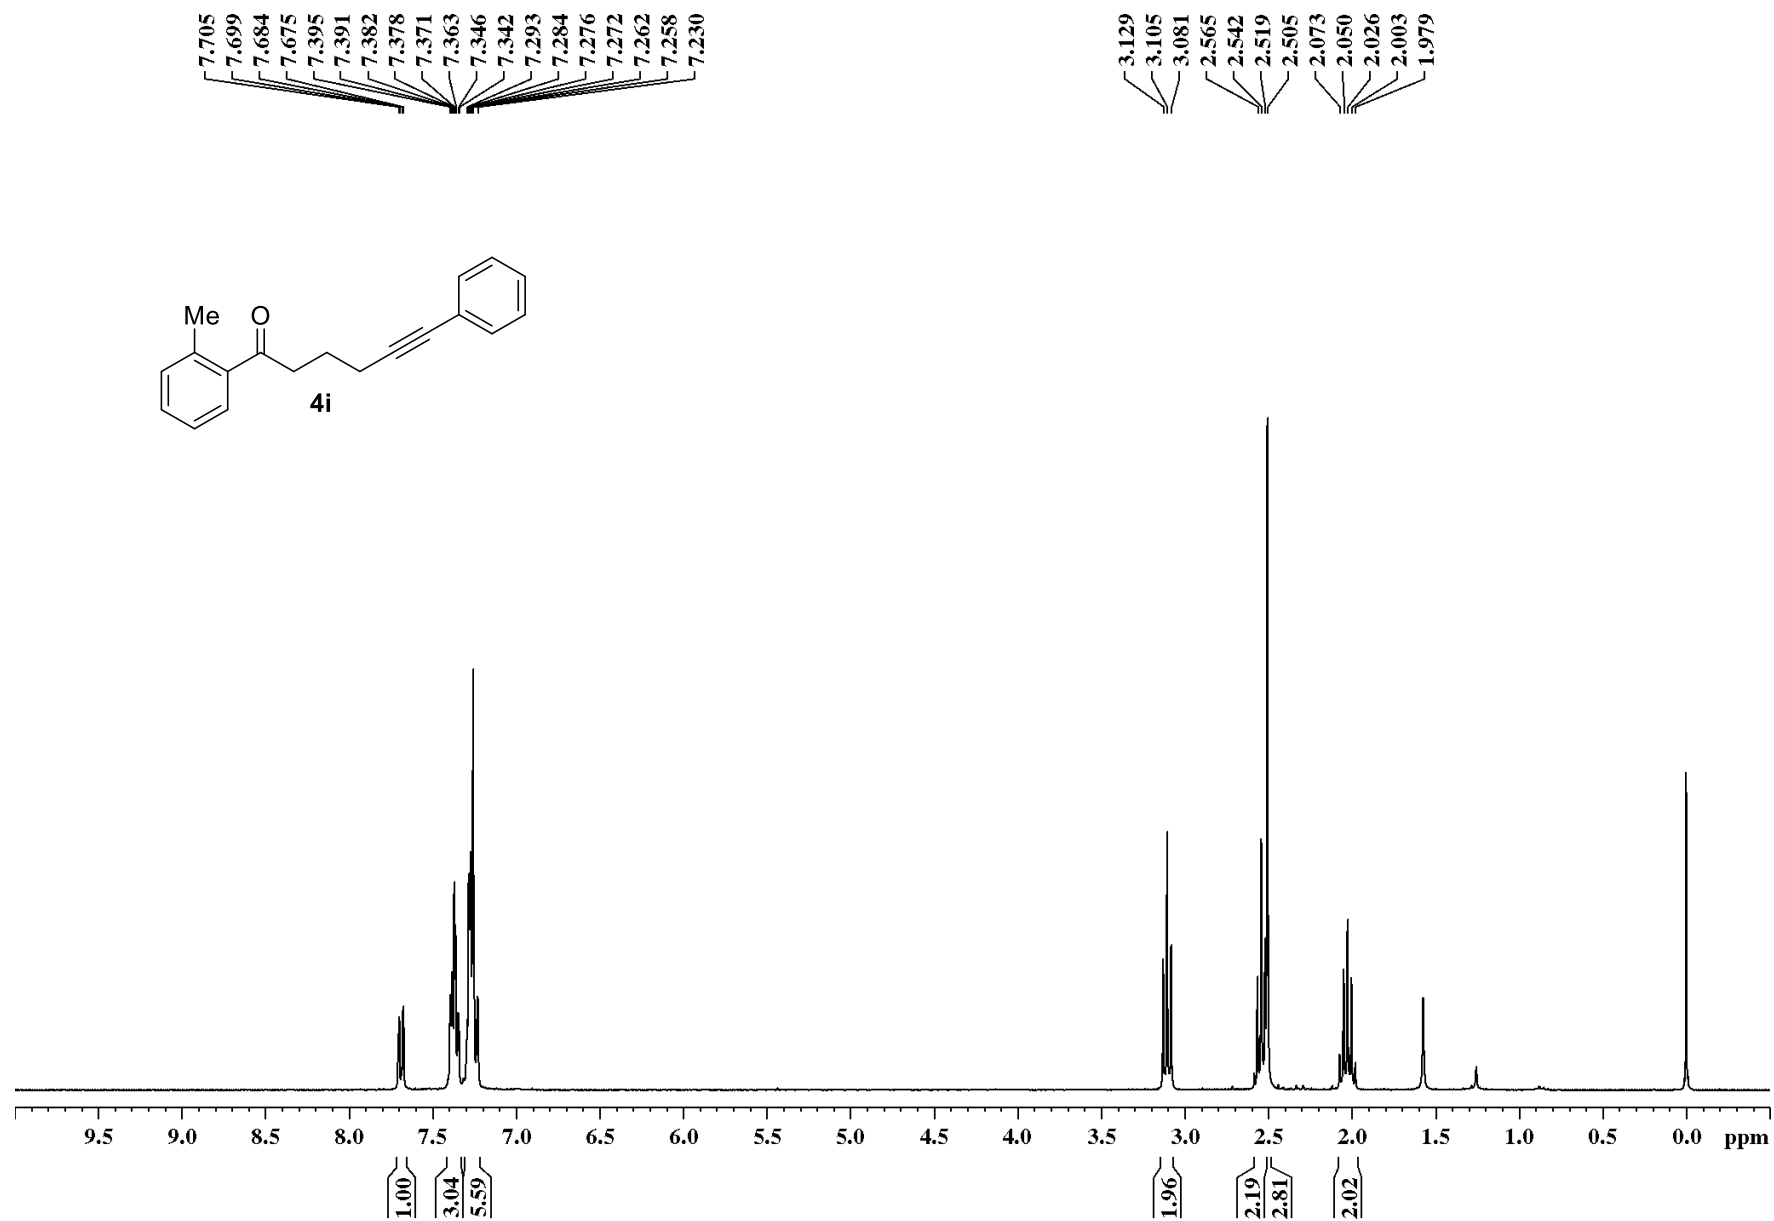



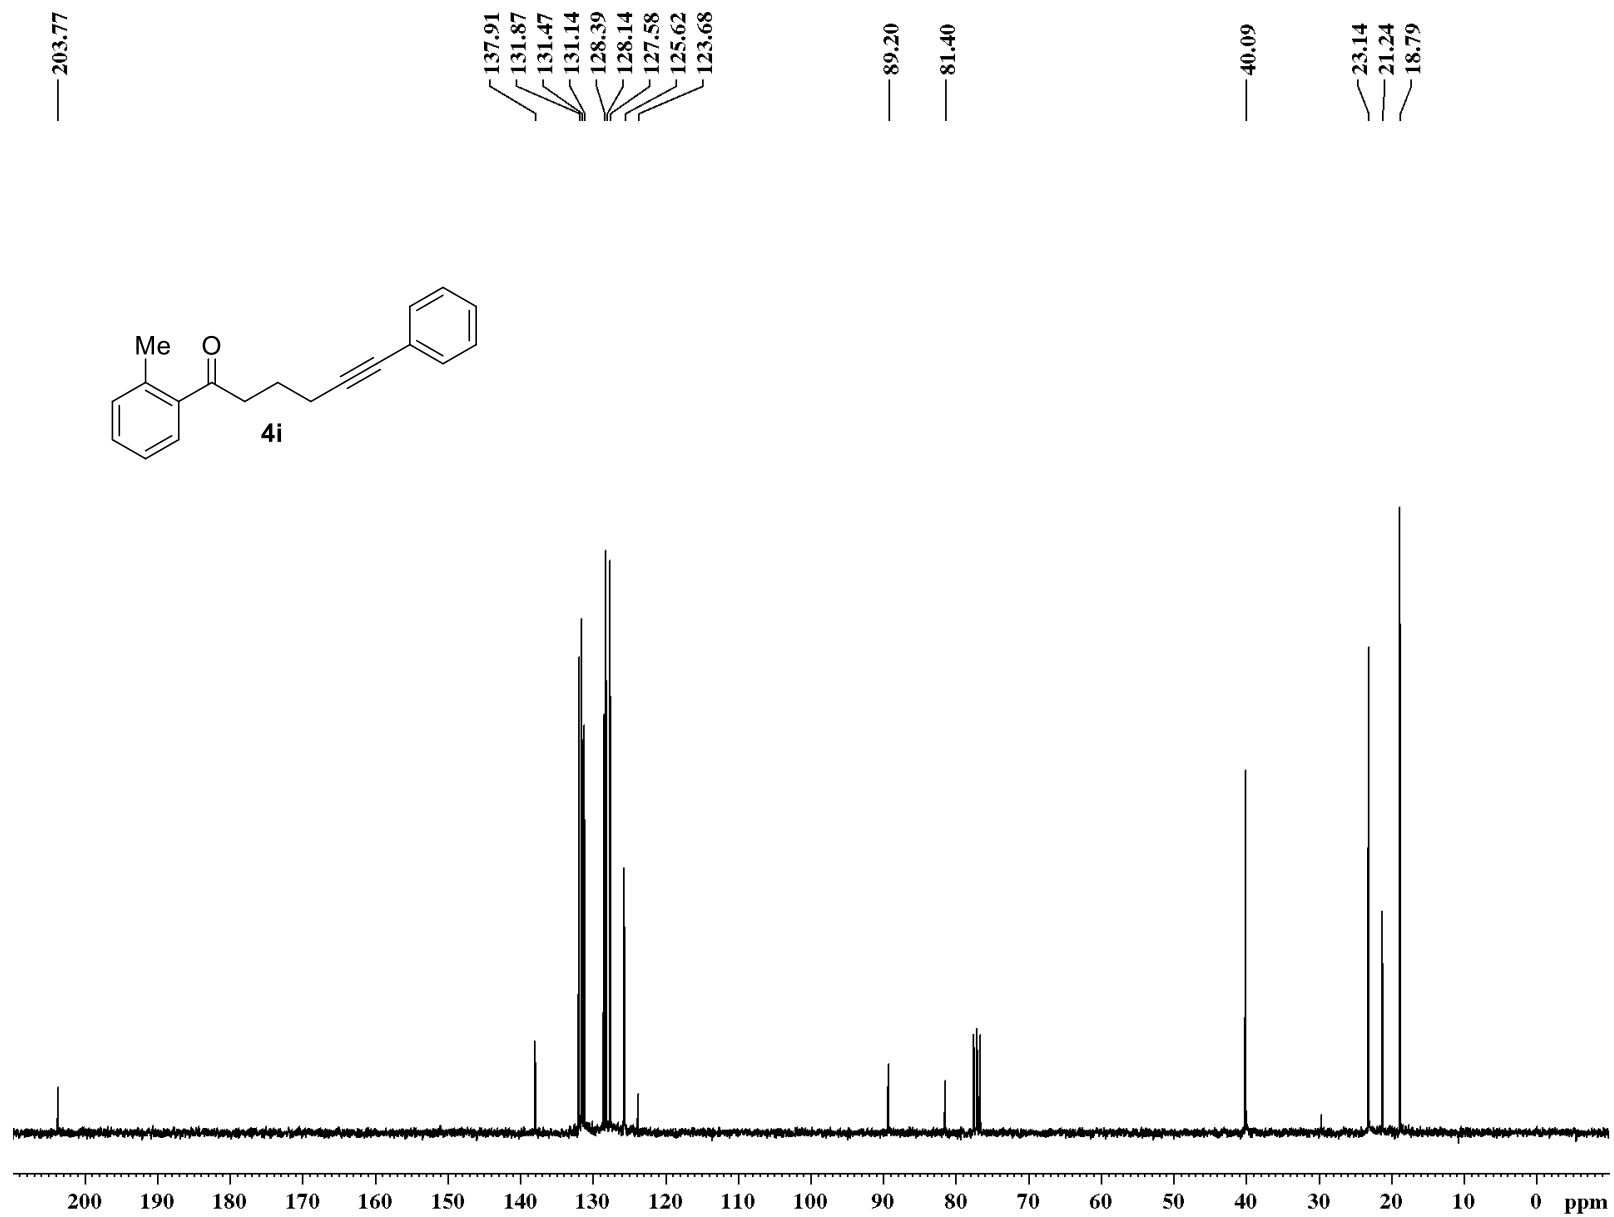

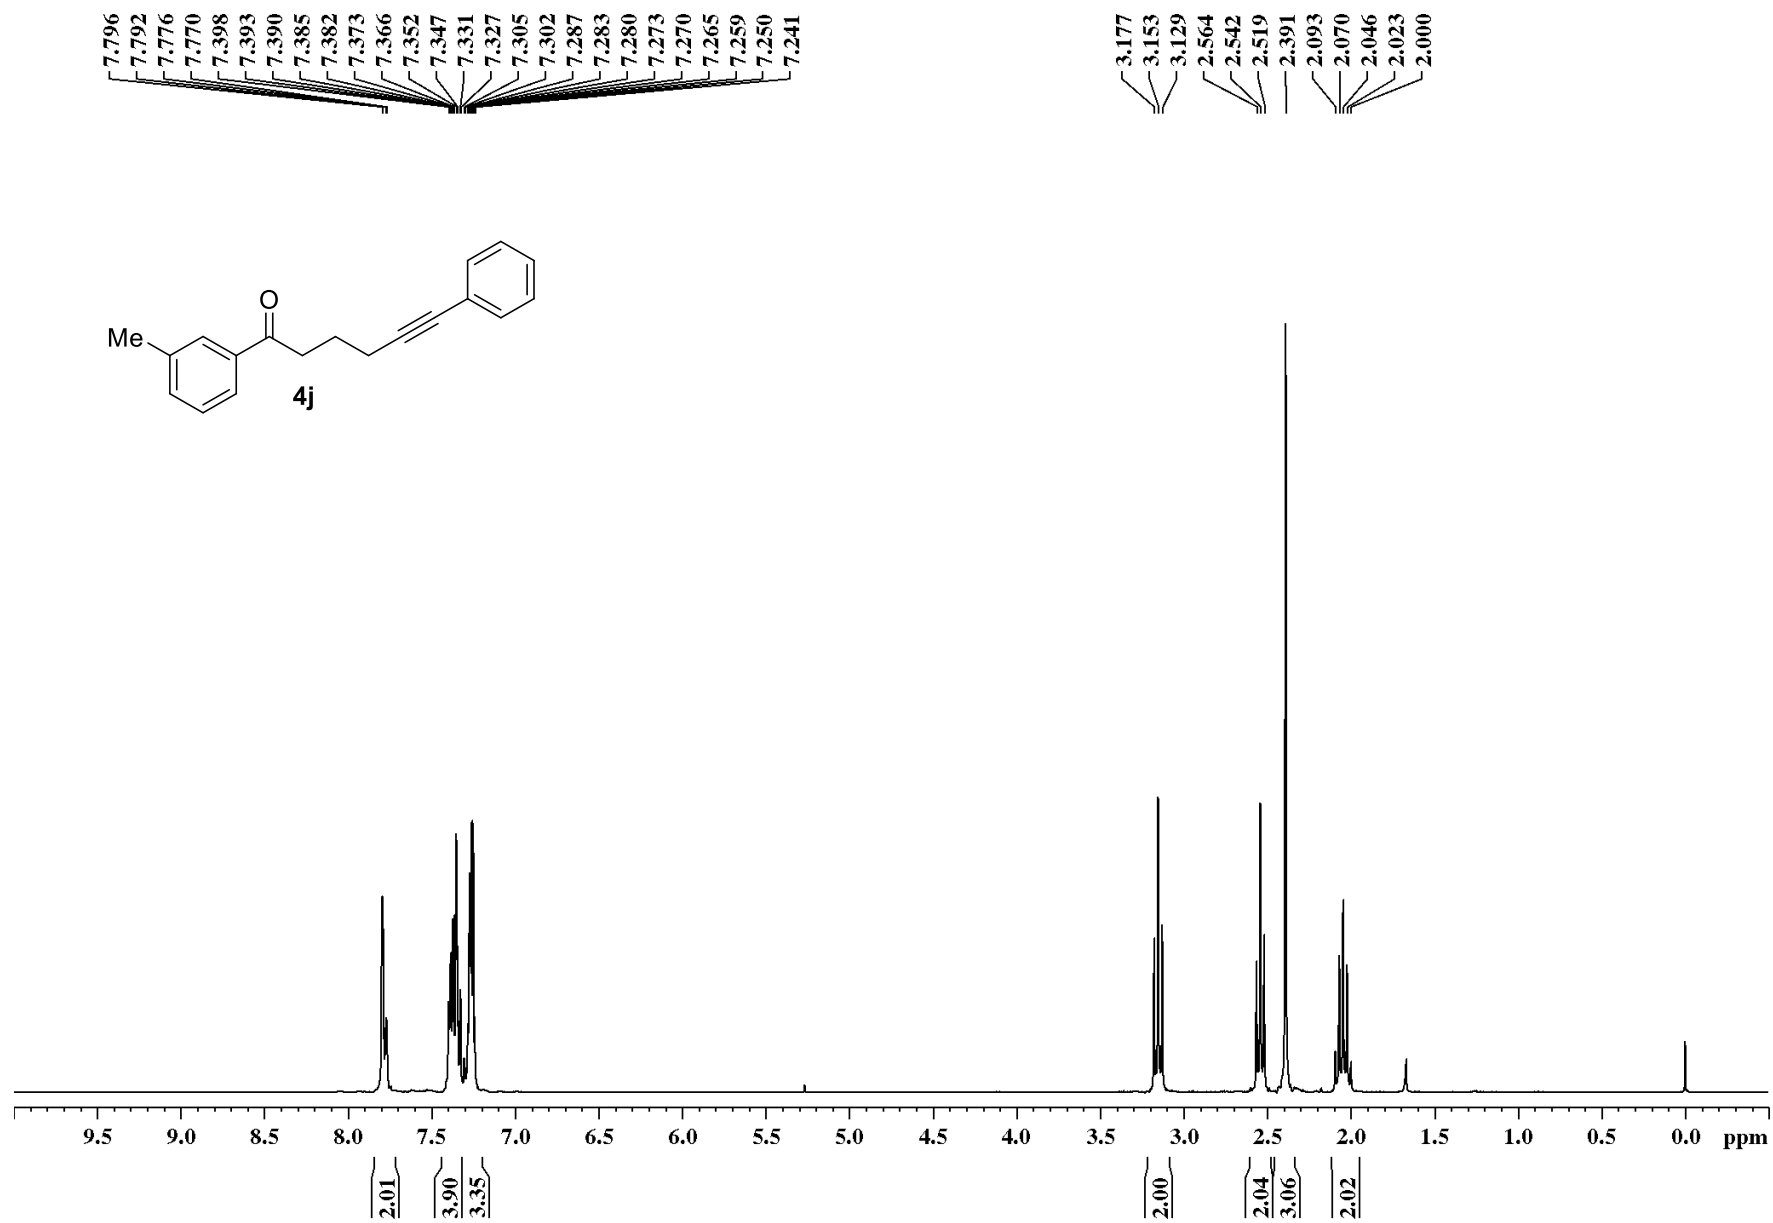

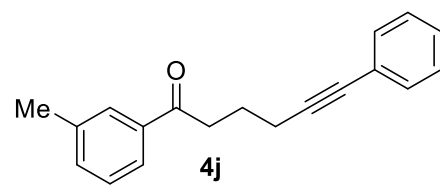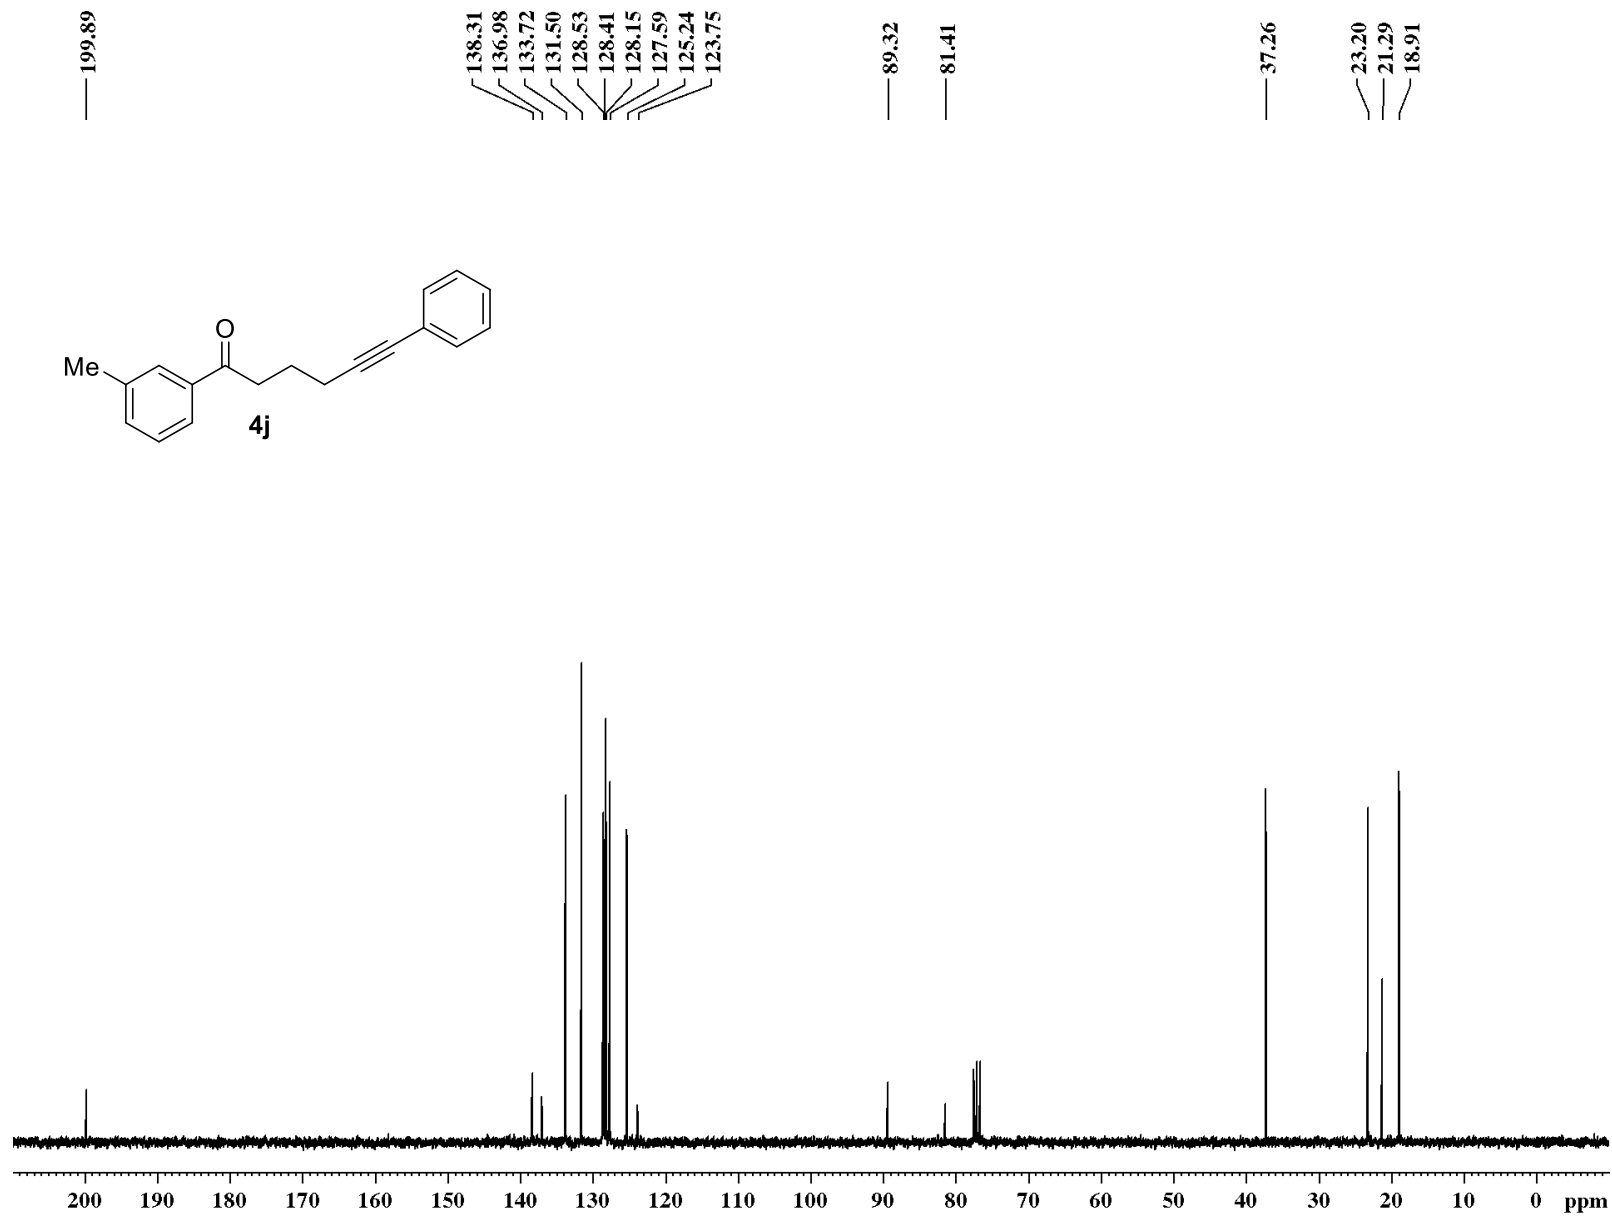

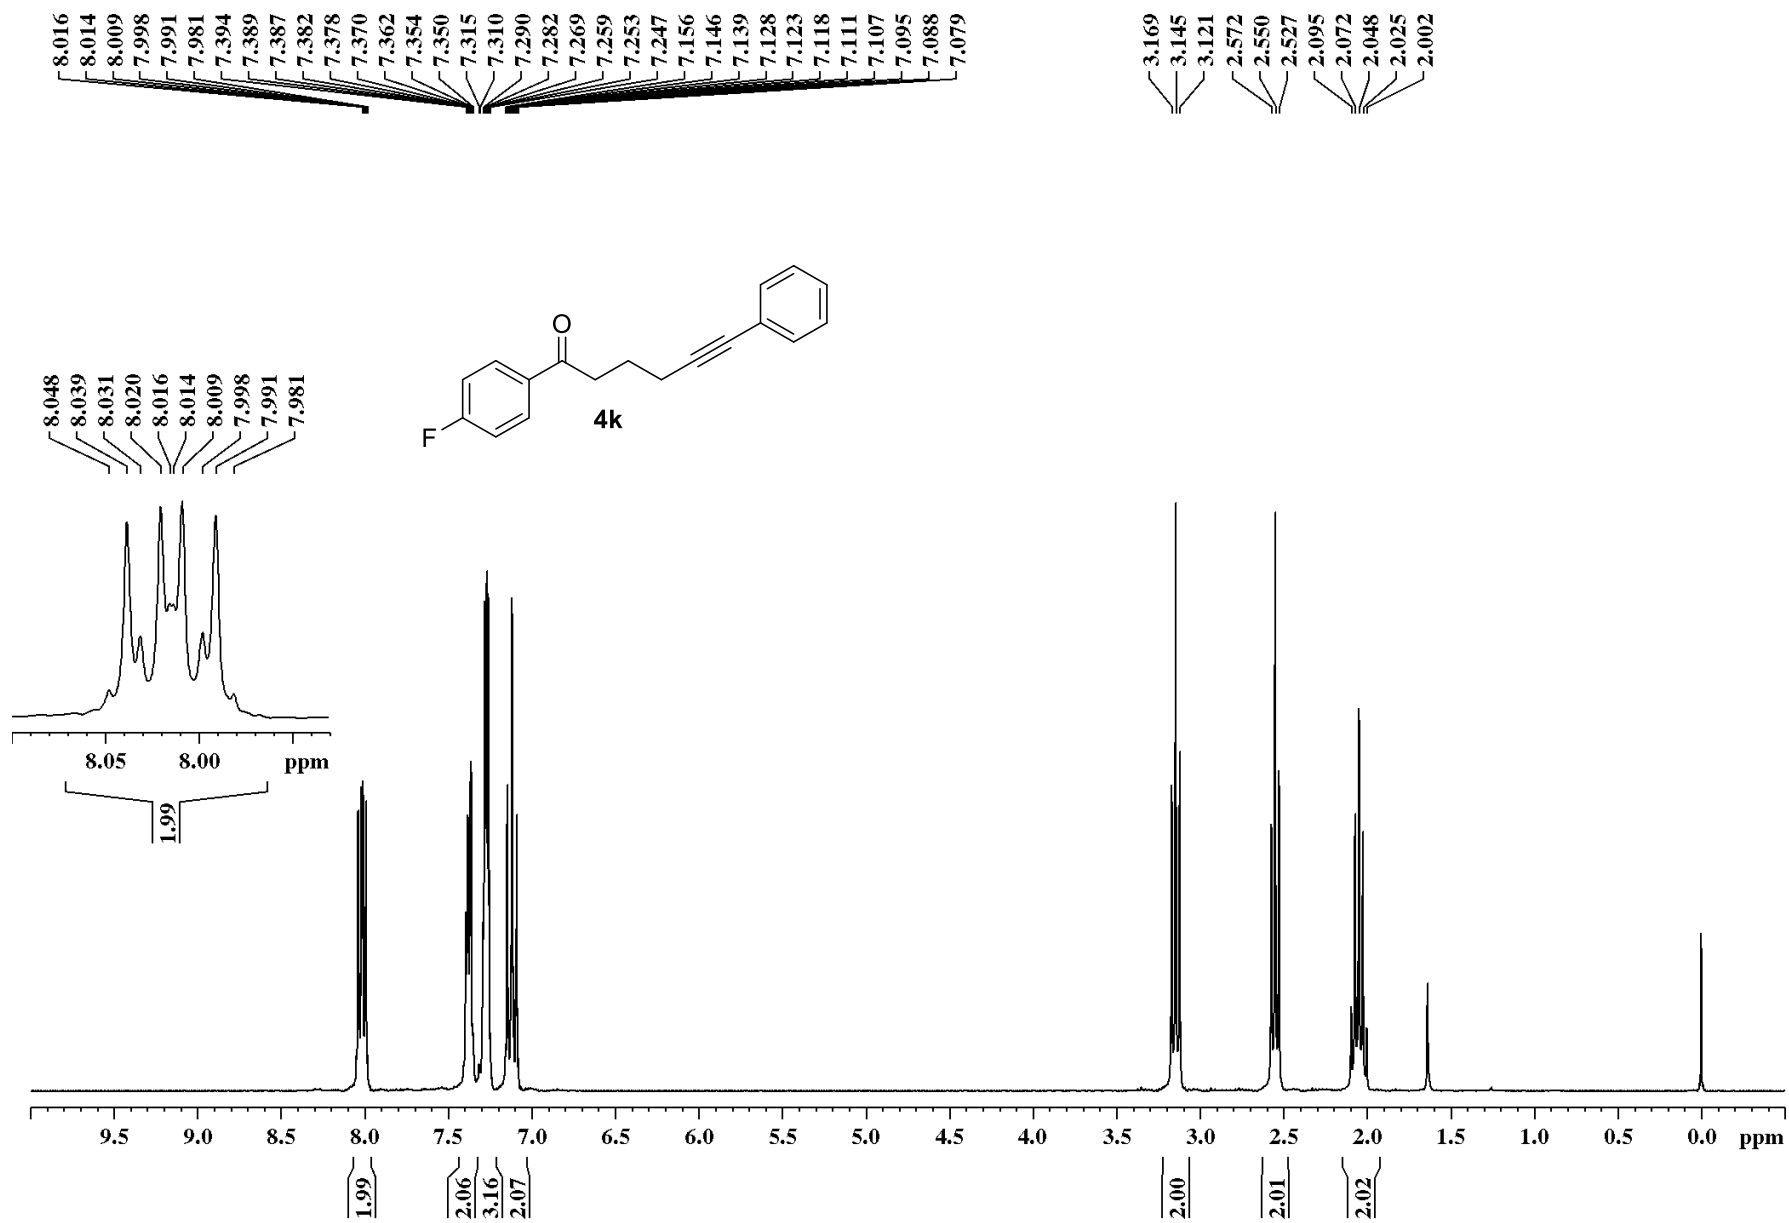

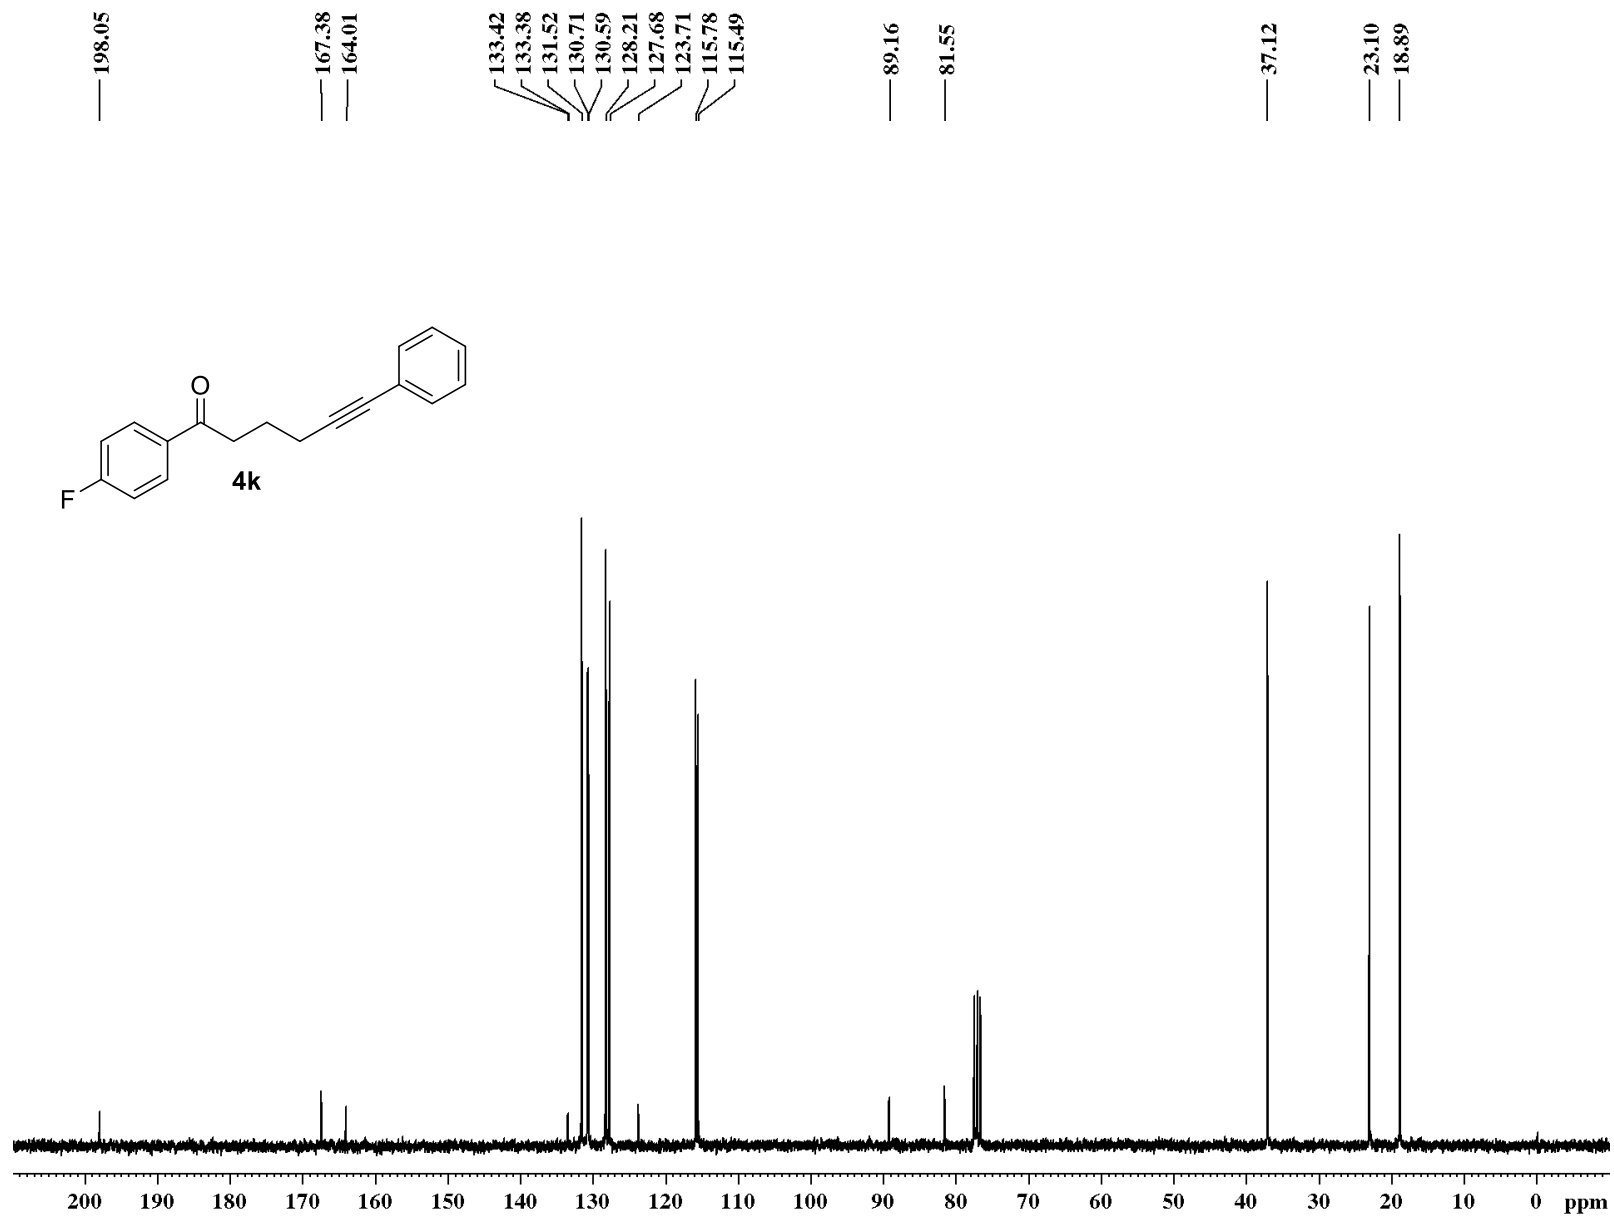

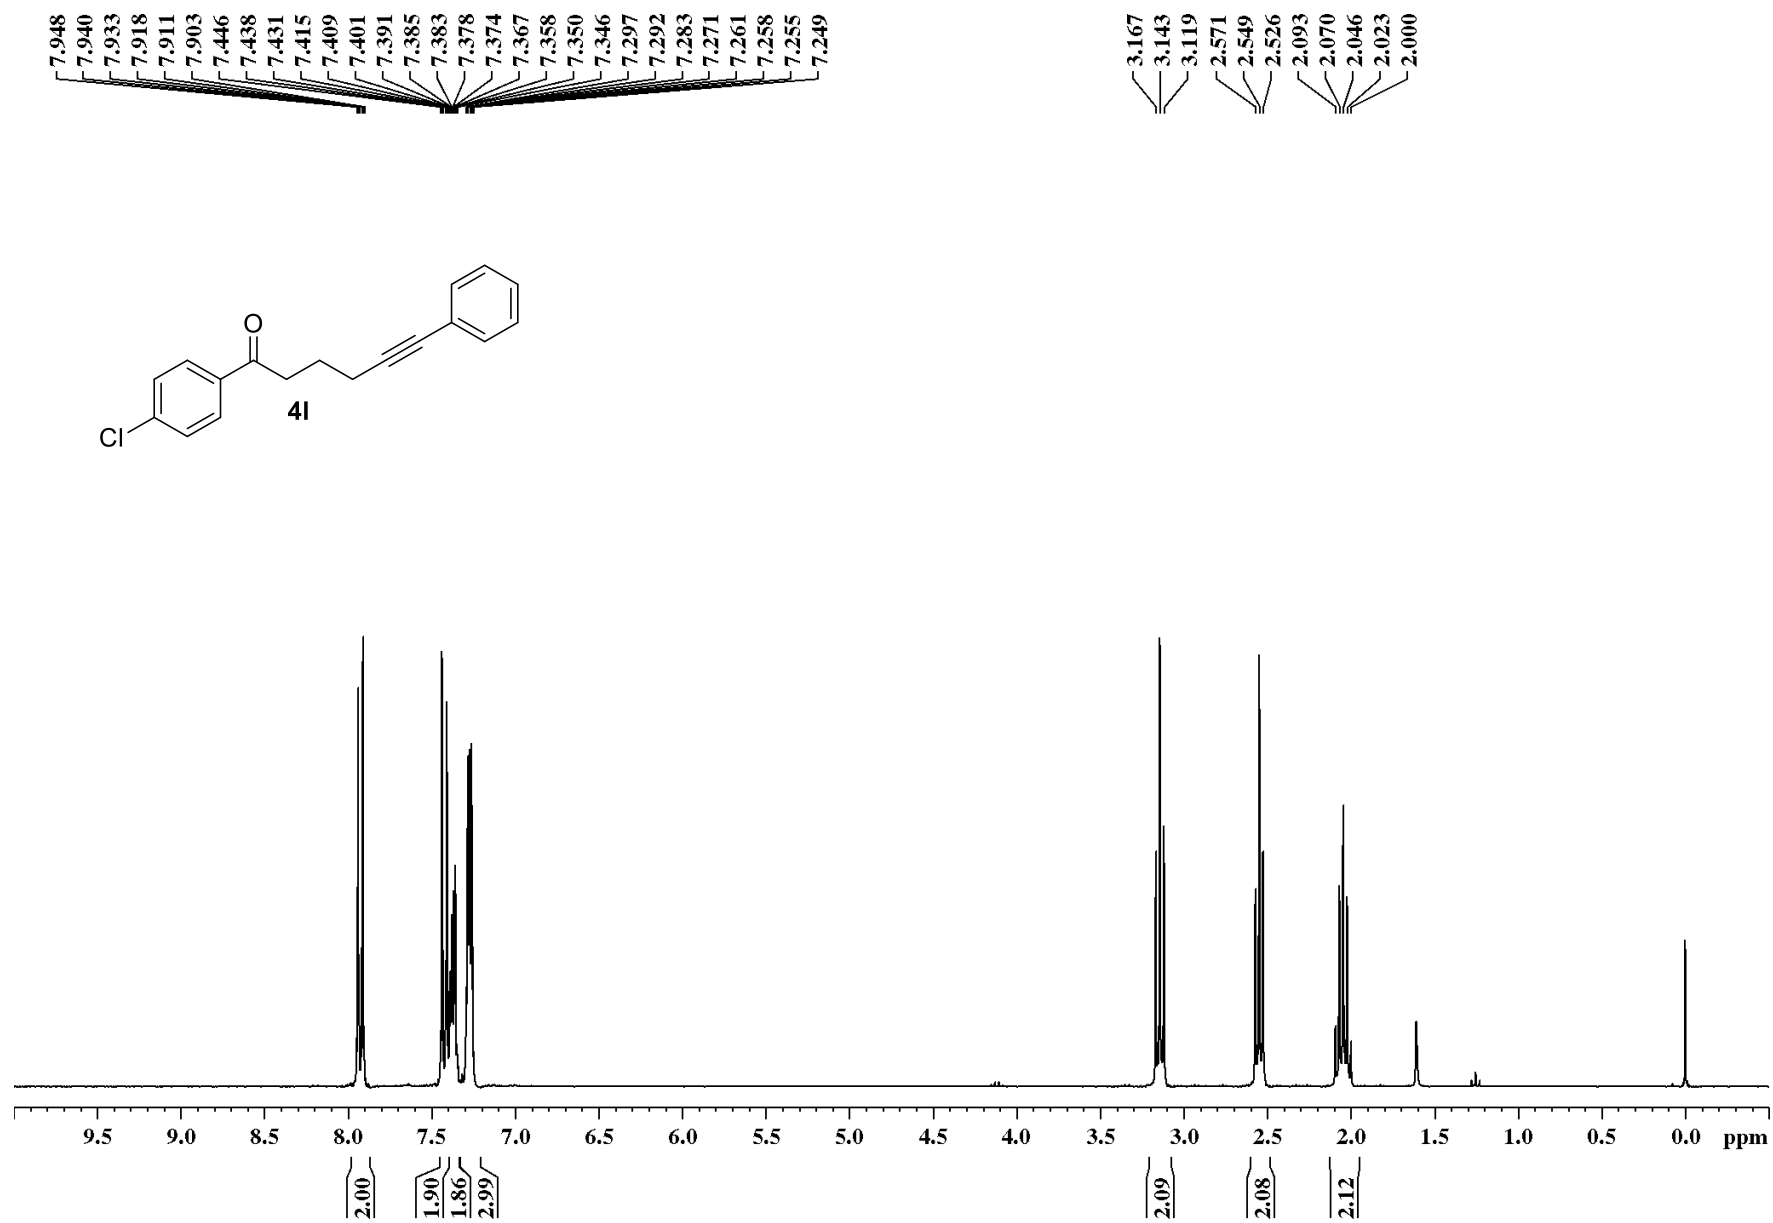

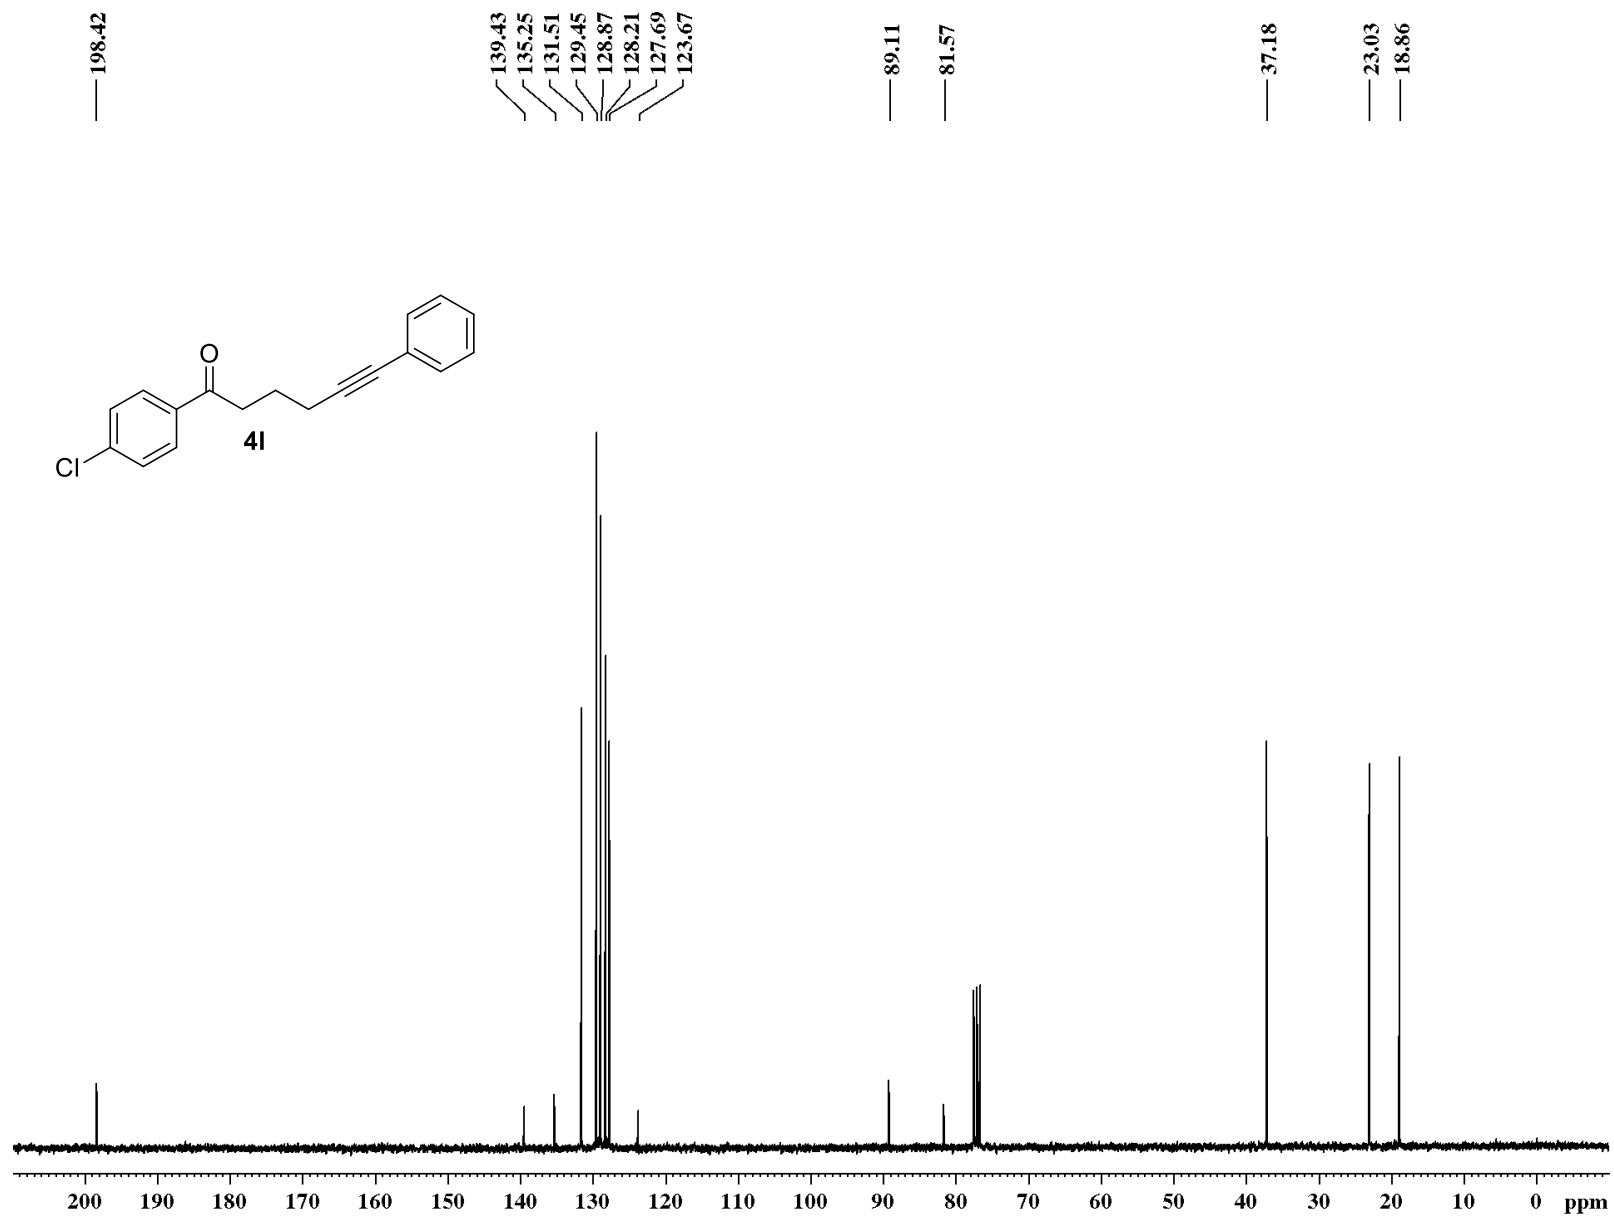

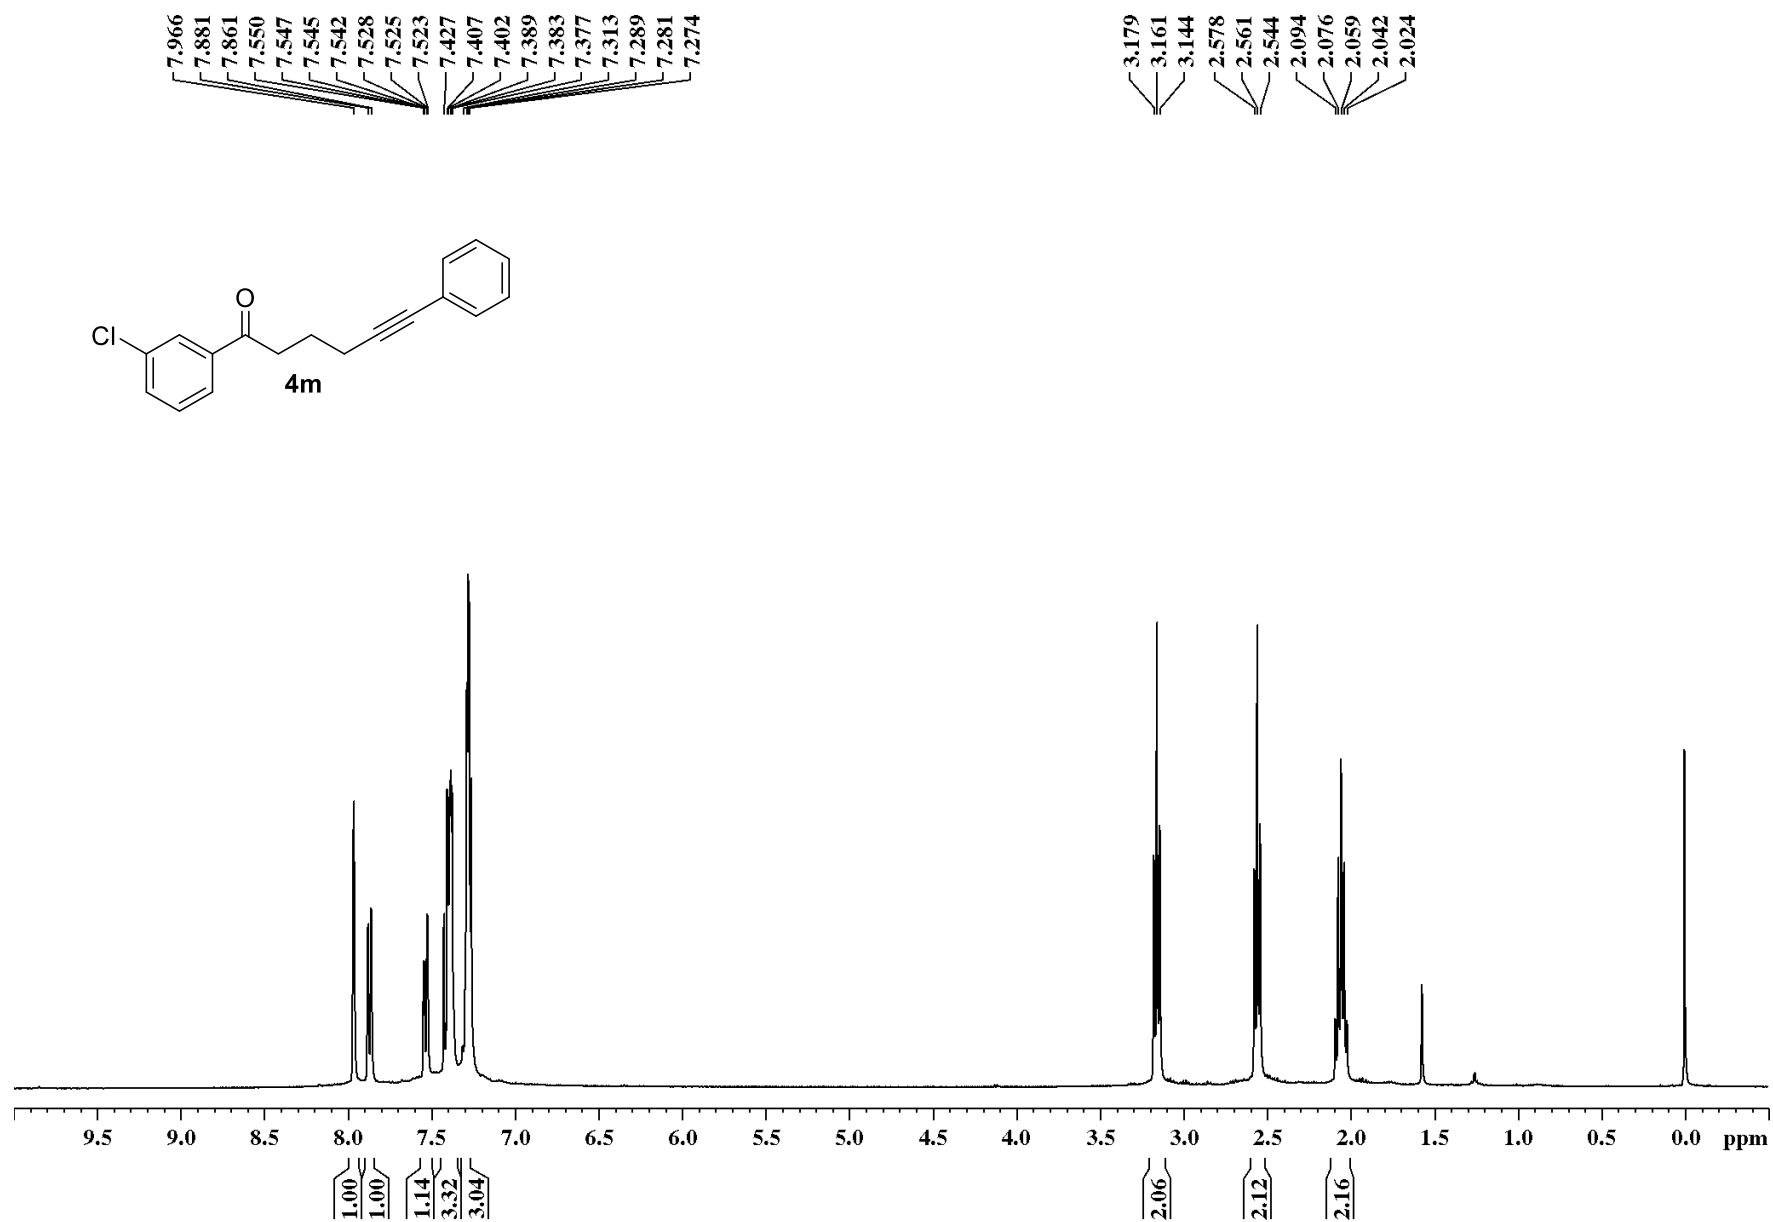



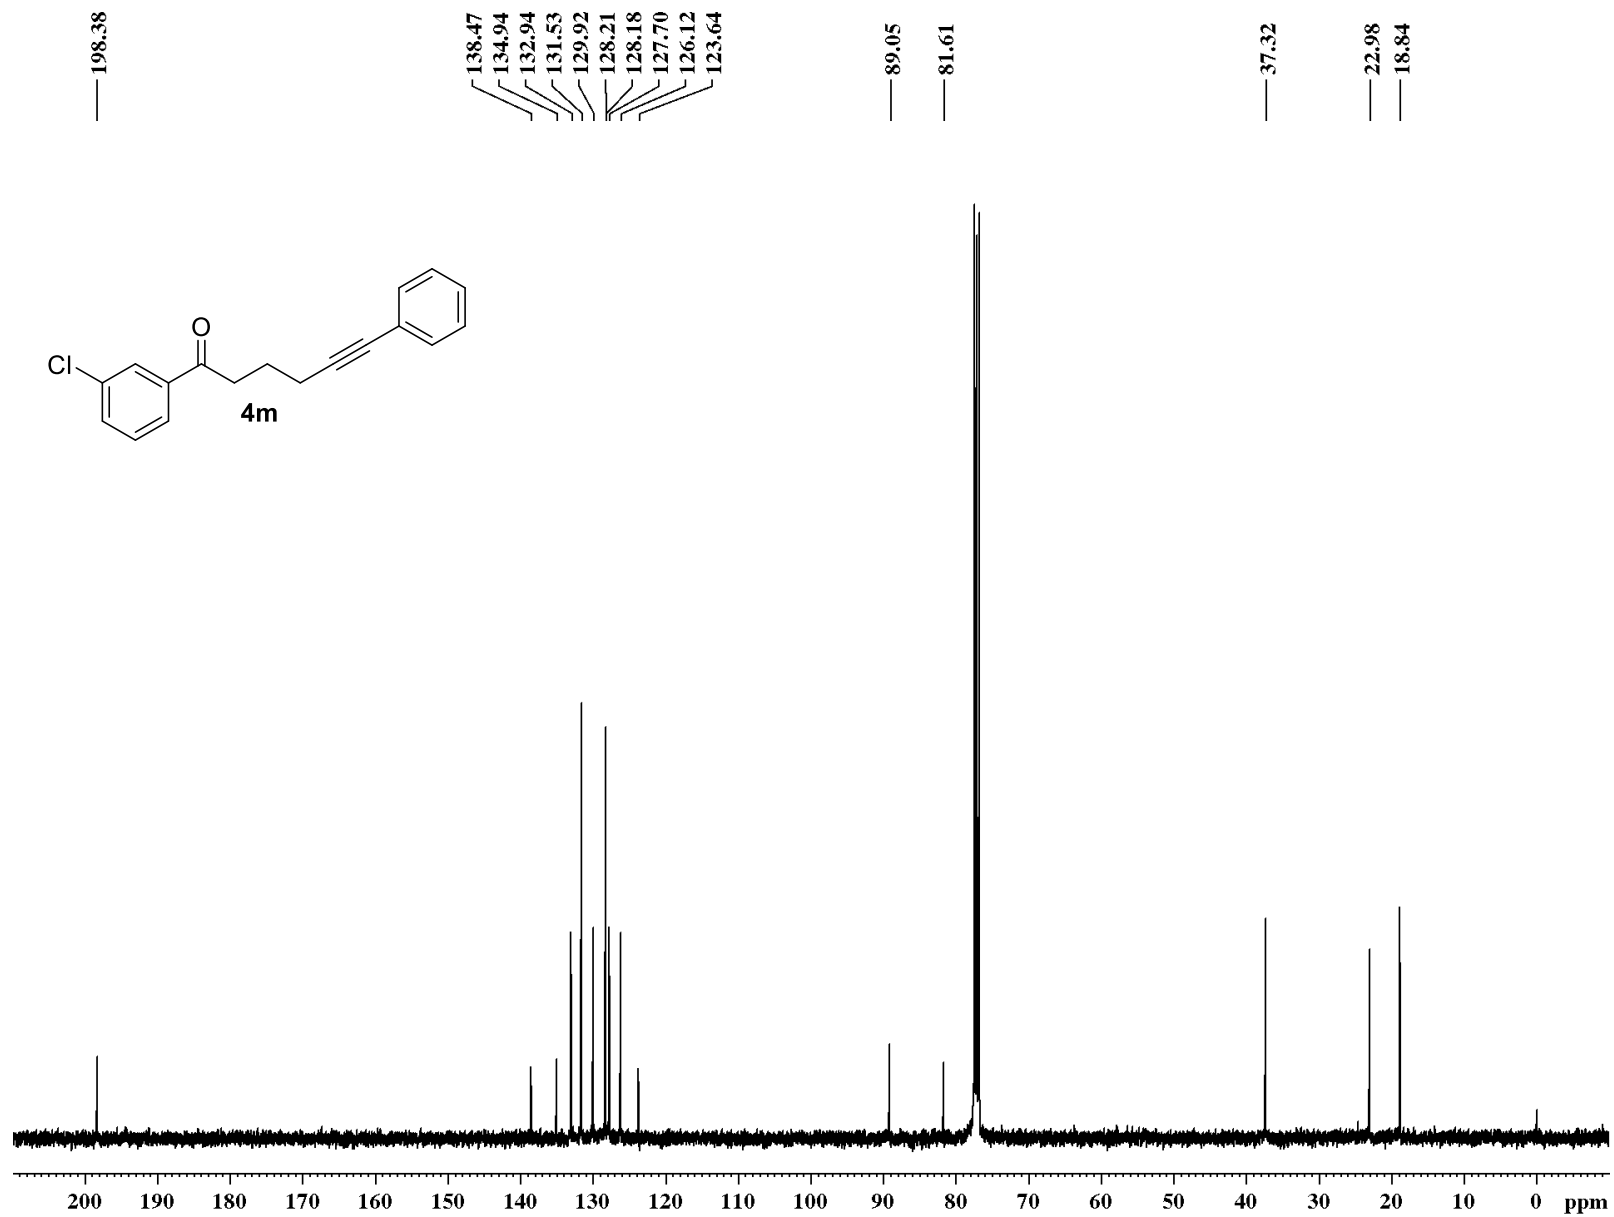

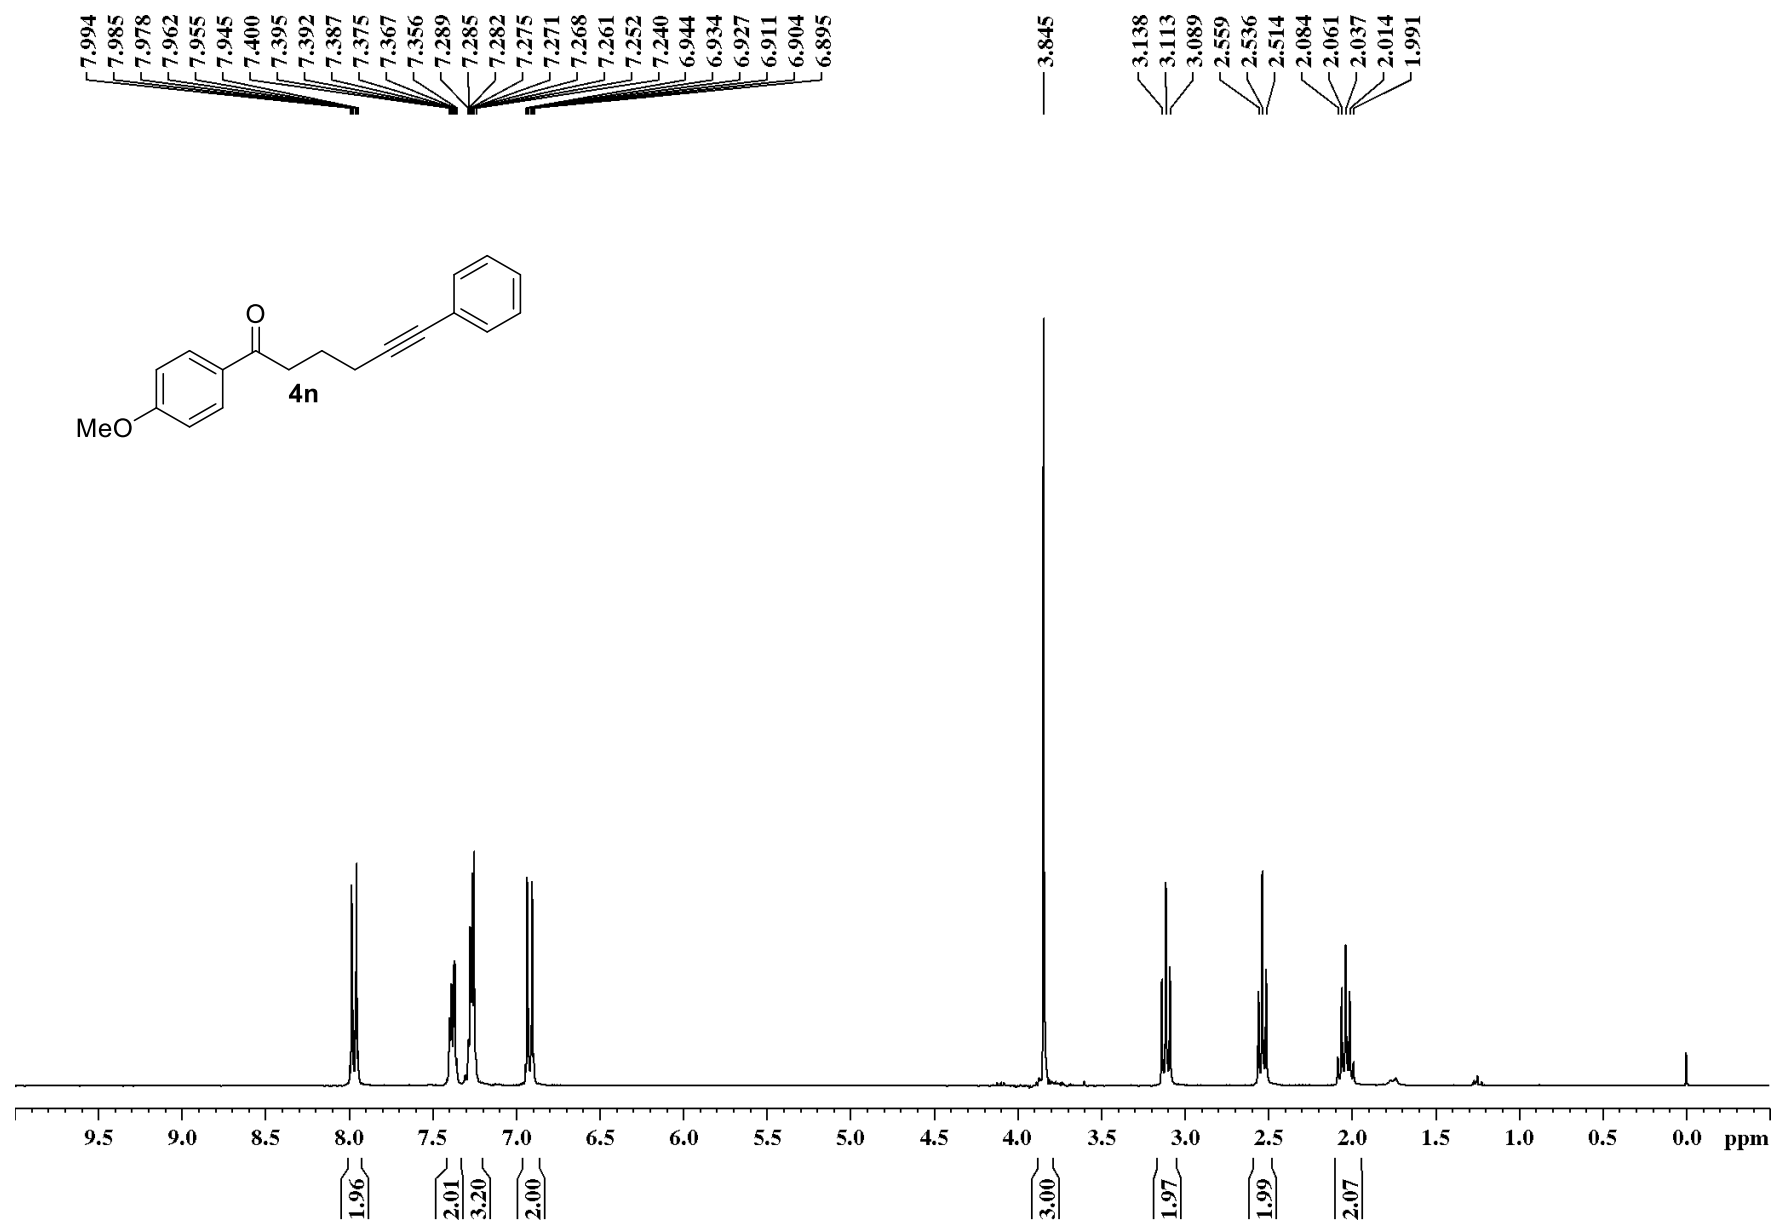

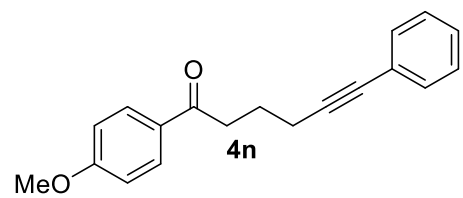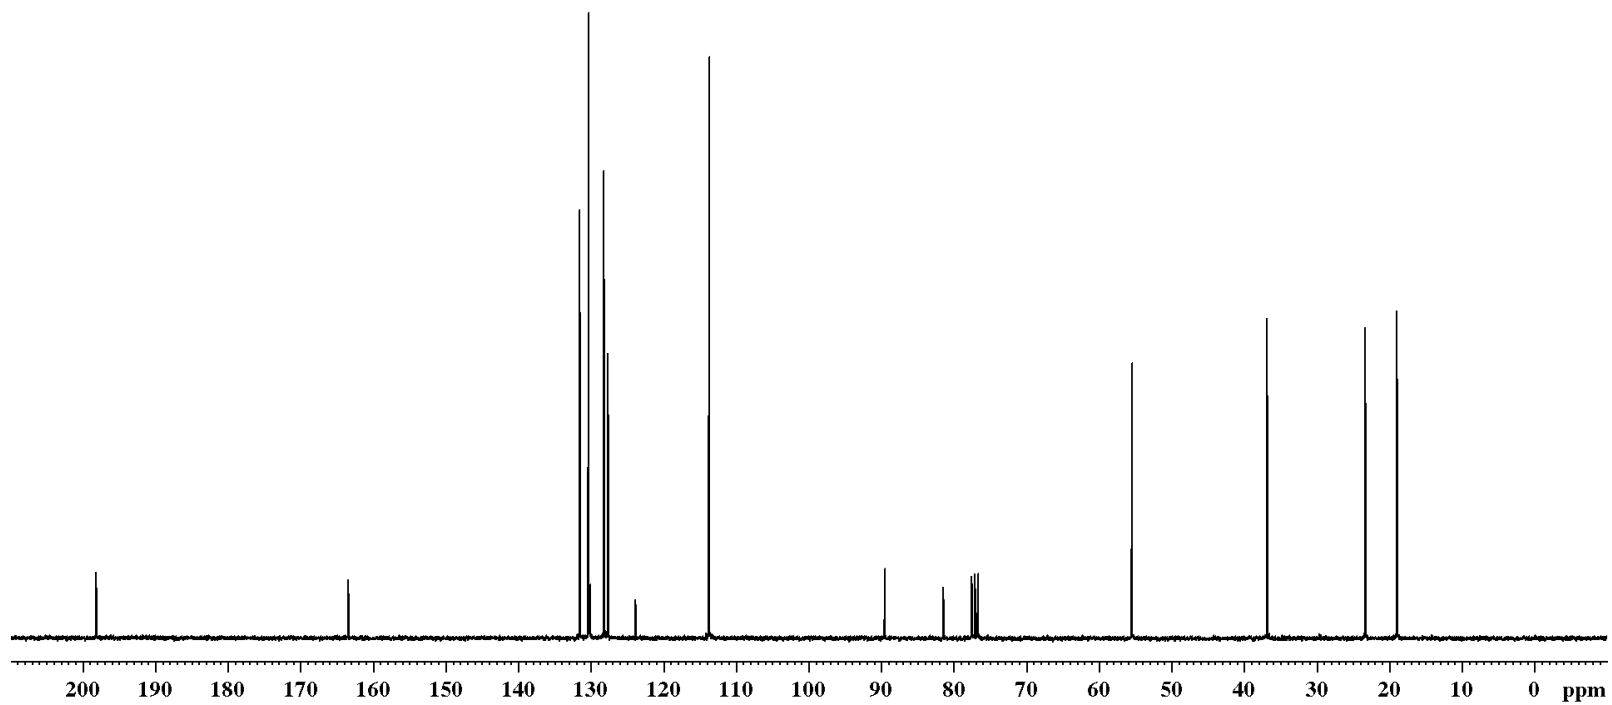

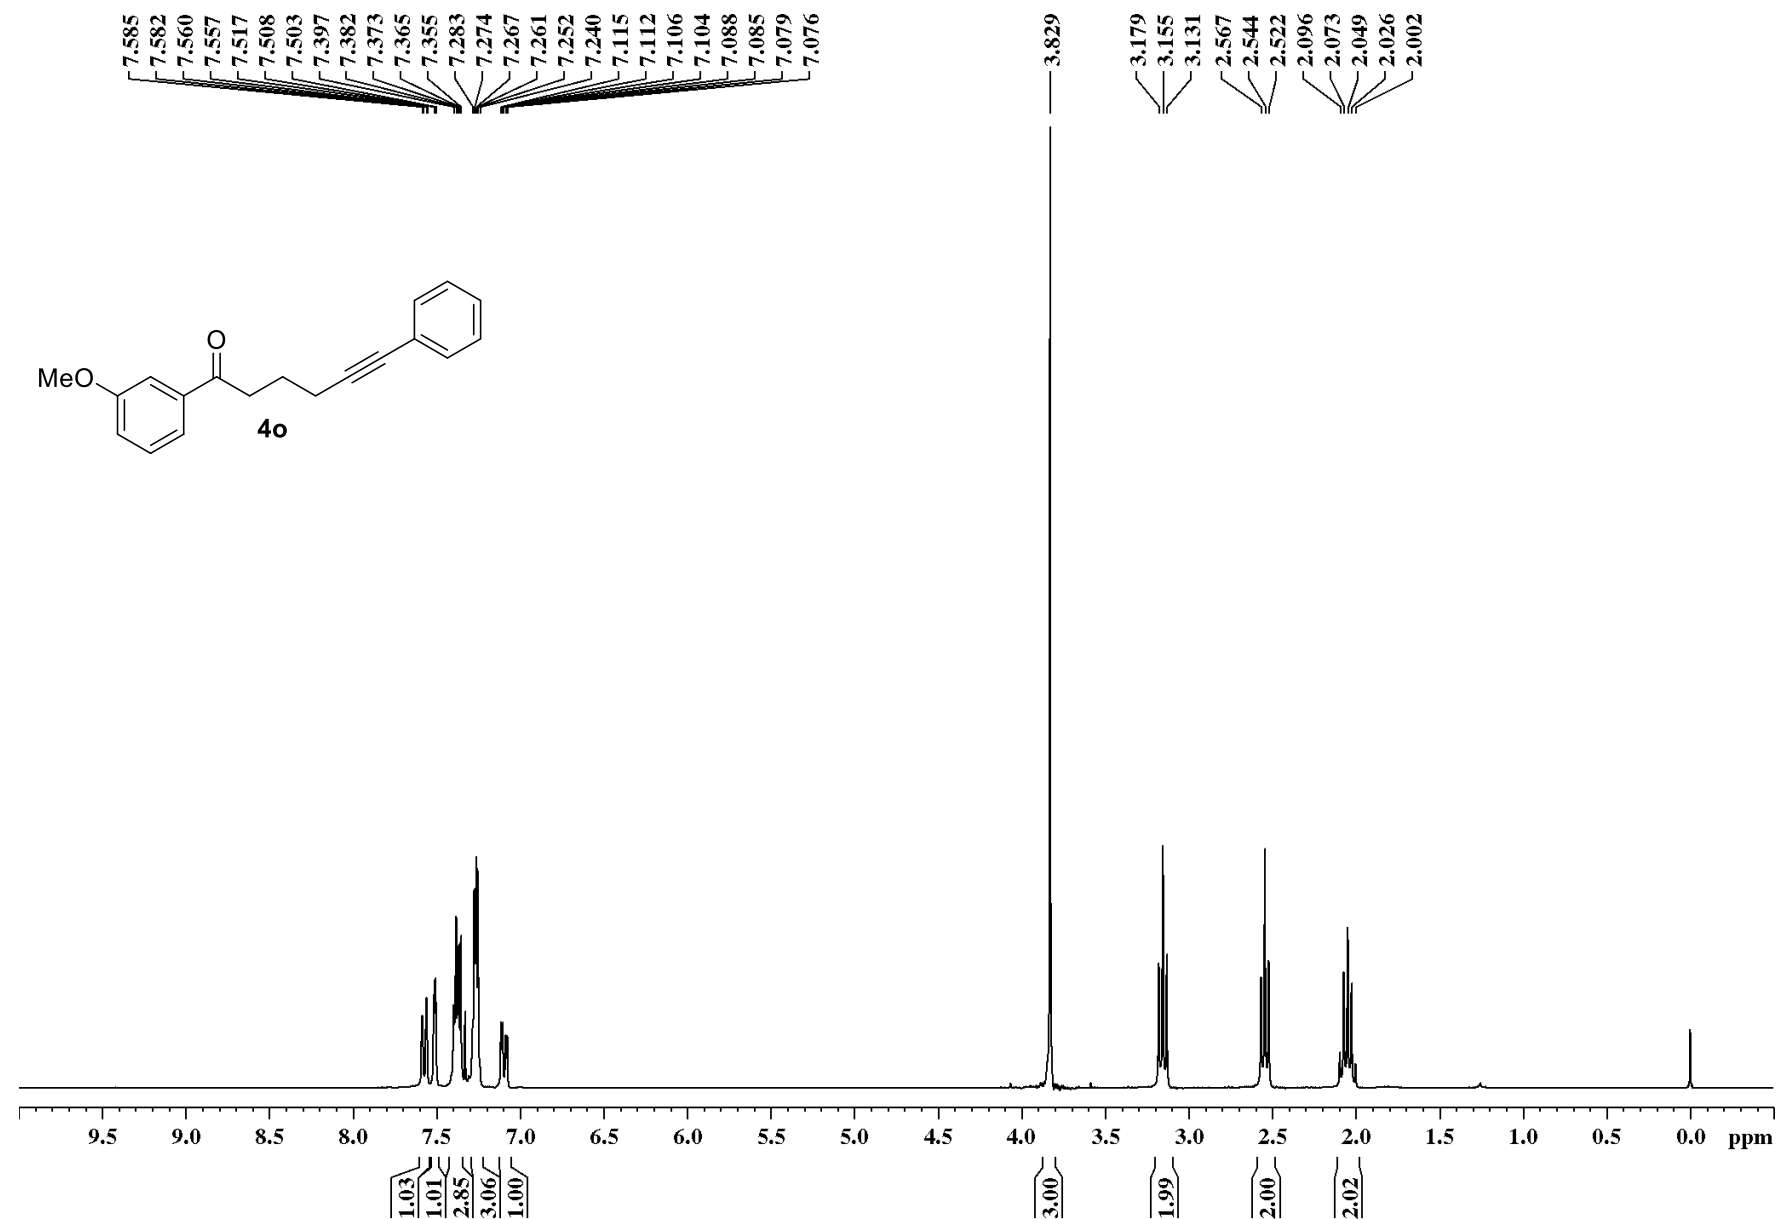

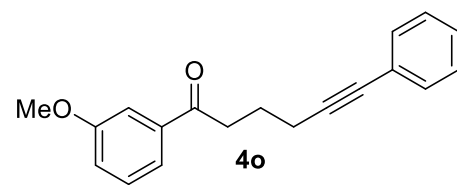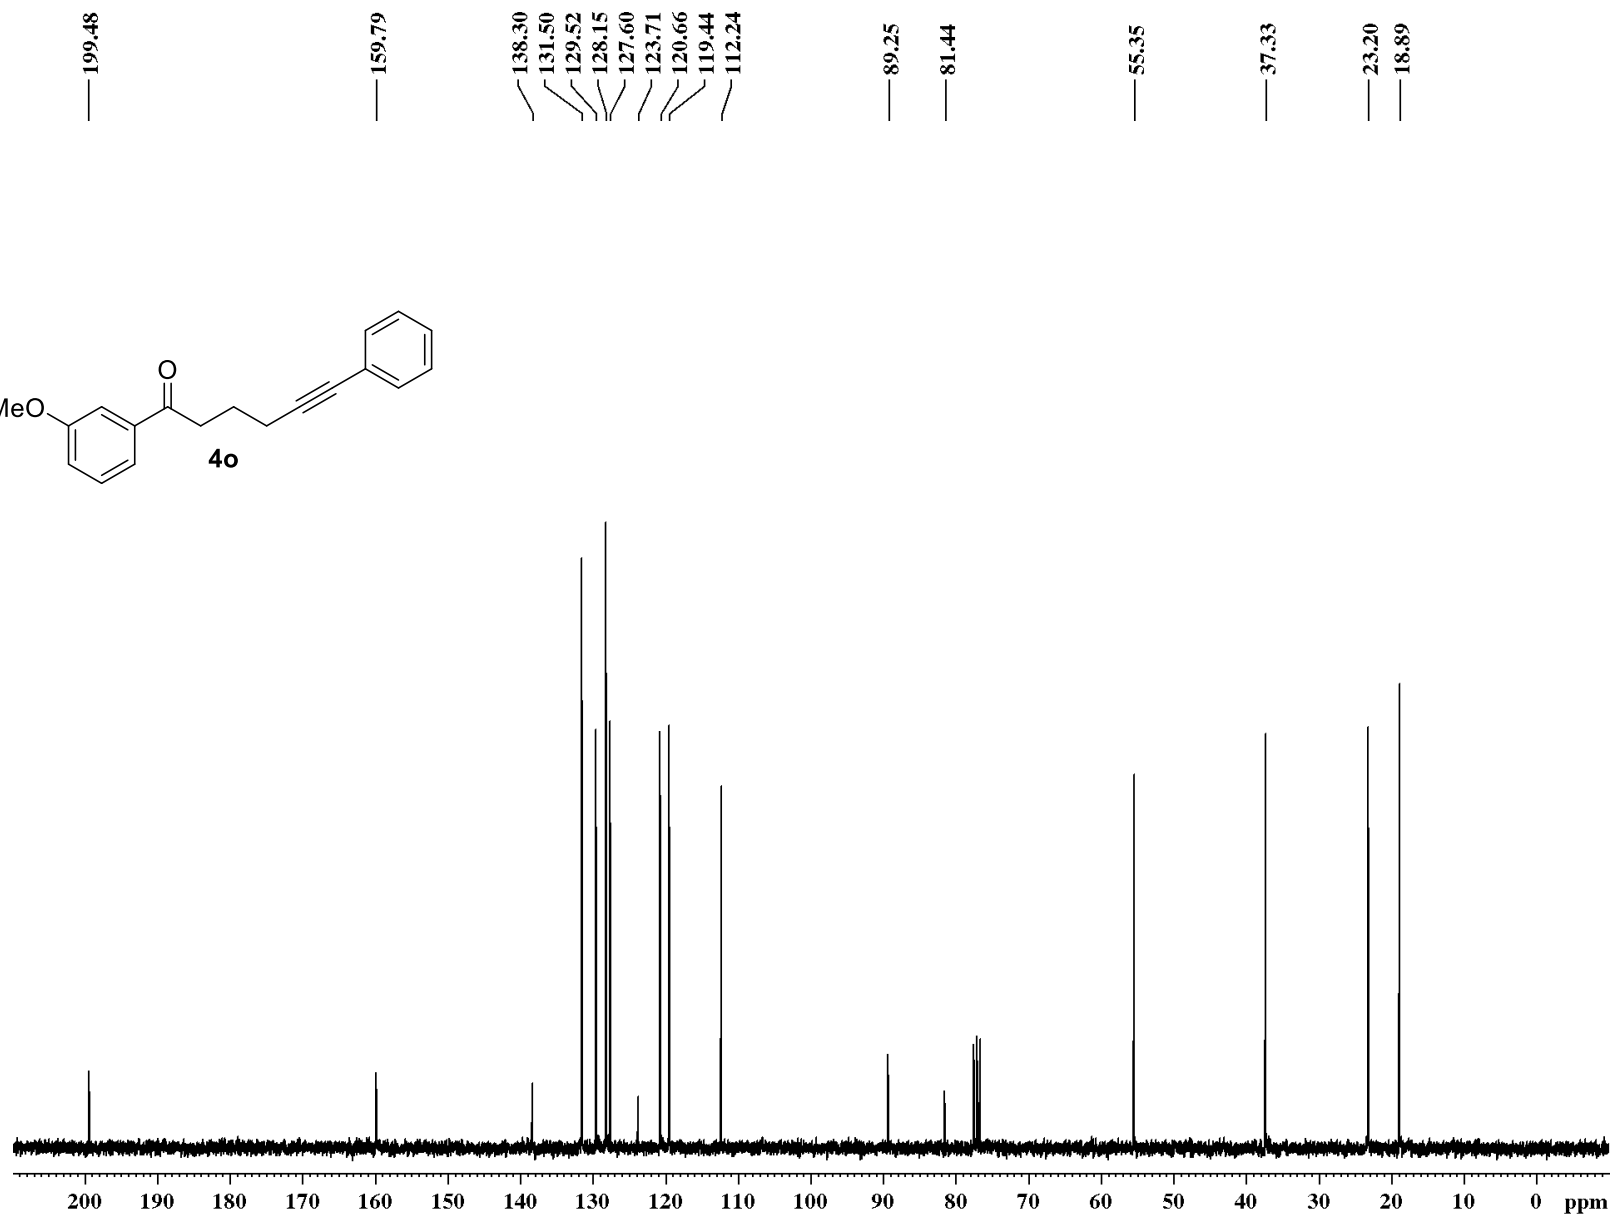

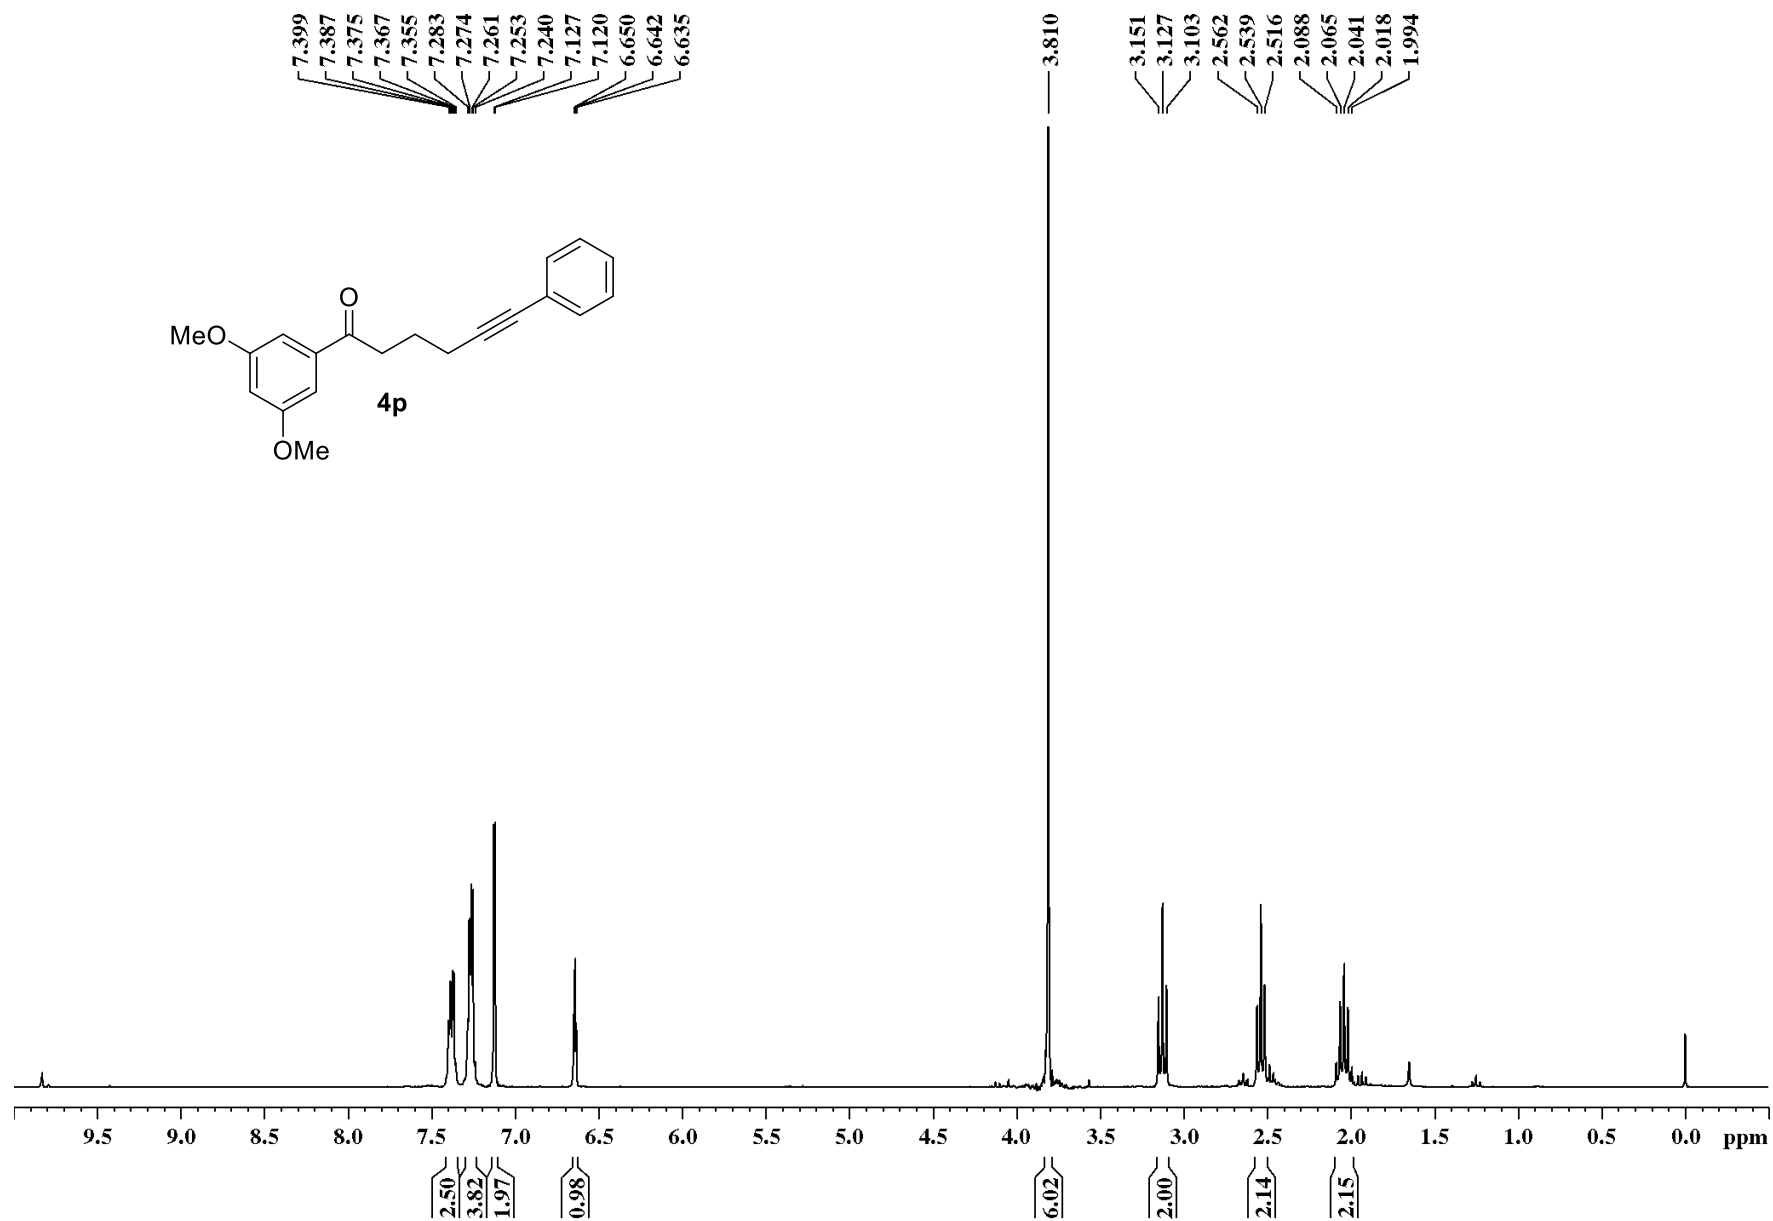

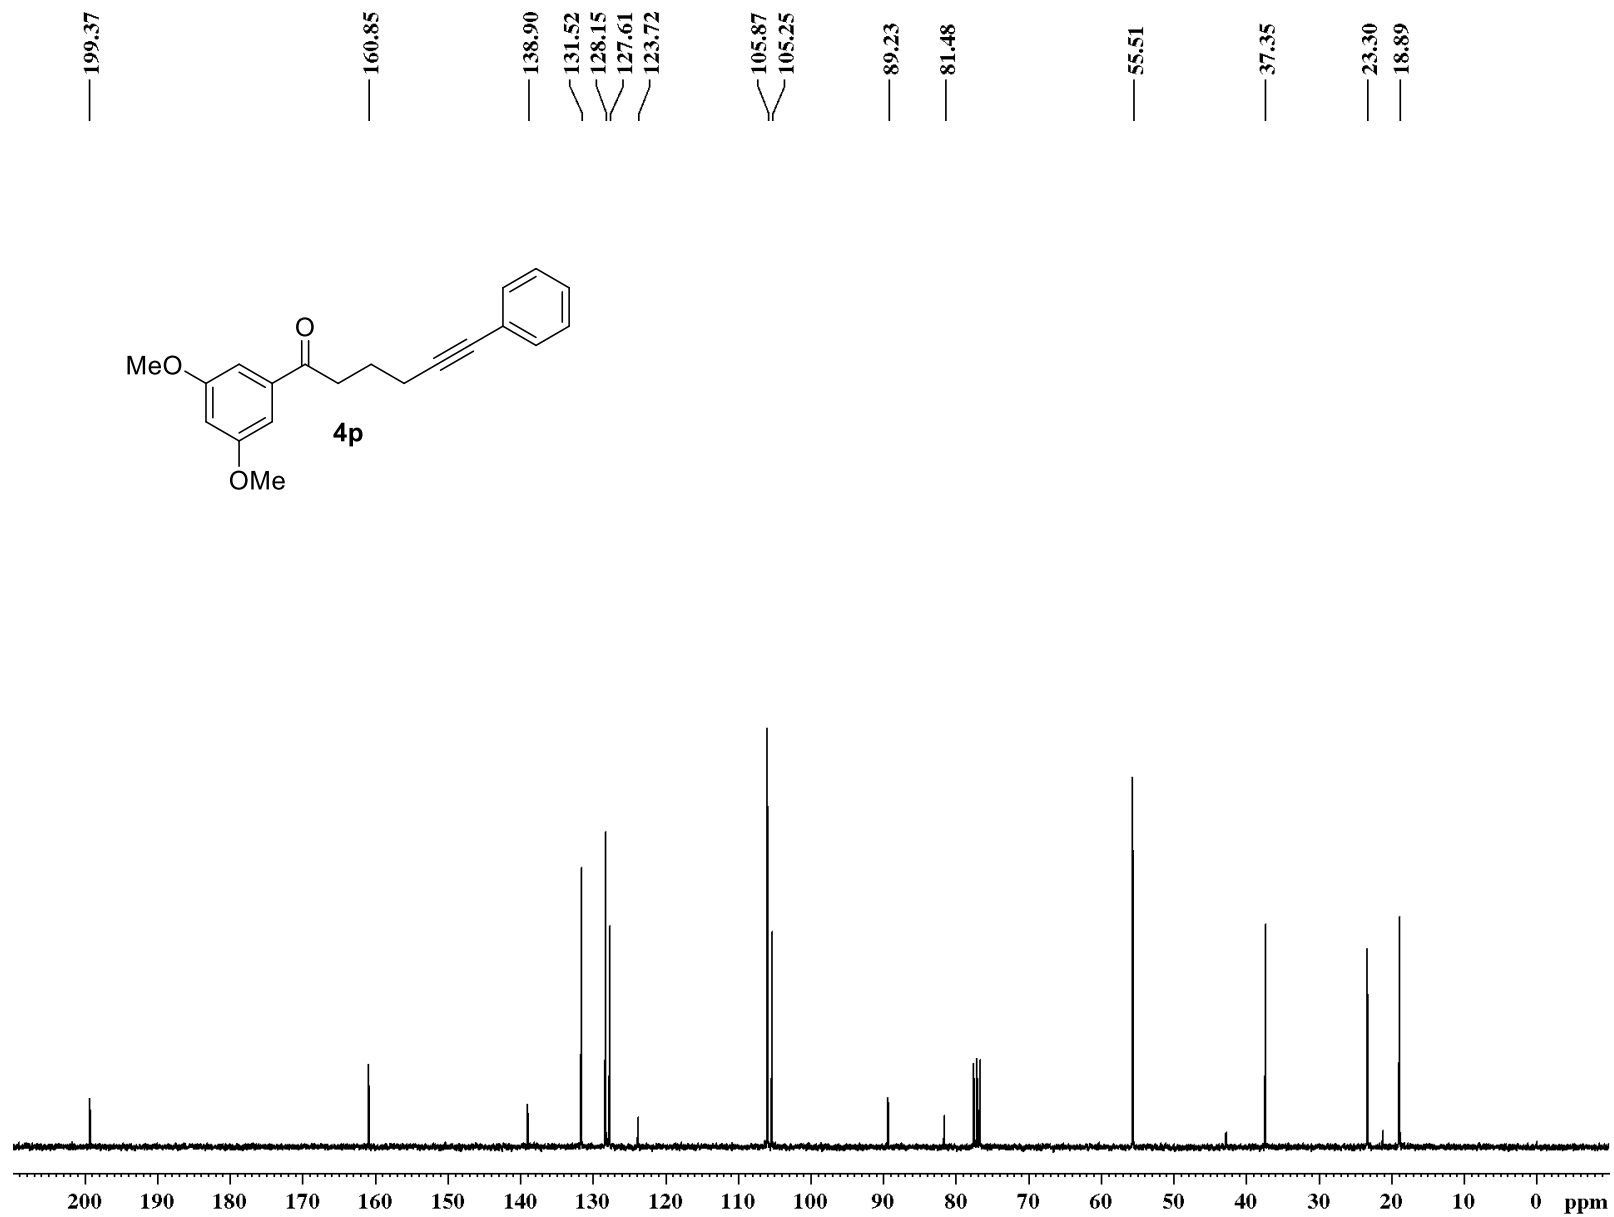

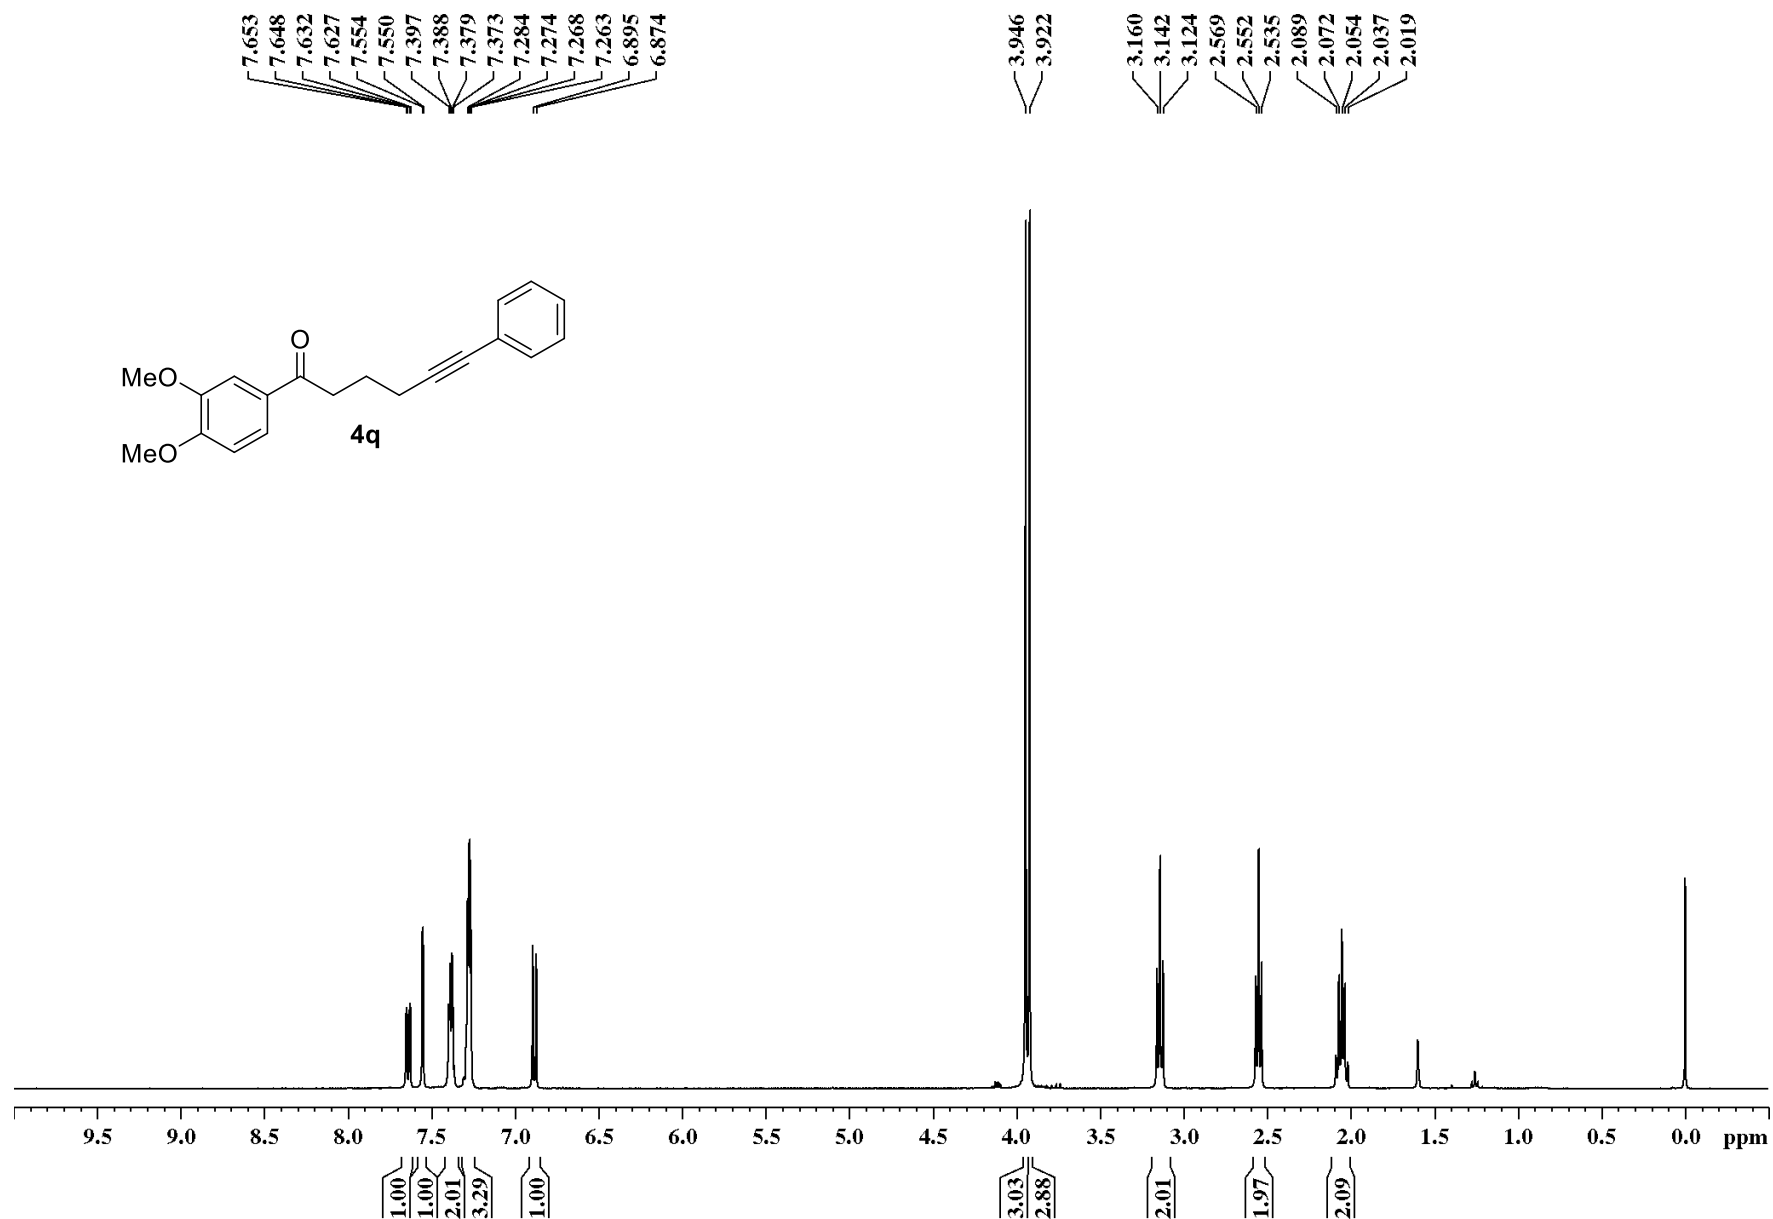



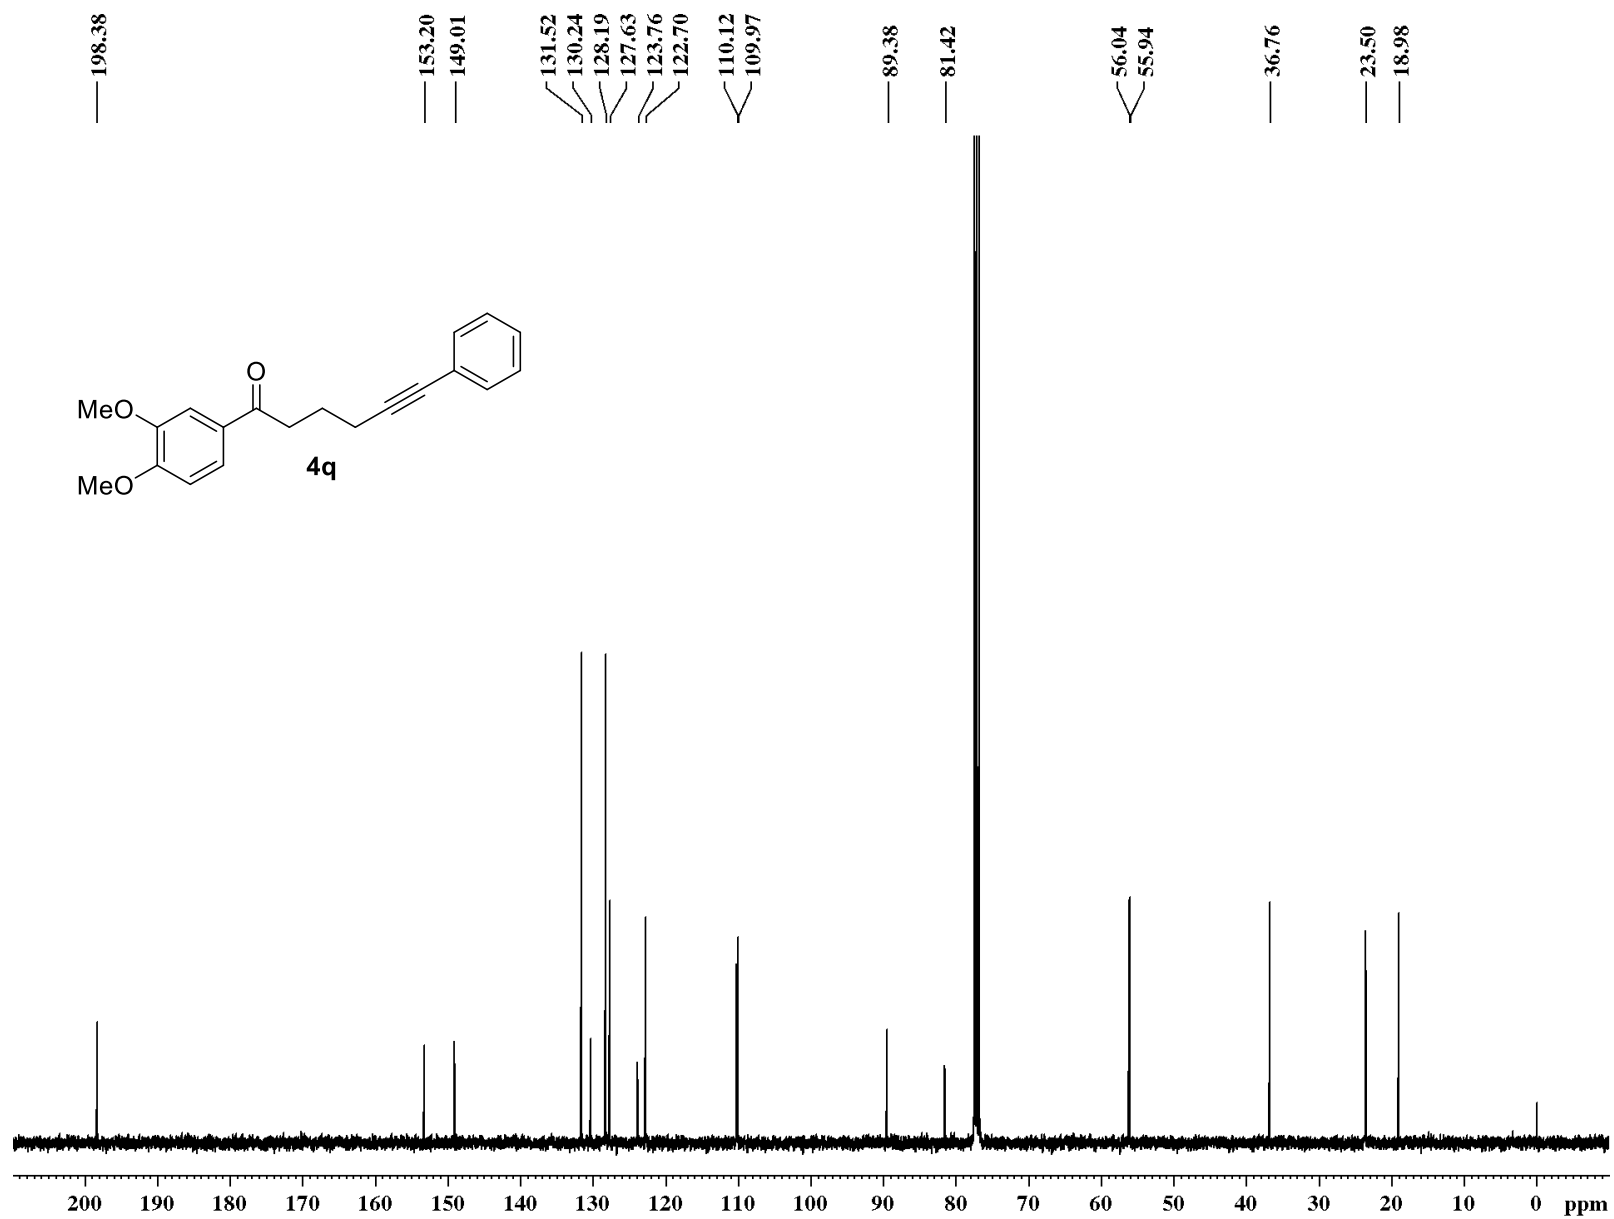

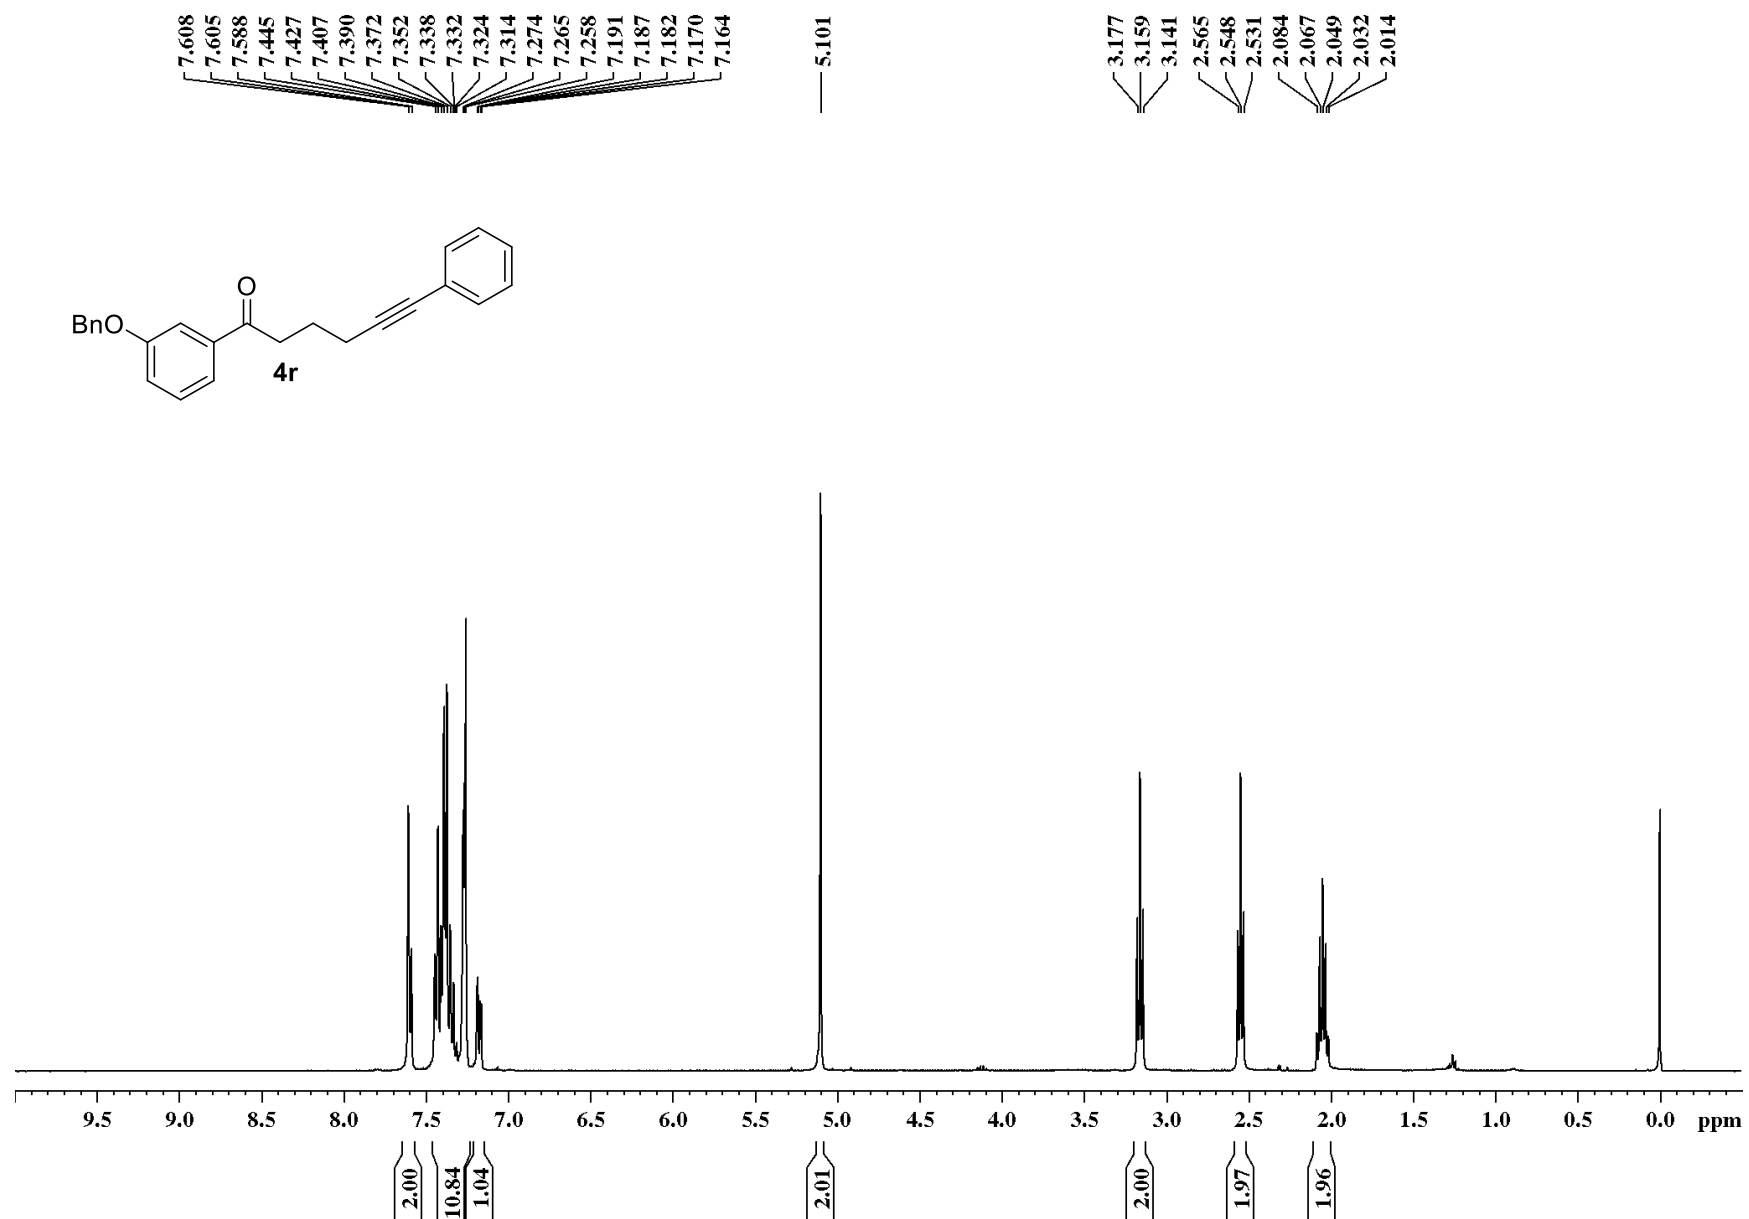

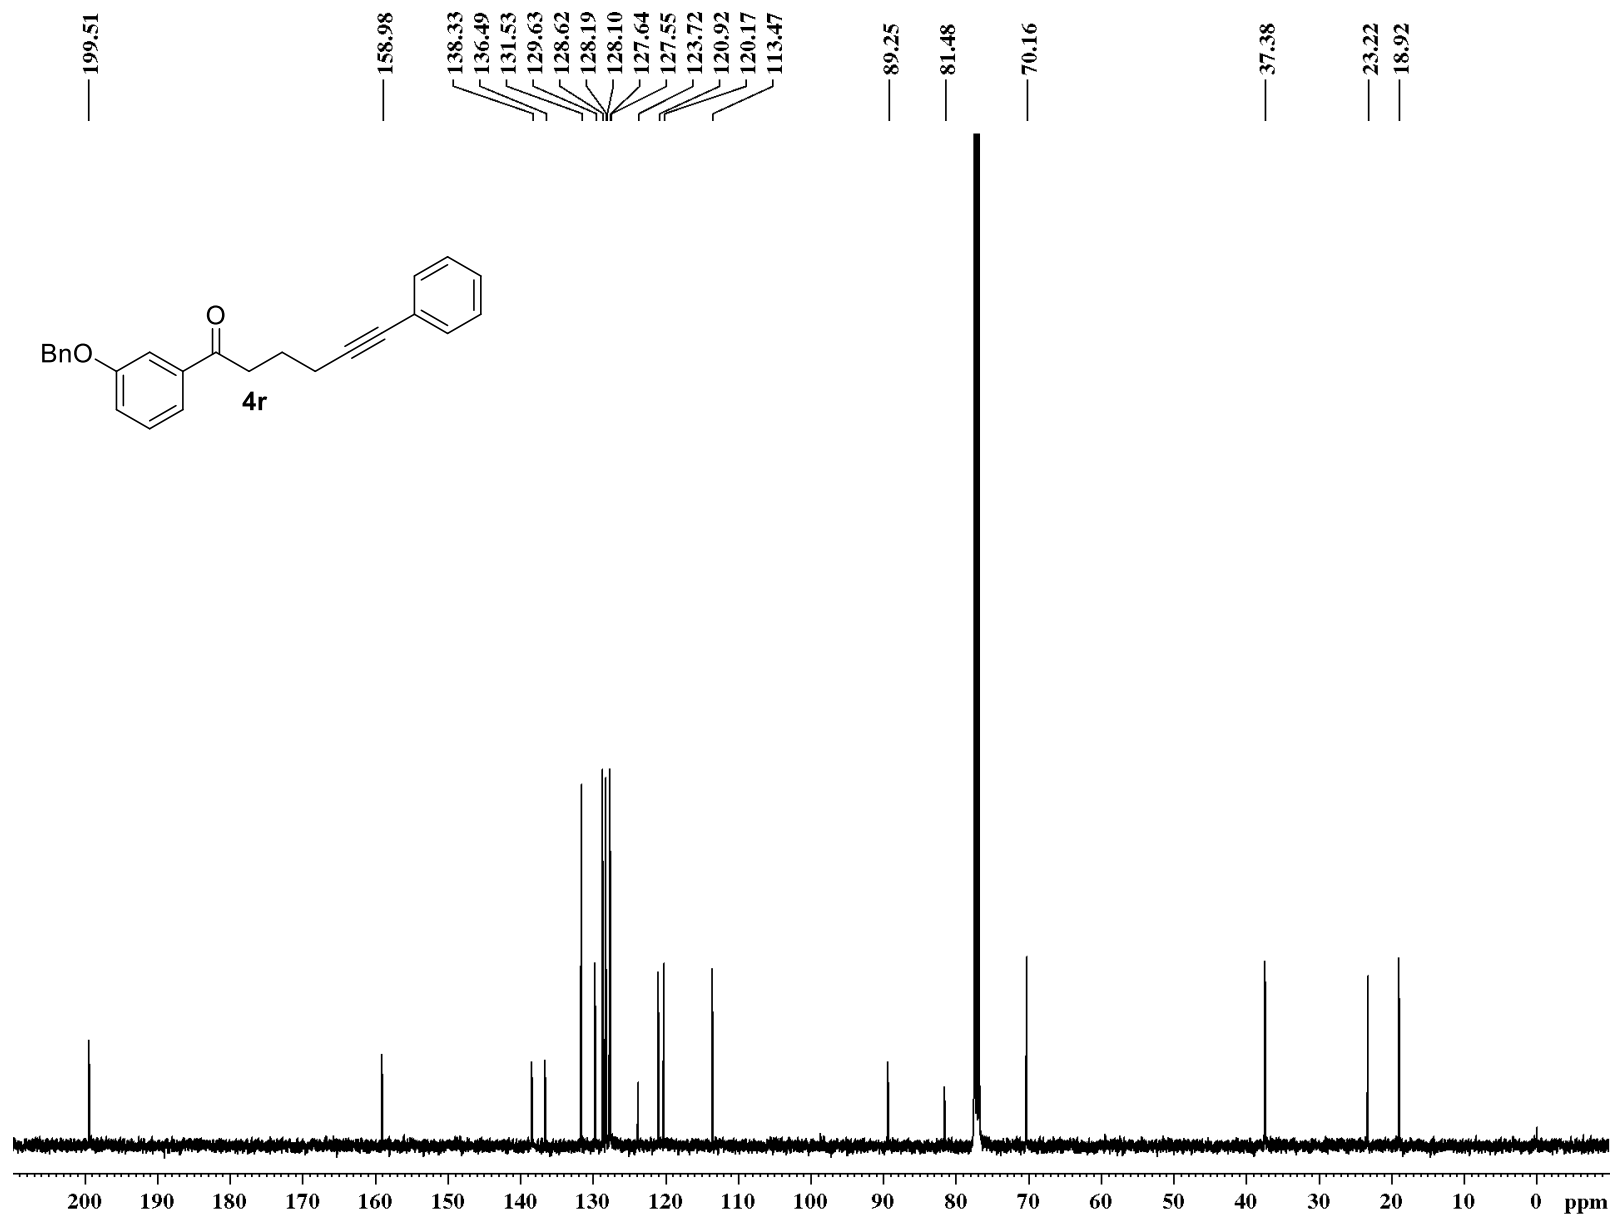

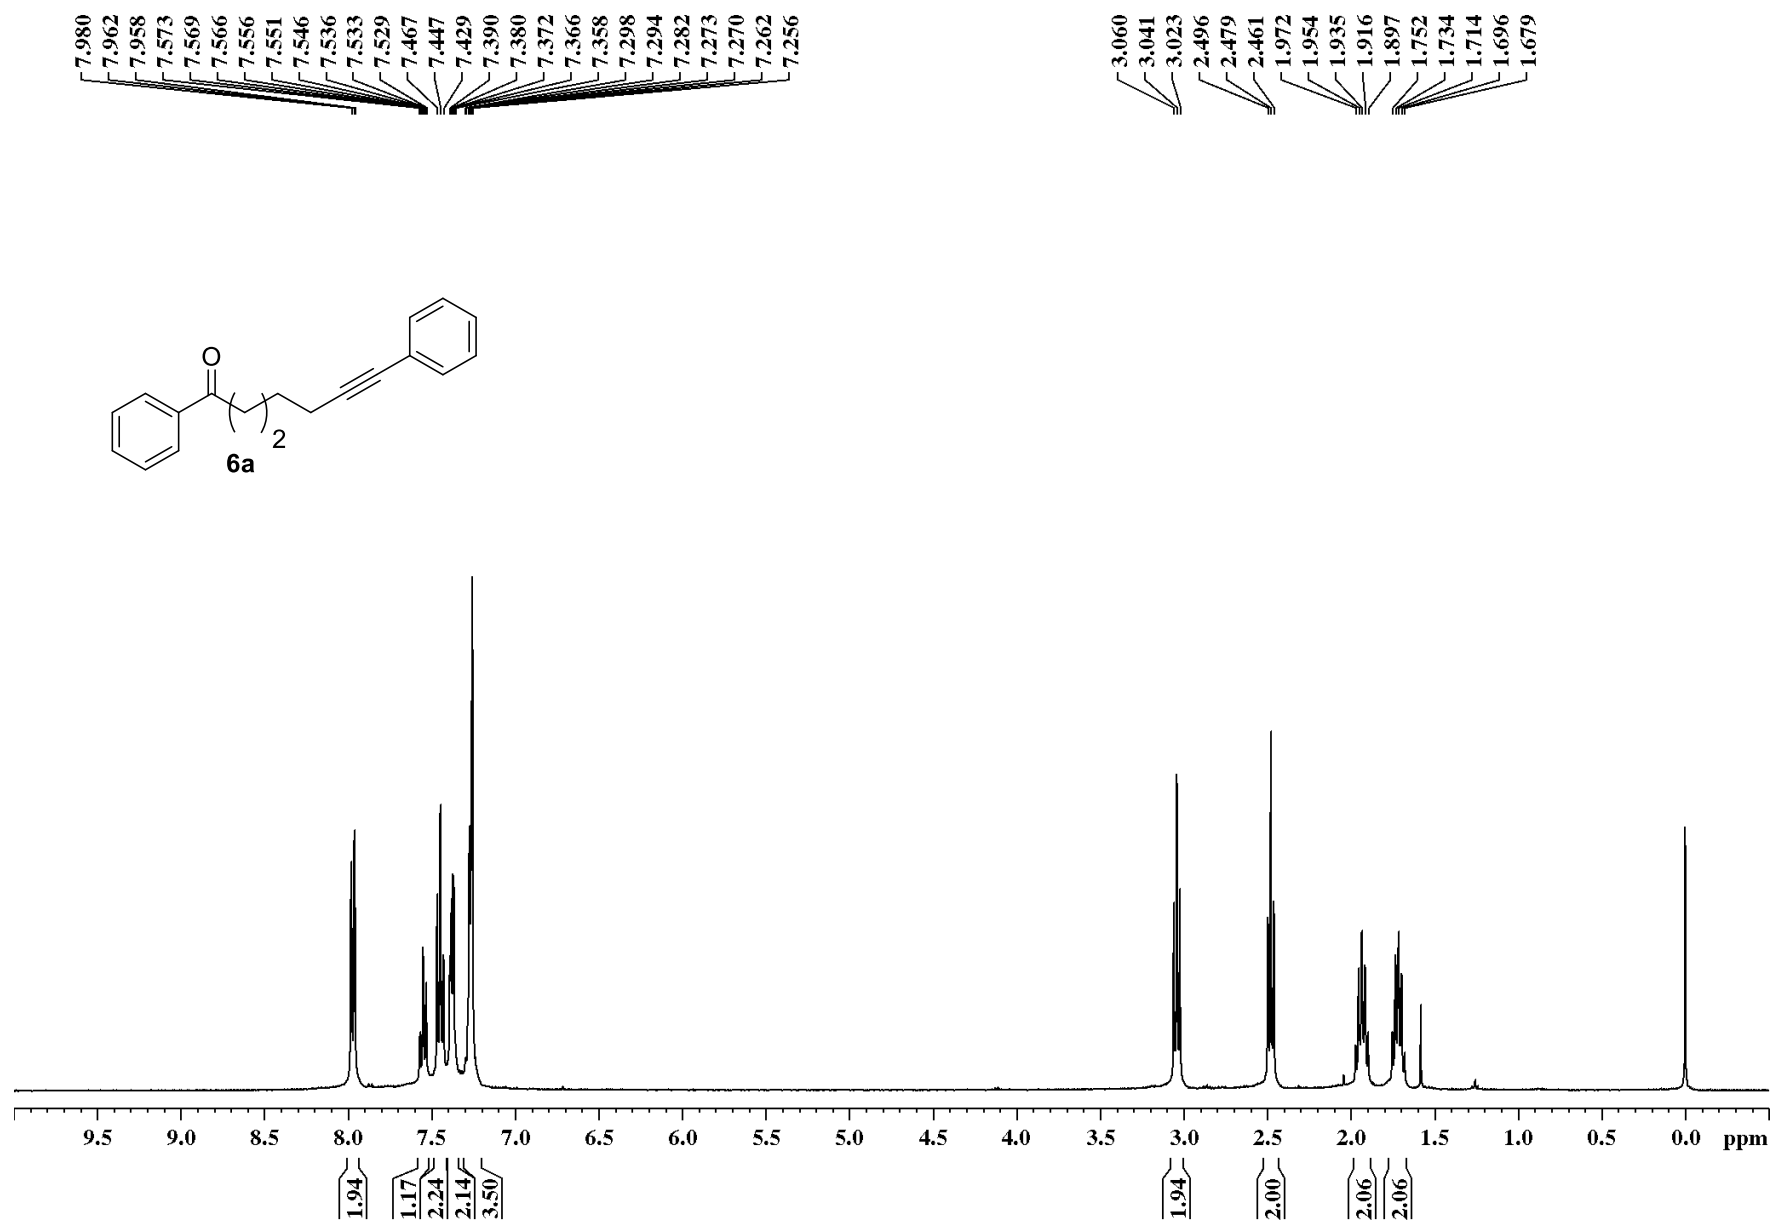

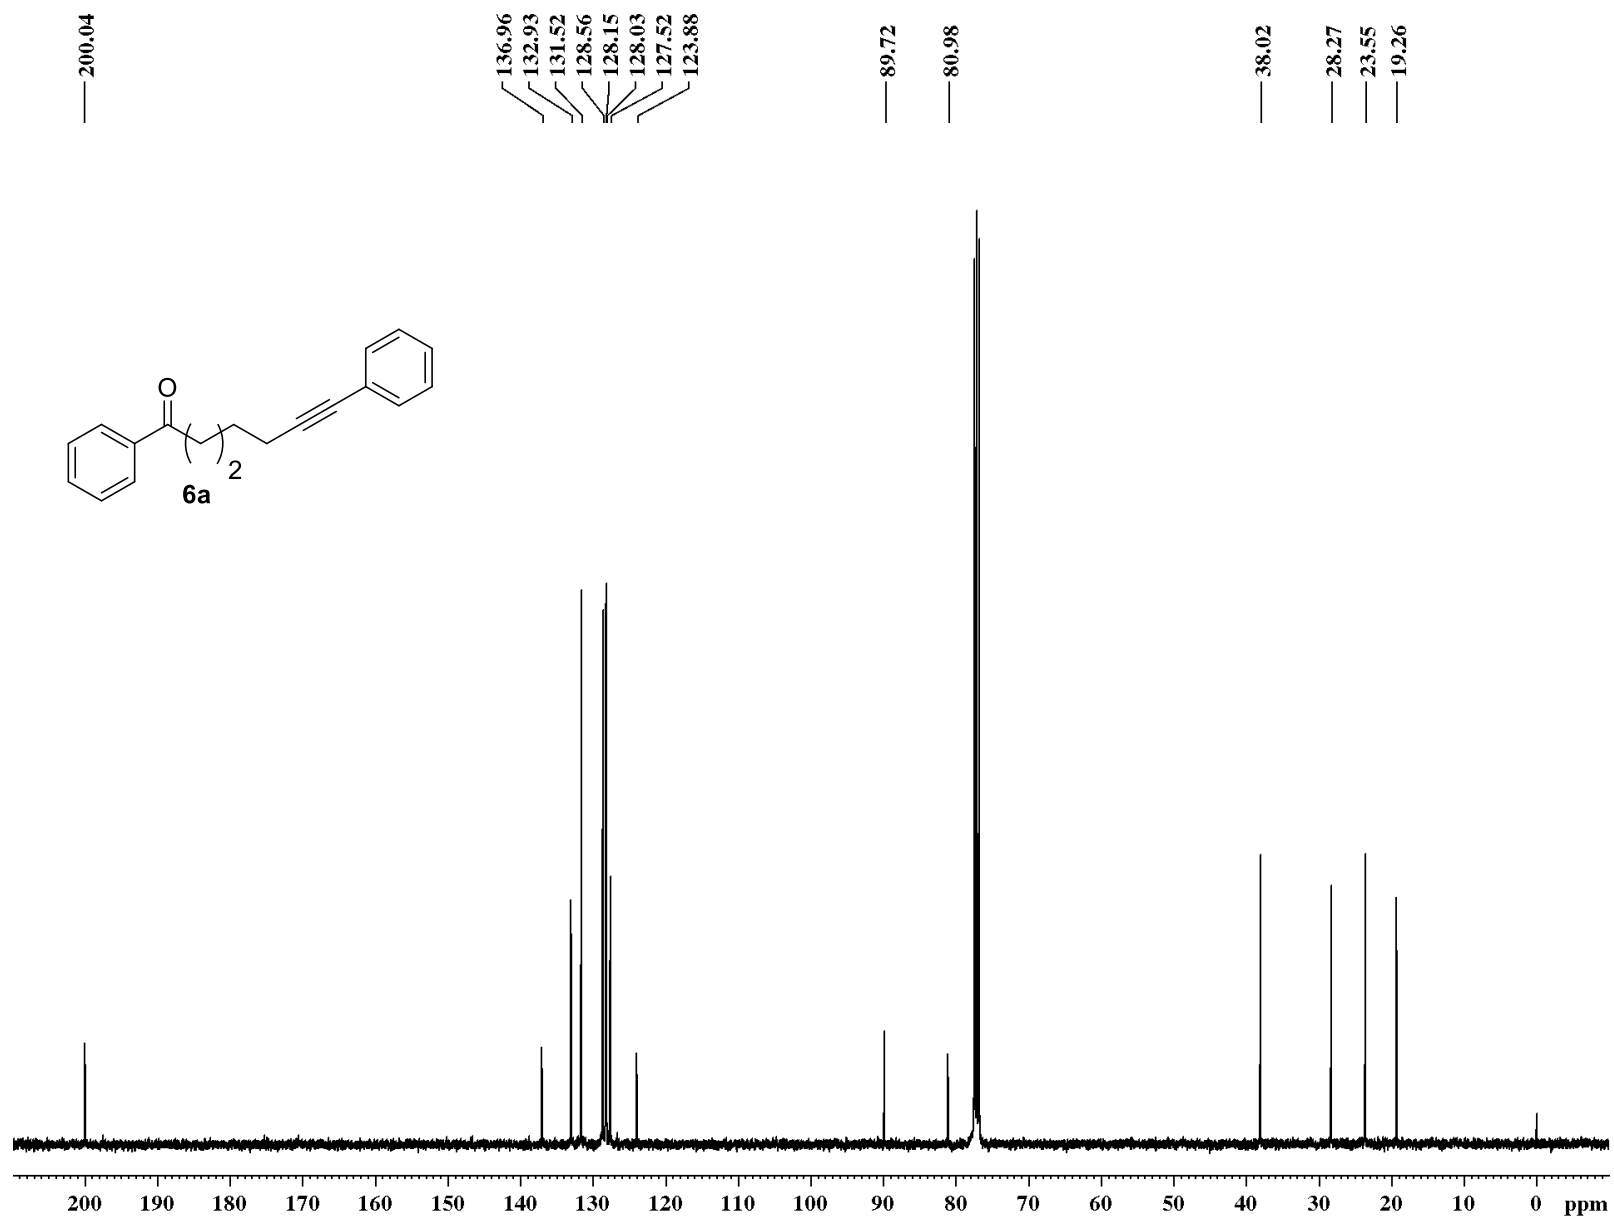

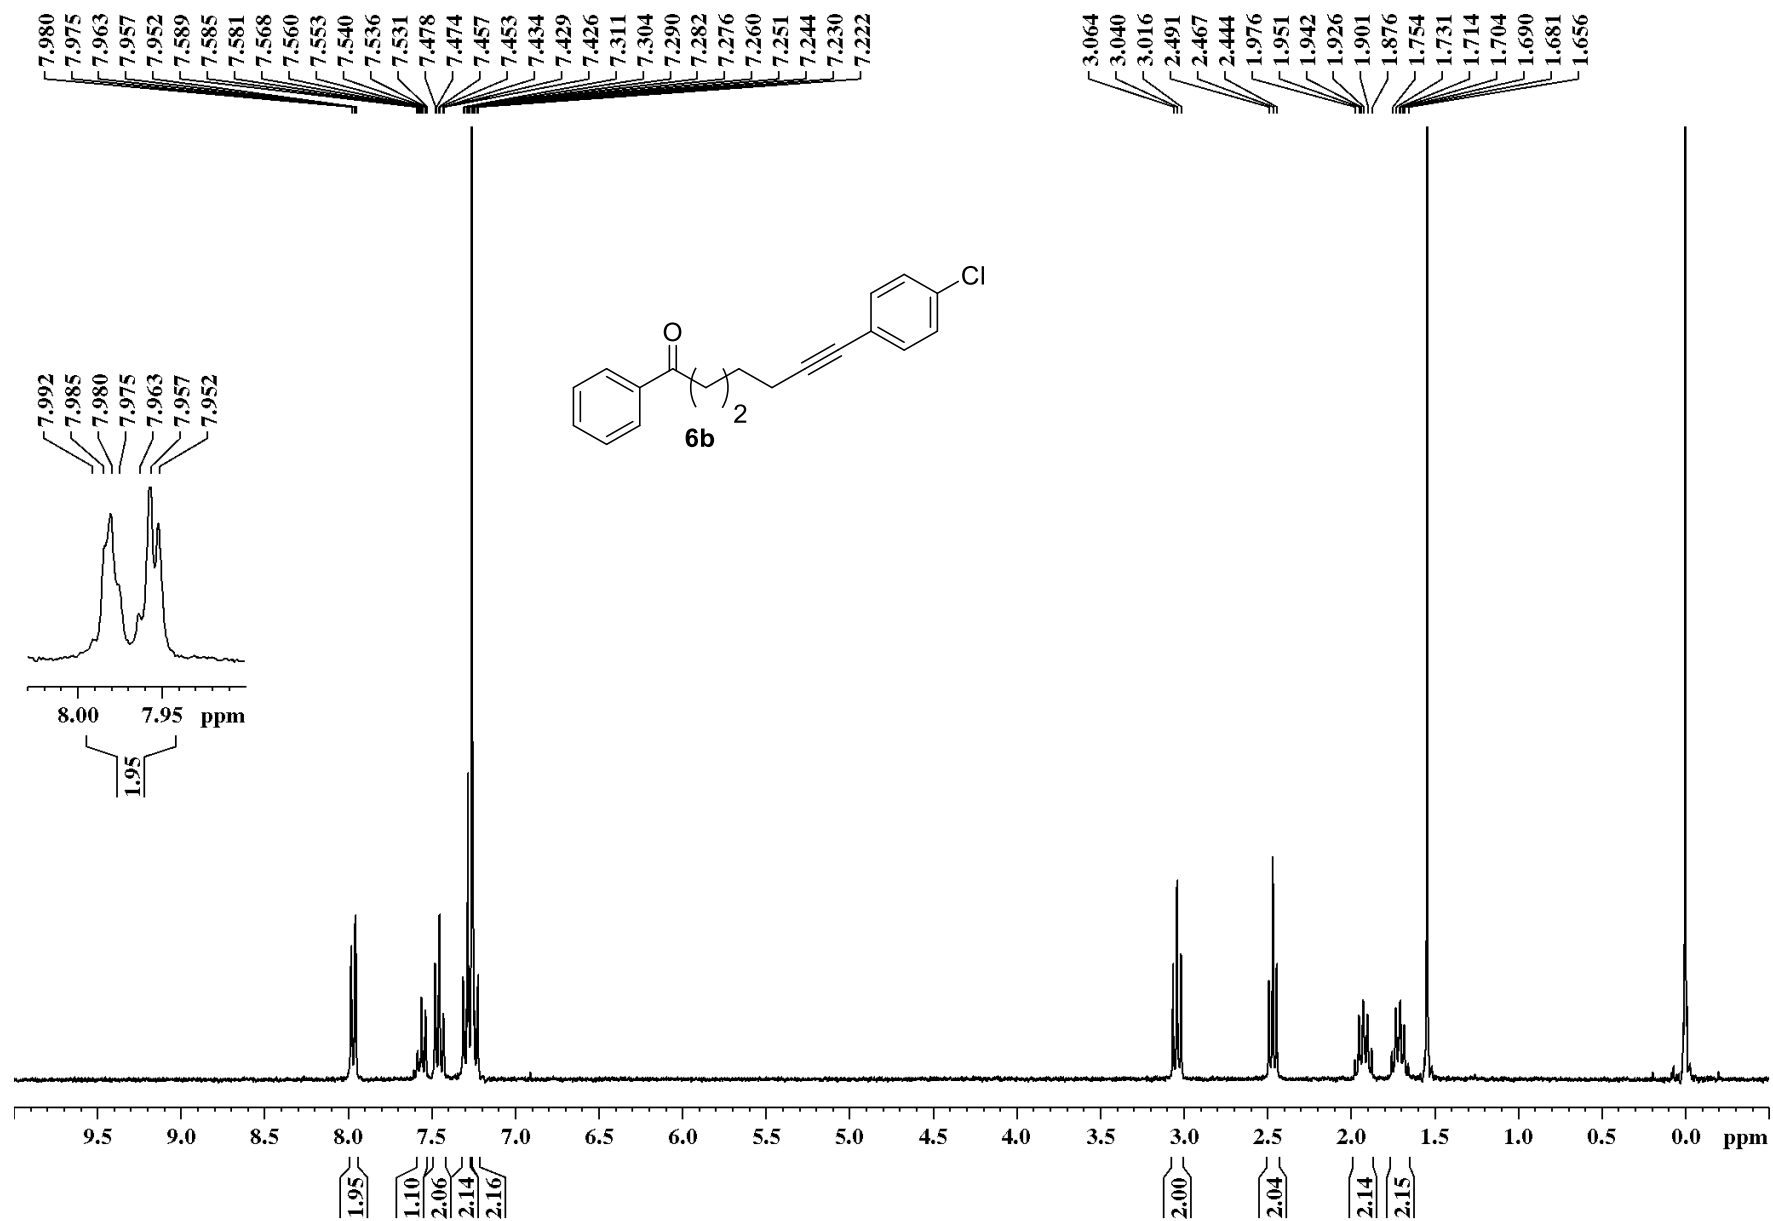

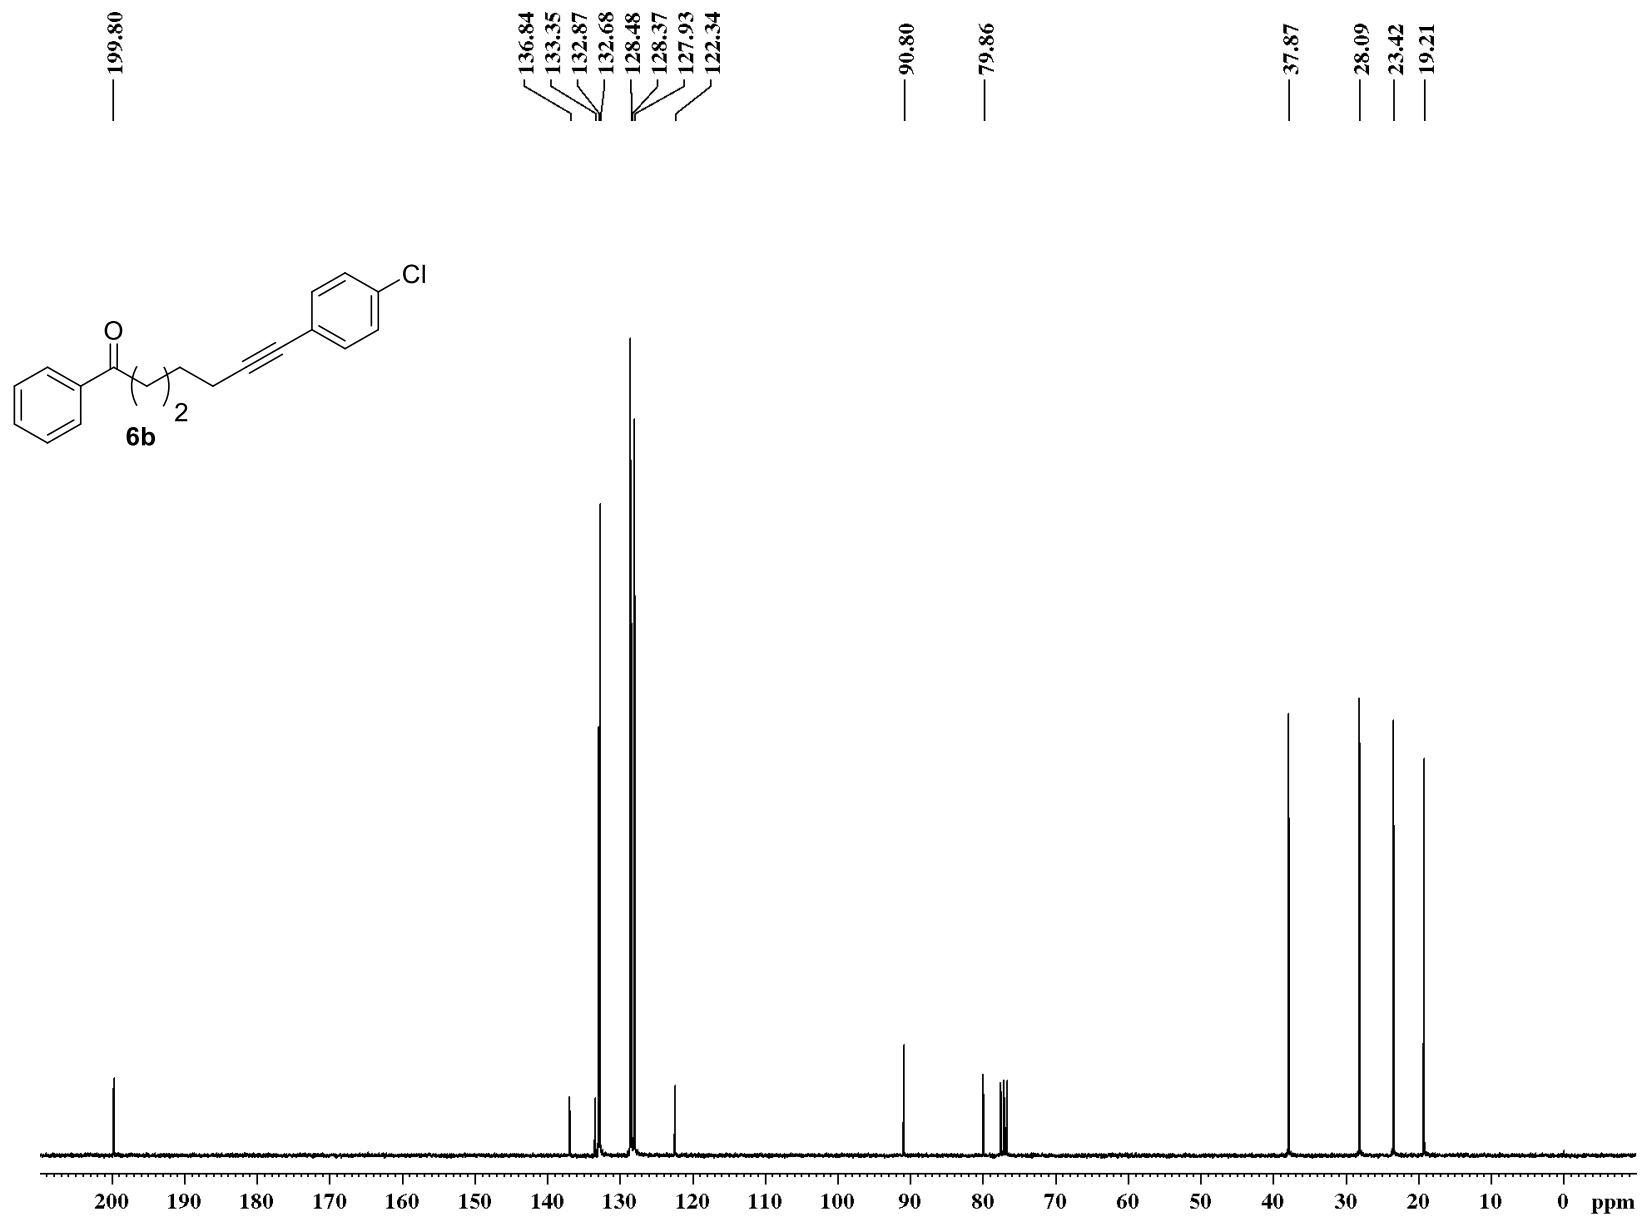

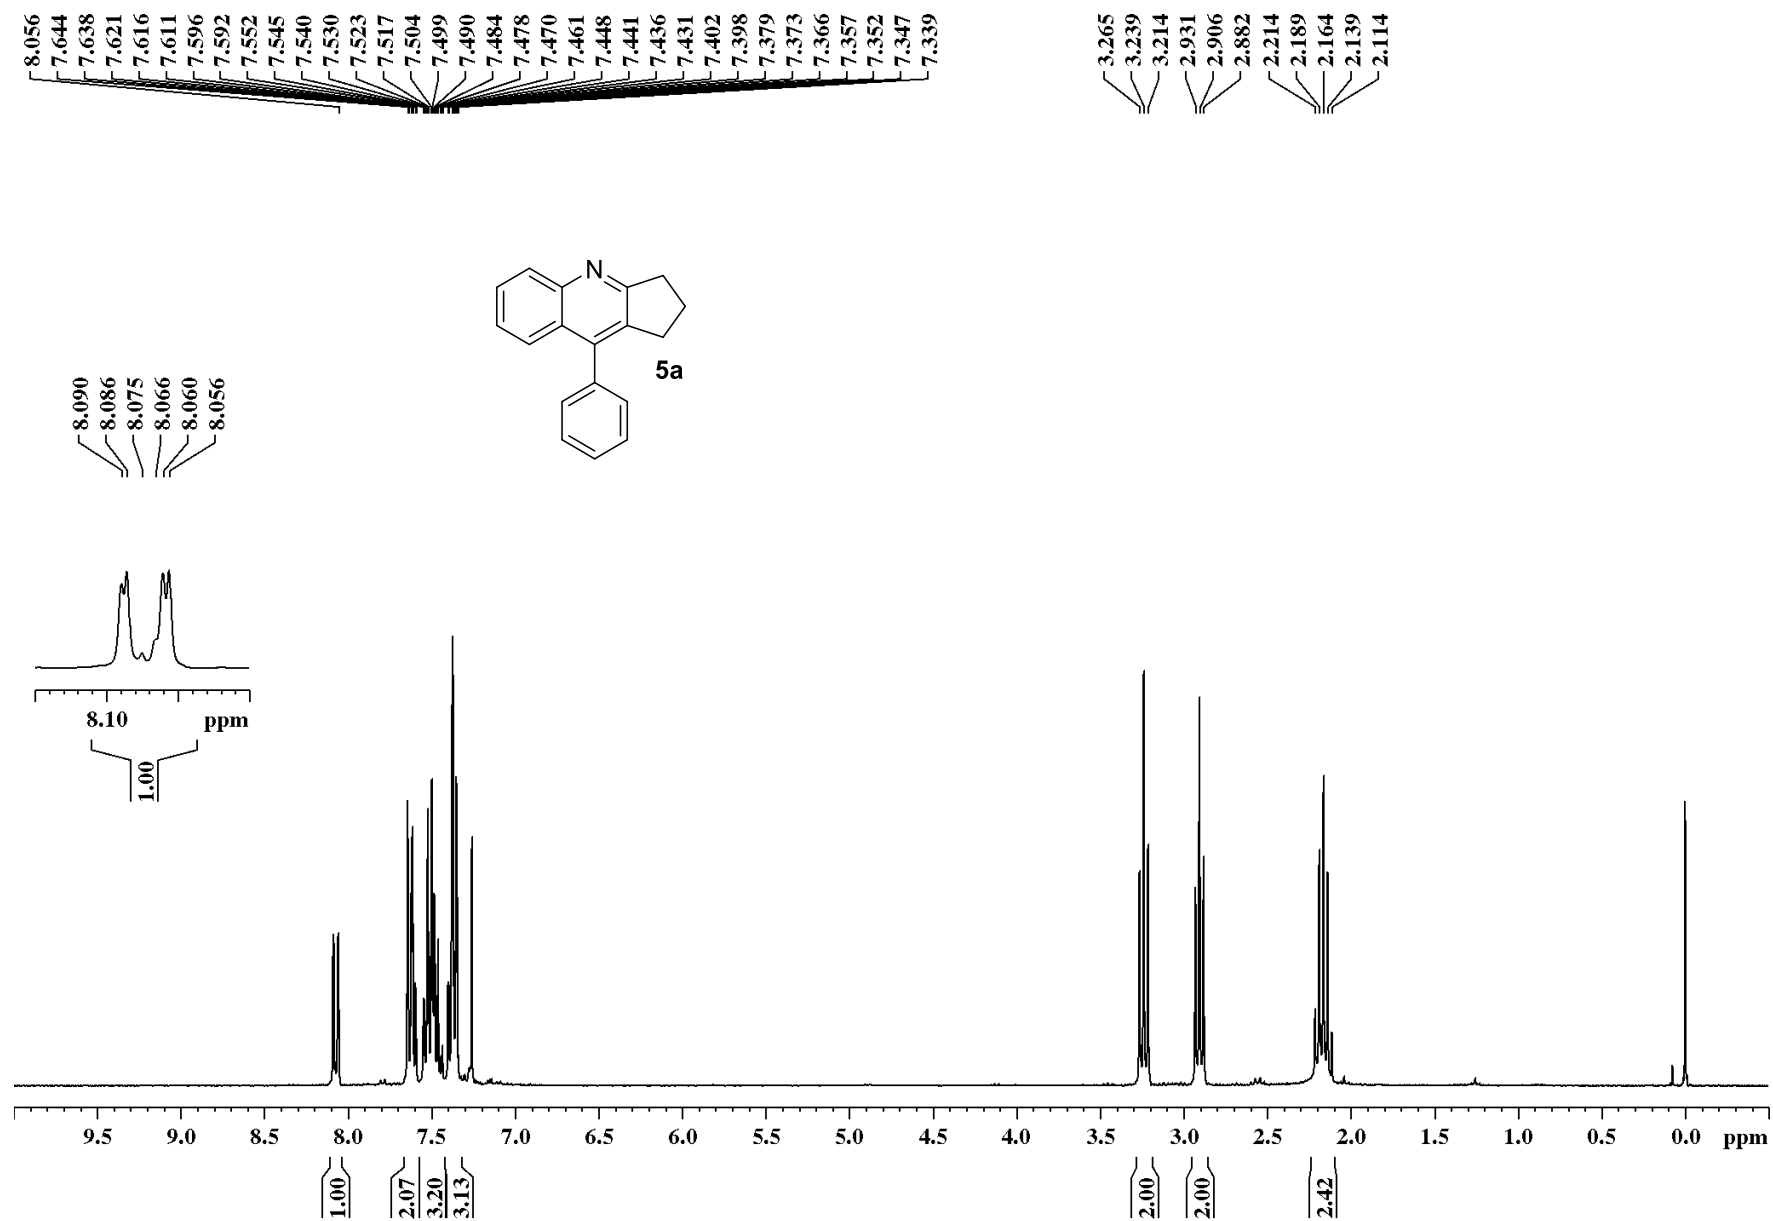



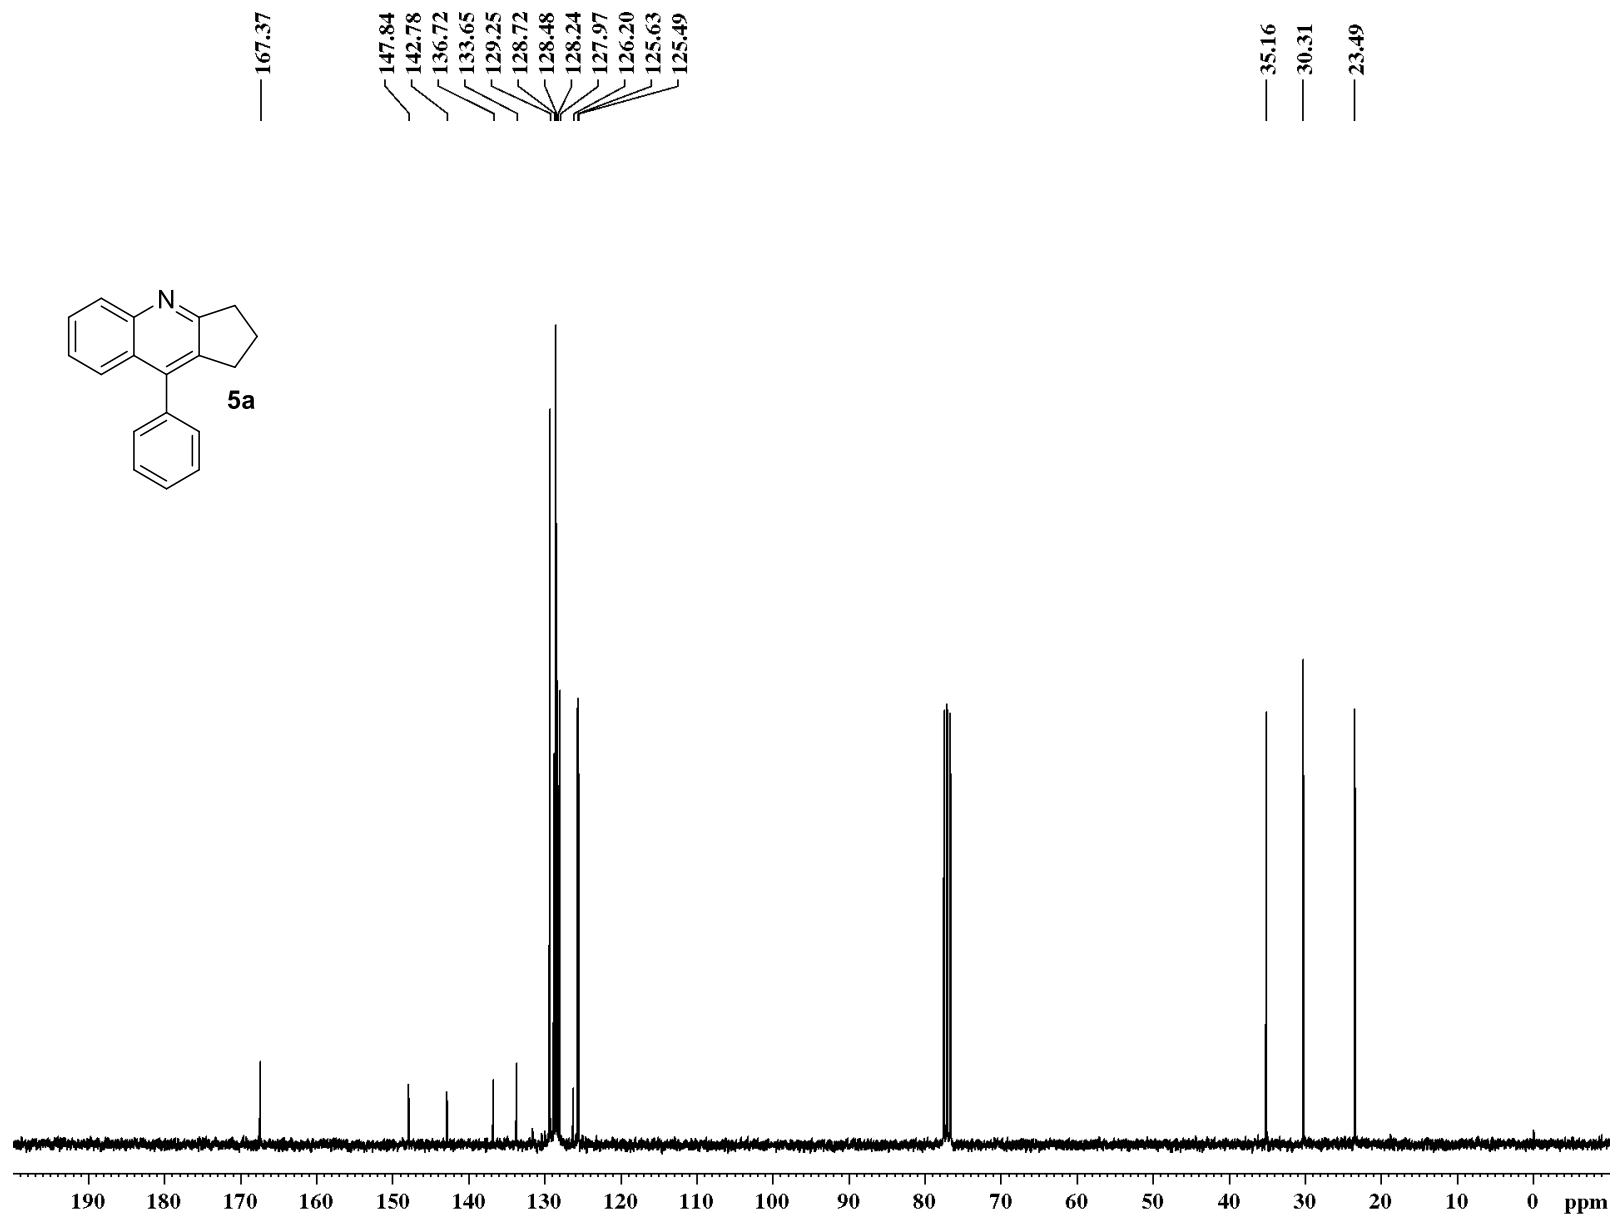

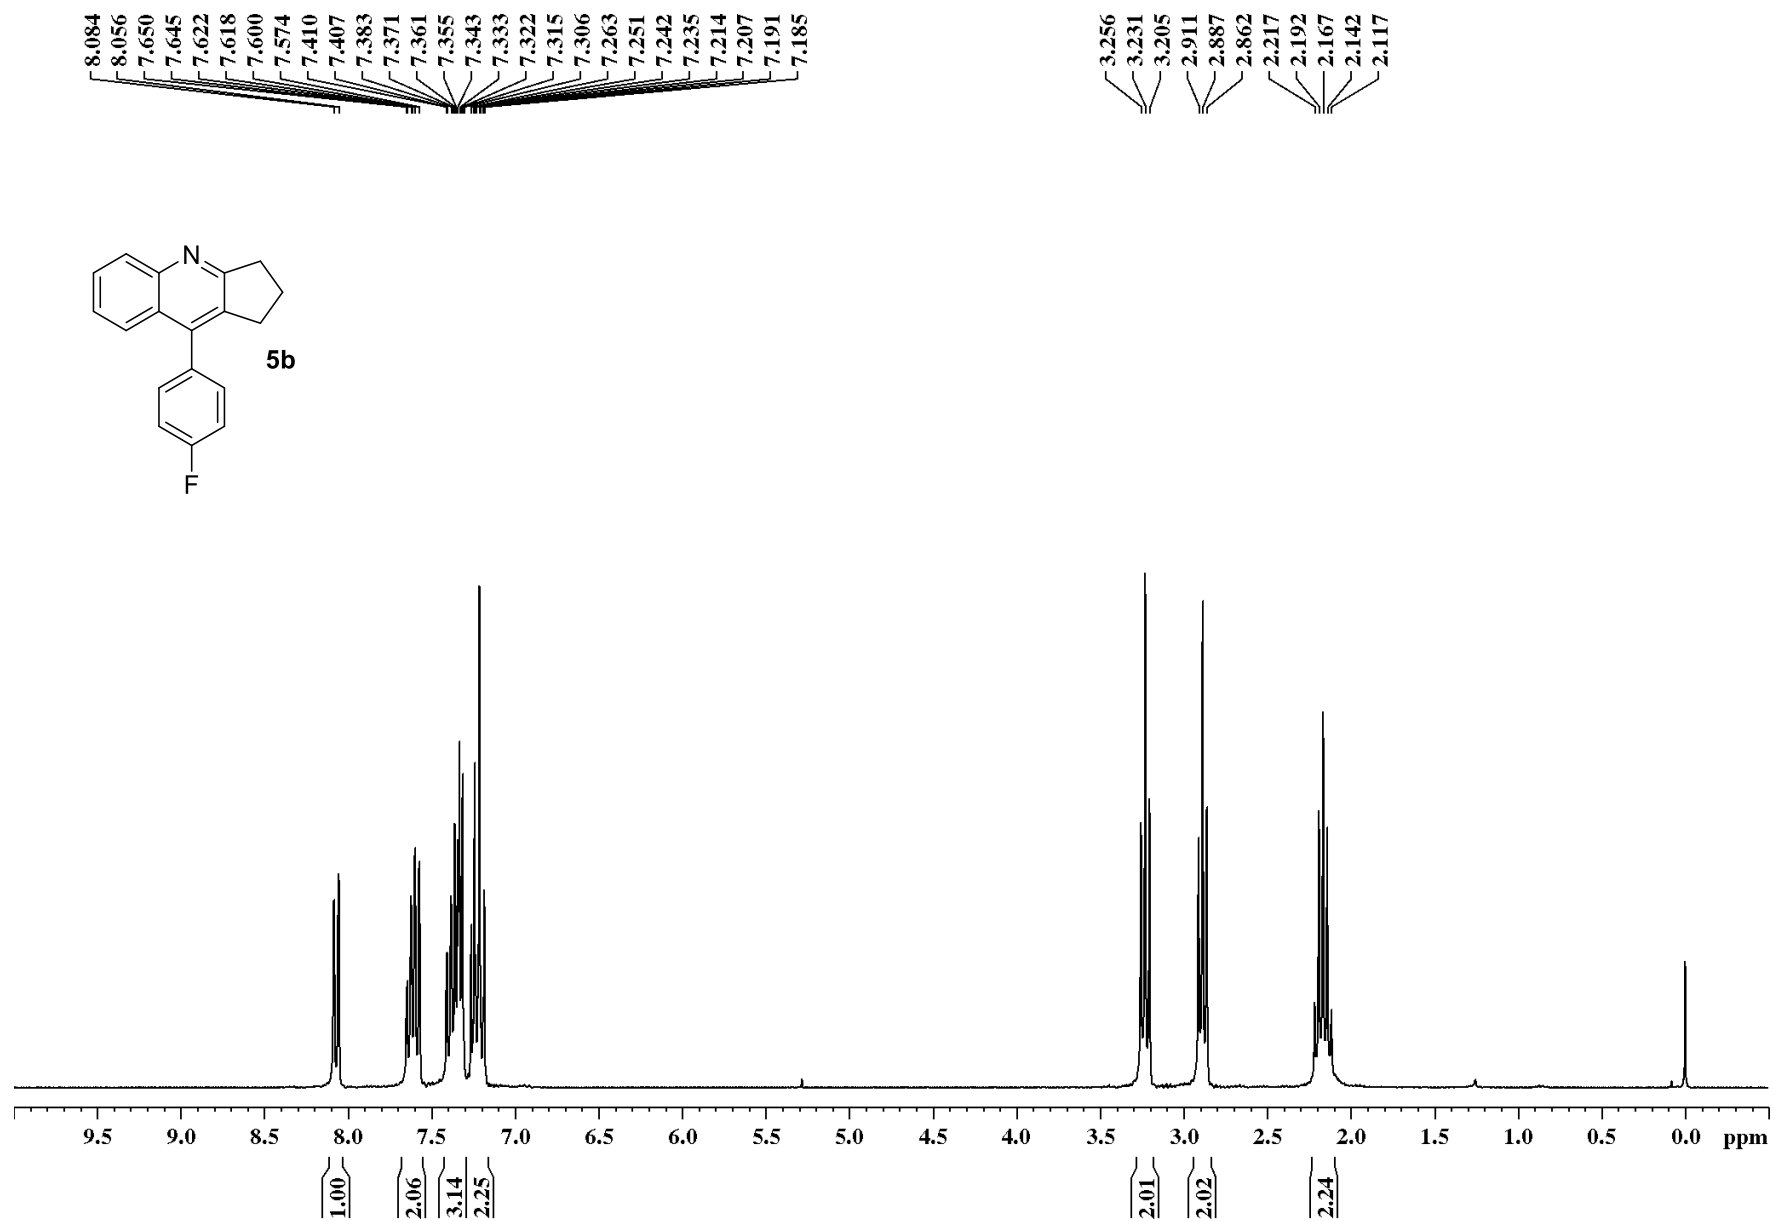

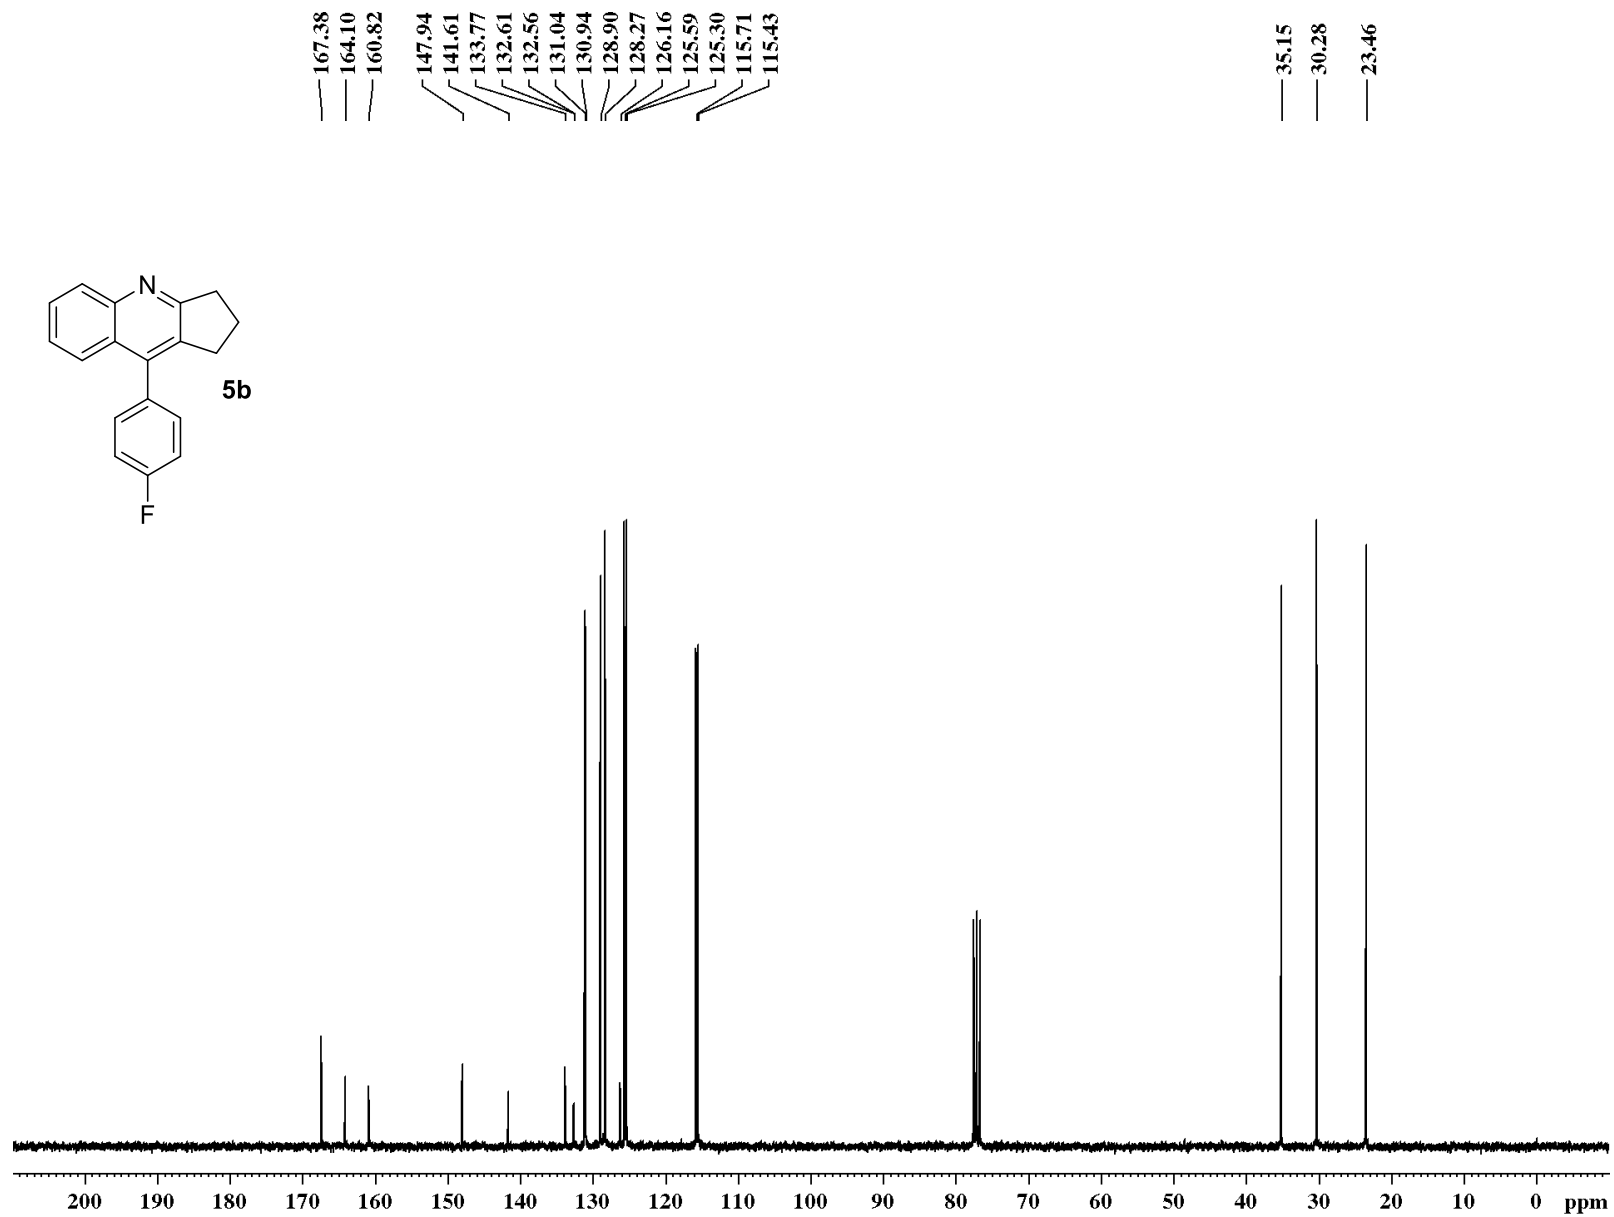

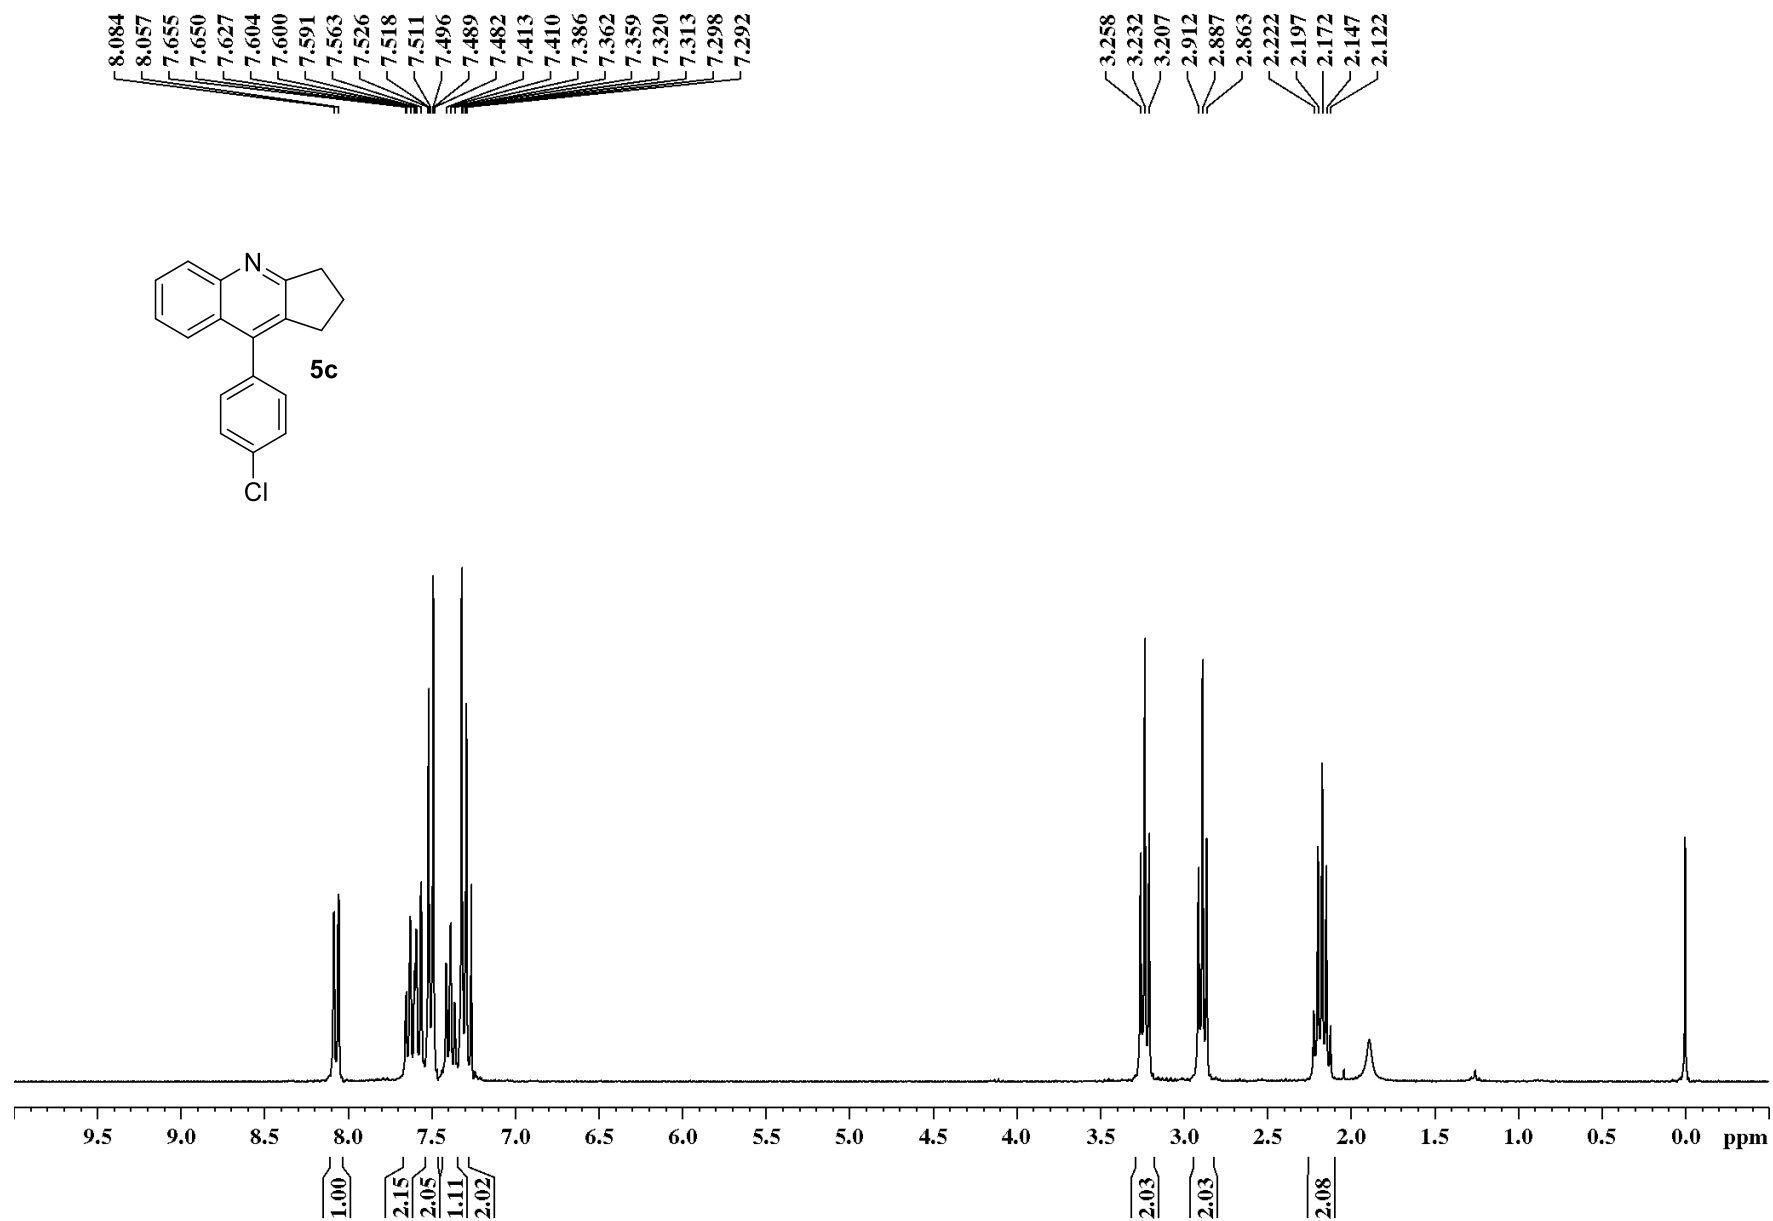

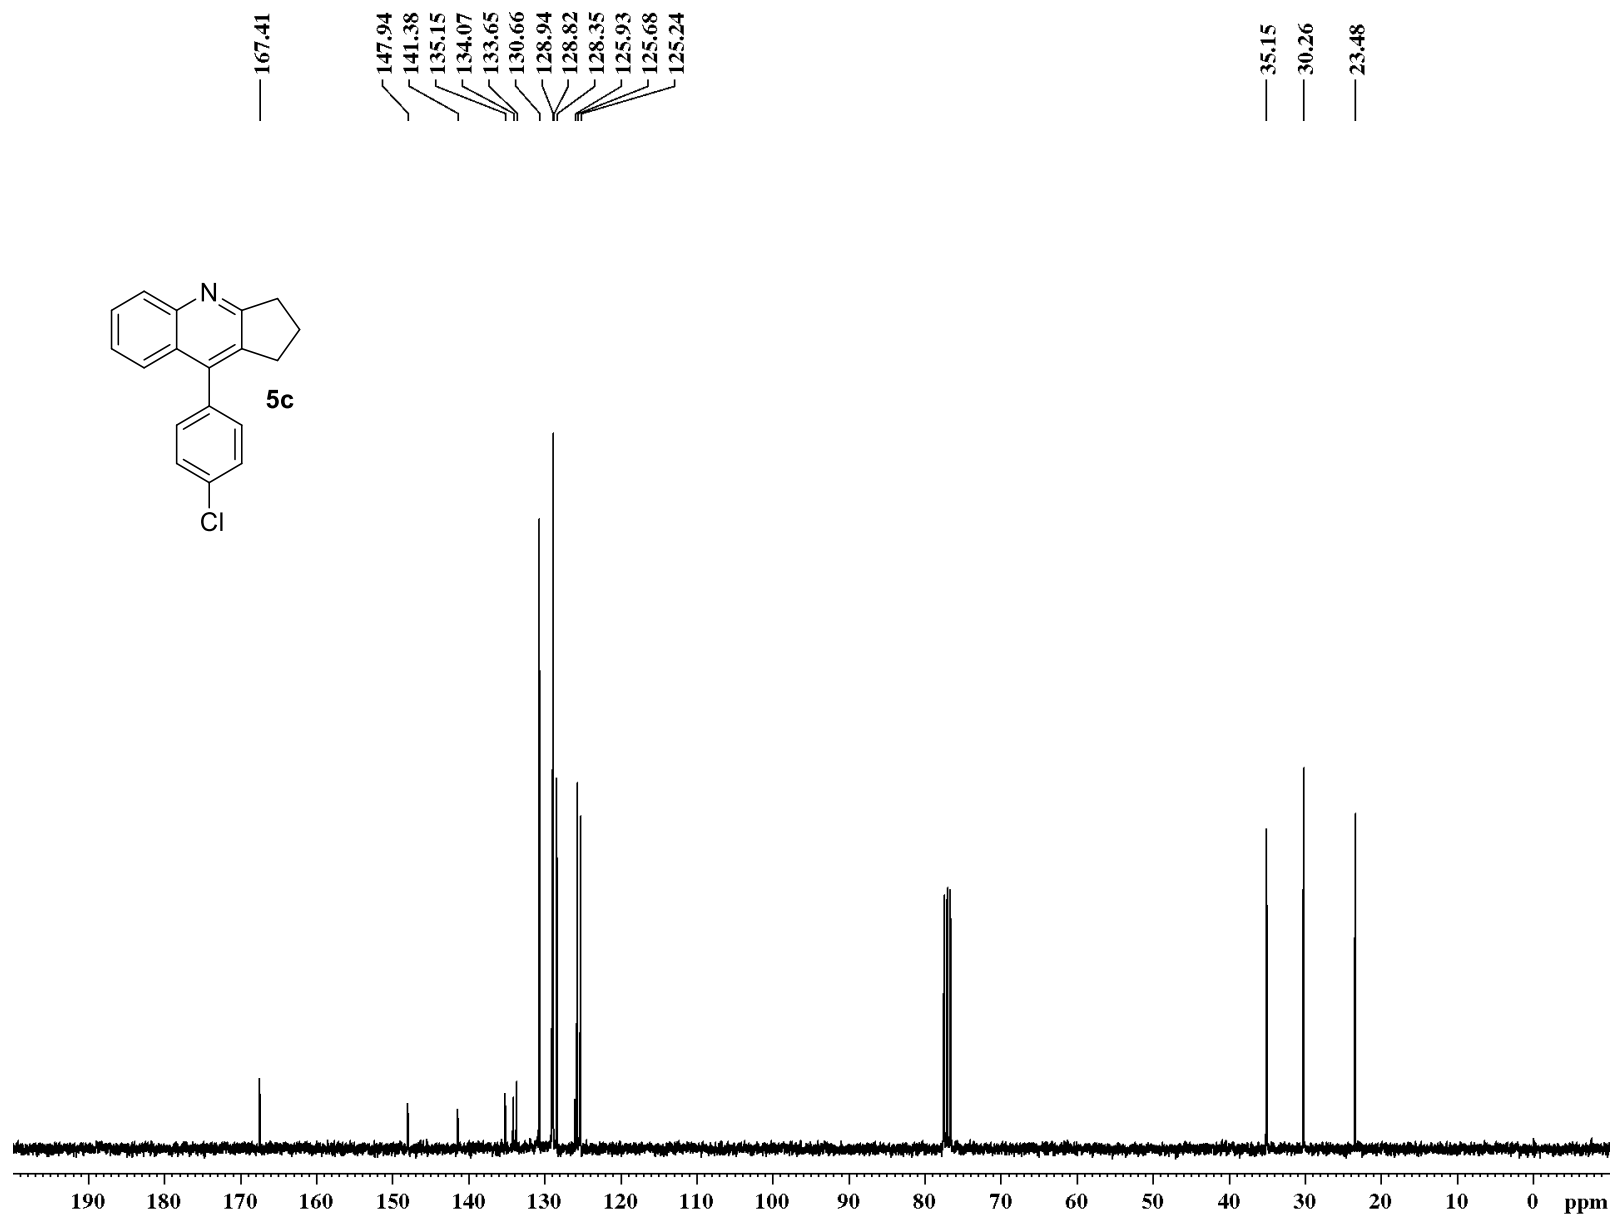

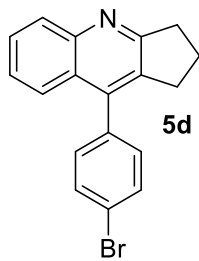

8.082  
8.055  
7.664  
7.637  
7.621  
7.585  
7.557  
7.404  
7.378  
7.353  
7.265  
7.250  
7.223

3.252  
3.226  
3.201  
2.903  
2.878  
2.853  
2.214  
2.189  
2.164  
2.139  
2.114

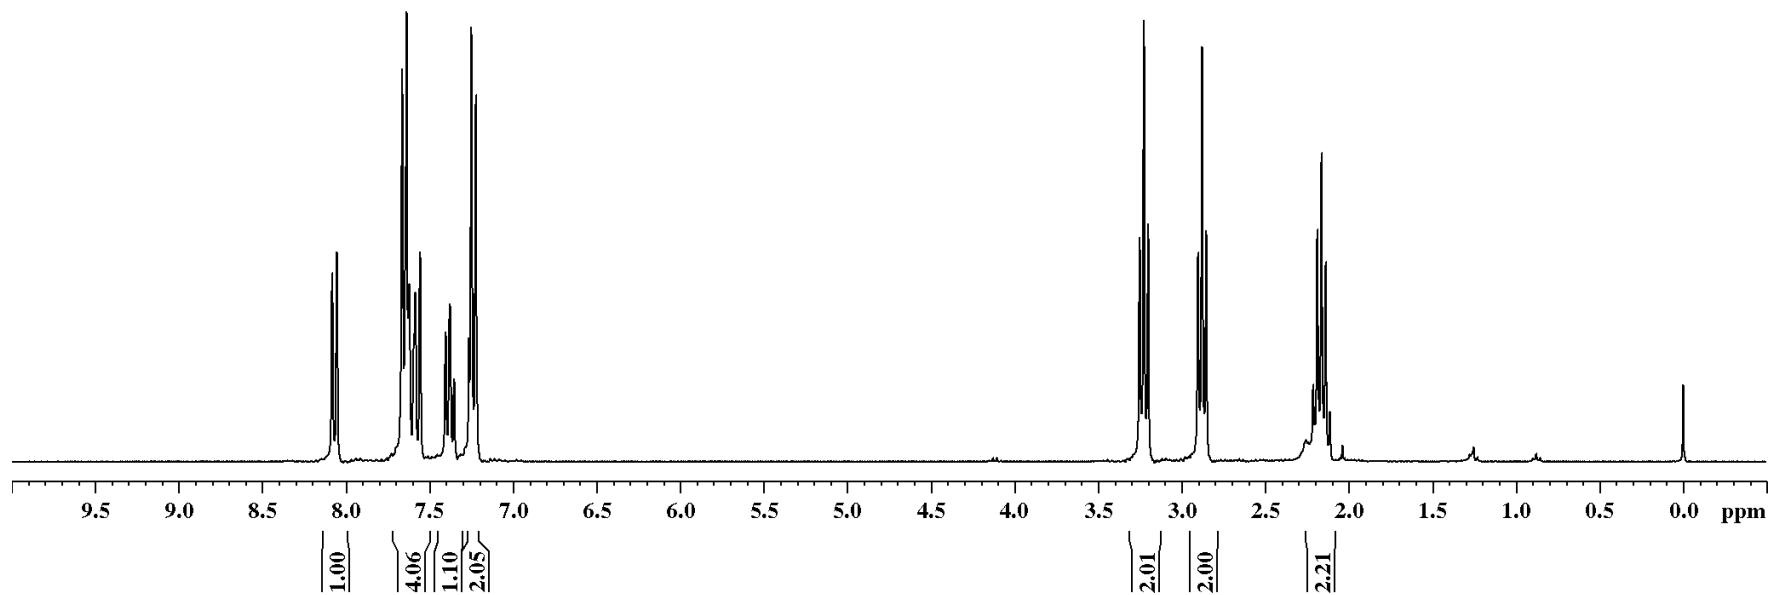

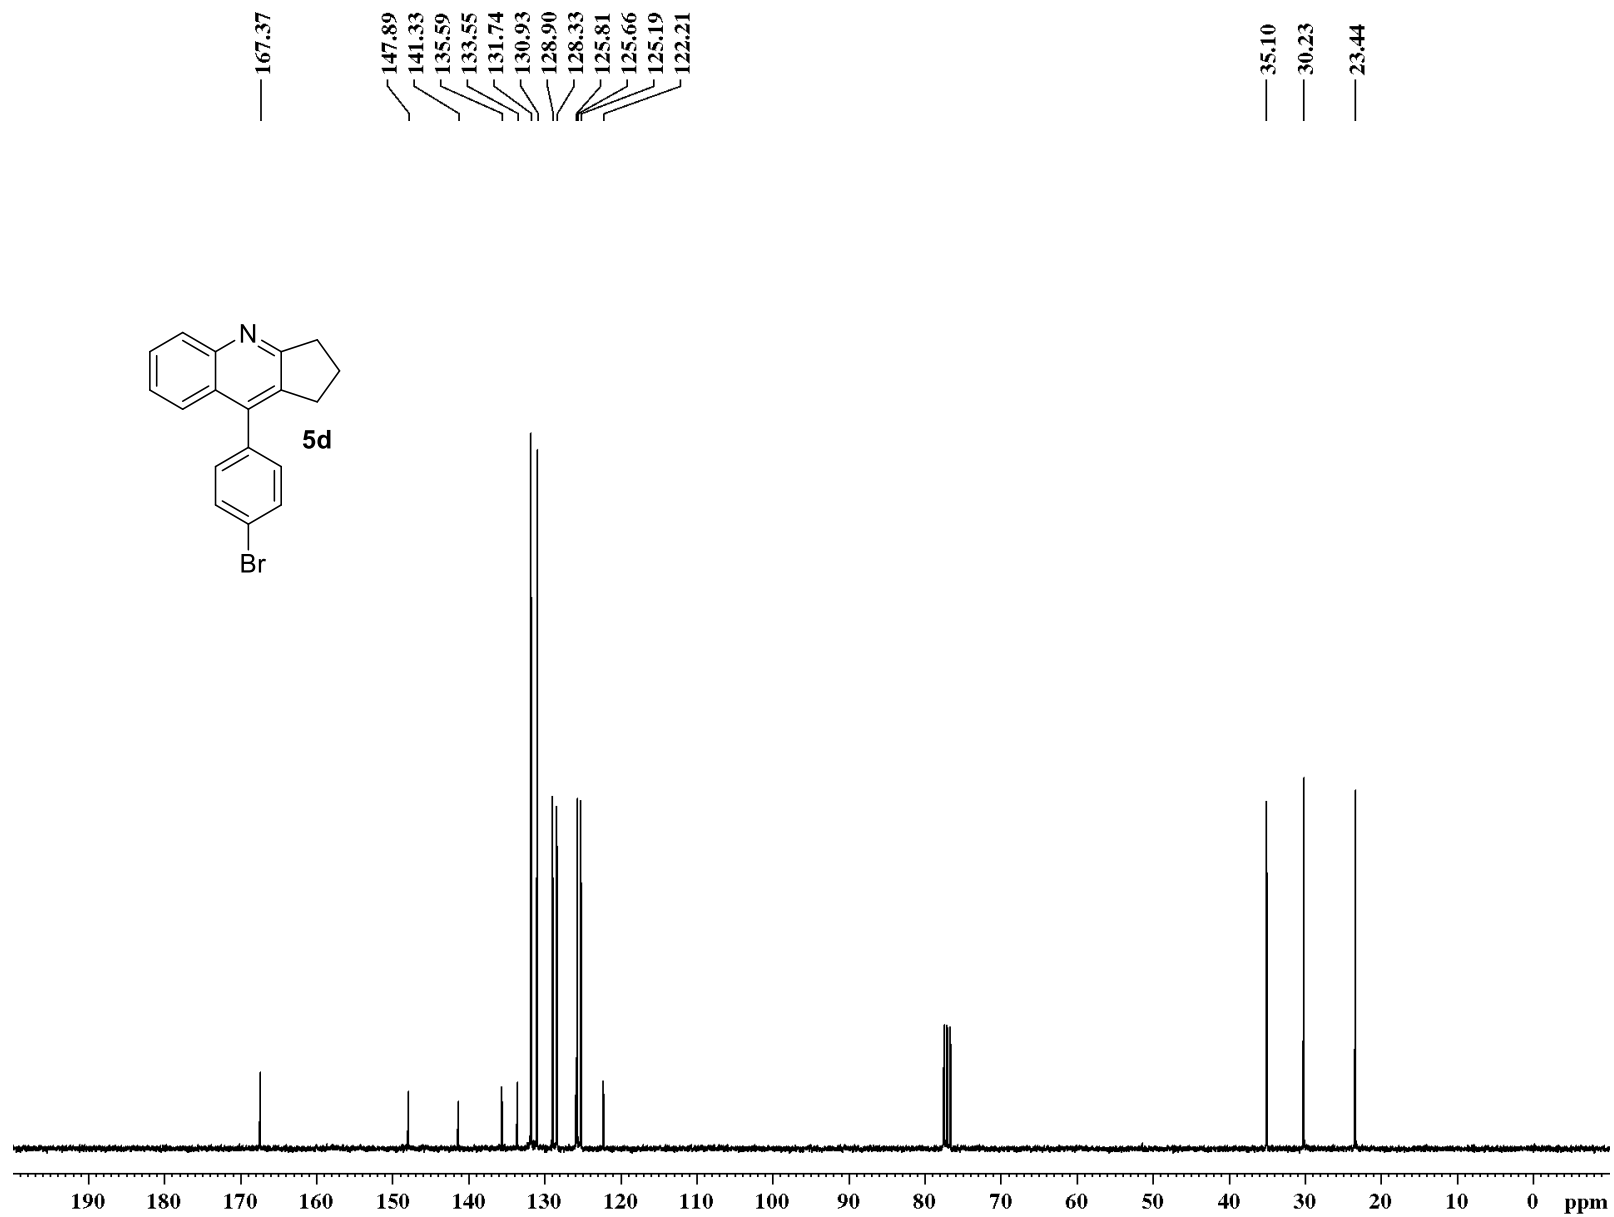

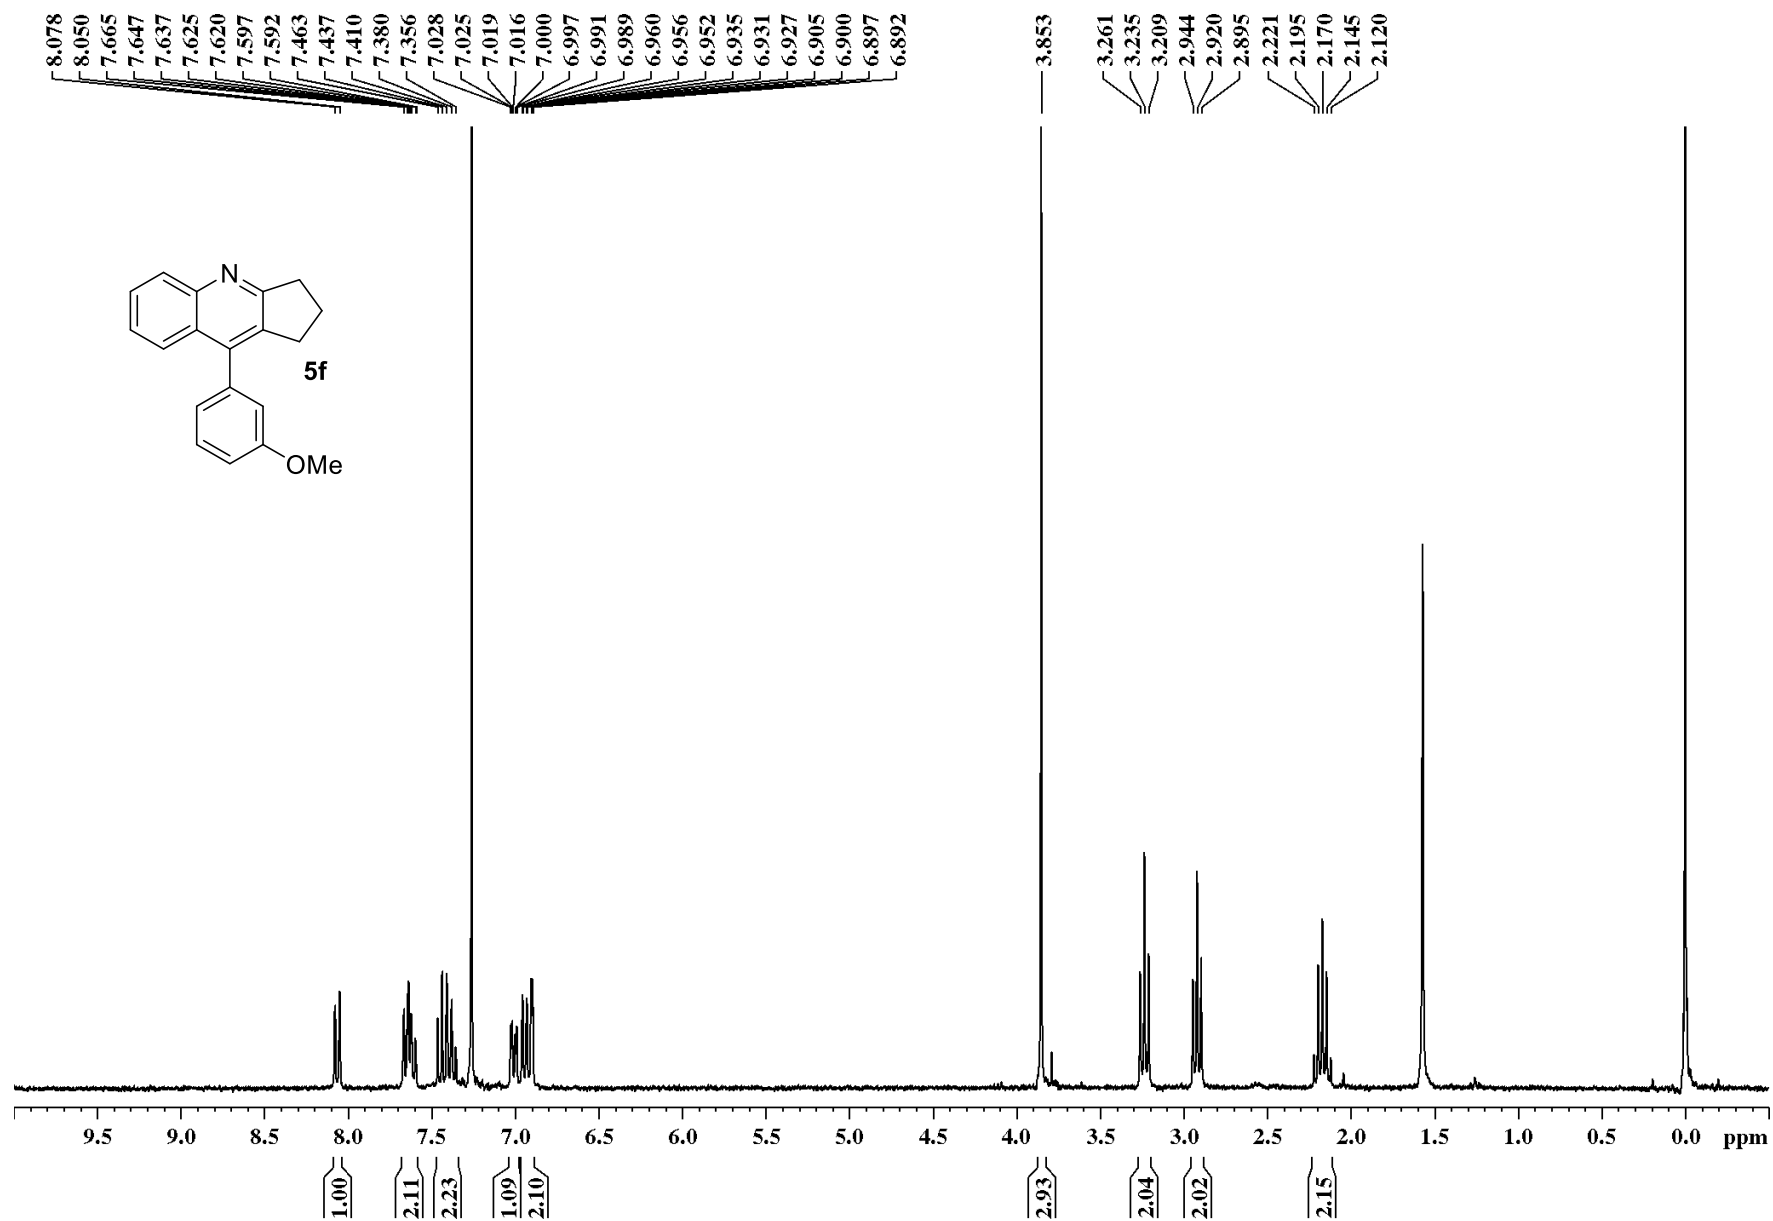



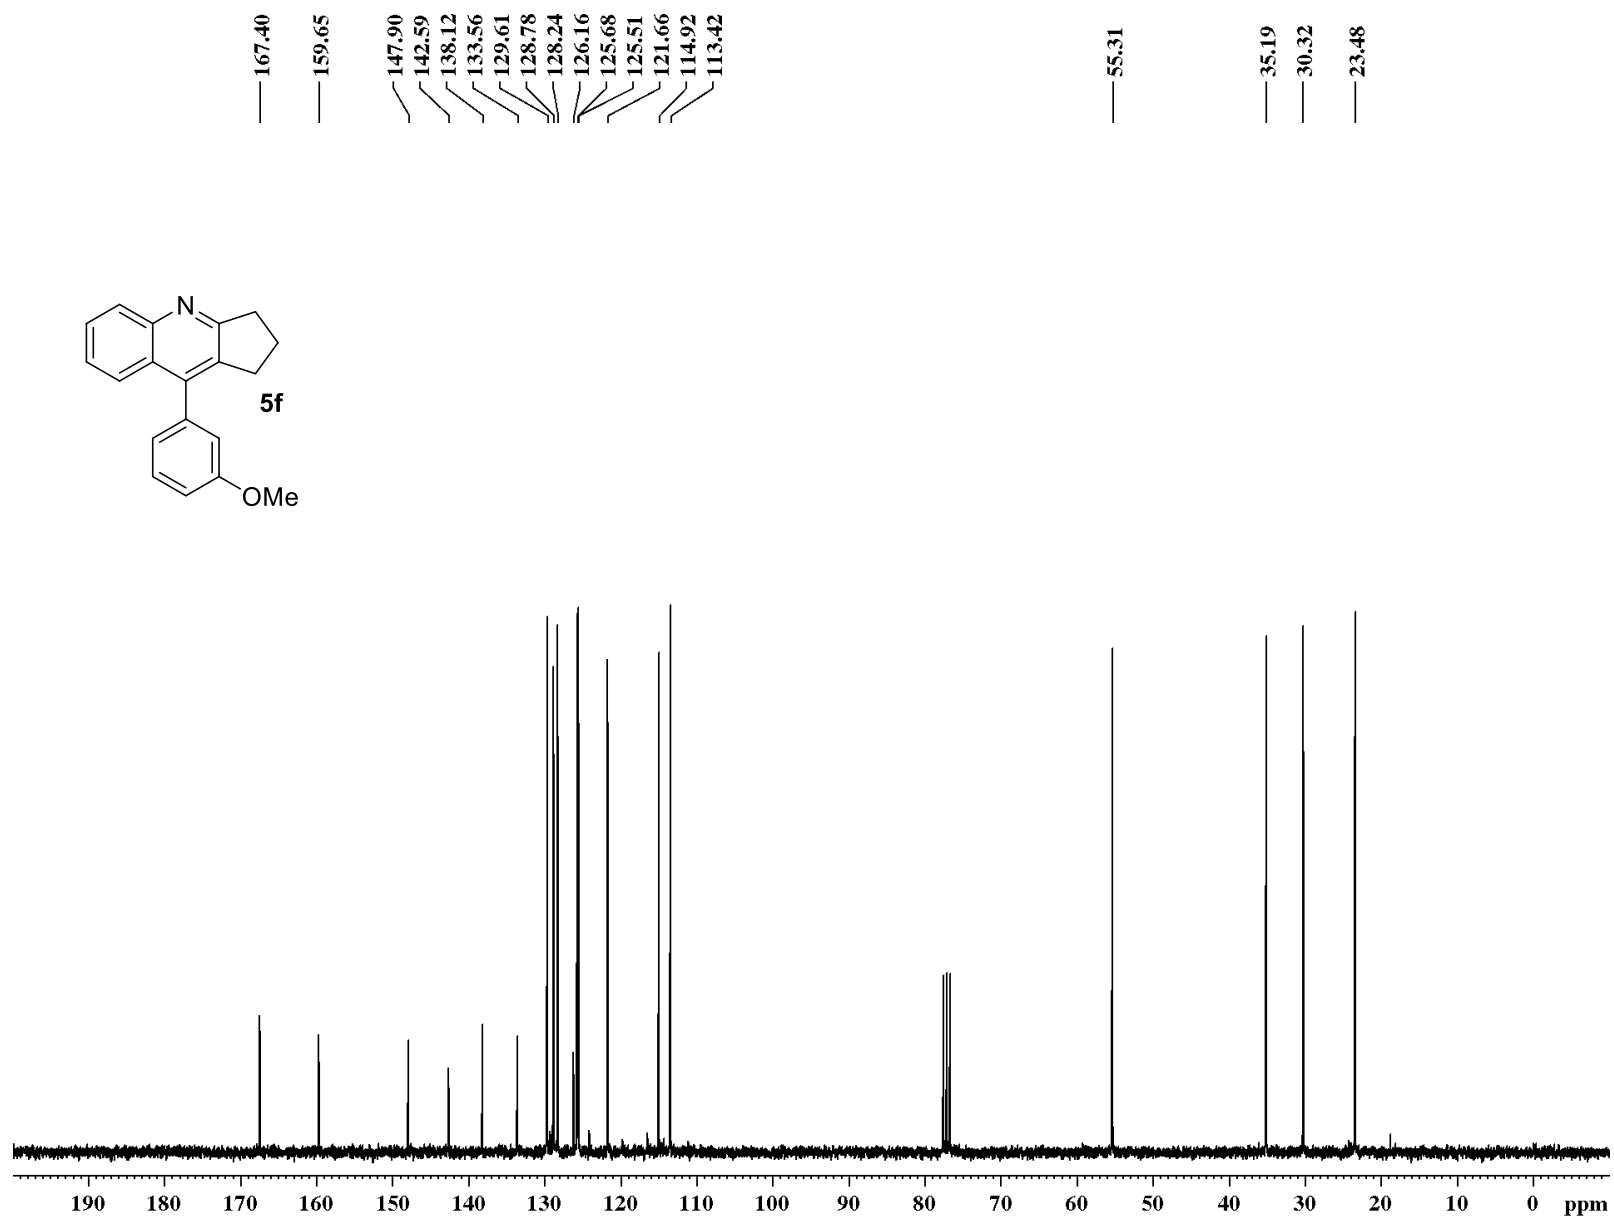

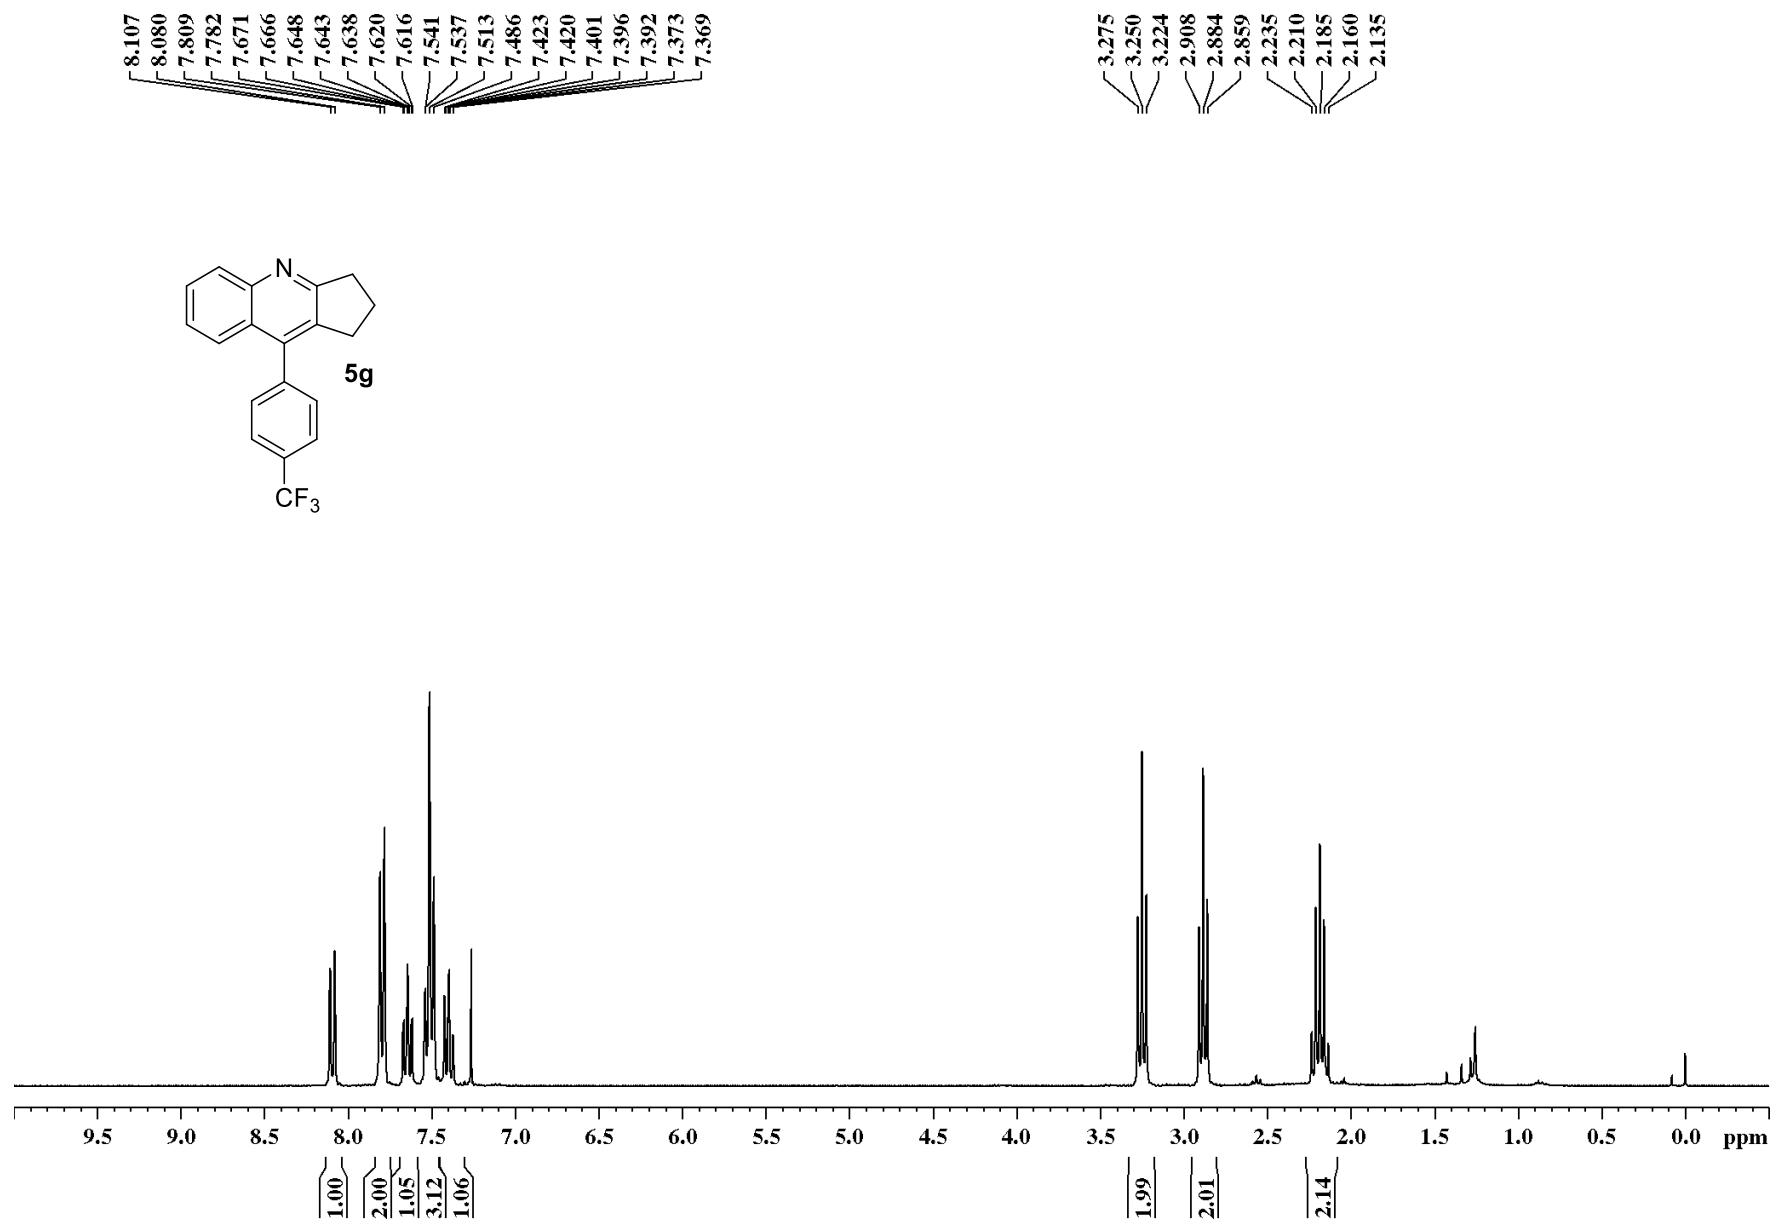

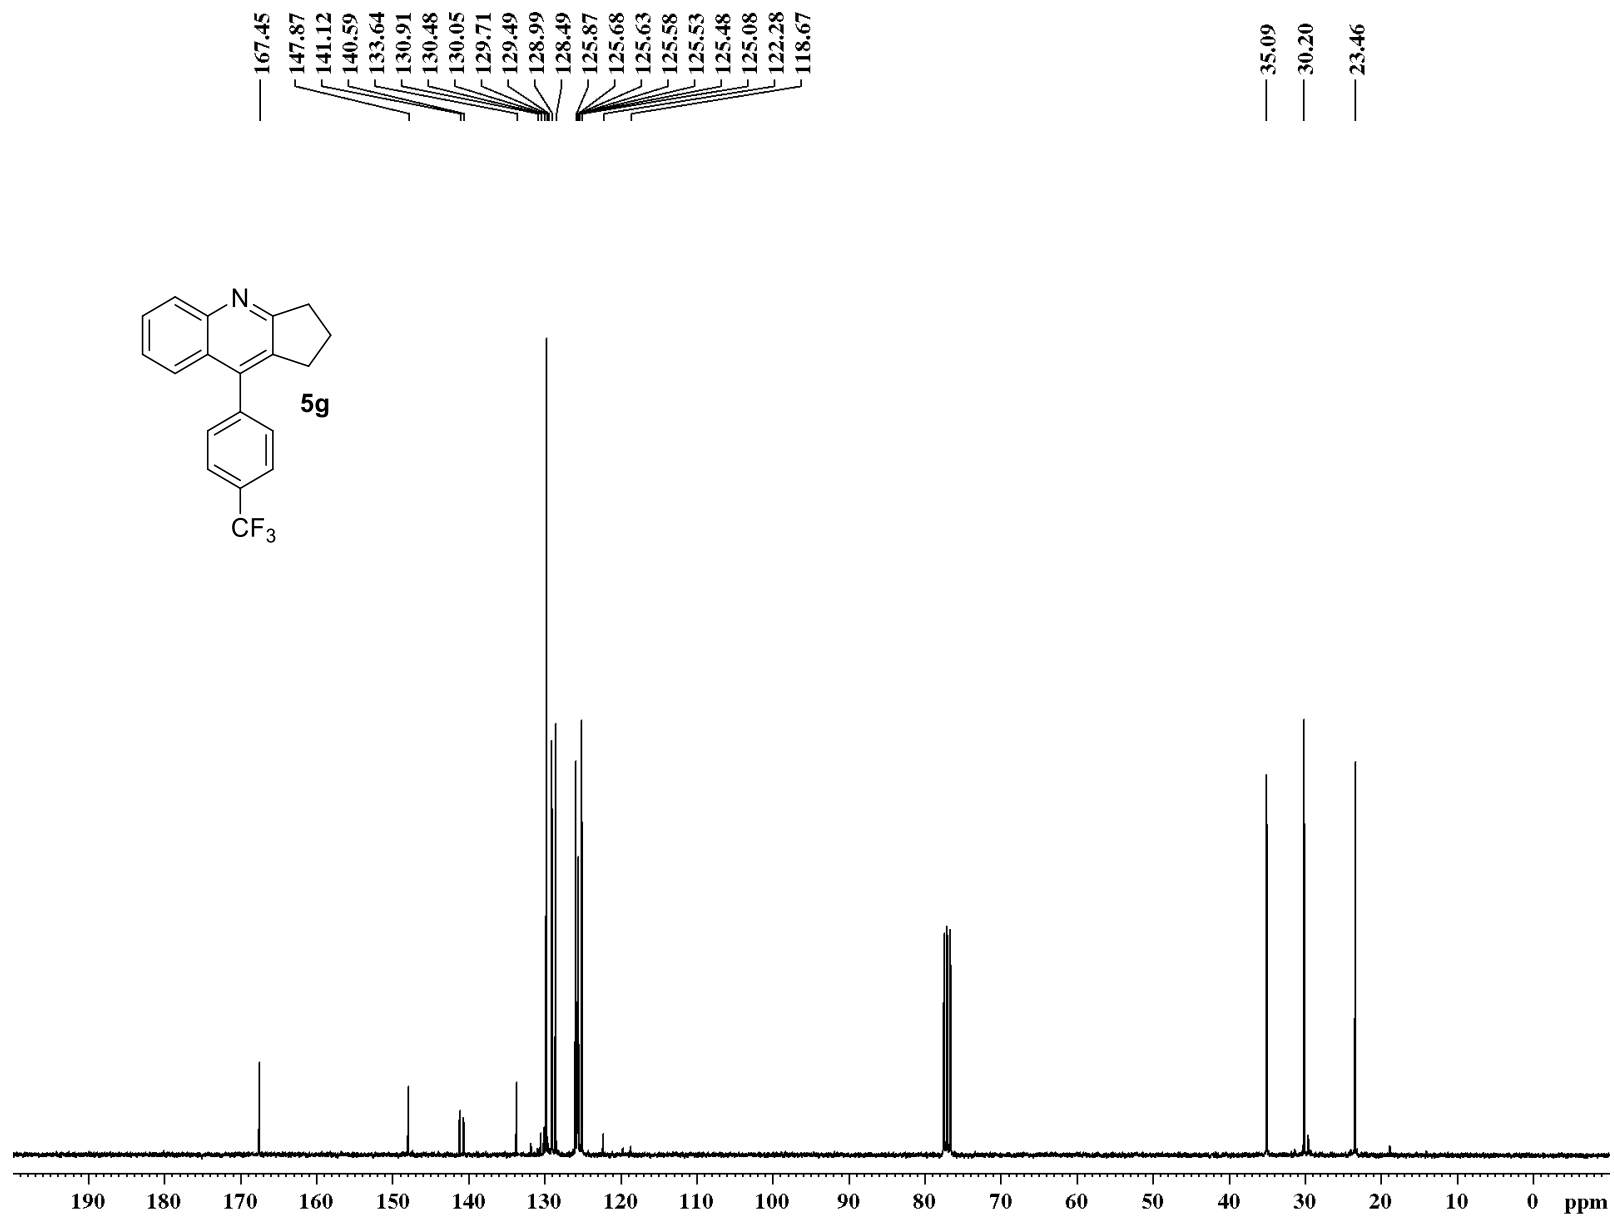

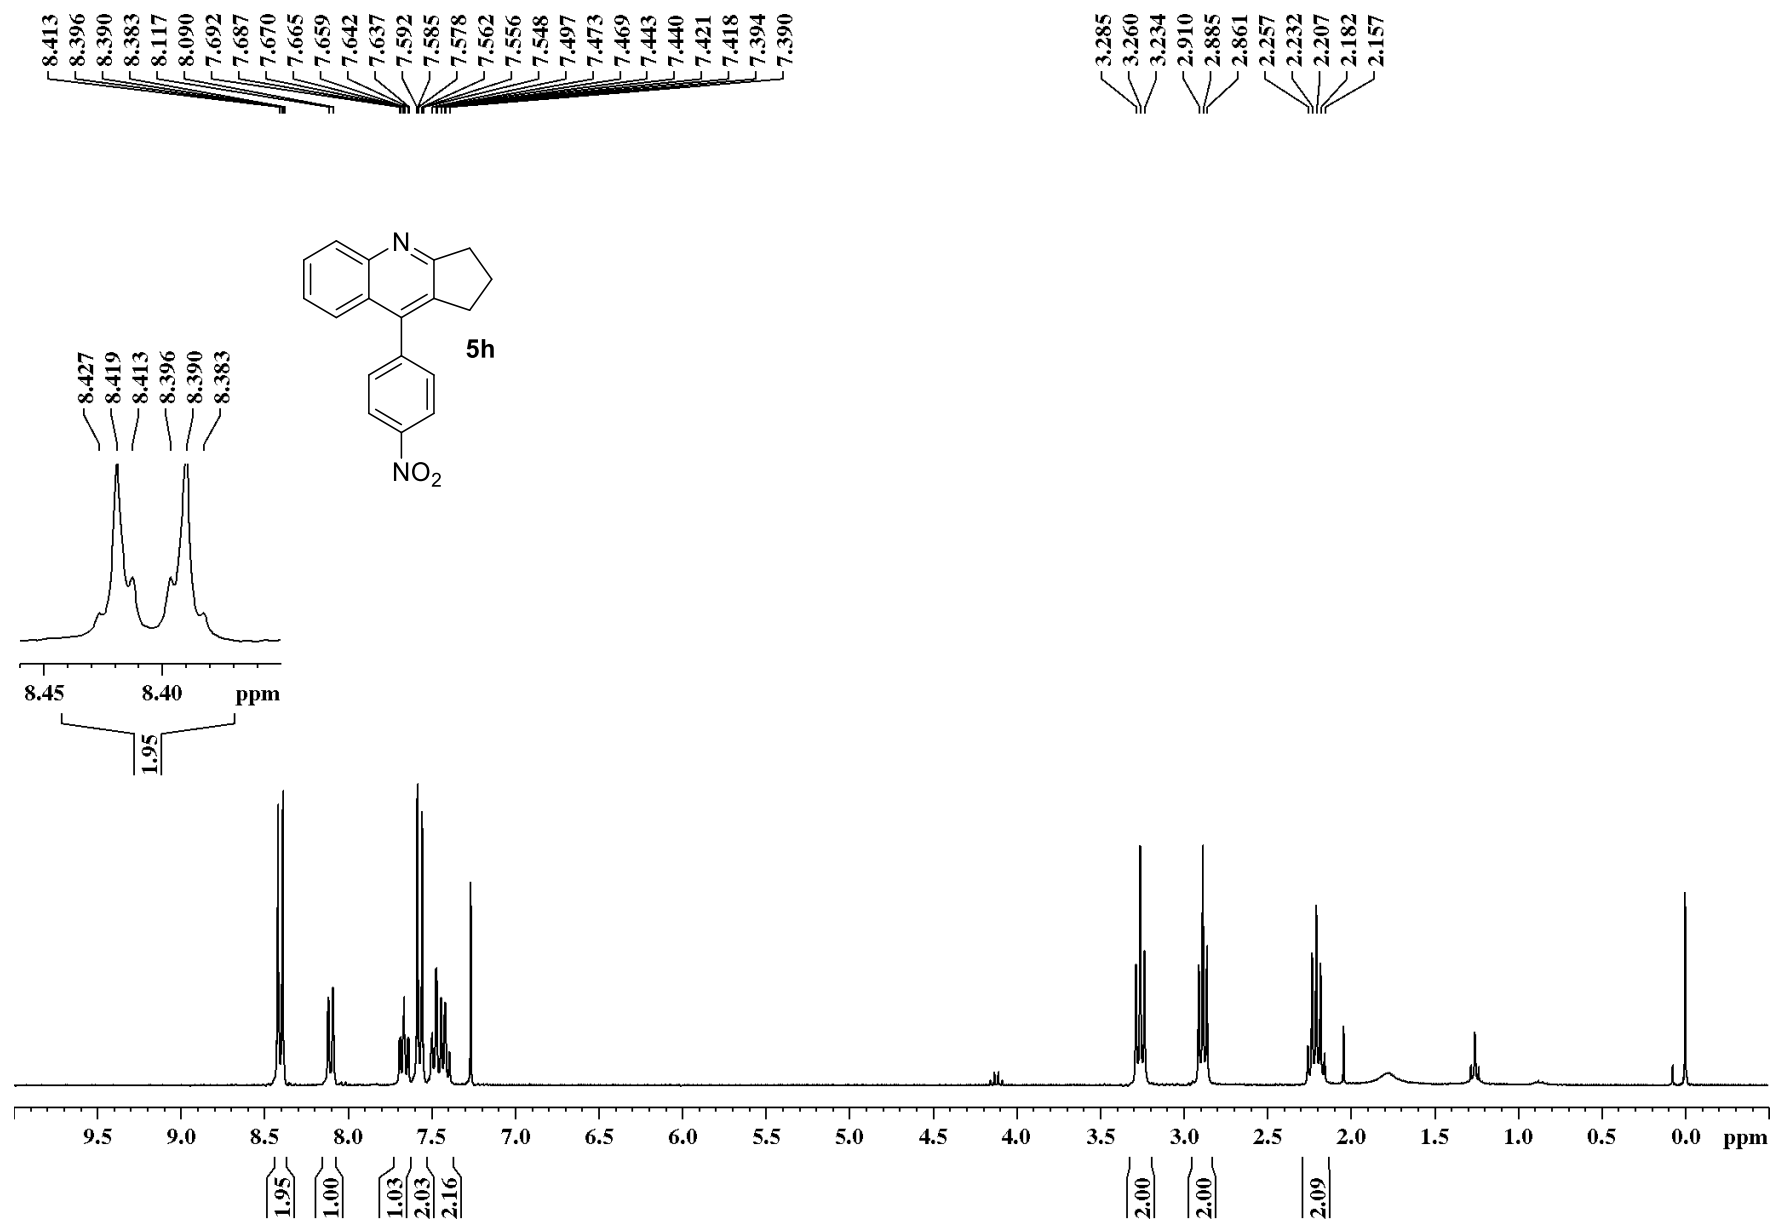

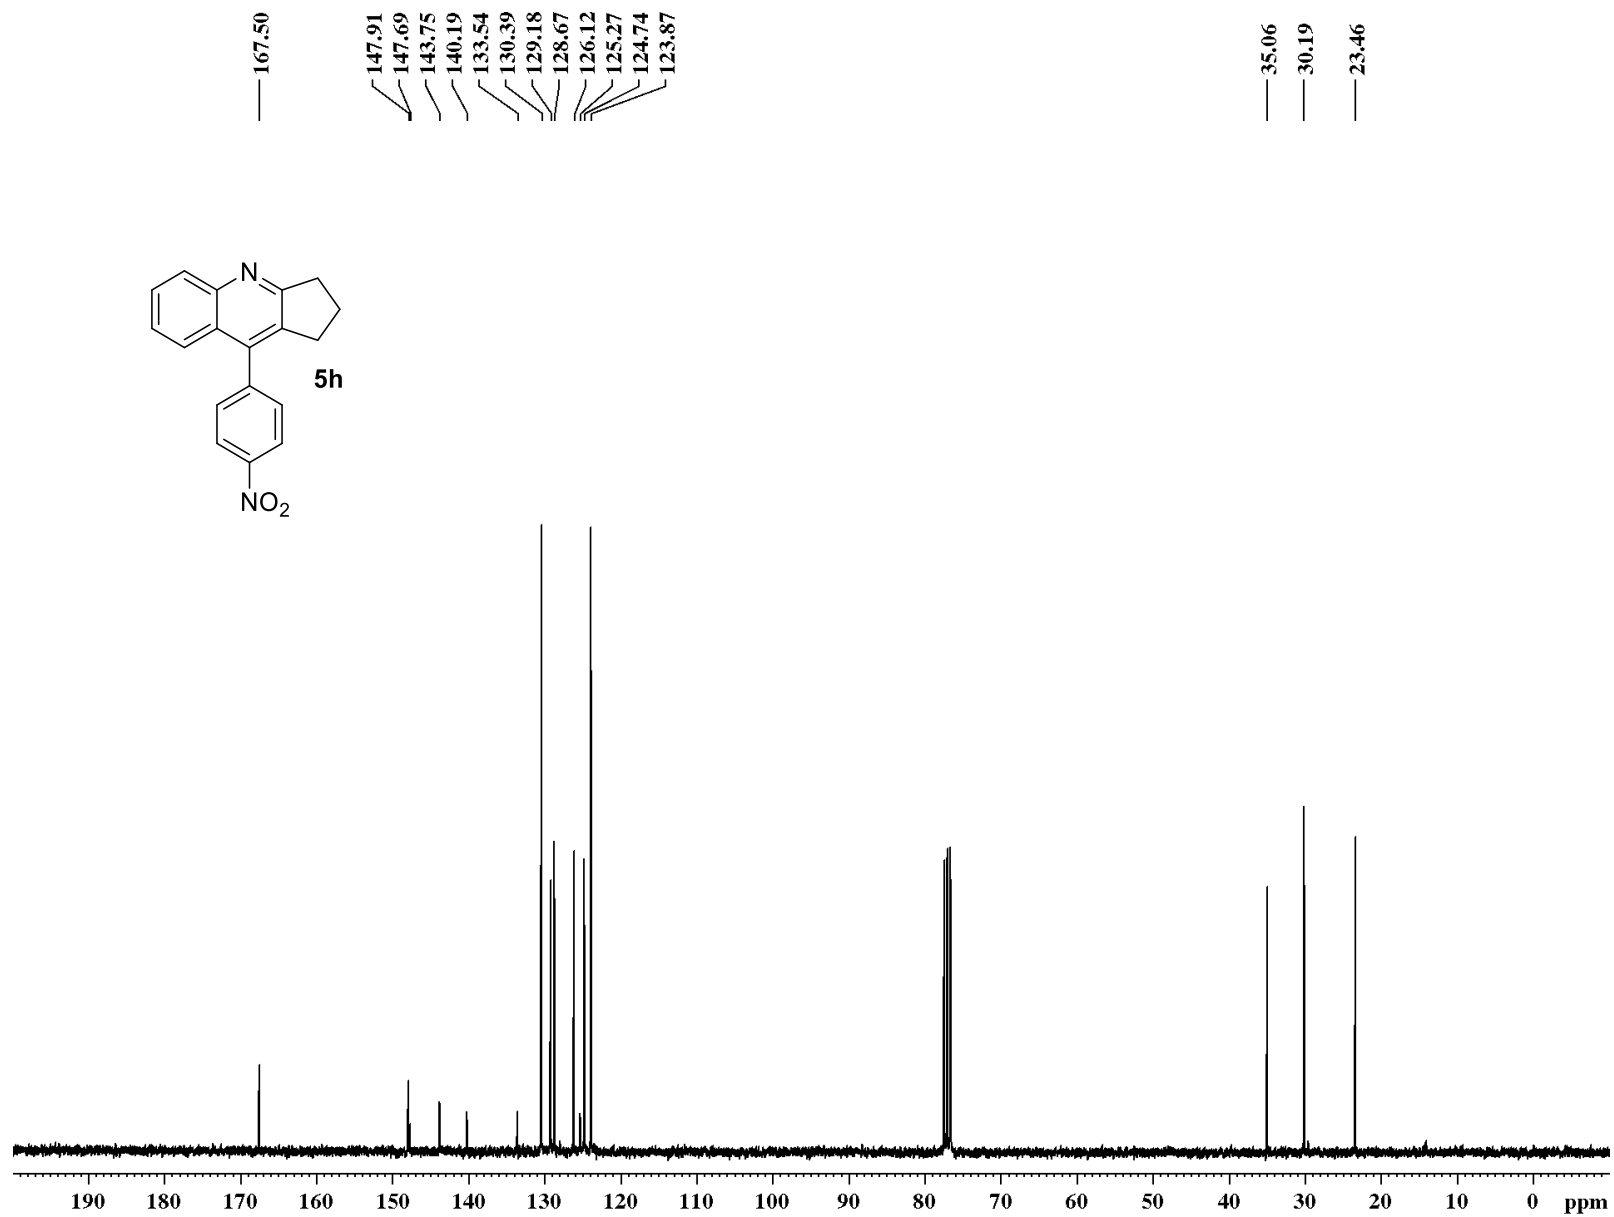

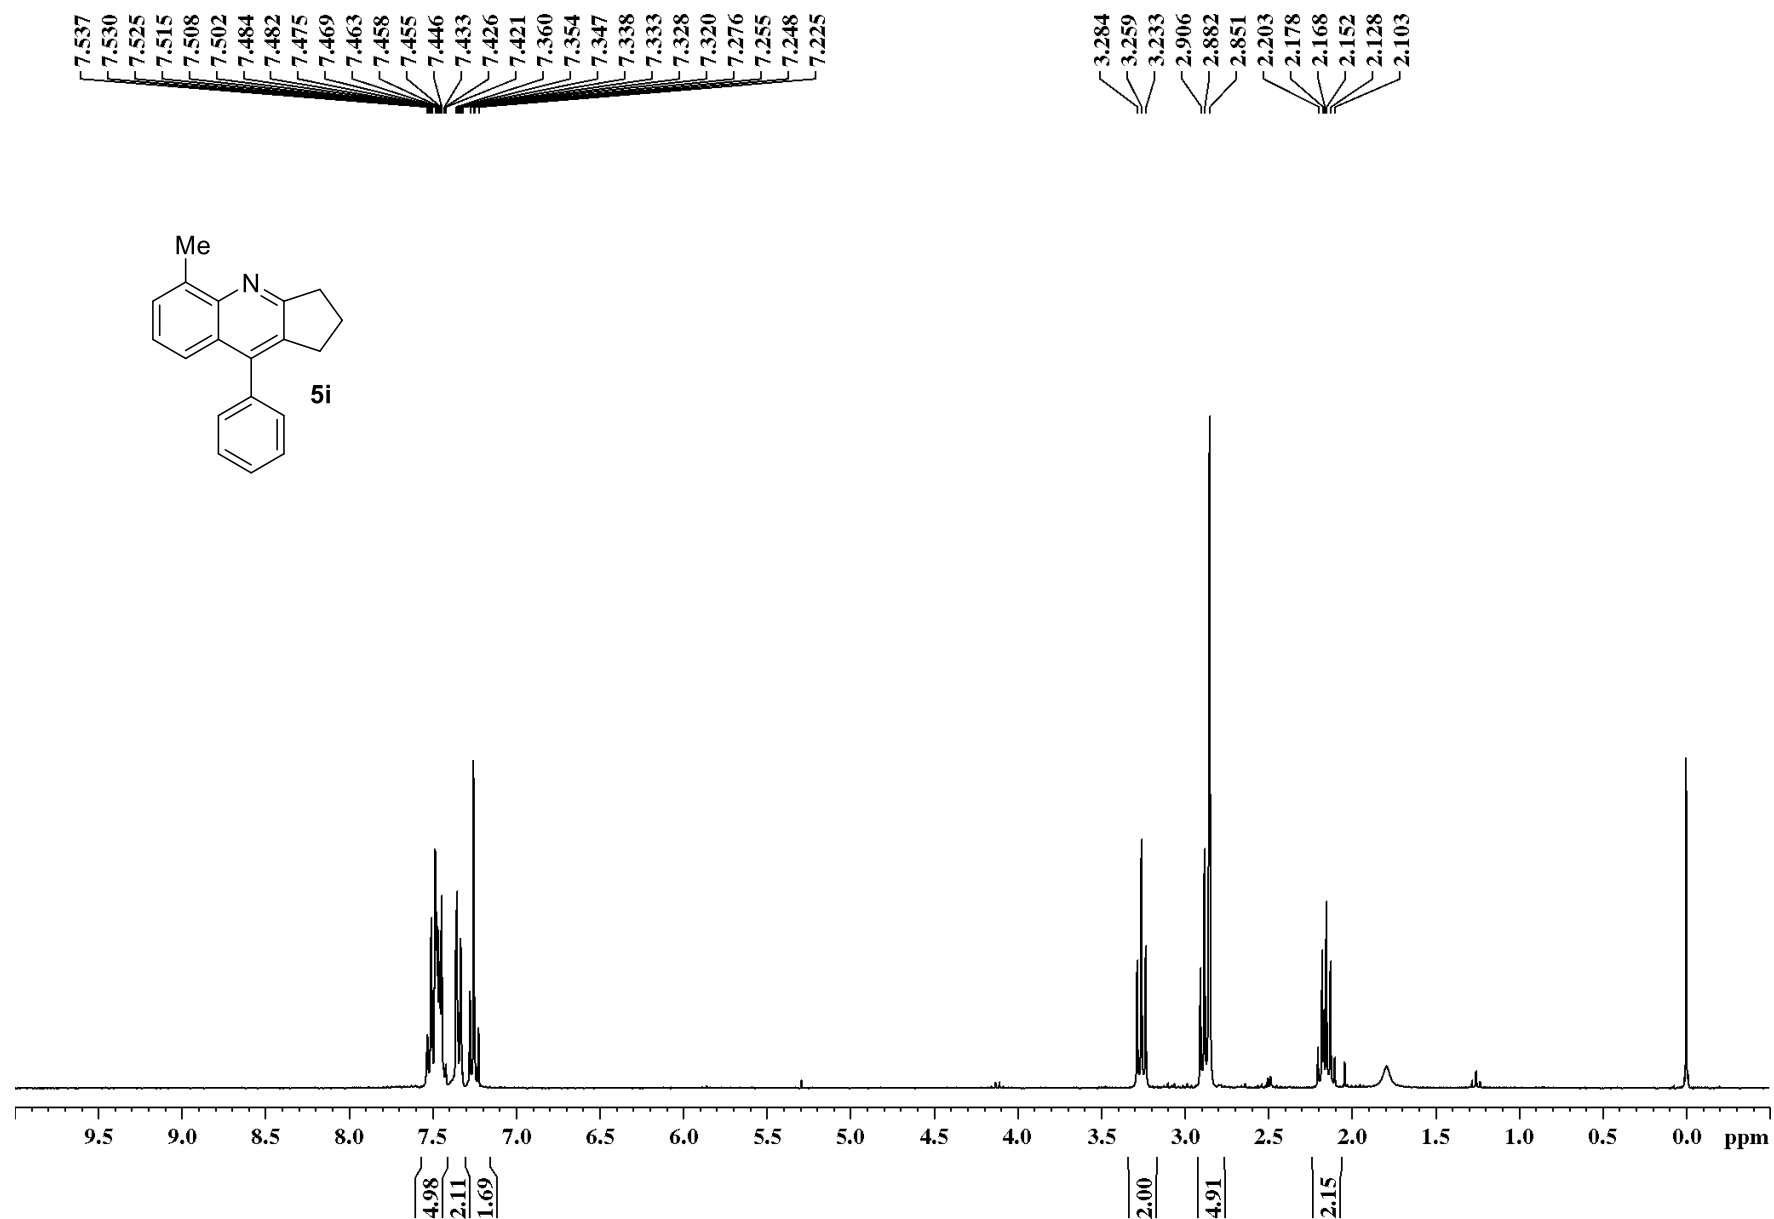

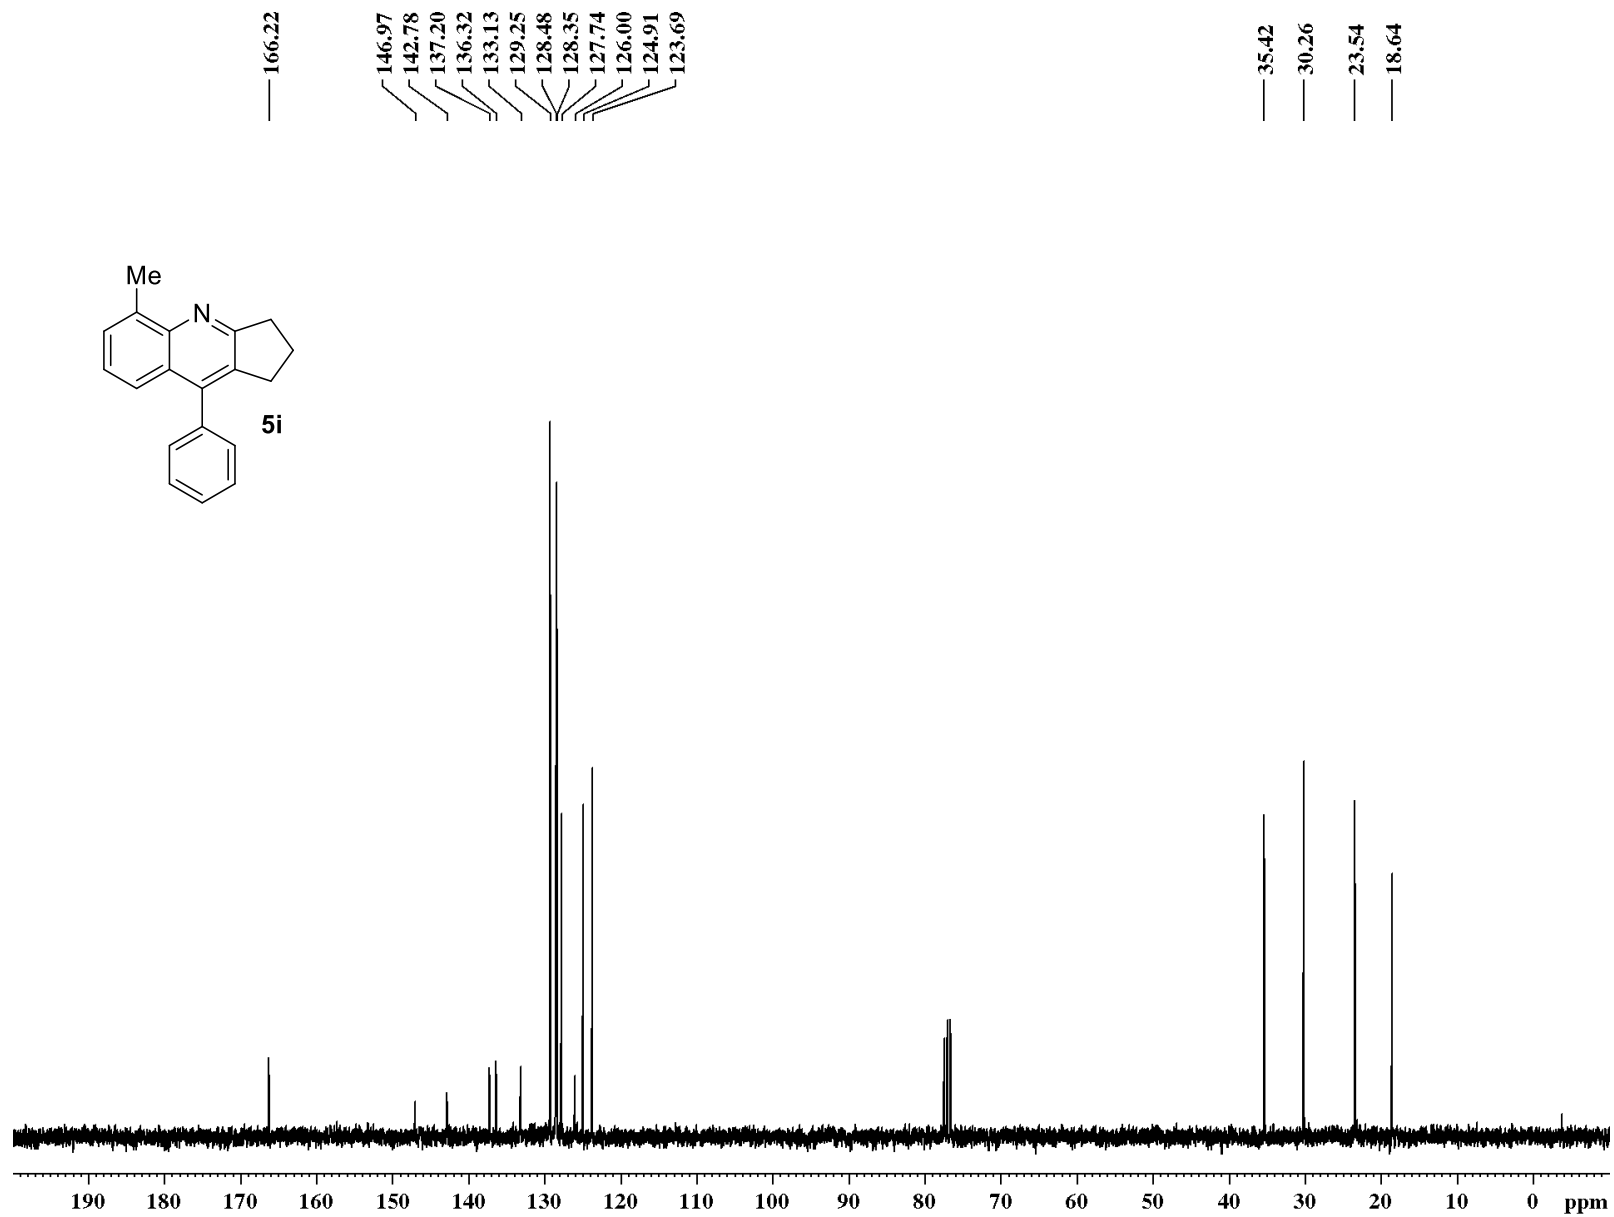

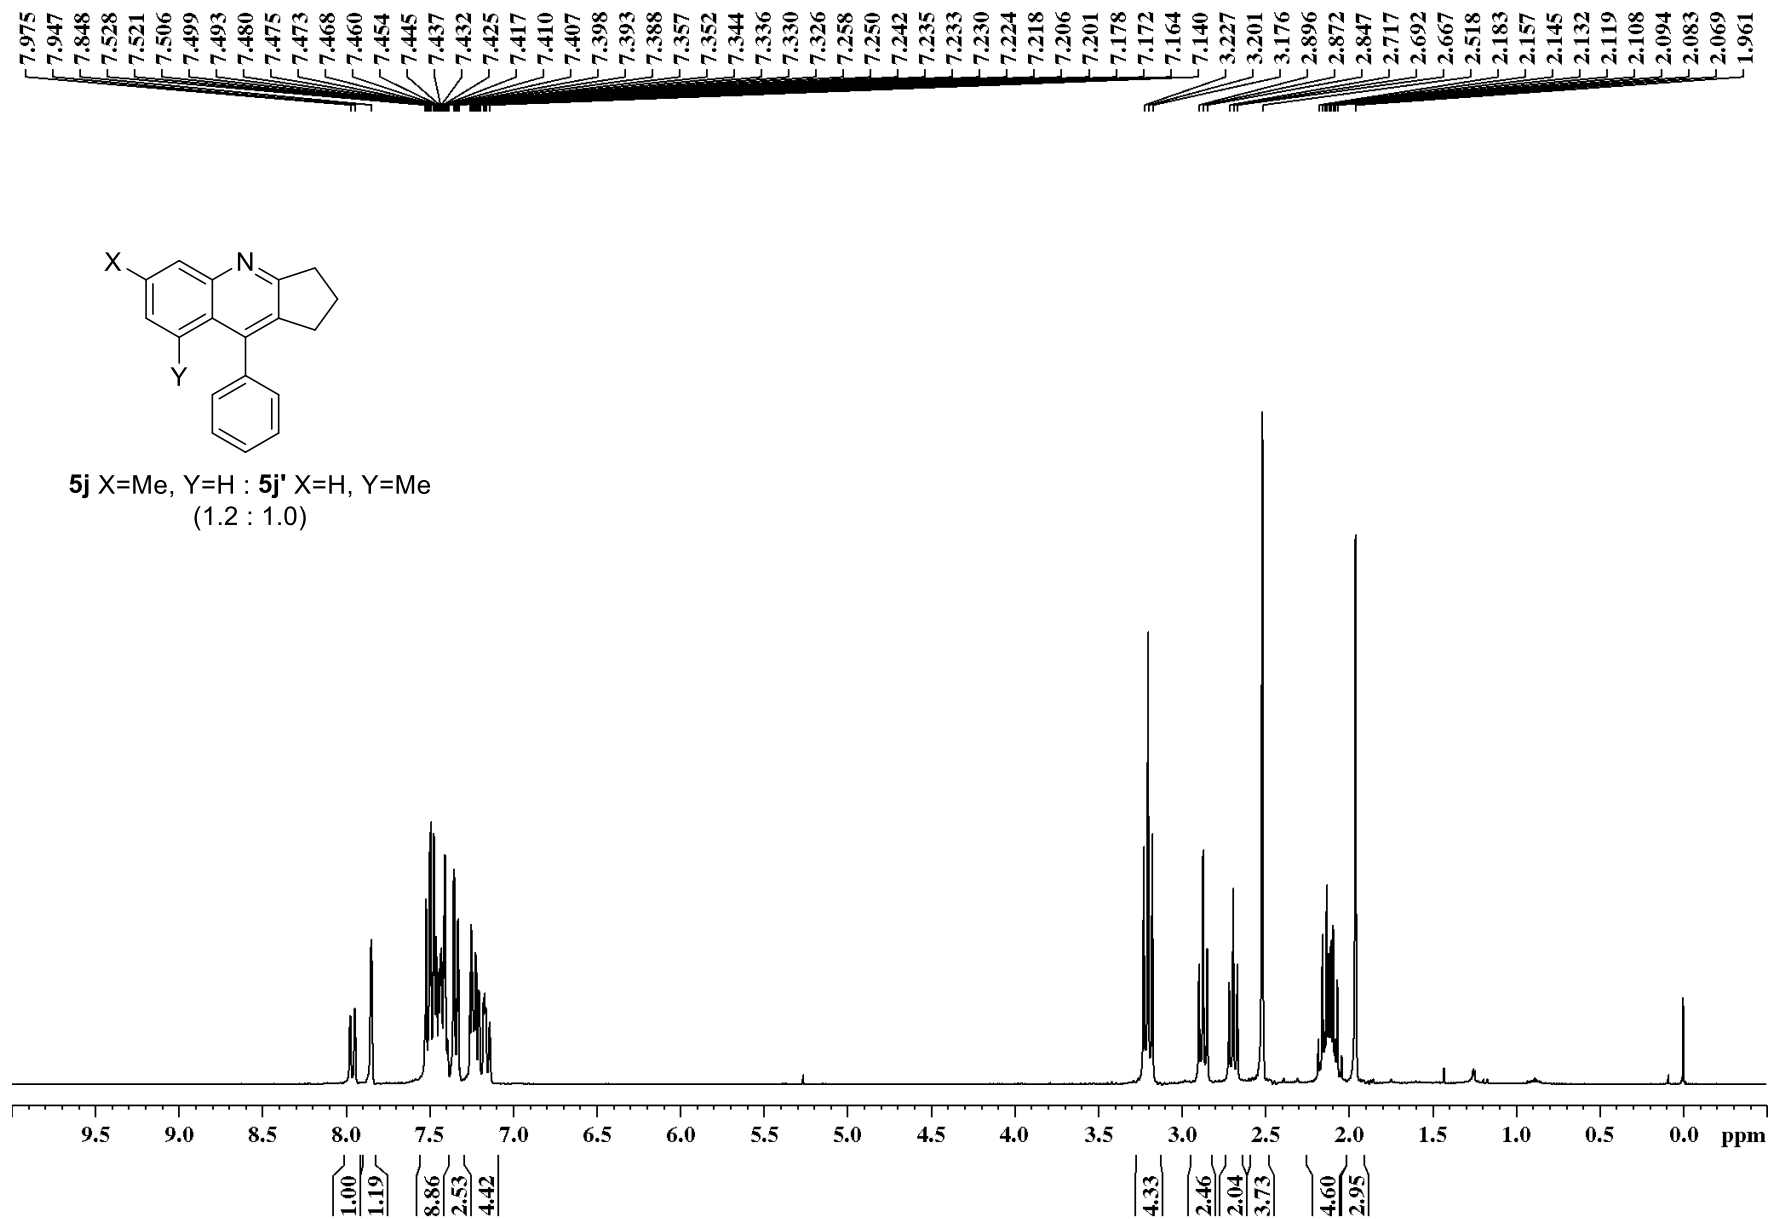



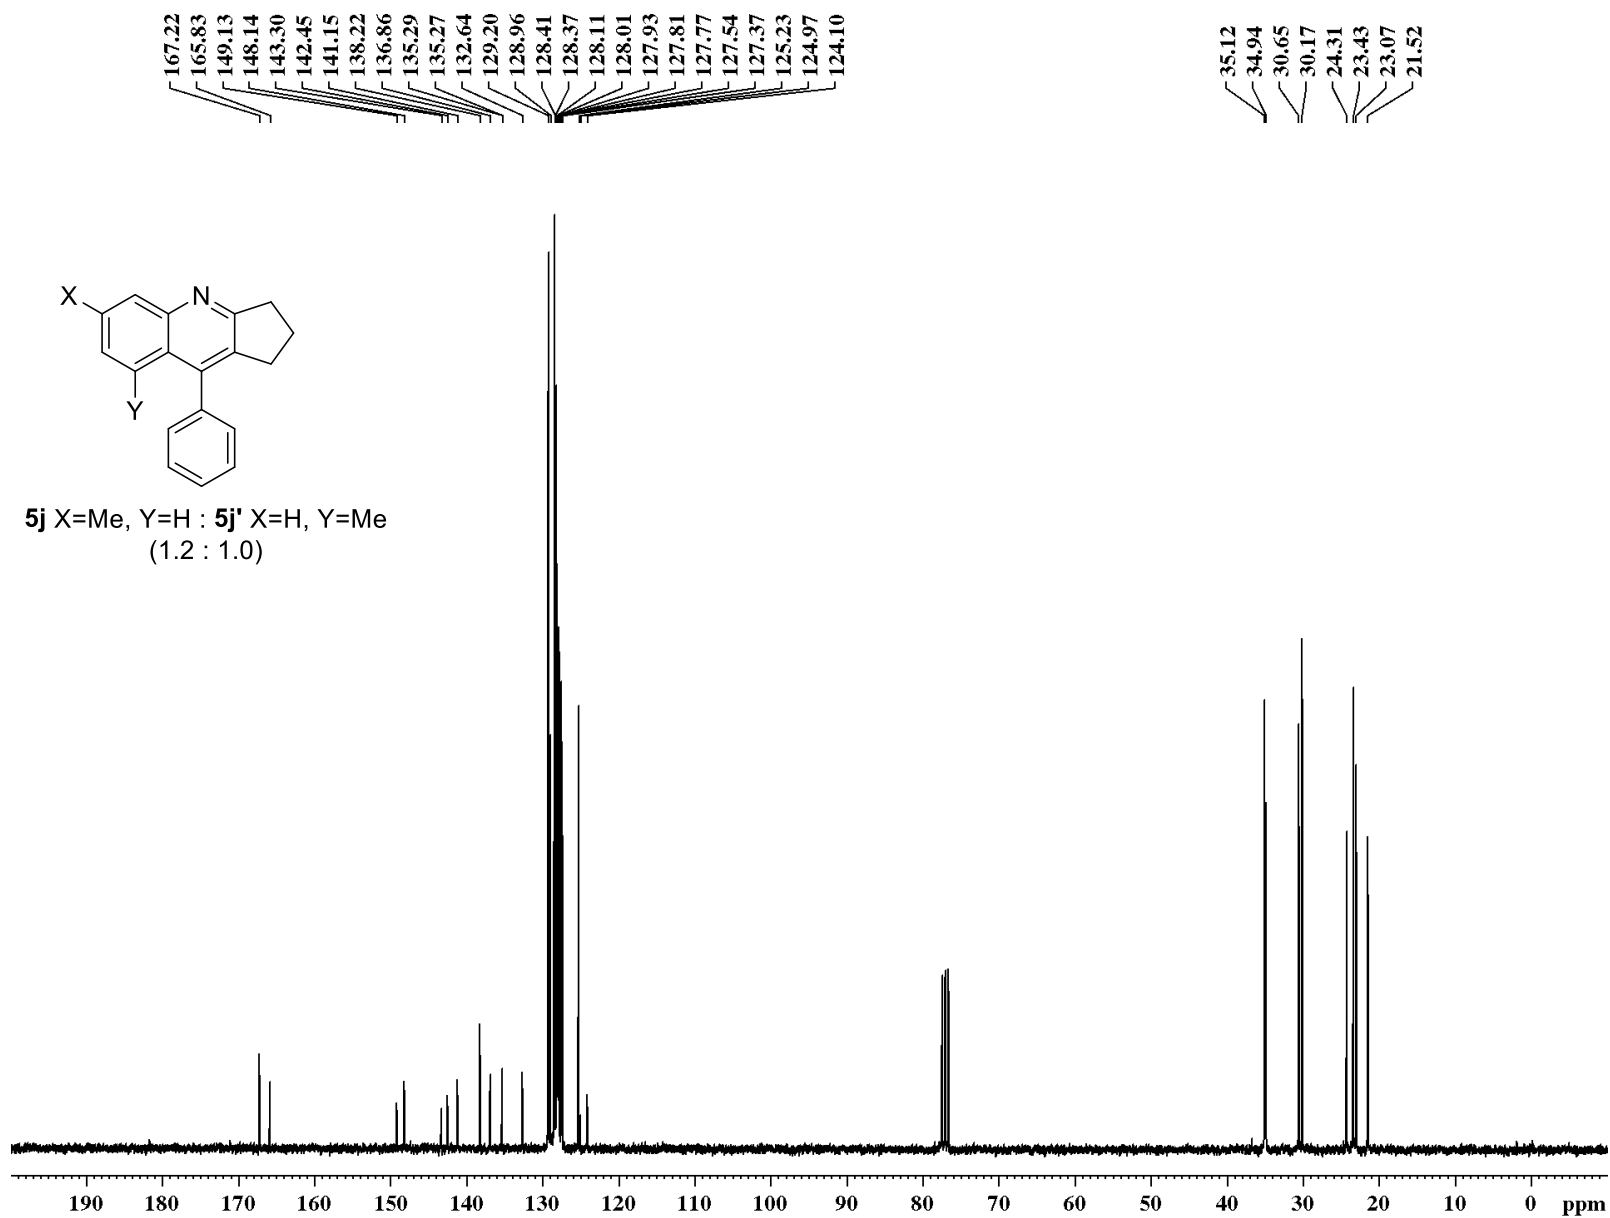

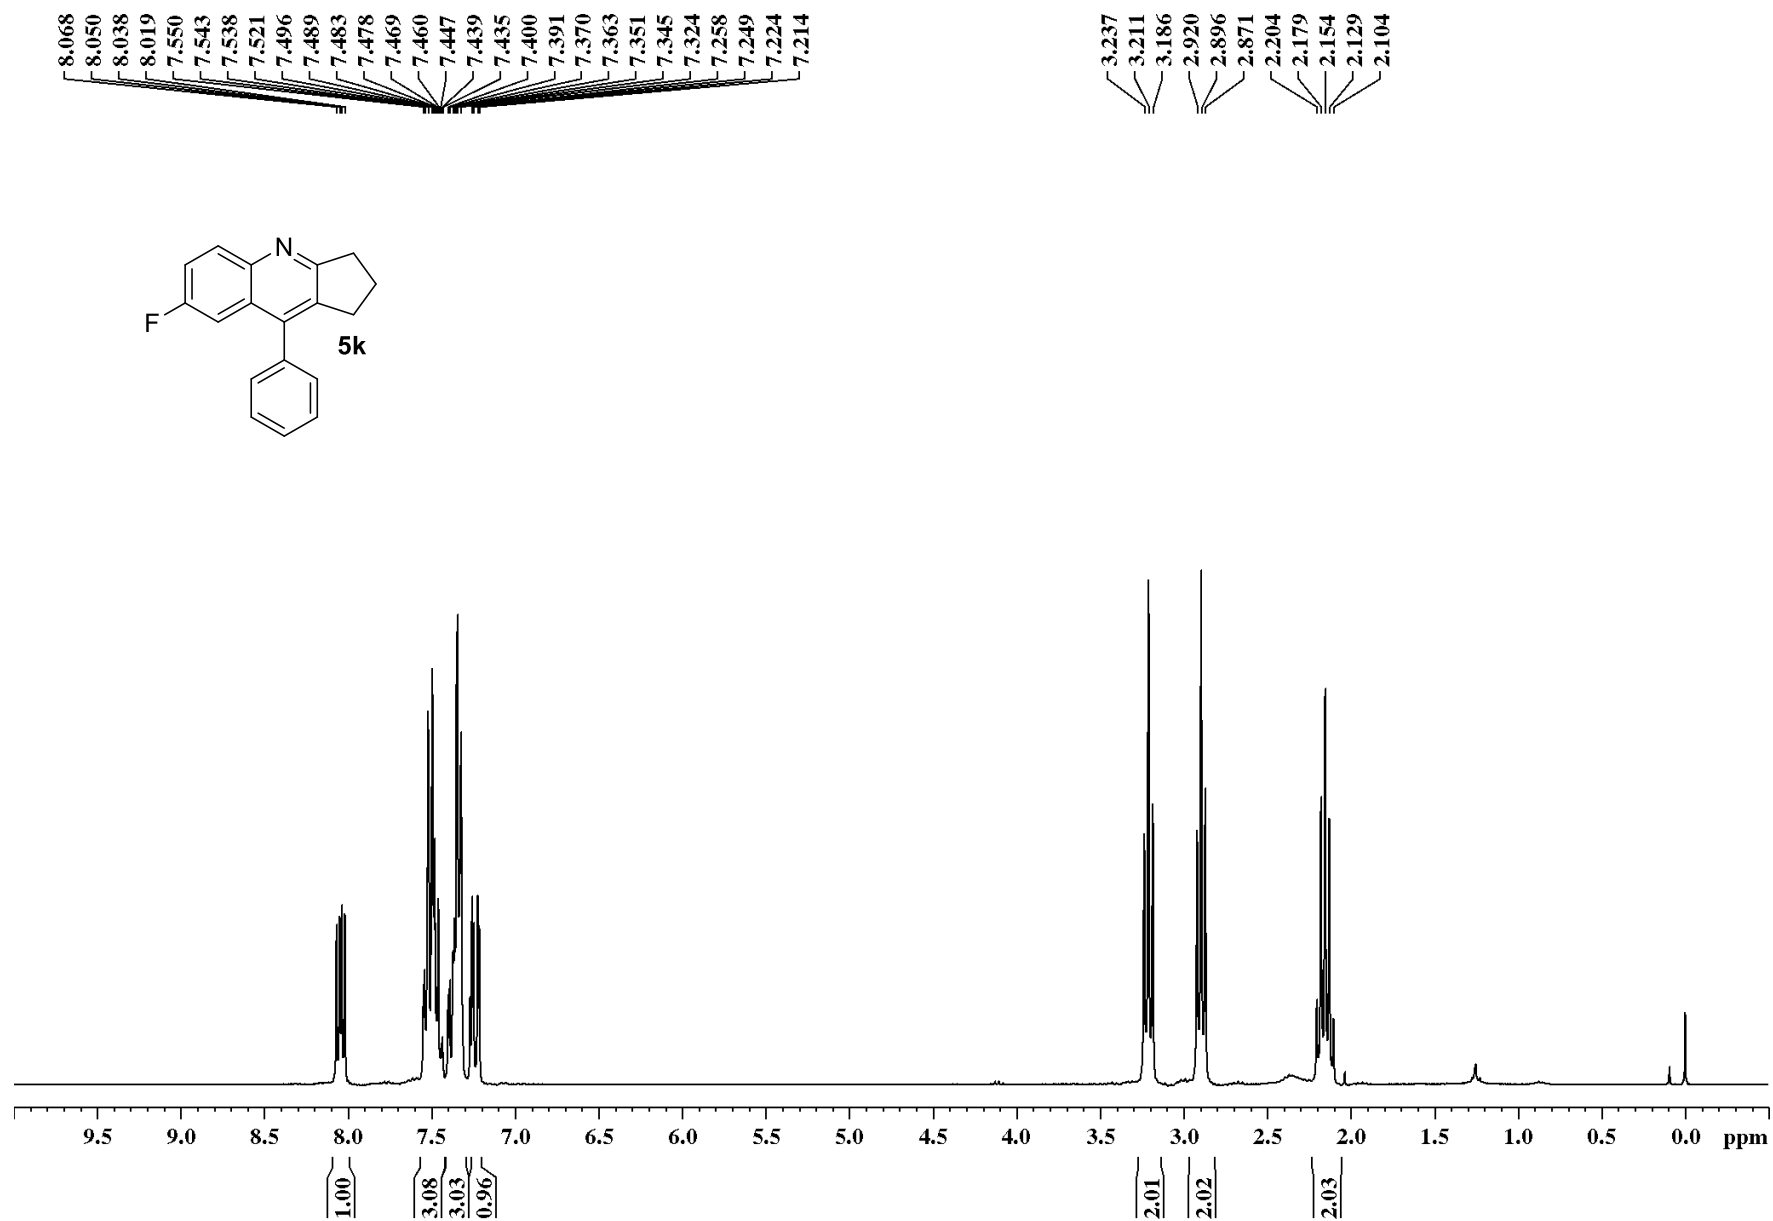

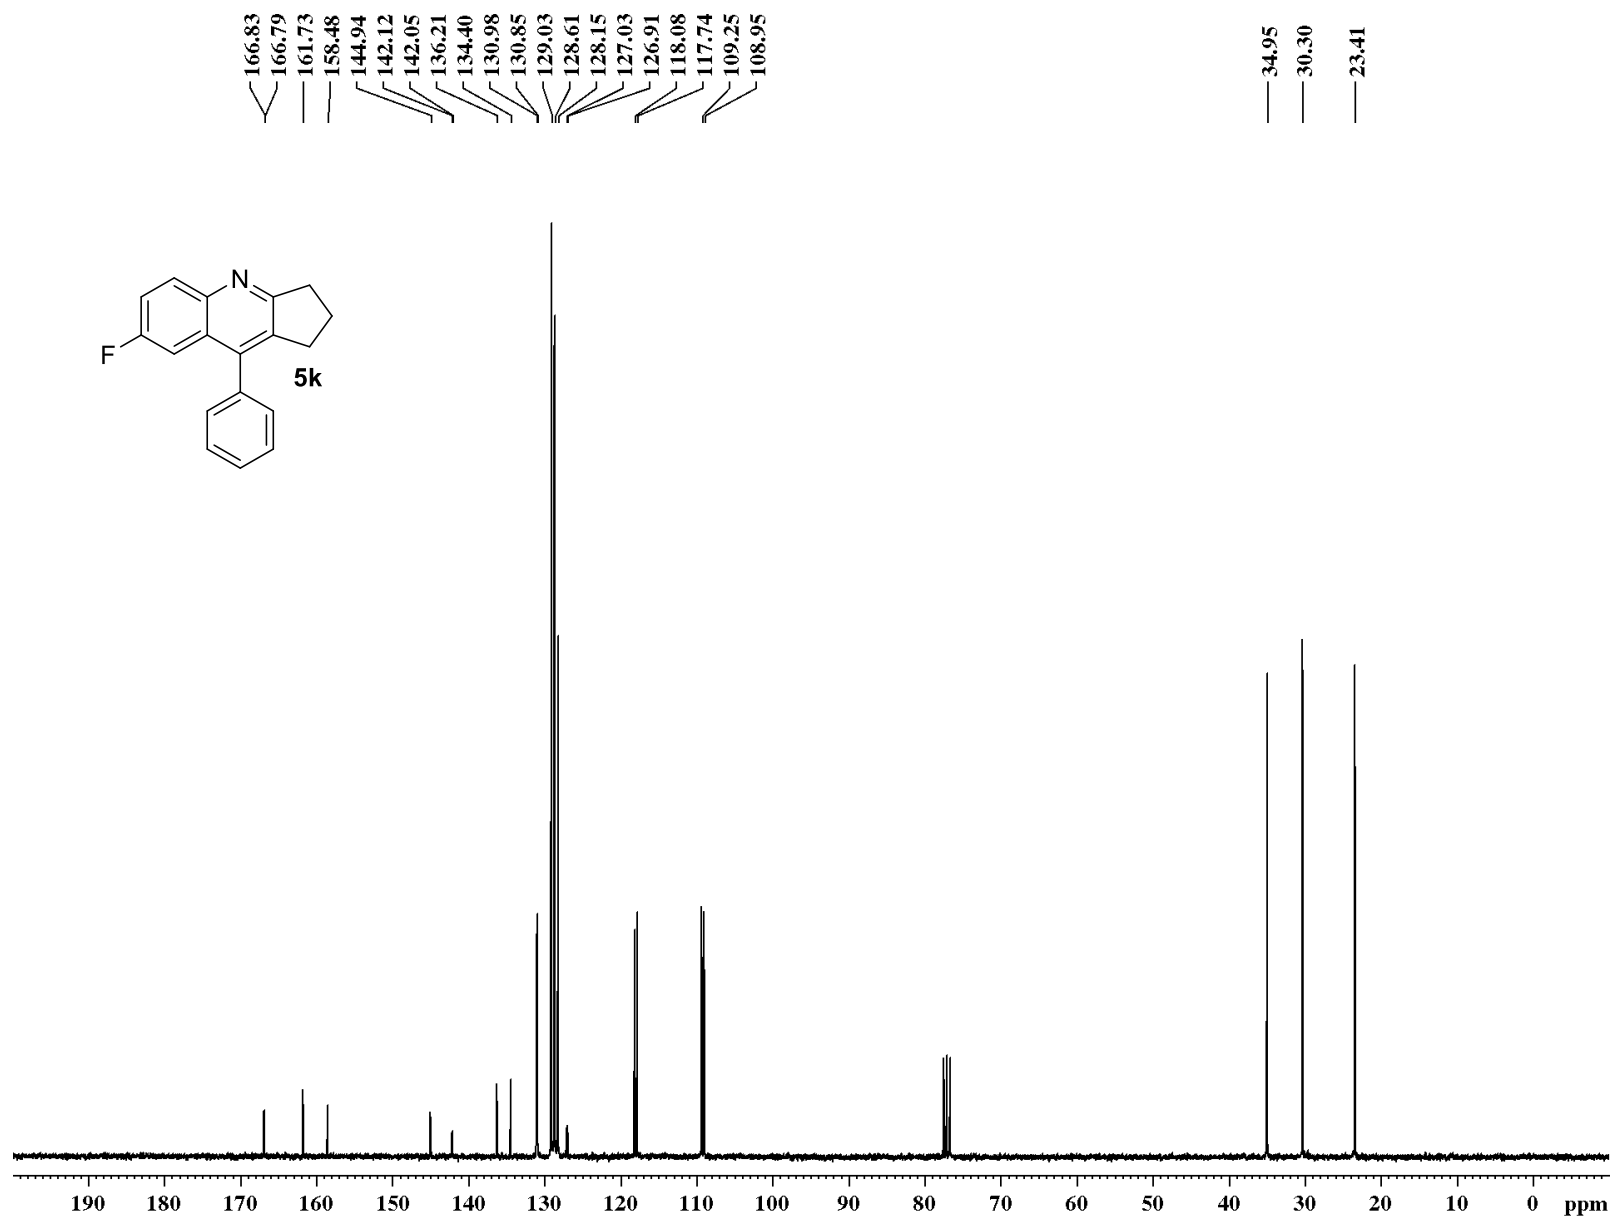

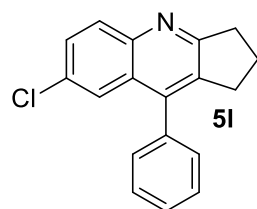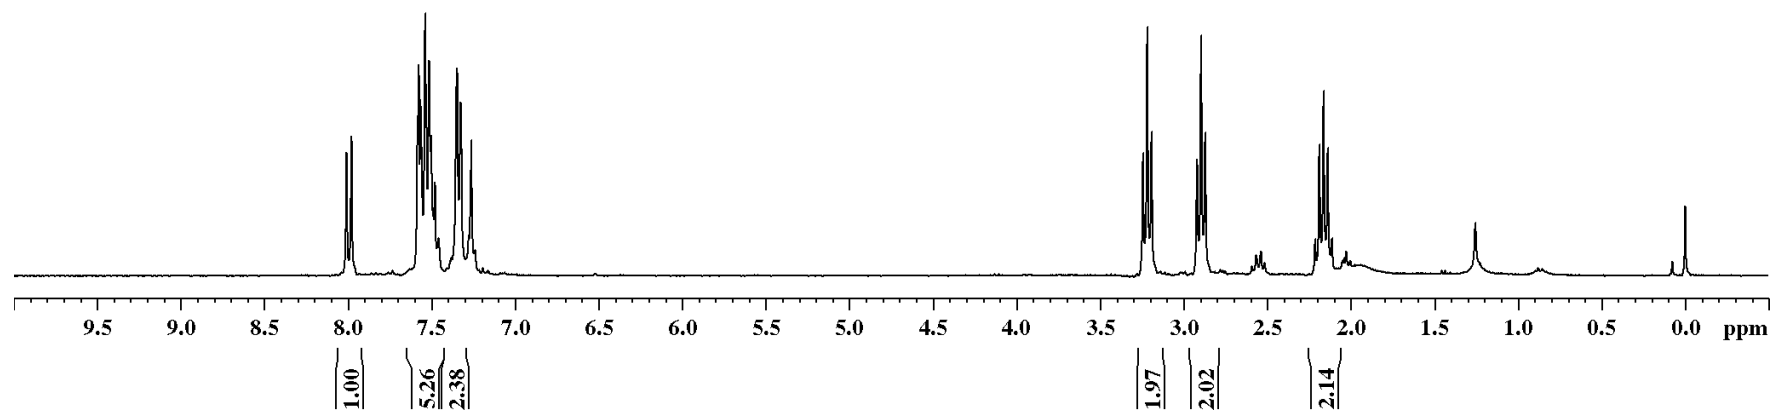

8.009  
7.979  
7.584  
7.578  
7.567  
7.560  
7.538  
7.514  
7.503  
7.490  
7.480  
7.466  
7.459  
7.352  
7.347  
7.326

3.244  
3.218  
3.193  
2.921  
2.896  
2.871  
2.214  
2.188  
2.163  
2.138  
2.113

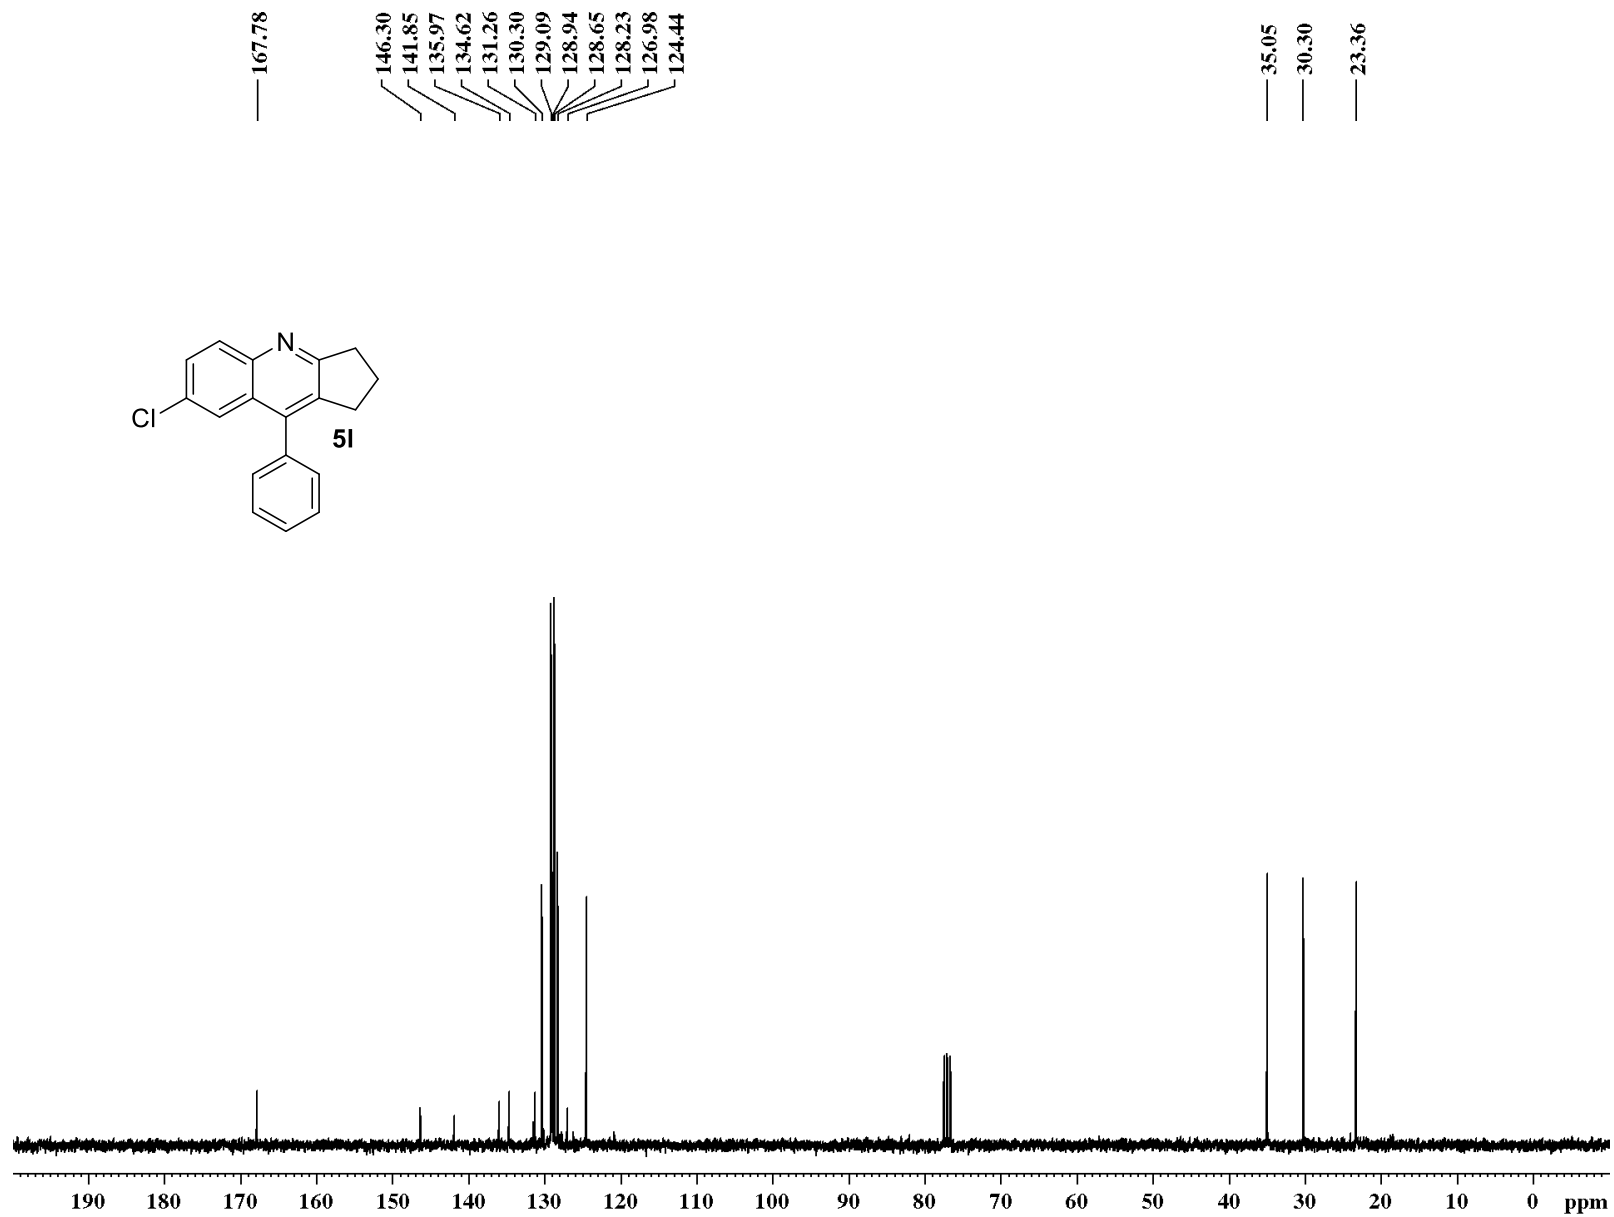

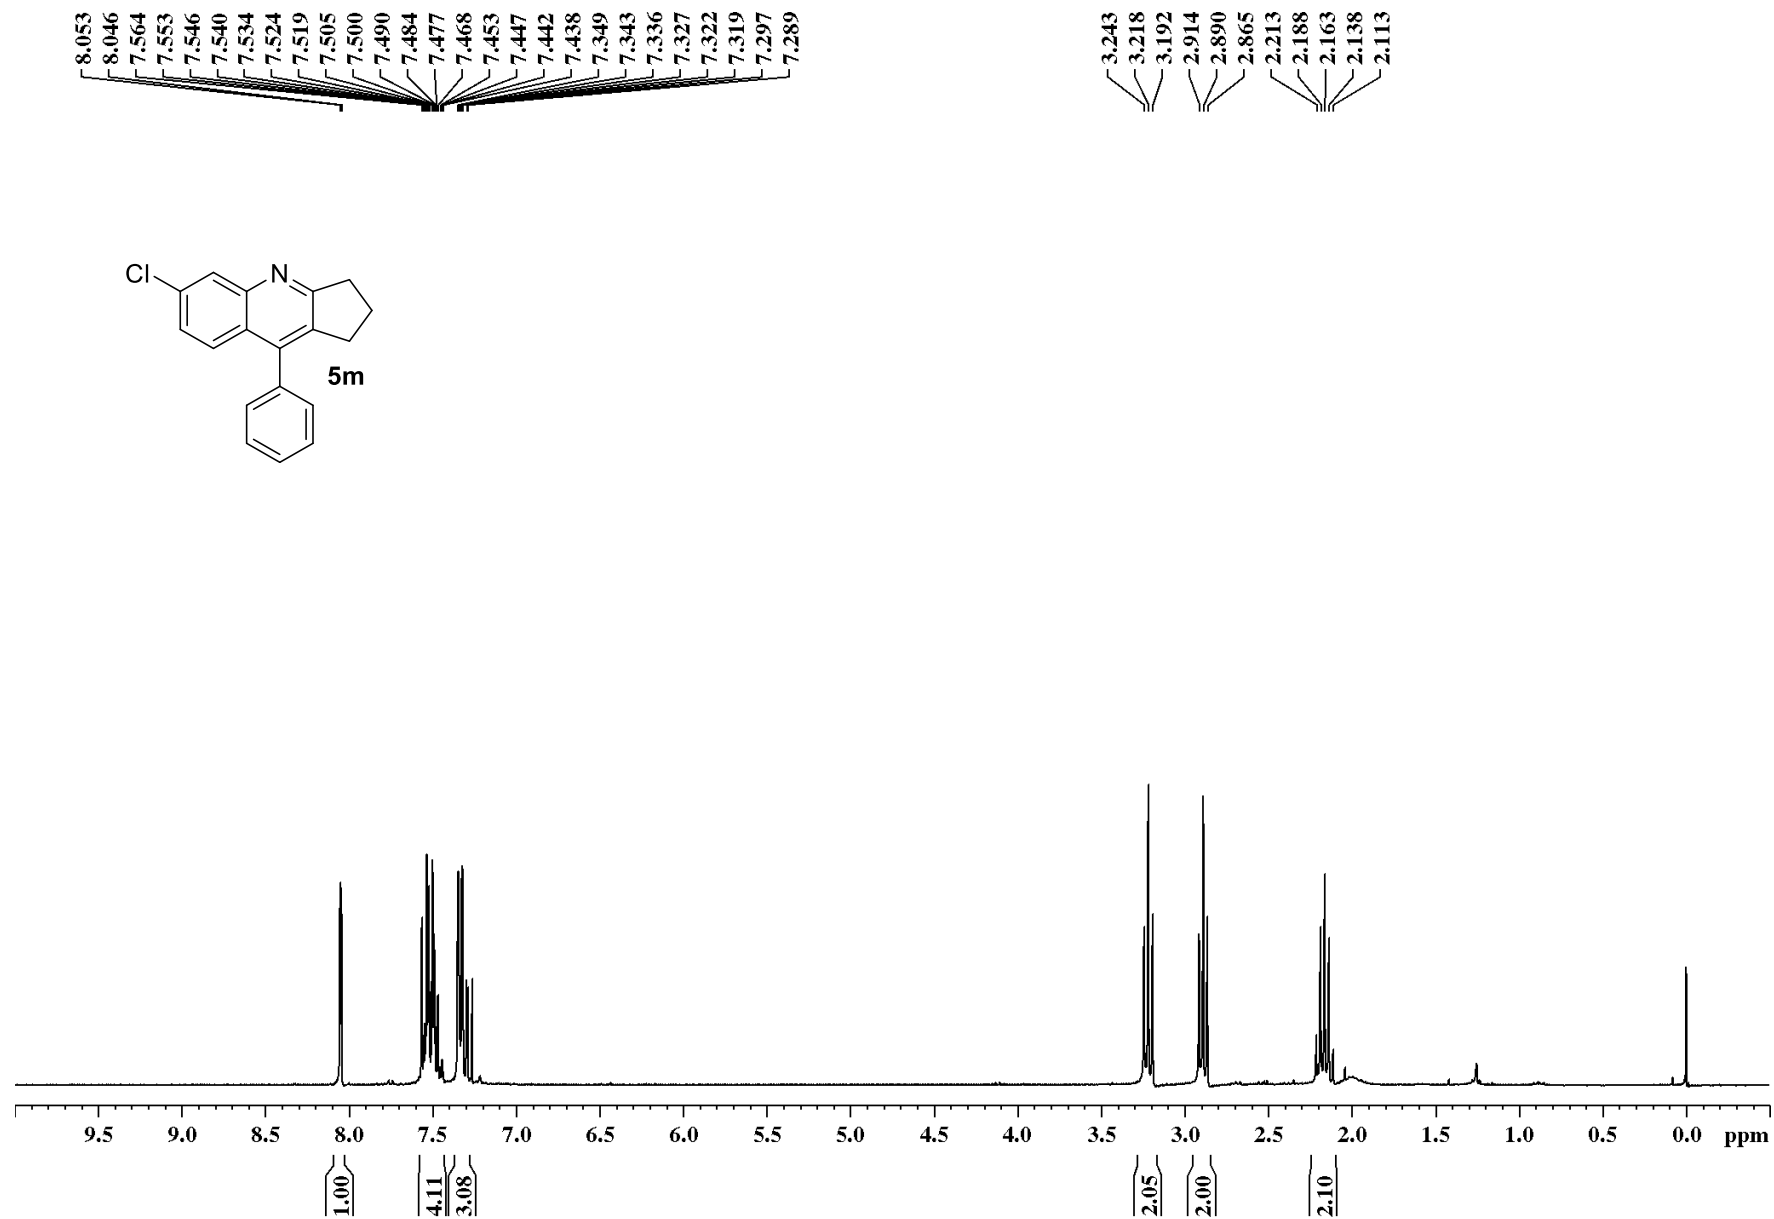

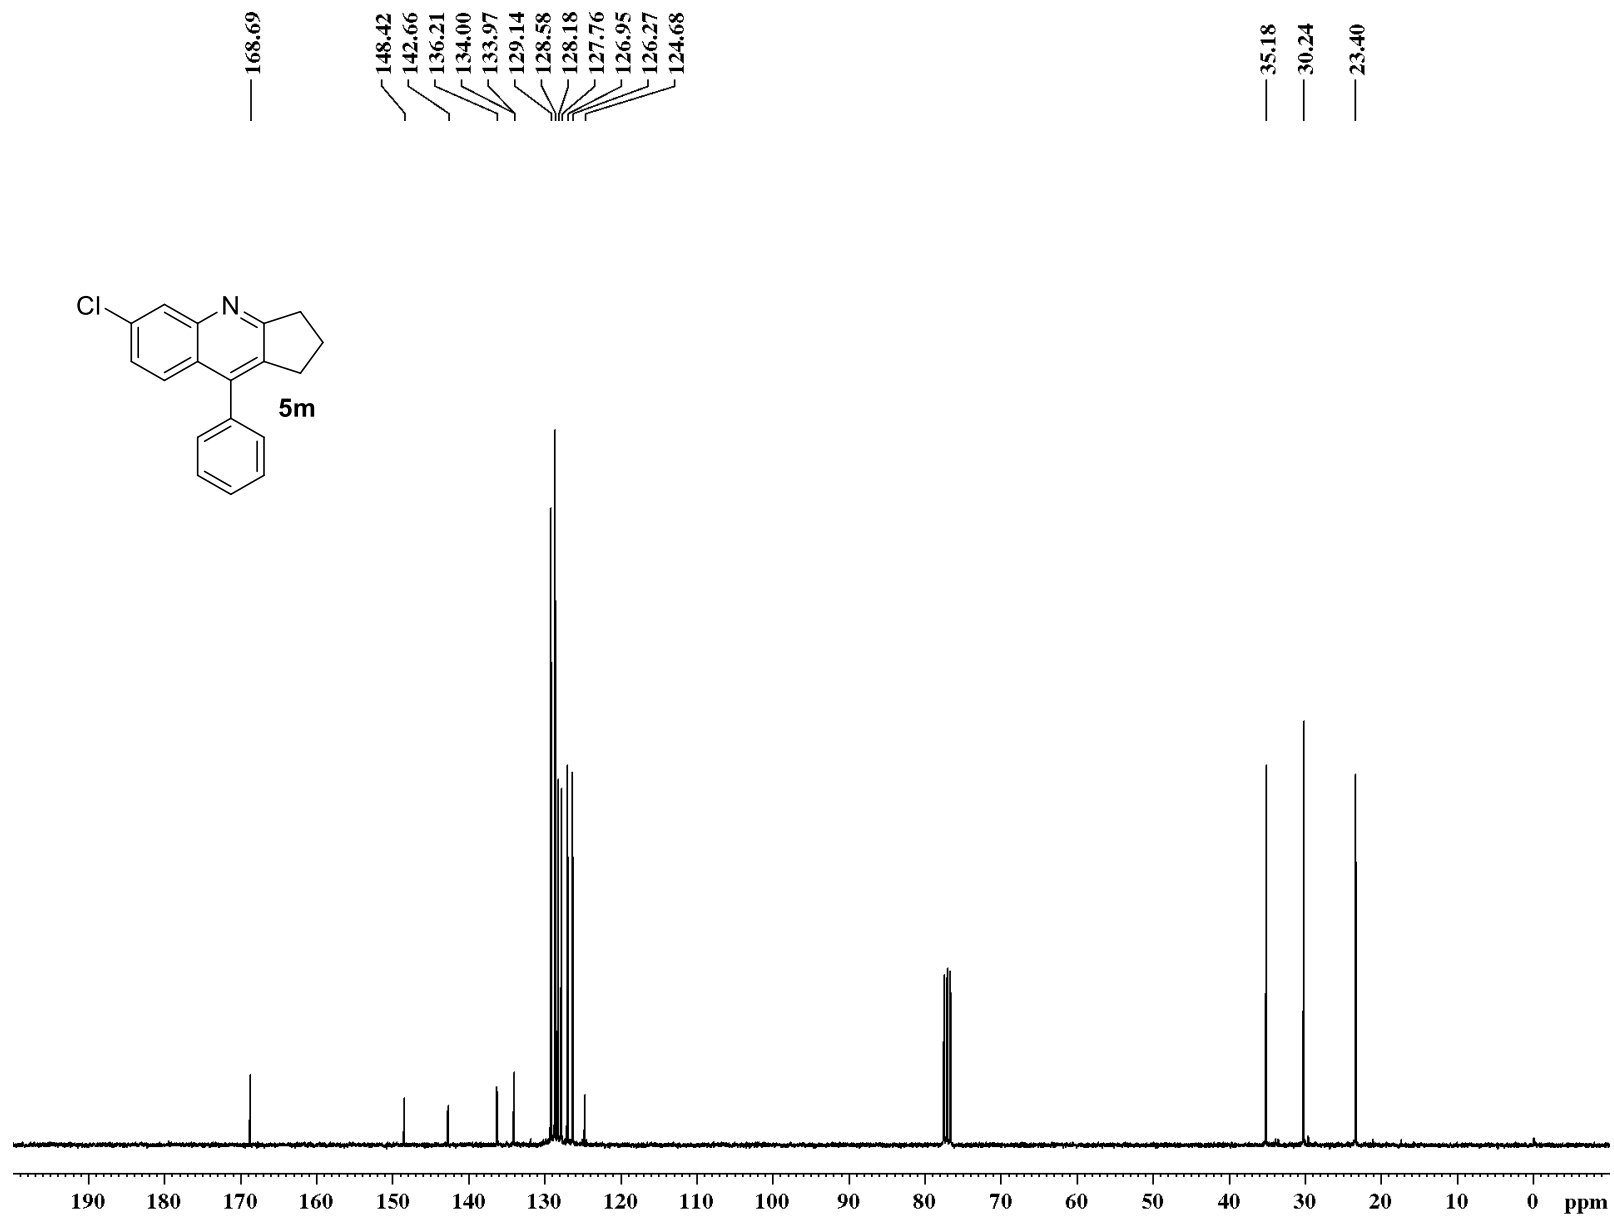

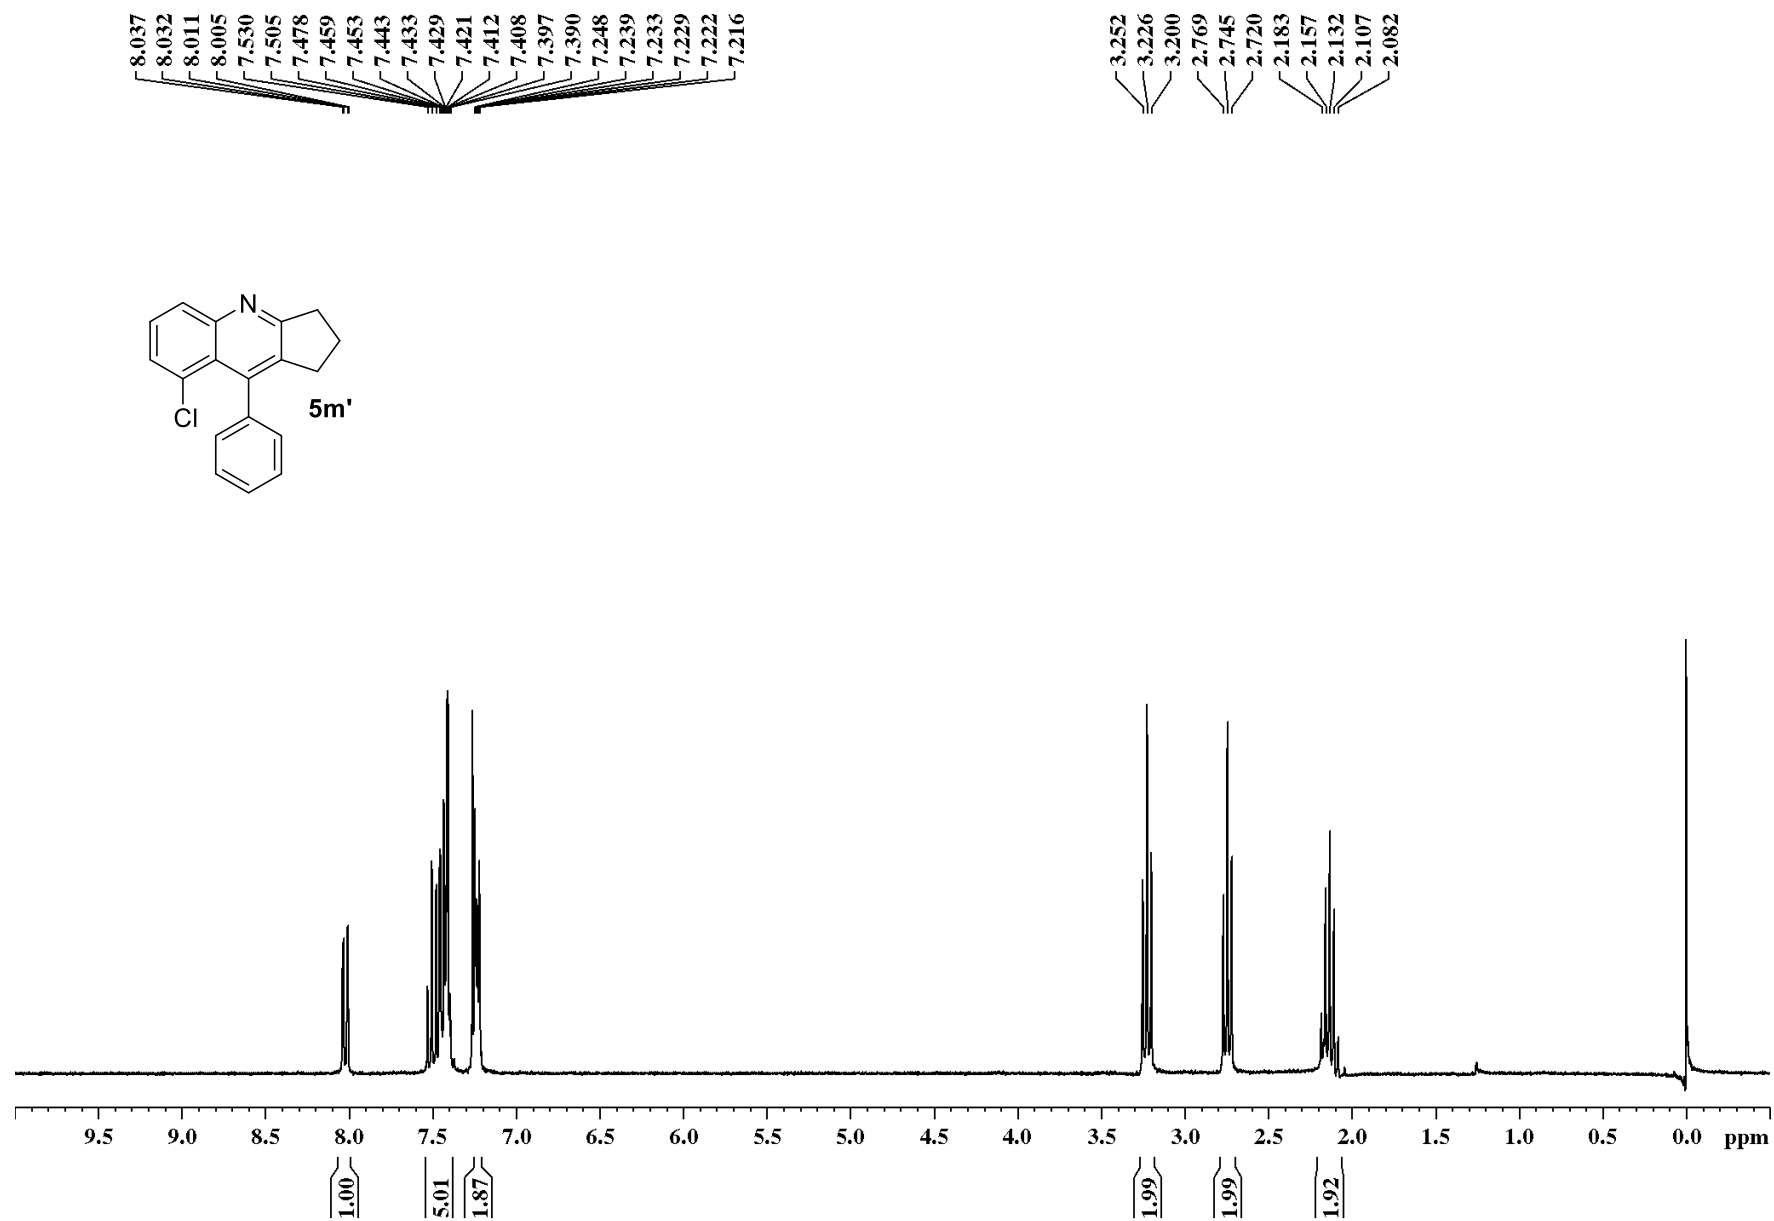



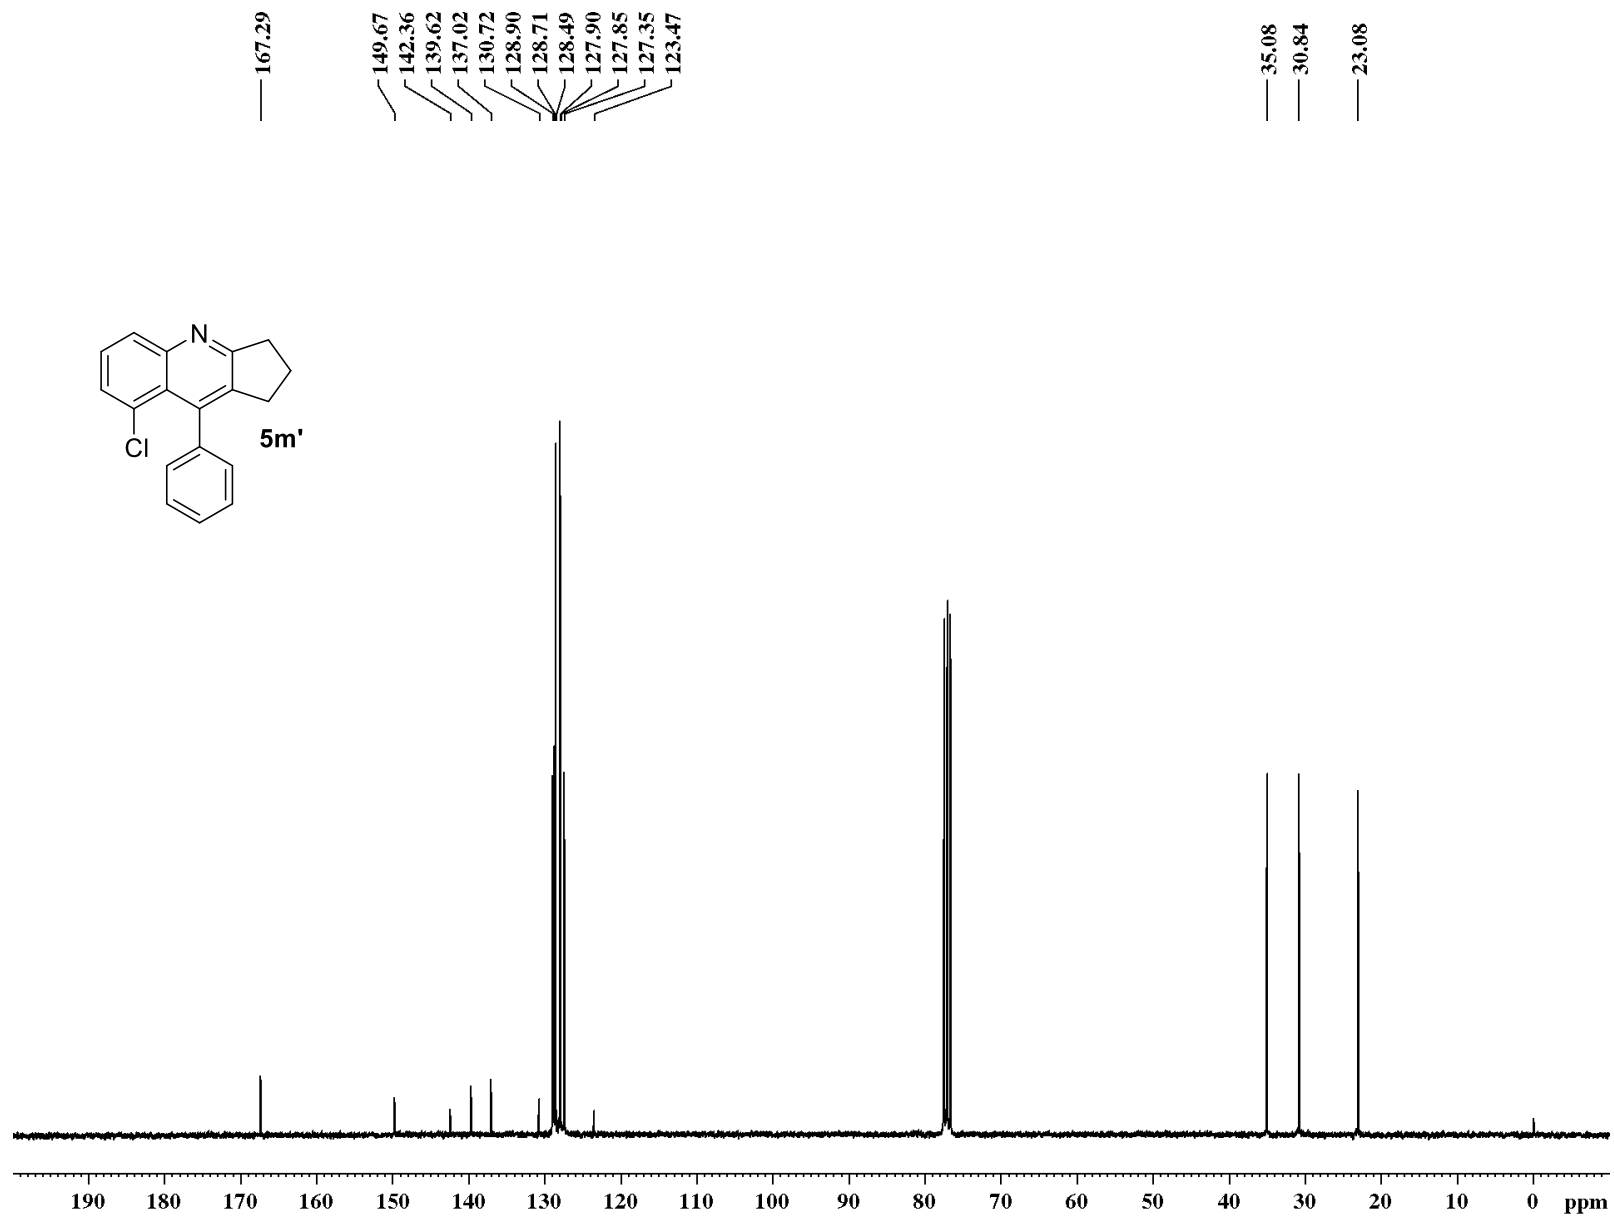

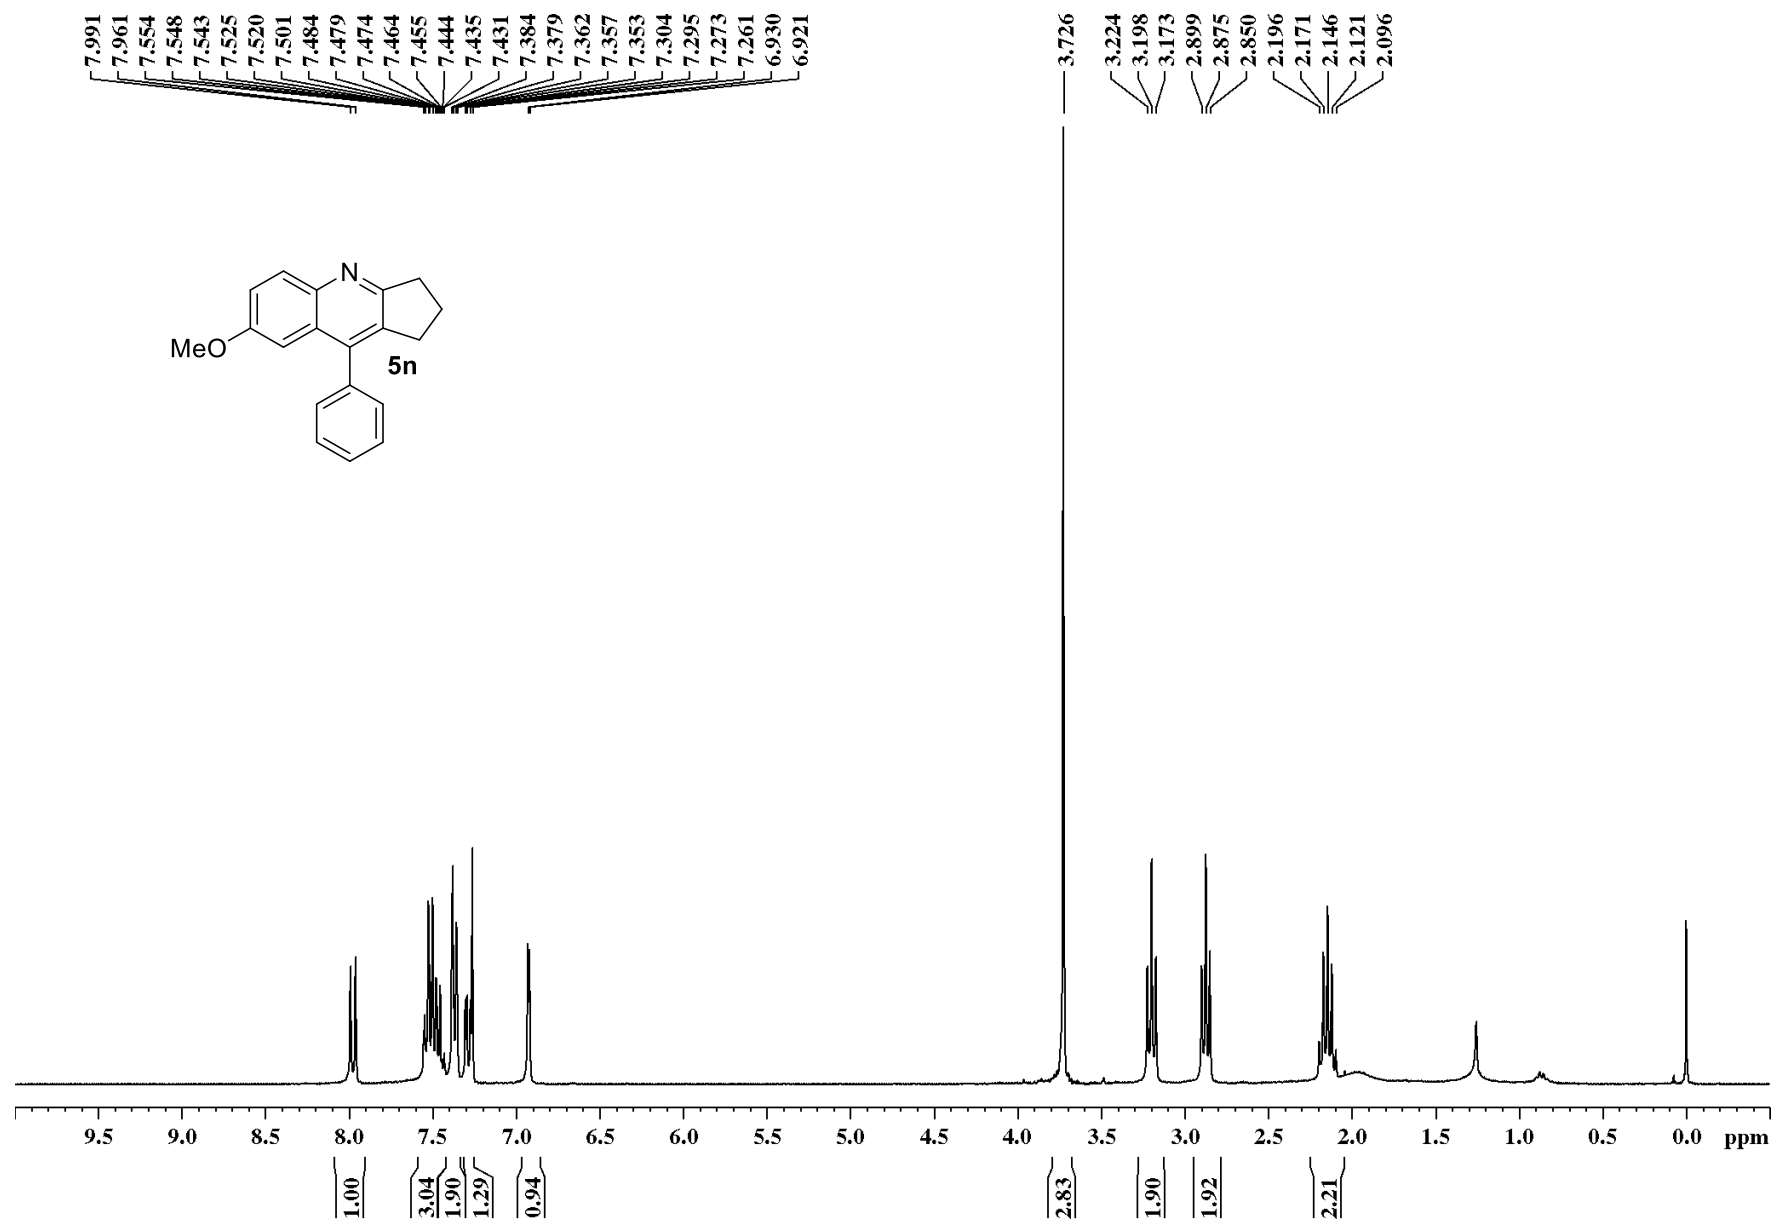

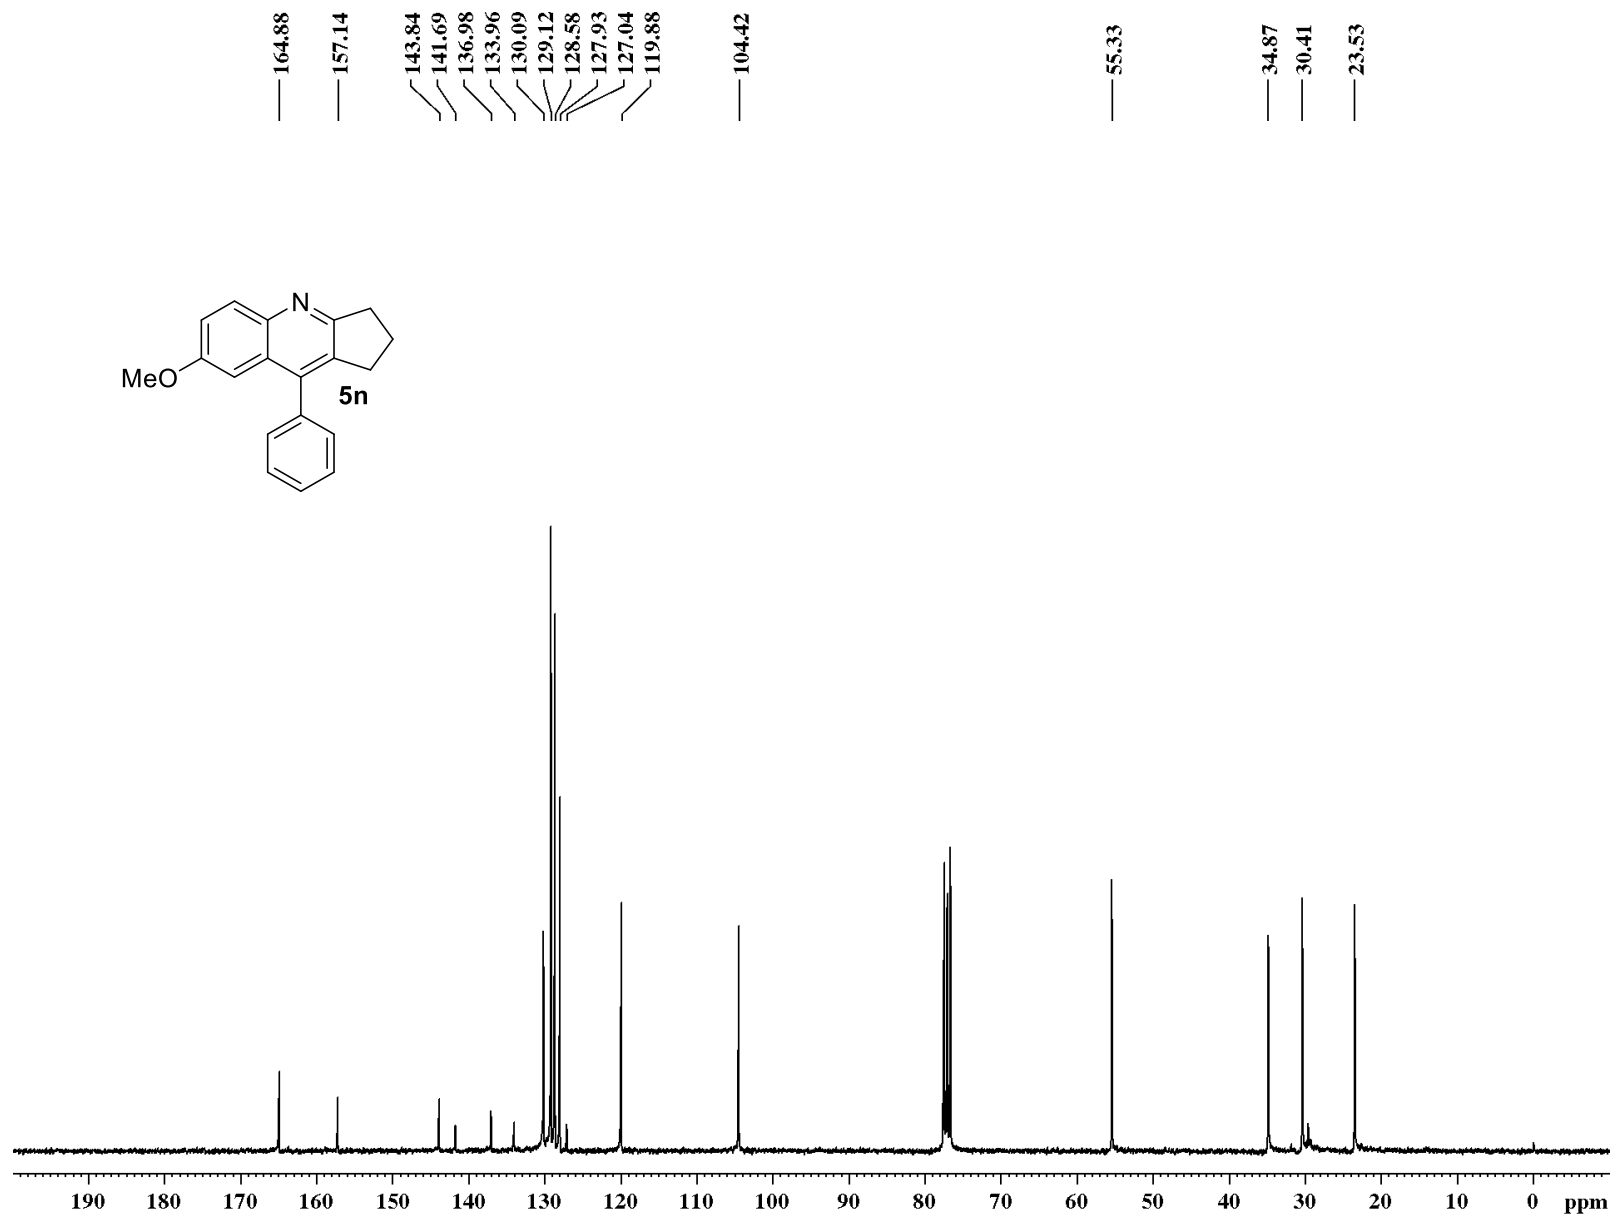

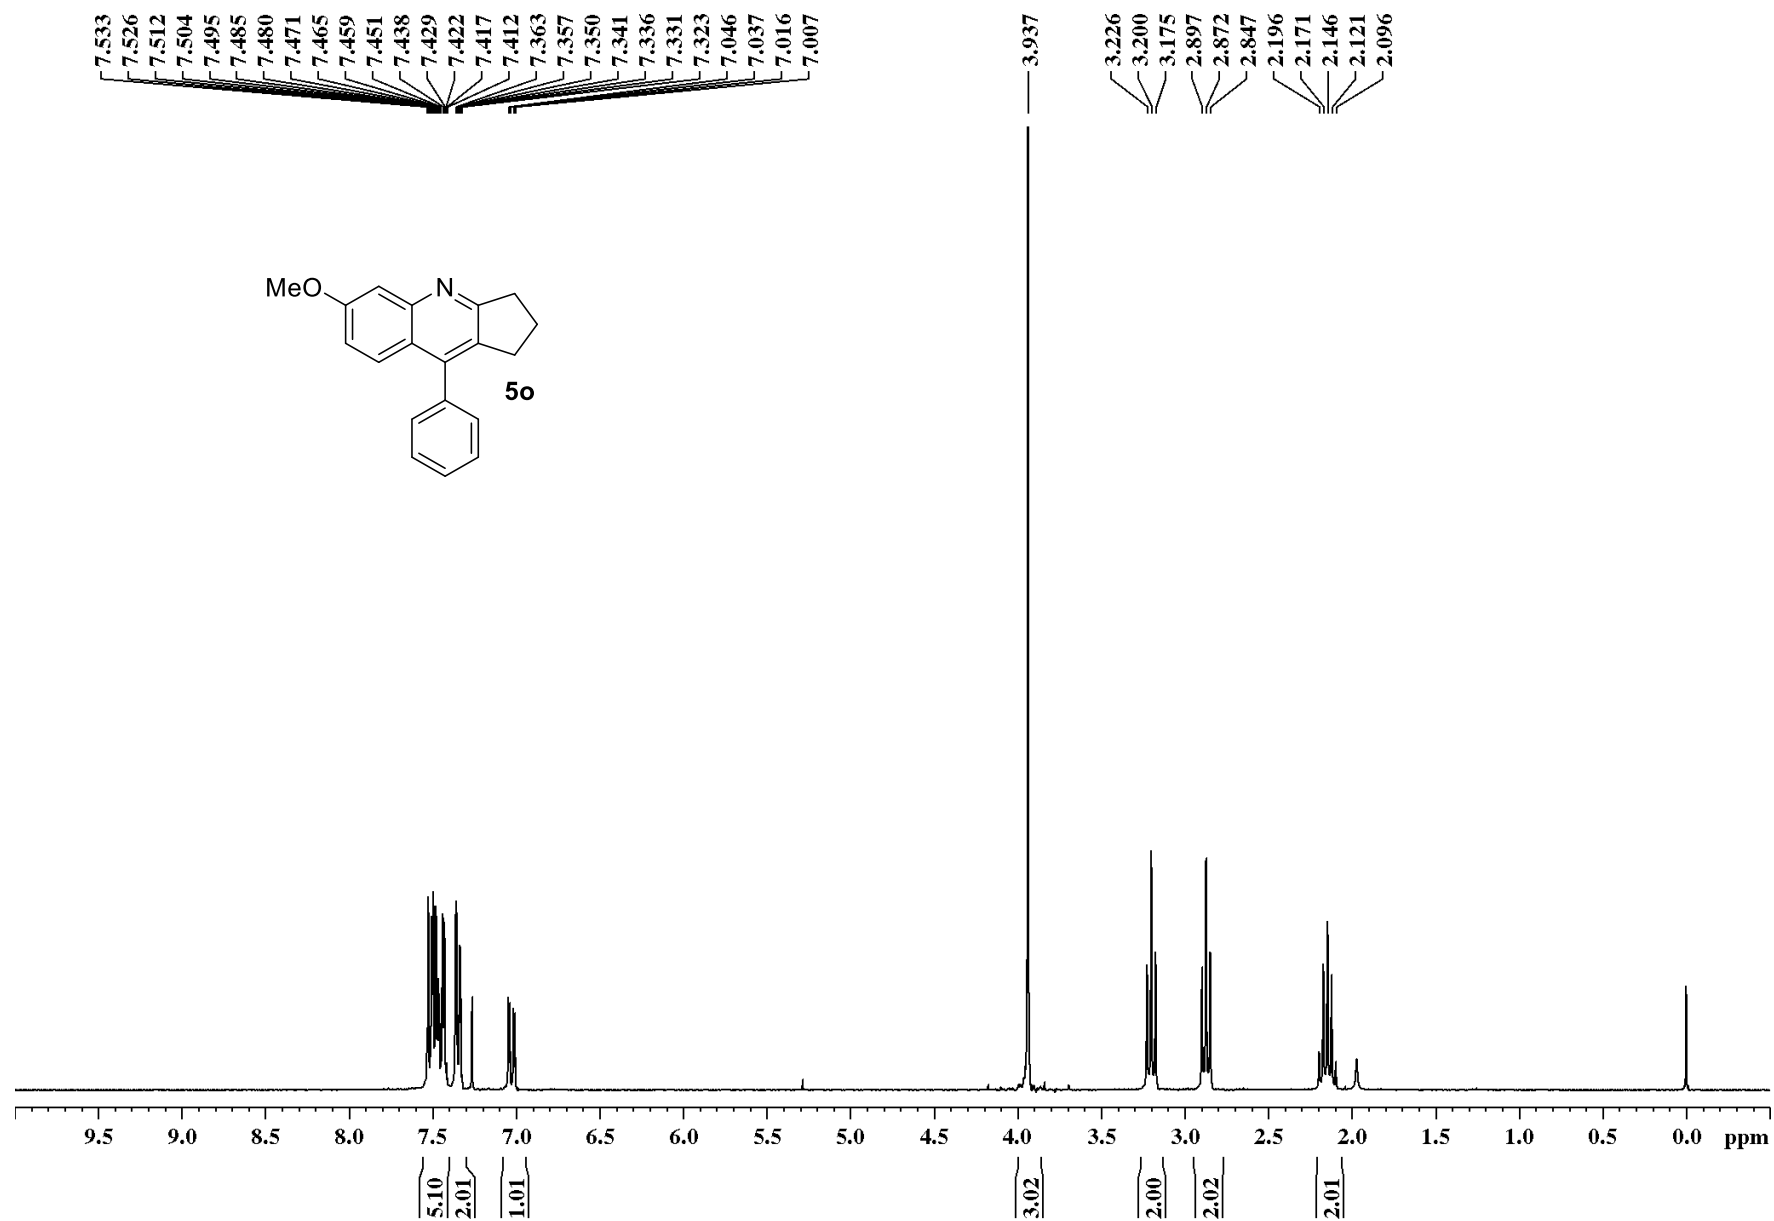

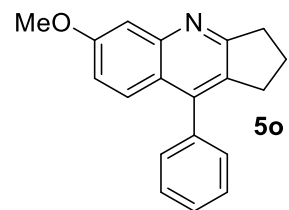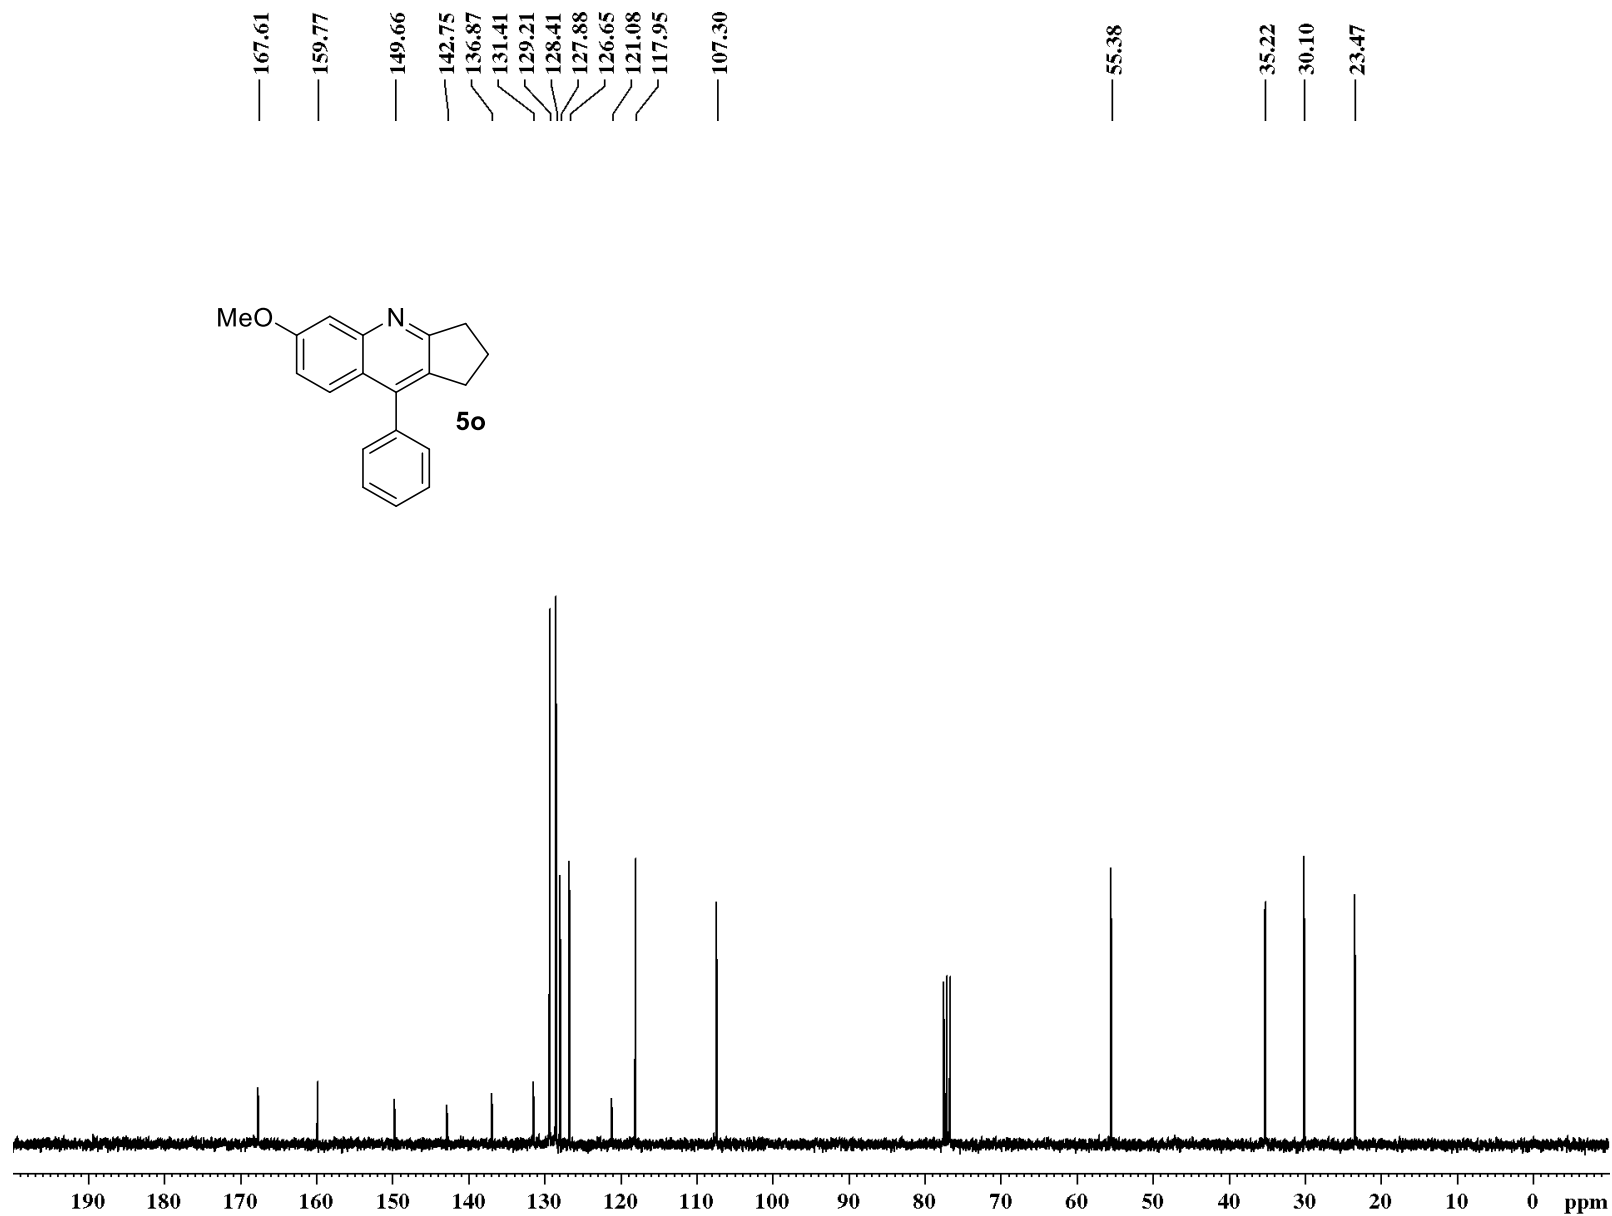

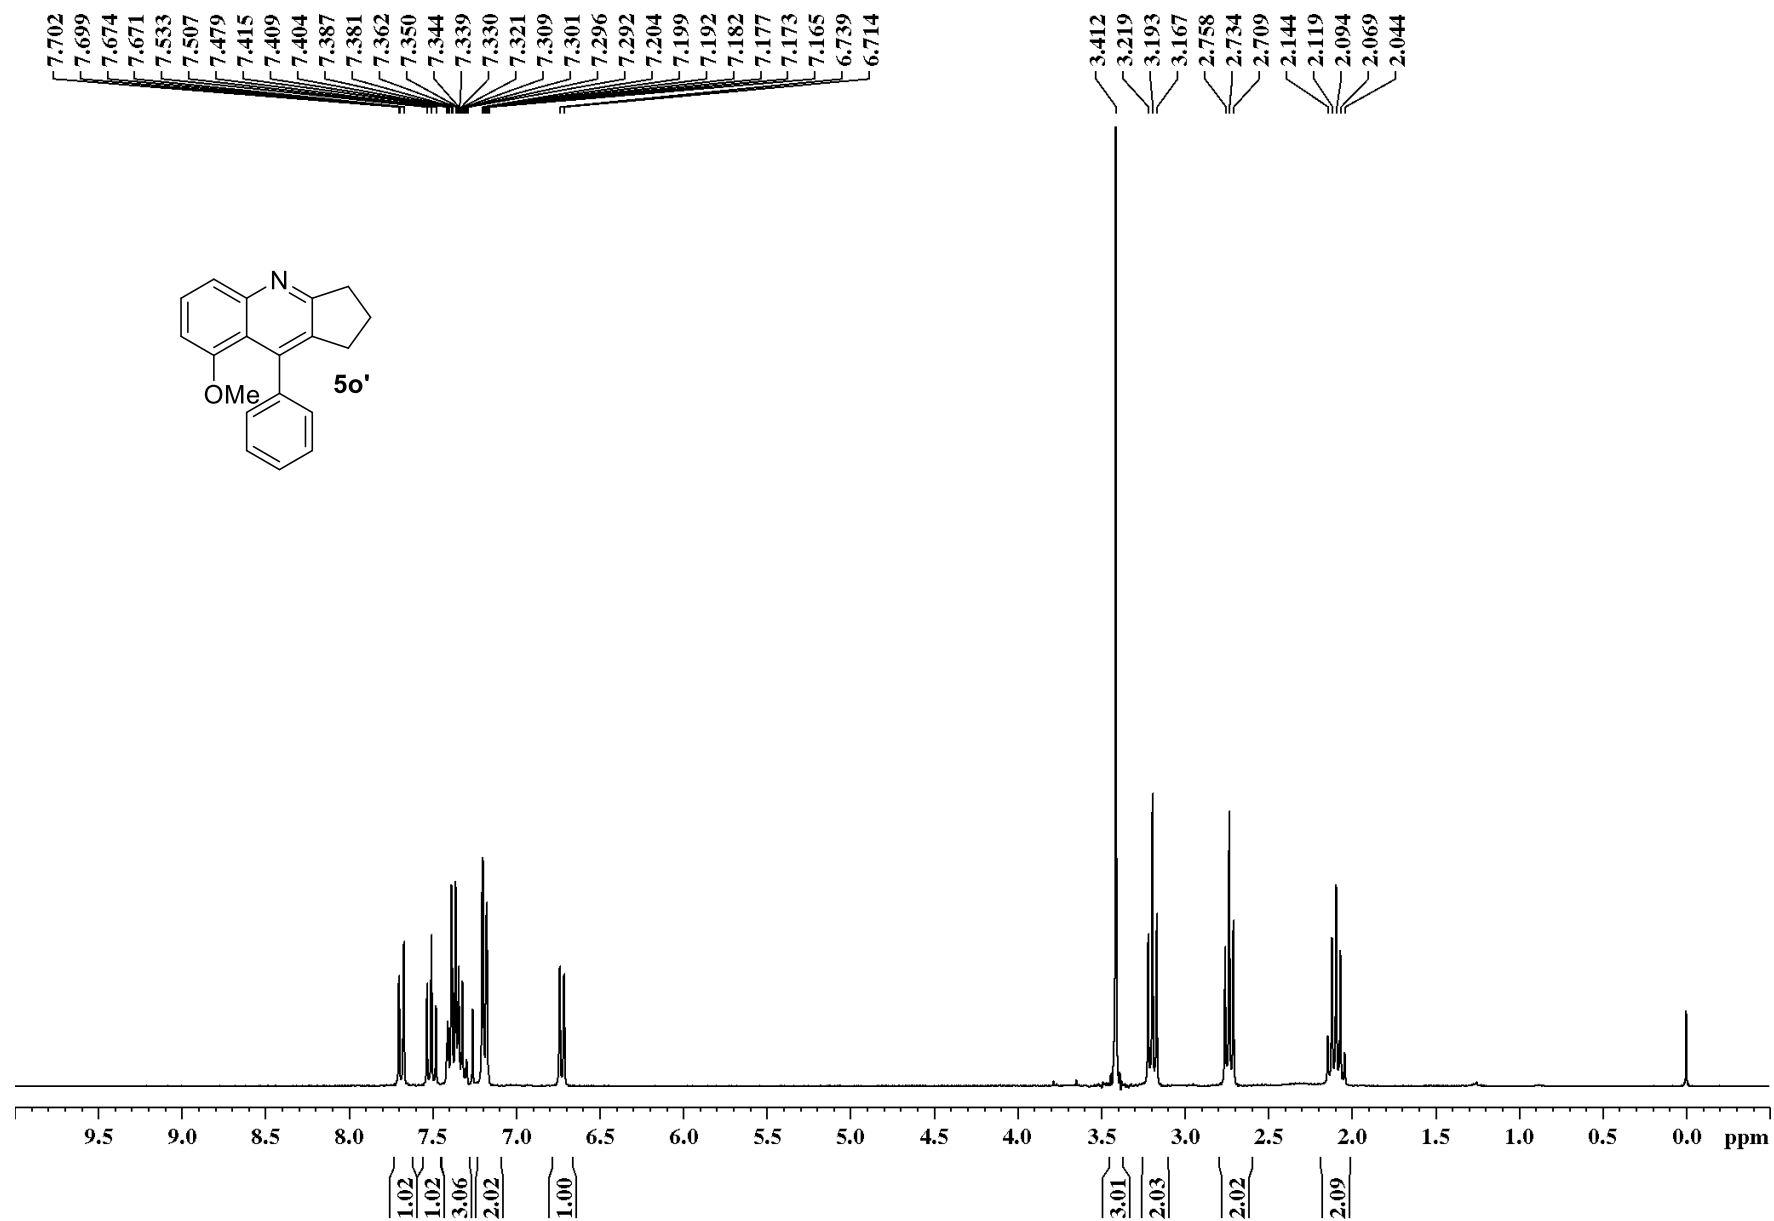

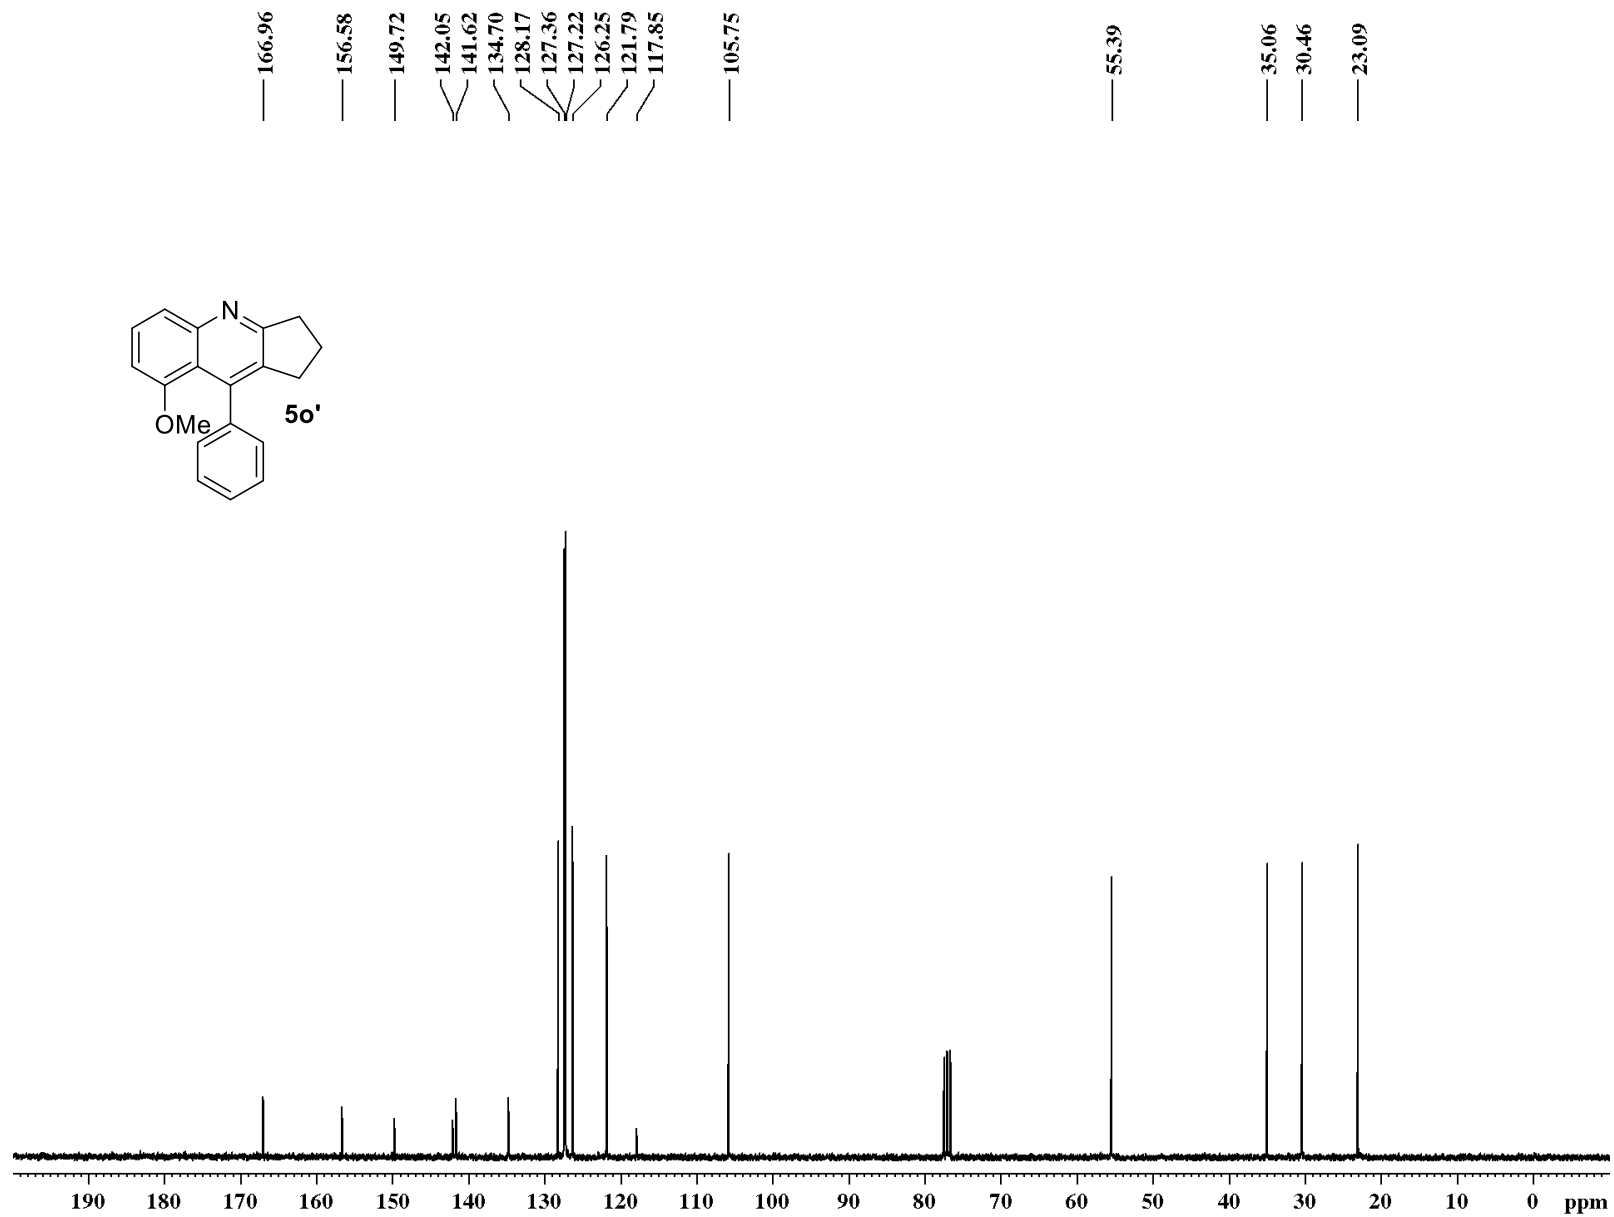

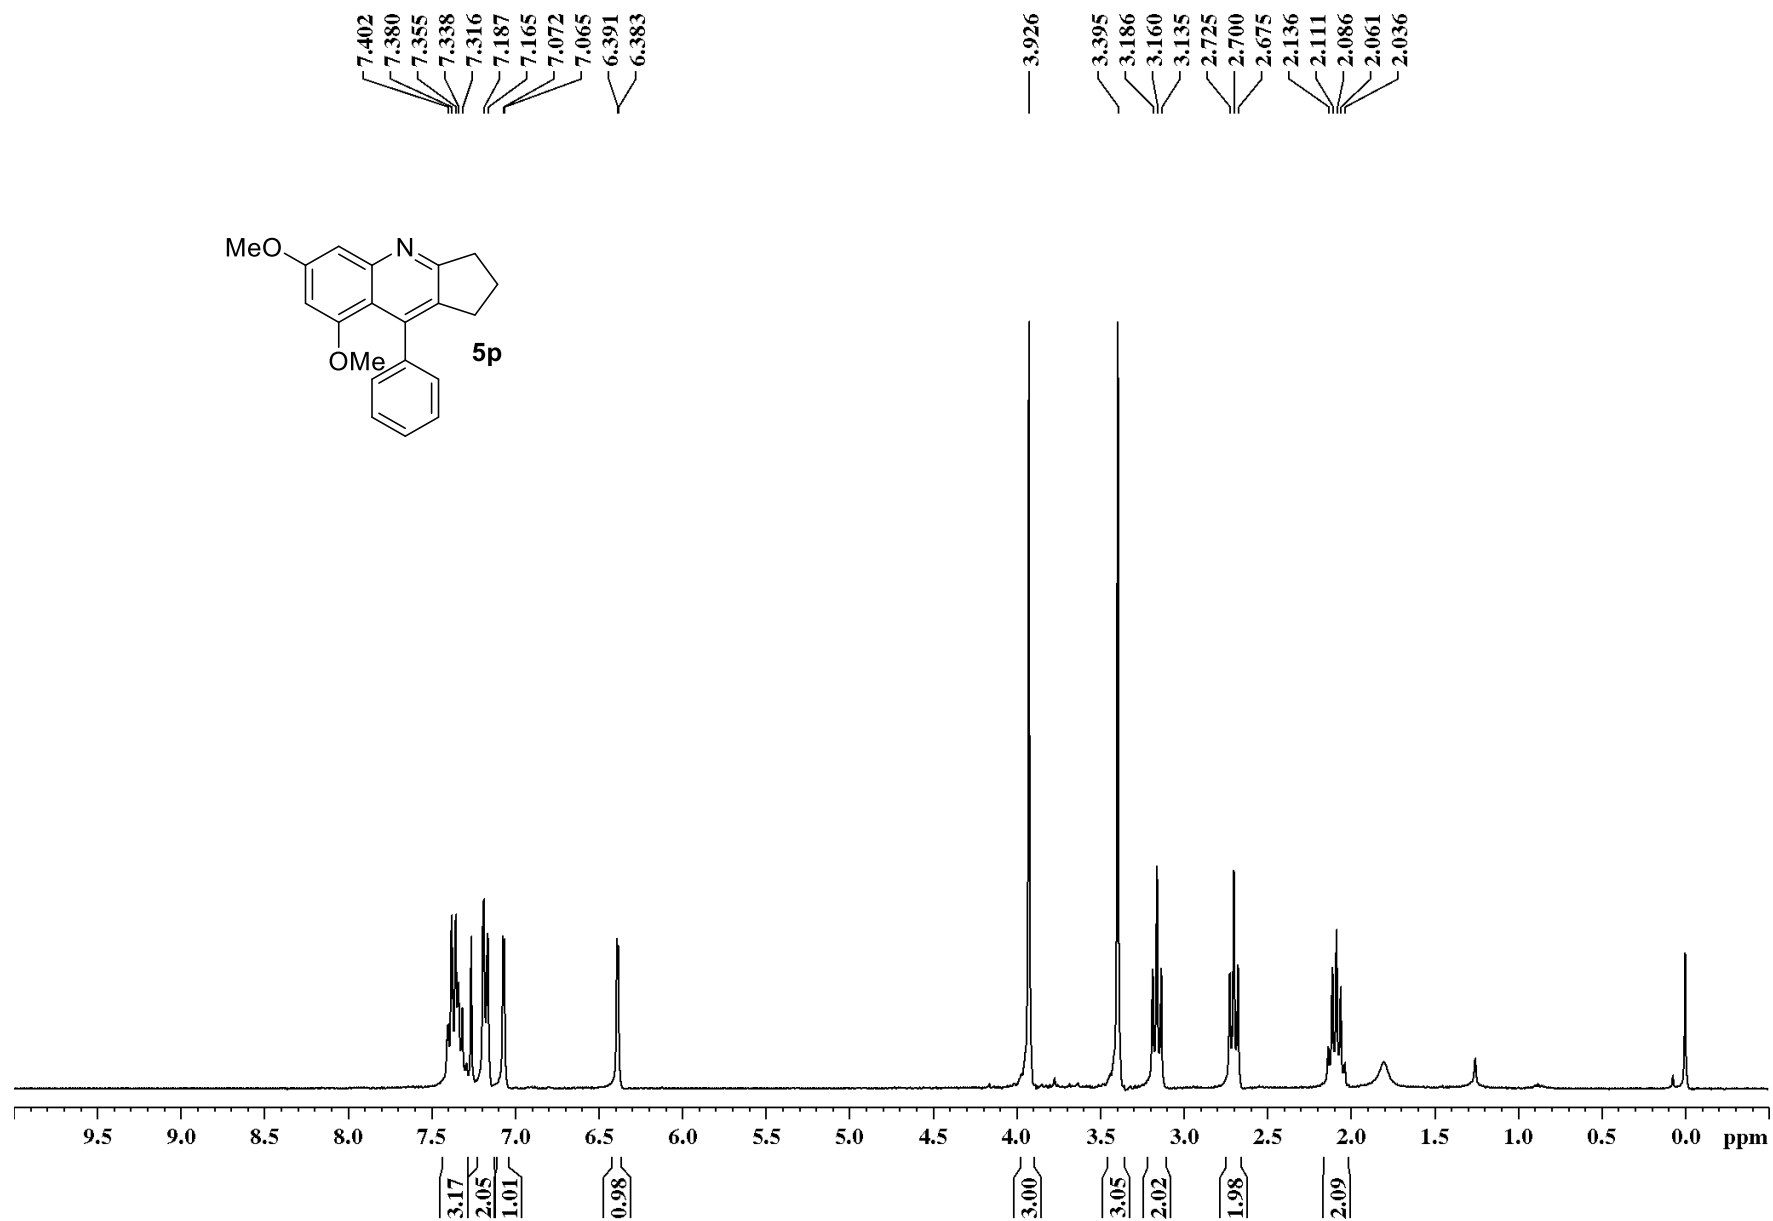



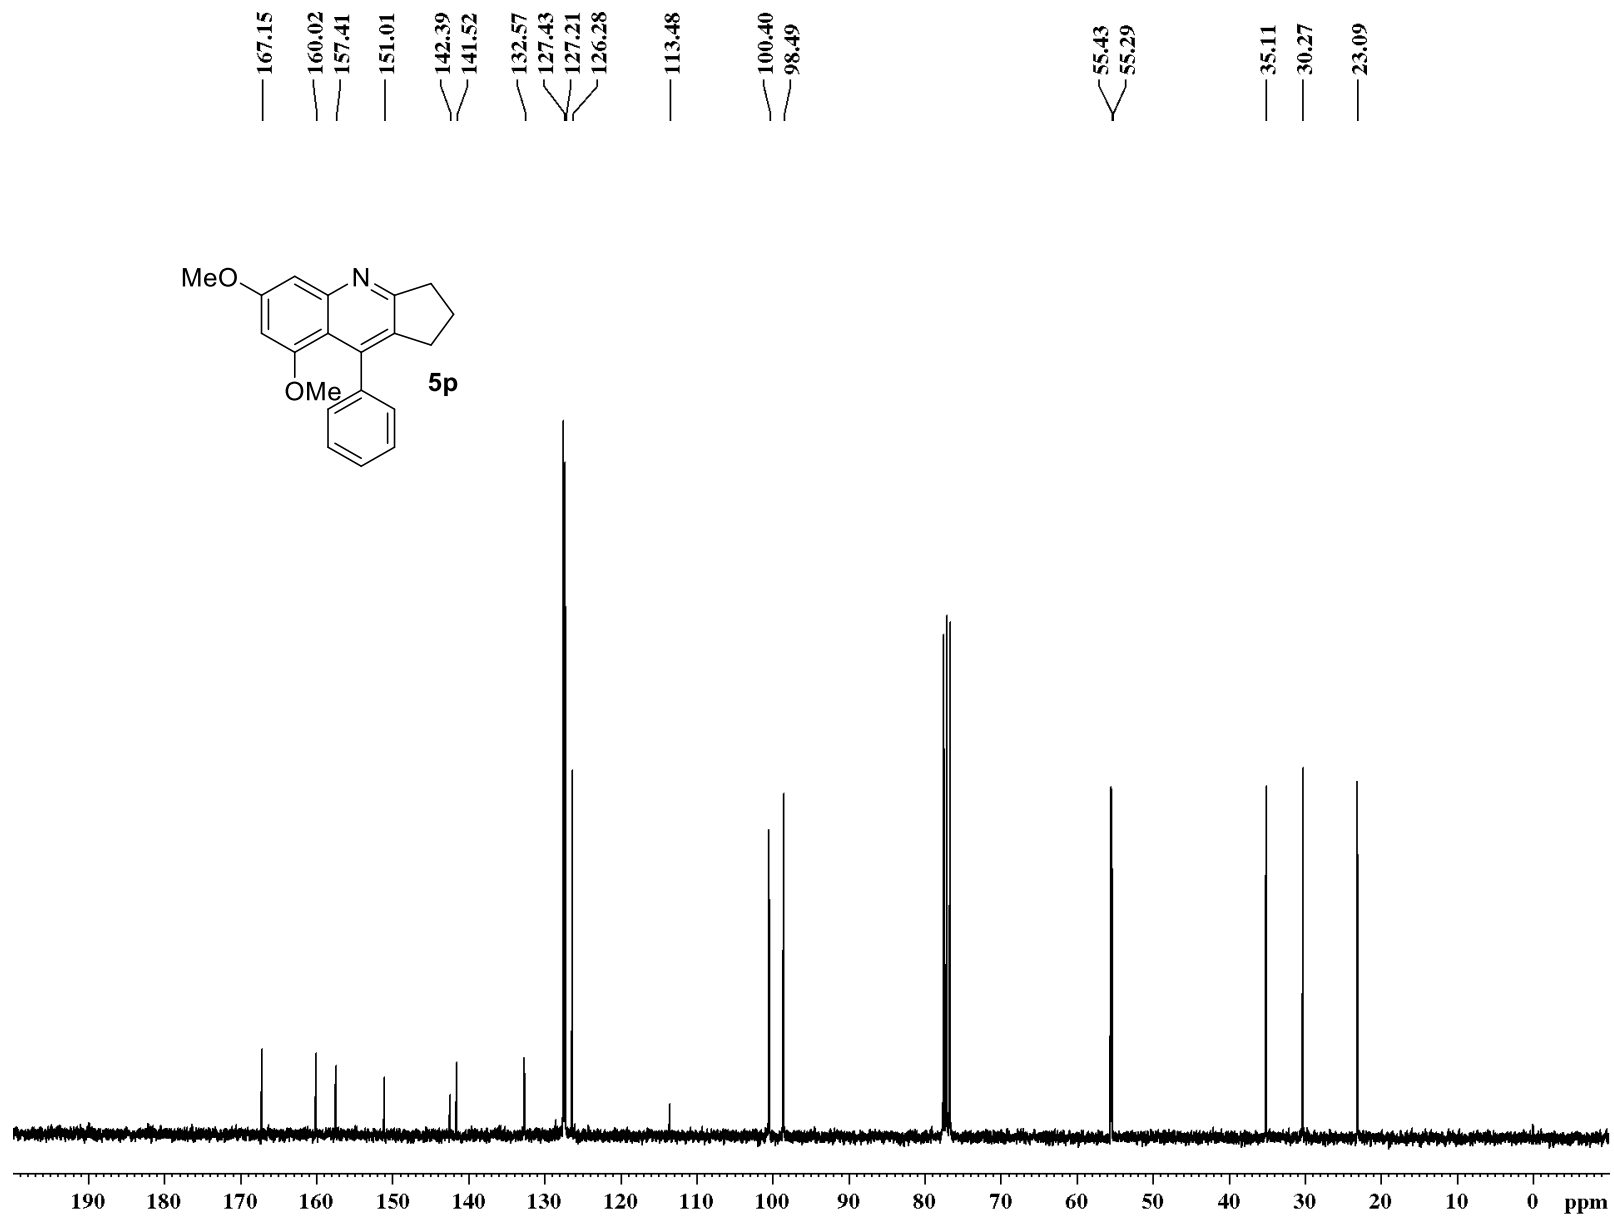

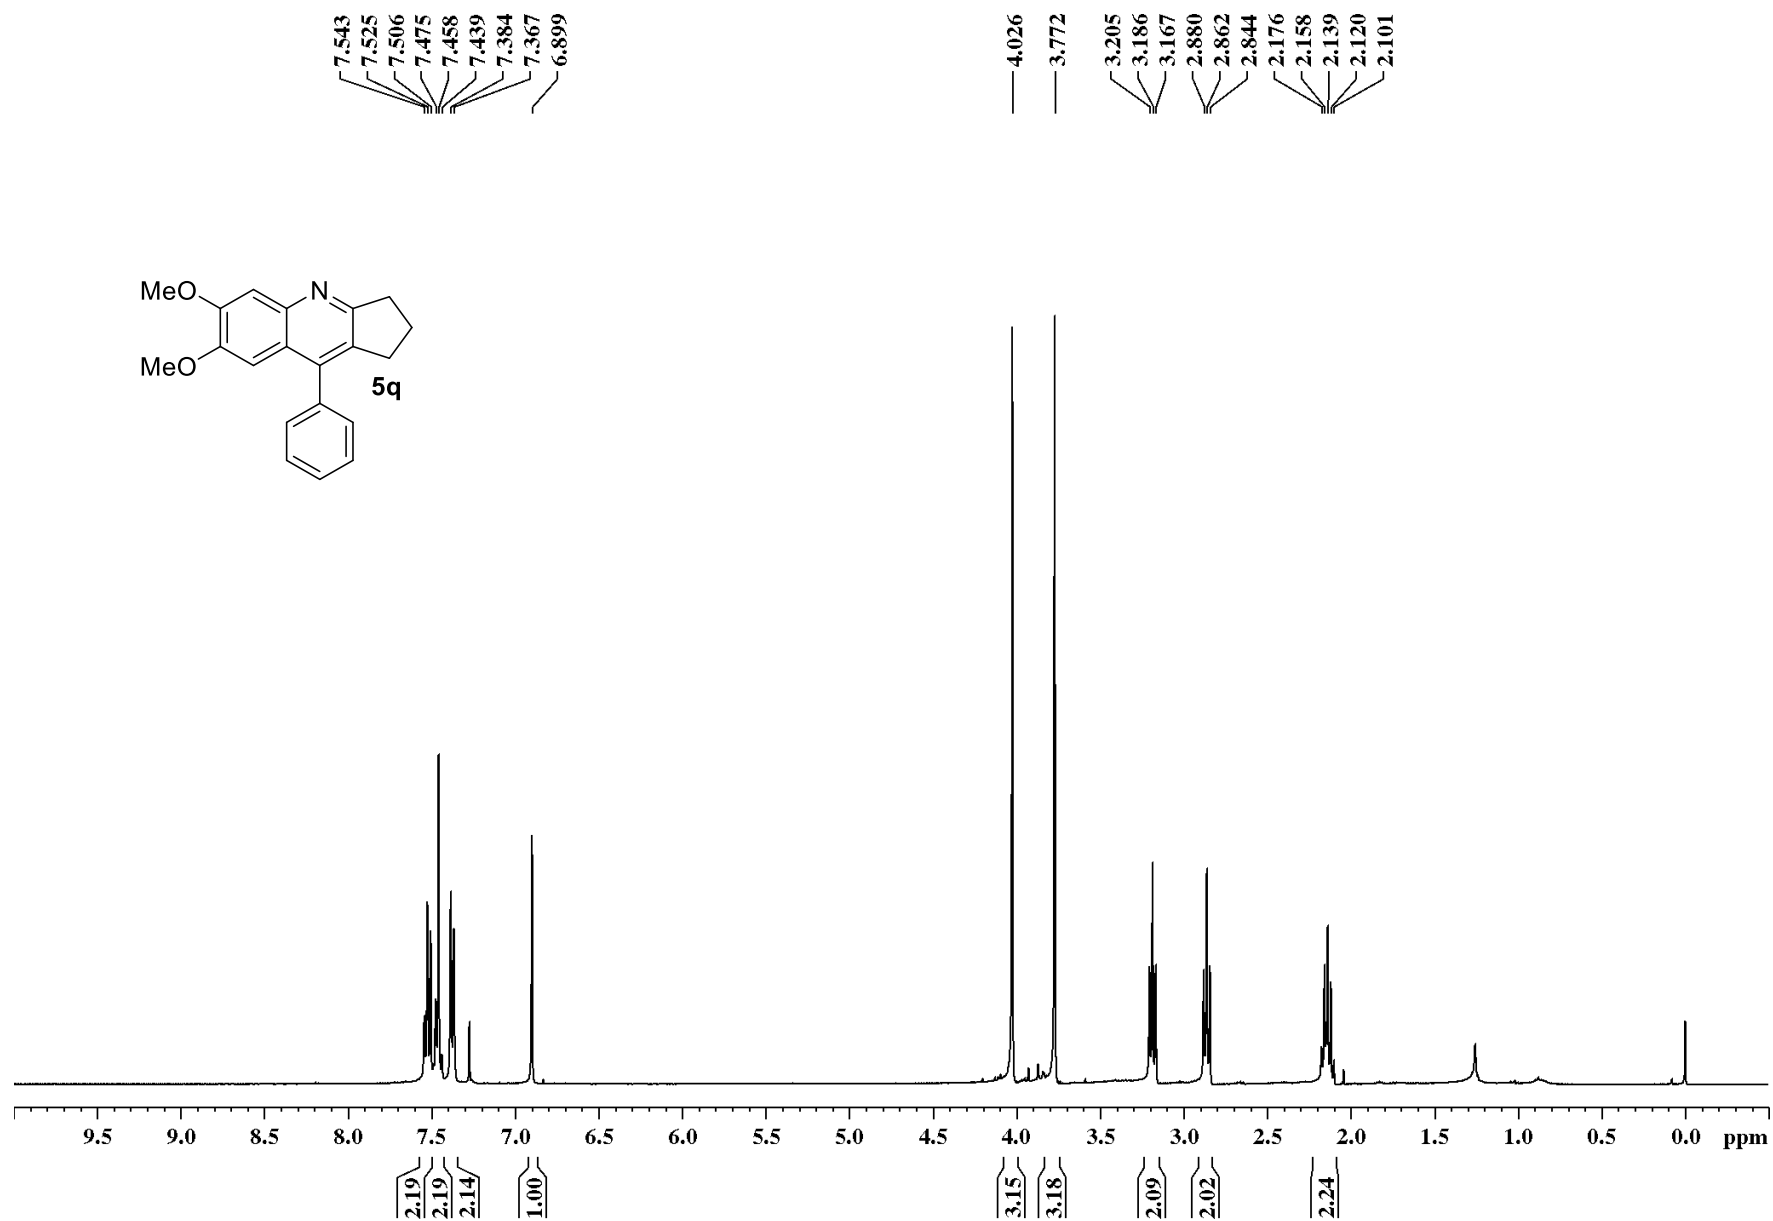

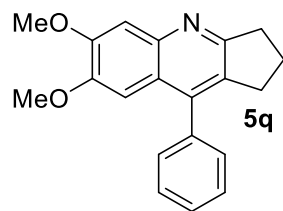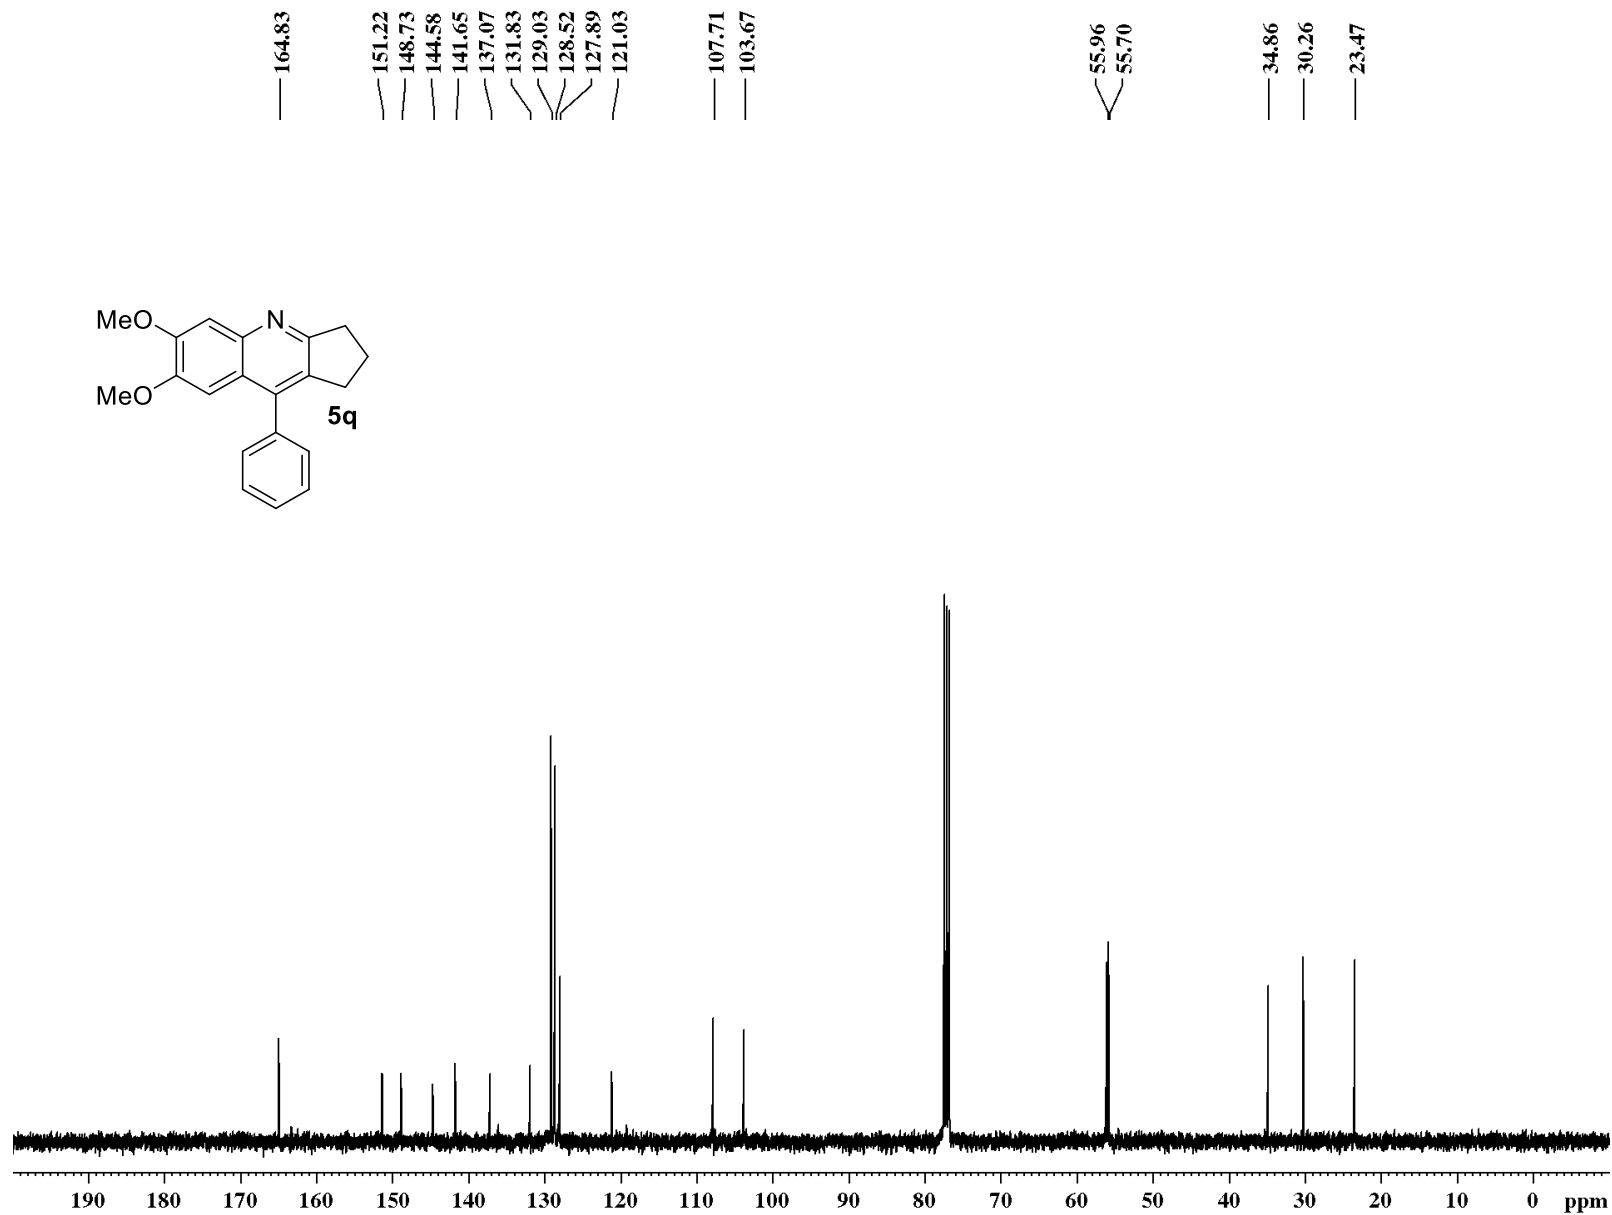

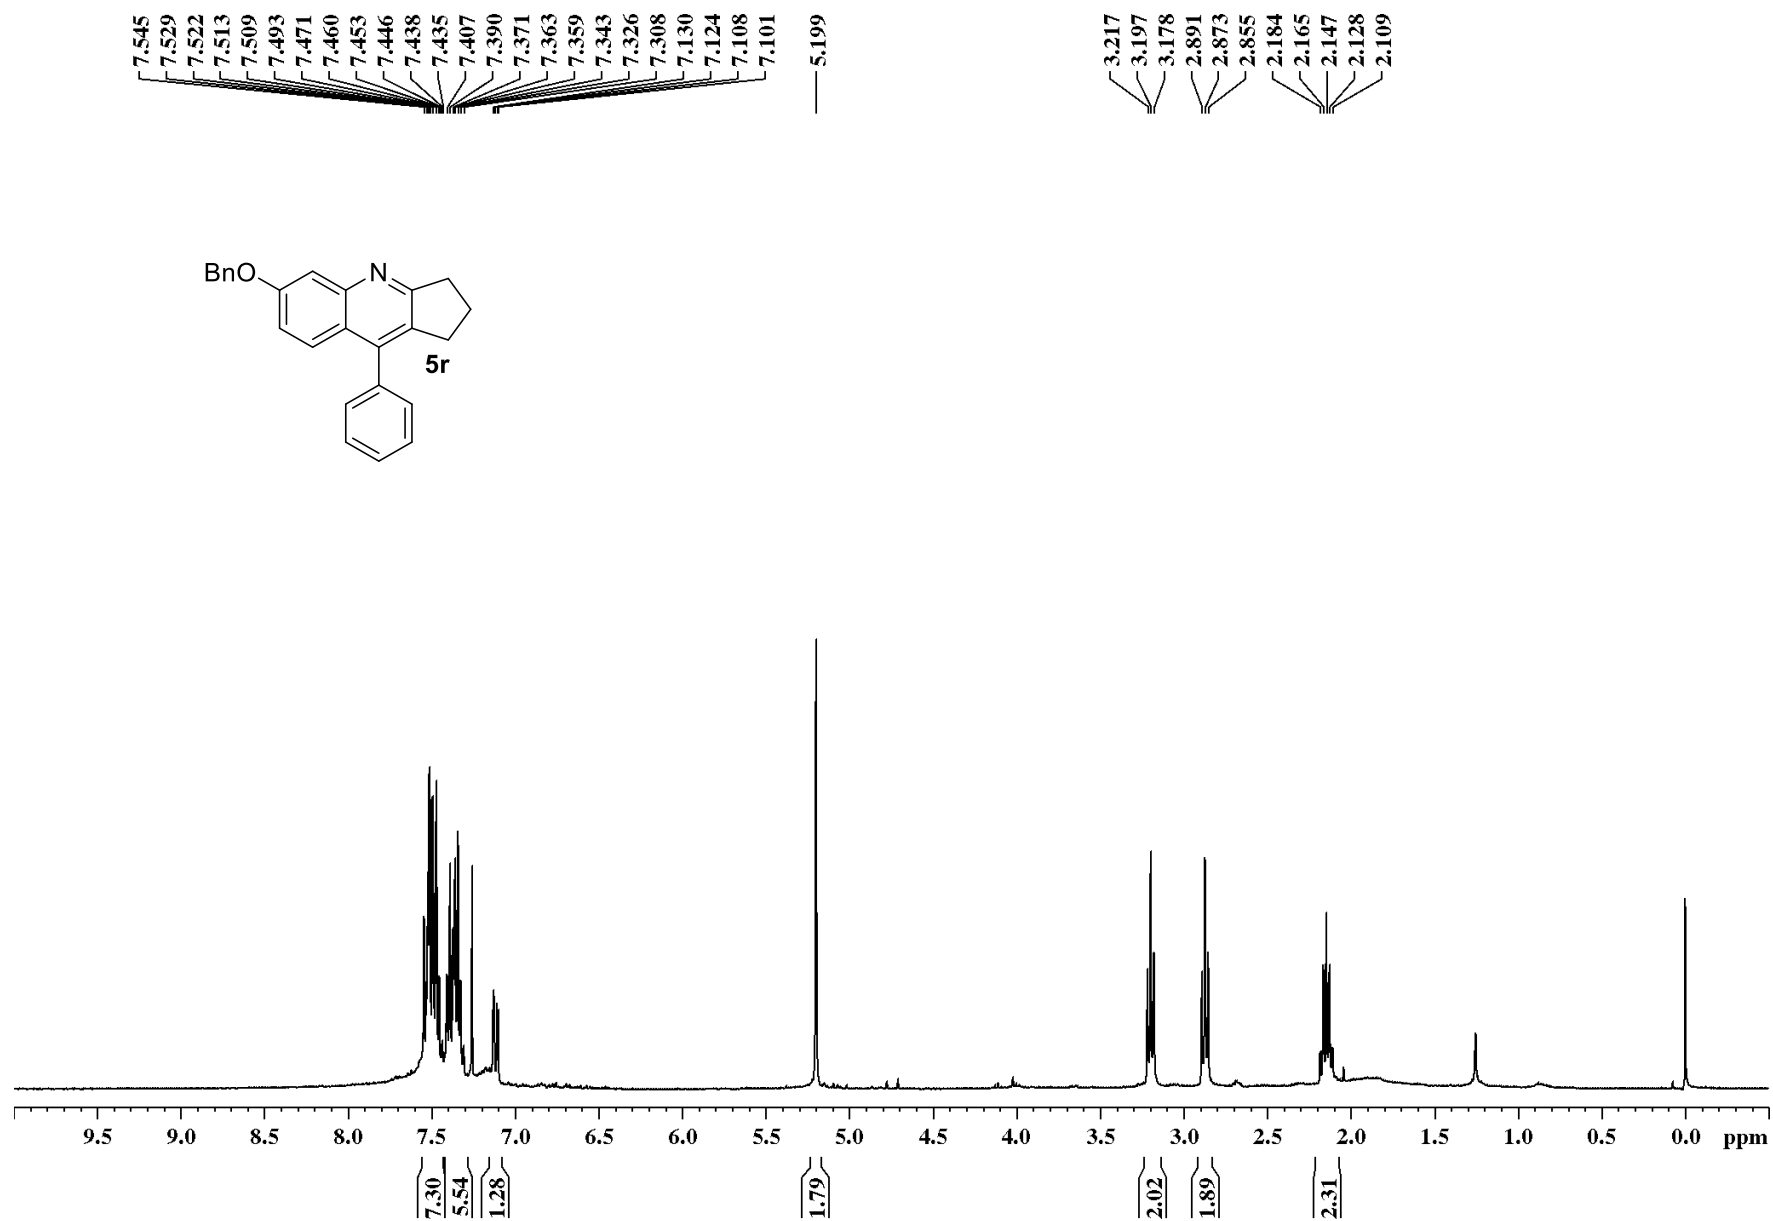

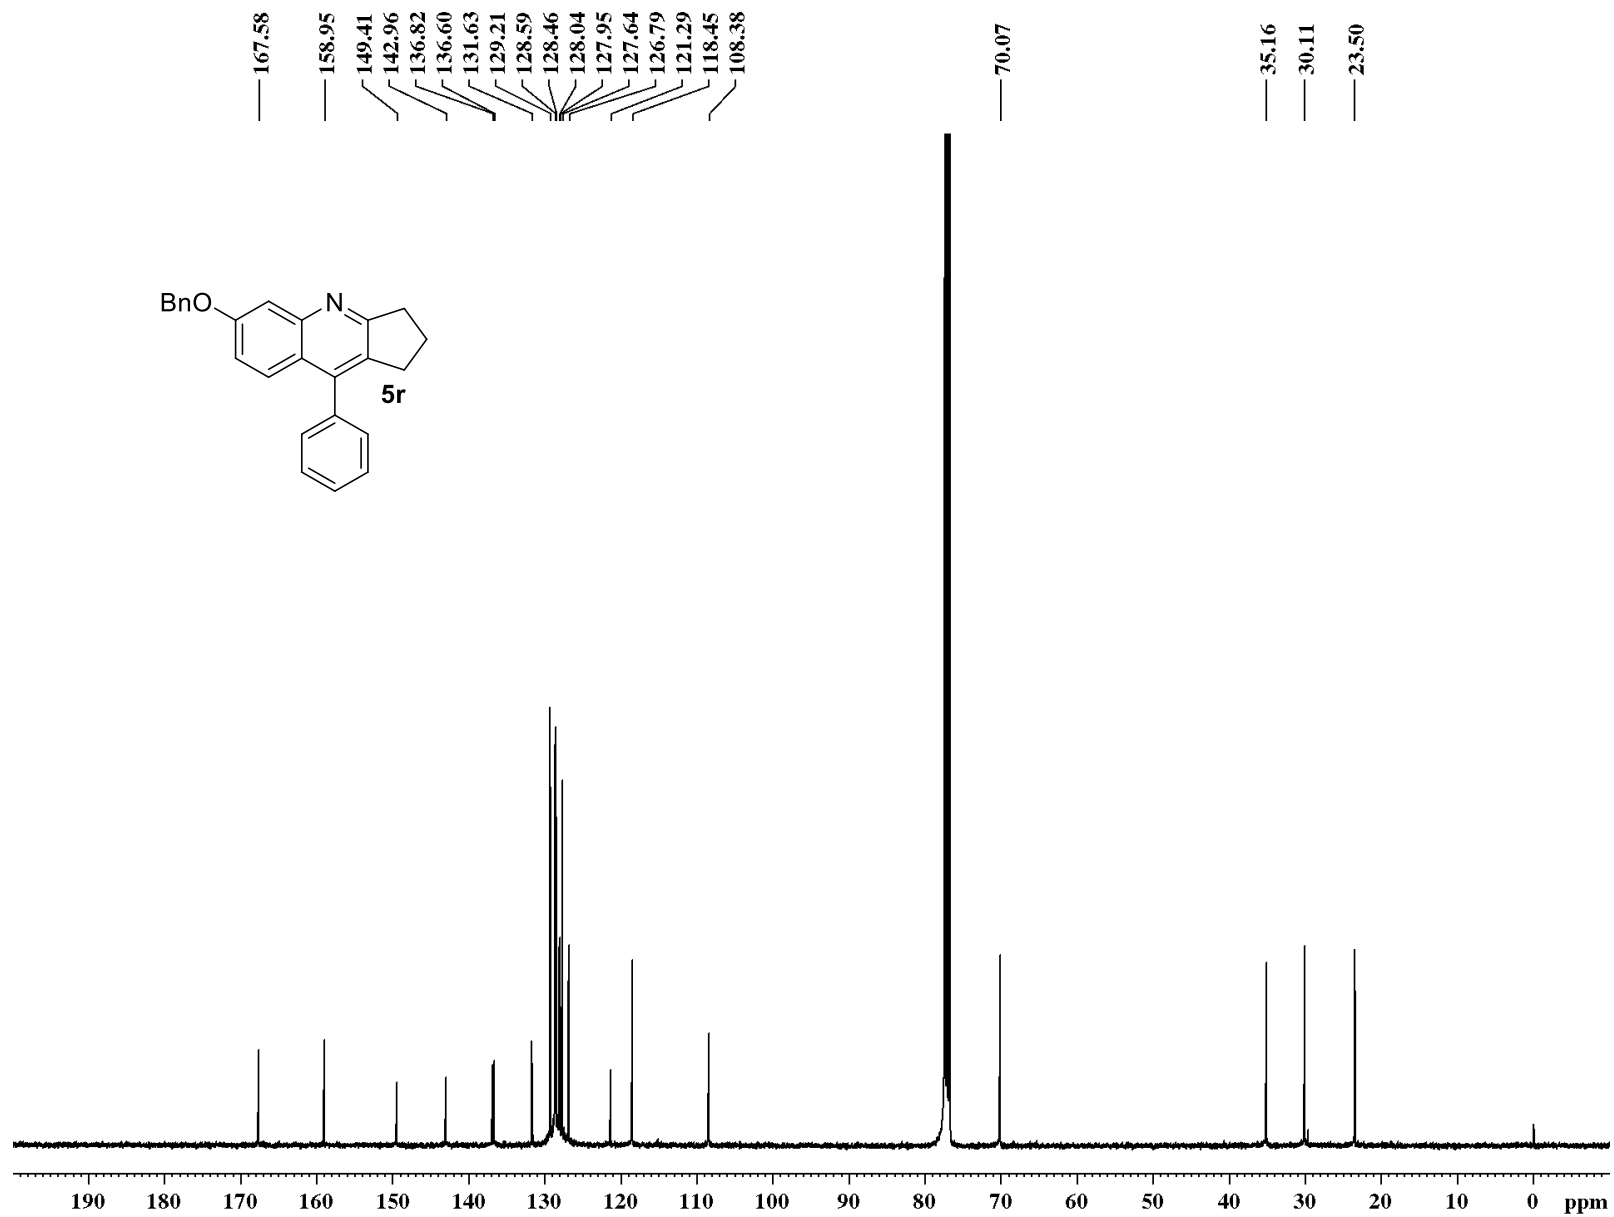

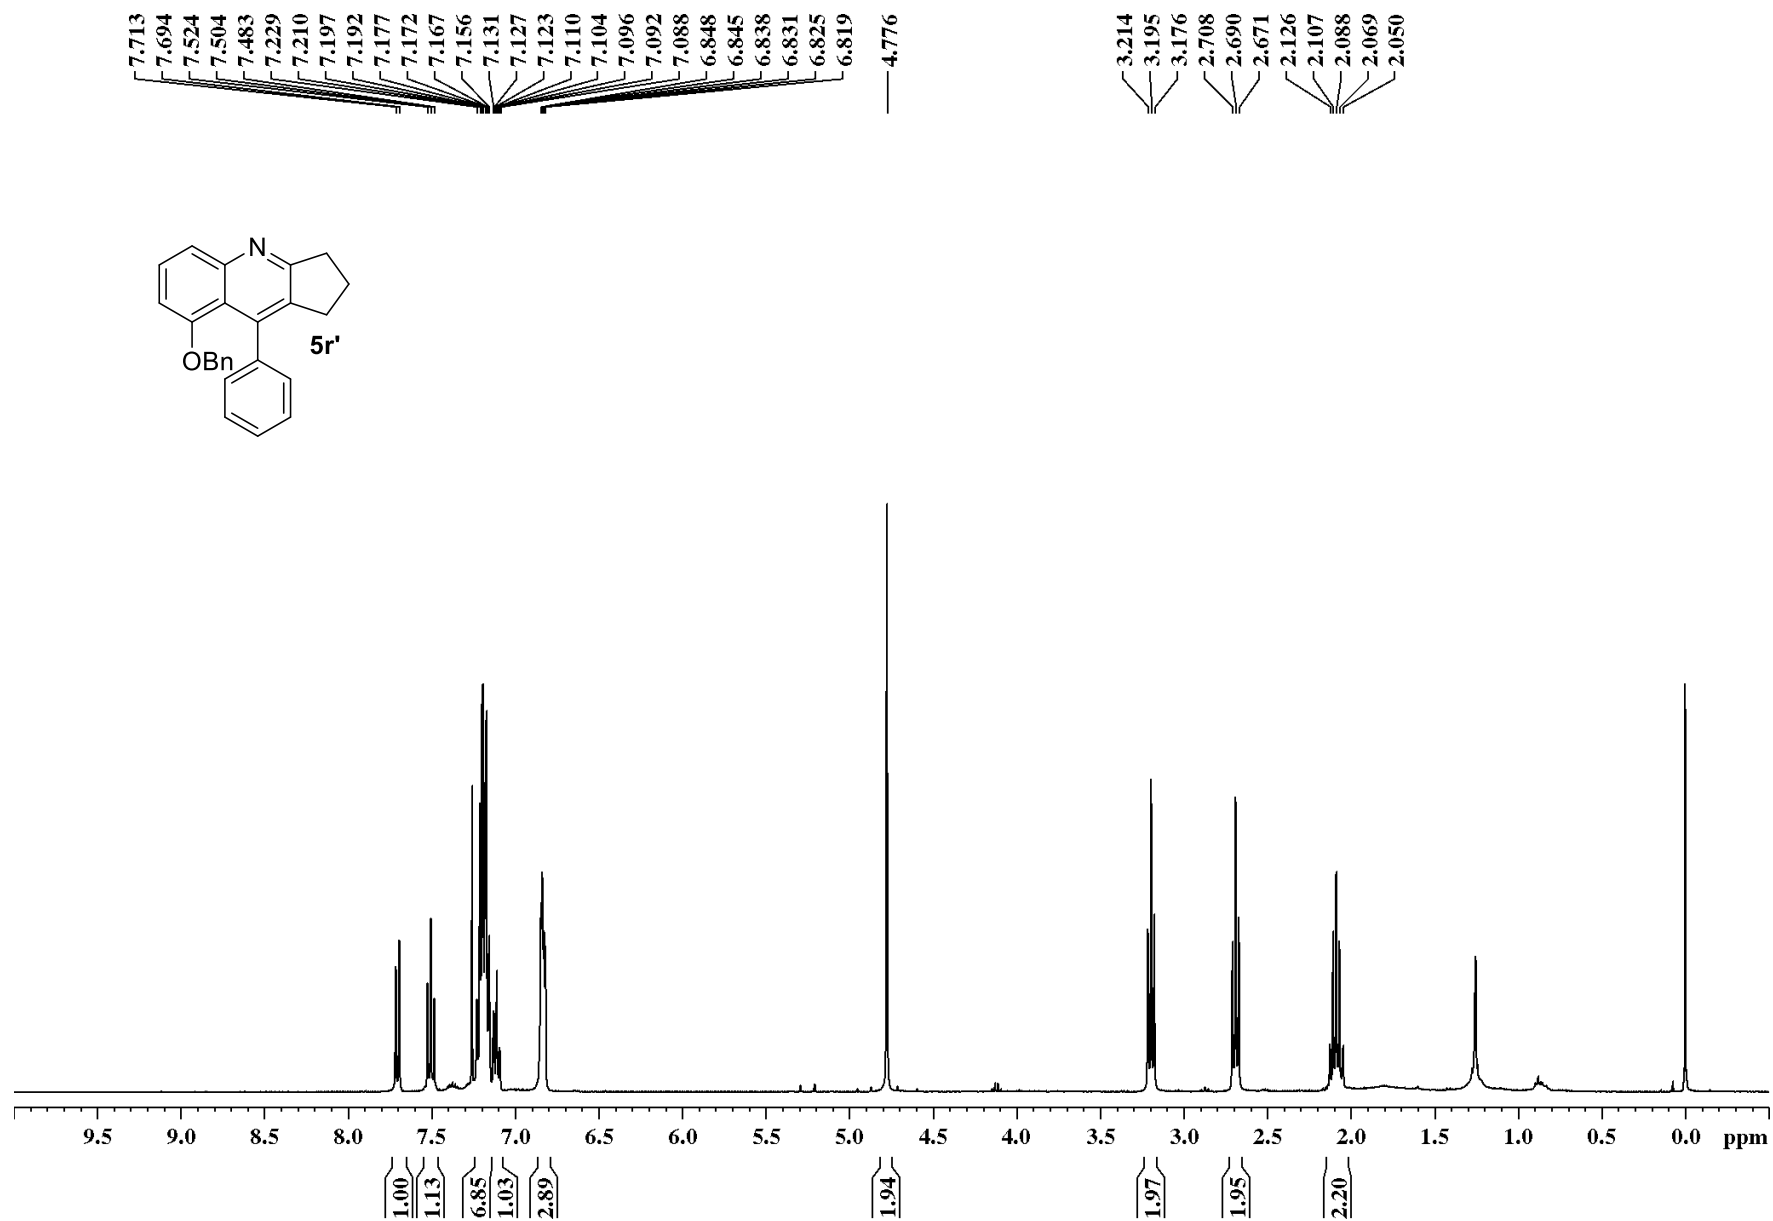

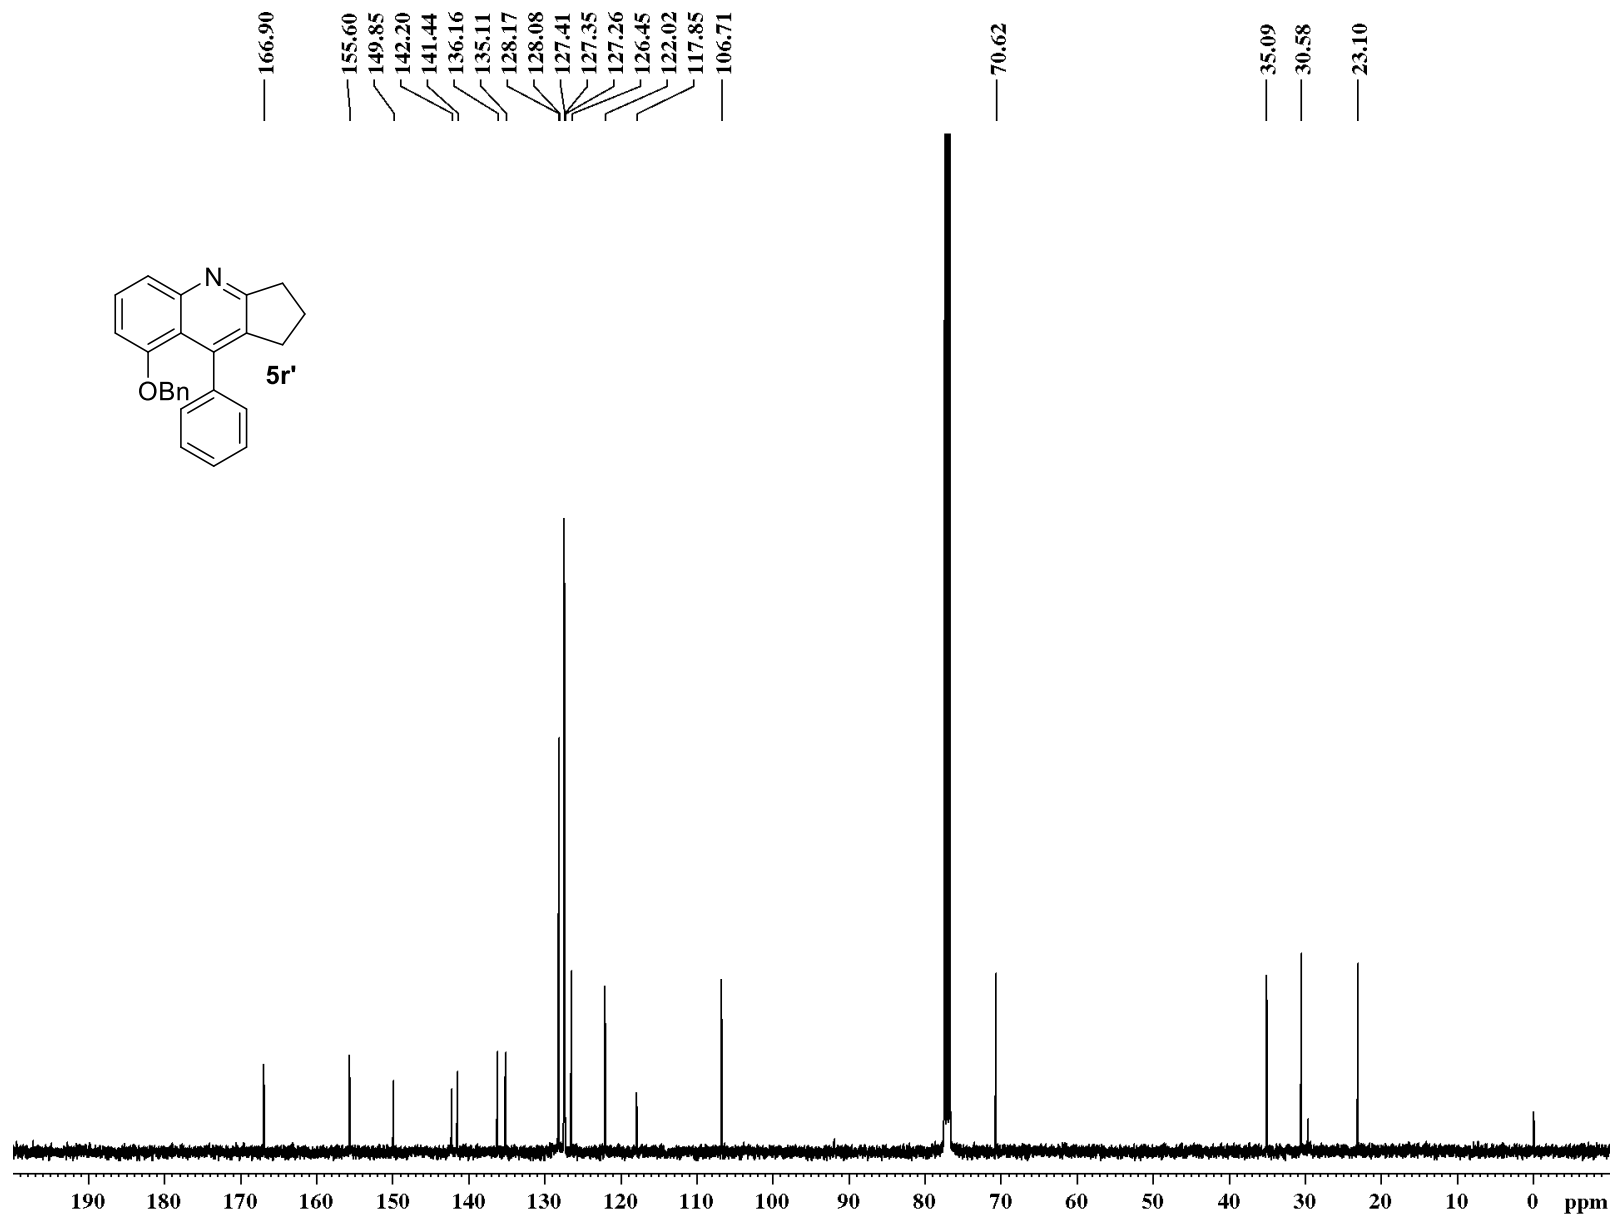

7.536  
7.532  
7.505  
7.497  
7.484  
7.468  
7.459  
7.418  
7.395  
7.311  
7.305  
7.292  
6.921  
6.916  
6.898  
6.893

3.200  
3.181  
3.162  
2.848  
2.829  
2.811  
2.149  
2.130  
2.112  
2.093  
2.075

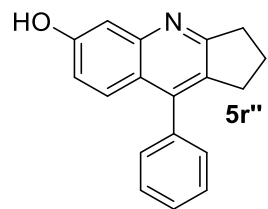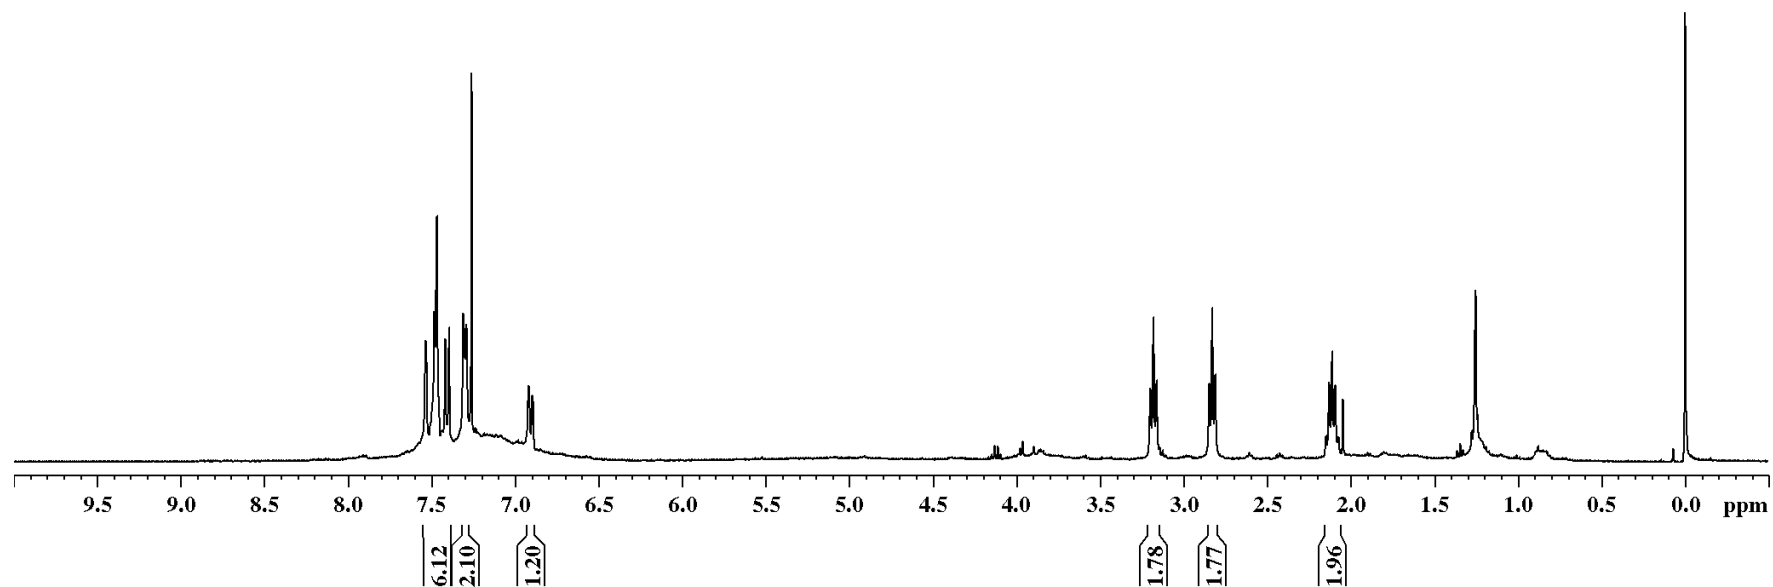



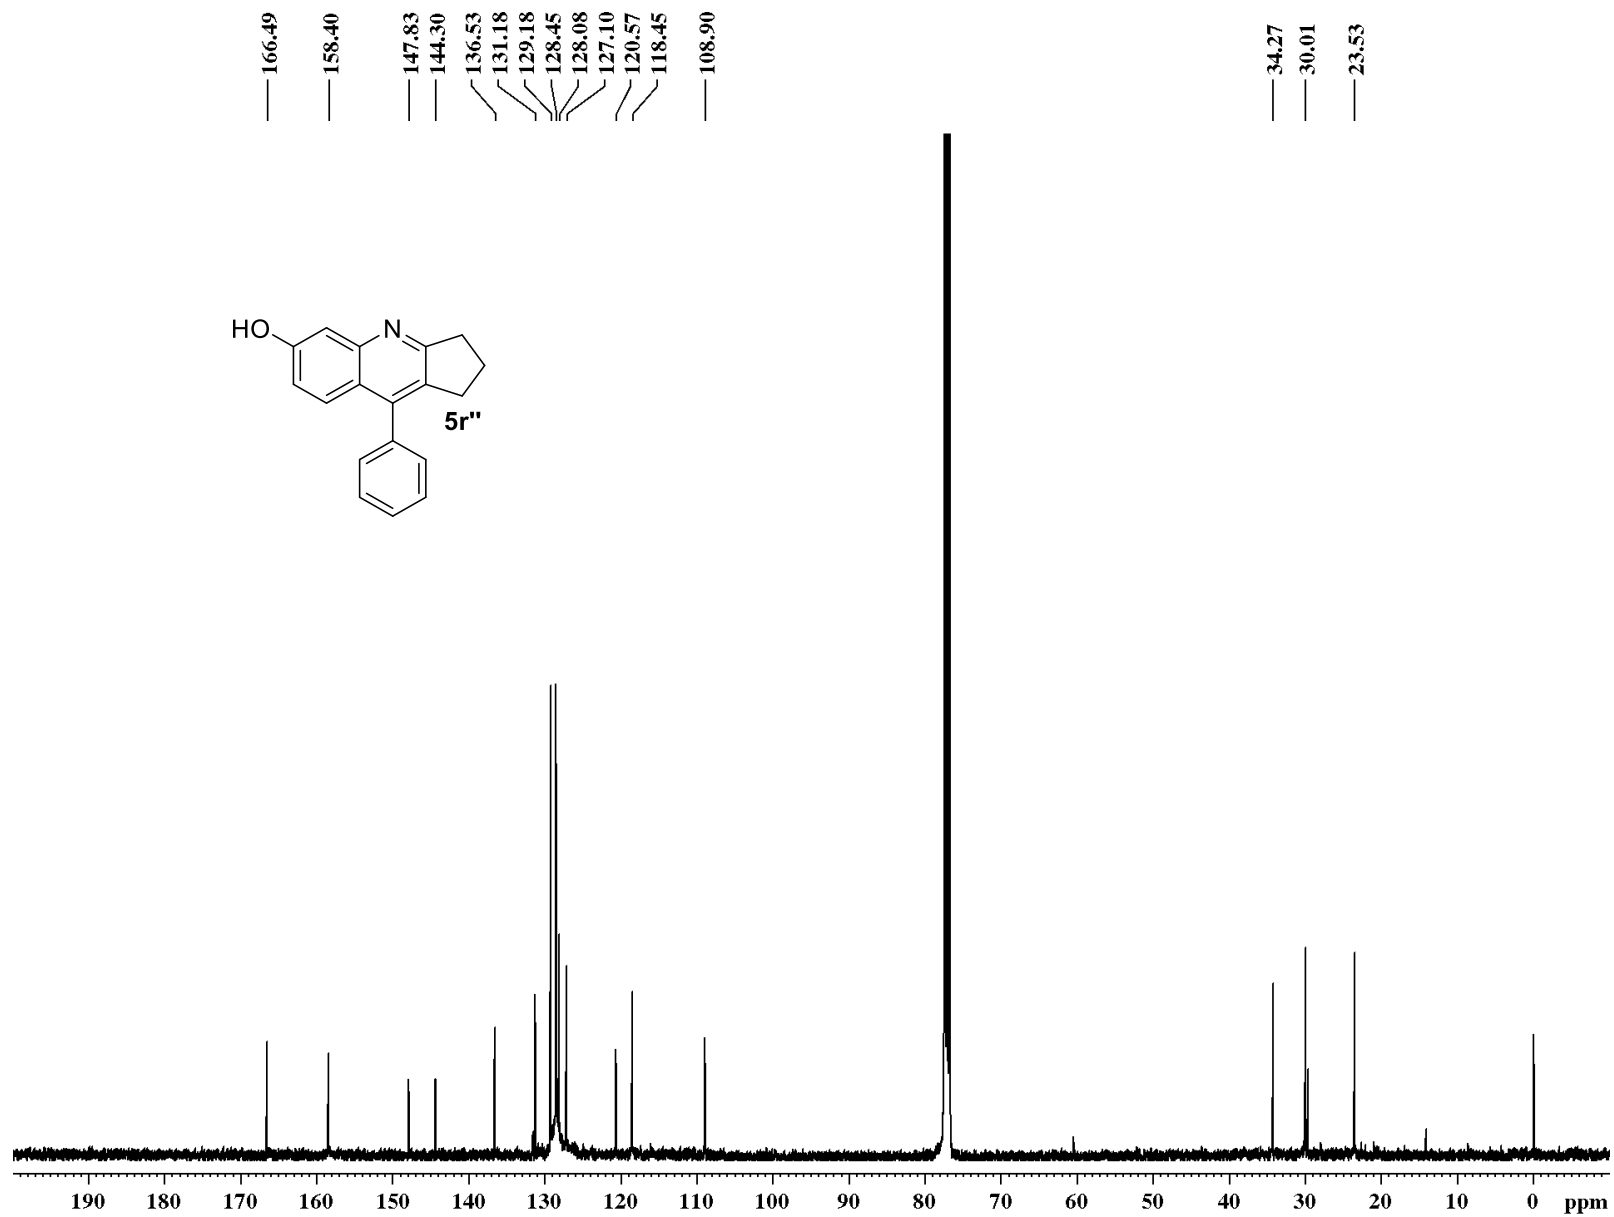

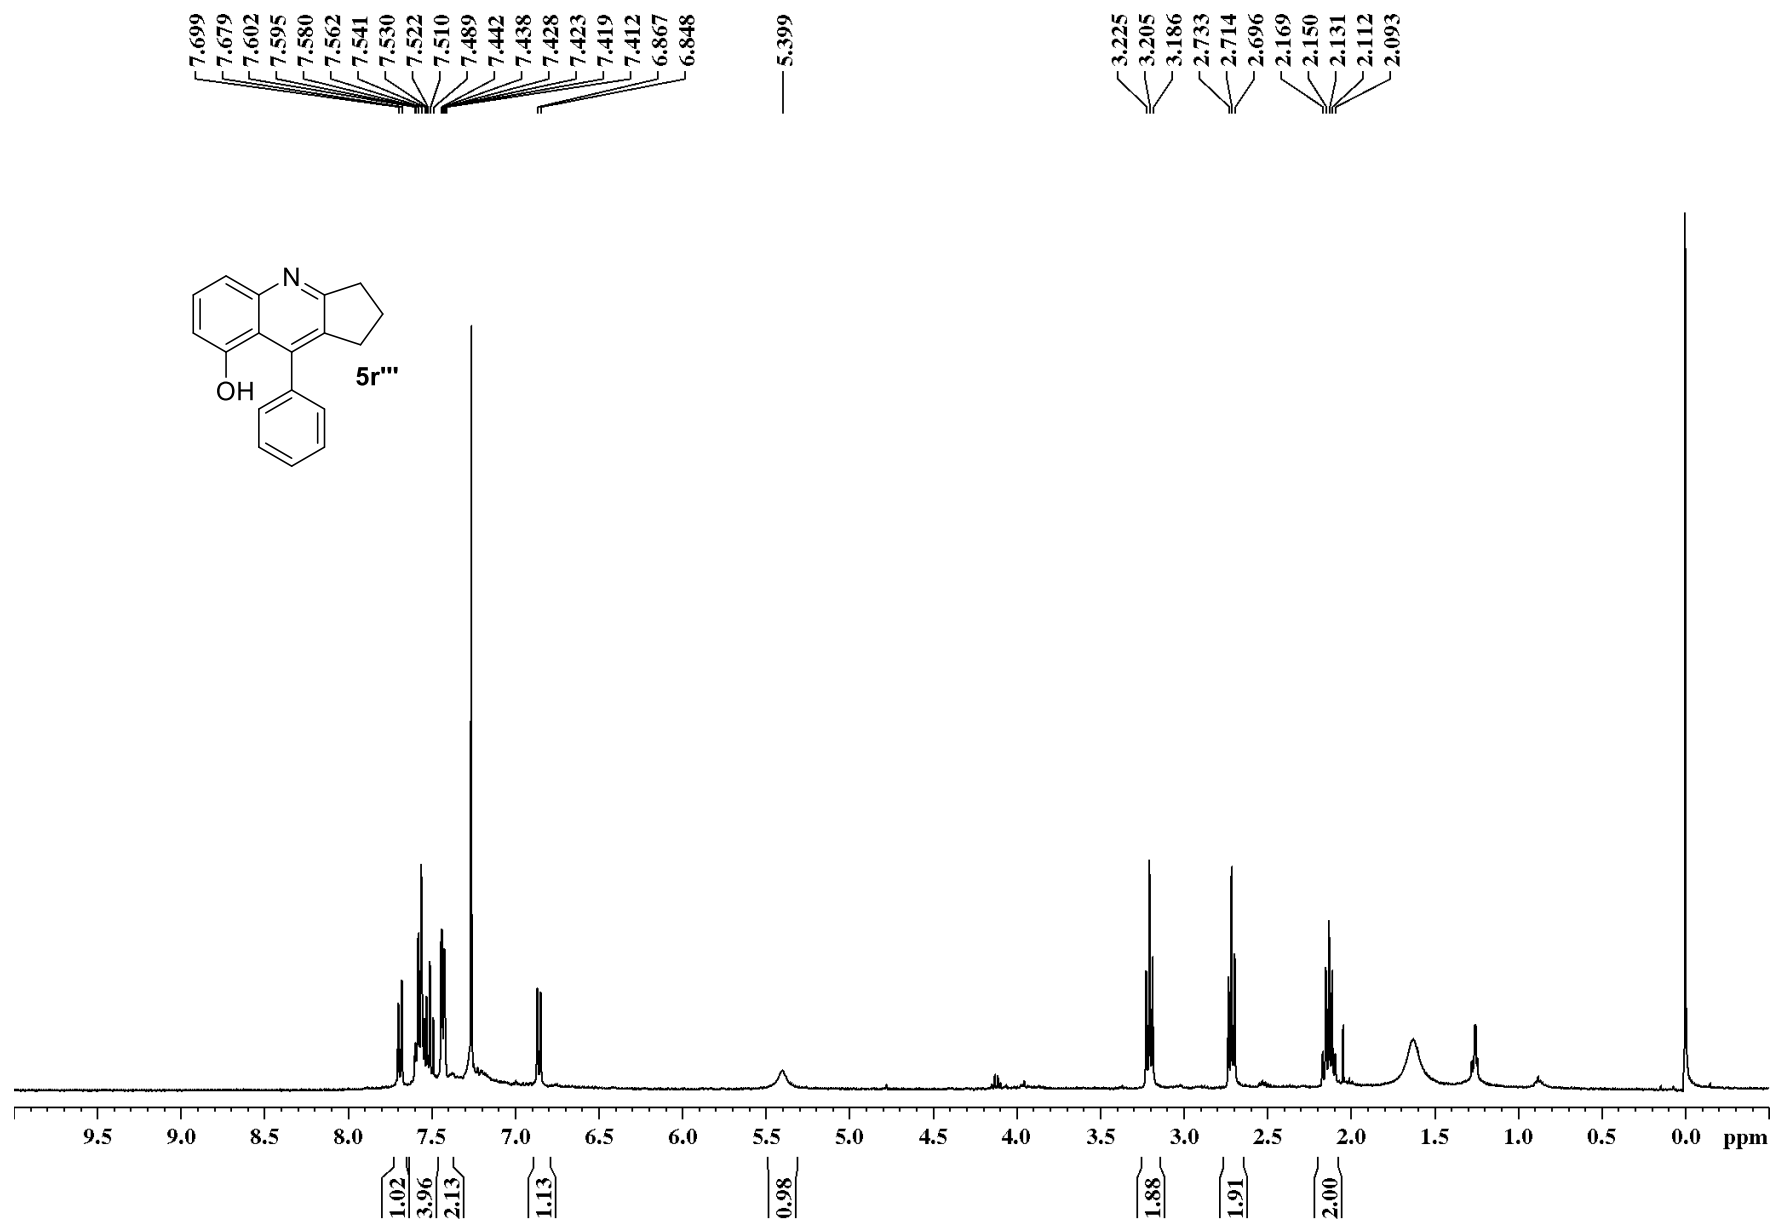

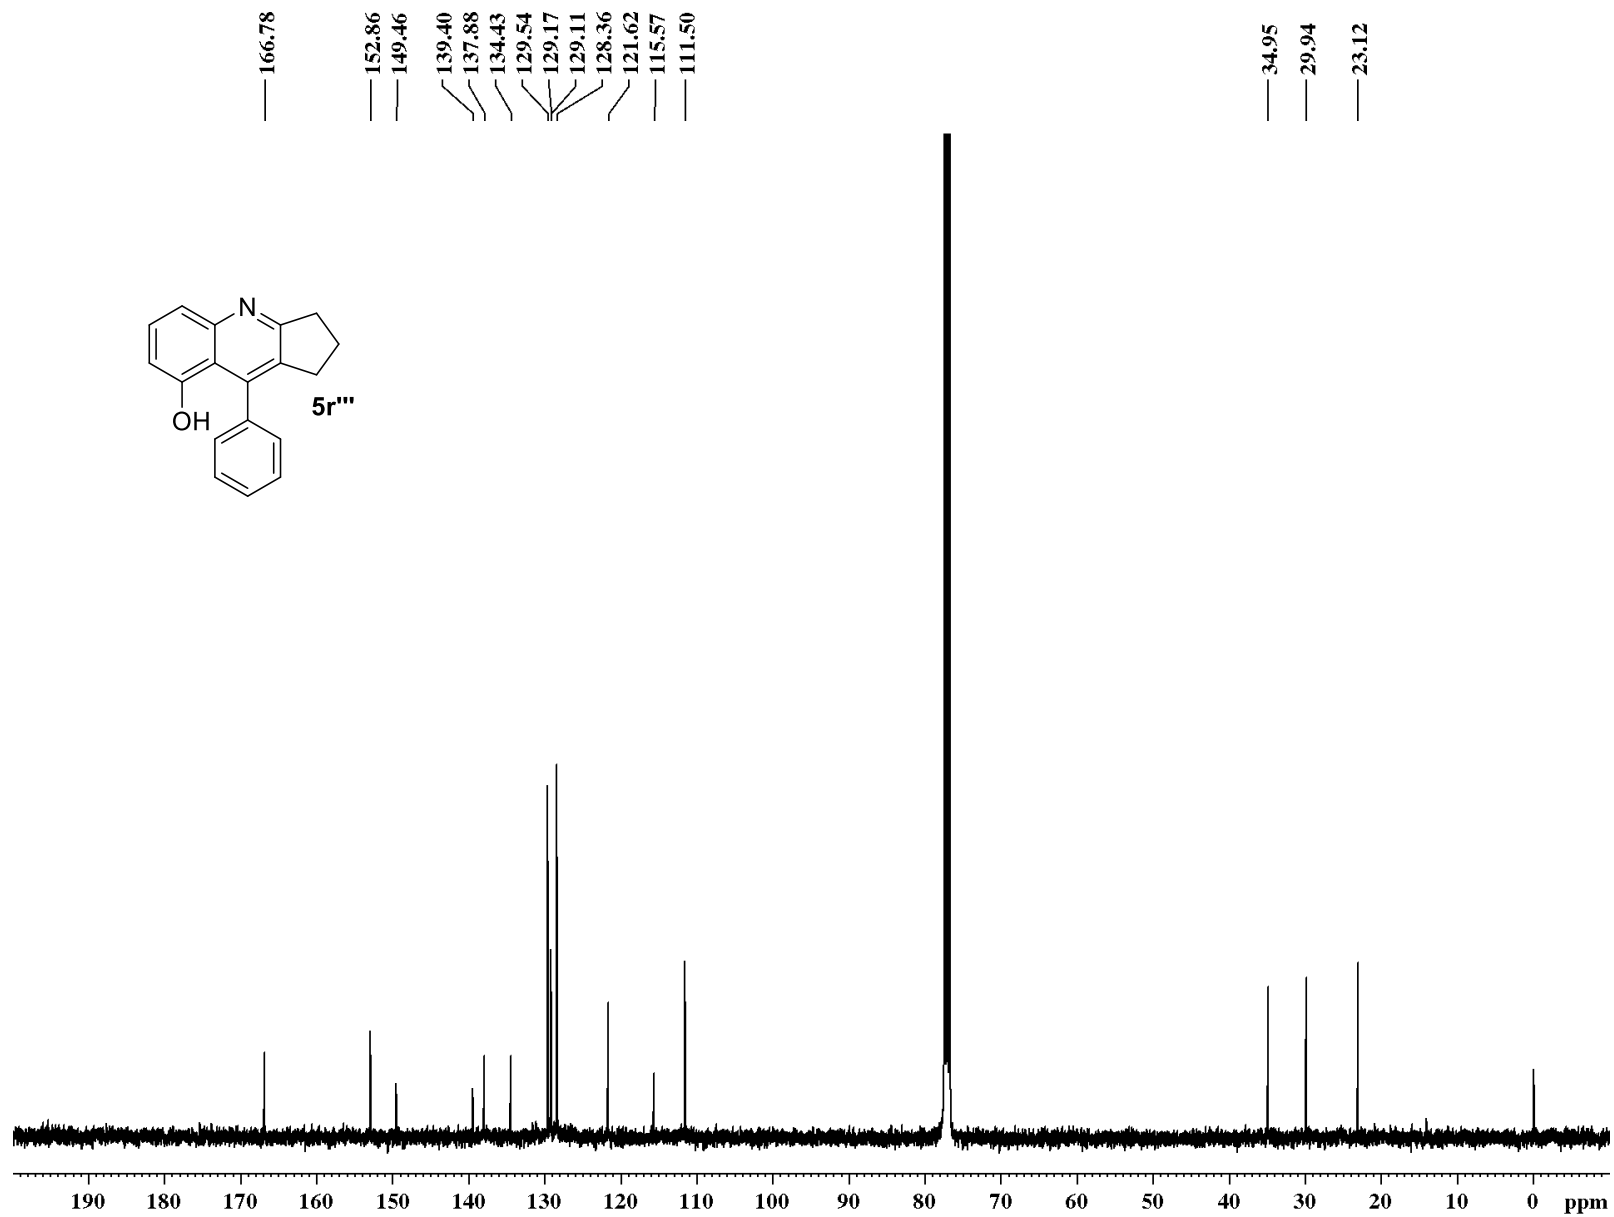

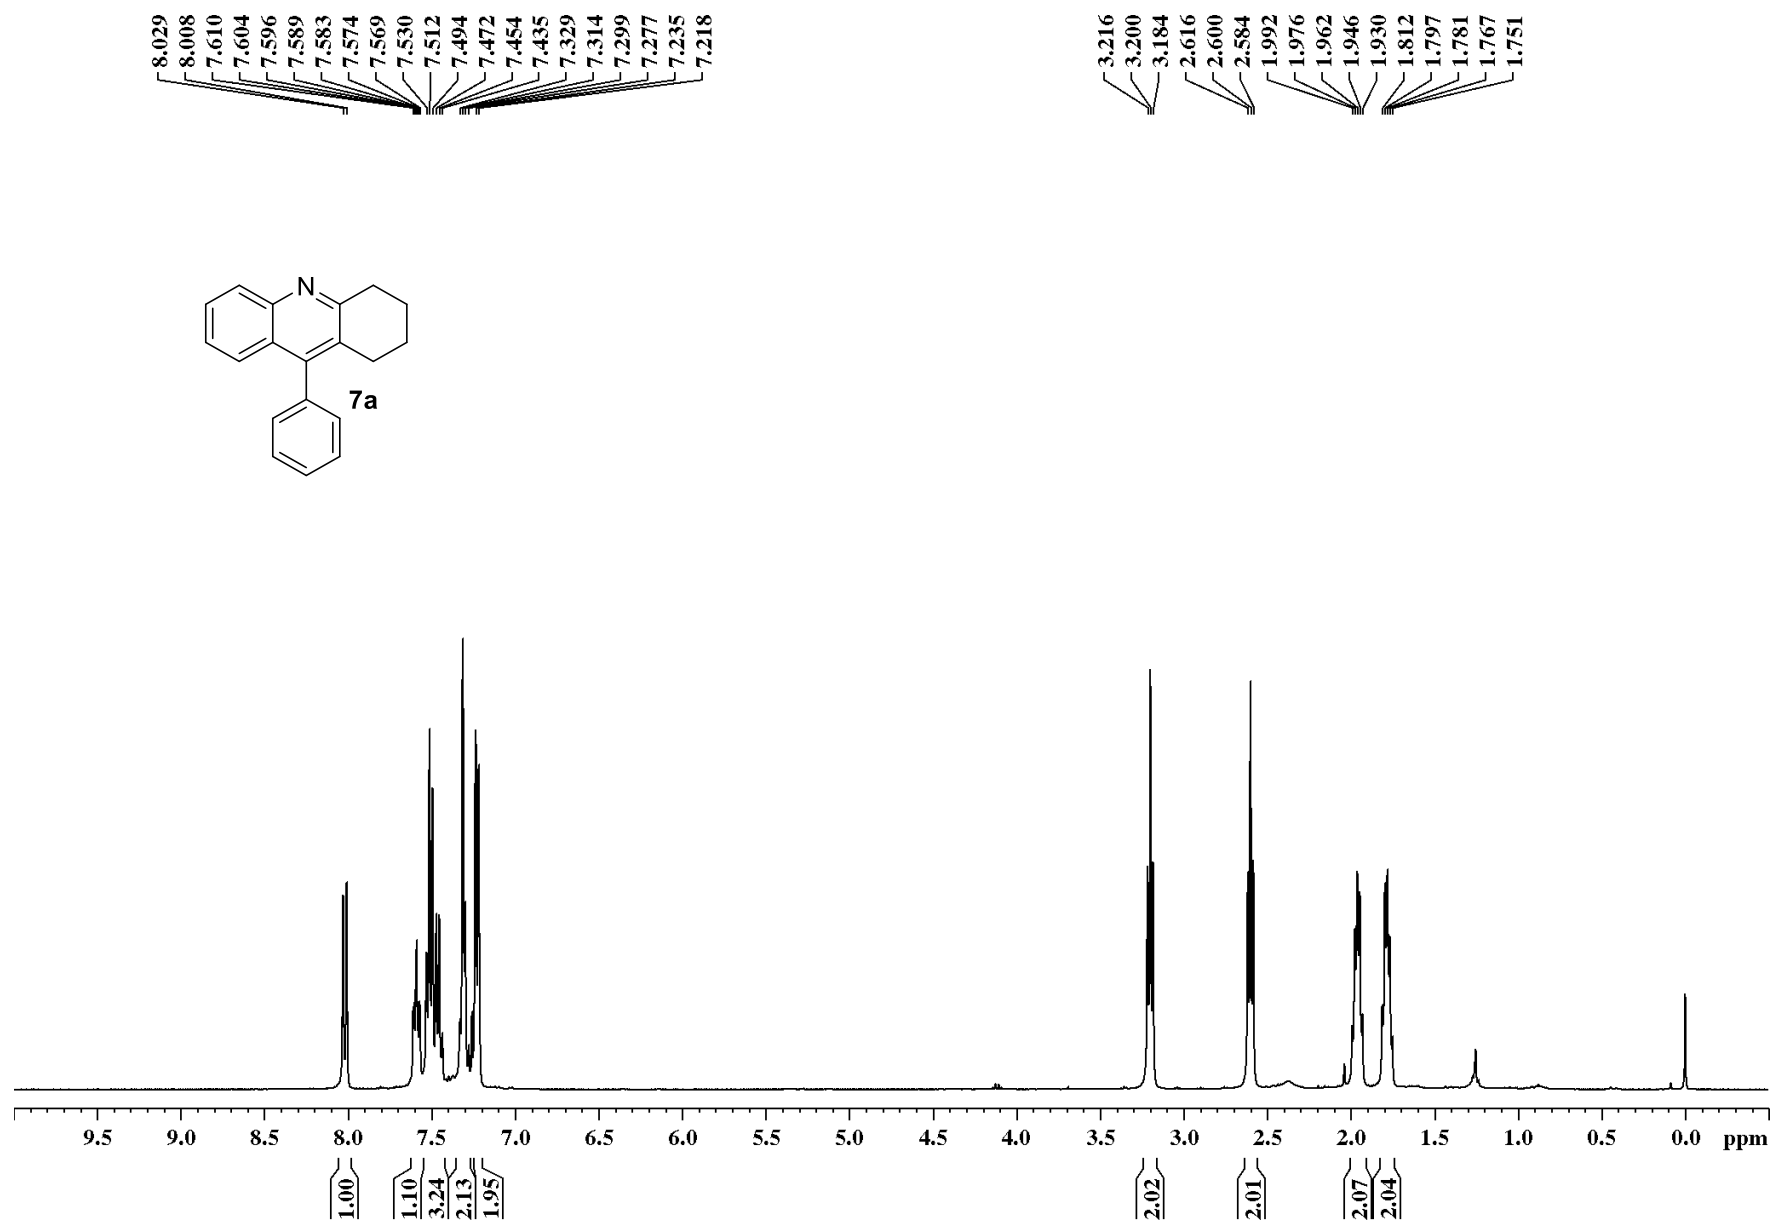

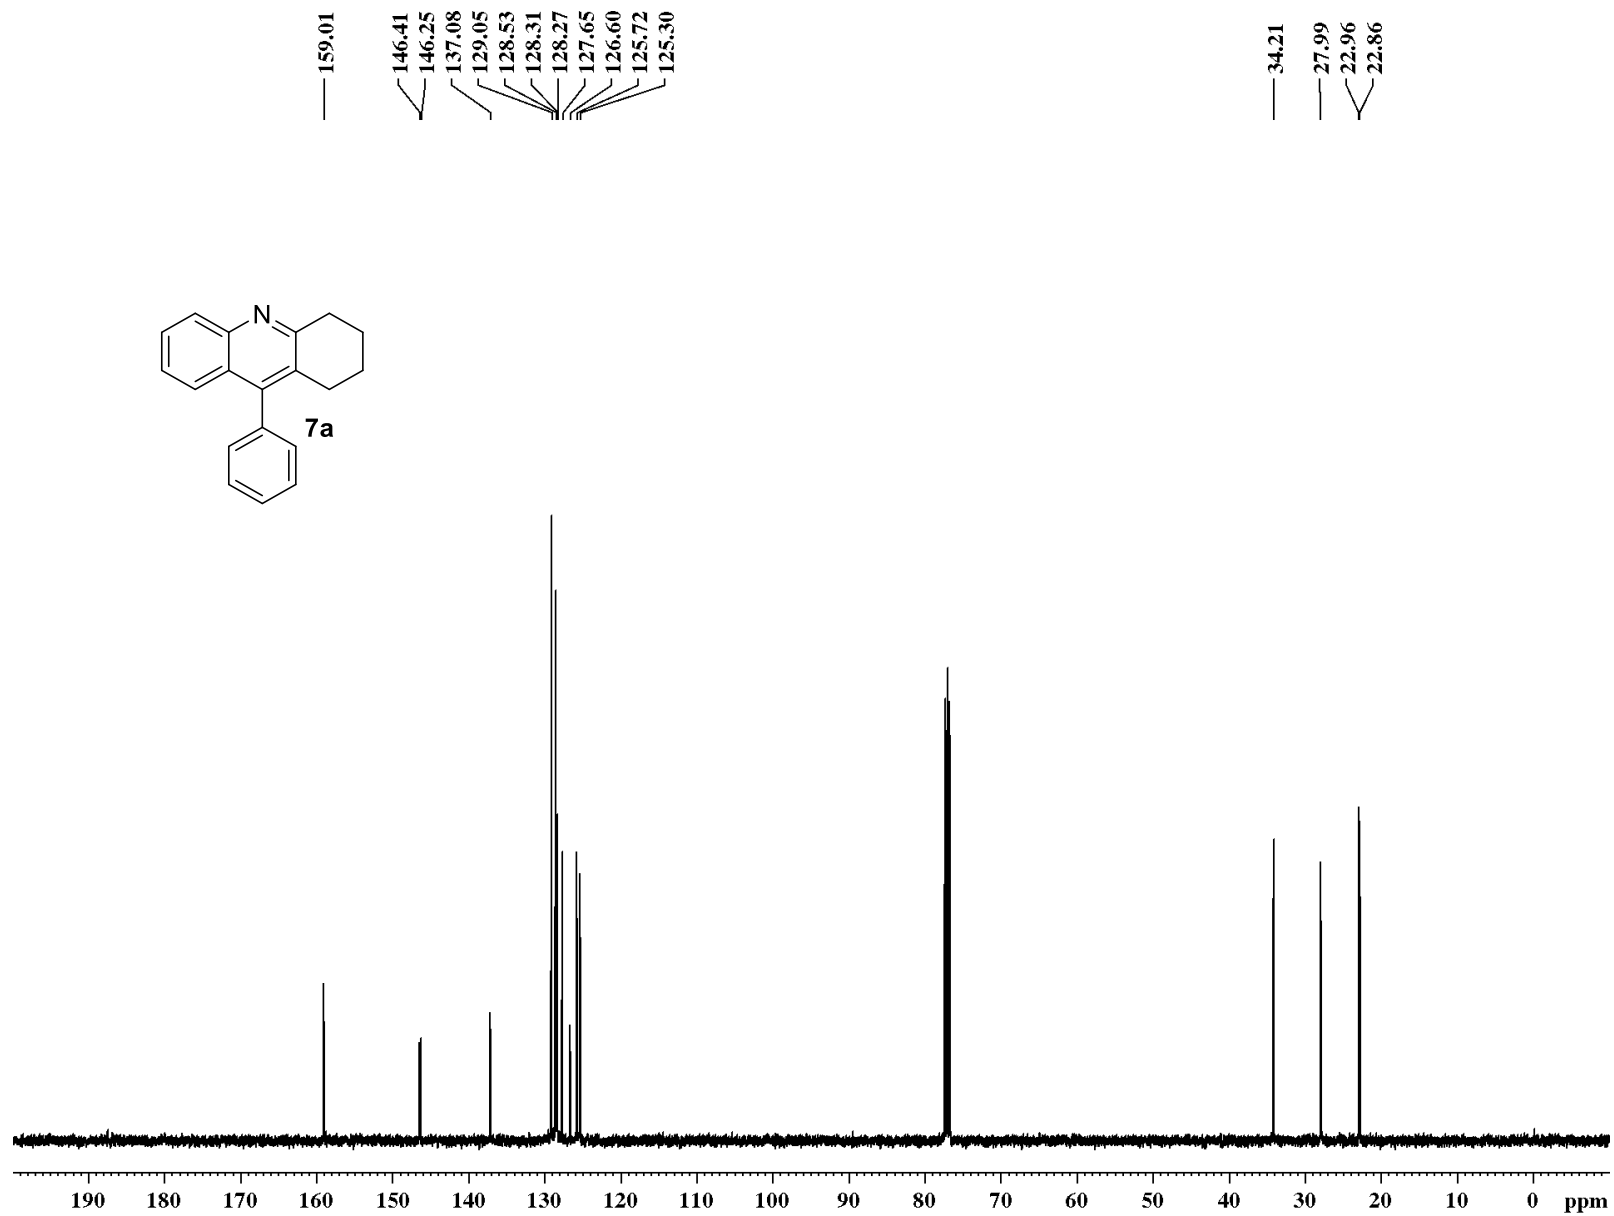

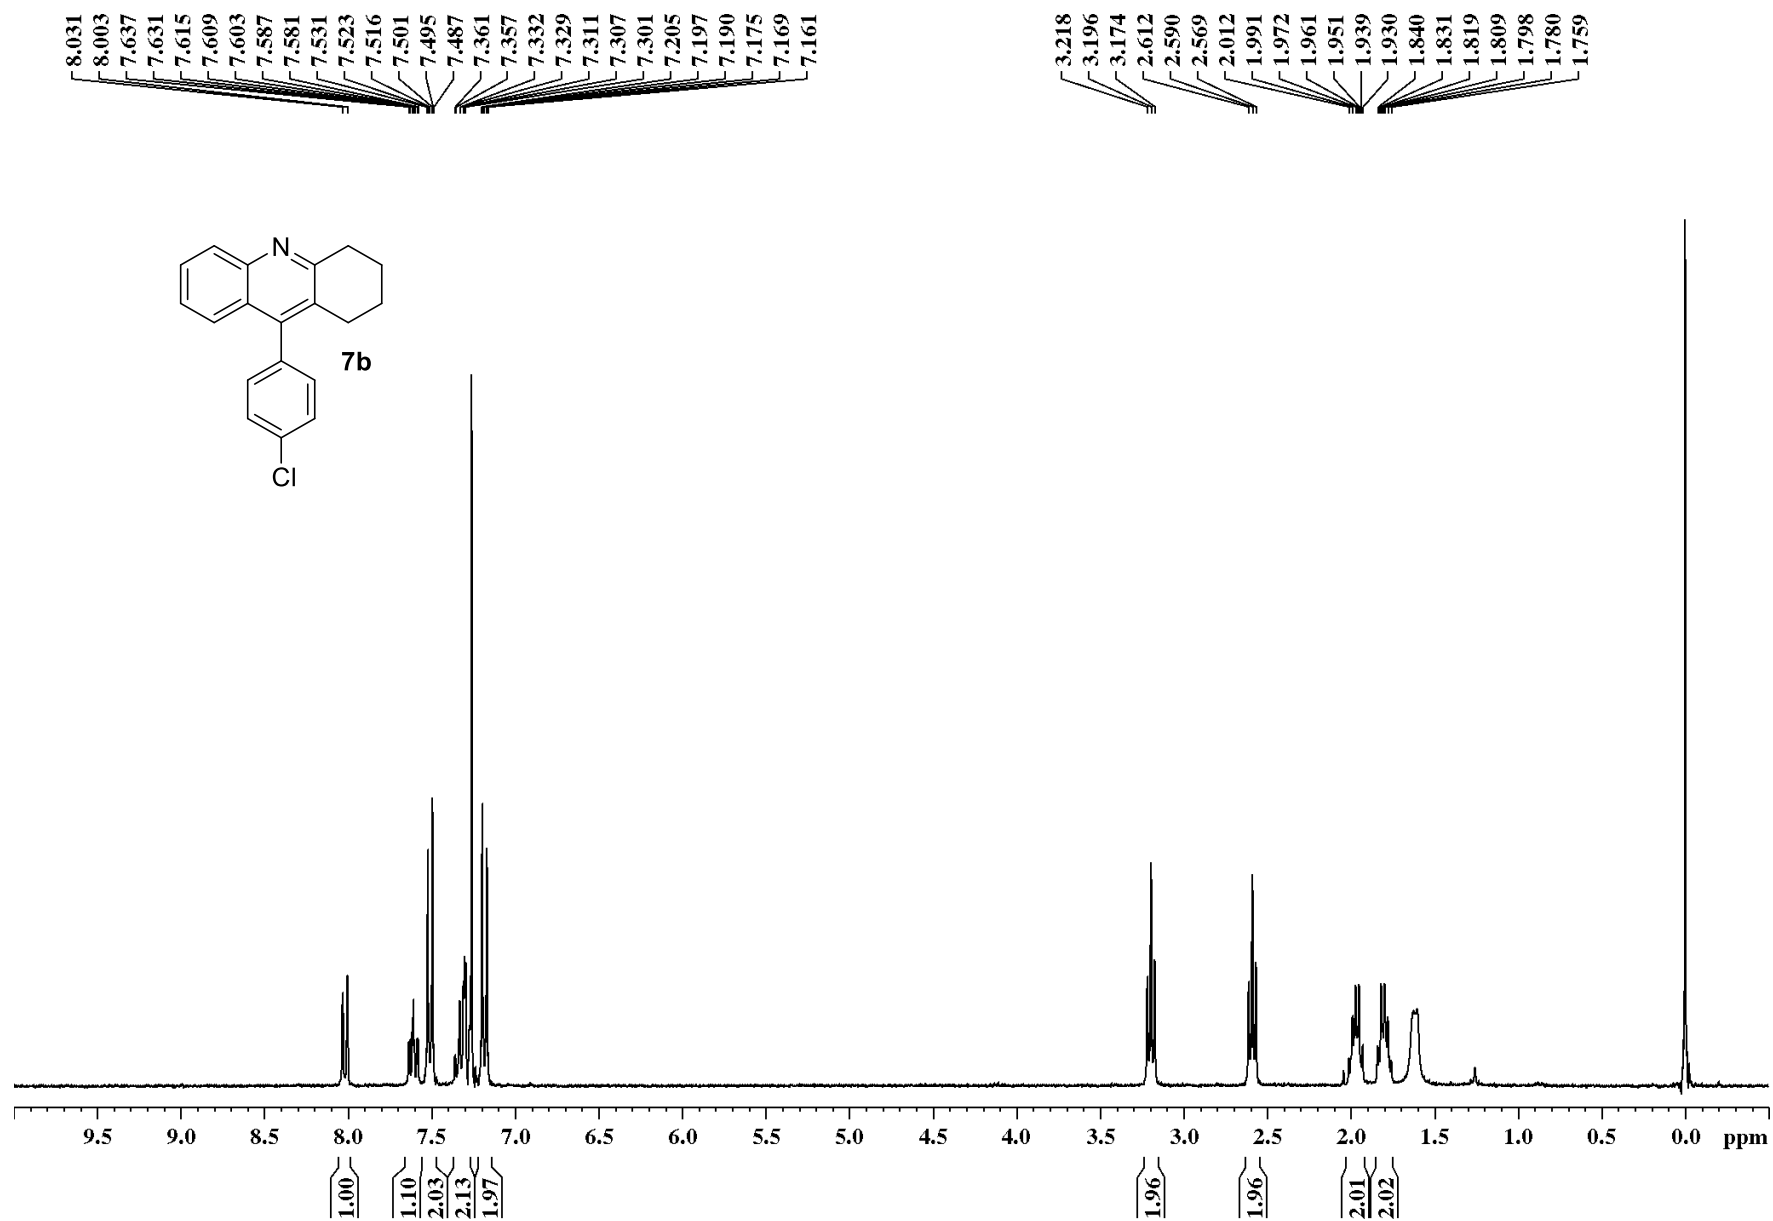

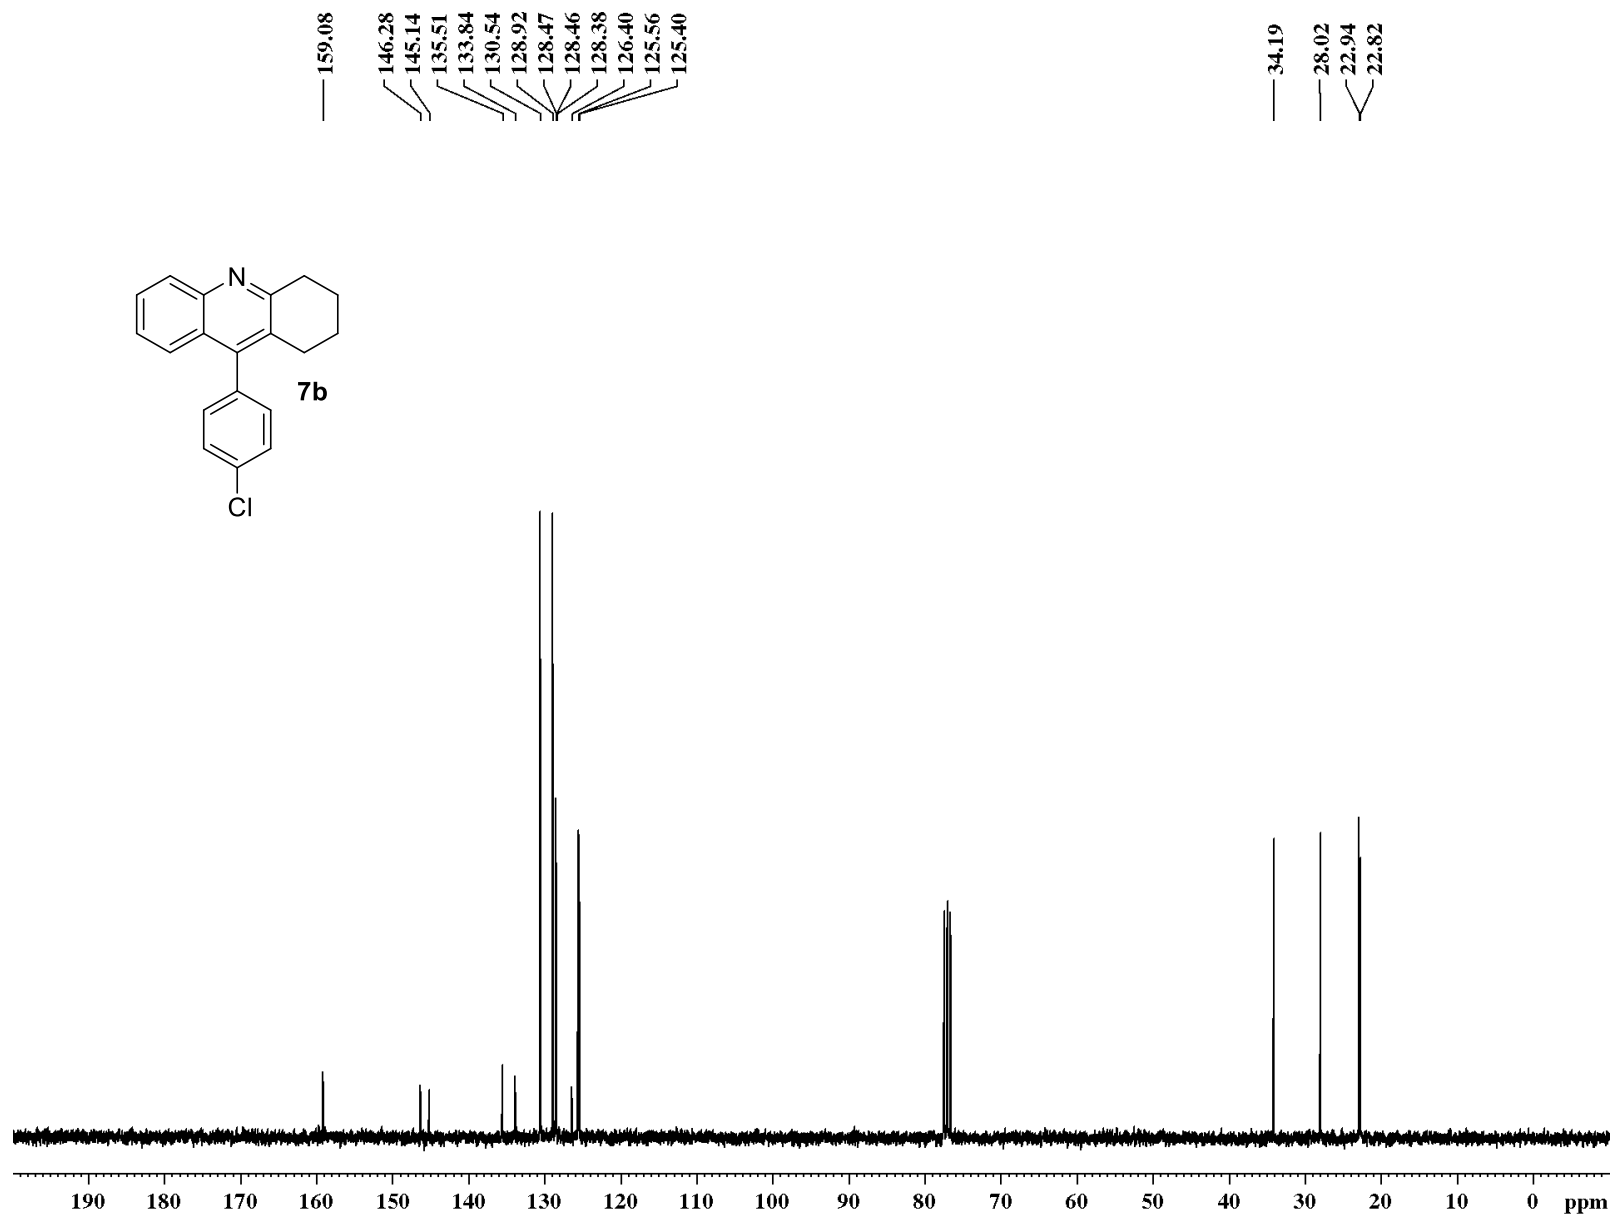

## Optimization of Method for the synthesis of indoloquinolines

*Ortho*-alkynylarylketone **1a** was employed as the substrate to screen for the optimal condition. To determine the ratio between indoloquinoline product and 1, 5-diketone by-product, we varied equivalent of TMSN<sub>3</sub> and TfOH as well as solvent and concentration to improve the yield of the desired product and reduce the formation of by-product. The isolated yield of compound **2a** and **3a** in each entry is summarized in the table below.

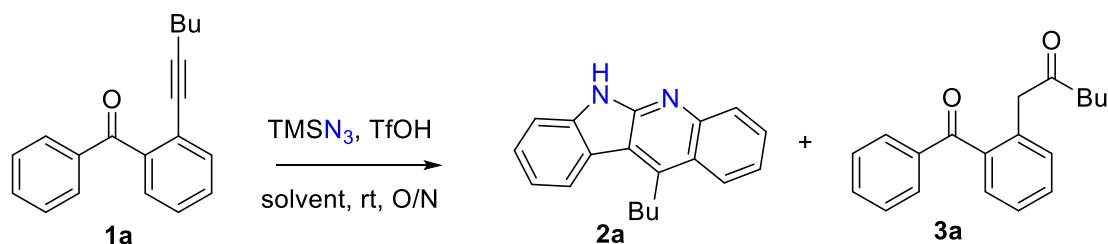

**Table S1.** Optimization for the synthesis of indoloquinoline **2a** from alkynylarylketone **1a**.

<sup>a</sup>Isolated yields.

| Entry    | Compound <b>1a</b><br>(equiv) | TMSN <sub>3</sub><br>(equiv) | TfOH<br>(equiv) | Solvent<br>(dry) | %yield <sup>a</sup> |           |
|----------|-------------------------------|------------------------------|-----------------|------------------|---------------------|-----------|
|          |                               |                              |                 |                  | <b>2a</b>           | <b>3a</b> |
| <b>1</b> | 1.0                           | 2.5                          | 2.5             | 0.1 M DCM        | 48                  | 22        |
| <b>2</b> | 1.0                           | 3.0                          | 3.0             | 0.1 M DCM        | 47                  | 16        |
| <b>3</b> | 1.0                           | 4.0                          | 4.0             | 0.1 M DCM        | 50                  | 19        |
| <b>4</b> | 1.0                           | 3.5                          | 3.5             | 0.1 M DCM        | 49                  | 23        |
| <b>5</b> | 1.0                           | 3.5                          | 3.5             | 0.2 M DCM        | 54                  | 13        |
| <b>6</b> | 1.0                           | 3.5                          | 3.5             | 0.2 M Toluene    | 46                  | 14        |
| <b>7</b> | 1.0                           | 3.5                          | 3.5             | 0.3 M DCM        | 58                  | 8         |



### Optimization of Method for the synthesis of carbocycle-fused quinolines

To screen for the optimal condition,  $\alpha$ -alkynylarylketone **4a** was used as the precursor. Compound **4a** was treated under the optimal condition of indoloquinoline method, resulting moderate yield of desired product **5a**. In order to improve the yield of product, we varied various variables (TMSN<sub>3</sub>, TfOH, solvents and concentrations, time and temperature. The result of the optimizations is shown in Table 2.

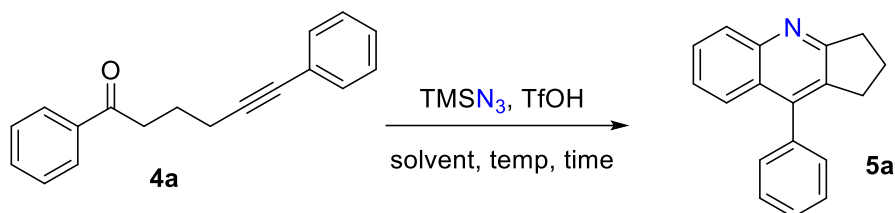

**Table S2.** Optimization for the carbocycle-fused quinoline **5a** from  $\alpha$ -alkynylarylketone **4a**.

<sup>a</sup>Isolated yields.

| Entry | Compound <b>4a</b><br>(equiv) | TMSN <sub>3</sub><br>(equiv) | TfOH<br>(equiv) | Solvent<br>(dry) | Time      | %yield <sup>a</sup> |
|-------|-------------------------------|------------------------------|-----------------|------------------|-----------|---------------------|
| 1     | 1.0                           | 3.5                          | 3.5             | 0.3 M DCM        | O/N, rt   | 58                  |
| 2     | 1.0                           | 1.2                          | 1.2             | 0.1 M DCM        | 1 h, rt   | 77                  |
| 2     | 1.0                           | 1.2                          | 1.1             | 0.1 M Tolulene   | 1 h, rt   | 54                  |
| 3     | 1.0                           | 1.2                          | 1.2             | 0.05 M DCM       | 1 h, rt   | 71                  |
| 4     | 1.0                           | 1.2                          | 1.2             | 0.2 M DCM        | 1 h, rt   | 75                  |
| 5     | 1.0                           | 1.2                          | 1.1             | 0.1 M DCM        | 1 h, rt   | 65                  |
| 6     | 1.0                           | 1.0                          | 1.0             | 0.1 M DCM        | 1 h, rt   | 63                  |
| 7     | 1.0                           | 1.2                          | 1.2             | 0.1 M DCM        | 3 h, rt   | 72                  |
| 8     | 1.0                           | 1.4                          | 1.4             | 0.1 M DCM        | 1 h, rt   | 75                  |
| 9     | 1.0                           | 2.0                          | 2.0             | 0.1 M DCM        | 1 h, 0 °C | 67                  |
